# Supplementary material for: Identifying restrictions in the order of accumulation of mutations during tumor progression: effects of passengers, evolutionary models, and sampling
Source: PubMed Central journal article supplement (PMC4339747; doi:10.1186/s12859-015-0466-7), 2015-02-12

# Additional file 5. Examples of inferred graphs.

Supplementary material for “Identifying Restrictions in the Order of Accumulation of Mutations during Tumor Progression: Effects of Passengers, Evolutionary Models, and Sampling”

Ramon Diaz-Uriarte

Dept. Biochemistry, Universidad Autónoma de Madrid

Instituto de Investigaciones Biomédicas “Alberto Sols” (UAM-CSIC)

Madrid, Spain

`ramon.diaz@iib.uam.es`

`rdiaz02@gmail.com`

<http://ligarto.org/rdiaz>

## Contents

|   |                                 |    |
|---|---------------------------------|----|
| 1 | Introduction                    | 2  |
| 2 | Drivers Known                   | 2  |
| 3 | Drivers Unknown: Filtering = S1 | 7  |
| 4 | Drivers Unknown: Filtering = S5 | 12 |
| 5 | Drivers Unknown: Filtering = J1 | 17 |
| 6 | Drivers Unknown: Filtering = J5 | 22 |

## 1 Introduction

The following figures show examples of inferred graphs, from each of the six methods, for the two scenarios, and under each Model and Graph. The inferred graph shown is one chosen randomly among the 20 possible ones. Across rows (i.e., across Method), the data set is the same, so those correspond to the same data being fitted by different methods.

To minimize the impact of other factors, all figures are for  $S.Size = 1000$ ,  $S.Type = \text{whole tumor}$  (0.5),  $S.Time = \text{last}$ , and  $sh = \text{Inf}$ .

The original, true graphs, are given in *Additional file 1*. Note that, especially under  $\text{Filtering} = S1$ , many inferred graphs show nodes that are not really drivers (and that, therefore, should not have been in the graph at all).

## 2 Drivers Known

# Filtering = NP. Model = Bozic

11\_A, CBN

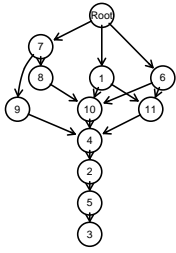

11\_A, CBN-A

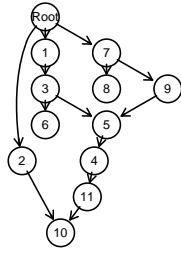

11\_A, DiP

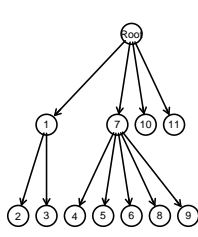

11\_A, DiP-A

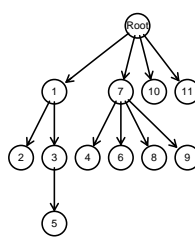

11\_A, OT

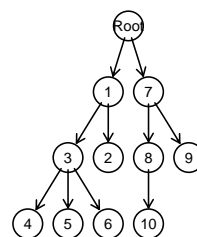

11\_A, OT-A

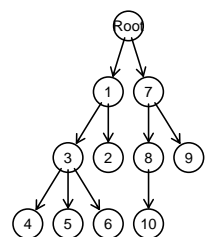

11\_B, CBN

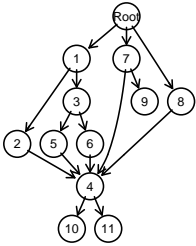

11\_B, CBN-A

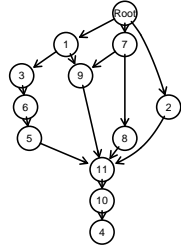

11\_B, DiP

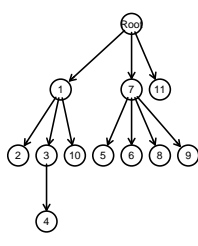

11\_B, DiP-A

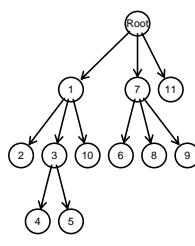

11\_B, OT

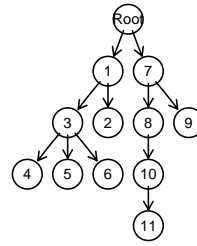

11\_B, OT-A

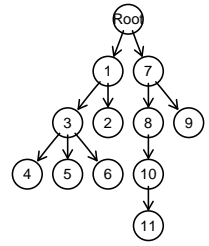

9\_A, CBN

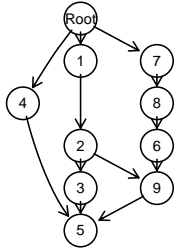

9\_A, CBN-A

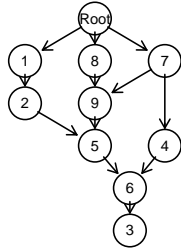

9\_A, DiP

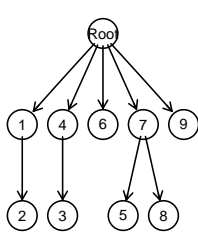

9\_A, DiP-A

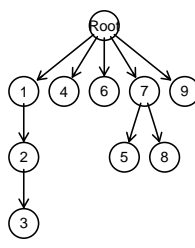

9\_A, OT

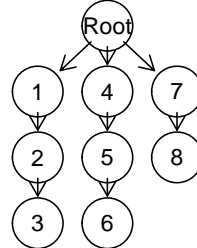

9\_A, OT-A

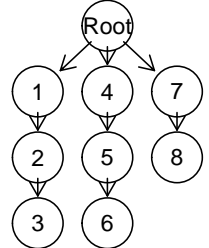

9\_B, CBN

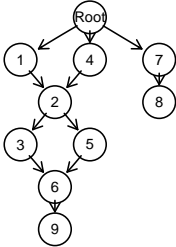

9\_B, CBN-A

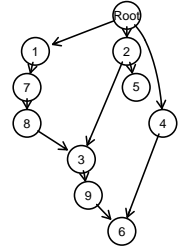

9\_B, DiP

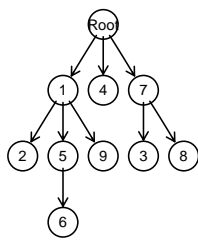

9\_B, DiP-A

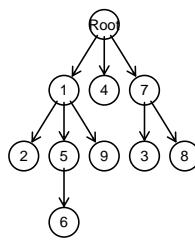

9\_B, OT

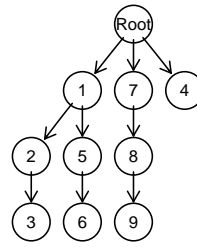

9\_B, OT-A

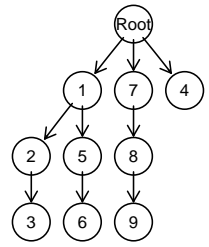

7\_A, CBN

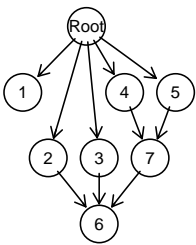

7\_A, CBN-A

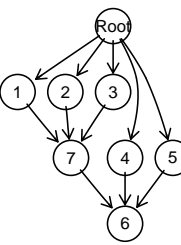

7\_A, DiP

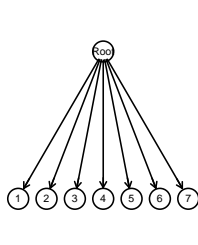

7\_A, DiP-A

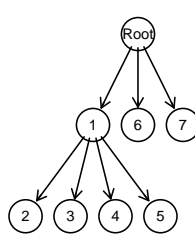

7\_A, OT

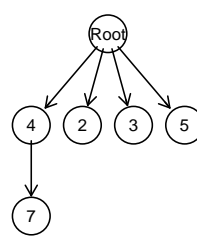

7\_A, OT-A

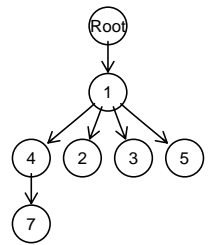

7\_B, CBN

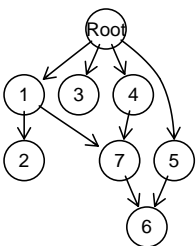

7\_B, CBN-A

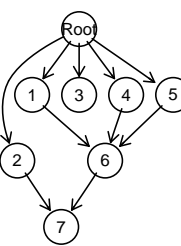

7\_B, DiP

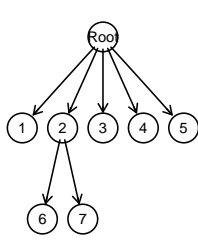

7\_B, DiP-A

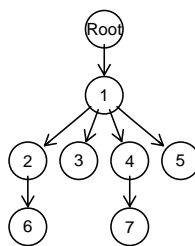

7\_B, OT

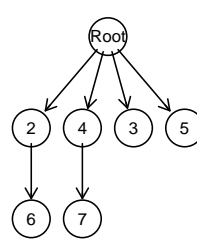

7\_B, OT-A

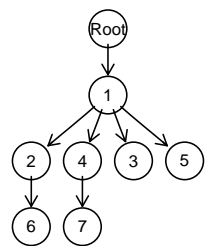

# Filtering = NP. Model = exp

11\_A, CBN

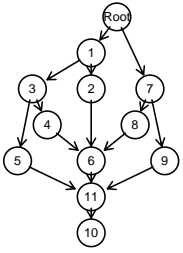

11\_A, CBN-A

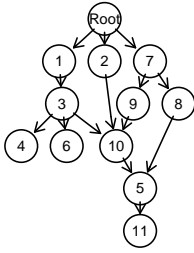

11\_A, DiP

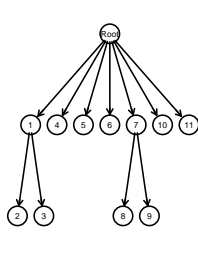

11\_A, DiP-A

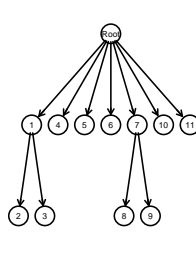

11\_A, OT

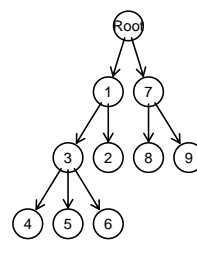

11\_A, OT-A

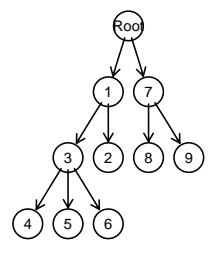

11\_B, CBN

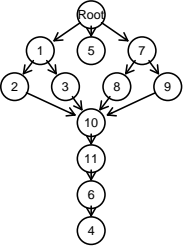

11\_B, CBN-A

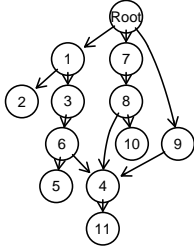

11\_B, DiP

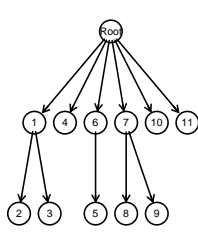

11\_B, DiP-A

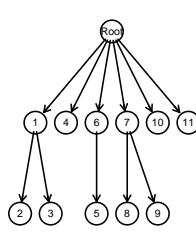

11\_B, OT

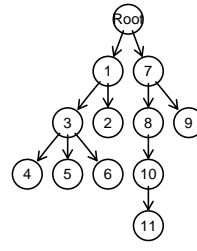

11\_B, OT-A

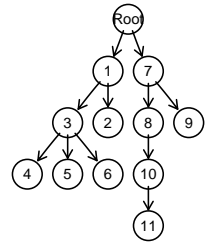

9\_A, CBN

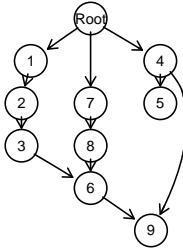

9\_A, CBN-A

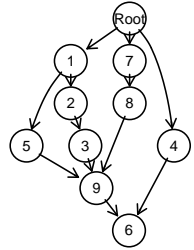

9\_A, DiP

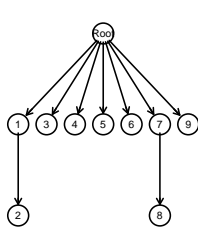

9\_A, DiP-A

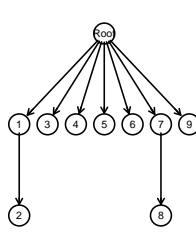

9\_A, OT

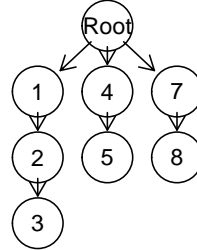

9\_A, OT-A

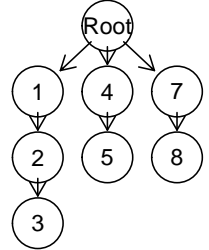

9\_B, CBN

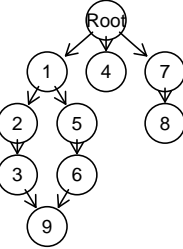

9\_B, CBN-A

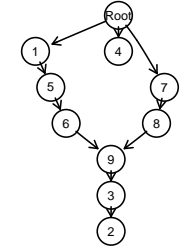

9\_B, DiP

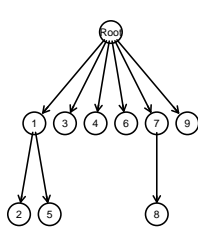

9\_B, DiP-A

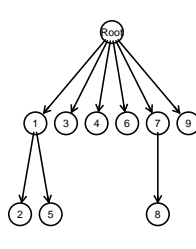

9\_B, OT

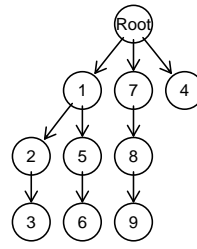

9\_B, OT-A

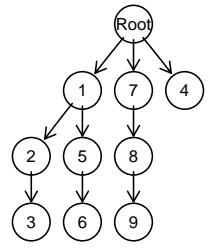

7\_A, CBN

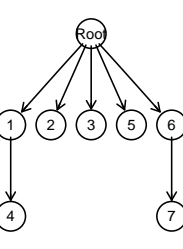

7\_A, CBN-A

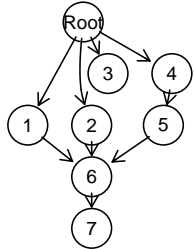

7\_A, DiP

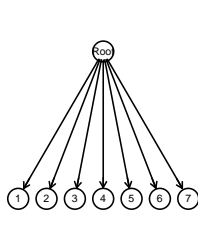

7\_A, DiP-A

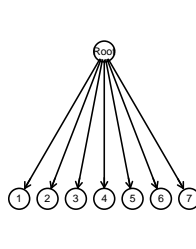

7\_A, OT

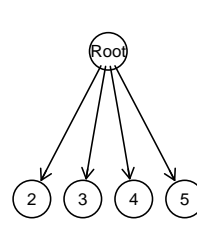

7\_A, OT-A

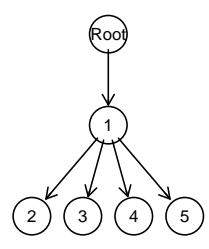

7\_B, CBN

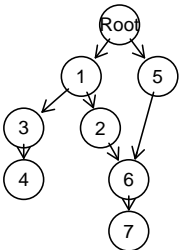

7\_B, CBN-A

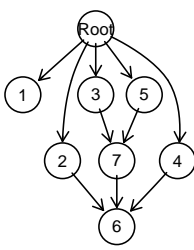

7\_B, DiP

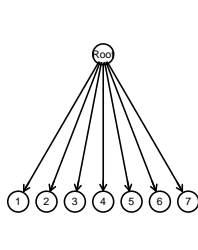

7\_B, DiP-A

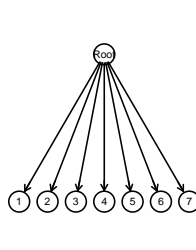

7\_B, OT

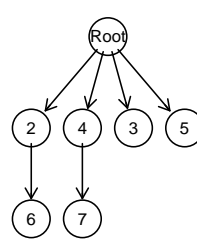

7\_B, OT-A

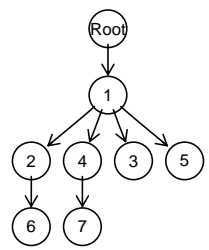

# Filtering = NP. Model = McF\_4

11\_A, CBN

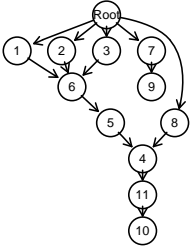

11\_A, CBN-A

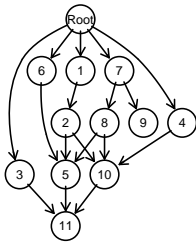

11\_A, DiP

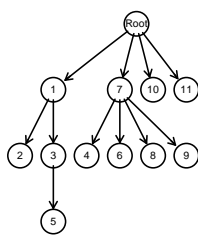

11\_A, DiP-A

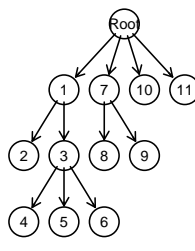

11\_A, OT

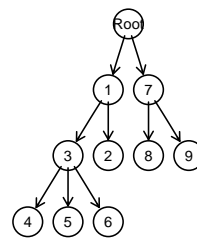

11\_A, OT-A

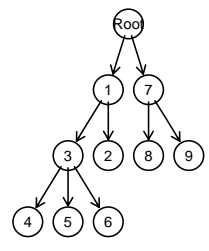

11\_B, CBN

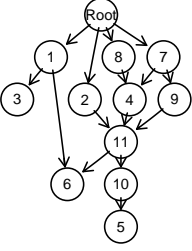

11\_B, CBN-A

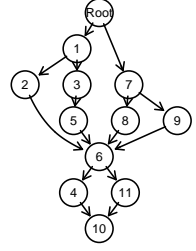

11\_B, DiP

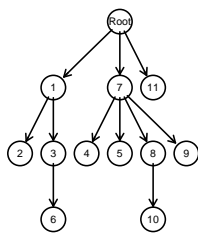

11\_B, DiP-A

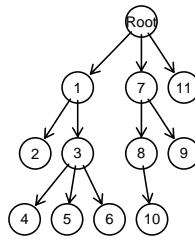

11\_B, OT

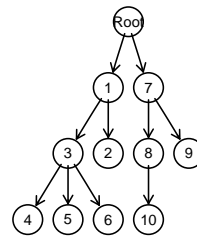

11\_B, OT-A

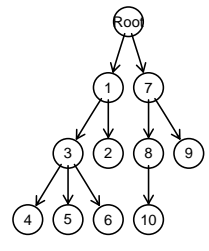

9\_A, CBN

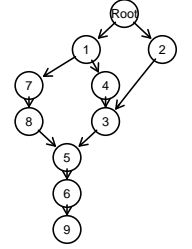

9\_A, CBN-A

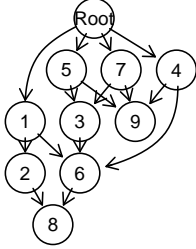

9\_A, DiP

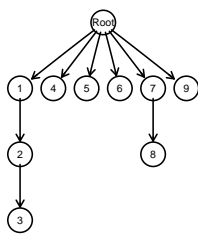

9\_A, DiP-A

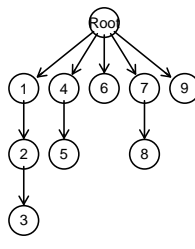

9\_A, OT

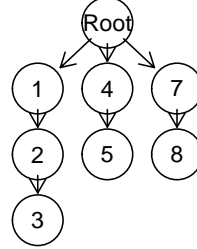

9\_A, OT-A

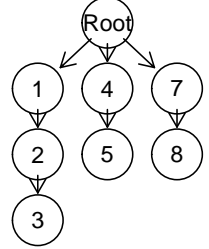

9\_B, CBN

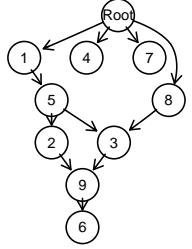

9\_B, CBN-A

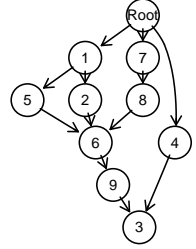

9\_B, DiP

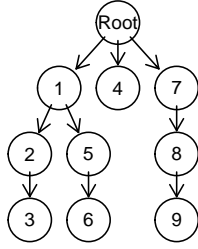

9\_B, DiP-A

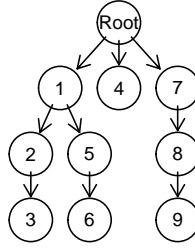

9\_B, OT

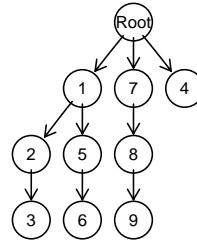

9\_B, OT-A

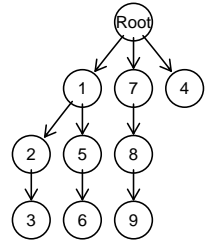

7\_A, CBN

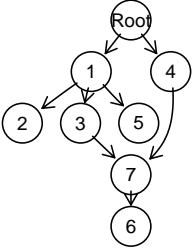

7\_A, CBN-A

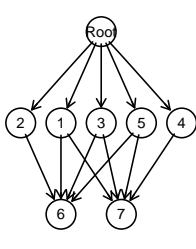

7\_A, DiP

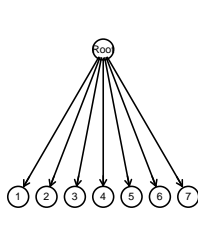

7\_A, DiP-A

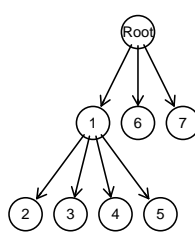

7\_A, OT

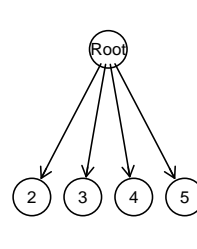

7\_A, OT-A

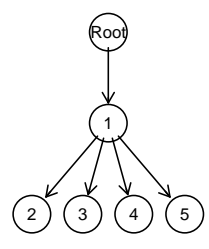

7\_B, CBN

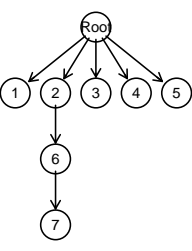

7\_B, CBN-A

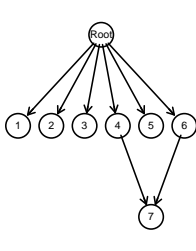

7\_B, DiP

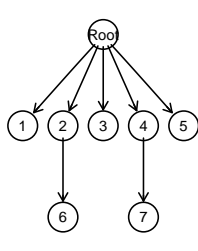

7\_B, DiP-A

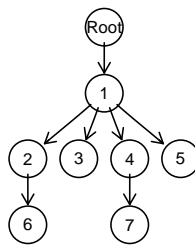

7\_B, OT

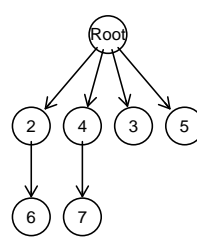

7\_B, OT-A

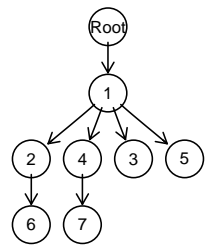

# Filtering = NP. Model = McF\_6

11\_A, CBN

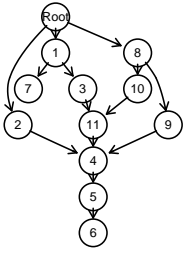

11\_A, CBN-A

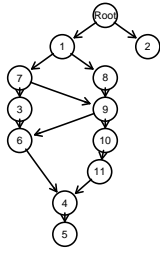

11\_A, DiP

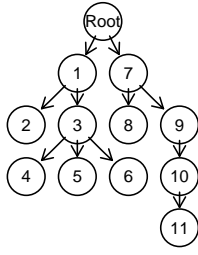

11\_A, DiP-A

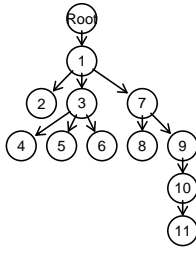

11\_A, OT

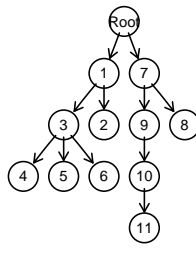

11\_A, OT-A

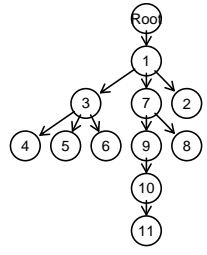

11\_B, CBN

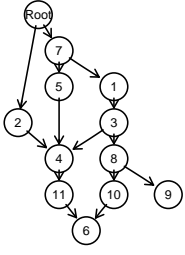

11\_B, CBN-A

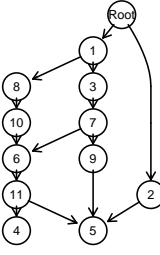

11\_B, DiP

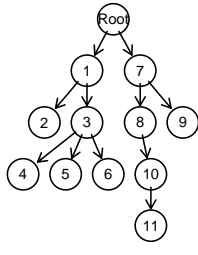

11\_B, DiP-A

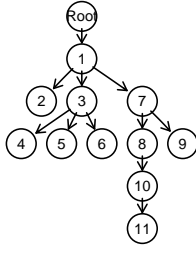

11\_B, OT

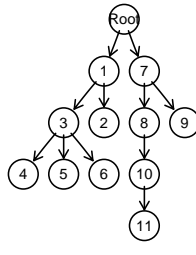

11\_B, OT-A

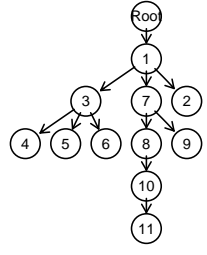

9\_A, CBN

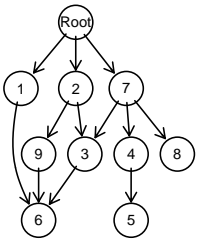

9\_A, CBN-A

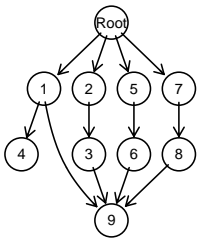

9\_A, DiP

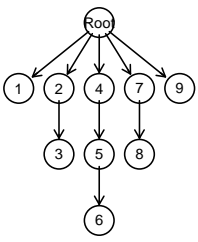

9\_A, DiP-A

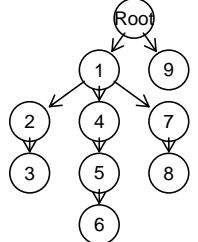

9\_A, OT

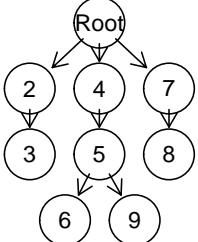

9\_A, OT-A

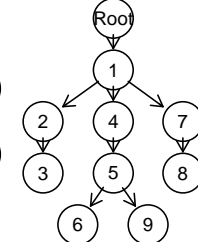

9\_B, CBN

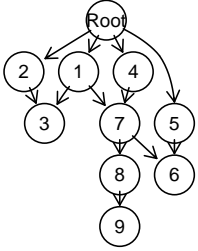

9\_B, CBN-A

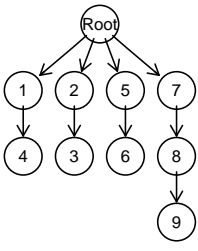

9\_B, DiP

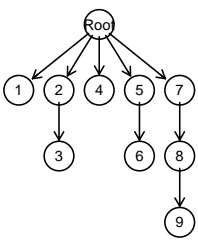

9\_B, DiP-A

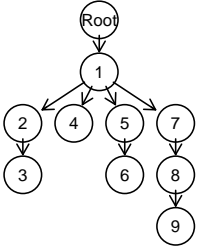

9\_B, OT

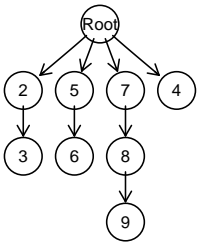

9\_B, OT-A

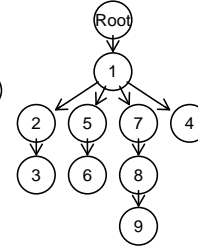

7\_A, CBN

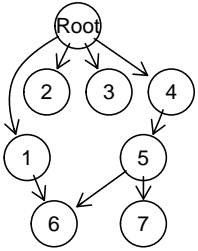

7\_A, CBN-A

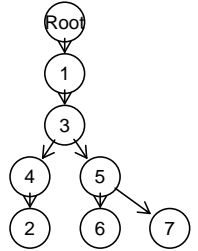

7\_A, DiP

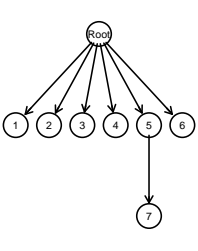

7\_A, DiP-A

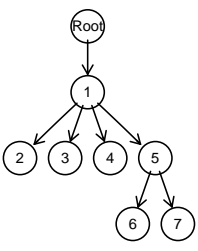

7\_A, OT

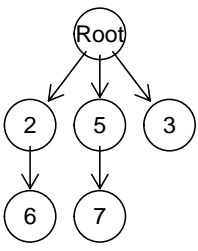

7\_A, OT-A

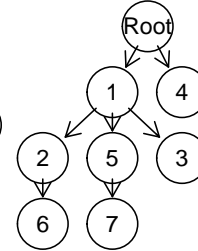

7\_B, CBN

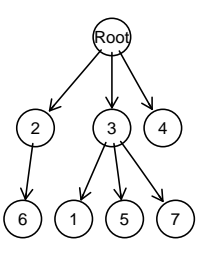

7\_B, CBN-A

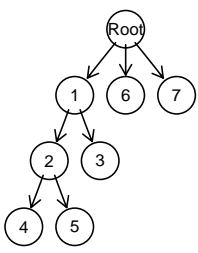

7\_B, DiP

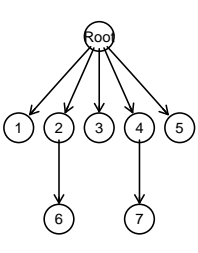

7\_B, DiP-A

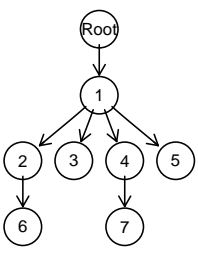

7\_B, OT

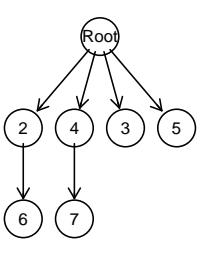

7\_B, OT-A

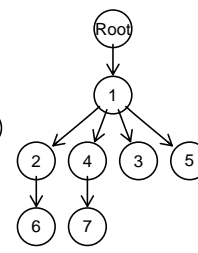

**3 Drivers Unknown: Filtering = S1**

# Filtering = S1. Model = Bozic

11\_A, CBN

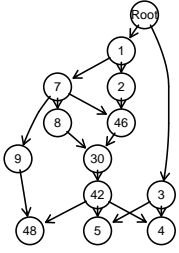

11\_A, CBN-A

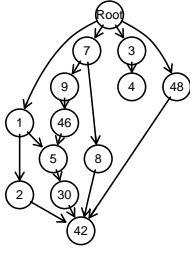

11\_A, DiP

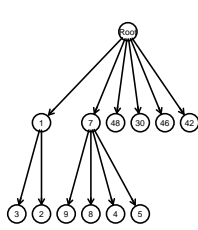

11\_A, DiP-A

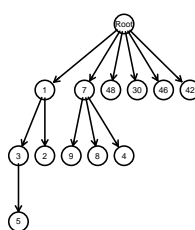

11\_A, OT

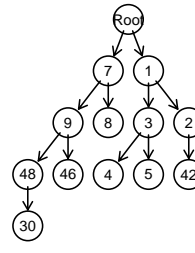

11\_A, OT-A

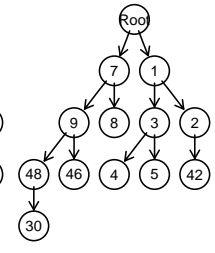

11\_B, CBN

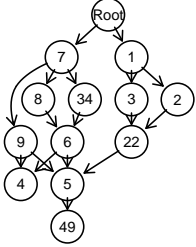

11\_B, CBN-A

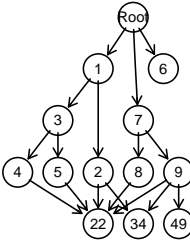

11\_B, DiP

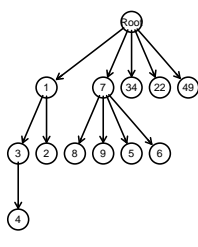

11\_B, DiP-A

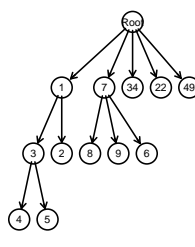

11\_B, OT

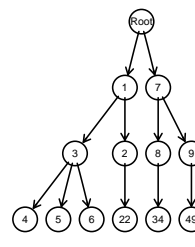

11\_B, OT-A

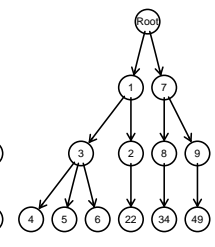

9\_A, CBN

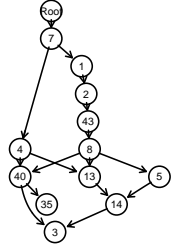

9\_A, CBN-A

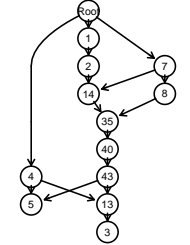

9\_A, DiP

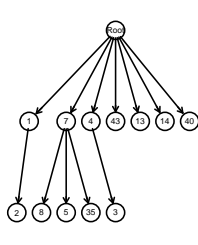

9\_A, DiP-A

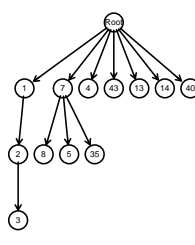

9\_A, OT

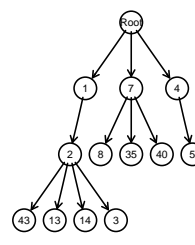

9\_A, OT-A

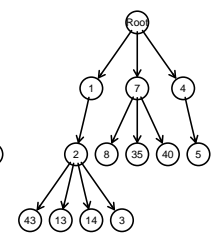

9\_B, CBN

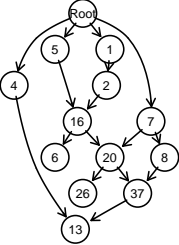

9\_B, CBN-A

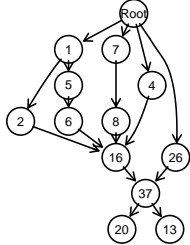

9\_B, DiP

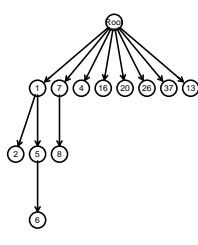

9\_B, DiP-A

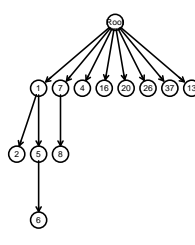

9\_B, OT

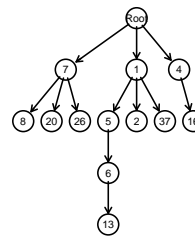

9\_B, OT-A

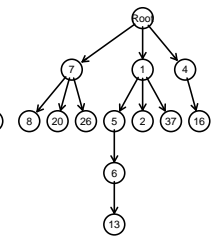

7\_A, CBN

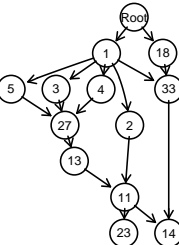

7\_A, CBN-A

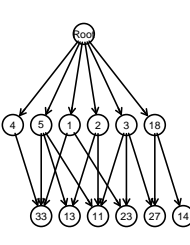

7\_A, DiP

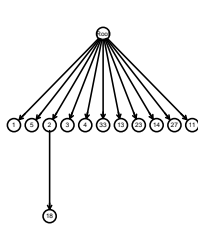

7\_A, DiP-A

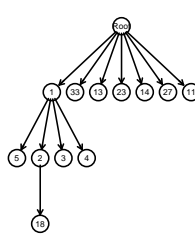

7\_A, OT

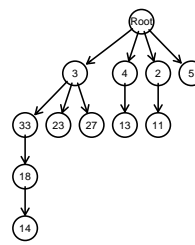

7\_A, OT-A

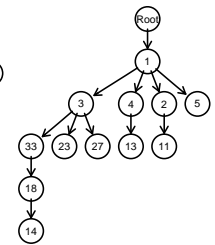

7\_B, CBN

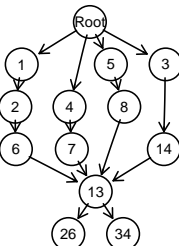

7\_B, CBN-A

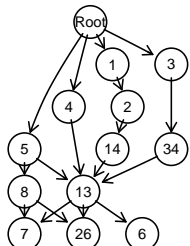

7\_B, DiP

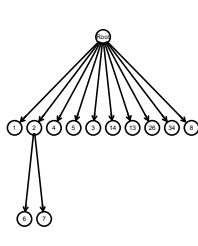

7\_B, DiP-A

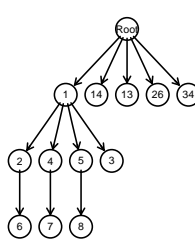

7\_B, OT

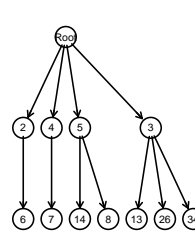

7\_B, OT-A

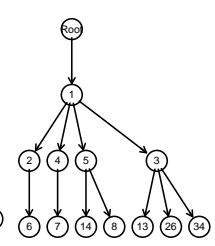



# Filtering = S1. Model = exp

11\_A, CBN

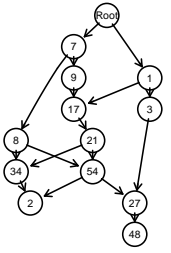

11\_A, CBN-A

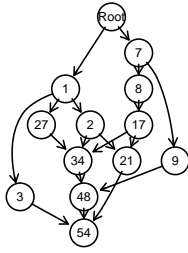

11\_A, DiP

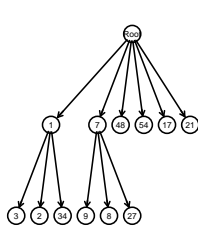

11\_A, DiP-A

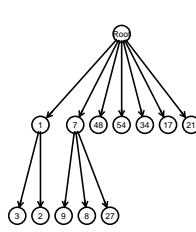

11\_A, OT

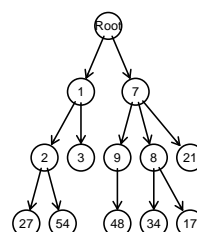

11\_A, OT-A

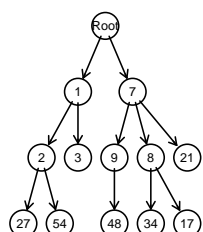

11\_B, CBN

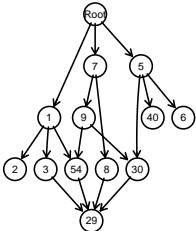

11\_B, CBN-A

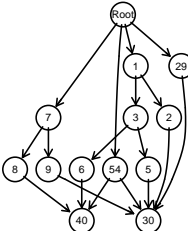

11\_B, DiP

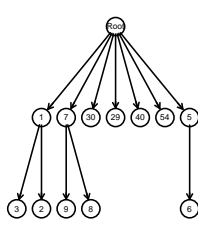

11\_B, DiP-A

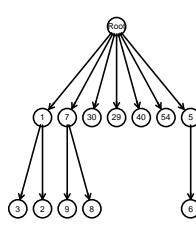

11\_B, OT

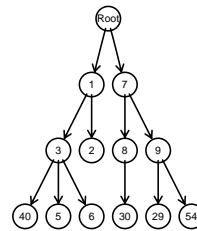

11\_B, OT-A

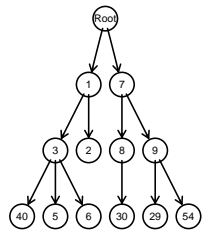

9\_A, CBN

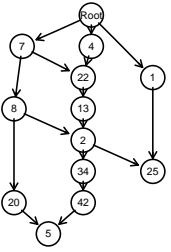

9\_A, CBN-A

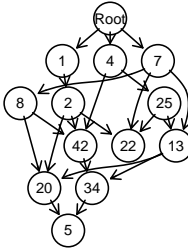

9\_A, DiP

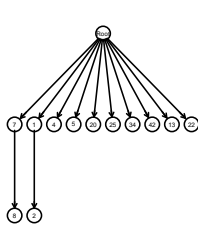

9\_A, DiP-A

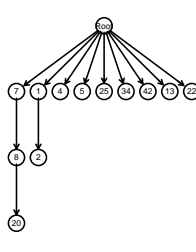

9\_A, OT

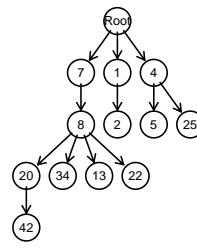

9\_A, OT-A

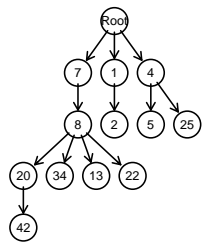

9\_B, CBN

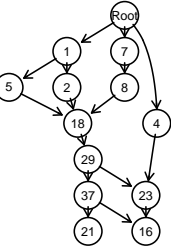

9\_B, CBN-A

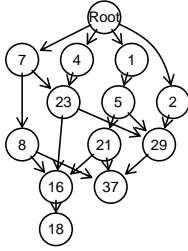

9\_B, DiP

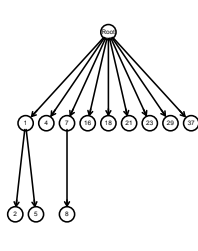

9\_B, DiP-A

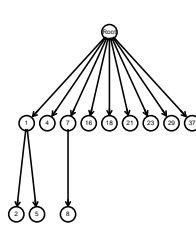

9\_B, OT

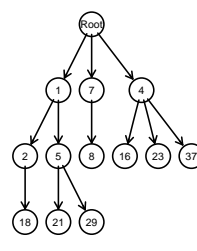

9\_B, OT-A

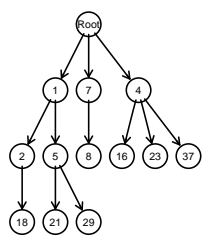

7\_A, CBN

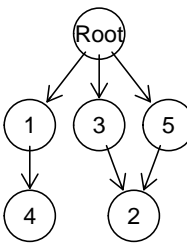

7\_A, CBN-A

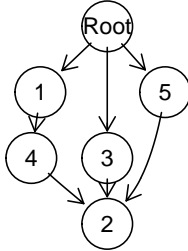

7\_A, DiP

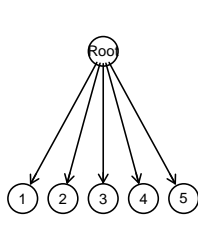

7\_A, DiP-A

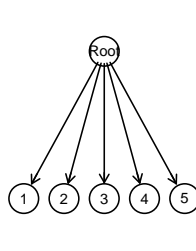

7\_A, OT

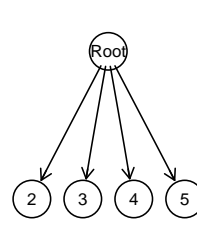

7\_A, OT-A

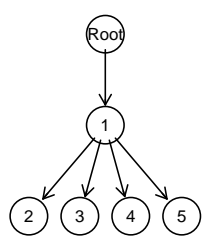

7\_B, CBN

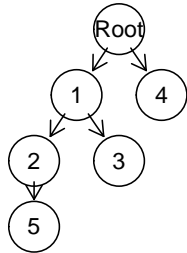

7\_B, CBN-A

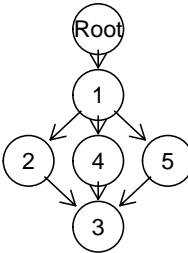

7\_B, DiP

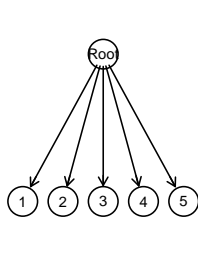

7\_B, DiP-A

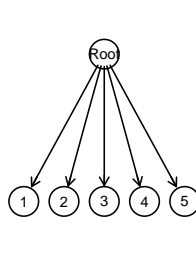

7\_B, OT

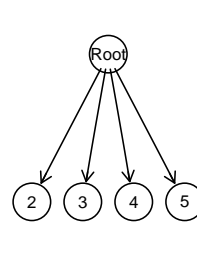

7\_B, OT-A

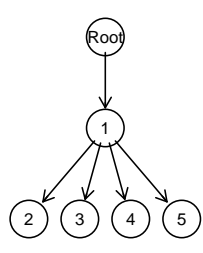

# Filtering = S1. Model = McF\_4

11\_A, CBN

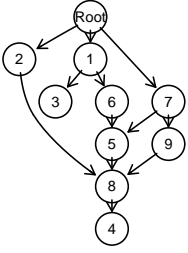

11\_A, CBN-A

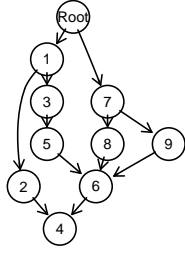

11\_A, DiP

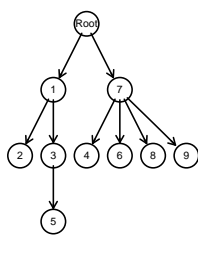

11\_A, DiP-A

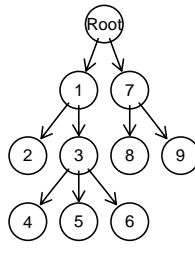

11\_A, OT

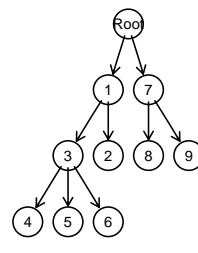

11\_A, OT-A

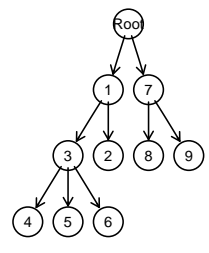

11\_B, CBN

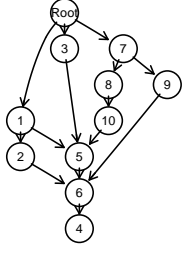

11\_B, CBN-A

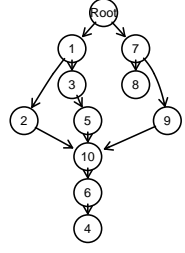

11\_B, DiP

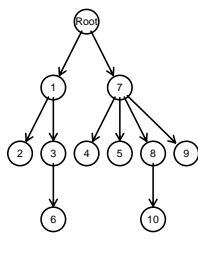

11\_B, DiP-A

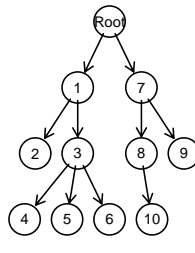

11\_B, OT

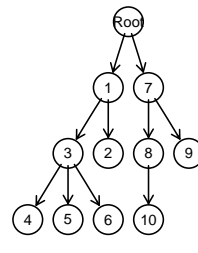

11\_B, OT-A

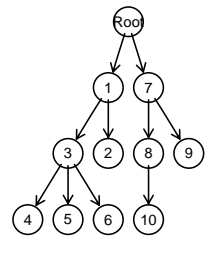

9\_A, CBN

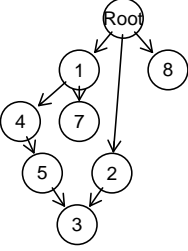

9\_A, CBN-A

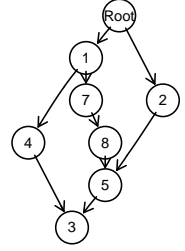

9\_A, DiP

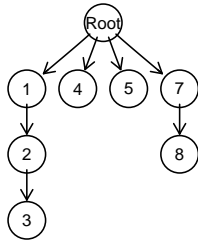

9\_A, DiP-A

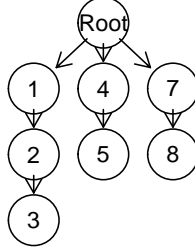

9\_A, OT

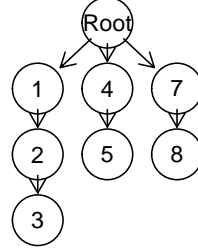

9\_A, OT-A

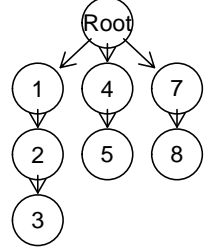

9\_B, CBN

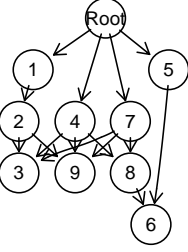

9\_B, CBN-A

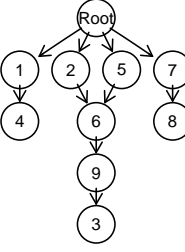

9\_B, DiP

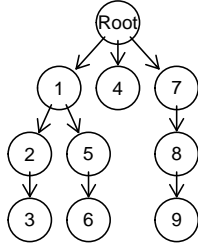

9\_B, DiP-A

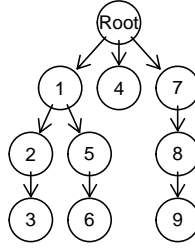

9\_B, OT

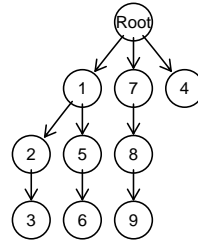

9\_B, OT-A

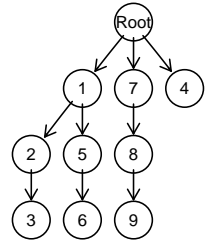

7\_A, CBN

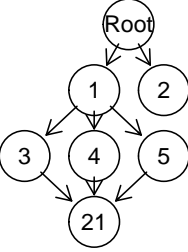

7\_A, CBN-A

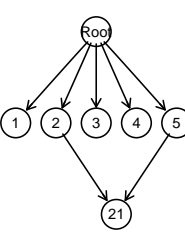

7\_A, DiP

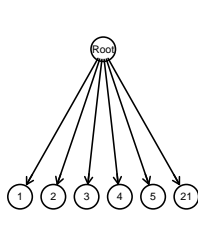

7\_A, DiP-A

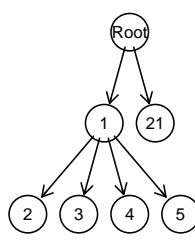

7\_A, OT

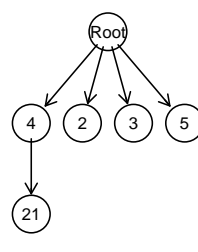

7\_A, OT-A

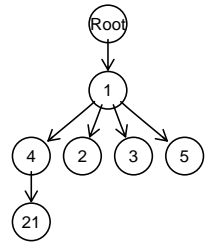

7\_B, CBN

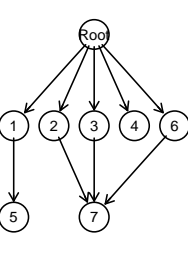

7\_B, CBN-A

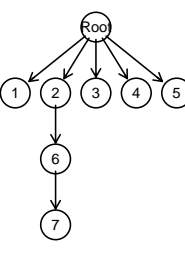

7\_B, DiP

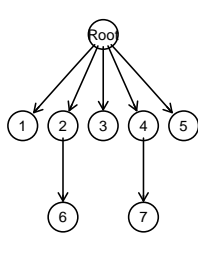

7\_B, DiP-A

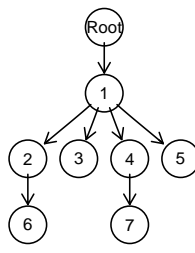

7\_B, OT

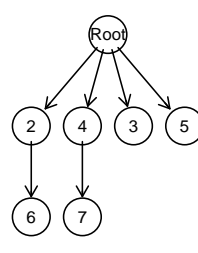

7\_B, OT-A

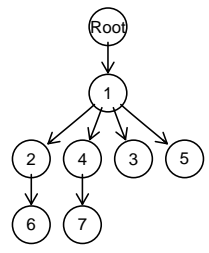

# Filtering = S1. Model = McF\_6

11\_A, CBN

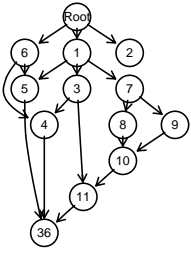

11\_A, CBN-A

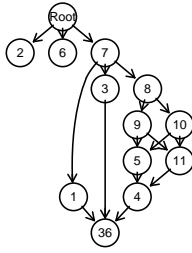

11\_A, DiP

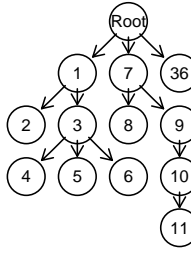

11\_A, DiP-A

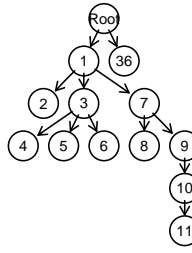

11\_A, OT

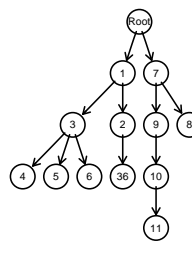

11\_A, OT-A

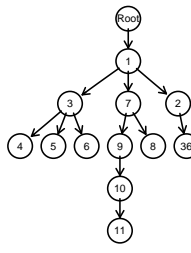

11\_B, CBN

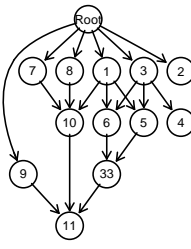

11\_B, CBN-A

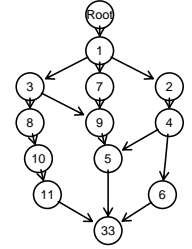

11\_B, DiP

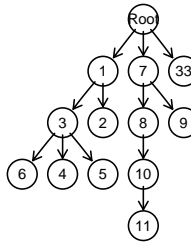

11\_B, DiP-A

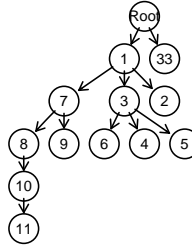

11\_B, OT

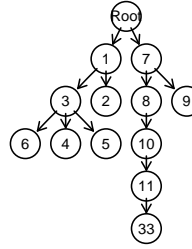

11\_B, OT-A

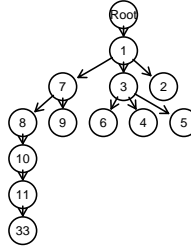

9\_A, CBN

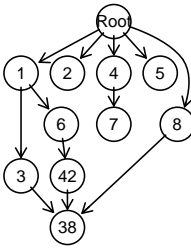

9\_A, CBN-A

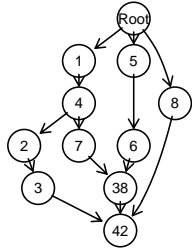

9\_A, DiP

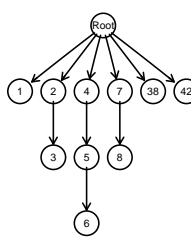

9\_A, DiP-A

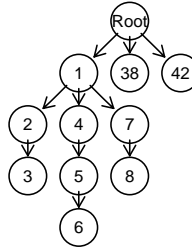

9\_A, OT

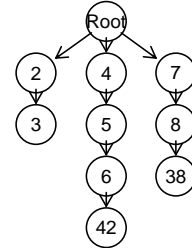

9\_A, OT-A

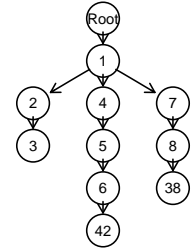

9\_B, CBN

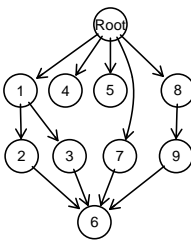

9\_B, CBN-A

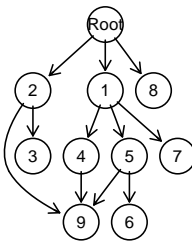

9\_B, DiP

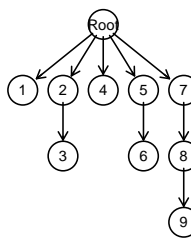

9\_B, DiP-A

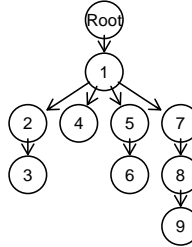

9\_B, OT

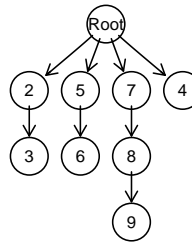

9\_B, OT-A

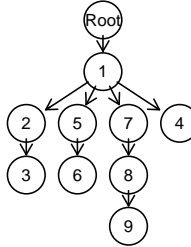

7\_A, CBN

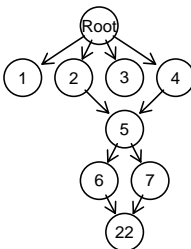

7\_A, CBN-A

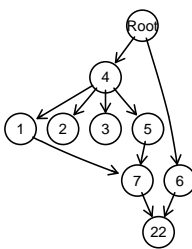

7\_A, DiP

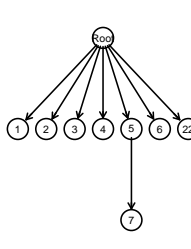

7\_A, DiP-A

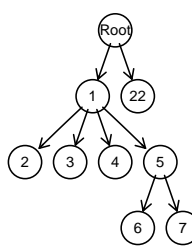

7\_A, OT

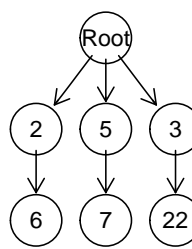

7\_A, OT-A

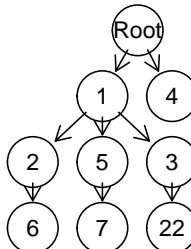

7\_B, CBN

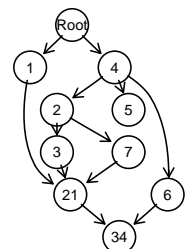

7\_B, CBN-A

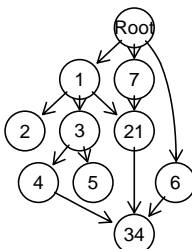

7\_B, DiP

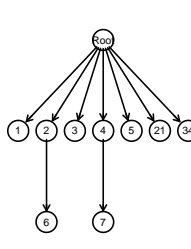

7\_B, DiP-A

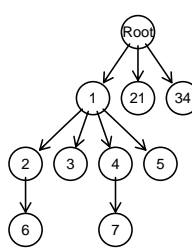

7\_B, OT

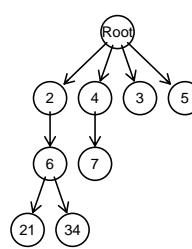

7\_B, OT-A

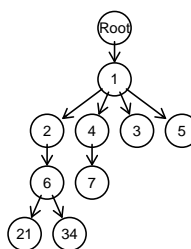

#### 4 Drivers Unknown: Filtering = S5

# Filtering = S5. Model = Bozic

11\_A, CBN

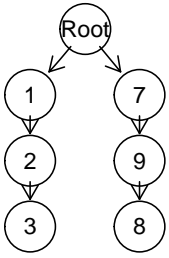

11\_A, CBN-A

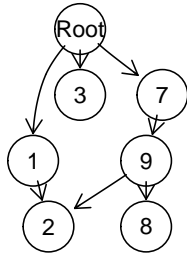

11\_A, DiP

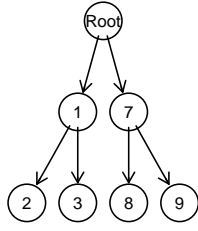

11\_A, DiP-A

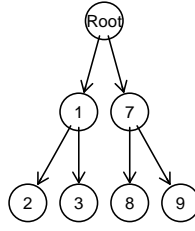

11\_A, OT

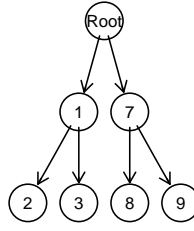

11\_A, OT-A

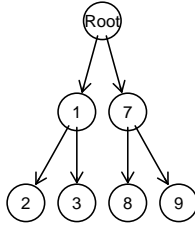

11\_B, CBN

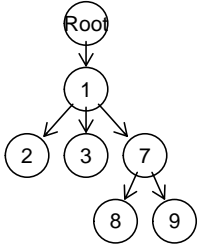

11\_B, CBN-A

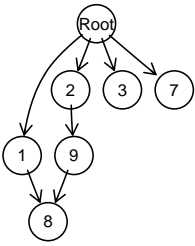

11\_B, DiP

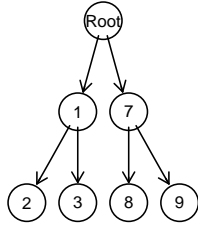

11\_B, DiP-A

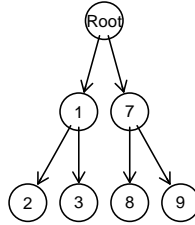

11\_B, OT

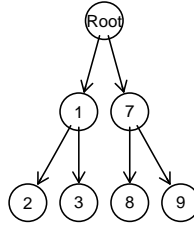

11\_B, OT-A

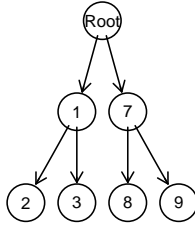

9\_A, CBN

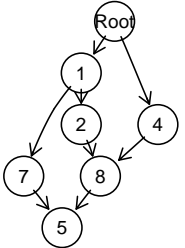

9\_A, CBN-A

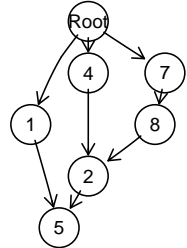

9\_A, DiP

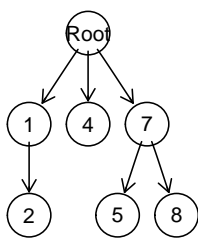

9\_A, DiP-A

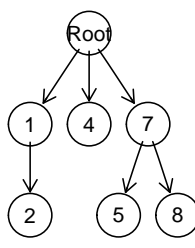

9\_A, OT

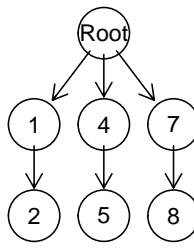

9\_A, OT-A

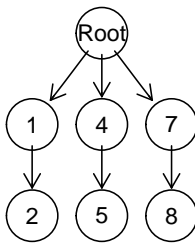

9\_B, CBN

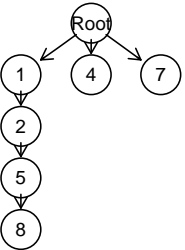

9\_B, CBN-A

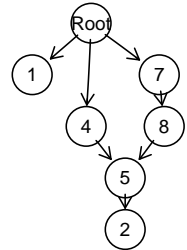

9\_B, DiP

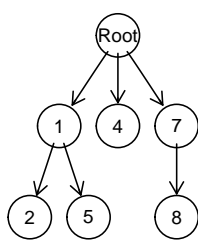

9\_B, DiP-A

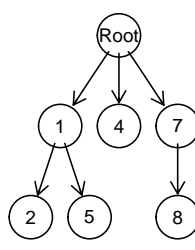

9\_B, OT

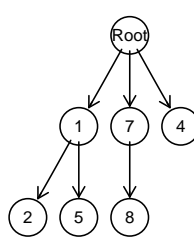

9\_B, OT-A

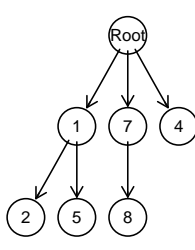

7\_A, CBN

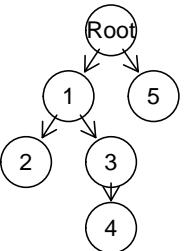

7\_A, CBN-A

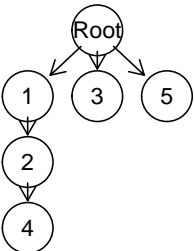

7\_A, DiP

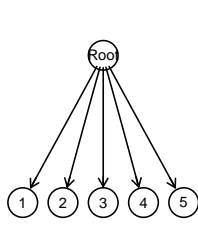

7\_A, DiP-A

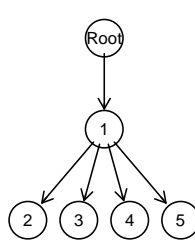

7\_A, OT

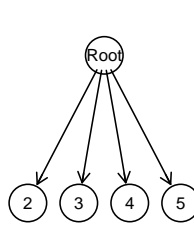

7\_A, OT-A

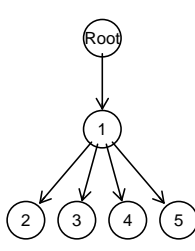

7\_B, CBN

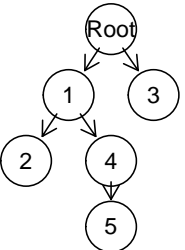

7\_B, CBN-A

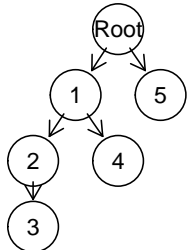

7\_B, DiP

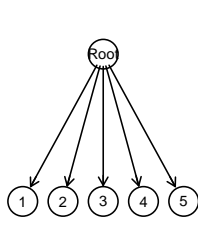

7\_B, DiP-A

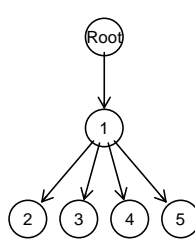

7\_B, OT

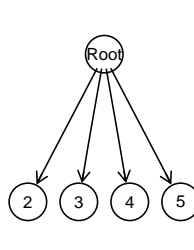

7\_B, OT-A

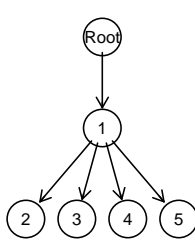



# Filtering = S5. Model = McF\_4

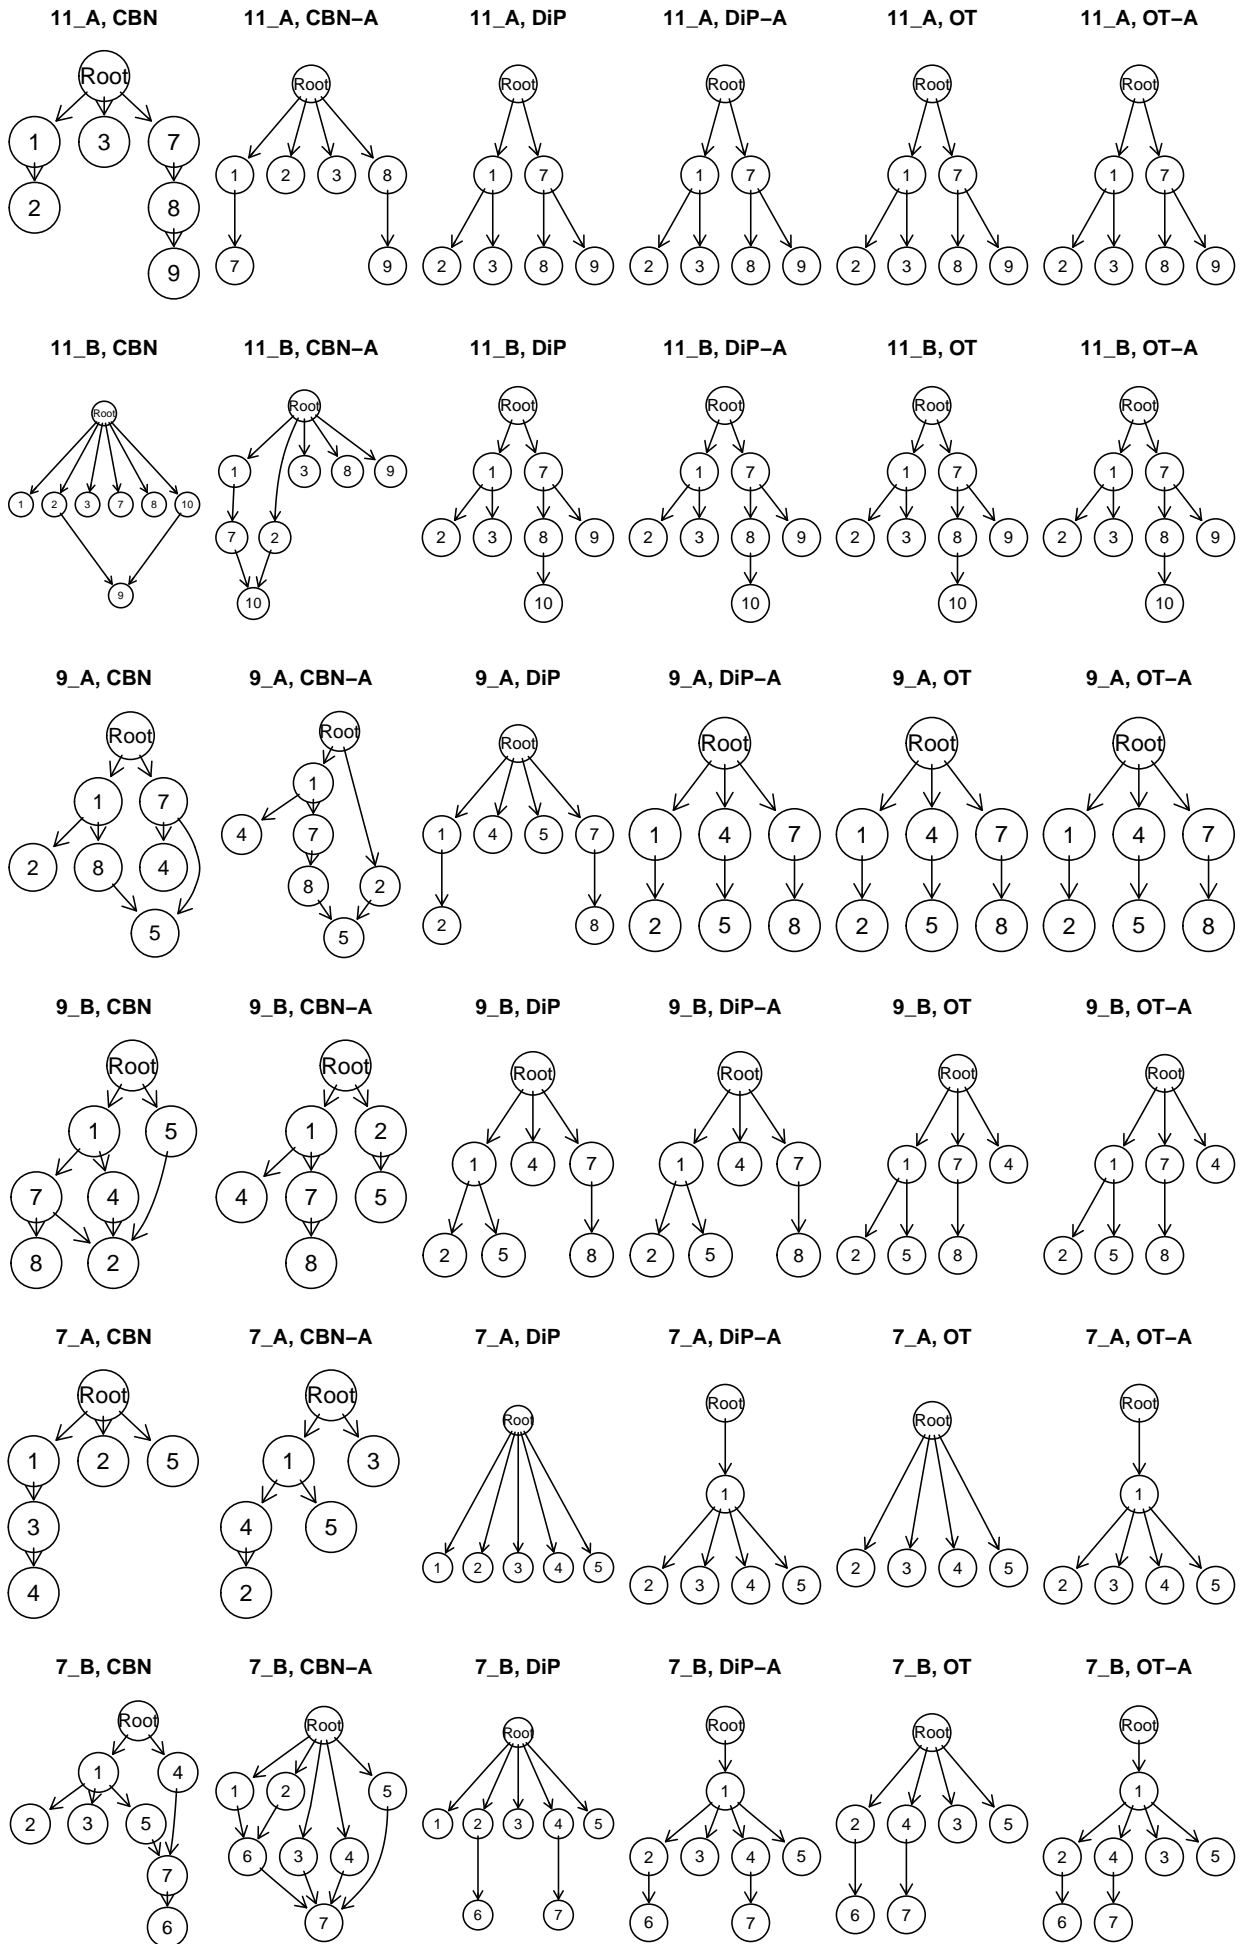

# Filtering = S5. Model = McF\_6

11\_A, CBN

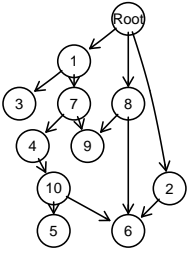

11\_A, CBN-A

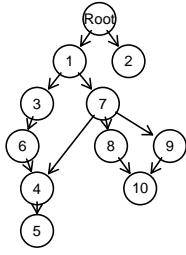

11\_A, DiP

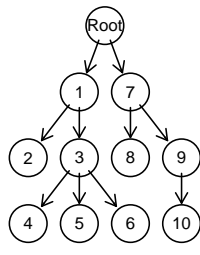

11\_A, DiP-A

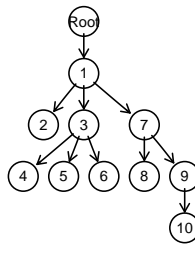

11\_A, OT

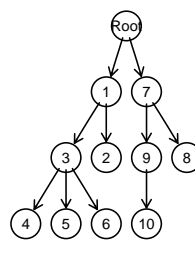

11\_A, OT-A

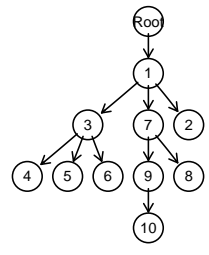

11\_B, CBN

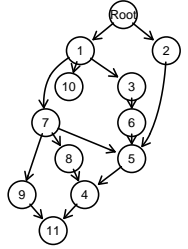

11\_B, CBN-A

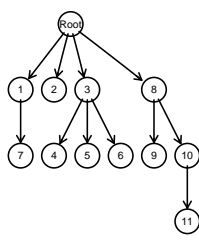

11\_B, DiP

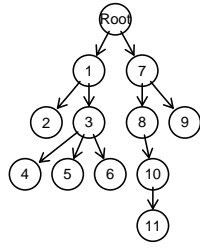

11\_B, DiP-A

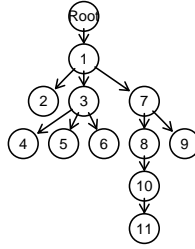

11\_B, OT

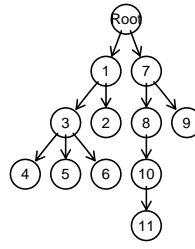

11\_B, OT-A

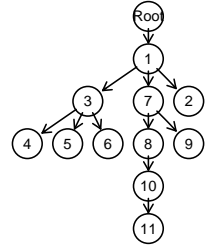

9\_A, CBN

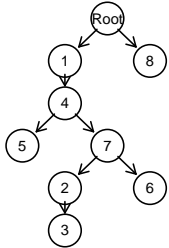

9\_A, CBN-A

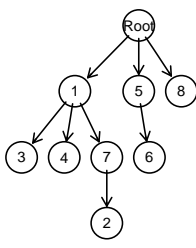

9\_A, DiP

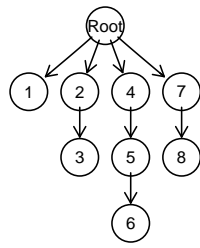

9\_A, DiP-A

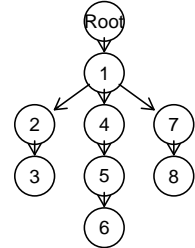

9\_A, OT

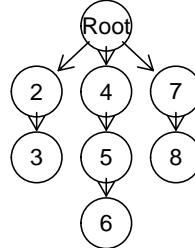

9\_A, OT-A

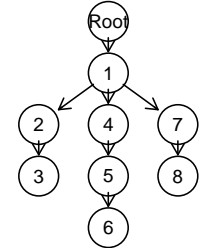

9\_B, CBN

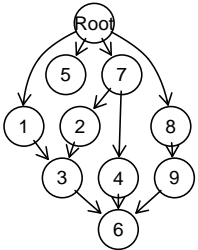

9\_B, CBN-A

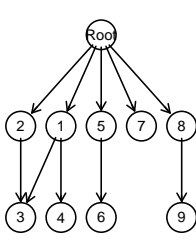

9\_B, DiP

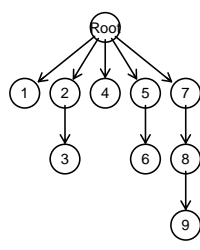

9\_B, DiP-A

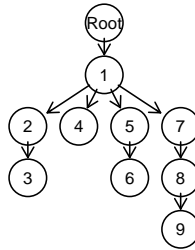

9\_B, OT

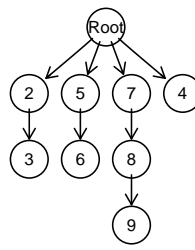

9\_B, OT-A

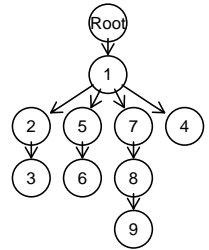

7\_A, CBN

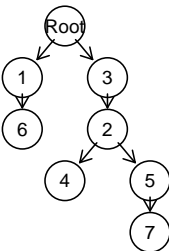

7\_A, CBN-A

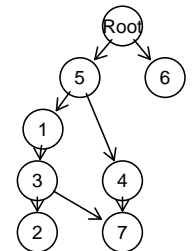

7\_A, DiP

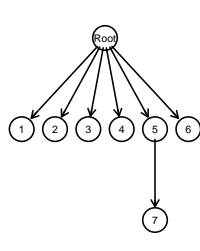

7\_A, DiP-A

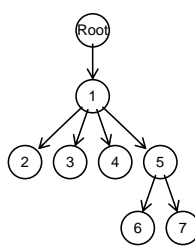

7\_A, OT

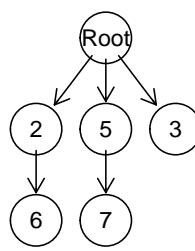

7\_A, OT-A

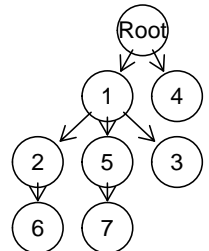

7\_B, CBN

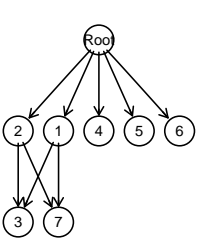

7\_B, CBN-A

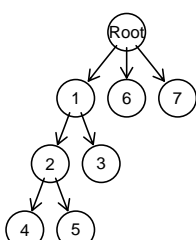

7\_B, DiP

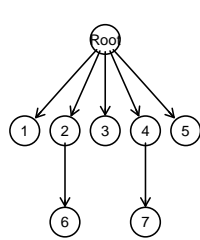

7\_B, DiP-A

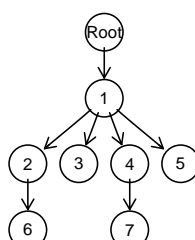

7\_B, OT

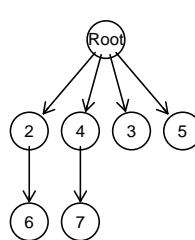

7\_B, OT-A

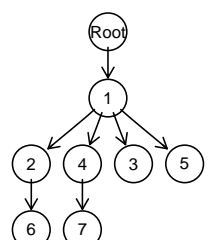



**5 Drivers Unknown: Filtering = J1**

# Filtering = J1. Model = Bozic

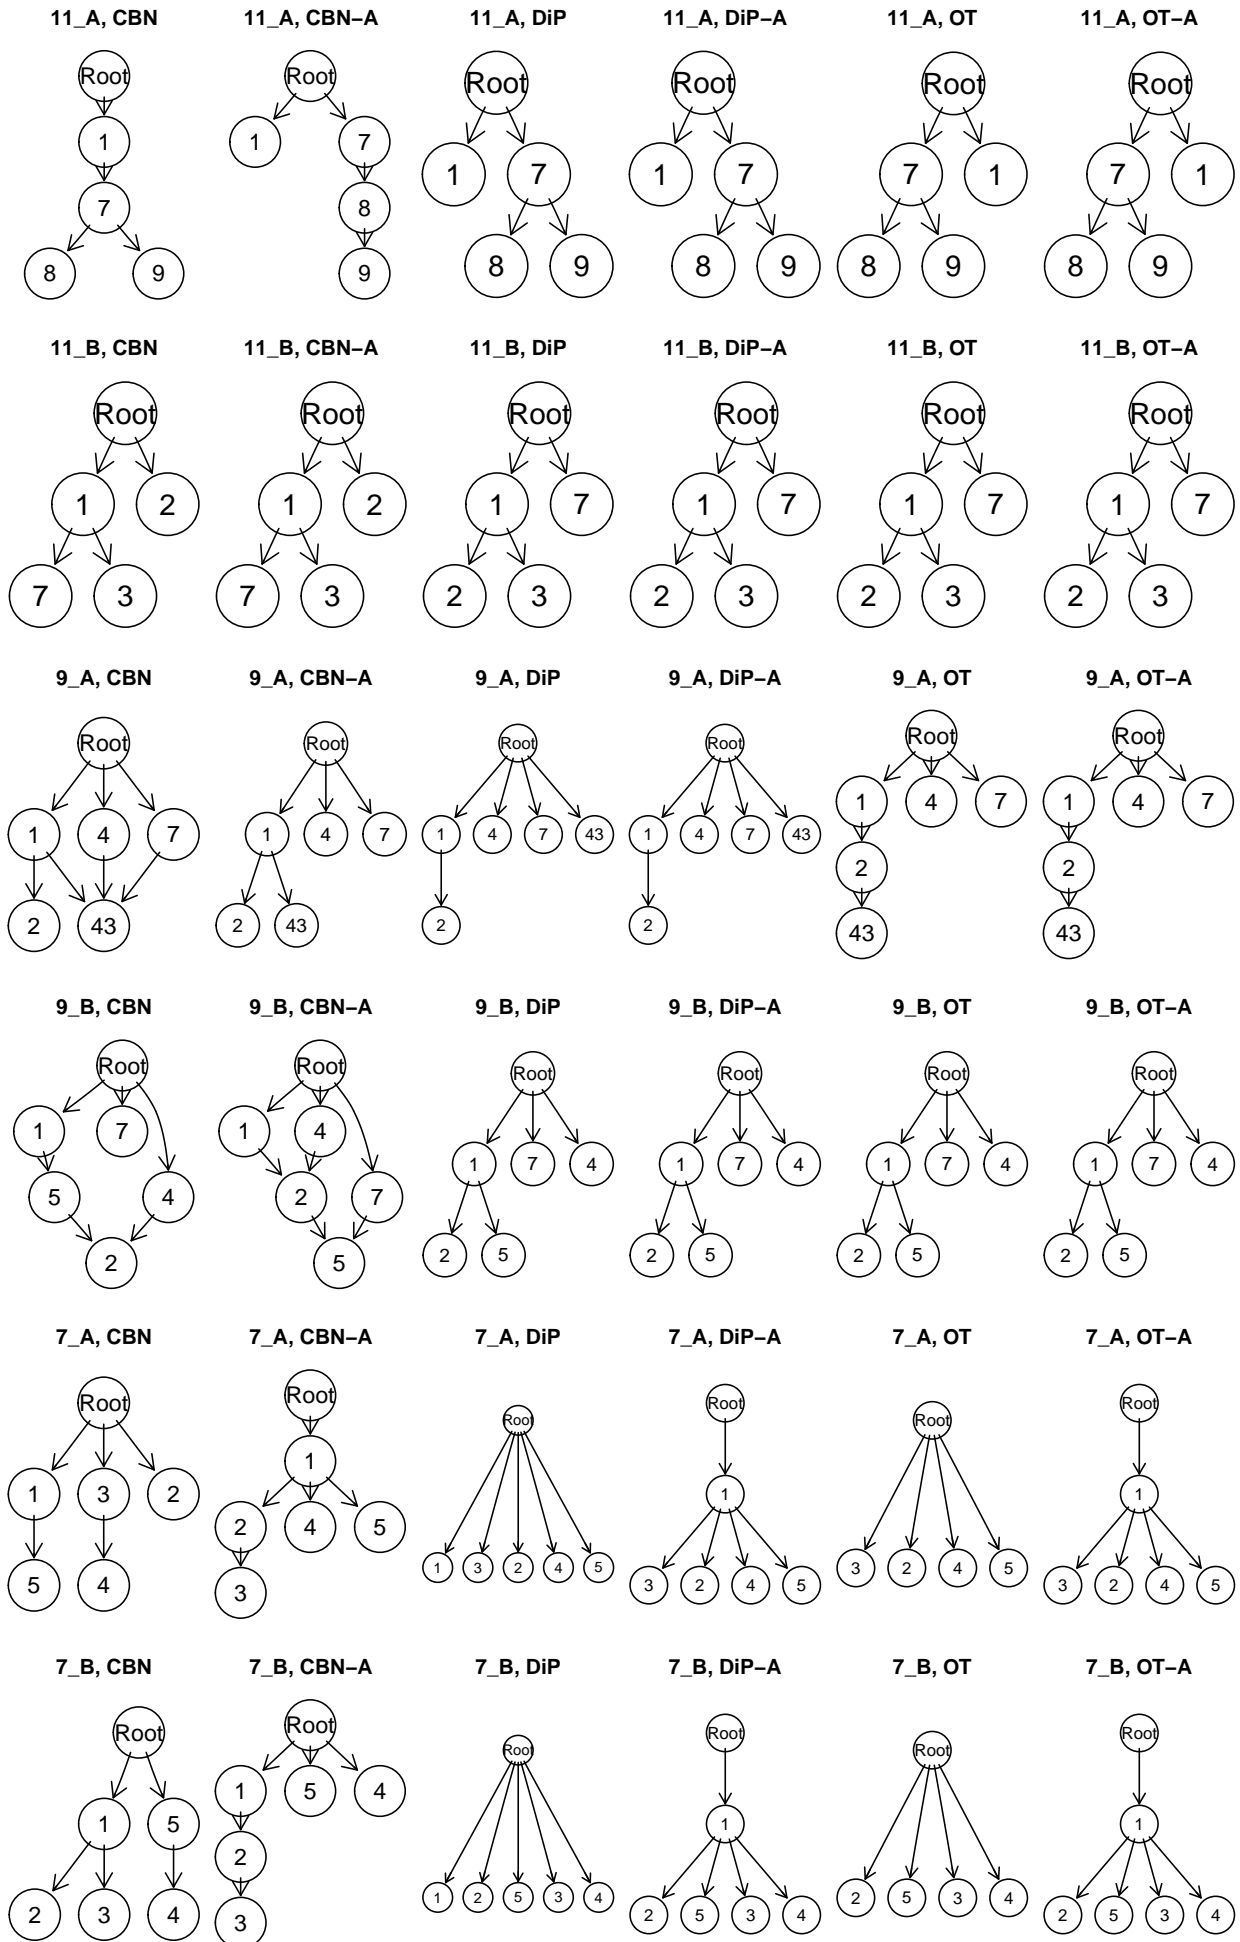

# Filtering = J1. Model = exp

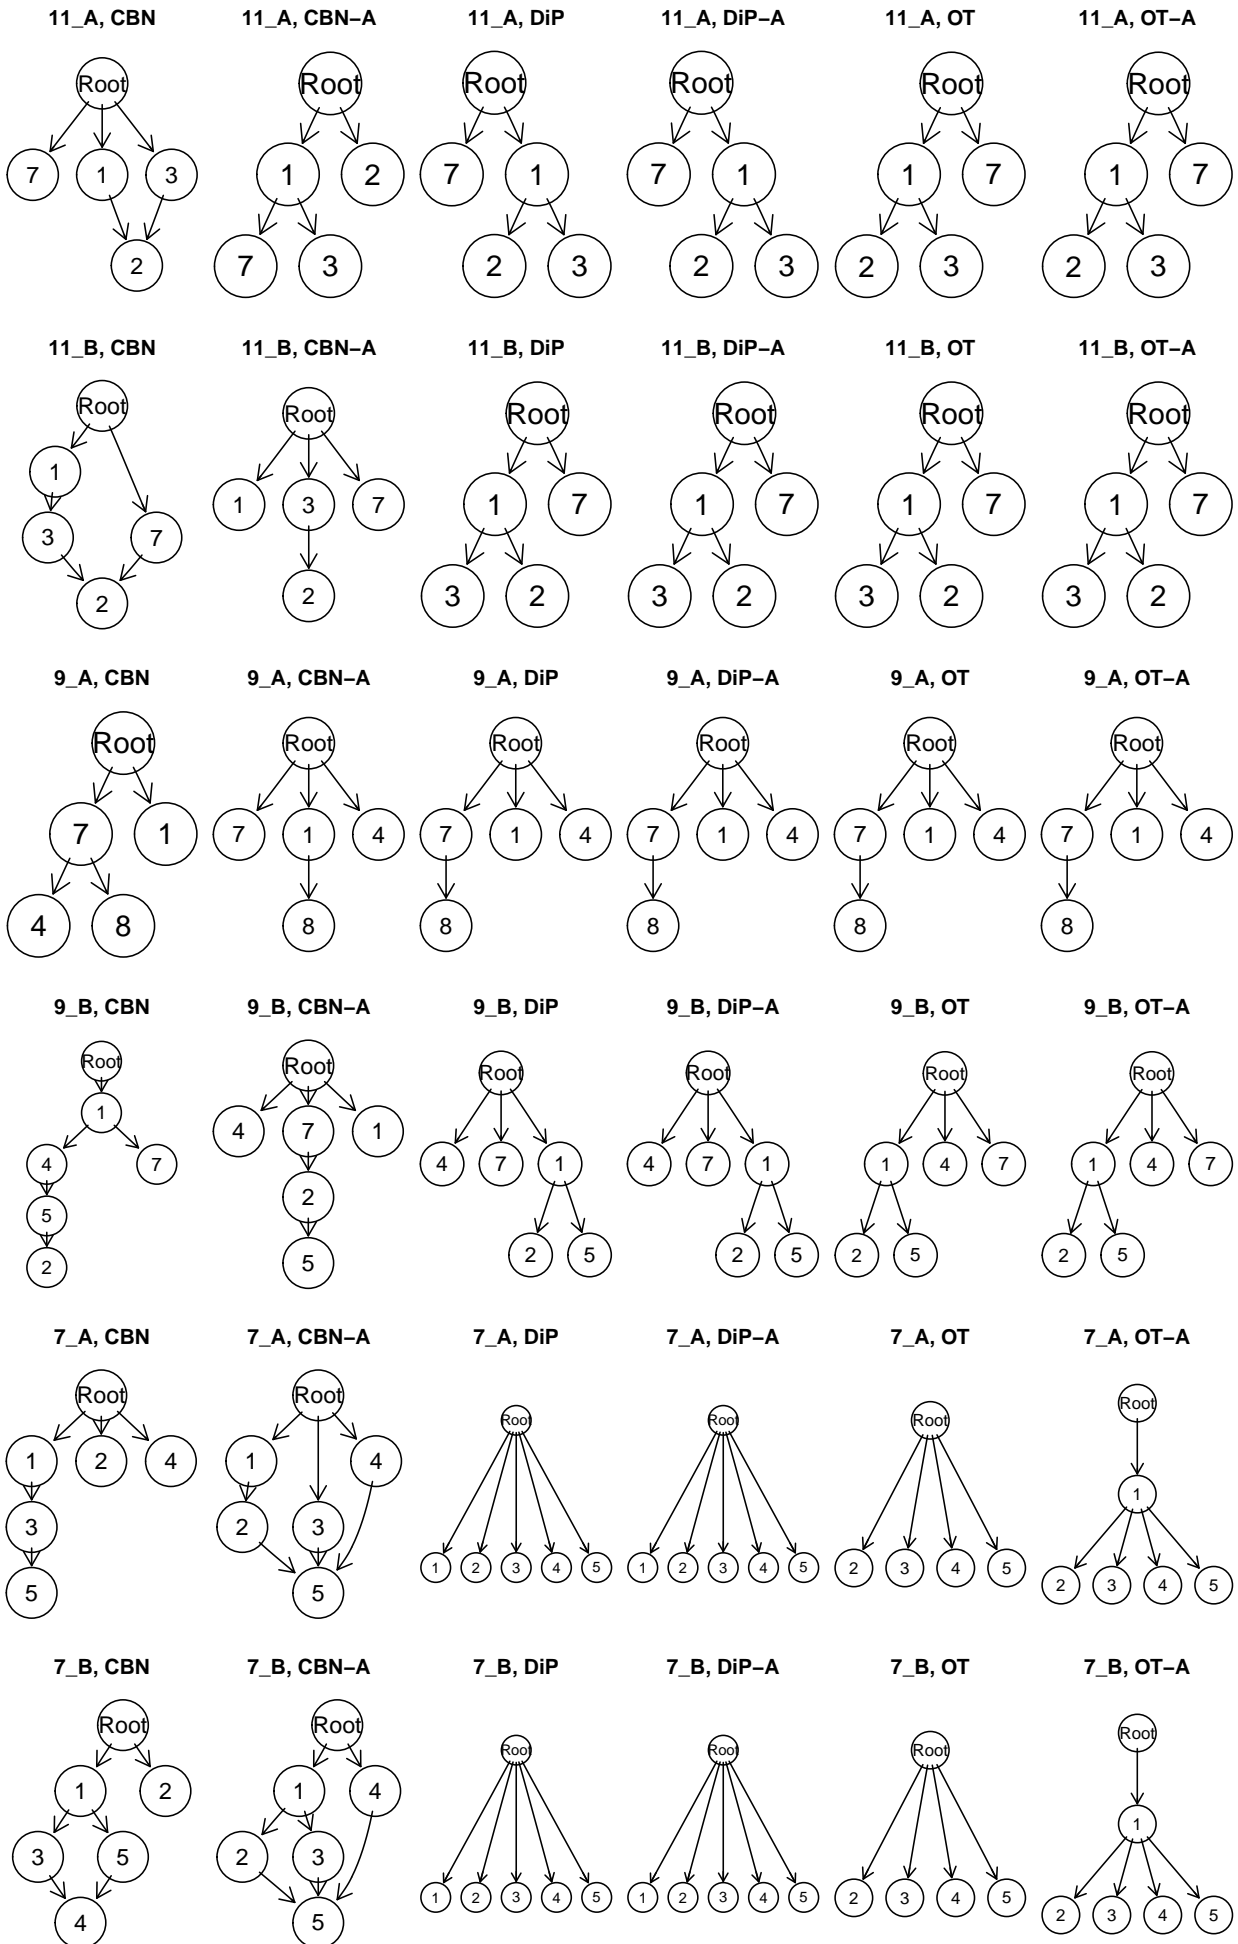

# Filtering = J1. Model = McF\_4

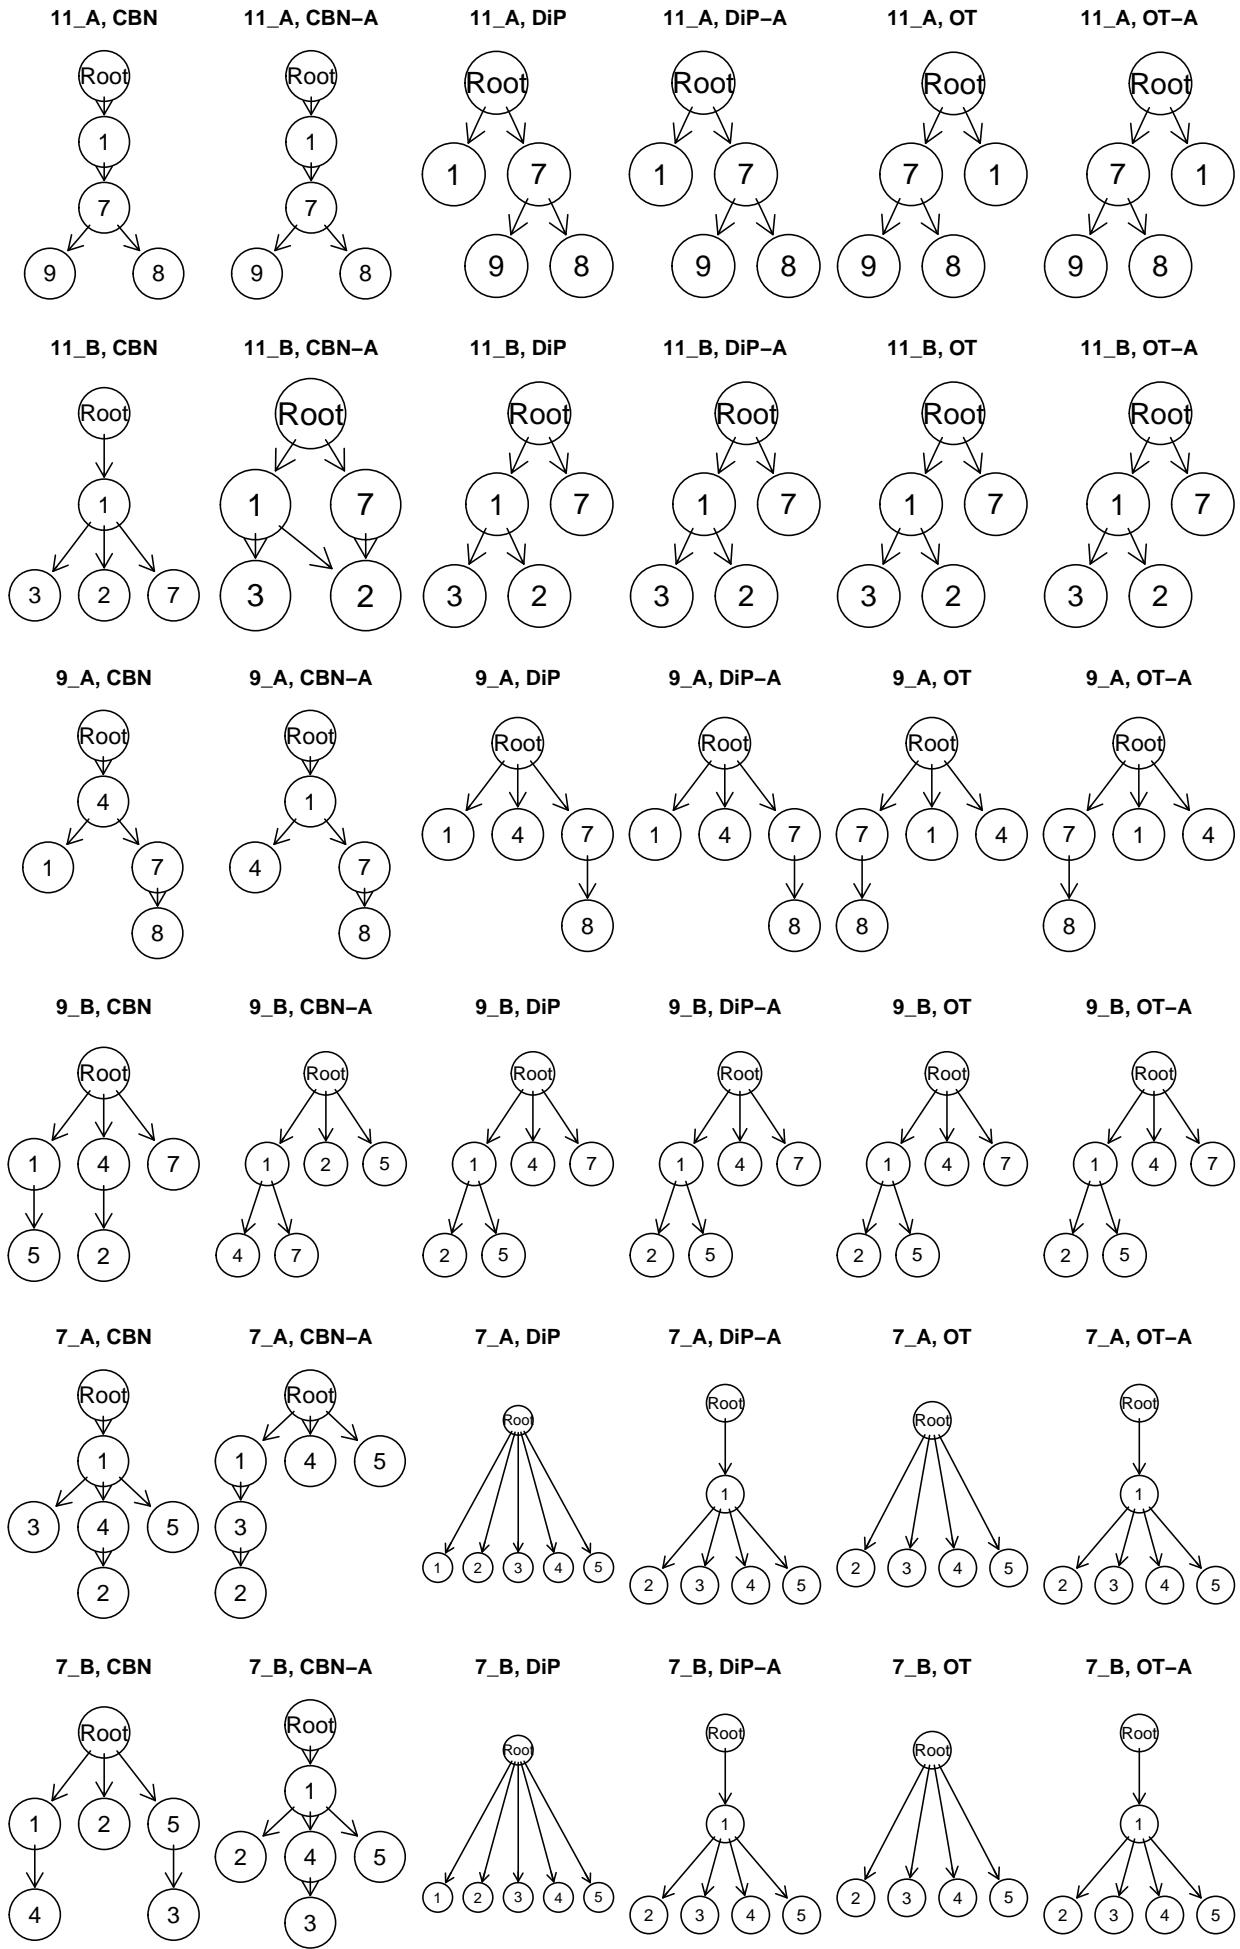



**6 Drivers Unknown: Filtering = J5**

# Filtering = J5. Model = Bozic

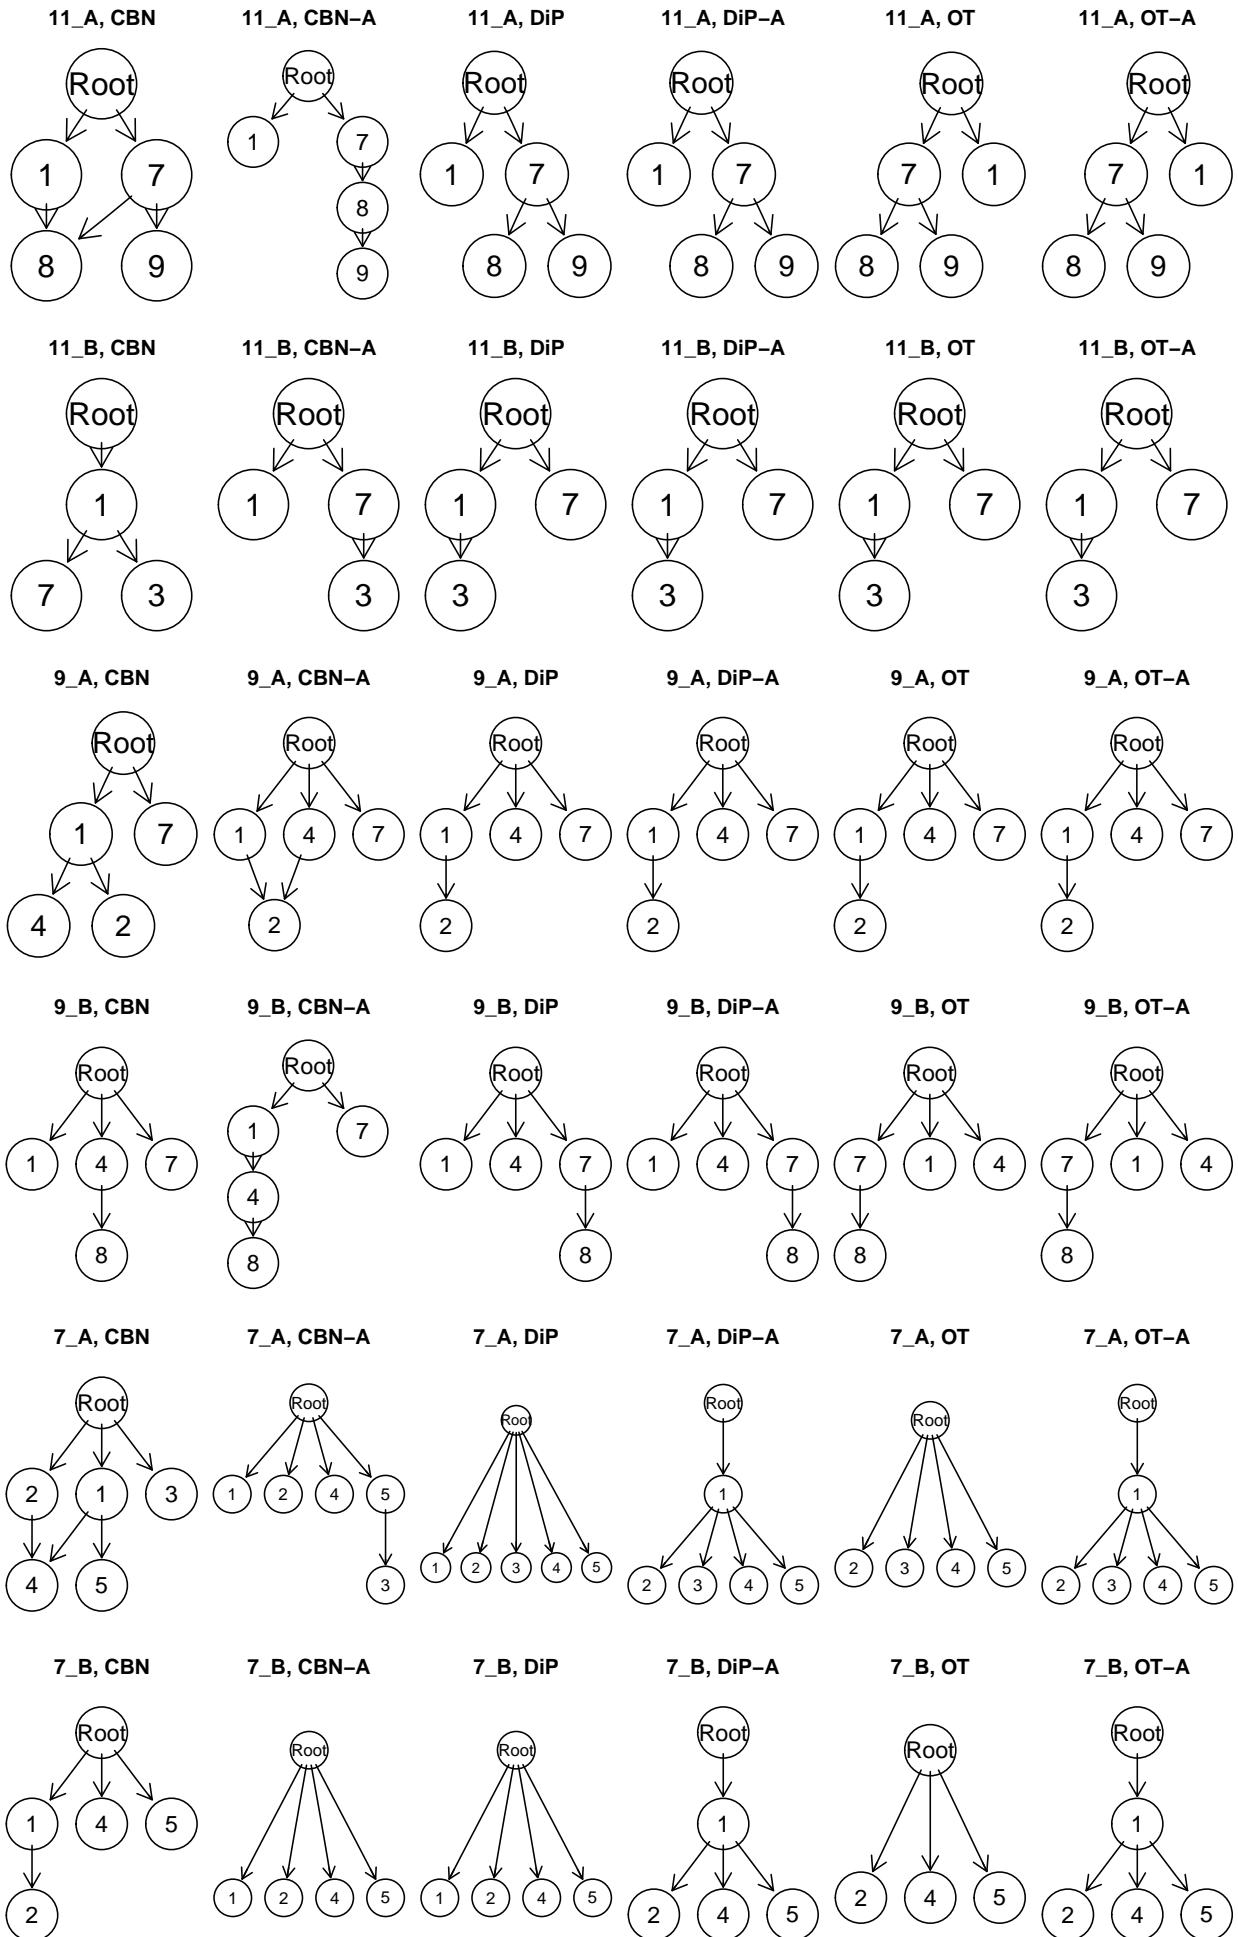

# Filtering = J5. Model = exp

11\_A, CBN

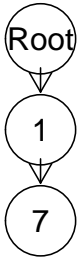

11\_A, CBN-A

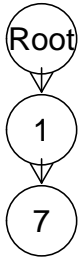

11\_A, DiP

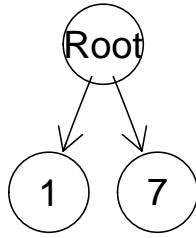

11\_A, DiP-A

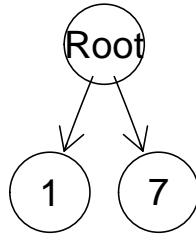

11\_A, OT

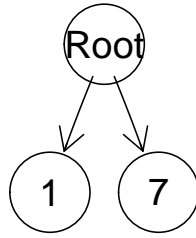

11\_A, OT-A

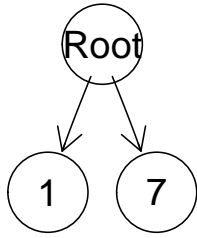

11\_B, CBN

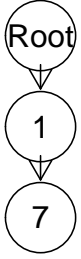

11\_B, CBN-A

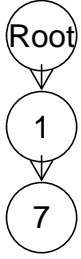

11\_B, DiP

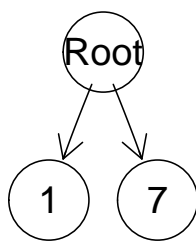

11\_B, DiP-A

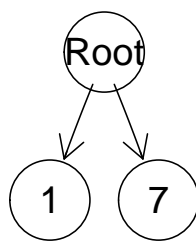

11\_B, OT

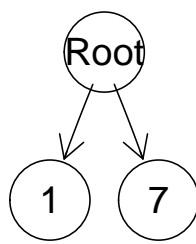

11\_B, OT-A

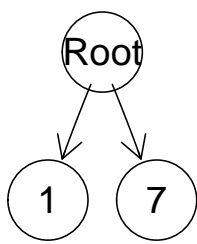

9\_A, CBN

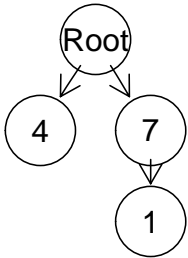

9\_A, CBN-A

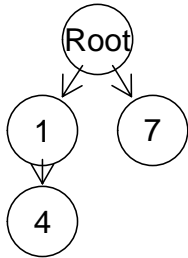

9\_A, DiP

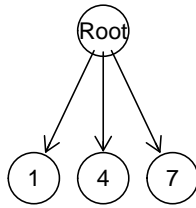

9\_A, DiP-A

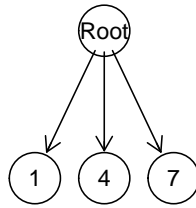

9\_A, OT

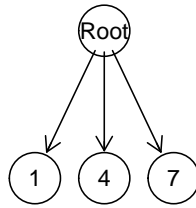

9\_A, OT-A

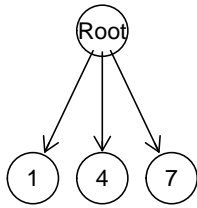

9\_B, CBN

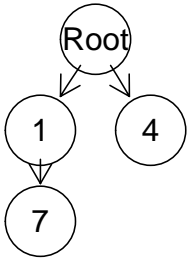

9\_B, CBN-A

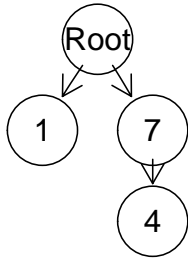

9\_B, DiP

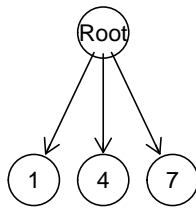

9\_B, DiP-A

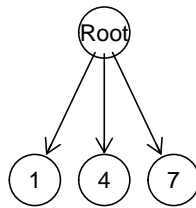

9\_B, OT

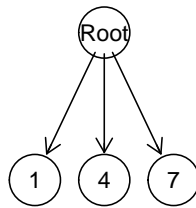

9\_B, OT-A

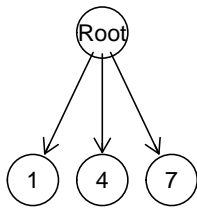

7\_A, CBN

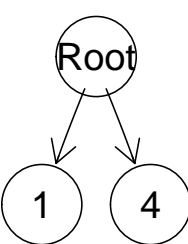

7\_A, CBN-A

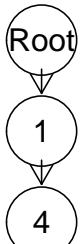

7\_A, DiP

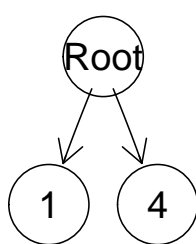

7\_A, DiP-A

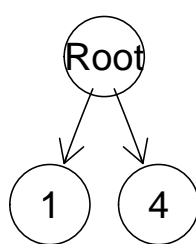

7\_A, OT

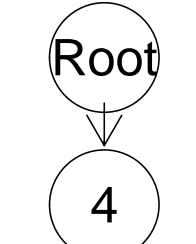

7\_A, OT-A

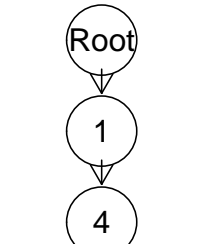

7\_B, CBN

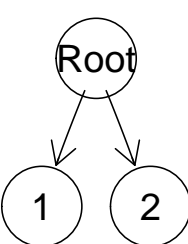

7\_B, CBN-A

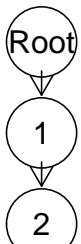

7\_B, DiP

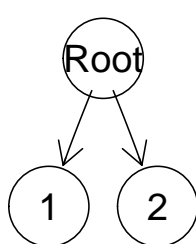

7\_B, DiP-A

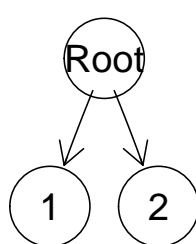

7\_B, OT

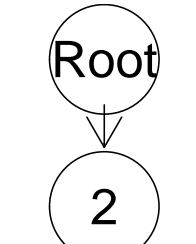

7\_B, OT-A

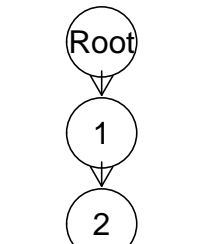



# Filtering = J5. Model = McF\_4

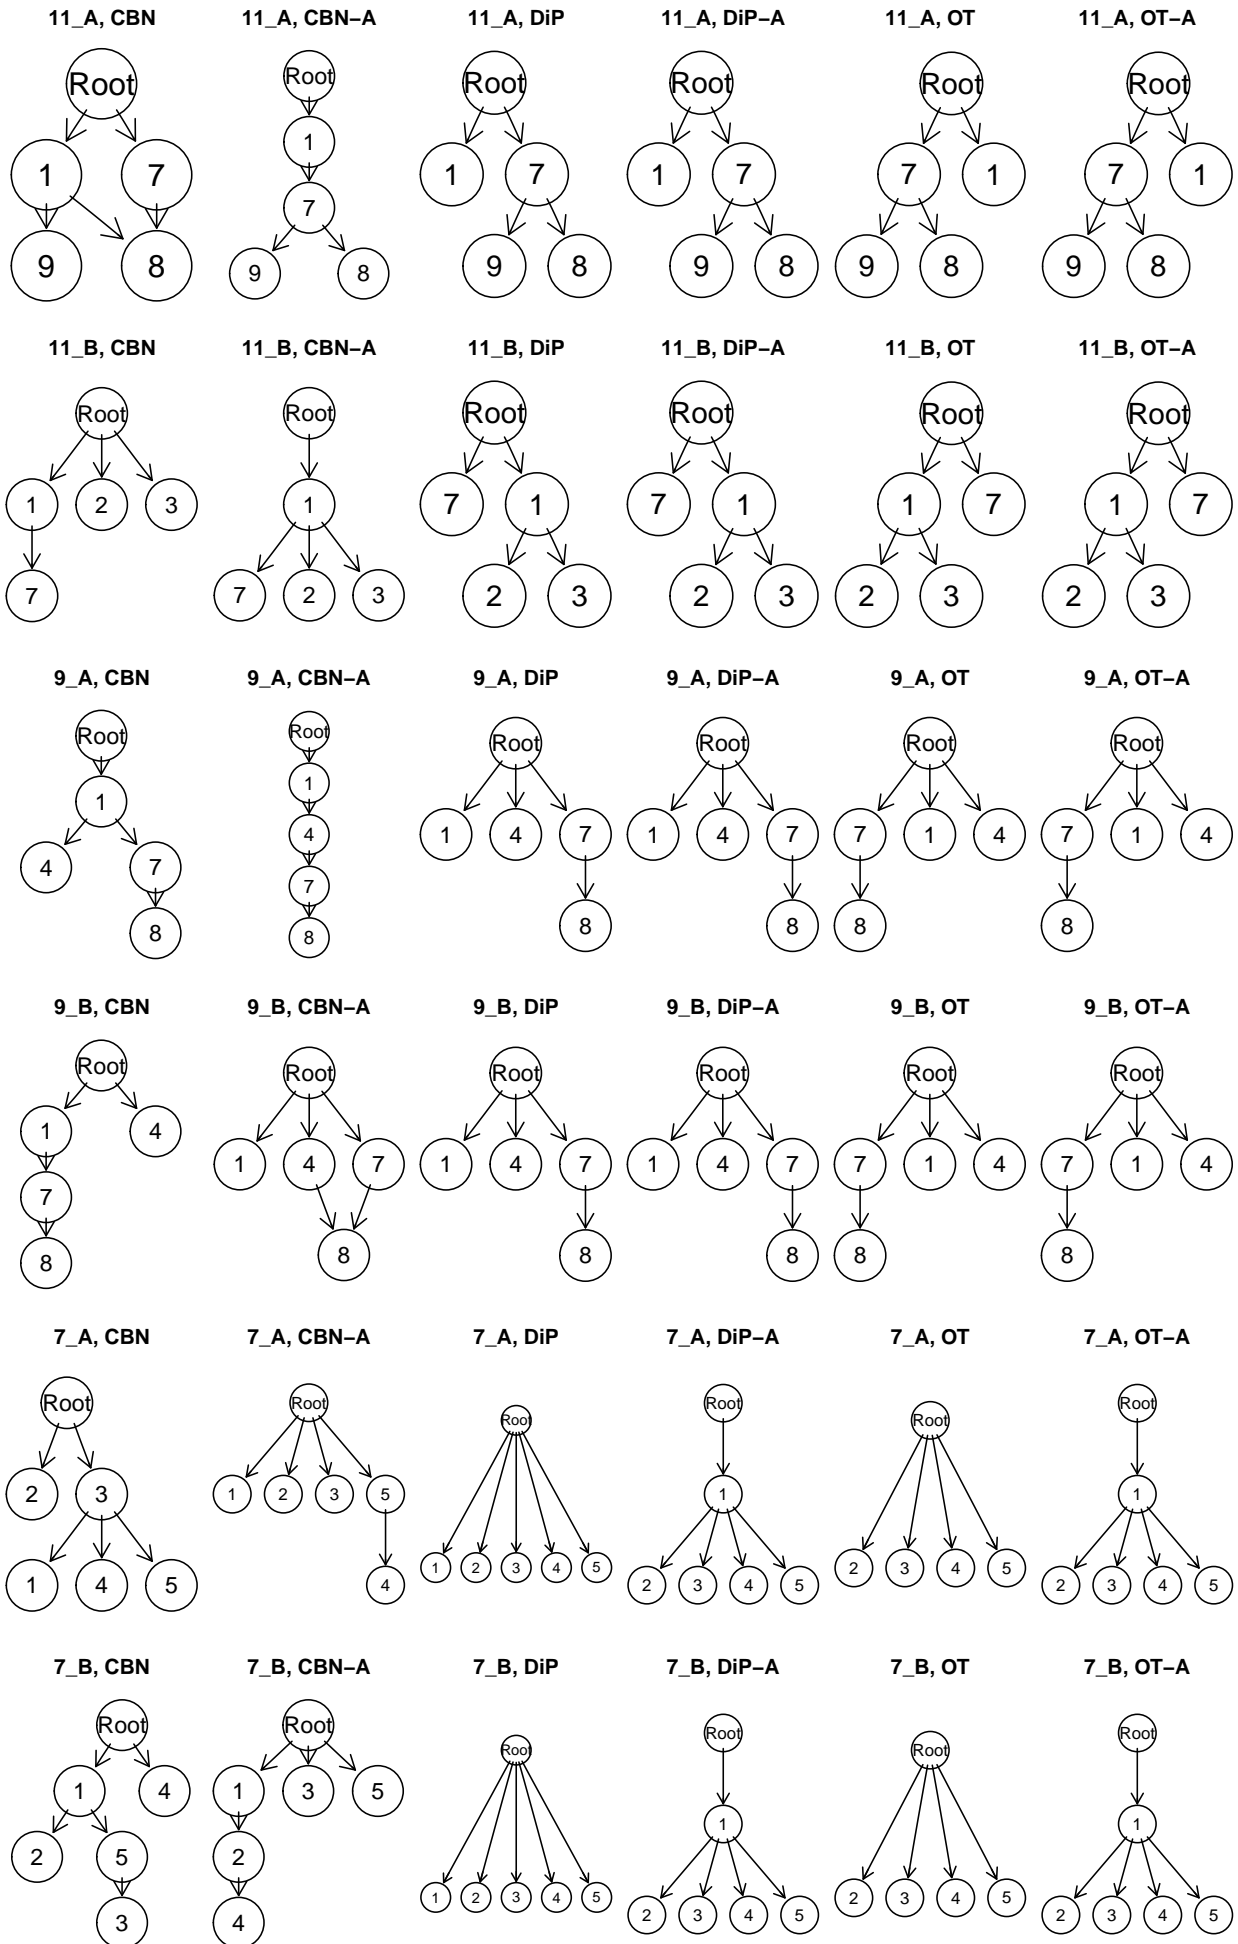

# Filtering = J5. Model = McF\_6

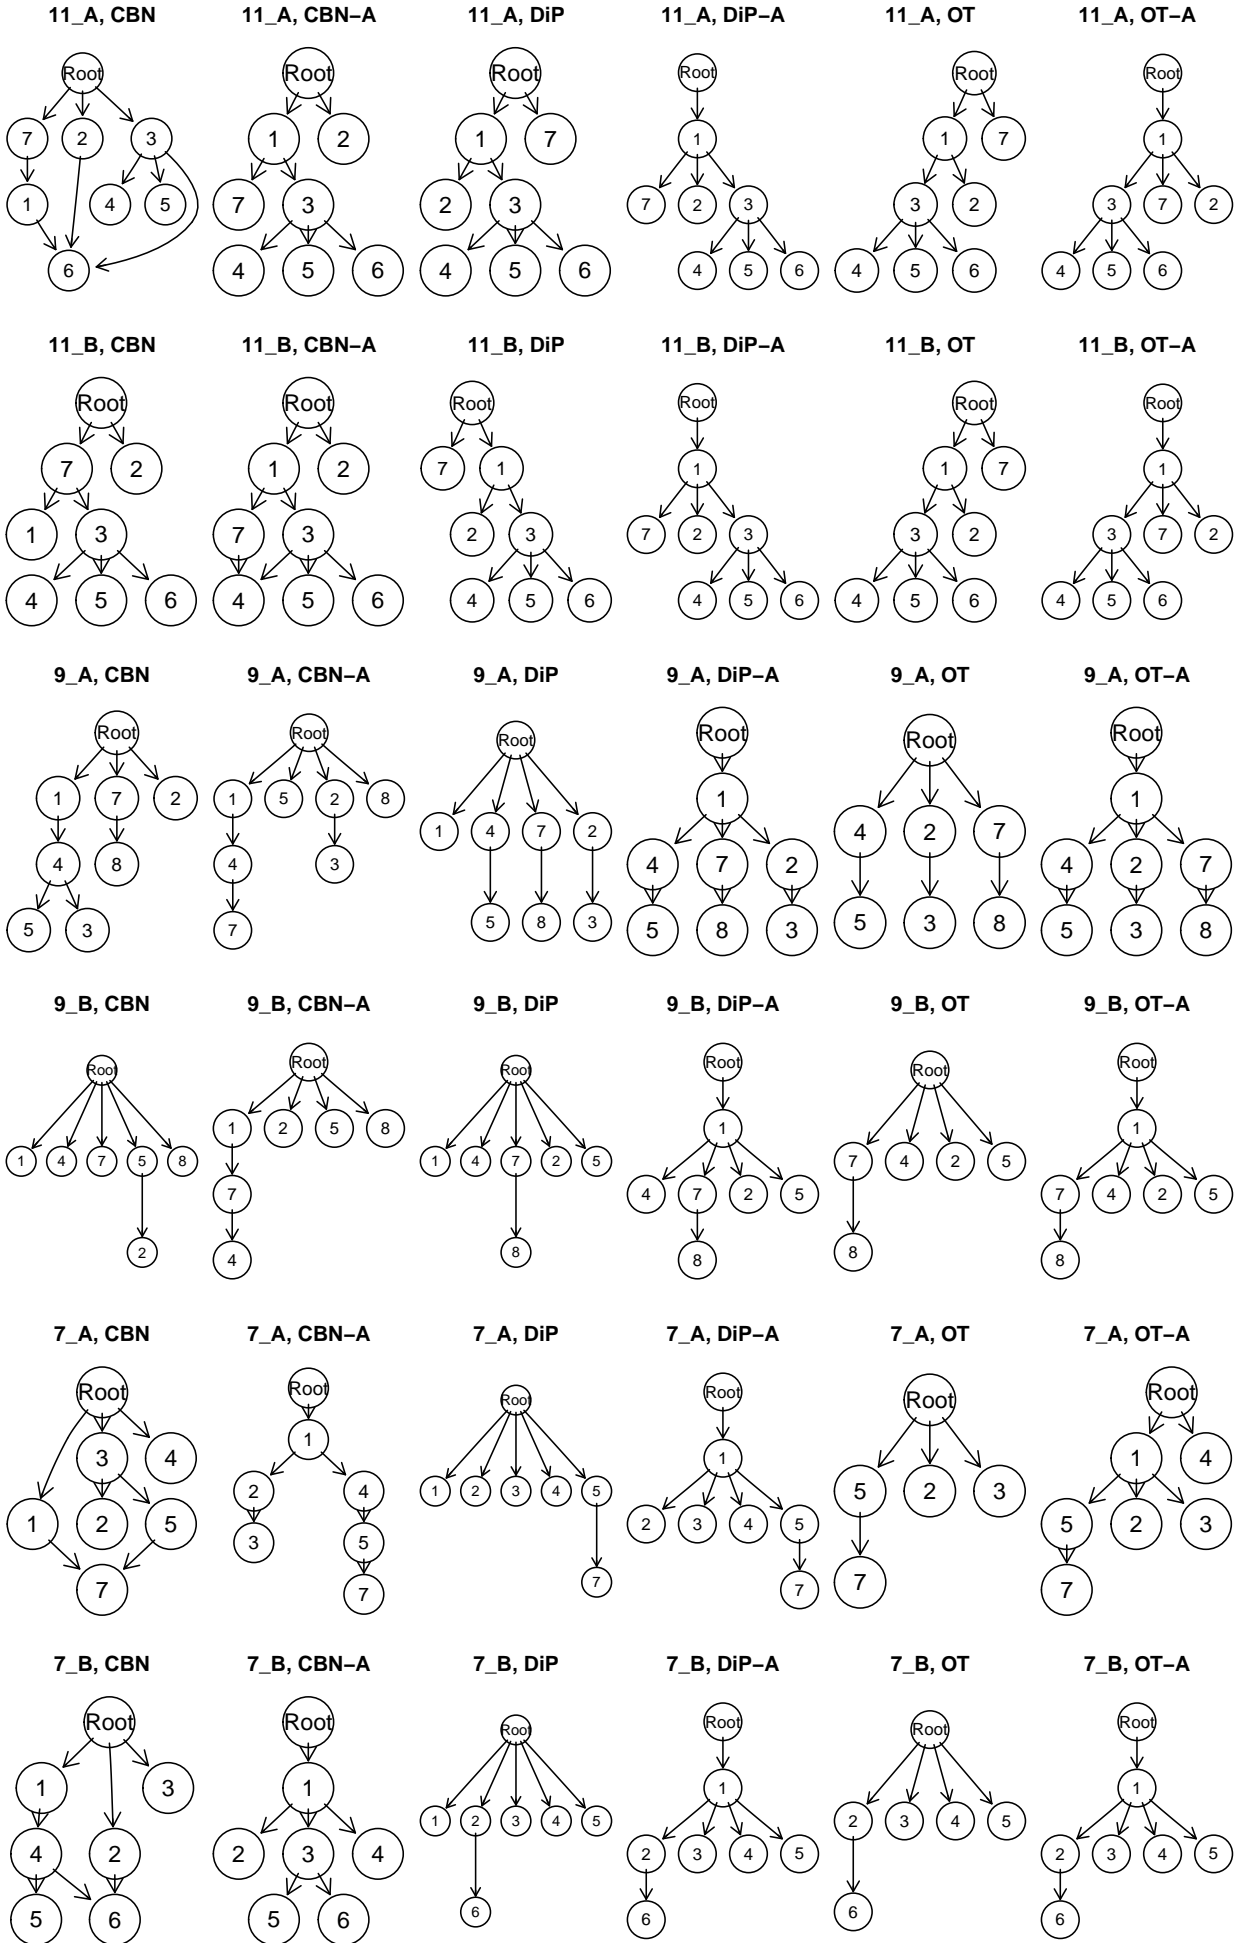

Supplement: 12859_2015_466_MOESM5_ESM.pdf [file 12859_2015_466_MOESM5_ESM.pdf]
