# Supplementary material for: Identifying restrictions in the order of accumulation of mutations during tumor progression: effects of passengers, evolutionary models, and sampling
Source: PubMed Central journal article supplement (PMC4339747; doi:10.1186/s12859-015-0466-7), 2015-02-12
Supplement: 12859_2015_466_MOESM4_ESM.pdf [file 12859_2015_466_MOESM4_ESM.pdf]

# Additional file 4. Complete tables of confidence sets.

Supplementary material for “Identifying Restrictions in the Order of Accumulation of Mutations during Tumor Progression: Effects of Passengers, Evolutionary Models, and Sampling”

Ramon Diaz-Uriarte

Dept. Biochemistry, Universidad Autónoma de Madrid

Instituto de Investigaciones Biomédicas “Alberto Sols” (UAM-CSIC)

Madrid, Spain

ramon.diaz@iib.uam.es

rdiaz02@gmail.com

<http://ligarto.org/rdiaz>

## Contents

|          |                                                          |            |
|----------|----------------------------------------------------------|------------|
| <b>1</b> | <b>Introduction</b>                                      | <b>3</b>   |
| <b>2</b> | <b>Drivers Known (MCB-2)</b>                             | <b>4</b>   |
| 2.1      | Confidence sets (MCB-2), Diff, Drivers Known . . . . .   | 5          |
| 2.2      | Confidence sets (MCB-2), PFD, Drivers Known . . . . .    | 27         |
| 2.3      | Confidence sets (MCB-2), PND, Drivers Known . . . . .    | 49         |
| 2.4      | Confidence sets (MCB-2), FPF, Drivers Known . . . . .    | 71         |
| <b>3</b> | <b>Drivers Unknown (MCB-2)</b>                           | <b>93</b>  |
| 3.1      | Confidence sets (MCB-2), Diff, Drivers Unknown . . . . . | 94         |
| 3.2      | Confidence sets (MCB-2), PFD, Drivers Unknown . . . . .  | 124        |
| 3.3      | Confidence sets (MCB-2), PND, Drivers Unknown . . . . .  | 168        |
| 3.4      | Confidence sets (MCB-2), FPF, Drivers Unknown . . . . .  | 196        |
| <b>4</b> | <b>Drivers Known (MCB)</b>                               | <b>276</b> |
| 4.1      | Confidence sets (MCB), Diff, Drivers Known . . . . .     | 277        |
| 4.2      | Confidence sets (MCB), PFD, Drivers Known . . . . .      | 299        |
| 4.3      | Confidence sets (MCB), PND, Drivers Known . . . . .      | 321        |
| 4.4      | Confidence sets (MCB), FPF, Drivers Known . . . . .      | 343        |
| <b>5</b> | <b>Drivers Unknown (MCB)</b>                             | <b>365</b> |
| 5.1      | Confidence sets (MCB), Diff, Drivers Unknown . . . . .   | 366        |
| 5.2      | Confidence sets (MCB), PFD, Drivers Unknown . . . . .    | 396        |
| 5.3      | Confidence sets (MCB), PND, Drivers Unknown . . . . .    | 441        |
| 5.4      | Confidence sets (MCB), FPF, Drivers Unknown . . . . .    | 472        |

## List of Tables

|    |                                                                                   |     |
|----|-----------------------------------------------------------------------------------|-----|
| 1  | Confidence sets (method MCB-2) when Drivers are Known for measure Diff. . . . .   | 5   |
| 2  | Confidence sets (method MCB-2) when Drivers are Known for measure PFD. . . . .    | 27  |
| 3  | Confidence sets (method MCB-2) when Drivers are Known for measure PND. . . . .    | 49  |
| 4  | Confidence sets (method MCB-2) when Drivers are Known for measure FPF. . . . .    | 71  |
| 5  | Confidence sets (method MCB-2) when Drivers are Unknown for measure Diff. . . . . | 94  |
| 6  | Confidence sets (method MCB-2) when Drivers are Unknown for measure PFD. . . . .  | 124 |
| 7  | Confidence sets (method MCB-2) when Drivers are Unknown for measure PND. . . . .  | 168 |
| 8  | Confidence sets (method MCB-2) when Drivers are Unknown for measure FPF. . . . .  | 196 |
| 9  | Confidence sets (method MCB) when Drivers are Known for measure Diff. . . . .     | 277 |
| 10 | Confidence sets (method MCB) when Drivers are Known for measure PFD. . . . .      | 299 |
| 11 | Confidence sets (method MCB) when Drivers are Known for measure PND. . . . .      | 321 |
| 12 | Confidence sets (method MCB) when Drivers are Known for measure FPF. . . . .      | 343 |
| 13 | Confidence sets (method MCB) when Drivers are Unknown for measure Diff. . . . .   | 366 |
| 14 | Confidence sets (method MCB) when Drivers are Unknown for measure PFD. . . . .    | 396 |
| 15 | Confidence sets (method MCB) when Drivers are Unknown for measure PND. . . . .    | 441 |
| 16 | Confidence sets (method MCB) when Drivers are Unknown for measure FPF. . . . .    | 472 |

## 1 Introduction

This file shows the confidence sets for the 864 combinations of among-data set variables. Therefore, each value is based on the comparison of 20 within-data set replicates.

The meaning of the column headings is as used in the rest of the ms. The column denoted “Drivers” refers to the true number of drivers (this information is redundant given the name of the Graph, but allows for easily scanning the large tables). The last column gives the confidence set, obtained from using the “multiple comparisons with the best” procedure, in two different versions (see details in manuscript and Additional File 1); the two methods are called MCB and MCB-2.

**2 Drivers Known (MCB-2)**

## 2.1 Confidence sets (MCB-2), Diff, Drivers Known

Table 1: Confidence sets (method MCB-2) when Drivers are Known for measure Diff.

|    | Conjunction | Drivers | Tree | S.Size | Model | sh  | S.Time | S.Type      | Best method(s)              |
|----|-------------|---------|------|--------|-------|-----|--------|-------------|-----------------------------|
| 1  | Yes         | 11      | 11-A | 1000   | Bozic | 0   | last   | singleC     | OT, OT-A                    |
| 2  | Yes         | 11      | 11-A | 1000   | Bozic | 0   | last   | wholeT_0.01 | CBN-A, DiP, DiP-A, OT, OT-A |
| 3  | Yes         | 11      | 11-A | 1000   | Bozic | 0   | last   | wholeT_0.5  | OT, OT-A                    |
| 4  | Yes         | 11      | 11-A | 1000   | Bozic | 0   | unif   | singleC     | OT, OT-A                    |
| 5  | Yes         | 11      | 11-A | 1000   | Bozic | 0   | unif   | wholeT_0.01 | CBN-A, OT, OT-A             |
| 6  | Yes         | 11      | 11-A | 1000   | Bozic | 0   | unif   | wholeT_0.5  | OT, OT-A                    |
| 7  | Yes         | 11      | 11-A | 1000   | Bozic | Inf | last   | singleC     | OT, OT-A                    |
| 8  | Yes         | 11      | 11-A | 1000   | Bozic | Inf | last   | wholeT_0.01 | CBN-A, DiP, DiP-A, OT, OT-A |
| 9  | Yes         | 11      | 11-A | 1000   | Bozic | Inf | last   | wholeT_0.5  | OT, OT-A                    |
| 10 | Yes         | 11      | 11-A | 1000   | Bozic | Inf | unif   | singleC     | OT, OT-A                    |
| 11 | Yes         | 11      | 11-A | 1000   | Bozic | Inf | unif   | wholeT_0.01 | CBN-A, OT, OT-A             |
| 12 | Yes         | 11      | 11-A | 1000   | Bozic | Inf | unif   | wholeT_0.5  | OT, OT-A                    |
| 13 | Yes         | 11      | 11-A | 1000   | exp   | 0   | last   | singleC     | OT, OT-A                    |
| 14 | Yes         | 11      | 11-A | 1000   | exp   | 0   | last   | wholeT_0.01 | OT, OT-A                    |
| 15 | Yes         | 11      | 11-A | 1000   | exp   | 0   | last   | wholeT_0.5  | OT, OT-A                    |
| 16 | Yes         | 11      | 11-A | 1000   | exp   | 0   | unif   | singleC     | OT, OT-A                    |
| 17 | Yes         | 11      | 11-A | 1000   | exp   | 0   | unif   | wholeT_0.01 | OT, OT-A                    |
| 18 | Yes         | 11      | 11-A | 1000   | exp   | 0   | unif   | wholeT_0.5  | OT, OT-A                    |
| 19 | Yes         | 11      | 11-A | 1000   | exp   | Inf | last   | singleC     | OT, OT-A                    |
| 20 | Yes         | 11      | 11-A | 1000   | exp   | Inf | last   | wholeT_0.01 | OT, OT-A                    |
| 21 | Yes         | 11      | 11-A | 1000   | exp   | Inf | last   | wholeT_0.5  | OT, OT-A                    |
| 22 | Yes         | 11      | 11-A | 1000   | exp   | Inf | unif   | singleC     | OT, OT-A                    |
| 23 | Yes         | 11      | 11-A | 1000   | exp   | Inf | unif   | wholeT_0.01 | CBN, OT, OT-A               |
| 24 | Yes         | 11      | 11-A | 1000   | exp   | Inf | unif   | wholeT_0.5  | OT, OT-A                    |
| 25 | Yes         | 11      | 11-A | 1000   | McF_4 | 0   | last   | singleC     | OT, OT-A                    |
| 26 | Yes         | 11      | 11-A | 1000   | McF_4 | 0   | last   | wholeT_0.01 | OT, OT-A                    |
| 27 | Yes         | 11      | 11-A | 1000   | McF_4 | 0   | last   | wholeT_0.5  | OT, OT-A                    |
| 28 | Yes         | 11      | 11-A | 1000   | McF_4 | 0   | unif   | singleC     | OT, OT-A                    |
| 29 | Yes         | 11      | 11-A | 1000   | McF_4 | 0   | unif   | wholeT_0.01 | OT, OT-A                    |
| 30 | Yes         | 11      | 11-A | 1000   | McF_4 | 0   | unif   | wholeT_0.5  | OT, OT-A                    |
| 31 | Yes         | 11      | 11-A | 1000   | McF_4 | Inf | last   | singleC     | OT, OT-A                    |
| 32 | Yes         | 11      | 11-A | 1000   | McF_4 | Inf | last   | wholeT_0.01 | OT, OT-A                    |
| 33 | Yes         | 11      | 11-A | 1000   | McF_4 | Inf | last   | wholeT_0.5  | OT, OT-A                    |
| 34 | Yes         | 11      | 11-A | 1000   | McF_4 | Inf | unif   | singleC     | OT, OT-A                    |
| 35 | Yes         | 11      | 11-A | 1000   | McF_4 | Inf | unif   | wholeT_0.01 | OT, OT-A                    |
| 36 | Yes         | 11      | 11-A | 1000   | McF_4 | Inf | unif   | wholeT_0.5  | OT, OT-A                    |
| 37 | Yes         | 11      | 11-A | 1000   | McF_6 | 0   | last   | singleC     | DiP                         |

Table 1: (continued)

|    | Conjunction | Drivers | Tree | S.Size | Model | sh  | S.Time | S.Type      | Best method(s)       |
|----|-------------|---------|------|--------|-------|-----|--------|-------------|----------------------|
| 38 | Yes         | 11      | 11-A | 1000   | McF_6 | 0   | last   | wholeT_0.01 | DiP                  |
| 39 | Yes         | 11      | 11-A | 1000   | McF_6 | 0   | last   | wholeT_0.5  | DiP                  |
| 40 | Yes         | 11      | 11-A | 1000   | McF_6 | 0   | unif   | singleC     | DiP, DiP-A, OT, OT-A |
| 41 | Yes         | 11      | 11-A | 1000   | McF_6 | 0   | unif   | wholeT_0.01 | DiP, DiP-A           |
| 42 | Yes         | 11      | 11-A | 1000   | McF_6 | 0   | unif   | wholeT_0.5  | DiP, DiP-A, OT, OT-A |
| 43 | Yes         | 11      | 11-A | 1000   | McF_6 | Inf | last   | singleC     | OT                   |
| 44 | Yes         | 11      | 11-A | 1000   | McF_6 | Inf | last   | wholeT_0.01 | OT                   |
| 45 | Yes         | 11      | 11-A | 1000   | McF_6 | Inf | last   | wholeT_0.5  | OT                   |
| 46 | Yes         | 11      | 11-A | 1000   | McF_6 | Inf | unif   | singleC     | DiP, DiP-A, OT, OT-A |
| 47 | Yes         | 11      | 11-A | 1000   | McF_6 | Inf | unif   | wholeT_0.01 | DiP, DiP-A, OT, OT-A |
| 48 | Yes         | 11      | 11-A | 1000   | McF_6 | Inf | unif   | wholeT_0.5  | DiP, DiP-A, OT, OT-A |
| 49 | Yes         | 11      | 11-A | 200    | Bozic | 0   | last   | singleC     | OT, OT-A             |
| 50 | Yes         | 11      | 11-A | 200    | Bozic | 0   | last   | wholeT_0.01 | OT, OT-A             |
| 51 | Yes         | 11      | 11-A | 200    | Bozic | 0   | last   | wholeT_0.5  | OT, OT-A             |
| 52 | Yes         | 11      | 11-A | 200    | Bozic | 0   | unif   | singleC     | OT, OT-A             |
| 53 | Yes         | 11      | 11-A | 200    | Bozic | 0   | unif   | wholeT_0.01 | OT, OT-A             |
| 54 | Yes         | 11      | 11-A | 200    | Bozic | 0   | unif   | wholeT_0.5  | OT, OT-A             |
| 55 | Yes         | 11      | 11-A | 200    | Bozic | Inf | last   | singleC     | OT, OT-A             |
| 56 | Yes         | 11      | 11-A | 200    | Bozic | Inf | last   | wholeT_0.01 | OT, OT-A             |
| 57 | Yes         | 11      | 11-A | 200    | Bozic | Inf | last   | wholeT_0.5  | OT, OT-A             |
| 58 | Yes         | 11      | 11-A | 200    | Bozic | Inf | unif   | singleC     | OT, OT-A             |
| 59 | Yes         | 11      | 11-A | 200    | Bozic | Inf | unif   | wholeT_0.01 | OT, OT-A             |
| 60 | Yes         | 11      | 11-A | 200    | Bozic | Inf | unif   | wholeT_0.5  | OT, OT-A             |
| 61 | Yes         | 11      | 11-A | 200    | exp   | 0   | last   | singleC     | OT, OT-A             |
| 62 | Yes         | 11      | 11-A | 200    | exp   | 0   | last   | wholeT_0.01 | OT, OT-A             |
| 63 | Yes         | 11      | 11-A | 200    | exp   | 0   | last   | wholeT_0.5  | OT, OT-A             |
| 64 | Yes         | 11      | 11-A | 200    | exp   | 0   | unif   | singleC     | OT, OT-A             |
| 65 | Yes         | 11      | 11-A | 200    | exp   | 0   | unif   | wholeT_0.01 | OT, OT-A             |
| 66 | Yes         | 11      | 11-A | 200    | exp   | 0   | unif   | wholeT_0.5  | OT, OT-A             |
| 67 | Yes         | 11      | 11-A | 200    | exp   | Inf | last   | singleC     | OT, OT-A             |
| 68 | Yes         | 11      | 11-A | 200    | exp   | Inf | last   | wholeT_0.01 | CBN-A, OT, OT-A      |
| 69 | Yes         | 11      | 11-A | 200    | exp   | Inf | last   | wholeT_0.5  | OT, OT-A             |
| 70 | Yes         | 11      | 11-A | 200    | exp   | Inf | unif   | singleC     | OT, OT-A             |
| 71 | Yes         | 11      | 11-A | 200    | exp   | Inf | unif   | wholeT_0.01 | OT, OT-A             |
| 72 | Yes         | 11      | 11-A | 200    | exp   | Inf | unif   | wholeT_0.5  | OT, OT-A             |
| 73 | Yes         | 11      | 11-A | 200    | McF_4 | 0   | last   | singleC     | OT, OT-A             |
| 74 | Yes         | 11      | 11-A | 200    | McF_4 | 0   | last   | wholeT_0.01 | OT, OT-A             |
| 75 | Yes         | 11      | 11-A | 200    | McF_4 | 0   | last   | wholeT_0.5  | OT, OT-A             |
| 76 | Yes         | 11      | 11-A | 200    | McF_4 | 0   | unif   | singleC     | OT, OT-A             |
| 77 | Yes         | 11      | 11-A | 200    | McF_4 | 0   | unif   | wholeT_0.01 | OT, OT-A             |

Table 1: (continued)

|     | Conjunction | Drivers | Tree | S.Size | Model | sh  | S.Time | S.Type      | Best method(s)       |
|-----|-------------|---------|------|--------|-------|-----|--------|-------------|----------------------|
| 78  | Yes         | 11      | 11-A | 200    | McF_4 | 0   | unif   | wholeT_0.5  | OT, OT-A             |
| 79  | Yes         | 11      | 11-A | 200    | McF_4 | Inf | last   | singleC     | OT, OT-A             |
| 80  | Yes         | 11      | 11-A | 200    | McF_4 | Inf | last   | wholeT_0.01 | OT, OT-A             |
| 81  | Yes         | 11      | 11-A | 200    | McF_4 | Inf | last   | wholeT_0.5  | OT, OT-A             |
| 82  | Yes         | 11      | 11-A | 200    | McF_4 | Inf | unif   | singleC     | OT, OT-A             |
| 83  | Yes         | 11      | 11-A | 200    | McF_4 | Inf | unif   | wholeT_0.01 | OT, OT-A             |
| 84  | Yes         | 11      | 11-A | 200    | McF_4 | Inf | unif   | wholeT_0.5  | OT, OT-A             |
| 85  | Yes         | 11      | 11-A | 200    | McF_6 | 0   | last   | singleC     | OT                   |
| 86  | Yes         | 11      | 11-A | 200    | McF_6 | 0   | last   | wholeT_0.01 | OT                   |
| 87  | Yes         | 11      | 11-A | 200    | McF_6 | 0   | last   | wholeT_0.5  | OT                   |
| 88  | Yes         | 11      | 11-A | 200    | McF_6 | 0   | unif   | singleC     | OT, OT-A             |
| 89  | Yes         | 11      | 11-A | 200    | McF_6 | 0   | unif   | wholeT_0.01 | OT, OT-A             |
| 90  | Yes         | 11      | 11-A | 200    | McF_6 | 0   | unif   | wholeT_0.5  | OT, OT-A             |
| 91  | Yes         | 11      | 11-A | 200    | McF_6 | Inf | last   | singleC     | OT                   |
| 92  | Yes         | 11      | 11-A | 200    | McF_6 | Inf | last   | wholeT_0.01 | OT, OT-A             |
| 93  | Yes         | 11      | 11-A | 200    | McF_6 | Inf | last   | wholeT_0.5  | OT                   |
| 94  | Yes         | 11      | 11-A | 200    | McF_6 | Inf | unif   | singleC     | CBN, CBN-A, OT, OT-A |
| 95  | Yes         | 11      | 11-A | 200    | McF_6 | Inf | unif   | wholeT_0.01 | OT, OT-A             |
| 96  | Yes         | 11      | 11-A | 200    | McF_6 | Inf | unif   | wholeT_0.5  | CBN-A, OT, OT-A      |
| 97  | Yes         | 11      | 11-A | 100    | Bozic | 0   | last   | singleC     | OT, OT-A             |
| 98  | Yes         | 11      | 11-A | 100    | Bozic | 0   | last   | wholeT_0.01 | OT, OT-A             |
| 99  | Yes         | 11      | 11-A | 100    | Bozic | 0   | last   | wholeT_0.5  | OT, OT-A             |
| 100 | Yes         | 11      | 11-A | 100    | Bozic | 0   | unif   | singleC     | OT, OT-A             |
| 101 | Yes         | 11      | 11-A | 100    | Bozic | 0   | unif   | wholeT_0.01 | OT, OT-A             |
| 102 | Yes         | 11      | 11-A | 100    | Bozic | 0   | unif   | wholeT_0.5  | OT, OT-A             |
| 103 | Yes         | 11      | 11-A | 100    | Bozic | Inf | last   | singleC     | OT, OT-A             |
| 104 | Yes         | 11      | 11-A | 100    | Bozic | Inf | last   | wholeT_0.01 | OT, OT-A             |
| 105 | Yes         | 11      | 11-A | 100    | Bozic | Inf | last   | wholeT_0.5  | OT, OT-A             |
| 106 | Yes         | 11      | 11-A | 100    | Bozic | Inf | unif   | singleC     | OT, OT-A             |
| 107 | Yes         | 11      | 11-A | 100    | Bozic | Inf | unif   | wholeT_0.01 | OT, OT-A             |
| 108 | Yes         | 11      | 11-A | 100    | Bozic | Inf | unif   | wholeT_0.5  | OT, OT-A             |
| 109 | Yes         | 11      | 11-A | 100    | exp   | 0   | last   | singleC     | OT, OT-A             |
| 110 | Yes         | 11      | 11-A | 100    | exp   | 0   | last   | wholeT_0.01 | OT, OT-A             |
| 111 | Yes         | 11      | 11-A | 100    | exp   | 0   | last   | wholeT_0.5  | OT, OT-A             |
| 112 | Yes         | 11      | 11-A | 100    | exp   | 0   | unif   | singleC     | OT, OT-A             |
| 113 | Yes         | 11      | 11-A | 100    | exp   | 0   | unif   | wholeT_0.01 | OT, OT-A             |
| 114 | Yes         | 11      | 11-A | 100    | exp   | 0   | unif   | wholeT_0.5  | OT, OT-A             |
| 115 | Yes         | 11      | 11-A | 100    | exp   | Inf | last   | singleC     | OT, OT-A             |
| 116 | Yes         | 11      | 11-A | 100    | exp   | Inf | last   | wholeT_0.01 | OT, OT-A             |
| 117 | Yes         | 11      | 11-A | 100    | exp   | Inf | last   | wholeT_0.5  | OT, OT-A             |

Table 1: (continued)

|     | Conjunction | Drivers | Tree | S.Size | Model | sh  | S.Time | S.Type      | Best method(s)  |
|-----|-------------|---------|------|--------|-------|-----|--------|-------------|-----------------|
| 118 | Yes         | 11      | 11-A | 100    | exp   | Inf | unif   | singleC     | OT, OT-A        |
| 119 | Yes         | 11      | 11-A | 100    | exp   | Inf | unif   | wholeT_0.01 | OT, OT-A        |
| 120 | Yes         | 11      | 11-A | 100    | exp   | Inf | unif   | wholeT_0.5  | OT, OT-A        |
| 121 | Yes         | 11      | 11-A | 100    | McF_4 | 0   | last   | singleC     | OT, OT-A        |
| 122 | Yes         | 11      | 11-A | 100    | McF_4 | 0   | last   | wholeT_0.01 | OT, OT-A        |
| 123 | Yes         | 11      | 11-A | 100    | McF_4 | 0   | last   | wholeT_0.5  | OT, OT-A        |
| 124 | Yes         | 11      | 11-A | 100    | McF_4 | 0   | unif   | singleC     | OT, OT-A        |
| 125 | Yes         | 11      | 11-A | 100    | McF_4 | 0   | unif   | wholeT_0.01 | OT, OT-A        |
| 126 | Yes         | 11      | 11-A | 100    | McF_4 | 0   | unif   | wholeT_0.5  | OT, OT-A        |
| 127 | Yes         | 11      | 11-A | 100    | McF_4 | Inf | last   | singleC     | OT, OT-A        |
| 128 | Yes         | 11      | 11-A | 100    | McF_4 | Inf | last   | wholeT_0.01 | OT, OT-A        |
| 129 | Yes         | 11      | 11-A | 100    | McF_4 | Inf | last   | wholeT_0.5  | OT, OT-A        |
| 130 | Yes         | 11      | 11-A | 100    | McF_4 | Inf | unif   | singleC     | OT, OT-A        |
| 131 | Yes         | 11      | 11-A | 100    | McF_4 | Inf | unif   | wholeT_0.01 | OT, OT-A        |
| 132 | Yes         | 11      | 11-A | 100    | McF_4 | Inf | unif   | wholeT_0.5  | OT, OT-A        |
| 133 | Yes         | 11      | 11-A | 100    | McF_6 | 0   | last   | singleC     | OT              |
| 134 | Yes         | 11      | 11-A | 100    | McF_6 | 0   | last   | wholeT_0.01 | OT, OT-A        |
| 135 | Yes         | 11      | 11-A | 100    | McF_6 | 0   | last   | wholeT_0.5  | OT              |
| 136 | Yes         | 11      | 11-A | 100    | McF_6 | 0   | unif   | singleC     | OT, OT-A        |
| 137 | Yes         | 11      | 11-A | 100    | McF_6 | 0   | unif   | wholeT_0.01 | OT, OT-A        |
| 138 | Yes         | 11      | 11-A | 100    | McF_6 | 0   | unif   | wholeT_0.5  | OT, OT-A        |
| 139 | Yes         | 11      | 11-A | 100    | McF_6 | Inf | last   | singleC     | OT              |
| 140 | Yes         | 11      | 11-A | 100    | McF_6 | Inf | last   | wholeT_0.01 | OT, OT-A        |
| 141 | Yes         | 11      | 11-A | 100    | McF_6 | Inf | last   | wholeT_0.5  | OT              |
| 142 | Yes         | 11      | 11-A | 100    | McF_6 | Inf | unif   | singleC     | OT, OT-A        |
| 143 | Yes         | 11      | 11-A | 100    | McF_6 | Inf | unif   | wholeT_0.01 | CBN-A, OT, OT-A |
| 144 | Yes         | 11      | 11-A | 100    | McF_6 | Inf | unif   | wholeT_0.5  | OT, OT-A        |
| 145 | Yes         | 9       | 9-A  | 1000   | Bozic | 0   | last   | singleC     | OT, OT-A        |
| 146 | Yes         | 9       | 9-A  | 1000   | Bozic | 0   | last   | wholeT_0.01 | OT, OT-A        |
| 147 | Yes         | 9       | 9-A  | 1000   | Bozic | 0   | last   | wholeT_0.5  | OT, OT-A        |
| 148 | Yes         | 9       | 9-A  | 1000   | Bozic | 0   | unif   | singleC     | OT, OT-A        |
| 149 | Yes         | 9       | 9-A  | 1000   | Bozic | 0   | unif   | wholeT_0.01 | OT, OT-A        |
| 150 | Yes         | 9       | 9-A  | 1000   | Bozic | 0   | unif   | wholeT_0.5  | OT, OT-A        |
| 151 | Yes         | 9       | 9-A  | 1000   | Bozic | Inf | last   | singleC     | OT, OT-A        |
| 152 | Yes         | 9       | 9-A  | 1000   | Bozic | Inf | last   | wholeT_0.01 | OT, OT-A        |
| 153 | Yes         | 9       | 9-A  | 1000   | Bozic | Inf | last   | wholeT_0.5  | OT, OT-A        |
| 154 | Yes         | 9       | 9-A  | 1000   | Bozic | Inf | unif   | singleC     | OT, OT-A        |
| 155 | Yes         | 9       | 9-A  | 1000   | Bozic | Inf | unif   | wholeT_0.01 | CBN-A, OT, OT-A |
| 156 | Yes         | 9       | 9-A  | 1000   | Bozic | Inf | unif   | wholeT_0.5  | OT, OT-A        |
| 157 | Yes         | 9       | 9-A  | 1000   | exp   | 0   | last   | singleC     | OT, OT-A        |



Table 1: (continued)

|     | Conjunction | Drivers | Tree | S.Size | Model | sh  | S.Time | S.Type      | Best method(s)       |
|-----|-------------|---------|------|--------|-------|-----|--------|-------------|----------------------|
| 158 | Yes         | 9       | 9-A  | 1000   | exp   | 0   | last   | wholeT_0.01 | OT, OT-A             |
| 159 | Yes         | 9       | 9-A  | 1000   | exp   | 0   | last   | wholeT_0.5  | OT, OT-A             |
| 160 | Yes         | 9       | 9-A  | 1000   | exp   | 0   | unif   | singleC     | OT, OT-A             |
| 161 | Yes         | 9       | 9-A  | 1000   | exp   | 0   | unif   | wholeT_0.01 | OT, OT-A             |
| 162 | Yes         | 9       | 9-A  | 1000   | exp   | 0   | unif   | wholeT_0.5  | OT, OT-A             |
| 163 | Yes         | 9       | 9-A  | 1000   | exp   | Inf | last   | singleC     | OT, OT-A             |
| 164 | Yes         | 9       | 9-A  | 1000   | exp   | Inf | last   | wholeT_0.01 | CBN, OT, OT-A        |
| 165 | Yes         | 9       | 9-A  | 1000   | exp   | Inf | last   | wholeT_0.5  | OT, OT-A             |
| 166 | Yes         | 9       | 9-A  | 1000   | exp   | Inf | unif   | singleC     | OT, OT-A             |
| 167 | Yes         | 9       | 9-A  | 1000   | exp   | Inf | unif   | wholeT_0.01 | OT, OT-A             |
| 168 | Yes         | 9       | 9-A  | 1000   | exp   | Inf | unif   | wholeT_0.5  | OT, OT-A             |
| 169 | Yes         | 9       | 9-A  | 1000   | McF_4 | 0   | last   | singleC     | OT, OT-A             |
| 170 | Yes         | 9       | 9-A  | 1000   | McF_4 | 0   | last   | wholeT_0.01 | DiP, DiP-A, OT, OT-A |
| 171 | Yes         | 9       | 9-A  | 1000   | McF_4 | 0   | last   | wholeT_0.5  | OT, OT-A             |
| 172 | Yes         | 9       | 9-A  | 1000   | McF_4 | 0   | unif   | singleC     | OT, OT-A             |
| 173 | Yes         | 9       | 9-A  | 1000   | McF_4 | 0   | unif   | wholeT_0.01 | OT, OT-A             |
| 174 | Yes         | 9       | 9-A  | 1000   | McF_4 | 0   | unif   | wholeT_0.5  | OT, OT-A             |
| 175 | Yes         | 9       | 9-A  | 1000   | McF_4 | Inf | last   | singleC     | OT, OT-A             |
| 176 | Yes         | 9       | 9-A  | 1000   | McF_4 | Inf | last   | wholeT_0.01 | OT                   |
| 177 | Yes         | 9       | 9-A  | 1000   | McF_4 | Inf | last   | wholeT_0.5  | OT, OT-A             |
| 178 | Yes         | 9       | 9-A  | 1000   | McF_4 | Inf | unif   | singleC     | OT, OT-A             |
| 179 | Yes         | 9       | 9-A  | 1000   | McF_4 | Inf | unif   | wholeT_0.01 | OT, OT-A             |
| 180 | Yes         | 9       | 9-A  | 1000   | McF_4 | Inf | unif   | wholeT_0.5  | OT, OT-A             |
| 181 | Yes         | 9       | 9-A  | 1000   | McF_6 | 0   | last   | singleC     | OT                   |
| 182 | Yes         | 9       | 9-A  | 1000   | McF_6 | 0   | last   | wholeT_0.01 | DiP, OT              |
| 183 | Yes         | 9       | 9-A  | 1000   | McF_6 | 0   | last   | wholeT_0.5  | OT                   |
| 184 | Yes         | 9       | 9-A  | 1000   | McF_6 | 0   | unif   | singleC     | DiP, DiP-A, OT, OT-A |
| 185 | Yes         | 9       | 9-A  | 1000   | McF_6 | 0   | unif   | wholeT_0.01 | DiP, DiP-A, OT, OT-A |
| 186 | Yes         | 9       | 9-A  | 1000   | McF_6 | 0   | unif   | wholeT_0.5  | DiP, DiP-A, OT, OT-A |
| 187 | Yes         | 9       | 9-A  | 1000   | McF_6 | Inf | last   | singleC     | OT                   |
| 188 | Yes         | 9       | 9-A  | 1000   | McF_6 | Inf | last   | wholeT_0.01 | OT                   |
| 189 | Yes         | 9       | 9-A  | 1000   | McF_6 | Inf | last   | wholeT_0.5  | DiP, OT              |
| 190 | Yes         | 9       | 9-A  | 1000   | McF_6 | Inf | unif   | singleC     | CBN, OT, OT-A        |
| 191 | Yes         | 9       | 9-A  | 1000   | McF_6 | Inf | unif   | wholeT_0.01 | CBN-A, OT, OT-A      |
| 192 | Yes         | 9       | 9-A  | 1000   | McF_6 | Inf | unif   | wholeT_0.5  | OT, OT-A             |
| 193 | Yes         | 9       | 9-A  | 200    | Bozic | 0   | last   | singleC     | OT, OT-A             |
| 194 | Yes         | 9       | 9-A  | 200    | Bozic | 0   | last   | wholeT_0.01 | OT, OT-A             |
| 195 | Yes         | 9       | 9-A  | 200    | Bozic | 0   | last   | wholeT_0.5  | OT, OT-A             |
| 196 | Yes         | 9       | 9-A  | 200    | Bozic | 0   | unif   | singleC     | OT, OT-A             |
| 197 | Yes         | 9       | 9-A  | 200    | Bozic | 0   | unif   | wholeT_0.01 | OT, OT-A             |

Table 1: (continued)

|     | Conjunction | Drivers | Tree | S.Size | Model | sh  | S.Time | S.Type      | Best method(s) |
|-----|-------------|---------|------|--------|-------|-----|--------|-------------|----------------|
| 198 | Yes         | 9       | 9-A  | 200    | Bozic | 0   | unif   | wholeT_0.5  | OT, OT-A       |
| 199 | Yes         | 9       | 9-A  | 200    | Bozic | Inf | last   | singleC     | OT, OT-A       |
| 200 | Yes         | 9       | 9-A  | 200    | Bozic | Inf | last   | wholeT_0.01 | OT, OT-A       |
| 201 | Yes         | 9       | 9-A  | 200    | Bozic | Inf | last   | wholeT_0.5  | OT, OT-A       |
| 202 | Yes         | 9       | 9-A  | 200    | Bozic | Inf | unif   | singleC     | OT, OT-A       |
| 203 | Yes         | 9       | 9-A  | 200    | Bozic | Inf | unif   | wholeT_0.01 | OT, OT-A       |
| 204 | Yes         | 9       | 9-A  | 200    | Bozic | Inf | unif   | wholeT_0.5  | OT, OT-A       |
| 205 | Yes         | 9       | 9-A  | 200    | exp   | 0   | last   | singleC     | OT, OT-A       |
| 206 | Yes         | 9       | 9-A  | 200    | exp   | 0   | last   | wholeT_0.01 | OT, OT-A       |
| 207 | Yes         | 9       | 9-A  | 200    | exp   | 0   | last   | wholeT_0.5  | OT, OT-A       |
| 208 | Yes         | 9       | 9-A  | 200    | exp   | 0   | unif   | singleC     | OT, OT-A       |
| 209 | Yes         | 9       | 9-A  | 200    | exp   | 0   | unif   | wholeT_0.01 | OT, OT-A       |
| 210 | Yes         | 9       | 9-A  | 200    | exp   | 0   | unif   | wholeT_0.5  | OT, OT-A       |
| 211 | Yes         | 9       | 9-A  | 200    | exp   | Inf | last   | singleC     | OT, OT-A       |
| 212 | Yes         | 9       | 9-A  | 200    | exp   | Inf | last   | wholeT_0.01 | OT, OT-A       |
| 213 | Yes         | 9       | 9-A  | 200    | exp   | Inf | last   | wholeT_0.5  | OT, OT-A       |
| 214 | Yes         | 9       | 9-A  | 200    | exp   | Inf | unif   | singleC     | OT, OT-A       |
| 215 | Yes         | 9       | 9-A  | 200    | exp   | Inf | unif   | wholeT_0.01 | OT, OT-A       |
| 216 | Yes         | 9       | 9-A  | 200    | exp   | Inf | unif   | wholeT_0.5  | OT, OT-A       |
| 217 | Yes         | 9       | 9-A  | 200    | McF_4 | 0   | last   | singleC     | OT, OT-A       |
| 218 | Yes         | 9       | 9-A  | 200    | McF_4 | 0   | last   | wholeT_0.01 | OT, OT-A       |
| 219 | Yes         | 9       | 9-A  | 200    | McF_4 | 0   | last   | wholeT_0.5  | OT, OT-A       |
| 220 | Yes         | 9       | 9-A  | 200    | McF_4 | 0   | unif   | singleC     | OT, OT-A       |
| 221 | Yes         | 9       | 9-A  | 200    | McF_4 | 0   | unif   | wholeT_0.01 | OT, OT-A       |
| 222 | Yes         | 9       | 9-A  | 200    | McF_4 | 0   | unif   | wholeT_0.5  | OT, OT-A       |
| 223 | Yes         | 9       | 9-A  | 200    | McF_4 | Inf | last   | singleC     | OT, OT-A       |
| 224 | Yes         | 9       | 9-A  | 200    | McF_4 | Inf | last   | wholeT_0.01 | OT             |
| 225 | Yes         | 9       | 9-A  | 200    | McF_4 | Inf | last   | wholeT_0.5  | OT, OT-A       |
| 226 | Yes         | 9       | 9-A  | 200    | McF_4 | Inf | unif   | singleC     | OT, OT-A       |
| 227 | Yes         | 9       | 9-A  | 200    | McF_4 | Inf | unif   | wholeT_0.01 | OT, OT-A       |
| 228 | Yes         | 9       | 9-A  | 200    | McF_4 | Inf | unif   | wholeT_0.5  | OT, OT-A       |
| 229 | Yes         | 9       | 9-A  | 200    | McF_6 | 0   | last   | singleC     | OT             |
| 230 | Yes         | 9       | 9-A  | 200    | McF_6 | 0   | last   | wholeT_0.01 | OT             |
| 231 | Yes         | 9       | 9-A  | 200    | McF_6 | 0   | last   | wholeT_0.5  | OT             |
| 232 | Yes         | 9       | 9-A  | 200    | McF_6 | 0   | unif   | singleC     | CBN, OT, OT-A  |
| 233 | Yes         | 9       | 9-A  | 200    | McF_6 | 0   | unif   | wholeT_0.01 | OT, OT-A       |
| 234 | Yes         | 9       | 9-A  | 200    | McF_6 | 0   | unif   | wholeT_0.5  | OT, OT-A       |
| 235 | Yes         | 9       | 9-A  | 200    | McF_6 | Inf | last   | singleC     | OT             |
| 236 | Yes         | 9       | 9-A  | 200    | McF_6 | Inf | last   | wholeT_0.01 | OT             |
| 237 | Yes         | 9       | 9-A  | 200    | McF_6 | Inf | last   | wholeT_0.5  | OT             |

Table 1: (continued)

|     | Conjunction | Drivers | Tree | S.Size | Model | sh  | S.Time | S.Type      | Best method(s) |
|-----|-------------|---------|------|--------|-------|-----|--------|-------------|----------------|
| 238 | Yes         | 9       | 9-A  | 200    | McF_6 | Inf | unif   | singleC     | OT, OT-A       |
| 239 | Yes         | 9       | 9-A  | 200    | McF_6 | Inf | unif   | wholeT_0.01 | OT, OT-A       |
| 240 | Yes         | 9       | 9-A  | 200    | McF_6 | Inf | unif   | wholeT_0.5  | OT, OT-A       |
| 241 | Yes         | 9       | 9-A  | 100    | Bozic | 0   | last   | singleC     | OT, OT-A       |
| 242 | Yes         | 9       | 9-A  | 100    | Bozic | 0   | last   | wholeT_0.01 | OT, OT-A       |
| 243 | Yes         | 9       | 9-A  | 100    | Bozic | 0   | last   | wholeT_0.5  | OT, OT-A       |
| 244 | Yes         | 9       | 9-A  | 100    | Bozic | 0   | unif   | singleC     | OT, OT-A       |
| 245 | Yes         | 9       | 9-A  | 100    | Bozic | 0   | unif   | wholeT_0.01 | OT, OT-A       |
| 246 | Yes         | 9       | 9-A  | 100    | Bozic | 0   | unif   | wholeT_0.5  | OT, OT-A       |
| 247 | Yes         | 9       | 9-A  | 100    | Bozic | Inf | last   | singleC     | OT, OT-A       |
| 248 | Yes         | 9       | 9-A  | 100    | Bozic | Inf | last   | wholeT_0.01 | OT, OT-A       |
| 249 | Yes         | 9       | 9-A  | 100    | Bozic | Inf | last   | wholeT_0.5  | OT, OT-A       |
| 250 | Yes         | 9       | 9-A  | 100    | Bozic | Inf | unif   | singleC     | OT, OT-A       |
| 251 | Yes         | 9       | 9-A  | 100    | Bozic | Inf | unif   | wholeT_0.01 | OT, OT-A       |
| 252 | Yes         | 9       | 9-A  | 100    | Bozic | Inf | unif   | wholeT_0.5  | OT, OT-A       |
| 253 | Yes         | 9       | 9-A  | 100    | exp   | 0   | last   | singleC     | OT, OT-A       |
| 254 | Yes         | 9       | 9-A  | 100    | exp   | 0   | last   | wholeT_0.01 | OT, OT-A       |
| 255 | Yes         | 9       | 9-A  | 100    | exp   | 0   | last   | wholeT_0.5  | OT, OT-A       |
| 256 | Yes         | 9       | 9-A  | 100    | exp   | 0   | unif   | singleC     | OT, OT-A       |
| 257 | Yes         | 9       | 9-A  | 100    | exp   | 0   | unif   | wholeT_0.01 | OT, OT-A       |
| 258 | Yes         | 9       | 9-A  | 100    | exp   | 0   | unif   | wholeT_0.5  | OT, OT-A       |
| 259 | Yes         | 9       | 9-A  | 100    | exp   | Inf | last   | singleC     | OT, OT-A       |
| 260 | Yes         | 9       | 9-A  | 100    | exp   | Inf | last   | wholeT_0.01 | OT, OT-A       |
| 261 | Yes         | 9       | 9-A  | 100    | exp   | Inf | last   | wholeT_0.5  | OT, OT-A       |
| 262 | Yes         | 9       | 9-A  | 100    | exp   | Inf | unif   | singleC     | OT, OT-A       |
| 263 | Yes         | 9       | 9-A  | 100    | exp   | Inf | unif   | wholeT_0.01 | OT, OT-A       |
| 264 | Yes         | 9       | 9-A  | 100    | exp   | Inf | unif   | wholeT_0.5  | OT, OT-A       |
| 265 | Yes         | 9       | 9-A  | 100    | McF_4 | 0   | last   | singleC     | OT, OT-A       |
| 266 | Yes         | 9       | 9-A  | 100    | McF_4 | 0   | last   | wholeT_0.01 | OT, OT-A       |
| 267 | Yes         | 9       | 9-A  | 100    | McF_4 | 0   | last   | wholeT_0.5  | OT, OT-A       |
| 268 | Yes         | 9       | 9-A  | 100    | McF_4 | 0   | unif   | singleC     | OT, OT-A       |
| 269 | Yes         | 9       | 9-A  | 100    | McF_4 | 0   | unif   | wholeT_0.01 | OT, OT-A       |
| 270 | Yes         | 9       | 9-A  | 100    | McF_4 | 0   | unif   | wholeT_0.5  | OT, OT-A       |
| 271 | Yes         | 9       | 9-A  | 100    | McF_4 | Inf | last   | singleC     | OT, OT-A       |
| 272 | Yes         | 9       | 9-A  | 100    | McF_4 | Inf | last   | wholeT_0.01 | OT             |
| 273 | Yes         | 9       | 9-A  | 100    | McF_4 | Inf | last   | wholeT_0.5  | OT, OT-A       |
| 274 | Yes         | 9       | 9-A  | 100    | McF_4 | Inf | unif   | singleC     | OT, OT-A       |
| 275 | Yes         | 9       | 9-A  | 100    | McF_4 | Inf | unif   | wholeT_0.01 | OT, OT-A       |
| 276 | Yes         | 9       | 9-A  | 100    | McF_4 | Inf | unif   | wholeT_0.5  | OT, OT-A       |
| 277 | Yes         | 9       | 9-A  | 100    | McF_6 | 0   | last   | singleC     | OT             |

Table 1: (continued)

|     | Conjunction | Drivers | Tree | S.Size | Model | sh  | S.Time | S.Type      | Best method(s)       |
|-----|-------------|---------|------|--------|-------|-----|--------|-------------|----------------------|
| 278 | Yes         | 9       | 9-A  | 100    | McF_6 | 0   | last   | wholeT_0.01 | OT                   |
| 279 | Yes         | 9       | 9-A  | 100    | McF_6 | 0   | last   | wholeT_0.5  | OT                   |
| 280 | Yes         | 9       | 9-A  | 100    | McF_6 | 0   | unif   | singleC     | OT, OT-A             |
| 281 | Yes         | 9       | 9-A  | 100    | McF_6 | 0   | unif   | wholeT_0.01 | OT, OT-A             |
| 282 | Yes         | 9       | 9-A  | 100    | McF_6 | 0   | unif   | wholeT_0.5  | OT, OT-A             |
| 283 | Yes         | 9       | 9-A  | 100    | McF_6 | Inf | last   | singleC     | OT                   |
| 284 | Yes         | 9       | 9-A  | 100    | McF_6 | Inf | last   | wholeT_0.01 | OT                   |
| 285 | Yes         | 9       | 9-A  | 100    | McF_6 | Inf | last   | wholeT_0.5  | OT                   |
| 286 | Yes         | 9       | 9-A  | 100    | McF_6 | Inf | unif   | singleC     | OT, OT-A             |
| 287 | Yes         | 9       | 9-A  | 100    | McF_6 | Inf | unif   | wholeT_0.01 | CBN, OT, OT-A        |
| 288 | Yes         | 9       | 9-A  | 100    | McF_6 | Inf | unif   | wholeT_0.5  | OT, OT-A             |
| 289 | Yes         | 7       | 7-A  | 1000   | Bozic | 0   | last   | singleC     | OT-A                 |
| 290 | Yes         | 7       | 7-A  | 1000   | Bozic | 0   | last   | wholeT_0.01 | OT-A                 |
| 291 | Yes         | 7       | 7-A  | 1000   | Bozic | 0   | last   | wholeT_0.5  | OT-A                 |
| 292 | Yes         | 7       | 7-A  | 1000   | Bozic | 0   | unif   | singleC     | OT, OT-A             |
| 293 | Yes         | 7       | 7-A  | 1000   | Bozic | 0   | unif   | wholeT_0.01 | CBN, CBN-A           |
| 294 | Yes         | 7       | 7-A  | 1000   | Bozic | 0   | unif   | wholeT_0.5  | OT, OT-A             |
| 295 | Yes         | 7       | 7-A  | 1000   | Bozic | Inf | last   | singleC     | OT-A                 |
| 296 | Yes         | 7       | 7-A  | 1000   | Bozic | Inf | last   | wholeT_0.01 | OT-A                 |
| 297 | Yes         | 7       | 7-A  | 1000   | Bozic | Inf | last   | wholeT_0.5  | OT-A                 |
| 298 | Yes         | 7       | 7-A  | 1000   | Bozic | Inf | unif   | singleC     | CBN, CBN-A           |
| 299 | Yes         | 7       | 7-A  | 1000   | Bozic | Inf | unif   | wholeT_0.01 | OT, OT-A             |
| 300 | Yes         | 7       | 7-A  | 1000   | Bozic | Inf | unif   | wholeT_0.5  | CBN, CBN-A           |
| 301 | Yes         | 7       | 7-A  | 1000   | exp   | 0   | last   | singleC     | OT-A                 |
| 302 | Yes         | 7       | 7-A  | 1000   | exp   | 0   | last   | wholeT_0.01 | OT-A                 |
| 303 | Yes         | 7       | 7-A  | 1000   | exp   | 0   | last   | wholeT_0.5  | OT-A                 |
| 304 | Yes         | 7       | 7-A  | 1000   | exp   | 0   | unif   | singleC     | OT, OT-A             |
| 305 | Yes         | 7       | 7-A  | 1000   | exp   | 0   | unif   | wholeT_0.01 | CBN, CBN-A, OT-A     |
| 306 | Yes         | 7       | 7-A  | 1000   | exp   | 0   | unif   | wholeT_0.5  | OT, OT-A             |
| 307 | Yes         | 7       | 7-A  | 1000   | exp   | Inf | last   | singleC     | OT-A                 |
| 308 | Yes         | 7       | 7-A  | 1000   | exp   | Inf | last   | wholeT_0.01 | OT-A                 |
| 309 | Yes         | 7       | 7-A  | 1000   | exp   | Inf | last   | wholeT_0.5  | OT-A                 |
| 310 | Yes         | 7       | 7-A  | 1000   | exp   | Inf | unif   | singleC     | CBN, CBN-A, OT, OT-A |
| 311 | Yes         | 7       | 7-A  | 1000   | exp   | Inf | unif   | wholeT_0.01 | CBN, OT, OT-A        |
| 312 | Yes         | 7       | 7-A  | 1000   | exp   | Inf | unif   | wholeT_0.5  | CBN, CBN-A           |
| 313 | Yes         | 7       | 7-A  | 1000   | McF_4 | 0   | last   | singleC     | OT-A                 |
| 314 | Yes         | 7       | 7-A  | 1000   | McF_4 | 0   | last   | wholeT_0.01 | OT-A                 |
| 315 | Yes         | 7       | 7-A  | 1000   | McF_4 | 0   | last   | wholeT_0.5  | OT-A                 |
| 316 | Yes         | 7       | 7-A  | 1000   | McF_4 | 0   | unif   | singleC     | OT, OT-A             |
| 317 | Yes         | 7       | 7-A  | 1000   | McF_4 | 0   | unif   | wholeT_0.01 | OT, OT-A             |

Table 1: (continued)

|     | Conjunction | Drivers | Tree | S.Size | Model | sh  | S.Time | S.Type      | Best method(s)       |
|-----|-------------|---------|------|--------|-------|-----|--------|-------------|----------------------|
| 318 | Yes         | 7       | 7-A  | 1000   | McF_4 | 0   | unif   | wholeT_0.5  | OT, OT-A             |
| 319 | Yes         | 7       | 7-A  | 1000   | McF_4 | Inf | last   | singleC     | OT-A                 |
| 320 | Yes         | 7       | 7-A  | 1000   | McF_4 | Inf | last   | wholeT_0.01 | OT-A                 |
| 321 | Yes         | 7       | 7-A  | 1000   | McF_4 | Inf | last   | wholeT_0.5  | OT-A                 |
| 322 | Yes         | 7       | 7-A  | 1000   | McF_4 | Inf | unif   | singleC     | OT, OT-A             |
| 323 | Yes         | 7       | 7-A  | 1000   | McF_4 | Inf | unif   | wholeT_0.01 | OT, OT-A             |
| 324 | Yes         | 7       | 7-A  | 1000   | McF_4 | Inf | unif   | wholeT_0.5  | OT, OT-A             |
| 325 | Yes         | 7       | 7-A  | 1000   | McF_6 | 0   | last   | singleC     | OT-A                 |
| 326 | Yes         | 7       | 7-A  | 1000   | McF_6 | 0   | last   | wholeT_0.01 | OT-A                 |
| 327 | Yes         | 7       | 7-A  | 1000   | McF_6 | 0   | last   | wholeT_0.5  | OT-A                 |
| 328 | Yes         | 7       | 7-A  | 1000   | McF_6 | 0   | unif   | singleC     | CBN-A                |
| 329 | Yes         | 7       | 7-A  | 1000   | McF_6 | 0   | unif   | wholeT_0.01 | CBN-A, DiP, DiP-A    |
| 330 | Yes         | 7       | 7-A  | 1000   | McF_6 | 0   | unif   | wholeT_0.5  | CBN-A                |
| 331 | Yes         | 7       | 7-A  | 1000   | McF_6 | Inf | last   | singleC     | DiP-A, OT-A          |
| 332 | Yes         | 7       | 7-A  | 1000   | McF_6 | Inf | last   | wholeT_0.01 | DiP-A, OT-A          |
| 333 | Yes         | 7       | 7-A  | 1000   | McF_6 | Inf | last   | wholeT_0.5  | DiP-A, OT-A          |
| 334 | Yes         | 7       | 7-A  | 1000   | McF_6 | Inf | unif   | singleC     | CBN-A                |
| 335 | Yes         | 7       | 7-A  | 1000   | McF_6 | Inf | unif   | wholeT_0.01 | CBN-A                |
| 336 | Yes         | 7       | 7-A  | 1000   | McF_6 | Inf | unif   | wholeT_0.5  | CBN-A                |
| 337 | Yes         | 7       | 7-A  | 200    | Bozic | 0   | last   | singleC     | OT-A                 |
| 338 | Yes         | 7       | 7-A  | 200    | Bozic | 0   | last   | wholeT_0.01 | OT-A                 |
| 339 | Yes         | 7       | 7-A  | 200    | Bozic | 0   | last   | wholeT_0.5  | OT-A                 |
| 340 | Yes         | 7       | 7-A  | 200    | Bozic | 0   | unif   | singleC     | OT, OT-A             |
| 341 | Yes         | 7       | 7-A  | 200    | Bozic | 0   | unif   | wholeT_0.01 | CBN, CBN-A           |
| 342 | Yes         | 7       | 7-A  | 200    | Bozic | 0   | unif   | wholeT_0.5  | OT, OT-A             |
| 343 | Yes         | 7       | 7-A  | 200    | Bozic | Inf | last   | singleC     | OT-A                 |
| 344 | Yes         | 7       | 7-A  | 200    | Bozic | Inf | last   | wholeT_0.01 | OT-A                 |
| 345 | Yes         | 7       | 7-A  | 200    | Bozic | Inf | last   | wholeT_0.5  | OT-A                 |
| 346 | Yes         | 7       | 7-A  | 200    | Bozic | Inf | unif   | singleC     | CBN, CBN-A           |
| 347 | Yes         | 7       | 7-A  | 200    | Bozic | Inf | unif   | wholeT_0.01 | OT, OT-A             |
| 348 | Yes         | 7       | 7-A  | 200    | Bozic | Inf | unif   | wholeT_0.5  | CBN, CBN-A           |
| 349 | Yes         | 7       | 7-A  | 200    | exp   | 0   | last   | singleC     | OT-A                 |
| 350 | Yes         | 7       | 7-A  | 200    | exp   | 0   | last   | wholeT_0.01 | OT-A                 |
| 351 | Yes         | 7       | 7-A  | 200    | exp   | 0   | last   | wholeT_0.5  | OT-A                 |
| 352 | Yes         | 7       | 7-A  | 200    | exp   | 0   | unif   | singleC     | OT, OT-A             |
| 353 | Yes         | 7       | 7-A  | 200    | exp   | 0   | unif   | wholeT_0.01 | CBN, CBN-A, OT, OT-A |
| 354 | Yes         | 7       | 7-A  | 200    | exp   | 0   | unif   | wholeT_0.5  | OT, OT-A             |
| 355 | Yes         | 7       | 7-A  | 200    | exp   | Inf | last   | singleC     | OT-A                 |
| 356 | Yes         | 7       | 7-A  | 200    | exp   | Inf | last   | wholeT_0.01 | OT-A                 |
| 357 | Yes         | 7       | 7-A  | 200    | exp   | Inf | last   | wholeT_0.5  | OT-A                 |

Table 1: (continued)

|     | Conjunction | Drivers | Tree | S.Size | Model | sh  | S.Time | S.Type      | Best method(s)       |
|-----|-------------|---------|------|--------|-------|-----|--------|-------------|----------------------|
| 358 | Yes         | 7       | 7-A  | 200    | exp   | Inf | unif   | singleC     | CBN, CBN-A, OT, OT-A |
| 359 | Yes         | 7       | 7-A  | 200    | exp   | Inf | unif   | wholeT_0.01 | OT, OT-A             |
| 360 | Yes         | 7       | 7-A  | 200    | exp   | Inf | unif   | wholeT_0.5  | CBN, CBN-A, OT, OT-A |
| 361 | Yes         | 7       | 7-A  | 200    | McF_4 | 0   | last   | singleC     | OT-A                 |
| 362 | Yes         | 7       | 7-A  | 200    | McF_4 | 0   | last   | wholeT_0.01 | OT-A                 |
| 363 | Yes         | 7       | 7-A  | 200    | McF_4 | 0   | last   | wholeT_0.5  | OT-A                 |
| 364 | Yes         | 7       | 7-A  | 200    | McF_4 | 0   | unif   | singleC     | OT, OT-A             |
| 365 | Yes         | 7       | 7-A  | 200    | McF_4 | 0   | unif   | wholeT_0.01 | OT, OT-A             |
| 366 | Yes         | 7       | 7-A  | 200    | McF_4 | 0   | unif   | wholeT_0.5  | OT, OT-A             |
| 367 | Yes         | 7       | 7-A  | 200    | McF_4 | Inf | last   | singleC     | OT-A                 |
| 368 | Yes         | 7       | 7-A  | 200    | McF_4 | Inf | last   | wholeT_0.01 | OT-A                 |
| 369 | Yes         | 7       | 7-A  | 200    | McF_4 | Inf | last   | wholeT_0.5  | OT-A                 |
| 370 | Yes         | 7       | 7-A  | 200    | McF_4 | Inf | unif   | singleC     | OT, OT-A             |
| 371 | Yes         | 7       | 7-A  | 200    | McF_4 | Inf | unif   | wholeT_0.01 | OT, OT-A             |
| 372 | Yes         | 7       | 7-A  | 200    | McF_4 | Inf | unif   | wholeT_0.5  | OT, OT-A             |
| 373 | Yes         | 7       | 7-A  | 200    | McF_6 | 0   | last   | singleC     | OT-A                 |
| 374 | Yes         | 7       | 7-A  | 200    | McF_6 | 0   | last   | wholeT_0.01 | OT-A                 |
| 375 | Yes         | 7       | 7-A  | 200    | McF_6 | 0   | last   | wholeT_0.5  | OT-A                 |
| 376 | Yes         | 7       | 7-A  | 200    | McF_6 | 0   | unif   | singleC     | CBN-A                |
| 377 | Yes         | 7       | 7-A  | 200    | McF_6 | 0   | unif   | wholeT_0.01 | CBN-A, OT, OT-A      |
| 378 | Yes         | 7       | 7-A  | 200    | McF_6 | 0   | unif   | wholeT_0.5  | CBN-A                |
| 379 | Yes         | 7       | 7-A  | 200    | McF_6 | Inf | last   | singleC     | OT-A                 |
| 380 | Yes         | 7       | 7-A  | 200    | McF_6 | Inf | last   | wholeT_0.01 | OT-A                 |
| 381 | Yes         | 7       | 7-A  | 200    | McF_6 | Inf | last   | wholeT_0.5  | OT-A                 |
| 382 | Yes         | 7       | 7-A  | 200    | McF_6 | Inf | unif   | singleC     | CBN-A                |
| 383 | Yes         | 7       | 7-A  | 200    | McF_6 | Inf | unif   | wholeT_0.01 | CBN-A                |
| 384 | Yes         | 7       | 7-A  | 200    | McF_6 | Inf | unif   | wholeT_0.5  | CBN-A                |
| 385 | Yes         | 7       | 7-A  | 100    | Bozic | 0   | last   | singleC     | OT-A                 |
| 386 | Yes         | 7       | 7-A  | 100    | Bozic | 0   | last   | wholeT_0.01 | OT-A                 |
| 387 | Yes         | 7       | 7-A  | 100    | Bozic | 0   | last   | wholeT_0.5  | OT-A                 |
| 388 | Yes         | 7       | 7-A  | 100    | Bozic | 0   | unif   | singleC     | OT, OT-A             |
| 389 | Yes         | 7       | 7-A  | 100    | Bozic | 0   | unif   | wholeT_0.01 | CBN, CBN-A, OT, OT-A |
| 390 | Yes         | 7       | 7-A  | 100    | Bozic | 0   | unif   | wholeT_0.5  | OT, OT-A             |
| 391 | Yes         | 7       | 7-A  | 100    | Bozic | Inf | last   | singleC     | OT-A                 |
| 392 | Yes         | 7       | 7-A  | 100    | Bozic | Inf | last   | wholeT_0.01 | OT-A                 |
| 393 | Yes         | 7       | 7-A  | 100    | Bozic | Inf | last   | wholeT_0.5  | OT-A                 |
| 394 | Yes         | 7       | 7-A  | 100    | Bozic | Inf | unif   | singleC     | CBN, CBN-A           |
| 395 | Yes         | 7       | 7-A  | 100    | Bozic | Inf | unif   | wholeT_0.01 | CBN, CBN-A, OT, OT-A |
| 396 | Yes         | 7       | 7-A  | 100    | Bozic | Inf | unif   | wholeT_0.5  | CBN, CBN-A           |
| 397 | Yes         | 7       | 7-A  | 100    | exp   | 0   | last   | singleC     | OT-A                 |

Table 1: (continued)

|     | Conjunction | Drivers | Tree | S.Size | Model | sh  | S.Time | S.Type      | Best method(s)       |
|-----|-------------|---------|------|--------|-------|-----|--------|-------------|----------------------|
| 398 | Yes         | 7       | 7-A  | 100    | exp   | 0   | last   | wholeT_0.01 | OT-A                 |
| 399 | Yes         | 7       | 7-A  | 100    | exp   | 0   | last   | wholeT_0.5  | OT-A                 |
| 400 | Yes         | 7       | 7-A  | 100    | exp   | 0   | unif   | singleC     | OT, OT-A             |
| 401 | Yes         | 7       | 7-A  | 100    | exp   | 0   | unif   | wholeT_0.01 | CBN, OT, OT-A        |
| 402 | Yes         | 7       | 7-A  | 100    | exp   | 0   | unif   | wholeT_0.5  | OT, OT-A             |
| 403 | Yes         | 7       | 7-A  | 100    | exp   | Inf | last   | singleC     | OT-A                 |
| 404 | Yes         | 7       | 7-A  | 100    | exp   | Inf | last   | wholeT_0.01 | OT-A                 |
| 405 | Yes         | 7       | 7-A  | 100    | exp   | Inf | last   | wholeT_0.5  | OT-A                 |
| 406 | Yes         | 7       | 7-A  | 100    | exp   | Inf | unif   | singleC     | CBN-A, OT, OT-A      |
| 407 | Yes         | 7       | 7-A  | 100    | exp   | Inf | unif   | wholeT_0.01 | OT, OT-A             |
| 408 | Yes         | 7       | 7-A  | 100    | exp   | Inf | unif   | wholeT_0.5  | CBN, OT, OT-A        |
| 409 | Yes         | 7       | 7-A  | 100    | McF_4 | 0   | last   | singleC     | OT-A                 |
| 410 | Yes         | 7       | 7-A  | 100    | McF_4 | 0   | last   | wholeT_0.01 | OT-A                 |
| 411 | Yes         | 7       | 7-A  | 100    | McF_4 | 0   | last   | wholeT_0.5  | OT-A                 |
| 412 | Yes         | 7       | 7-A  | 100    | McF_4 | 0   | unif   | singleC     | OT, OT-A             |
| 413 | Yes         | 7       | 7-A  | 100    | McF_4 | 0   | unif   | wholeT_0.01 | OT, OT-A             |
| 414 | Yes         | 7       | 7-A  | 100    | McF_4 | 0   | unif   | wholeT_0.5  | OT, OT-A             |
| 415 | Yes         | 7       | 7-A  | 100    | McF_4 | Inf | last   | singleC     | OT-A                 |
| 416 | Yes         | 7       | 7-A  | 100    | McF_4 | Inf | last   | wholeT_0.01 | OT-A                 |
| 417 | Yes         | 7       | 7-A  | 100    | McF_4 | Inf | last   | wholeT_0.5  | OT-A                 |
| 418 | Yes         | 7       | 7-A  | 100    | McF_4 | Inf | unif   | singleC     | OT, OT-A             |
| 419 | Yes         | 7       | 7-A  | 100    | McF_4 | Inf | unif   | wholeT_0.01 | OT, OT-A             |
| 420 | Yes         | 7       | 7-A  | 100    | McF_4 | Inf | unif   | wholeT_0.5  | OT, OT-A             |
| 421 | Yes         | 7       | 7-A  | 100    | McF_6 | 0   | last   | singleC     | OT-A                 |
| 422 | Yes         | 7       | 7-A  | 100    | McF_6 | 0   | last   | wholeT_0.01 | OT-A                 |
| 423 | Yes         | 7       | 7-A  | 100    | McF_6 | 0   | last   | wholeT_0.5  | OT-A                 |
| 424 | Yes         | 7       | 7-A  | 100    | McF_6 | 0   | unif   | singleC     | CBN, CBN-A           |
| 425 | Yes         | 7       | 7-A  | 100    | McF_6 | 0   | unif   | wholeT_0.01 | CBN, CBN-A, OT, OT-A |
| 426 | Yes         | 7       | 7-A  | 100    | McF_6 | 0   | unif   | wholeT_0.5  | CBN-A                |
| 427 | Yes         | 7       | 7-A  | 100    | McF_6 | Inf | last   | singleC     | OT-A                 |
| 428 | Yes         | 7       | 7-A  | 100    | McF_6 | Inf | last   | wholeT_0.01 | OT-A                 |
| 429 | Yes         | 7       | 7-A  | 100    | McF_6 | Inf | last   | wholeT_0.5  | OT-A                 |
| 430 | Yes         | 7       | 7-A  | 100    | McF_6 | Inf | unif   | singleC     | CBN-A                |
| 431 | Yes         | 7       | 7-A  | 100    | McF_6 | Inf | unif   | wholeT_0.01 | CBN-A                |
| 432 | Yes         | 7       | 7-A  | 100    | McF_6 | Inf | unif   | wholeT_0.5  | CBN-A                |
| 433 | No          | 11      | 11-B | 1000   | Bozic | 0   | last   | singleC     | OT, OT-A             |
| 434 | No          | 11      | 11-B | 1000   | Bozic | 0   | last   | wholeT_0.01 | OT, OT-A             |
| 435 | No          | 11      | 11-B | 1000   | Bozic | 0   | last   | wholeT_0.5  | OT, OT-A             |
| 436 | No          | 11      | 11-B | 1000   | Bozic | 0   | unif   | singleC     | OT, OT-A             |
| 437 | No          | 11      | 11-B | 1000   | Bozic | 0   | unif   | wholeT_0.01 | OT, OT-A             |

Table 1: (continued)

|     | Conjunction | Drivers | Tree | S.Size | Model | sh  | S.Time | S.Type      | Best method(s)       |
|-----|-------------|---------|------|--------|-------|-----|--------|-------------|----------------------|
| 438 | No          | 11      | 11-B | 1000   | Bozic | 0   | unif   | wholeT_0.5  | OT, OT-A             |
| 439 | No          | 11      | 11-B | 1000   | Bozic | Inf | last   | singleC     | OT, OT-A             |
| 440 | No          | 11      | 11-B | 1000   | Bozic | Inf | last   | wholeT_0.01 | DiP-A                |
| 441 | No          | 11      | 11-B | 1000   | Bozic | Inf | last   | wholeT_0.5  | OT, OT-A             |
| 442 | No          | 11      | 11-B | 1000   | Bozic | Inf | unif   | singleC     | OT, OT-A             |
| 443 | No          | 11      | 11-B | 1000   | Bozic | Inf | unif   | wholeT_0.01 | OT, OT-A             |
| 444 | No          | 11      | 11-B | 1000   | Bozic | Inf | unif   | wholeT_0.5  | OT, OT-A             |
| 445 | No          | 11      | 11-B | 1000   | exp   | 0   | last   | singleC     | OT, OT-A             |
| 446 | No          | 11      | 11-B | 1000   | exp   | 0   | last   | wholeT_0.01 | OT, OT-A             |
| 447 | No          | 11      | 11-B | 1000   | exp   | 0   | last   | wholeT_0.5  | OT, OT-A             |
| 448 | No          | 11      | 11-B | 1000   | exp   | 0   | unif   | singleC     | OT, OT-A             |
| 449 | No          | 11      | 11-B | 1000   | exp   | 0   | unif   | wholeT_0.01 | OT, OT-A             |
| 450 | No          | 11      | 11-B | 1000   | exp   | 0   | unif   | wholeT_0.5  | OT, OT-A             |
| 451 | No          | 11      | 11-B | 1000   | exp   | Inf | last   | singleC     | OT, OT-A             |
| 452 | No          | 11      | 11-B | 1000   | exp   | Inf | last   | wholeT_0.01 | OT, OT-A             |
| 453 | No          | 11      | 11-B | 1000   | exp   | Inf | last   | wholeT_0.5  | OT, OT-A             |
| 454 | No          | 11      | 11-B | 1000   | exp   | Inf | unif   | singleC     | OT, OT-A             |
| 455 | No          | 11      | 11-B | 1000   | exp   | Inf | unif   | wholeT_0.01 | OT, OT-A             |
| 456 | No          | 11      | 11-B | 1000   | exp   | Inf | unif   | wholeT_0.5  | OT, OT-A             |
| 457 | No          | 11      | 11-B | 1000   | McF_4 | 0   | last   | singleC     | OT, OT-A             |
| 458 | No          | 11      | 11-B | 1000   | McF_4 | 0   | last   | wholeT_0.01 | DiP, DiP-A, OT, OT-A |
| 459 | No          | 11      | 11-B | 1000   | McF_4 | 0   | last   | wholeT_0.5  | OT, OT-A             |
| 460 | No          | 11      | 11-B | 1000   | McF_4 | 0   | unif   | singleC     | OT, OT-A             |
| 461 | No          | 11      | 11-B | 1000   | McF_4 | 0   | unif   | wholeT_0.01 | OT, OT-A             |
| 462 | No          | 11      | 11-B | 1000   | McF_4 | 0   | unif   | wholeT_0.5  | OT, OT-A             |
| 463 | No          | 11      | 11-B | 1000   | McF_4 | Inf | last   | singleC     | OT, OT-A             |
| 464 | No          | 11      | 11-B | 1000   | McF_4 | Inf | last   | wholeT_0.01 | OT, OT-A             |
| 465 | No          | 11      | 11-B | 1000   | McF_4 | Inf | last   | wholeT_0.5  | OT, OT-A             |
| 466 | No          | 11      | 11-B | 1000   | McF_4 | Inf | unif   | singleC     | OT, OT-A             |
| 467 | No          | 11      | 11-B | 1000   | McF_4 | Inf | unif   | wholeT_0.01 | OT, OT-A             |
| 468 | No          | 11      | 11-B | 1000   | McF_4 | Inf | unif   | wholeT_0.5  | OT, OT-A             |
| 469 | No          | 11      | 11-B | 1000   | McF_6 | 0   | last   | singleC     | DiP, OT              |
| 470 | No          | 11      | 11-B | 1000   | McF_6 | 0   | last   | wholeT_0.01 | DiP, OT              |
| 471 | No          | 11      | 11-B | 1000   | McF_6 | 0   | last   | wholeT_0.5  | DiP, OT              |
| 472 | No          | 11      | 11-B | 1000   | McF_6 | 0   | unif   | singleC     | DiP, DiP-A, OT, OT-A |
| 473 | No          | 11      | 11-B | 1000   | McF_6 | 0   | unif   | wholeT_0.01 | DiP, DiP-A, OT, OT-A |
| 474 | No          | 11      | 11-B | 1000   | McF_6 | 0   | unif   | wholeT_0.5  | DiP, DiP-A           |
| 475 | No          | 11      | 11-B | 1000   | McF_6 | Inf | last   | singleC     | DiP, OT              |
| 476 | No          | 11      | 11-B | 1000   | McF_6 | Inf | last   | wholeT_0.01 | OT                   |
| 477 | No          | 11      | 11-B | 1000   | McF_6 | Inf | last   | wholeT_0.5  | DiP, OT              |



Table 1: (continued)

|     | Conjunction | Drivers | Tree | S.Size | Model | sh  | S.Time | S.Type      | Best method(s)       |
|-----|-------------|---------|------|--------|-------|-----|--------|-------------|----------------------|
| 478 | No          | 11      | 11-B | 1000   | McF_6 | Inf | unif   | singleC     | DiP, DiP-A           |
| 479 | No          | 11      | 11-B | 1000   | McF_6 | Inf | unif   | wholeT_0.01 | DiP, DiP-A           |
| 480 | No          | 11      | 11-B | 1000   | McF_6 | Inf | unif   | wholeT_0.5  | DiP, DiP-A, OT, OT-A |
| 481 | No          | 11      | 11-B | 200    | Bozic | 0   | last   | singleC     | OT, OT-A             |
| 482 | No          | 11      | 11-B | 200    | Bozic | 0   | last   | wholeT_0.01 | OT, OT-A             |
| 483 | No          | 11      | 11-B | 200    | Bozic | 0   | last   | wholeT_0.5  | OT, OT-A             |
| 484 | No          | 11      | 11-B | 200    | Bozic | 0   | unif   | singleC     | OT, OT-A             |
| 485 | No          | 11      | 11-B | 200    | Bozic | 0   | unif   | wholeT_0.01 | OT, OT-A             |
| 486 | No          | 11      | 11-B | 200    | Bozic | 0   | unif   | wholeT_0.5  | OT, OT-A             |
| 487 | No          | 11      | 11-B | 200    | Bozic | Inf | last   | singleC     | OT, OT-A             |
| 488 | No          | 11      | 11-B | 200    | Bozic | Inf | last   | wholeT_0.01 | OT, OT-A             |
| 489 | No          | 11      | 11-B | 200    | Bozic | Inf | last   | wholeT_0.5  | OT, OT-A             |
| 490 | No          | 11      | 11-B | 200    | Bozic | Inf | unif   | singleC     | OT, OT-A             |
| 491 | No          | 11      | 11-B | 200    | Bozic | Inf | unif   | wholeT_0.01 | OT, OT-A             |
| 492 | No          | 11      | 11-B | 200    | Bozic | Inf | unif   | wholeT_0.5  | OT, OT-A             |
| 493 | No          | 11      | 11-B | 200    | exp   | 0   | last   | singleC     | OT, OT-A             |
| 494 | No          | 11      | 11-B | 200    | exp   | 0   | last   | wholeT_0.01 | OT, OT-A             |
| 495 | No          | 11      | 11-B | 200    | exp   | 0   | last   | wholeT_0.5  | OT, OT-A             |
| 496 | No          | 11      | 11-B | 200    | exp   | 0   | unif   | singleC     | OT, OT-A             |
| 497 | No          | 11      | 11-B | 200    | exp   | 0   | unif   | wholeT_0.01 | OT, OT-A             |
| 498 | No          | 11      | 11-B | 200    | exp   | 0   | unif   | wholeT_0.5  | OT, OT-A             |
| 499 | No          | 11      | 11-B | 200    | exp   | Inf | last   | singleC     | OT, OT-A             |
| 500 | No          | 11      | 11-B | 200    | exp   | Inf | last   | wholeT_0.01 | OT, OT-A             |
| 501 | No          | 11      | 11-B | 200    | exp   | Inf | last   | wholeT_0.5  | OT, OT-A             |
| 502 | No          | 11      | 11-B | 200    | exp   | Inf | unif   | singleC     | OT, OT-A             |
| 503 | No          | 11      | 11-B | 200    | exp   | Inf | unif   | wholeT_0.01 | OT, OT-A             |
| 504 | No          | 11      | 11-B | 200    | exp   | Inf | unif   | wholeT_0.5  | OT, OT-A             |
| 505 | No          | 11      | 11-B | 200    | McF_4 | 0   | last   | singleC     | OT, OT-A             |
| 506 | No          | 11      | 11-B | 200    | McF_4 | 0   | last   | wholeT_0.01 | OT, OT-A             |
| 507 | No          | 11      | 11-B | 200    | McF_4 | 0   | last   | wholeT_0.5  | OT, OT-A             |
| 508 | No          | 11      | 11-B | 200    | McF_4 | 0   | unif   | singleC     | OT, OT-A             |
| 509 | No          | 11      | 11-B | 200    | McF_4 | 0   | unif   | wholeT_0.01 | OT, OT-A             |
| 510 | No          | 11      | 11-B | 200    | McF_4 | 0   | unif   | wholeT_0.5  | OT, OT-A             |
| 511 | No          | 11      | 11-B | 200    | McF_4 | Inf | last   | singleC     | OT, OT-A             |
| 512 | No          | 11      | 11-B | 200    | McF_4 | Inf | last   | wholeT_0.01 | OT, OT-A             |
| 513 | No          | 11      | 11-B | 200    | McF_4 | Inf | last   | wholeT_0.5  | OT, OT-A             |
| 514 | No          | 11      | 11-B | 200    | McF_4 | Inf | unif   | singleC     | OT, OT-A             |
| 515 | No          | 11      | 11-B | 200    | McF_4 | Inf | unif   | wholeT_0.01 | OT, OT-A             |
| 516 | No          | 11      | 11-B | 200    | McF_4 | Inf | unif   | wholeT_0.5  | OT, OT-A             |
| 517 | No          | 11      | 11-B | 200    | McF_6 | 0   | last   | singleC     | OT                   |

Table 1: (continued)

|     | Conjunction | Drivers | Tree | S.Size | Model | sh  | S.Time | S.Type      | Best method(s) |
|-----|-------------|---------|------|--------|-------|-----|--------|-------------|----------------|
| 518 | No          | 11      | 11-B | 200    | McF_6 | 0   | last   | wholeT_0.01 | OT             |
| 519 | No          | 11      | 11-B | 200    | McF_6 | 0   | last   | wholeT_0.5  | OT             |
| 520 | No          | 11      | 11-B | 200    | McF_6 | 0   | unif   | singleC     | OT, OT-A       |
| 521 | No          | 11      | 11-B | 200    | McF_6 | 0   | unif   | wholeT_0.01 | OT, OT-A       |
| 522 | No          | 11      | 11-B | 200    | McF_6 | 0   | unif   | wholeT_0.5  | OT, OT-A       |
| 523 | No          | 11      | 11-B | 200    | McF_6 | Inf | last   | singleC     | OT             |
| 524 | No          | 11      | 11-B | 200    | McF_6 | Inf | last   | wholeT_0.01 | OT             |
| 525 | No          | 11      | 11-B | 200    | McF_6 | Inf | last   | wholeT_0.5  | OT             |
| 526 | No          | 11      | 11-B | 200    | McF_6 | Inf | unif   | singleC     | OT, OT-A       |
| 527 | No          | 11      | 11-B | 200    | McF_6 | Inf | unif   | wholeT_0.01 | OT, OT-A       |
| 528 | No          | 11      | 11-B | 200    | McF_6 | Inf | unif   | wholeT_0.5  | OT, OT-A       |
| 529 | No          | 11      | 11-B | 100    | Bozic | 0   | last   | singleC     | OT, OT-A       |
| 530 | No          | 11      | 11-B | 100    | Bozic | 0   | last   | wholeT_0.01 | OT, OT-A       |
| 531 | No          | 11      | 11-B | 100    | Bozic | 0   | last   | wholeT_0.5  | OT, OT-A       |
| 532 | No          | 11      | 11-B | 100    | Bozic | 0   | unif   | singleC     | OT, OT-A       |
| 533 | No          | 11      | 11-B | 100    | Bozic | 0   | unif   | wholeT_0.01 | OT, OT-A       |
| 534 | No          | 11      | 11-B | 100    | Bozic | 0   | unif   | wholeT_0.5  | OT, OT-A       |
| 535 | No          | 11      | 11-B | 100    | Bozic | Inf | last   | singleC     | OT, OT-A       |
| 536 | No          | 11      | 11-B | 100    | Bozic | Inf | last   | wholeT_0.01 | OT, OT-A       |
| 537 | No          | 11      | 11-B | 100    | Bozic | Inf | last   | wholeT_0.5  | OT, OT-A       |
| 538 | No          | 11      | 11-B | 100    | Bozic | Inf | unif   | singleC     | OT, OT-A       |
| 539 | No          | 11      | 11-B | 100    | Bozic | Inf | unif   | wholeT_0.01 | OT, OT-A       |
| 540 | No          | 11      | 11-B | 100    | Bozic | Inf | unif   | wholeT_0.5  | OT, OT-A       |
| 541 | No          | 11      | 11-B | 100    | exp   | 0   | last   | singleC     | OT, OT-A       |
| 542 | No          | 11      | 11-B | 100    | exp   | 0   | last   | wholeT_0.01 | OT, OT-A       |
| 543 | No          | 11      | 11-B | 100    | exp   | 0   | last   | wholeT_0.5  | OT, OT-A       |
| 544 | No          | 11      | 11-B | 100    | exp   | 0   | unif   | singleC     | OT, OT-A       |
| 545 | No          | 11      | 11-B | 100    | exp   | 0   | unif   | wholeT_0.01 | OT, OT-A       |
| 546 | No          | 11      | 11-B | 100    | exp   | 0   | unif   | wholeT_0.5  | OT, OT-A       |
| 547 | No          | 11      | 11-B | 100    | exp   | Inf | last   | singleC     | OT, OT-A       |
| 548 | No          | 11      | 11-B | 100    | exp   | Inf | last   | wholeT_0.01 | OT, OT-A       |
| 549 | No          | 11      | 11-B | 100    | exp   | Inf | last   | wholeT_0.5  | OT, OT-A       |
| 550 | No          | 11      | 11-B | 100    | exp   | Inf | unif   | singleC     | OT, OT-A       |
| 551 | No          | 11      | 11-B | 100    | exp   | Inf | unif   | wholeT_0.01 | OT, OT-A       |
| 552 | No          | 11      | 11-B | 100    | exp   | Inf | unif   | wholeT_0.5  | OT, OT-A       |
| 553 | No          | 11      | 11-B | 100    | McF_4 | 0   | last   | singleC     | OT, OT-A       |
| 554 | No          | 11      | 11-B | 100    | McF_4 | 0   | last   | wholeT_0.01 | OT, OT-A       |
| 555 | No          | 11      | 11-B | 100    | McF_4 | 0   | last   | wholeT_0.5  | OT, OT-A       |
| 556 | No          | 11      | 11-B | 100    | McF_4 | 0   | unif   | singleC     | OT, OT-A       |
| 557 | No          | 11      | 11-B | 100    | McF_4 | 0   | unif   | wholeT_0.01 | OT, OT-A       |

Table 1: (continued)

|     | Conjunction | Drivers | Tree | S.Size | Model | sh  | S.Time | S.Type      | Best method(s)         |
|-----|-------------|---------|------|--------|-------|-----|--------|-------------|------------------------|
| 558 | No          | 11      | 11-B | 100    | McF_4 | 0   | unif   | wholeT_0.5  | OT, OT-A               |
| 559 | No          | 11      | 11-B | 100    | McF_4 | Inf | last   | singleC     | OT, OT-A               |
| 560 | No          | 11      | 11-B | 100    | McF_4 | Inf | last   | wholeT_0.01 | OT, OT-A               |
| 561 | No          | 11      | 11-B | 100    | McF_4 | Inf | last   | wholeT_0.5  | OT, OT-A               |
| 562 | No          | 11      | 11-B | 100    | McF_4 | Inf | unif   | singleC     | OT, OT-A               |
| 563 | No          | 11      | 11-B | 100    | McF_4 | Inf | unif   | wholeT_0.01 | OT, OT-A               |
| 564 | No          | 11      | 11-B | 100    | McF_4 | Inf | unif   | wholeT_0.5  | OT, OT-A               |
| 565 | No          | 11      | 11-B | 100    | McF_6 | 0   | last   | singleC     | OT                     |
| 566 | No          | 11      | 11-B | 100    | McF_6 | 0   | last   | wholeT_0.01 | OT                     |
| 567 | No          | 11      | 11-B | 100    | McF_6 | 0   | last   | wholeT_0.5  | OT                     |
| 568 | No          | 11      | 11-B | 100    | McF_6 | 0   | unif   | singleC     | OT, OT-A               |
| 569 | No          | 11      | 11-B | 100    | McF_6 | 0   | unif   | wholeT_0.01 | OT, OT-A               |
| 570 | No          | 11      | 11-B | 100    | McF_6 | 0   | unif   | wholeT_0.5  | OT, OT-A               |
| 571 | No          | 11      | 11-B | 100    | McF_6 | Inf | last   | singleC     | OT                     |
| 572 | No          | 11      | 11-B | 100    | McF_6 | Inf | last   | wholeT_0.01 | OT, OT-A               |
| 573 | No          | 11      | 11-B | 100    | McF_6 | Inf | last   | wholeT_0.5  | OT                     |
| 574 | No          | 11      | 11-B | 100    | McF_6 | Inf | unif   | singleC     | OT, OT-A               |
| 575 | No          | 11      | 11-B | 100    | McF_6 | Inf | unif   | wholeT_0.01 | OT, OT-A               |
| 576 | No          | 11      | 11-B | 100    | McF_6 | Inf | unif   | wholeT_0.5  | OT, OT-A               |
| 577 | No          | 9       | 9-B  | 1000   | Bozic | 0   | last   | singleC     | OT, OT-A               |
| 578 | No          | 9       | 9-B  | 1000   | Bozic | 0   | last   | wholeT_0.01 | OT, OT-A               |
| 579 | No          | 9       | 9-B  | 1000   | Bozic | 0   | last   | wholeT_0.5  | OT, OT-A               |
| 580 | No          | 9       | 9-B  | 1000   | Bozic | 0   | unif   | singleC     | OT, OT-A               |
| 581 | No          | 9       | 9-B  | 1000   | Bozic | 0   | unif   | wholeT_0.01 | OT, OT-A               |
| 582 | No          | 9       | 9-B  | 1000   | Bozic | 0   | unif   | wholeT_0.5  | OT, OT-A               |
| 583 | No          | 9       | 9-B  | 1000   | Bozic | Inf | last   | singleC     | OT, OT-A               |
| 584 | No          | 9       | 9-B  | 1000   | Bozic | Inf | last   | wholeT_0.01 | DiP, DiP-A             |
| 585 | No          | 9       | 9-B  | 1000   | Bozic | Inf | last   | wholeT_0.5  | OT, OT-A               |
| 586 | No          | 9       | 9-B  | 1000   | Bozic | Inf | unif   | singleC     | OT, OT-A               |
| 587 | No          | 9       | 9-B  | 1000   | Bozic | Inf | unif   | wholeT_0.01 | OT, OT-A               |
| 588 | No          | 9       | 9-B  | 1000   | Bozic | Inf | unif   | wholeT_0.5  | OT, OT-A               |
| 589 | No          | 9       | 9-B  | 1000   | exp   | 0   | last   | singleC     | OT, OT-A               |
| 590 | No          | 9       | 9-B  | 1000   | exp   | 0   | last   | wholeT_0.01 | OT, OT-A               |
| 591 | No          | 9       | 9-B  | 1000   | exp   | 0   | last   | wholeT_0.5  | OT, OT-A               |
| 592 | No          | 9       | 9-B  | 1000   | exp   | 0   | unif   | singleC     | OT, OT-A               |
| 593 | No          | 9       | 9-B  | 1000   | exp   | 0   | unif   | wholeT_0.01 | OT, OT-A               |
| 594 | No          | 9       | 9-B  | 1000   | exp   | 0   | unif   | wholeT_0.5  | OT, OT-A               |
| 595 | No          | 9       | 9-B  | 1000   | exp   | Inf | last   | singleC     | OT, OT-A               |
| 596 | No          | 9       | 9-B  | 1000   | exp   | Inf | last   | wholeT_0.01 | CBN-A, DiP-A, OT, OT-A |
| 597 | No          | 9       | 9-B  | 1000   | exp   | Inf | last   | wholeT_0.5  | OT, OT-A               |

Table 1: (continued)

|     | Conjunction | Drivers | Tree | S.Size | Model | sh  | S.Time | S.Type      | Best method(s)       |
|-----|-------------|---------|------|--------|-------|-----|--------|-------------|----------------------|
| 598 | No          | 9       | 9-B  | 1000   | exp   | Inf | unif   | singleC     | OT, OT-A             |
| 599 | No          | 9       | 9-B  | 1000   | exp   | Inf | unif   | wholeT_0.01 | OT, OT-A             |
| 600 | No          | 9       | 9-B  | 1000   | exp   | Inf | unif   | wholeT_0.5  | OT, OT-A             |
| 601 | No          | 9       | 9-B  | 1000   | McF_4 | 0   | last   | singleC     | DiP-A, OT, OT-A      |
| 602 | No          | 9       | 9-B  | 1000   | McF_4 | 0   | last   | wholeT_0.01 | DiP, DiP-A, OT, OT-A |
| 603 | No          | 9       | 9-B  | 1000   | McF_4 | 0   | last   | wholeT_0.5  | OT, OT-A             |
| 604 | No          | 9       | 9-B  | 1000   | McF_4 | 0   | unif   | singleC     | OT, OT-A             |
| 605 | No          | 9       | 9-B  | 1000   | McF_4 | 0   | unif   | wholeT_0.01 | OT, OT-A             |
| 606 | No          | 9       | 9-B  | 1000   | McF_4 | 0   | unif   | wholeT_0.5  | OT, OT-A             |
| 607 | No          | 9       | 9-B  | 1000   | McF_4 | Inf | last   | singleC     | OT, OT-A             |
| 608 | No          | 9       | 9-B  | 1000   | McF_4 | Inf | last   | wholeT_0.01 | DiP, DiP-A, OT, OT-A |
| 609 | No          | 9       | 9-B  | 1000   | McF_4 | Inf | last   | wholeT_0.5  | OT, OT-A             |
| 610 | No          | 9       | 9-B  | 1000   | McF_4 | Inf | unif   | singleC     | OT, OT-A             |
| 611 | No          | 9       | 9-B  | 1000   | McF_4 | Inf | unif   | wholeT_0.01 | OT, OT-A             |
| 612 | No          | 9       | 9-B  | 1000   | McF_4 | Inf | unif   | wholeT_0.5  | OT, OT-A             |
| 613 | No          | 9       | 9-B  | 1000   | McF_6 | 0   | last   | singleC     | OT                   |
| 614 | No          | 9       | 9-B  | 1000   | McF_6 | 0   | last   | wholeT_0.01 | OT                   |
| 615 | No          | 9       | 9-B  | 1000   | McF_6 | 0   | last   | wholeT_0.5  | OT                   |
| 616 | No          | 9       | 9-B  | 1000   | McF_6 | 0   | unif   | singleC     | DiP, DiP-A, OT, OT-A |
| 617 | No          | 9       | 9-B  | 1000   | McF_6 | 0   | unif   | wholeT_0.01 | DiP, DiP-A, OT, OT-A |
| 618 | No          | 9       | 9-B  | 1000   | McF_6 | 0   | unif   | wholeT_0.5  | DiP, DiP-A, OT, OT-A |
| 619 | No          | 9       | 9-B  | 1000   | McF_6 | Inf | last   | singleC     | DiP, DiP-A, OT-A     |
| 620 | No          | 9       | 9-B  | 1000   | McF_6 | Inf | last   | wholeT_0.01 | DiP, DiP-A, OT-A     |
| 621 | No          | 9       | 9-B  | 1000   | McF_6 | Inf | last   | wholeT_0.5  | DiP, DiP-A, OT-A     |
| 622 | No          | 9       | 9-B  | 1000   | McF_6 | Inf | unif   | singleC     | DiP, DiP-A, OT, OT-A |
| 623 | No          | 9       | 9-B  | 1000   | McF_6 | Inf | unif   | wholeT_0.01 | DiP, DiP-A, OT, OT-A |
| 624 | No          | 9       | 9-B  | 1000   | McF_6 | Inf | unif   | wholeT_0.5  | DiP, DiP-A, OT, OT-A |
| 625 | No          | 9       | 9-B  | 200    | Bozic | 0   | last   | singleC     | OT, OT-A             |
| 626 | No          | 9       | 9-B  | 200    | Bozic | 0   | last   | wholeT_0.01 | OT, OT-A             |
| 627 | No          | 9       | 9-B  | 200    | Bozic | 0   | last   | wholeT_0.5  | OT, OT-A             |
| 628 | No          | 9       | 9-B  | 200    | Bozic | 0   | unif   | singleC     | OT, OT-A             |
| 629 | No          | 9       | 9-B  | 200    | Bozic | 0   | unif   | wholeT_0.01 | OT, OT-A             |
| 630 | No          | 9       | 9-B  | 200    | Bozic | 0   | unif   | wholeT_0.5  | OT, OT-A             |
| 631 | No          | 9       | 9-B  | 200    | Bozic | Inf | last   | singleC     | OT, OT-A             |
| 632 | No          | 9       | 9-B  | 200    | Bozic | Inf | last   | wholeT_0.01 | OT, OT-A             |
| 633 | No          | 9       | 9-B  | 200    | Bozic | Inf | last   | wholeT_0.5  | OT, OT-A             |
| 634 | No          | 9       | 9-B  | 200    | Bozic | Inf | unif   | singleC     | OT, OT-A             |
| 635 | No          | 9       | 9-B  | 200    | Bozic | Inf | unif   | wholeT_0.01 | OT, OT-A             |
| 636 | No          | 9       | 9-B  | 200    | Bozic | Inf | unif   | wholeT_0.5  | OT, OT-A             |
| 637 | No          | 9       | 9-B  | 200    | exp   | 0   | last   | singleC     | OT, OT-A             |

Table 1: (continued)

|     | Conjunction | Drivers | Tree | S.Size | Model | sh  | S.Time | S.Type      | Best method(s) |
|-----|-------------|---------|------|--------|-------|-----|--------|-------------|----------------|
| 638 | No          | 9       | 9-B  | 200    | exp   | 0   | last   | wholeT_0.01 | OT, OT-A       |
| 639 | No          | 9       | 9-B  | 200    | exp   | 0   | last   | wholeT_0.5  | OT, OT-A       |
| 640 | No          | 9       | 9-B  | 200    | exp   | 0   | unif   | singleC     | OT, OT-A       |
| 641 | No          | 9       | 9-B  | 200    | exp   | 0   | unif   | wholeT_0.01 | OT, OT-A       |
| 642 | No          | 9       | 9-B  | 200    | exp   | 0   | unif   | wholeT_0.5  | OT, OT-A       |
| 643 | No          | 9       | 9-B  | 200    | exp   | Inf | last   | singleC     | OT, OT-A       |
| 644 | No          | 9       | 9-B  | 200    | exp   | Inf | last   | wholeT_0.01 | OT, OT-A       |
| 645 | No          | 9       | 9-B  | 200    | exp   | Inf | last   | wholeT_0.5  | OT, OT-A       |
| 646 | No          | 9       | 9-B  | 200    | exp   | Inf | unif   | singleC     | OT, OT-A       |
| 647 | No          | 9       | 9-B  | 200    | exp   | Inf | unif   | wholeT_0.01 | OT, OT-A       |
| 648 | No          | 9       | 9-B  | 200    | exp   | Inf | unif   | wholeT_0.5  | OT, OT-A       |
| 649 | No          | 9       | 9-B  | 200    | McF_4 | 0   | last   | singleC     | OT, OT-A       |
| 650 | No          | 9       | 9-B  | 200    | McF_4 | 0   | last   | wholeT_0.01 | OT, OT-A       |
| 651 | No          | 9       | 9-B  | 200    | McF_4 | 0   | last   | wholeT_0.5  | OT, OT-A       |
| 652 | No          | 9       | 9-B  | 200    | McF_4 | 0   | unif   | singleC     | OT, OT-A       |
| 653 | No          | 9       | 9-B  | 200    | McF_4 | 0   | unif   | wholeT_0.01 | OT, OT-A       |
| 654 | No          | 9       | 9-B  | 200    | McF_4 | 0   | unif   | wholeT_0.5  | OT, OT-A       |
| 655 | No          | 9       | 9-B  | 200    | McF_4 | Inf | last   | singleC     | OT, OT-A       |
| 656 | No          | 9       | 9-B  | 200    | McF_4 | Inf | last   | wholeT_0.01 | OT, OT-A       |
| 657 | No          | 9       | 9-B  | 200    | McF_4 | Inf | last   | wholeT_0.5  | OT, OT-A       |
| 658 | No          | 9       | 9-B  | 200    | McF_4 | Inf | unif   | singleC     | OT, OT-A       |
| 659 | No          | 9       | 9-B  | 200    | McF_4 | Inf | unif   | wholeT_0.01 | OT, OT-A       |
| 660 | No          | 9       | 9-B  | 200    | McF_4 | Inf | unif   | wholeT_0.5  | OT, OT-A       |
| 661 | No          | 9       | 9-B  | 200    | McF_6 | 0   | last   | singleC     | OT, OT-A       |
| 662 | No          | 9       | 9-B  | 200    | McF_6 | 0   | last   | wholeT_0.01 | OT, OT-A       |
| 663 | No          | 9       | 9-B  | 200    | McF_6 | 0   | last   | wholeT_0.5  | OT, OT-A       |
| 664 | No          | 9       | 9-B  | 200    | McF_6 | 0   | unif   | singleC     | OT, OT-A       |
| 665 | No          | 9       | 9-B  | 200    | McF_6 | 0   | unif   | wholeT_0.01 | OT, OT-A       |
| 666 | No          | 9       | 9-B  | 200    | McF_6 | 0   | unif   | wholeT_0.5  | OT, OT-A       |
| 667 | No          | 9       | 9-B  | 200    | McF_6 | Inf | last   | singleC     | OT-A           |
| 668 | No          | 9       | 9-B  | 200    | McF_6 | Inf | last   | wholeT_0.01 | OT-A           |
| 669 | No          | 9       | 9-B  | 200    | McF_6 | Inf | last   | wholeT_0.5  | OT-A           |
| 670 | No          | 9       | 9-B  | 200    | McF_6 | Inf | unif   | singleC     | OT, OT-A       |
| 671 | No          | 9       | 9-B  | 200    | McF_6 | Inf | unif   | wholeT_0.01 | OT, OT-A       |
| 672 | No          | 9       | 9-B  | 200    | McF_6 | Inf | unif   | wholeT_0.5  | OT, OT-A       |
| 673 | No          | 9       | 9-B  | 100    | Bozic | 0   | last   | singleC     | OT, OT-A       |
| 674 | No          | 9       | 9-B  | 100    | Bozic | 0   | last   | wholeT_0.01 | OT, OT-A       |
| 675 | No          | 9       | 9-B  | 100    | Bozic | 0   | last   | wholeT_0.5  | OT, OT-A       |
| 676 | No          | 9       | 9-B  | 100    | Bozic | 0   | unif   | singleC     | OT, OT-A       |
| 677 | No          | 9       | 9-B  | 100    | Bozic | 0   | unif   | wholeT_0.01 | OT, OT-A       |

Table 1: (continued)

|     | Conjunction | Drivers | Tree | S.Size | Model | sh  | S.Time | S.Type      | Best method(s) |
|-----|-------------|---------|------|--------|-------|-----|--------|-------------|----------------|
| 678 | No          | 9       | 9-B  | 100    | Bozic | 0   | unif   | wholeT_0.5  | OT, OT-A       |
| 679 | No          | 9       | 9-B  | 100    | Bozic | Inf | last   | singleC     | OT, OT-A       |
| 680 | No          | 9       | 9-B  | 100    | Bozic | Inf | last   | wholeT_0.01 | OT, OT-A       |
| 681 | No          | 9       | 9-B  | 100    | Bozic | Inf | last   | wholeT_0.5  | OT, OT-A       |
| 682 | No          | 9       | 9-B  | 100    | Bozic | Inf | unif   | singleC     | OT, OT-A       |
| 683 | No          | 9       | 9-B  | 100    | Bozic | Inf | unif   | wholeT_0.01 | OT, OT-A       |
| 684 | No          | 9       | 9-B  | 100    | Bozic | Inf | unif   | wholeT_0.5  | OT, OT-A       |
| 685 | No          | 9       | 9-B  | 100    | exp   | 0   | last   | singleC     | OT, OT-A       |
| 686 | No          | 9       | 9-B  | 100    | exp   | 0   | last   | wholeT_0.01 | OT, OT-A       |
| 687 | No          | 9       | 9-B  | 100    | exp   | 0   | last   | wholeT_0.5  | OT, OT-A       |
| 688 | No          | 9       | 9-B  | 100    | exp   | 0   | unif   | singleC     | OT, OT-A       |
| 689 | No          | 9       | 9-B  | 100    | exp   | 0   | unif   | wholeT_0.01 | OT, OT-A       |
| 690 | No          | 9       | 9-B  | 100    | exp   | 0   | unif   | wholeT_0.5  | OT, OT-A       |
| 691 | No          | 9       | 9-B  | 100    | exp   | Inf | last   | singleC     | OT, OT-A       |
| 692 | No          | 9       | 9-B  | 100    | exp   | Inf | last   | wholeT_0.01 | OT, OT-A       |
| 693 | No          | 9       | 9-B  | 100    | exp   | Inf | last   | wholeT_0.5  | OT, OT-A       |
| 694 | No          | 9       | 9-B  | 100    | exp   | Inf | unif   | singleC     | OT, OT-A       |
| 695 | No          | 9       | 9-B  | 100    | exp   | Inf | unif   | wholeT_0.01 | OT, OT-A       |
| 696 | No          | 9       | 9-B  | 100    | exp   | Inf | unif   | wholeT_0.5  | OT, OT-A       |
| 697 | No          | 9       | 9-B  | 100    | McF_4 | 0   | last   | singleC     | OT, OT-A       |
| 698 | No          | 9       | 9-B  | 100    | McF_4 | 0   | last   | wholeT_0.01 | OT, OT-A       |
| 699 | No          | 9       | 9-B  | 100    | McF_4 | 0   | last   | wholeT_0.5  | OT, OT-A       |
| 700 | No          | 9       | 9-B  | 100    | McF_4 | 0   | unif   | singleC     | OT, OT-A       |
| 701 | No          | 9       | 9-B  | 100    | McF_4 | 0   | unif   | wholeT_0.01 | OT, OT-A       |
| 702 | No          | 9       | 9-B  | 100    | McF_4 | 0   | unif   | wholeT_0.5  | OT, OT-A       |
| 703 | No          | 9       | 9-B  | 100    | McF_4 | Inf | last   | singleC     | OT, OT-A       |
| 704 | No          | 9       | 9-B  | 100    | McF_4 | Inf | last   | wholeT_0.01 | OT, OT-A       |
| 705 | No          | 9       | 9-B  | 100    | McF_4 | Inf | last   | wholeT_0.5  | OT, OT-A       |
| 706 | No          | 9       | 9-B  | 100    | McF_4 | Inf | unif   | singleC     | OT, OT-A       |
| 707 | No          | 9       | 9-B  | 100    | McF_4 | Inf | unif   | wholeT_0.01 | OT, OT-A       |
| 708 | No          | 9       | 9-B  | 100    | McF_4 | Inf | unif   | wholeT_0.5  | OT, OT-A       |
| 709 | No          | 9       | 9-B  | 100    | McF_6 | 0   | last   | singleC     | OT, OT-A       |
| 710 | No          | 9       | 9-B  | 100    | McF_6 | 0   | last   | wholeT_0.01 | OT, OT-A       |
| 711 | No          | 9       | 9-B  | 100    | McF_6 | 0   | last   | wholeT_0.5  | OT, OT-A       |
| 712 | No          | 9       | 9-B  | 100    | McF_6 | 0   | unif   | singleC     | OT, OT-A       |
| 713 | No          | 9       | 9-B  | 100    | McF_6 | 0   | unif   | wholeT_0.01 | OT, OT-A       |
| 714 | No          | 9       | 9-B  | 100    | McF_6 | 0   | unif   | wholeT_0.5  | OT, OT-A       |
| 715 | No          | 9       | 9-B  | 100    | McF_6 | Inf | last   | singleC     | OT-A           |
| 716 | No          | 9       | 9-B  | 100    | McF_6 | Inf | last   | wholeT_0.01 | OT-A           |
| 717 | No          | 9       | 9-B  | 100    | McF_6 | Inf | last   | wholeT_0.5  | OT-A           |

Table 1: (continued)

|     | Conjunction | Drivers | Tree | S.Size | Model | sh  | S.Time | S.Type      | Best method(s)       |
|-----|-------------|---------|------|--------|-------|-----|--------|-------------|----------------------|
| 718 | No          | 9       | 9-B  | 100    | McF_6 | Inf | unif   | singleC     | OT, OT-A             |
| 719 | No          | 9       | 9-B  | 100    | McF_6 | Inf | unif   | wholeT_0.01 | OT, OT-A             |
| 720 | No          | 9       | 9-B  | 100    | McF_6 | Inf | unif   | wholeT_0.5  | OT, OT-A             |
| 721 | No          | 7       | 7-B  | 1000   | Bozic | 0   | last   | singleC     | OT-A                 |
| 722 | No          | 7       | 7-B  | 1000   | Bozic | 0   | last   | wholeT_0.01 | OT-A                 |
| 723 | No          | 7       | 7-B  | 1000   | Bozic | 0   | last   | wholeT_0.5  | OT-A                 |
| 724 | No          | 7       | 7-B  | 1000   | Bozic | 0   | unif   | singleC     | OT, OT-A             |
| 725 | No          | 7       | 7-B  | 1000   | Bozic | 0   | unif   | wholeT_0.01 | CBN-A, OT, OT-A      |
| 726 | No          | 7       | 7-B  | 1000   | Bozic | 0   | unif   | wholeT_0.5  | OT, OT-A             |
| 727 | No          | 7       | 7-B  | 1000   | Bozic | Inf | last   | singleC     | DiP-A, OT-A          |
| 728 | No          | 7       | 7-B  | 1000   | Bozic | Inf | last   | wholeT_0.01 | DiP-A, OT-A          |
| 729 | No          | 7       | 7-B  | 1000   | Bozic | Inf | last   | wholeT_0.5  | DiP-A, OT-A          |
| 730 | No          | 7       | 7-B  | 1000   | Bozic | Inf | unif   | singleC     | CBN, CBN-A, OT, OT-A |
| 731 | No          | 7       | 7-B  | 1000   | Bozic | Inf | unif   | wholeT_0.01 | OT, OT-A             |
| 732 | No          | 7       | 7-B  | 1000   | Bozic | Inf | unif   | wholeT_0.5  | CBN, CBN-A           |
| 733 | No          | 7       | 7-B  | 1000   | exp   | 0   | last   | singleC     | OT-A                 |
| 734 | No          | 7       | 7-B  | 1000   | exp   | 0   | last   | wholeT_0.01 | OT-A                 |
| 735 | No          | 7       | 7-B  | 1000   | exp   | 0   | last   | wholeT_0.5  | OT-A                 |
| 736 | No          | 7       | 7-B  | 1000   | exp   | 0   | unif   | singleC     | OT, OT-A             |
| 737 | No          | 7       | 7-B  | 1000   | exp   | 0   | unif   | wholeT_0.01 | CBN, CBN-A, OT, OT-A |
| 738 | No          | 7       | 7-B  | 1000   | exp   | 0   | unif   | wholeT_0.5  | OT, OT-A             |
| 739 | No          | 7       | 7-B  | 1000   | exp   | Inf | last   | singleC     | OT-A                 |
| 740 | No          | 7       | 7-B  | 1000   | exp   | Inf | last   | wholeT_0.01 | OT-A                 |
| 741 | No          | 7       | 7-B  | 1000   | exp   | Inf | last   | wholeT_0.5  | OT-A                 |
| 742 | No          | 7       | 7-B  | 1000   | exp   | Inf | unif   | singleC     | CBN, OT, OT-A        |
| 743 | No          | 7       | 7-B  | 1000   | exp   | Inf | unif   | wholeT_0.01 | OT, OT-A             |
| 744 | No          | 7       | 7-B  | 1000   | exp   | Inf | unif   | wholeT_0.5  | OT, OT-A             |
| 745 | No          | 7       | 7-B  | 1000   | McF_4 | 0   | last   | singleC     | DiP-A, OT-A          |
| 746 | No          | 7       | 7-B  | 1000   | McF_4 | 0   | last   | wholeT_0.01 | DiP-A, OT-A          |
| 747 | No          | 7       | 7-B  | 1000   | McF_4 | 0   | last   | wholeT_0.5  | DiP-A, OT-A          |
| 748 | No          | 7       | 7-B  | 1000   | McF_4 | 0   | unif   | singleC     | DiP-A, OT, OT-A      |
| 749 | No          | 7       | 7-B  | 1000   | McF_4 | 0   | unif   | wholeT_0.01 | DiP-A, OT, OT-A      |
| 750 | No          | 7       | 7-B  | 1000   | McF_4 | 0   | unif   | wholeT_0.5  | DiP-A, OT, OT-A      |
| 751 | No          | 7       | 7-B  | 1000   | McF_4 | Inf | last   | singleC     | DiP-A, OT-A          |
| 752 | No          | 7       | 7-B  | 1000   | McF_4 | Inf | last   | wholeT_0.01 | DiP-A, OT-A          |
| 753 | No          | 7       | 7-B  | 1000   | McF_4 | Inf | last   | wholeT_0.5  | DiP-A, OT-A          |
| 754 | No          | 7       | 7-B  | 1000   | McF_4 | Inf | unif   | singleC     | OT, OT-A             |
| 755 | No          | 7       | 7-B  | 1000   | McF_4 | Inf | unif   | wholeT_0.01 | OT, OT-A             |
| 756 | No          | 7       | 7-B  | 1000   | McF_4 | Inf | unif   | wholeT_0.5  | OT, OT-A             |
| 757 | No          | 7       | 7-B  | 1000   | McF_6 | 0   | last   | singleC     | DiP-A, OT-A          |

Table 1: (continued)

|     | Conjunction | Drivers | Tree | S.Size | Model | sh  | S.Time | S.Type      | Best method(s)       |
|-----|-------------|---------|------|--------|-------|-----|--------|-------------|----------------------|
| 758 | No          | 7       | 7-B  | 1000   | McF_6 | 0   | last   | wholeT_0.01 | DiP-A, OT-A          |
| 759 | No          | 7       | 7-B  | 1000   | McF_6 | 0   | last   | wholeT_0.5  | DiP-A, OT-A          |
| 760 | No          | 7       | 7-B  | 1000   | McF_6 | 0   | unif   | singleC     | DiP, DiP-A, OT, OT-A |
| 761 | No          | 7       | 7-B  | 1000   | McF_6 | 0   | unif   | wholeT_0.01 | DiP, DiP-A, OT, OT-A |
| 762 | No          | 7       | 7-B  | 1000   | McF_6 | 0   | unif   | wholeT_0.5  | DiP, DiP-A, OT, OT-A |
| 763 | No          | 7       | 7-B  | 1000   | McF_6 | Inf | last   | singleC     | DiP-A, OT-A          |
| 764 | No          | 7       | 7-B  | 1000   | McF_6 | Inf | last   | wholeT_0.01 | DiP-A, OT-A          |
| 765 | No          | 7       | 7-B  | 1000   | McF_6 | Inf | last   | wholeT_0.5  | DiP-A, OT-A          |
| 766 | No          | 7       | 7-B  | 1000   | McF_6 | Inf | unif   | singleC     | DiP-A, OT, OT-A      |
| 767 | No          | 7       | 7-B  | 1000   | McF_6 | Inf | unif   | wholeT_0.01 | DiP-A, OT, OT-A      |
| 768 | No          | 7       | 7-B  | 1000   | McF_6 | Inf | unif   | wholeT_0.5  | DiP-A, OT, OT-A      |
| 769 | No          | 7       | 7-B  | 200    | Bozic | 0   | last   | singleC     | OT-A                 |
| 770 | No          | 7       | 7-B  | 200    | Bozic | 0   | last   | wholeT_0.01 | OT-A                 |
| 771 | No          | 7       | 7-B  | 200    | Bozic | 0   | last   | wholeT_0.5  | OT-A                 |
| 772 | No          | 7       | 7-B  | 200    | Bozic | 0   | unif   | singleC     | OT, OT-A             |
| 773 | No          | 7       | 7-B  | 200    | Bozic | 0   | unif   | wholeT_0.01 | CBN, CBN-A, OT, OT-A |
| 774 | No          | 7       | 7-B  | 200    | Bozic | 0   | unif   | wholeT_0.5  | OT, OT-A             |
| 775 | No          | 7       | 7-B  | 200    | Bozic | Inf | last   | singleC     | OT-A                 |
| 776 | No          | 7       | 7-B  | 200    | Bozic | Inf | last   | wholeT_0.01 | OT-A                 |
| 777 | No          | 7       | 7-B  | 200    | Bozic | Inf | last   | wholeT_0.5  | OT-A                 |
| 778 | No          | 7       | 7-B  | 200    | Bozic | Inf | unif   | singleC     | CBN, CBN-A, OT, OT-A |
| 779 | No          | 7       | 7-B  | 200    | Bozic | Inf | unif   | wholeT_0.01 | OT, OT-A             |
| 780 | No          | 7       | 7-B  | 200    | Bozic | Inf | unif   | wholeT_0.5  | CBN, CBN-A, OT, OT-A |
| 781 | No          | 7       | 7-B  | 200    | exp   | 0   | last   | singleC     | OT-A                 |
| 782 | No          | 7       | 7-B  | 200    | exp   | 0   | last   | wholeT_0.01 | OT-A                 |
| 783 | No          | 7       | 7-B  | 200    | exp   | 0   | last   | wholeT_0.5  | OT-A                 |
| 784 | No          | 7       | 7-B  | 200    | exp   | 0   | unif   | singleC     | OT, OT-A             |
| 785 | No          | 7       | 7-B  | 200    | exp   | 0   | unif   | wholeT_0.01 | OT, OT-A             |
| 786 | No          | 7       | 7-B  | 200    | exp   | 0   | unif   | wholeT_0.5  | OT, OT-A             |
| 787 | No          | 7       | 7-B  | 200    | exp   | Inf | last   | singleC     | OT-A                 |
| 788 | No          | 7       | 7-B  | 200    | exp   | Inf | last   | wholeT_0.01 | OT-A                 |
| 789 | No          | 7       | 7-B  | 200    | exp   | Inf | last   | wholeT_0.5  | OT-A                 |
| 790 | No          | 7       | 7-B  | 200    | exp   | Inf | unif   | singleC     | CBN, CBN-A, OT, OT-A |
| 791 | No          | 7       | 7-B  | 200    | exp   | Inf | unif   | wholeT_0.01 | OT, OT-A             |
| 792 | No          | 7       | 7-B  | 200    | exp   | Inf | unif   | wholeT_0.5  | OT, OT-A             |
| 793 | No          | 7       | 7-B  | 200    | McF_4 | 0   | last   | singleC     | OT-A                 |
| 794 | No          | 7       | 7-B  | 200    | McF_4 | 0   | last   | wholeT_0.01 | OT-A                 |
| 795 | No          | 7       | 7-B  | 200    | McF_4 | 0   | last   | wholeT_0.5  | OT-A                 |
| 796 | No          | 7       | 7-B  | 200    | McF_4 | 0   | unif   | singleC     | OT, OT-A             |
| 797 | No          | 7       | 7-B  | 200    | McF_4 | 0   | unif   | wholeT_0.01 | OT, OT-A             |



Table 1: (continued)

|     | Conjunction | Drivers | Tree | S.Size | Model | sh  | S.Time | S.Type      | Best method(s)       |
|-----|-------------|---------|------|--------|-------|-----|--------|-------------|----------------------|
| 798 | No          | 7       | 7-B  | 200    | McF_4 | 0   | unif   | wholeT_0.5  | OT, OT-A             |
| 799 | No          | 7       | 7-B  | 200    | McF_4 | Inf | last   | singleC     | OT-A                 |
| 800 | No          | 7       | 7-B  | 200    | McF_4 | Inf | last   | wholeT_0.01 | OT-A                 |
| 801 | No          | 7       | 7-B  | 200    | McF_4 | Inf | last   | wholeT_0.5  | OT-A                 |
| 802 | No          | 7       | 7-B  | 200    | McF_4 | Inf | unif   | singleC     | OT, OT-A             |
| 803 | No          | 7       | 7-B  | 200    | McF_4 | Inf | unif   | wholeT_0.01 | OT, OT-A             |
| 804 | No          | 7       | 7-B  | 200    | McF_4 | Inf | unif   | wholeT_0.5  | OT, OT-A             |
| 805 | No          | 7       | 7-B  | 200    | McF_6 | 0   | last   | singleC     | OT-A                 |
| 806 | No          | 7       | 7-B  | 200    | McF_6 | 0   | last   | wholeT_0.01 | OT-A                 |
| 807 | No          | 7       | 7-B  | 200    | McF_6 | 0   | last   | wholeT_0.5  | OT-A                 |
| 808 | No          | 7       | 7-B  | 200    | McF_6 | 0   | unif   | singleC     | OT, OT-A             |
| 809 | No          | 7       | 7-B  | 200    | McF_6 | 0   | unif   | wholeT_0.01 | OT, OT-A             |
| 810 | No          | 7       | 7-B  | 200    | McF_6 | 0   | unif   | wholeT_0.5  | CBN-A, OT, OT-A      |
| 811 | No          | 7       | 7-B  | 200    | McF_6 | Inf | last   | singleC     | OT-A                 |
| 812 | No          | 7       | 7-B  | 200    | McF_6 | Inf | last   | wholeT_0.01 | OT-A                 |
| 813 | No          | 7       | 7-B  | 200    | McF_6 | Inf | last   | wholeT_0.5  | OT-A                 |
| 814 | No          | 7       | 7-B  | 200    | McF_6 | Inf | unif   | singleC     | OT, OT-A             |
| 815 | No          | 7       | 7-B  | 200    | McF_6 | Inf | unif   | wholeT_0.01 | CBN-A, OT, OT-A      |
| 816 | No          | 7       | 7-B  | 200    | McF_6 | Inf | unif   | wholeT_0.5  | CBN-A, OT, OT-A      |
| 817 | No          | 7       | 7-B  | 100    | Bozic | 0   | last   | singleC     | OT-A                 |
| 818 | No          | 7       | 7-B  | 100    | Bozic | 0   | last   | wholeT_0.01 | OT-A                 |
| 819 | No          | 7       | 7-B  | 100    | Bozic | 0   | last   | wholeT_0.5  | OT-A                 |
| 820 | No          | 7       | 7-B  | 100    | Bozic | 0   | unif   | singleC     | OT, OT-A             |
| 821 | No          | 7       | 7-B  | 100    | Bozic | 0   | unif   | wholeT_0.01 | CBN-A, OT, OT-A      |
| 822 | No          | 7       | 7-B  | 100    | Bozic | 0   | unif   | wholeT_0.5  | OT, OT-A             |
| 823 | No          | 7       | 7-B  | 100    | Bozic | Inf | last   | singleC     | OT-A                 |
| 824 | No          | 7       | 7-B  | 100    | Bozic | Inf | last   | wholeT_0.01 | OT-A                 |
| 825 | No          | 7       | 7-B  | 100    | Bozic | Inf | last   | wholeT_0.5  | OT-A                 |
| 826 | No          | 7       | 7-B  | 100    | Bozic | Inf | unif   | singleC     | CBN, CBN-A, OT, OT-A |
| 827 | No          | 7       | 7-B  | 100    | Bozic | Inf | unif   | wholeT_0.01 | OT, OT-A             |
| 828 | No          | 7       | 7-B  | 100    | Bozic | Inf | unif   | wholeT_0.5  | CBN, CBN-A, OT, OT-A |
| 829 | No          | 7       | 7-B  | 100    | exp   | 0   | last   | singleC     | OT-A                 |
| 830 | No          | 7       | 7-B  | 100    | exp   | 0   | last   | wholeT_0.01 | OT-A                 |
| 831 | No          | 7       | 7-B  | 100    | exp   | 0   | last   | wholeT_0.5  | OT-A                 |
| 832 | No          | 7       | 7-B  | 100    | exp   | 0   | unif   | singleC     | OT, OT-A             |
| 833 | No          | 7       | 7-B  | 100    | exp   | 0   | unif   | wholeT_0.01 | OT, OT-A             |
| 834 | No          | 7       | 7-B  | 100    | exp   | 0   | unif   | wholeT_0.5  | OT, OT-A             |
| 835 | No          | 7       | 7-B  | 100    | exp   | Inf | last   | singleC     | OT-A                 |
| 836 | No          | 7       | 7-B  | 100    | exp   | Inf | last   | wholeT_0.01 | OT-A                 |
| 837 | No          | 7       | 7-B  | 100    | exp   | Inf | last   | wholeT_0.5  | OT-A                 |

Table 1: (continued)

|     | Conjunction | Drivers | Tree | S.Size | Model | sh  | S.Time | S.Type      | Best method(s)  |
|-----|-------------|---------|------|--------|-------|-----|--------|-------------|-----------------|
| 838 | No          | 7       | 7-B  | 100    | exp   | Inf | unif   | singleC     | OT, OT-A        |
| 839 | No          | 7       | 7-B  | 100    | exp   | Inf | unif   | wholeT_0.01 | CBN, OT, OT-A   |
| 840 | No          | 7       | 7-B  | 100    | exp   | Inf | unif   | wholeT_0.5  | OT, OT-A        |
| 841 | No          | 7       | 7-B  | 100    | McF_4 | 0   | last   | singleC     | OT-A            |
| 842 | No          | 7       | 7-B  | 100    | McF_4 | 0   | last   | wholeT_0.01 | OT-A            |
| 843 | No          | 7       | 7-B  | 100    | McF_4 | 0   | last   | wholeT_0.5  | OT-A            |
| 844 | No          | 7       | 7-B  | 100    | McF_4 | 0   | unif   | singleC     | OT, OT-A        |
| 845 | No          | 7       | 7-B  | 100    | McF_4 | 0   | unif   | wholeT_0.01 | OT, OT-A        |
| 846 | No          | 7       | 7-B  | 100    | McF_4 | 0   | unif   | wholeT_0.5  | OT, OT-A        |
| 847 | No          | 7       | 7-B  | 100    | McF_4 | Inf | last   | singleC     | OT-A            |
| 848 | No          | 7       | 7-B  | 100    | McF_4 | Inf | last   | wholeT_0.01 | OT-A            |
| 849 | No          | 7       | 7-B  | 100    | McF_4 | Inf | last   | wholeT_0.5  | OT-A            |
| 850 | No          | 7       | 7-B  | 100    | McF_4 | Inf | unif   | singleC     | OT, OT-A        |
| 851 | No          | 7       | 7-B  | 100    | McF_4 | Inf | unif   | wholeT_0.01 | OT, OT-A        |
| 852 | No          | 7       | 7-B  | 100    | McF_4 | Inf | unif   | wholeT_0.5  | OT, OT-A        |
| 853 | No          | 7       | 7-B  | 100    | McF_6 | 0   | last   | singleC     | OT-A            |
| 854 | No          | 7       | 7-B  | 100    | McF_6 | 0   | last   | wholeT_0.01 | OT-A            |
| 855 | No          | 7       | 7-B  | 100    | McF_6 | 0   | last   | wholeT_0.5  | OT-A            |
| 856 | No          | 7       | 7-B  | 100    | McF_6 | 0   | unif   | singleC     | CBN-A, OT, OT-A |
| 857 | No          | 7       | 7-B  | 100    | McF_6 | 0   | unif   | wholeT_0.01 | CBN-A, OT, OT-A |
| 858 | No          | 7       | 7-B  | 100    | McF_6 | 0   | unif   | wholeT_0.5  | CBN-A, OT, OT-A |
| 859 | No          | 7       | 7-B  | 100    | McF_6 | Inf | last   | singleC     | OT-A            |
| 860 | No          | 7       | 7-B  | 100    | McF_6 | Inf | last   | wholeT_0.01 | OT-A            |
| 861 | No          | 7       | 7-B  | 100    | McF_6 | Inf | last   | wholeT_0.5  | OT-A            |
| 862 | No          | 7       | 7-B  | 100    | McF_6 | Inf | unif   | singleC     | CBN-A, OT-A     |
| 863 | No          | 7       | 7-B  | 100    | McF_6 | Inf | unif   | wholeT_0.01 | CBN-A, OT-A     |
| 864 | No          | 7       | 7-B  | 100    | McF_6 | Inf | unif   | wholeT_0.5  | CBN-A, OT, OT-A |

## 2.2 Confidence sets (MCB-2), PFD, Drivers Known

Table 2: Confidence sets (method MCB-2) when Drivers are Known for measure PFD.

|    | Conjunction | Drivers | Tree | S.Size | Model | sh  | S.Time | S.Type      | Best method(s)       |
|----|-------------|---------|------|--------|-------|-----|--------|-------------|----------------------|
| 1  | Yes         | 11      | 11-A | 1000   | Bozic | 0   | last   | singleC     | OT, OT-A             |
| 2  | Yes         | 11      | 11-A | 1000   | Bozic | 0   | last   | wholeT_0.01 | DiP, DiP-A           |
| 3  | Yes         | 11      | 11-A | 1000   | Bozic | 0   | last   | wholeT_0.5  | OT, OT-A             |
| 4  | Yes         | 11      | 11-A | 1000   | Bozic | 0   | unif   | singleC     | DiP, DiP-A           |
| 5  | Yes         | 11      | 11-A | 1000   | Bozic | 0   | unif   | wholeT_0.01 | DiP-A, OT, OT-A      |
| 6  | Yes         | 11      | 11-A | 1000   | Bozic | 0   | unif   | wholeT_0.5  | OT, OT-A             |
| 7  | Yes         | 11      | 11-A | 1000   | Bozic | Inf | last   | singleC     | OT, OT-A             |
| 8  | Yes         | 11      | 11-A | 1000   | Bozic | Inf | last   | wholeT_0.01 | DiP, DiP-A           |
| 9  | Yes         | 11      | 11-A | 1000   | Bozic | Inf | last   | wholeT_0.5  | OT, OT-A             |
| 10 | Yes         | 11      | 11-A | 1000   | Bozic | Inf | unif   | singleC     | OT, OT-A             |
| 11 | Yes         | 11      | 11-A | 1000   | Bozic | Inf | unif   | wholeT_0.01 | OT, OT-A             |
| 12 | Yes         | 11      | 11-A | 1000   | Bozic | Inf | unif   | wholeT_0.5  | OT, OT-A             |
| 13 | Yes         | 11      | 11-A | 1000   | exp   | 0   | last   | singleC     | OT, OT-A             |
| 14 | Yes         | 11      | 11-A | 1000   | exp   | 0   | last   | wholeT_0.01 | DiP-A, OT, OT-A      |
| 15 | Yes         | 11      | 11-A | 1000   | exp   | 0   | last   | wholeT_0.5  | OT, OT-A             |
| 16 | Yes         | 11      | 11-A | 1000   | exp   | 0   | unif   | singleC     | OT, OT-A             |
| 17 | Yes         | 11      | 11-A | 1000   | exp   | 0   | unif   | wholeT_0.01 | DiP-A                |
| 18 | Yes         | 11      | 11-A | 1000   | exp   | 0   | unif   | wholeT_0.5  | OT, OT-A             |
| 19 | Yes         | 11      | 11-A | 1000   | exp   | Inf | last   | singleC     | OT, OT-A             |
| 20 | Yes         | 11      | 11-A | 1000   | exp   | Inf | last   | wholeT_0.01 | OT, OT-A             |
| 21 | Yes         | 11      | 11-A | 1000   | exp   | Inf | last   | wholeT_0.5  | OT, OT-A             |
| 22 | Yes         | 11      | 11-A | 1000   | exp   | Inf | unif   | singleC     | OT, OT-A             |
| 23 | Yes         | 11      | 11-A | 1000   | exp   | Inf | unif   | wholeT_0.01 | OT, OT-A             |
| 24 | Yes         | 11      | 11-A | 1000   | exp   | Inf | unif   | wholeT_0.5  | OT, OT-A             |
| 25 | Yes         | 11      | 11-A | 1000   | McF_4 | 0   | last   | singleC     | DiP-A, OT, OT-A      |
| 26 | Yes         | 11      | 11-A | 1000   | McF_4 | 0   | last   | wholeT_0.01 | DiP-A, OT, OT-A      |
| 27 | Yes         | 11      | 11-A | 1000   | McF_4 | 0   | last   | wholeT_0.5  | DiP-A, OT, OT-A      |
| 28 | Yes         | 11      | 11-A | 1000   | McF_4 | 0   | unif   | singleC     | DiP, DiP-A, OT, OT-A |
| 29 | Yes         | 11      | 11-A | 1000   | McF_4 | 0   | unif   | wholeT_0.01 | DiP-A                |
| 30 | Yes         | 11      | 11-A | 1000   | McF_4 | 0   | unif   | wholeT_0.5  | DiP, DiP-A           |
| 31 | Yes         | 11      | 11-A | 1000   | McF_4 | Inf | last   | singleC     | OT, OT-A             |
| 32 | Yes         | 11      | 11-A | 1000   | McF_4 | Inf | last   | wholeT_0.01 | OT, OT-A             |
| 33 | Yes         | 11      | 11-A | 1000   | McF_4 | Inf | last   | wholeT_0.5  | DiP-A, OT, OT-A      |
| 34 | Yes         | 11      | 11-A | 1000   | McF_4 | Inf | unif   | singleC     | DiP, DiP-A, OT, OT-A |
| 35 | Yes         | 11      | 11-A | 1000   | McF_4 | Inf | unif   | wholeT_0.01 | DiP-A, OT, OT-A      |
| 36 | Yes         | 11      | 11-A | 1000   | McF_4 | Inf | unif   | wholeT_0.5  | DiP, DiP-A, OT, OT-A |
| 37 | Yes         | 11      | 11-A | 1000   | McF_6 | 0   | last   | singleC     | DiP, OT              |

Table 2: (continued)

|    | Conjunction | Drivers | Tree | S.Size | Model | sh  | S.Time | S.Type      | Best method(s)       |
|----|-------------|---------|------|--------|-------|-----|--------|-------------|----------------------|
| 38 | Yes         | 11      | 11-A | 1000   | McF_6 | 0   | last   | wholeT_0.01 | DiP, OT              |
| 39 | Yes         | 11      | 11-A | 1000   | McF_6 | 0   | last   | wholeT_0.5  | DiP, OT              |
| 40 | Yes         | 11      | 11-A | 1000   | McF_6 | 0   | unif   | singleC     | DiP, DiP-A, OT, OT-A |
| 41 | Yes         | 11      | 11-A | 1000   | McF_6 | 0   | unif   | wholeT_0.01 | DiP, DiP-A, OT, OT-A |
| 42 | Yes         | 11      | 11-A | 1000   | McF_6 | 0   | unif   | wholeT_0.5  | DiP, DiP-A           |
| 43 | Yes         | 11      | 11-A | 1000   | McF_6 | Inf | last   | singleC     | DiP, OT              |
| 44 | Yes         | 11      | 11-A | 1000   | McF_6 | Inf | last   | wholeT_0.01 | DiP, OT              |
| 45 | Yes         | 11      | 11-A | 1000   | McF_6 | Inf | last   | wholeT_0.5  | DiP, OT              |
| 46 | Yes         | 11      | 11-A | 1000   | McF_6 | Inf | unif   | singleC     | DiP, DiP-A           |
| 47 | Yes         | 11      | 11-A | 1000   | McF_6 | Inf | unif   | wholeT_0.01 | DiP, DiP-A           |
| 48 | Yes         | 11      | 11-A | 1000   | McF_6 | Inf | unif   | wholeT_0.5  | DiP, DiP-A           |
| 49 | Yes         | 11      | 11-A | 200    | Bozic | 0   | last   | singleC     | OT, OT-A             |
| 50 | Yes         | 11      | 11-A | 200    | Bozic | 0   | last   | wholeT_0.01 | OT, OT-A             |
| 51 | Yes         | 11      | 11-A | 200    | Bozic | 0   | last   | wholeT_0.5  | OT, OT-A             |
| 52 | Yes         | 11      | 11-A | 200    | Bozic | 0   | unif   | singleC     | OT, OT-A             |
| 53 | Yes         | 11      | 11-A | 200    | Bozic | 0   | unif   | wholeT_0.01 | DiP, DiP-A, OT, OT-A |
| 54 | Yes         | 11      | 11-A | 200    | Bozic | 0   | unif   | wholeT_0.5  | OT, OT-A             |
| 55 | Yes         | 11      | 11-A | 200    | Bozic | Inf | last   | singleC     | OT, OT-A             |
| 56 | Yes         | 11      | 11-A | 200    | Bozic | Inf | last   | wholeT_0.01 | OT, OT-A             |
| 57 | Yes         | 11      | 11-A | 200    | Bozic | Inf | last   | wholeT_0.5  | OT, OT-A             |
| 58 | Yes         | 11      | 11-A | 200    | Bozic | Inf | unif   | singleC     | OT, OT-A             |
| 59 | Yes         | 11      | 11-A | 200    | Bozic | Inf | unif   | wholeT_0.01 | OT, OT-A             |
| 60 | Yes         | 11      | 11-A | 200    | Bozic | Inf | unif   | wholeT_0.5  | OT, OT-A             |
| 61 | Yes         | 11      | 11-A | 200    | exp   | 0   | last   | singleC     | OT, OT-A             |
| 62 | Yes         | 11      | 11-A | 200    | exp   | 0   | last   | wholeT_0.01 | OT, OT-A             |
| 63 | Yes         | 11      | 11-A | 200    | exp   | 0   | last   | wholeT_0.5  | OT, OT-A             |
| 64 | Yes         | 11      | 11-A | 200    | exp   | 0   | unif   | singleC     | OT, OT-A             |
| 65 | Yes         | 11      | 11-A | 200    | exp   | 0   | unif   | wholeT_0.01 | OT, OT-A             |
| 66 | Yes         | 11      | 11-A | 200    | exp   | 0   | unif   | wholeT_0.5  | CBN, CBN-A           |
| 67 | Yes         | 11      | 11-A | 200    | exp   | Inf | last   | singleC     | OT, OT-A             |
| 68 | Yes         | 11      | 11-A | 200    | exp   | Inf | last   | wholeT_0.01 | OT, OT-A             |
| 69 | Yes         | 11      | 11-A | 200    | exp   | Inf | last   | wholeT_0.5  | OT, OT-A             |
| 70 | Yes         | 11      | 11-A | 200    | exp   | Inf | unif   | singleC     | OT, OT-A             |
| 71 | Yes         | 11      | 11-A | 200    | exp   | Inf | unif   | wholeT_0.01 | OT, OT-A             |
| 72 | Yes         | 11      | 11-A | 200    | exp   | Inf | unif   | wholeT_0.5  | OT, OT-A             |
| 73 | Yes         | 11      | 11-A | 200    | McF_4 | 0   | last   | singleC     | DiP-A, OT, OT-A      |
| 74 | Yes         | 11      | 11-A | 200    | McF_4 | 0   | last   | wholeT_0.01 | DiP-A, OT, OT-A      |
| 75 | Yes         | 11      | 11-A | 200    | McF_4 | 0   | last   | wholeT_0.5  | DiP-A, OT, OT-A      |
| 76 | Yes         | 11      | 11-A | 200    | McF_4 | 0   | unif   | singleC     | OT, OT-A             |
| 77 | Yes         | 11      | 11-A | 200    | McF_4 | 0   | unif   | wholeT_0.01 | DiP, DiP-A, OT, OT-A |

Table 2: (continued)

|     | Conjunction | Drivers | Tree | S.Size | Model | sh  | S.Time | S.Type      | Best method(s)       |
|-----|-------------|---------|------|--------|-------|-----|--------|-------------|----------------------|
| 78  | Yes         | 11      | 11-A | 200    | McF_4 | 0   | unif   | wholeT_0.5  | OT, OT-A             |
| 79  | Yes         | 11      | 11-A | 200    | McF_4 | Inf | last   | singleC     | OT, OT-A             |
| 80  | Yes         | 11      | 11-A | 200    | McF_4 | Inf | last   | wholeT_0.01 | OT, OT-A             |
| 81  | Yes         | 11      | 11-A | 200    | McF_4 | Inf | last   | wholeT_0.5  | OT, OT-A             |
| 82  | Yes         | 11      | 11-A | 200    | McF_4 | Inf | unif   | singleC     | OT, OT-A             |
| 83  | Yes         | 11      | 11-A | 200    | McF_4 | Inf | unif   | wholeT_0.01 | OT, OT-A             |
| 84  | Yes         | 11      | 11-A | 200    | McF_4 | Inf | unif   | wholeT_0.5  | OT, OT-A             |
| 85  | Yes         | 11      | 11-A | 200    | McF_6 | 0   | last   | singleC     | DiP, OT              |
| 86  | Yes         | 11      | 11-A | 200    | McF_6 | 0   | last   | wholeT_0.01 | DiP, OT              |
| 87  | Yes         | 11      | 11-A | 200    | McF_6 | 0   | last   | wholeT_0.5  | DiP, OT              |
| 88  | Yes         | 11      | 11-A | 200    | McF_6 | 0   | unif   | singleC     | OT, OT-A             |
| 89  | Yes         | 11      | 11-A | 200    | McF_6 | 0   | unif   | wholeT_0.01 | DiP, DiP-A, OT, OT-A |
| 90  | Yes         | 11      | 11-A | 200    | McF_6 | 0   | unif   | wholeT_0.5  | OT, OT-A             |
| 91  | Yes         | 11      | 11-A | 200    | McF_6 | Inf | last   | singleC     | OT                   |
| 92  | Yes         | 11      | 11-A | 200    | McF_6 | Inf | last   | wholeT_0.01 | OT                   |
| 93  | Yes         | 11      | 11-A | 200    | McF_6 | Inf | last   | wholeT_0.5  | OT                   |
| 94  | Yes         | 11      | 11-A | 200    | McF_6 | Inf | unif   | singleC     | OT, OT-A             |
| 95  | Yes         | 11      | 11-A | 200    | McF_6 | Inf | unif   | wholeT_0.01 | OT, OT-A             |
| 96  | Yes         | 11      | 11-A | 200    | McF_6 | Inf | unif   | wholeT_0.5  | OT, OT-A             |
| 97  | Yes         | 11      | 11-A | 100    | Bozic | 0   | last   | singleC     | OT, OT-A             |
| 98  | Yes         | 11      | 11-A | 100    | Bozic | 0   | last   | wholeT_0.01 | OT, OT-A             |
| 99  | Yes         | 11      | 11-A | 100    | Bozic | 0   | last   | wholeT_0.5  | OT, OT-A             |
| 100 | Yes         | 11      | 11-A | 100    | Bozic | 0   | unif   | singleC     | OT, OT-A             |
| 101 | Yes         | 11      | 11-A | 100    | Bozic | 0   | unif   | wholeT_0.01 | OT, OT-A             |
| 102 | Yes         | 11      | 11-A | 100    | Bozic | 0   | unif   | wholeT_0.5  | CBN, CBN-A           |
| 103 | Yes         | 11      | 11-A | 100    | Bozic | Inf | last   | singleC     | OT, OT-A             |
| 104 | Yes         | 11      | 11-A | 100    | Bozic | Inf | last   | wholeT_0.01 | OT, OT-A             |
| 105 | Yes         | 11      | 11-A | 100    | Bozic | Inf | last   | wholeT_0.5  | OT, OT-A             |
| 106 | Yes         | 11      | 11-A | 100    | Bozic | Inf | unif   | singleC     | OT, OT-A             |
| 107 | Yes         | 11      | 11-A | 100    | Bozic | Inf | unif   | wholeT_0.01 | OT, OT-A             |
| 108 | Yes         | 11      | 11-A | 100    | Bozic | Inf | unif   | wholeT_0.5  | OT, OT-A             |
| 109 | Yes         | 11      | 11-A | 100    | exp   | 0   | last   | singleC     | OT, OT-A             |
| 110 | Yes         | 11      | 11-A | 100    | exp   | 0   | last   | wholeT_0.01 | OT, OT-A             |
| 111 | Yes         | 11      | 11-A | 100    | exp   | 0   | last   | wholeT_0.5  | OT, OT-A             |
| 112 | Yes         | 11      | 11-A | 100    | exp   | 0   | unif   | singleC     | CBN, CBN-A           |
| 113 | Yes         | 11      | 11-A | 100    | exp   | 0   | unif   | wholeT_0.01 | OT, OT-A             |
| 114 | Yes         | 11      | 11-A | 100    | exp   | 0   | unif   | wholeT_0.5  | CBN, CBN-A           |
| 115 | Yes         | 11      | 11-A | 100    | exp   | Inf | last   | singleC     | OT, OT-A             |
| 116 | Yes         | 11      | 11-A | 100    | exp   | Inf | last   | wholeT_0.01 | OT, OT-A             |
| 117 | Yes         | 11      | 11-A | 100    | exp   | Inf | last   | wholeT_0.5  | OT, OT-A             |

Table 2: (continued)

|     | Conjunction | Drivers | Tree | S.Size | Model | sh  | S.Time | S.Type      | Best method(s)       |
|-----|-------------|---------|------|--------|-------|-----|--------|-------------|----------------------|
| 118 | Yes         | 11      | 11-A | 100    | exp   | Inf | unif   | singleC     | OT, OT-A             |
| 119 | Yes         | 11      | 11-A | 100    | exp   | Inf | unif   | wholeT_0.01 | OT, OT-A             |
| 120 | Yes         | 11      | 11-A | 100    | exp   | Inf | unif   | wholeT_0.5  | OT, OT-A             |
| 121 | Yes         | 11      | 11-A | 100    | McF_4 | 0   | last   | singleC     | OT, OT-A             |
| 122 | Yes         | 11      | 11-A | 100    | McF_4 | 0   | last   | wholeT_0.01 | DiP, DiP-A, OT, OT-A |
| 123 | Yes         | 11      | 11-A | 100    | McF_4 | 0   | last   | wholeT_0.5  | OT, OT-A             |
| 124 | Yes         | 11      | 11-A | 100    | McF_4 | 0   | unif   | singleC     | OT, OT-A             |
| 125 | Yes         | 11      | 11-A | 100    | McF_4 | 0   | unif   | wholeT_0.01 | DiP, DiP-A, OT, OT-A |
| 126 | Yes         | 11      | 11-A | 100    | McF_4 | 0   | unif   | wholeT_0.5  | OT, OT-A             |
| 127 | Yes         | 11      | 11-A | 100    | McF_4 | Inf | last   | singleC     | OT, OT-A             |
| 128 | Yes         | 11      | 11-A | 100    | McF_4 | Inf | last   | wholeT_0.01 | OT, OT-A             |
| 129 | Yes         | 11      | 11-A | 100    | McF_4 | Inf | last   | wholeT_0.5  | OT, OT-A             |
| 130 | Yes         | 11      | 11-A | 100    | McF_4 | Inf | unif   | singleC     | OT, OT-A             |
| 131 | Yes         | 11      | 11-A | 100    | McF_4 | Inf | unif   | wholeT_0.01 | OT, OT-A             |
| 132 | Yes         | 11      | 11-A | 100    | McF_4 | Inf | unif   | wholeT_0.5  | OT, OT-A             |
| 133 | Yes         | 11      | 11-A | 100    | McF_6 | 0   | last   | singleC     | DiP, OT              |
| 134 | Yes         | 11      | 11-A | 100    | McF_6 | 0   | last   | wholeT_0.01 | DiP, OT              |
| 135 | Yes         | 11      | 11-A | 100    | McF_6 | 0   | last   | wholeT_0.5  | OT                   |
| 136 | Yes         | 11      | 11-A | 100    | McF_6 | 0   | unif   | singleC     | OT, OT-A             |
| 137 | Yes         | 11      | 11-A | 100    | McF_6 | 0   | unif   | wholeT_0.01 | DiP, DiP-A, OT, OT-A |
| 138 | Yes         | 11      | 11-A | 100    | McF_6 | 0   | unif   | wholeT_0.5  | OT, OT-A             |
| 139 | Yes         | 11      | 11-A | 100    | McF_6 | Inf | last   | singleC     | OT                   |
| 140 | Yes         | 11      | 11-A | 100    | McF_6 | Inf | last   | wholeT_0.01 | OT                   |
| 141 | Yes         | 11      | 11-A | 100    | McF_6 | Inf | last   | wholeT_0.5  | OT                   |
| 142 | Yes         | 11      | 11-A | 100    | McF_6 | Inf | unif   | singleC     | OT, OT-A             |
| 143 | Yes         | 11      | 11-A | 100    | McF_6 | Inf | unif   | wholeT_0.01 | OT, OT-A             |
| 144 | Yes         | 11      | 11-A | 100    | McF_6 | Inf | unif   | wholeT_0.5  | OT, OT-A             |
| 145 | Yes         | 9       | 9-A  | 1000   | Bozic | 0   | last   | singleC     | OT, OT-A             |
| 146 | Yes         | 9       | 9-A  | 1000   | Bozic | 0   | last   | wholeT_0.01 | DiP, DiP-A           |
| 147 | Yes         | 9       | 9-A  | 1000   | Bozic | 0   | last   | wholeT_0.5  | OT, OT-A             |
| 148 | Yes         | 9       | 9-A  | 1000   | Bozic | 0   | unif   | singleC     | OT, OT-A             |
| 149 | Yes         | 9       | 9-A  | 1000   | Bozic | 0   | unif   | wholeT_0.01 | DiP, DiP-A           |
| 150 | Yes         | 9       | 9-A  | 1000   | Bozic | 0   | unif   | wholeT_0.5  | OT, OT-A             |
| 151 | Yes         | 9       | 9-A  | 1000   | Bozic | Inf | last   | singleC     | OT, OT-A             |
| 152 | Yes         | 9       | 9-A  | 1000   | Bozic | Inf | last   | wholeT_0.01 | DiP, DiP-A, OT, OT-A |
| 153 | Yes         | 9       | 9-A  | 1000   | Bozic | Inf | last   | wholeT_0.5  | OT, OT-A             |
| 154 | Yes         | 9       | 9-A  | 1000   | Bozic | Inf | unif   | singleC     | DiP, DiP-A, OT, OT-A |
| 155 | Yes         | 9       | 9-A  | 1000   | Bozic | Inf | unif   | wholeT_0.01 | DiP, DiP-A, OT, OT-A |
| 156 | Yes         | 9       | 9-A  | 1000   | Bozic | Inf | unif   | wholeT_0.5  | DiP-A, OT, OT-A      |
| 157 | Yes         | 9       | 9-A  | 1000   | exp   | 0   | last   | singleC     | OT, OT-A             |

Table 2: (continued)

|     | Conjunction | Drivers | Tree | S.Size | Model | sh  | S.Time | S.Type      | Best method(s)            |
|-----|-------------|---------|------|--------|-------|-----|--------|-------------|---------------------------|
| 158 | Yes         | 9       | 9-A  | 1000   | exp   | 0   | last   | wholeT_0.01 | DiP-A, OT, OT-A           |
| 159 | Yes         | 9       | 9-A  | 1000   | exp   | 0   | last   | wholeT_0.5  | OT, OT-A                  |
| 160 | Yes         | 9       | 9-A  | 1000   | exp   | 0   | unif   | singleC     | OT, OT-A                  |
| 161 | Yes         | 9       | 9-A  | 1000   | exp   | 0   | unif   | wholeT_0.01 | OT, OT-A                  |
| 162 | Yes         | 9       | 9-A  | 1000   | exp   | 0   | unif   | wholeT_0.5  | CBN, CBN-A                |
| 163 | Yes         | 9       | 9-A  | 1000   | exp   | Inf | last   | singleC     | OT, OT-A                  |
| 164 | Yes         | 9       | 9-A  | 1000   | exp   | Inf | last   | wholeT_0.01 | CBN, DiP, DiP-A, OT, OT-A |
| 165 | Yes         | 9       | 9-A  | 1000   | exp   | Inf | last   | wholeT_0.5  | OT, OT-A                  |
| 166 | Yes         | 9       | 9-A  | 1000   | exp   | Inf | unif   | singleC     | OT, OT-A                  |
| 167 | Yes         | 9       | 9-A  | 1000   | exp   | Inf | unif   | wholeT_0.01 | OT, OT-A                  |
| 168 | Yes         | 9       | 9-A  | 1000   | exp   | Inf | unif   | wholeT_0.5  | OT, OT-A                  |
| 169 | Yes         | 9       | 9-A  | 1000   | McF_4 | 0   | last   | singleC     | DiP, DiP-A, OT, OT-A      |
| 170 | Yes         | 9       | 9-A  | 1000   | McF_4 | 0   | last   | wholeT_0.01 | DiP, DiP-A, OT, OT-A      |
| 171 | Yes         | 9       | 9-A  | 1000   | McF_4 | 0   | last   | wholeT_0.5  | DiP, DiP-A, OT, OT-A      |
| 172 | Yes         | 9       | 9-A  | 1000   | McF_4 | 0   | unif   | singleC     | DiP, DiP-A, OT, OT-A      |
| 173 | Yes         | 9       | 9-A  | 1000   | McF_4 | 0   | unif   | wholeT_0.01 | DiP, DiP-A                |
| 174 | Yes         | 9       | 9-A  | 1000   | McF_4 | 0   | unif   | wholeT_0.5  | DiP, DiP-A, OT, OT-A      |
| 175 | Yes         | 9       | 9-A  | 1000   | McF_4 | Inf | last   | singleC     | OT, OT-A                  |
| 176 | Yes         | 9       | 9-A  | 1000   | McF_4 | Inf | last   | wholeT_0.01 | DiP, OT                   |
| 177 | Yes         | 9       | 9-A  | 1000   | McF_4 | Inf | last   | wholeT_0.5  | DiP, DiP-A, OT, OT-A      |
| 178 | Yes         | 9       | 9-A  | 1000   | McF_4 | Inf | unif   | singleC     | DiP, DiP-A, OT, OT-A      |
| 179 | Yes         | 9       | 9-A  | 1000   | McF_4 | Inf | unif   | wholeT_0.01 | OT, OT-A                  |
| 180 | Yes         | 9       | 9-A  | 1000   | McF_4 | Inf | unif   | wholeT_0.5  | DiP, DiP-A, OT, OT-A      |
| 181 | Yes         | 9       | 9-A  | 1000   | McF_6 | 0   | last   | singleC     | OT                        |
| 182 | Yes         | 9       | 9-A  | 1000   | McF_6 | 0   | last   | wholeT_0.01 | DiP, OT                   |
| 183 | Yes         | 9       | 9-A  | 1000   | McF_6 | 0   | last   | wholeT_0.5  | DiP, OT                   |
| 184 | Yes         | 9       | 9-A  | 1000   | McF_6 | 0   | unif   | singleC     | DiP, DiP-A, OT, OT-A      |
| 185 | Yes         | 9       | 9-A  | 1000   | McF_6 | 0   | unif   | wholeT_0.01 | DiP, DiP-A, OT, OT-A      |
| 186 | Yes         | 9       | 9-A  | 1000   | McF_6 | 0   | unif   | wholeT_0.5  | DiP, DiP-A, OT, OT-A      |
| 187 | Yes         | 9       | 9-A  | 1000   | McF_6 | Inf | last   | singleC     | DiP, OT                   |
| 188 | Yes         | 9       | 9-A  | 1000   | McF_6 | Inf | last   | wholeT_0.01 | OT                        |
| 189 | Yes         | 9       | 9-A  | 1000   | McF_6 | Inf | last   | wholeT_0.5  | DiP, OT                   |
| 190 | Yes         | 9       | 9-A  | 1000   | McF_6 | Inf | unif   | singleC     | DiP, DiP-A, OT, OT-A      |
| 191 | Yes         | 9       | 9-A  | 1000   | McF_6 | Inf | unif   | wholeT_0.01 | DiP, DiP-A, OT, OT-A      |
| 192 | Yes         | 9       | 9-A  | 1000   | McF_6 | Inf | unif   | wholeT_0.5  | DiP, DiP-A, OT, OT-A      |
| 193 | Yes         | 9       | 9-A  | 200    | Bozic | 0   | last   | singleC     | OT, OT-A                  |
| 194 | Yes         | 9       | 9-A  | 200    | Bozic | 0   | last   | wholeT_0.01 | OT, OT-A                  |
| 195 | Yes         | 9       | 9-A  | 200    | Bozic | 0   | last   | wholeT_0.5  | OT, OT-A                  |
| 196 | Yes         | 9       | 9-A  | 200    | Bozic | 0   | unif   | singleC     | CBN                       |
| 197 | Yes         | 9       | 9-A  | 200    | Bozic | 0   | unif   | wholeT_0.01 | DiP-A, OT, OT-A           |

Table 2: (continued)

|     | Conjunction | Drivers | Tree | S.Size | Model | sh  | S.Time | S.Type      | Best method(s)       |
|-----|-------------|---------|------|--------|-------|-----|--------|-------------|----------------------|
| 198 | Yes         | 9       | 9-A  | 200    | Bozic | 0   | unif   | wholeT_0.5  | CBN, CBN-A           |
| 199 | Yes         | 9       | 9-A  | 200    | Bozic | Inf | last   | singleC     | OT, OT-A             |
| 200 | Yes         | 9       | 9-A  | 200    | Bozic | Inf | last   | wholeT_0.01 | OT, OT-A             |
| 201 | Yes         | 9       | 9-A  | 200    | Bozic | Inf | last   | wholeT_0.5  | OT, OT-A             |
| 202 | Yes         | 9       | 9-A  | 200    | Bozic | Inf | unif   | singleC     | OT, OT-A             |
| 203 | Yes         | 9       | 9-A  | 200    | Bozic | Inf | unif   | wholeT_0.01 | OT, OT-A             |
| 204 | Yes         | 9       | 9-A  | 200    | Bozic | Inf | unif   | wholeT_0.5  | OT, OT-A             |
| 205 | Yes         | 9       | 9-A  | 200    | exp   | 0   | last   | singleC     | OT, OT-A             |
| 206 | Yes         | 9       | 9-A  | 200    | exp   | 0   | last   | wholeT_0.01 | OT, OT-A             |
| 207 | Yes         | 9       | 9-A  | 200    | exp   | 0   | last   | wholeT_0.5  | OT, OT-A             |
| 208 | Yes         | 9       | 9-A  | 200    | exp   | 0   | unif   | singleC     | CBN-A                |
| 209 | Yes         | 9       | 9-A  | 200    | exp   | 0   | unif   | wholeT_0.01 | OT, OT-A             |
| 210 | Yes         | 9       | 9-A  | 200    | exp   | 0   | unif   | wholeT_0.5  | CBN, CBN-A           |
| 211 | Yes         | 9       | 9-A  | 200    | exp   | Inf | last   | singleC     | OT, OT-A             |
| 212 | Yes         | 9       | 9-A  | 200    | exp   | Inf | last   | wholeT_0.01 | OT, OT-A             |
| 213 | Yes         | 9       | 9-A  | 200    | exp   | Inf | last   | wholeT_0.5  | OT, OT-A             |
| 214 | Yes         | 9       | 9-A  | 200    | exp   | Inf | unif   | singleC     | OT, OT-A             |
| 215 | Yes         | 9       | 9-A  | 200    | exp   | Inf | unif   | wholeT_0.01 | CBN-A, OT, OT-A      |
| 216 | Yes         | 9       | 9-A  | 200    | exp   | Inf | unif   | wholeT_0.5  | OT, OT-A             |
| 217 | Yes         | 9       | 9-A  | 200    | McF_4 | 0   | last   | singleC     | DiP-A, OT, OT-A      |
| 218 | Yes         | 9       | 9-A  | 200    | McF_4 | 0   | last   | wholeT_0.01 | DiP, DiP-A           |
| 219 | Yes         | 9       | 9-A  | 200    | McF_4 | 0   | last   | wholeT_0.5  | DiP-A, OT, OT-A      |
| 220 | Yes         | 9       | 9-A  | 200    | McF_4 | 0   | unif   | singleC     | OT, OT-A             |
| 221 | Yes         | 9       | 9-A  | 200    | McF_4 | 0   | unif   | wholeT_0.01 | DiP, DiP-A           |
| 222 | Yes         | 9       | 9-A  | 200    | McF_4 | 0   | unif   | wholeT_0.5  | OT, OT-A             |
| 223 | Yes         | 9       | 9-A  | 200    | McF_4 | Inf | last   | singleC     | OT, OT-A             |
| 224 | Yes         | 9       | 9-A  | 200    | McF_4 | Inf | last   | wholeT_0.01 | OT                   |
| 225 | Yes         | 9       | 9-A  | 200    | McF_4 | Inf | last   | wholeT_0.5  | OT, OT-A             |
| 226 | Yes         | 9       | 9-A  | 200    | McF_4 | Inf | unif   | singleC     | OT, OT-A             |
| 227 | Yes         | 9       | 9-A  | 200    | McF_4 | Inf | unif   | wholeT_0.01 | OT, OT-A             |
| 228 | Yes         | 9       | 9-A  | 200    | McF_4 | Inf | unif   | wholeT_0.5  | OT, OT-A             |
| 229 | Yes         | 9       | 9-A  | 200    | McF_6 | 0   | last   | singleC     | DiP, OT              |
| 230 | Yes         | 9       | 9-A  | 200    | McF_6 | 0   | last   | wholeT_0.01 | DiP, OT              |
| 231 | Yes         | 9       | 9-A  | 200    | McF_6 | 0   | last   | wholeT_0.5  | OT                   |
| 232 | Yes         | 9       | 9-A  | 200    | McF_6 | 0   | unif   | singleC     | DiP, DiP-A, OT, OT-A |
| 233 | Yes         | 9       | 9-A  | 200    | McF_6 | 0   | unif   | wholeT_0.01 | DiP, DiP-A, OT, OT-A |
| 234 | Yes         | 9       | 9-A  | 200    | McF_6 | 0   | unif   | wholeT_0.5  | DiP, DiP-A, OT, OT-A |
| 235 | Yes         | 9       | 9-A  | 200    | McF_6 | Inf | last   | singleC     | OT                   |
| 236 | Yes         | 9       | 9-A  | 200    | McF_6 | Inf | last   | wholeT_0.01 | OT                   |
| 237 | Yes         | 9       | 9-A  | 200    | McF_6 | Inf | last   | wholeT_0.5  | OT                   |



Table 2: (continued)

|     | Conjunction | Drivers | Tree | S.Size | Model | sh  | S.Time | S.Type      | Best method(s)       |
|-----|-------------|---------|------|--------|-------|-----|--------|-------------|----------------------|
| 238 | Yes         | 9       | 9-A  | 200    | McF_6 | Inf | unif   | singleC     | DiP, DiP-A, OT, OT-A |
| 239 | Yes         | 9       | 9-A  | 200    | McF_6 | Inf | unif   | wholeT_0.01 | DiP, DiP-A, OT, OT-A |
| 240 | Yes         | 9       | 9-A  | 200    | McF_6 | Inf | unif   | wholeT_0.5  | DiP, DiP-A, OT, OT-A |
| 241 | Yes         | 9       | 9-A  | 100    | Bozic | 0   | last   | singleC     | OT, OT-A             |
| 242 | Yes         | 9       | 9-A  | 100    | Bozic | 0   | last   | wholeT_0.01 | OT, OT-A             |
| 243 | Yes         | 9       | 9-A  | 100    | Bozic | 0   | last   | wholeT_0.5  | OT, OT-A             |
| 244 | Yes         | 9       | 9-A  | 100    | Bozic | 0   | unif   | singleC     | CBN, CBN-A           |
| 245 | Yes         | 9       | 9-A  | 100    | Bozic | 0   | unif   | wholeT_0.01 | OT, OT-A             |
| 246 | Yes         | 9       | 9-A  | 100    | Bozic | 0   | unif   | wholeT_0.5  | CBN, CBN-A           |
| 247 | Yes         | 9       | 9-A  | 100    | Bozic | Inf | last   | singleC     | OT, OT-A             |
| 248 | Yes         | 9       | 9-A  | 100    | Bozic | Inf | last   | wholeT_0.01 | OT, OT-A             |
| 249 | Yes         | 9       | 9-A  | 100    | Bozic | Inf | last   | wholeT_0.5  | OT, OT-A             |
| 250 | Yes         | 9       | 9-A  | 100    | Bozic | Inf | unif   | singleC     | OT, OT-A             |
| 251 | Yes         | 9       | 9-A  | 100    | Bozic | Inf | unif   | wholeT_0.01 | OT, OT-A             |
| 252 | Yes         | 9       | 9-A  | 100    | Bozic | Inf | unif   | wholeT_0.5  | OT, OT-A             |
| 253 | Yes         | 9       | 9-A  | 100    | exp   | 0   | last   | singleC     | OT, OT-A             |
| 254 | Yes         | 9       | 9-A  | 100    | exp   | 0   | last   | wholeT_0.01 | OT, OT-A             |
| 255 | Yes         | 9       | 9-A  | 100    | exp   | 0   | last   | wholeT_0.5  | OT, OT-A             |
| 256 | Yes         | 9       | 9-A  | 100    | exp   | 0   | unif   | singleC     | CBN, CBN-A           |
| 257 | Yes         | 9       | 9-A  | 100    | exp   | 0   | unif   | wholeT_0.01 | OT, OT-A             |
| 258 | Yes         | 9       | 9-A  | 100    | exp   | 0   | unif   | wholeT_0.5  | CBN, CBN-A           |
| 259 | Yes         | 9       | 9-A  | 100    | exp   | Inf | last   | singleC     | OT, OT-A             |
| 260 | Yes         | 9       | 9-A  | 100    | exp   | Inf | last   | wholeT_0.01 | OT, OT-A             |
| 261 | Yes         | 9       | 9-A  | 100    | exp   | Inf | last   | wholeT_0.5  | OT, OT-A             |
| 262 | Yes         | 9       | 9-A  | 100    | exp   | Inf | unif   | singleC     | OT, OT-A             |
| 263 | Yes         | 9       | 9-A  | 100    | exp   | Inf | unif   | wholeT_0.01 | OT, OT-A             |
| 264 | Yes         | 9       | 9-A  | 100    | exp   | Inf | unif   | wholeT_0.5  | OT, OT-A             |
| 265 | Yes         | 9       | 9-A  | 100    | McF_4 | 0   | last   | singleC     | OT, OT-A             |
| 266 | Yes         | 9       | 9-A  | 100    | McF_4 | 0   | last   | wholeT_0.01 | DiP, DiP-A           |
| 267 | Yes         | 9       | 9-A  | 100    | McF_4 | 0   | last   | wholeT_0.5  | OT, OT-A             |
| 268 | Yes         | 9       | 9-A  | 100    | McF_4 | 0   | unif   | singleC     | OT, OT-A             |
| 269 | Yes         | 9       | 9-A  | 100    | McF_4 | 0   | unif   | wholeT_0.01 | OT, OT-A             |
| 270 | Yes         | 9       | 9-A  | 100    | McF_4 | 0   | unif   | wholeT_0.5  | OT, OT-A             |
| 271 | Yes         | 9       | 9-A  | 100    | McF_4 | Inf | last   | singleC     | OT, OT-A             |
| 272 | Yes         | 9       | 9-A  | 100    | McF_4 | Inf | last   | wholeT_0.01 | OT                   |
| 273 | Yes         | 9       | 9-A  | 100    | McF_4 | Inf | last   | wholeT_0.5  | OT, OT-A             |
| 274 | Yes         | 9       | 9-A  | 100    | McF_4 | Inf | unif   | singleC     | OT, OT-A             |
| 275 | Yes         | 9       | 9-A  | 100    | McF_4 | Inf | unif   | wholeT_0.01 | OT, OT-A             |
| 276 | Yes         | 9       | 9-A  | 100    | McF_4 | Inf | unif   | wholeT_0.5  | OT, OT-A             |
| 277 | Yes         | 9       | 9-A  | 100    | McF_6 | 0   | last   | singleC     | OT                   |

Table 2: (continued)

|     | Conjunction | Drivers | Tree | S.Size | Model | sh  | S.Time | S.Type      | Best method(s)       |
|-----|-------------|---------|------|--------|-------|-----|--------|-------------|----------------------|
| 278 | Yes         | 9       | 9-A  | 100    | McF_6 | 0   | last   | wholeT_0.01 | OT                   |
| 279 | Yes         | 9       | 9-A  | 100    | McF_6 | 0   | last   | wholeT_0.5  | OT                   |
| 280 | Yes         | 9       | 9-A  | 100    | McF_6 | 0   | unif   | singleC     | OT                   |
| 281 | Yes         | 9       | 9-A  | 100    | McF_6 | 0   | unif   | wholeT_0.01 | DiP, DiP-A, OT, OT-A |
| 282 | Yes         | 9       | 9-A  | 100    | McF_6 | 0   | unif   | wholeT_0.5  | OT, OT-A             |
| 283 | Yes         | 9       | 9-A  | 100    | McF_6 | Inf | last   | singleC     | OT                   |
| 284 | Yes         | 9       | 9-A  | 100    | McF_6 | Inf | last   | wholeT_0.01 | OT                   |
| 285 | Yes         | 9       | 9-A  | 100    | McF_6 | Inf | last   | wholeT_0.5  | OT                   |
| 286 | Yes         | 9       | 9-A  | 100    | McF_6 | Inf | unif   | singleC     | OT, OT-A             |
| 287 | Yes         | 9       | 9-A  | 100    | McF_6 | Inf | unif   | wholeT_0.01 | OT, OT-A             |
| 288 | Yes         | 9       | 9-A  | 100    | McF_6 | Inf | unif   | wholeT_0.5  | OT, OT-A             |
| 289 | Yes         | 7       | 7-A  | 1000   | Bozic | 0   | last   | singleC     | OT-A                 |
| 290 | Yes         | 7       | 7-A  | 1000   | Bozic | 0   | last   | wholeT_0.01 | DiP-A                |
| 291 | Yes         | 7       | 7-A  | 1000   | Bozic | 0   | last   | wholeT_0.5  | OT-A                 |
| 292 | Yes         | 7       | 7-A  | 1000   | Bozic | 0   | unif   | singleC     | OT, OT-A             |
| 293 | Yes         | 7       | 7-A  | 1000   | Bozic | 0   | unif   | wholeT_0.01 | CBN, CBN-A           |
| 294 | Yes         | 7       | 7-A  | 1000   | Bozic | 0   | unif   | wholeT_0.5  | OT, OT-A             |
| 295 | Yes         | 7       | 7-A  | 1000   | Bozic | Inf | last   | singleC     | DiP-A, OT, OT-A      |
| 296 | Yes         | 7       | 7-A  | 1000   | Bozic | Inf | last   | wholeT_0.01 | DiP-A, OT, OT-A      |
| 297 | Yes         | 7       | 7-A  | 1000   | Bozic | Inf | last   | wholeT_0.5  | DiP-A, OT, OT-A      |
| 298 | Yes         | 7       | 7-A  | 1000   | Bozic | Inf | unif   | singleC     | CBN, CBN-A           |
| 299 | Yes         | 7       | 7-A  | 1000   | Bozic | Inf | unif   | wholeT_0.01 | CBN, CBN-A, OT, OT-A |
| 300 | Yes         | 7       | 7-A  | 1000   | Bozic | Inf | unif   | wholeT_0.5  | CBN, CBN-A           |
| 301 | Yes         | 7       | 7-A  | 1000   | exp   | 0   | last   | singleC     | OT-A                 |
| 302 | Yes         | 7       | 7-A  | 1000   | exp   | 0   | last   | wholeT_0.01 | OT-A                 |
| 303 | Yes         | 7       | 7-A  | 1000   | exp   | 0   | last   | wholeT_0.5  | OT-A                 |
| 304 | Yes         | 7       | 7-A  | 1000   | exp   | 0   | unif   | singleC     | OT, OT-A             |
| 305 | Yes         | 7       | 7-A  | 1000   | exp   | 0   | unif   | wholeT_0.01 | CBN, CBN-A           |
| 306 | Yes         | 7       | 7-A  | 1000   | exp   | 0   | unif   | wholeT_0.5  | OT, OT-A             |
| 307 | Yes         | 7       | 7-A  | 1000   | exp   | Inf | last   | singleC     | OT-A                 |
| 308 | Yes         | 7       | 7-A  | 1000   | exp   | Inf | last   | wholeT_0.01 | DiP-A, OT-A          |
| 309 | Yes         | 7       | 7-A  | 1000   | exp   | Inf | last   | wholeT_0.5  | OT-A                 |
| 310 | Yes         | 7       | 7-A  | 1000   | exp   | Inf | unif   | singleC     | CBN, CBN-A, OT, OT-A |
| 311 | Yes         | 7       | 7-A  | 1000   | exp   | Inf | unif   | wholeT_0.01 | CBN, CBN-A           |
| 312 | Yes         | 7       | 7-A  | 1000   | exp   | Inf | unif   | wholeT_0.5  | CBN, CBN-A           |
| 313 | Yes         | 7       | 7-A  | 1000   | McF_4 | 0   | last   | singleC     | DiP-A, OT, OT-A      |
| 314 | Yes         | 7       | 7-A  | 1000   | McF_4 | 0   | last   | wholeT_0.01 | OT, OT-A             |
| 315 | Yes         | 7       | 7-A  | 1000   | McF_4 | 0   | last   | wholeT_0.5  | DiP-A, OT, OT-A      |
| 316 | Yes         | 7       | 7-A  | 1000   | McF_4 | 0   | unif   | singleC     | DiP, DiP-A           |
| 317 | Yes         | 7       | 7-A  | 1000   | McF_4 | 0   | unif   | wholeT_0.01 | DiP, DiP-A, OT       |

Table 2: (continued)

|     | Conjunction | Drivers | Tree | S.Size | Model | sh  | S.Time | S.Type      | Best method(s)                   |
|-----|-------------|---------|------|--------|-------|-----|--------|-------------|----------------------------------|
| 318 | Yes         | 7       | 7-A  | 1000   | McF_4 | 0   | unif   | wholeT_0.5  | DiP, DiP-A                       |
| 319 | Yes         | 7       | 7-A  | 1000   | McF_4 | Inf | last   | singleC     | DiP-A, OT, OT-A                  |
| 320 | Yes         | 7       | 7-A  | 1000   | McF_4 | Inf | last   | wholeT_0.01 | OT, OT-A                         |
| 321 | Yes         | 7       | 7-A  | 1000   | McF_4 | Inf | last   | wholeT_0.5  | DiP-A, OT-A                      |
| 322 | Yes         | 7       | 7-A  | 1000   | McF_4 | Inf | unif   | singleC     | DiP-A, OT, OT-A                  |
| 323 | Yes         | 7       | 7-A  | 1000   | McF_4 | Inf | unif   | wholeT_0.01 | DiP-A, OT, OT-A                  |
| 324 | Yes         | 7       | 7-A  | 1000   | McF_4 | Inf | unif   | wholeT_0.5  | DiP-A, OT, OT-A                  |
| 325 | Yes         | 7       | 7-A  | 1000   | McF_6 | 0   | last   | singleC     | DiP, OT, OT-A                    |
| 326 | Yes         | 7       | 7-A  | 1000   | McF_6 | 0   | last   | wholeT_0.01 | DiP, OT, OT-A                    |
| 327 | Yes         | 7       | 7-A  | 1000   | McF_6 | 0   | last   | wholeT_0.5  | DiP, OT, OT-A                    |
| 328 | Yes         | 7       | 7-A  | 1000   | McF_6 | 0   | unif   | singleC     | CBN, CBN-A, DiP, DiP-A, OT, OT-A |
| 329 | Yes         | 7       | 7-A  | 1000   | McF_6 | 0   | unif   | wholeT_0.01 | CBN, CBN-A, DiP, DiP-A, OT, OT-A |
| 330 | Yes         | 7       | 7-A  | 1000   | McF_6 | 0   | unif   | wholeT_0.5  | CBN, CBN-A, DiP, DiP-A, OT, OT-A |
| 331 | Yes         | 7       | 7-A  | 1000   | McF_6 | Inf | last   | singleC     | DiP, DiP-A, OT, OT-A             |
| 332 | Yes         | 7       | 7-A  | 1000   | McF_6 | Inf | last   | wholeT_0.01 | OT, OT-A                         |
| 333 | Yes         | 7       | 7-A  | 1000   | McF_6 | Inf | last   | wholeT_0.5  | DiP, OT, OT-A                    |
| 334 | Yes         | 7       | 7-A  | 1000   | McF_6 | Inf | unif   | singleC     | CBN, CBN-A, DiP, DiP-A, OT, OT-A |
| 335 | Yes         | 7       | 7-A  | 1000   | McF_6 | Inf | unif   | wholeT_0.01 | CBN, CBN-A, OT, OT-A             |
| 336 | Yes         | 7       | 7-A  | 1000   | McF_6 | Inf | unif   | wholeT_0.5  | CBN, CBN-A, DiP, DiP-A, OT, OT-A |
| 337 | Yes         | 7       | 7-A  | 200    | Bozic | 0   | last   | singleC     | OT-A                             |
| 338 | Yes         | 7       | 7-A  | 200    | Bozic | 0   | last   | wholeT_0.01 | OT-A                             |
| 339 | Yes         | 7       | 7-A  | 200    | Bozic | 0   | last   | wholeT_0.5  | OT-A                             |
| 340 | Yes         | 7       | 7-A  | 200    | Bozic | 0   | unif   | singleC     | OT, OT-A                         |
| 341 | Yes         | 7       | 7-A  | 200    | Bozic | 0   | unif   | wholeT_0.01 | CBN, CBN-A                       |
| 342 | Yes         | 7       | 7-A  | 200    | Bozic | 0   | unif   | wholeT_0.5  | OT, OT-A                         |
| 343 | Yes         | 7       | 7-A  | 200    | Bozic | Inf | last   | singleC     | OT-A                             |
| 344 | Yes         | 7       | 7-A  | 200    | Bozic | Inf | last   | wholeT_0.01 | OT-A                             |
| 345 | Yes         | 7       | 7-A  | 200    | Bozic | Inf | last   | wholeT_0.5  | OT-A                             |
| 346 | Yes         | 7       | 7-A  | 200    | Bozic | Inf | unif   | singleC     | CBN, CBN-A                       |
| 347 | Yes         | 7       | 7-A  | 200    | Bozic | Inf | unif   | wholeT_0.01 | CBN, CBN-A                       |
| 348 | Yes         | 7       | 7-A  | 200    | Bozic | Inf | unif   | wholeT_0.5  | CBN, CBN-A                       |
| 349 | Yes         | 7       | 7-A  | 200    | exp   | 0   | last   | singleC     | OT-A                             |
| 350 | Yes         | 7       | 7-A  | 200    | exp   | 0   | last   | wholeT_0.01 | OT-A                             |
| 351 | Yes         | 7       | 7-A  | 200    | exp   | 0   | last   | wholeT_0.5  | OT-A                             |
| 352 | Yes         | 7       | 7-A  | 200    | exp   | 0   | unif   | singleC     | CBN, CBN-A                       |
| 353 | Yes         | 7       | 7-A  | 200    | exp   | 0   | unif   | wholeT_0.01 | CBN, CBN-A, OT, OT-A             |
| 354 | Yes         | 7       | 7-A  | 200    | exp   | 0   | unif   | wholeT_0.5  | CBN, CBN-A                       |
| 355 | Yes         | 7       | 7-A  | 200    | exp   | Inf | last   | singleC     | OT-A                             |
| 356 | Yes         | 7       | 7-A  | 200    | exp   | Inf | last   | wholeT_0.01 | OT-A                             |
| 357 | Yes         | 7       | 7-A  | 200    | exp   | Inf | last   | wholeT_0.5  | OT-A                             |

Table 2: (continued)

|     | Conjunction | Drivers | Tree | S.Size | Model | sh  | S.Time | S.Type      | Best method(s)                   |
|-----|-------------|---------|------|--------|-------|-----|--------|-------------|----------------------------------|
| 358 | Yes         | 7       | 7-A  | 200    | exp   | Inf | unif   | singleC     | CBN, CBN-A, OT, OT-A             |
| 359 | Yes         | 7       | 7-A  | 200    | exp   | Inf | unif   | wholeT_0.01 | CBN, CBN-A                       |
| 360 | Yes         | 7       | 7-A  | 200    | exp   | Inf | unif   | wholeT_0.5  | CBN, CBN-A, OT, OT-A             |
| 361 | Yes         | 7       | 7-A  | 200    | McF_4 | 0   | last   | singleC     | OT-A                             |
| 362 | Yes         | 7       | 7-A  | 200    | McF_4 | 0   | last   | wholeT_0.01 | OT-A                             |
| 363 | Yes         | 7       | 7-A  | 200    | McF_4 | 0   | last   | wholeT_0.5  | OT-A                             |
| 364 | Yes         | 7       | 7-A  | 200    | McF_4 | 0   | unif   | singleC     | OT, OT-A                         |
| 365 | Yes         | 7       | 7-A  | 200    | McF_4 | 0   | unif   | wholeT_0.01 | DiP-A, OT, OT-A                  |
| 366 | Yes         | 7       | 7-A  | 200    | McF_4 | 0   | unif   | wholeT_0.5  | OT, OT-A                         |
| 367 | Yes         | 7       | 7-A  | 200    | McF_4 | Inf | last   | singleC     | OT-A                             |
| 368 | Yes         | 7       | 7-A  | 200    | McF_4 | Inf | last   | wholeT_0.01 | OT, OT-A                         |
| 369 | Yes         | 7       | 7-A  | 200    | McF_4 | Inf | last   | wholeT_0.5  | OT-A                             |
| 370 | Yes         | 7       | 7-A  | 200    | McF_4 | Inf | unif   | singleC     | OT, OT-A                         |
| 371 | Yes         | 7       | 7-A  | 200    | McF_4 | Inf | unif   | wholeT_0.01 | OT, OT-A                         |
| 372 | Yes         | 7       | 7-A  | 200    | McF_4 | Inf | unif   | wholeT_0.5  | OT, OT-A                         |
| 373 | Yes         | 7       | 7-A  | 200    | McF_6 | 0   | last   | singleC     | OT, OT-A                         |
| 374 | Yes         | 7       | 7-A  | 200    | McF_6 | 0   | last   | wholeT_0.01 | OT, OT-A                         |
| 375 | Yes         | 7       | 7-A  | 200    | McF_6 | 0   | last   | wholeT_0.5  | OT, OT-A                         |
| 376 | Yes         | 7       | 7-A  | 200    | McF_6 | 0   | unif   | singleC     | CBN, CBN-A, DiP-A                |
| 377 | Yes         | 7       | 7-A  | 200    | McF_6 | 0   | unif   | wholeT_0.01 | CBN, CBN-A, DiP, DiP-A, OT, OT-A |
| 378 | Yes         | 7       | 7-A  | 200    | McF_6 | 0   | unif   | wholeT_0.5  | CBN, CBN-A                       |
| 379 | Yes         | 7       | 7-A  | 200    | McF_6 | Inf | last   | singleC     | DiP-A, OT, OT-A                  |
| 380 | Yes         | 7       | 7-A  | 200    | McF_6 | Inf | last   | wholeT_0.01 | OT, OT-A                         |
| 381 | Yes         | 7       | 7-A  | 200    | McF_6 | Inf | last   | wholeT_0.5  | DiP-A, OT, OT-A                  |
| 382 | Yes         | 7       | 7-A  | 200    | McF_6 | Inf | unif   | singleC     | CBN, CBN-A                       |
| 383 | Yes         | 7       | 7-A  | 200    | McF_6 | Inf | unif   | wholeT_0.01 | CBN, CBN-A                       |
| 384 | Yes         | 7       | 7-A  | 200    | McF_6 | Inf | unif   | wholeT_0.5  | CBN, CBN-A                       |
| 385 | Yes         | 7       | 7-A  | 100    | Bozic | 0   | last   | singleC     | OT-A                             |
| 386 | Yes         | 7       | 7-A  | 100    | Bozic | 0   | last   | wholeT_0.01 | OT-A                             |
| 387 | Yes         | 7       | 7-A  | 100    | Bozic | 0   | last   | wholeT_0.5  | OT-A                             |
| 388 | Yes         | 7       | 7-A  | 100    | Bozic | 0   | unif   | singleC     | OT, OT-A                         |
| 389 | Yes         | 7       | 7-A  | 100    | Bozic | 0   | unif   | wholeT_0.01 | CBN, CBN-A                       |
| 390 | Yes         | 7       | 7-A  | 100    | Bozic | 0   | unif   | wholeT_0.5  | OT, OT-A                         |
| 391 | Yes         | 7       | 7-A  | 100    | Bozic | Inf | last   | singleC     | OT-A                             |
| 392 | Yes         | 7       | 7-A  | 100    | Bozic | Inf | last   | wholeT_0.01 | OT-A                             |
| 393 | Yes         | 7       | 7-A  | 100    | Bozic | Inf | last   | wholeT_0.5  | OT-A                             |
| 394 | Yes         | 7       | 7-A  | 100    | Bozic | Inf | unif   | singleC     | CBN, CBN-A                       |
| 395 | Yes         | 7       | 7-A  | 100    | Bozic | Inf | unif   | wholeT_0.01 | CBN, CBN-A                       |
| 396 | Yes         | 7       | 7-A  | 100    | Bozic | Inf | unif   | wholeT_0.5  | CBN, CBN-A, OT, OT-A             |
| 397 | Yes         | 7       | 7-A  | 100    | exp   | 0   | last   | singleC     | OT-A                             |

Table 2: (continued)

|     | Conjunction | Drivers | Tree | S.Size | Model | sh  | S.Time | S.Type      | Best method(s)       |
|-----|-------------|---------|------|--------|-------|-----|--------|-------------|----------------------|
| 398 | Yes         | 7       | 7-A  | 100    | exp   | 0   | last   | wholeT_0.01 | OT-A                 |
| 399 | Yes         | 7       | 7-A  | 100    | exp   | 0   | last   | wholeT_0.5  | OT-A                 |
| 400 | Yes         | 7       | 7-A  | 100    | exp   | 0   | unif   | singleC     | OT, OT-A             |
| 401 | Yes         | 7       | 7-A  | 100    | exp   | 0   | unif   | wholeT_0.01 | OT, OT-A             |
| 402 | Yes         | 7       | 7-A  | 100    | exp   | 0   | unif   | wholeT_0.5  | CBN, CBN-A           |
| 403 | Yes         | 7       | 7-A  | 100    | exp   | Inf | last   | singleC     | OT-A                 |
| 404 | Yes         | 7       | 7-A  | 100    | exp   | Inf | last   | wholeT_0.01 | OT-A                 |
| 405 | Yes         | 7       | 7-A  | 100    | exp   | Inf | last   | wholeT_0.5  | OT-A                 |
| 406 | Yes         | 7       | 7-A  | 100    | exp   | Inf | unif   | singleC     | OT, OT-A             |
| 407 | Yes         | 7       | 7-A  | 100    | exp   | Inf | unif   | wholeT_0.01 | CBN, CBN-A, OT, OT-A |
| 408 | Yes         | 7       | 7-A  | 100    | exp   | Inf | unif   | wholeT_0.5  | OT, OT-A             |
| 409 | Yes         | 7       | 7-A  | 100    | McF_4 | 0   | last   | singleC     | OT-A                 |
| 410 | Yes         | 7       | 7-A  | 100    | McF_4 | 0   | last   | wholeT_0.01 | OT-A                 |
| 411 | Yes         | 7       | 7-A  | 100    | McF_4 | 0   | last   | wholeT_0.5  | OT-A                 |
| 412 | Yes         | 7       | 7-A  | 100    | McF_4 | 0   | unif   | singleC     | OT, OT-A             |
| 413 | Yes         | 7       | 7-A  | 100    | McF_4 | 0   | unif   | wholeT_0.01 | OT, OT-A             |
| 414 | Yes         | 7       | 7-A  | 100    | McF_4 | 0   | unif   | wholeT_0.5  | OT, OT-A             |
| 415 | Yes         | 7       | 7-A  | 100    | McF_4 | Inf | last   | singleC     | OT-A                 |
| 416 | Yes         | 7       | 7-A  | 100    | McF_4 | Inf | last   | wholeT_0.01 | OT, OT-A             |
| 417 | Yes         | 7       | 7-A  | 100    | McF_4 | Inf | last   | wholeT_0.5  | OT-A                 |
| 418 | Yes         | 7       | 7-A  | 100    | McF_4 | Inf | unif   | singleC     | OT, OT-A             |
| 419 | Yes         | 7       | 7-A  | 100    | McF_4 | Inf | unif   | wholeT_0.01 | OT, OT-A             |
| 420 | Yes         | 7       | 7-A  | 100    | McF_4 | Inf | unif   | wholeT_0.5  | OT, OT-A             |
| 421 | Yes         | 7       | 7-A  | 100    | McF_6 | 0   | last   | singleC     | OT, OT-A             |
| 422 | Yes         | 7       | 7-A  | 100    | McF_6 | 0   | last   | wholeT_0.01 | OT, OT-A             |
| 423 | Yes         | 7       | 7-A  | 100    | McF_6 | 0   | last   | wholeT_0.5  | OT, OT-A             |
| 424 | Yes         | 7       | 7-A  | 100    | McF_6 | 0   | unif   | singleC     | CBN, CBN-A           |
| 425 | Yes         | 7       | 7-A  | 100    | McF_6 | 0   | unif   | wholeT_0.01 | CBN, CBN-A, DiP-A    |
| 426 | Yes         | 7       | 7-A  | 100    | McF_6 | 0   | unif   | wholeT_0.5  | CBN, CBN-A           |
| 427 | Yes         | 7       | 7-A  | 100    | McF_6 | Inf | last   | singleC     | OT, OT-A             |
| 428 | Yes         | 7       | 7-A  | 100    | McF_6 | Inf | last   | wholeT_0.01 | OT, OT-A             |
| 429 | Yes         | 7       | 7-A  | 100    | McF_6 | Inf | last   | wholeT_0.5  | OT, OT-A             |
| 430 | Yes         | 7       | 7-A  | 100    | McF_6 | Inf | unif   | singleC     | CBN, CBN-A           |
| 431 | Yes         | 7       | 7-A  | 100    | McF_6 | Inf | unif   | wholeT_0.01 | CBN, CBN-A           |
| 432 | Yes         | 7       | 7-A  | 100    | McF_6 | Inf | unif   | wholeT_0.5  | CBN, CBN-A           |
| 433 | No          | 11      | 11-B | 1000   | Bozic | 0   | last   | singleC     | OT, OT-A             |
| 434 | No          | 11      | 11-B | 1000   | Bozic | 0   | last   | wholeT_0.01 | DiP, DiP-A, OT, OT-A |
| 435 | No          | 11      | 11-B | 1000   | Bozic | 0   | last   | wholeT_0.5  | OT, OT-A             |
| 436 | No          | 11      | 11-B | 1000   | Bozic | 0   | unif   | singleC     | DiP, DiP-A, OT, OT-A |
| 437 | No          | 11      | 11-B | 1000   | Bozic | 0   | unif   | wholeT_0.01 | DiP, DiP-A, OT, OT-A |

Table 2: (continued)

|     | Conjunction | Drivers | Tree | S.Size | Model | sh  | S.Time | S.Type      | Best method(s)       |
|-----|-------------|---------|------|--------|-------|-----|--------|-------------|----------------------|
| 438 | No          | 11      | 11-B | 1000   | Bozic | 0   | unif   | wholeT_0.5  | OT, OT-A             |
| 439 | No          | 11      | 11-B | 1000   | Bozic | Inf | last   | singleC     | OT, OT-A             |
| 440 | No          | 11      | 11-B | 1000   | Bozic | Inf | last   | wholeT_0.01 | DiP-A                |
| 441 | No          | 11      | 11-B | 1000   | Bozic | Inf | last   | wholeT_0.5  | OT, OT-A             |
| 442 | No          | 11      | 11-B | 1000   | Bozic | Inf | unif   | singleC     | DiP-A, OT, OT-A      |
| 443 | No          | 11      | 11-B | 1000   | Bozic | Inf | unif   | wholeT_0.01 | OT, OT-A             |
| 444 | No          | 11      | 11-B | 1000   | Bozic | Inf | unif   | wholeT_0.5  | OT, OT-A             |
| 445 | No          | 11      | 11-B | 1000   | exp   | 0   | last   | singleC     | OT, OT-A             |
| 446 | No          | 11      | 11-B | 1000   | exp   | 0   | last   | wholeT_0.01 | DiP-A, OT, OT-A      |
| 447 | No          | 11      | 11-B | 1000   | exp   | 0   | last   | wholeT_0.5  | OT, OT-A             |
| 448 | No          | 11      | 11-B | 1000   | exp   | 0   | unif   | singleC     | OT, OT-A             |
| 449 | No          | 11      | 11-B | 1000   | exp   | 0   | unif   | wholeT_0.01 | DiP, DiP-A, OT, OT-A |
| 450 | No          | 11      | 11-B | 1000   | exp   | 0   | unif   | wholeT_0.5  | OT, OT-A             |
| 451 | No          | 11      | 11-B | 1000   | exp   | Inf | last   | singleC     | OT, OT-A             |
| 452 | No          | 11      | 11-B | 1000   | exp   | Inf | last   | wholeT_0.01 | OT, OT-A             |
| 453 | No          | 11      | 11-B | 1000   | exp   | Inf | last   | wholeT_0.5  | OT, OT-A             |
| 454 | No          | 11      | 11-B | 1000   | exp   | Inf | unif   | singleC     | OT, OT-A             |
| 455 | No          | 11      | 11-B | 1000   | exp   | Inf | unif   | wholeT_0.01 | OT, OT-A             |
| 456 | No          | 11      | 11-B | 1000   | exp   | Inf | unif   | wholeT_0.5  | OT, OT-A             |
| 457 | No          | 11      | 11-B | 1000   | McF_4 | 0   | last   | singleC     | DiP, DiP-A, OT, OT-A |
| 458 | No          | 11      | 11-B | 1000   | McF_4 | 0   | last   | wholeT_0.01 | DiP, DiP-A, OT, OT-A |
| 459 | No          | 11      | 11-B | 1000   | McF_4 | 0   | last   | wholeT_0.5  | DiP-A, OT, OT-A      |
| 460 | No          | 11      | 11-B | 1000   | McF_4 | 0   | unif   | singleC     | DiP, DiP-A           |
| 461 | No          | 11      | 11-B | 1000   | McF_4 | 0   | unif   | wholeT_0.01 | DiP-A, OT, OT-A      |
| 462 | No          | 11      | 11-B | 1000   | McF_4 | 0   | unif   | wholeT_0.5  | DiP, DiP-A, OT, OT-A |
| 463 | No          | 11      | 11-B | 1000   | McF_4 | Inf | last   | singleC     | OT, OT-A             |
| 464 | No          | 11      | 11-B | 1000   | McF_4 | Inf | last   | wholeT_0.01 | DiP, DiP-A, OT, OT-A |
| 465 | No          | 11      | 11-B | 1000   | McF_4 | Inf | last   | wholeT_0.5  | DiP-A, OT, OT-A      |
| 466 | No          | 11      | 11-B | 1000   | McF_4 | Inf | unif   | singleC     | DiP, DiP-A, OT, OT-A |
| 467 | No          | 11      | 11-B | 1000   | McF_4 | Inf | unif   | wholeT_0.01 | OT, OT-A             |
| 468 | No          | 11      | 11-B | 1000   | McF_4 | Inf | unif   | wholeT_0.5  | DiP, DiP-A, OT, OT-A |
| 469 | No          | 11      | 11-B | 1000   | McF_6 | 0   | last   | singleC     | DiP, OT              |
| 470 | No          | 11      | 11-B | 1000   | McF_6 | 0   | last   | wholeT_0.01 | DiP, OT              |
| 471 | No          | 11      | 11-B | 1000   | McF_6 | 0   | last   | wholeT_0.5  | DiP, OT              |
| 472 | No          | 11      | 11-B | 1000   | McF_6 | 0   | unif   | singleC     | DiP, DiP-A, OT, OT-A |
| 473 | No          | 11      | 11-B | 1000   | McF_6 | 0   | unif   | wholeT_0.01 | DiP, DiP-A, OT, OT-A |
| 474 | No          | 11      | 11-B | 1000   | McF_6 | 0   | unif   | wholeT_0.5  | DiP, DiP-A           |
| 475 | No          | 11      | 11-B | 1000   | McF_6 | Inf | last   | singleC     | DiP, OT              |
| 476 | No          | 11      | 11-B | 1000   | McF_6 | Inf | last   | wholeT_0.01 | DiP, OT              |
| 477 | No          | 11      | 11-B | 1000   | McF_6 | Inf | last   | wholeT_0.5  | DiP, OT              |

Table 2: (continued)

|     | Conjunction | Drivers | Tree | S.Size | Model | sh  | S.Time | S.Type      | Best method(s)       |
|-----|-------------|---------|------|--------|-------|-----|--------|-------------|----------------------|
| 478 | No          | 11      | 11-B | 1000   | McF_6 | Inf | unif   | singleC     | DiP, DiP-A           |
| 479 | No          | 11      | 11-B | 1000   | McF_6 | Inf | unif   | wholeT_0.01 | DiP, DiP-A, OT, OT-A |
| 480 | No          | 11      | 11-B | 1000   | McF_6 | Inf | unif   | wholeT_0.5  | DiP, DiP-A           |
| 481 | No          | 11      | 11-B | 200    | Bozic | 0   | last   | singleC     | OT, OT-A             |
| 482 | No          | 11      | 11-B | 200    | Bozic | 0   | last   | wholeT_0.01 | OT, OT-A             |
| 483 | No          | 11      | 11-B | 200    | Bozic | 0   | last   | wholeT_0.5  | OT, OT-A             |
| 484 | No          | 11      | 11-B | 200    | Bozic | 0   | unif   | singleC     | OT, OT-A             |
| 485 | No          | 11      | 11-B | 200    | Bozic | 0   | unif   | wholeT_0.01 | DiP, DiP-A, OT, OT-A |
| 486 | No          | 11      | 11-B | 200    | Bozic | 0   | unif   | wholeT_0.5  | OT, OT-A             |
| 487 | No          | 11      | 11-B | 200    | Bozic | Inf | last   | singleC     | OT, OT-A             |
| 488 | No          | 11      | 11-B | 200    | Bozic | Inf | last   | wholeT_0.01 | OT, OT-A             |
| 489 | No          | 11      | 11-B | 200    | Bozic | Inf | last   | wholeT_0.5  | OT, OT-A             |
| 490 | No          | 11      | 11-B | 200    | Bozic | Inf | unif   | singleC     | OT, OT-A             |
| 491 | No          | 11      | 11-B | 200    | Bozic | Inf | unif   | wholeT_0.01 | OT, OT-A             |
| 492 | No          | 11      | 11-B | 200    | Bozic | Inf | unif   | wholeT_0.5  | OT, OT-A             |
| 493 | No          | 11      | 11-B | 200    | exp   | 0   | last   | singleC     | OT, OT-A             |
| 494 | No          | 11      | 11-B | 200    | exp   | 0   | last   | wholeT_0.01 | OT, OT-A             |
| 495 | No          | 11      | 11-B | 200    | exp   | 0   | last   | wholeT_0.5  | OT, OT-A             |
| 496 | No          | 11      | 11-B | 200    | exp   | 0   | unif   | singleC     | CBN, CBN-A           |
| 497 | No          | 11      | 11-B | 200    | exp   | 0   | unif   | wholeT_0.01 | OT, OT-A             |
| 498 | No          | 11      | 11-B | 200    | exp   | 0   | unif   | wholeT_0.5  | CBN-A                |
| 499 | No          | 11      | 11-B | 200    | exp   | Inf | last   | singleC     | OT, OT-A             |
| 500 | No          | 11      | 11-B | 200    | exp   | Inf | last   | wholeT_0.01 | OT, OT-A             |
| 501 | No          | 11      | 11-B | 200    | exp   | Inf | last   | wholeT_0.5  | OT, OT-A             |
| 502 | No          | 11      | 11-B | 200    | exp   | Inf | unif   | singleC     | OT, OT-A             |
| 503 | No          | 11      | 11-B | 200    | exp   | Inf | unif   | wholeT_0.01 | OT, OT-A             |
| 504 | No          | 11      | 11-B | 200    | exp   | Inf | unif   | wholeT_0.5  | OT, OT-A             |
| 505 | No          | 11      | 11-B | 200    | McF_4 | 0   | last   | singleC     | DiP-A, OT, OT-A      |
| 506 | No          | 11      | 11-B | 200    | McF_4 | 0   | last   | wholeT_0.01 | DiP, DiP-A, OT, OT-A |
| 507 | No          | 11      | 11-B | 200    | McF_4 | 0   | last   | wholeT_0.5  | DiP-A, OT, OT-A      |
| 508 | No          | 11      | 11-B | 200    | McF_4 | 0   | unif   | singleC     | DiP, DiP-A, OT, OT-A |
| 509 | No          | 11      | 11-B | 200    | McF_4 | 0   | unif   | wholeT_0.01 | DiP, DiP-A           |
| 510 | No          | 11      | 11-B | 200    | McF_4 | 0   | unif   | wholeT_0.5  | OT, OT-A             |
| 511 | No          | 11      | 11-B | 200    | McF_4 | Inf | last   | singleC     | OT, OT-A             |
| 512 | No          | 11      | 11-B | 200    | McF_4 | Inf | last   | wholeT_0.01 | OT, OT-A             |
| 513 | No          | 11      | 11-B | 200    | McF_4 | Inf | last   | wholeT_0.5  | OT, OT-A             |
| 514 | No          | 11      | 11-B | 200    | McF_4 | Inf | unif   | singleC     | OT, OT-A             |
| 515 | No          | 11      | 11-B | 200    | McF_4 | Inf | unif   | wholeT_0.01 | OT, OT-A             |
| 516 | No          | 11      | 11-B | 200    | McF_4 | Inf | unif   | wholeT_0.5  | OT, OT-A             |
| 517 | No          | 11      | 11-B | 200    | McF_6 | 0   | last   | singleC     | DiP, OT              |

Table 2: (continued)

|     | Conjunction | Drivers | Tree | S.Size | Model | sh  | S.Time | S.Type      | Best method(s)       |
|-----|-------------|---------|------|--------|-------|-----|--------|-------------|----------------------|
| 518 | No          | 11      | 11-B | 200    | McF_6 | 0   | last   | wholeT_0.01 | DiP, OT              |
| 519 | No          | 11      | 11-B | 200    | McF_6 | 0   | last   | wholeT_0.5  | DiP, OT              |
| 520 | No          | 11      | 11-B | 200    | McF_6 | 0   | unif   | singleC     | OT, OT-A             |
| 521 | No          | 11      | 11-B | 200    | McF_6 | 0   | unif   | wholeT_0.01 | DiP, DiP-A, OT, OT-A |
| 522 | No          | 11      | 11-B | 200    | McF_6 | 0   | unif   | wholeT_0.5  | OT, OT-A             |
| 523 | No          | 11      | 11-B | 200    | McF_6 | Inf | last   | singleC     | OT                   |
| 524 | No          | 11      | 11-B | 200    | McF_6 | Inf | last   | wholeT_0.01 | DiP, OT              |
| 525 | No          | 11      | 11-B | 200    | McF_6 | Inf | last   | wholeT_0.5  | OT                   |
| 526 | No          | 11      | 11-B | 200    | McF_6 | Inf | unif   | singleC     | OT, OT-A             |
| 527 | No          | 11      | 11-B | 200    | McF_6 | Inf | unif   | wholeT_0.01 | OT, OT-A             |
| 528 | No          | 11      | 11-B | 200    | McF_6 | Inf | unif   | wholeT_0.5  | OT, OT-A             |
| 529 | No          | 11      | 11-B | 100    | Bozic | 0   | last   | singleC     | OT, OT-A             |
| 530 | No          | 11      | 11-B | 100    | Bozic | 0   | last   | wholeT_0.01 | OT, OT-A             |
| 531 | No          | 11      | 11-B | 100    | Bozic | 0   | last   | wholeT_0.5  | OT, OT-A             |
| 532 | No          | 11      | 11-B | 100    | Bozic | 0   | unif   | singleC     | OT, OT-A             |
| 533 | No          | 11      | 11-B | 100    | Bozic | 0   | unif   | wholeT_0.01 | DiP, DiP-A, OT, OT-A |
| 534 | No          | 11      | 11-B | 100    | Bozic | 0   | unif   | wholeT_0.5  | OT, OT-A             |
| 535 | No          | 11      | 11-B | 100    | Bozic | Inf | last   | singleC     | OT, OT-A             |
| 536 | No          | 11      | 11-B | 100    | Bozic | Inf | last   | wholeT_0.01 | OT, OT-A             |
| 537 | No          | 11      | 11-B | 100    | Bozic | Inf | last   | wholeT_0.5  | OT, OT-A             |
| 538 | No          | 11      | 11-B | 100    | Bozic | Inf | unif   | singleC     | OT, OT-A             |
| 539 | No          | 11      | 11-B | 100    | Bozic | Inf | unif   | wholeT_0.01 | OT, OT-A             |
| 540 | No          | 11      | 11-B | 100    | Bozic | Inf | unif   | wholeT_0.5  | OT, OT-A             |
| 541 | No          | 11      | 11-B | 100    | exp   | 0   | last   | singleC     | OT, OT-A             |
| 542 | No          | 11      | 11-B | 100    | exp   | 0   | last   | wholeT_0.01 | OT, OT-A             |
| 543 | No          | 11      | 11-B | 100    | exp   | 0   | last   | wholeT_0.5  | OT, OT-A             |
| 544 | No          | 11      | 11-B | 100    | exp   | 0   | unif   | singleC     | CBN, CBN-A           |
| 545 | No          | 11      | 11-B | 100    | exp   | 0   | unif   | wholeT_0.01 | OT, OT-A             |
| 546 | No          | 11      | 11-B | 100    | exp   | 0   | unif   | wholeT_0.5  | CBN, CBN-A           |
| 547 | No          | 11      | 11-B | 100    | exp   | Inf | last   | singleC     | OT, OT-A             |
| 548 | No          | 11      | 11-B | 100    | exp   | Inf | last   | wholeT_0.01 | OT, OT-A             |
| 549 | No          | 11      | 11-B | 100    | exp   | Inf | last   | wholeT_0.5  | OT, OT-A             |
| 550 | No          | 11      | 11-B | 100    | exp   | Inf | unif   | singleC     | OT, OT-A             |
| 551 | No          | 11      | 11-B | 100    | exp   | Inf | unif   | wholeT_0.01 | OT, OT-A             |
| 552 | No          | 11      | 11-B | 100    | exp   | Inf | unif   | wholeT_0.5  | OT, OT-A             |
| 553 | No          | 11      | 11-B | 100    | McF_4 | 0   | last   | singleC     | OT, OT-A             |
| 554 | No          | 11      | 11-B | 100    | McF_4 | 0   | last   | wholeT_0.01 | DiP, DiP-A, OT, OT-A |
| 555 | No          | 11      | 11-B | 100    | McF_4 | 0   | last   | wholeT_0.5  | OT, OT-A             |
| 556 | No          | 11      | 11-B | 100    | McF_4 | 0   | unif   | singleC     | OT, OT-A             |
| 557 | No          | 11      | 11-B | 100    | McF_4 | 0   | unif   | wholeT_0.01 | DiP, DiP-A           |



Table 2: (continued)

|     | Conjunction | Drivers | Tree | S.Size | Model | sh  | S.Time | S.Type      | Best method(s)              |
|-----|-------------|---------|------|--------|-------|-----|--------|-------------|-----------------------------|
| 558 | No          | 11      | 11-B | 100    | McF_4 | 0   | unif   | wholeT_0.5  | OT, OT-A                    |
| 559 | No          | 11      | 11-B | 100    | McF_4 | Inf | last   | singleC     | OT, OT-A                    |
| 560 | No          | 11      | 11-B | 100    | McF_4 | Inf | last   | wholeT_0.01 | OT, OT-A                    |
| 561 | No          | 11      | 11-B | 100    | McF_4 | Inf | last   | wholeT_0.5  | OT, OT-A                    |
| 562 | No          | 11      | 11-B | 100    | McF_4 | Inf | unif   | singleC     | OT, OT-A                    |
| 563 | No          | 11      | 11-B | 100    | McF_4 | Inf | unif   | wholeT_0.01 | OT, OT-A                    |
| 564 | No          | 11      | 11-B | 100    | McF_4 | Inf | unif   | wholeT_0.5  | OT, OT-A                    |
| 565 | No          | 11      | 11-B | 100    | McF_6 | 0   | last   | singleC     | OT                          |
| 566 | No          | 11      | 11-B | 100    | McF_6 | 0   | last   | wholeT_0.01 | DiP, OT                     |
| 567 | No          | 11      | 11-B | 100    | McF_6 | 0   | last   | wholeT_0.5  | OT                          |
| 568 | No          | 11      | 11-B | 100    | McF_6 | 0   | unif   | singleC     | OT, OT-A                    |
| 569 | No          | 11      | 11-B | 100    | McF_6 | 0   | unif   | wholeT_0.01 | DiP, DiP-A, OT, OT-A        |
| 570 | No          | 11      | 11-B | 100    | McF_6 | 0   | unif   | wholeT_0.5  | OT, OT-A                    |
| 571 | No          | 11      | 11-B | 100    | McF_6 | Inf | last   | singleC     | OT                          |
| 572 | No          | 11      | 11-B | 100    | McF_6 | Inf | last   | wholeT_0.01 | OT                          |
| 573 | No          | 11      | 11-B | 100    | McF_6 | Inf | last   | wholeT_0.5  | OT                          |
| 574 | No          | 11      | 11-B | 100    | McF_6 | Inf | unif   | singleC     | OT, OT-A                    |
| 575 | No          | 11      | 11-B | 100    | McF_6 | Inf | unif   | wholeT_0.01 | OT, OT-A                    |
| 576 | No          | 11      | 11-B | 100    | McF_6 | Inf | unif   | wholeT_0.5  | OT, OT-A                    |
| 577 | No          | 9       | 9-B  | 1000   | Bozic | 0   | last   | singleC     | OT, OT-A                    |
| 578 | No          | 9       | 9-B  | 1000   | Bozic | 0   | last   | wholeT_0.01 | DiP, DiP-A, OT, OT-A        |
| 579 | No          | 9       | 9-B  | 1000   | Bozic | 0   | last   | wholeT_0.5  | OT, OT-A                    |
| 580 | No          | 9       | 9-B  | 1000   | Bozic | 0   | unif   | singleC     | OT, OT-A                    |
| 581 | No          | 9       | 9-B  | 1000   | Bozic | 0   | unif   | wholeT_0.01 | DiP, DiP-A, OT, OT-A        |
| 582 | No          | 9       | 9-B  | 1000   | Bozic | 0   | unif   | wholeT_0.5  | OT, OT-A                    |
| 583 | No          | 9       | 9-B  | 1000   | Bozic | Inf | last   | singleC     | OT, OT-A                    |
| 584 | No          | 9       | 9-B  | 1000   | Bozic | Inf | last   | wholeT_0.01 | DiP, DiP-A                  |
| 585 | No          | 9       | 9-B  | 1000   | Bozic | Inf | last   | wholeT_0.5  | OT, OT-A                    |
| 586 | No          | 9       | 9-B  | 1000   | Bozic | Inf | unif   | singleC     | DiP, DiP-A, OT, OT-A        |
| 587 | No          | 9       | 9-B  | 1000   | Bozic | Inf | unif   | wholeT_0.01 | OT, OT-A                    |
| 588 | No          | 9       | 9-B  | 1000   | Bozic | Inf | unif   | wholeT_0.5  | OT, OT-A                    |
| 589 | No          | 9       | 9-B  | 1000   | exp   | 0   | last   | singleC     | OT, OT-A                    |
| 590 | No          | 9       | 9-B  | 1000   | exp   | 0   | last   | wholeT_0.01 | DiP-A, OT, OT-A             |
| 591 | No          | 9       | 9-B  | 1000   | exp   | 0   | last   | wholeT_0.5  | OT, OT-A                    |
| 592 | No          | 9       | 9-B  | 1000   | exp   | 0   | unif   | singleC     | OT, OT-A                    |
| 593 | No          | 9       | 9-B  | 1000   | exp   | 0   | unif   | wholeT_0.01 | DiP, DiP-A, OT, OT-A        |
| 594 | No          | 9       | 9-B  | 1000   | exp   | 0   | unif   | wholeT_0.5  | OT, OT-A                    |
| 595 | No          | 9       | 9-B  | 1000   | exp   | Inf | last   | singleC     | DiP, DiP-A, OT, OT-A        |
| 596 | No          | 9       | 9-B  | 1000   | exp   | Inf | last   | wholeT_0.01 | CBN-A, DiP, DiP-A, OT, OT-A |
| 597 | No          | 9       | 9-B  | 1000   | exp   | Inf | last   | wholeT_0.5  | DiP, DiP-A, OT, OT-A        |

Table 2: (continued)

|     | Conjunction | Drivers | Tree | S.Size | Model | sh  | S.Time | S.Type      | Best method(s)       |
|-----|-------------|---------|------|--------|-------|-----|--------|-------------|----------------------|
| 598 | No          | 9       | 9-B  | 1000   | exp   | Inf | unif   | singleC     | OT, OT-A             |
| 599 | No          | 9       | 9-B  | 1000   | exp   | Inf | unif   | wholeT_0.01 | OT, OT-A             |
| 600 | No          | 9       | 9-B  | 1000   | exp   | Inf | unif   | wholeT_0.5  | OT, OT-A             |
| 601 | No          | 9       | 9-B  | 1000   | McF_4 | 0   | last   | singleC     | DiP-A, OT, OT-A      |
| 602 | No          | 9       | 9-B  | 1000   | McF_4 | 0   | last   | wholeT_0.01 | DiP, DiP-A, OT, OT-A |
| 603 | No          | 9       | 9-B  | 1000   | McF_4 | 0   | last   | wholeT_0.5  | OT, OT-A             |
| 604 | No          | 9       | 9-B  | 1000   | McF_4 | 0   | unif   | singleC     | DiP, DiP-A, OT, OT-A |
| 605 | No          | 9       | 9-B  | 1000   | McF_4 | 0   | unif   | wholeT_0.01 | DiP, DiP-A, OT, OT-A |
| 606 | No          | 9       | 9-B  | 1000   | McF_4 | 0   | unif   | wholeT_0.5  | DiP, DiP-A, OT, OT-A |
| 607 | No          | 9       | 9-B  | 1000   | McF_4 | Inf | last   | singleC     | OT, OT-A             |
| 608 | No          | 9       | 9-B  | 1000   | McF_4 | Inf | last   | wholeT_0.01 | DiP, DiP-A, OT, OT-A |
| 609 | No          | 9       | 9-B  | 1000   | McF_4 | Inf | last   | wholeT_0.5  | DiP, DiP-A, OT, OT-A |
| 610 | No          | 9       | 9-B  | 1000   | McF_4 | Inf | unif   | singleC     | DiP, DiP-A, OT, OT-A |
| 611 | No          | 9       | 9-B  | 1000   | McF_4 | Inf | unif   | wholeT_0.01 | DiP-A, OT, OT-A      |
| 612 | No          | 9       | 9-B  | 1000   | McF_4 | Inf | unif   | wholeT_0.5  | DiP, DiP-A, OT, OT-A |
| 613 | No          | 9       | 9-B  | 1000   | McF_6 | 0   | last   | singleC     | DiP, OT              |
| 614 | No          | 9       | 9-B  | 1000   | McF_6 | 0   | last   | wholeT_0.01 | DiP, OT              |
| 615 | No          | 9       | 9-B  | 1000   | McF_6 | 0   | last   | wholeT_0.5  | DiP, OT              |
| 616 | No          | 9       | 9-B  | 1000   | McF_6 | 0   | unif   | singleC     | DiP, DiP-A, OT, OT-A |
| 617 | No          | 9       | 9-B  | 1000   | McF_6 | 0   | unif   | wholeT_0.01 | DiP, DiP-A, OT, OT-A |
| 618 | No          | 9       | 9-B  | 1000   | McF_6 | 0   | unif   | wholeT_0.5  | DiP, DiP-A, OT, OT-A |
| 619 | No          | 9       | 9-B  | 1000   | McF_6 | Inf | last   | singleC     | DiP, OT              |
| 620 | No          | 9       | 9-B  | 1000   | McF_6 | Inf | last   | wholeT_0.01 | DiP, OT              |
| 621 | No          | 9       | 9-B  | 1000   | McF_6 | Inf | last   | wholeT_0.5  | DiP, OT              |
| 622 | No          | 9       | 9-B  | 1000   | McF_6 | Inf | unif   | singleC     | DiP, DiP-A, OT, OT-A |
| 623 | No          | 9       | 9-B  | 1000   | McF_6 | Inf | unif   | wholeT_0.01 | DiP, DiP-A, OT, OT-A |
| 624 | No          | 9       | 9-B  | 1000   | McF_6 | Inf | unif   | wholeT_0.5  | DiP, DiP-A, OT, OT-A |
| 625 | No          | 9       | 9-B  | 200    | Bozic | 0   | last   | singleC     | OT, OT-A             |
| 626 | No          | 9       | 9-B  | 200    | Bozic | 0   | last   | wholeT_0.01 | OT, OT-A             |
| 627 | No          | 9       | 9-B  | 200    | Bozic | 0   | last   | wholeT_0.5  | OT, OT-A             |
| 628 | No          | 9       | 9-B  | 200    | Bozic | 0   | unif   | singleC     | OT, OT-A             |
| 629 | No          | 9       | 9-B  | 200    | Bozic | 0   | unif   | wholeT_0.01 | DiP, DiP-A, OT, OT-A |
| 630 | No          | 9       | 9-B  | 200    | Bozic | 0   | unif   | wholeT_0.5  | CBN, CBN-A           |
| 631 | No          | 9       | 9-B  | 200    | Bozic | Inf | last   | singleC     | OT, OT-A             |
| 632 | No          | 9       | 9-B  | 200    | Bozic | Inf | last   | wholeT_0.01 | OT, OT-A             |
| 633 | No          | 9       | 9-B  | 200    | Bozic | Inf | last   | wholeT_0.5  | OT, OT-A             |
| 634 | No          | 9       | 9-B  | 200    | Bozic | Inf | unif   | singleC     | OT, OT-A             |
| 635 | No          | 9       | 9-B  | 200    | Bozic | Inf | unif   | wholeT_0.01 | OT, OT-A             |
| 636 | No          | 9       | 9-B  | 200    | Bozic | Inf | unif   | wholeT_0.5  | OT, OT-A             |
| 637 | No          | 9       | 9-B  | 200    | exp   | 0   | last   | singleC     | OT, OT-A             |

Table 2: (continued)

|     | Conjunction | Drivers | Tree | S.Size | Model | sh  | S.Time | S.Type      | Best method(s)       |
|-----|-------------|---------|------|--------|-------|-----|--------|-------------|----------------------|
| 638 | No          | 9       | 9-B  | 200    | exp   | 0   | last   | wholeT_0.01 | OT, OT-A             |
| 639 | No          | 9       | 9-B  | 200    | exp   | 0   | last   | wholeT_0.5  | OT, OT-A             |
| 640 | No          | 9       | 9-B  | 200    | exp   | 0   | unif   | singleC     | CBN, CBN-A           |
| 641 | No          | 9       | 9-B  | 200    | exp   | 0   | unif   | wholeT_0.01 | OT, OT-A             |
| 642 | No          | 9       | 9-B  | 200    | exp   | 0   | unif   | wholeT_0.5  | CBN, CBN-A           |
| 643 | No          | 9       | 9-B  | 200    | exp   | Inf | last   | singleC     | OT, OT-A             |
| 644 | No          | 9       | 9-B  | 200    | exp   | Inf | last   | wholeT_0.01 | OT, OT-A             |
| 645 | No          | 9       | 9-B  | 200    | exp   | Inf | last   | wholeT_0.5  | OT, OT-A             |
| 646 | No          | 9       | 9-B  | 200    | exp   | Inf | unif   | singleC     | OT, OT-A             |
| 647 | No          | 9       | 9-B  | 200    | exp   | Inf | unif   | wholeT_0.01 | OT, OT-A             |
| 648 | No          | 9       | 9-B  | 200    | exp   | Inf | unif   | wholeT_0.5  | OT, OT-A             |
| 649 | No          | 9       | 9-B  | 200    | McF_4 | 0   | last   | singleC     | OT, OT-A             |
| 650 | No          | 9       | 9-B  | 200    | McF_4 | 0   | last   | wholeT_0.01 | DiP, DiP-A, OT, OT-A |
| 651 | No          | 9       | 9-B  | 200    | McF_4 | 0   | last   | wholeT_0.5  | DiP-A, OT, OT-A      |
| 652 | No          | 9       | 9-B  | 200    | McF_4 | 0   | unif   | singleC     | OT, OT-A             |
| 653 | No          | 9       | 9-B  | 200    | McF_4 | 0   | unif   | wholeT_0.01 | DiP, DiP-A, OT, OT-A |
| 654 | No          | 9       | 9-B  | 200    | McF_4 | 0   | unif   | wholeT_0.5  | OT, OT-A             |
| 655 | No          | 9       | 9-B  | 200    | McF_4 | Inf | last   | singleC     | OT, OT-A             |
| 656 | No          | 9       | 9-B  | 200    | McF_4 | Inf | last   | wholeT_0.01 | OT, OT-A             |
| 657 | No          | 9       | 9-B  | 200    | McF_4 | Inf | last   | wholeT_0.5  | DiP-A, OT, OT-A      |
| 658 | No          | 9       | 9-B  | 200    | McF_4 | Inf | unif   | singleC     | OT, OT-A             |
| 659 | No          | 9       | 9-B  | 200    | McF_4 | Inf | unif   | wholeT_0.01 | OT, OT-A             |
| 660 | No          | 9       | 9-B  | 200    | McF_4 | Inf | unif   | wholeT_0.5  | OT, OT-A             |
| 661 | No          | 9       | 9-B  | 200    | McF_6 | 0   | last   | singleC     | DiP, OT              |
| 662 | No          | 9       | 9-B  | 200    | McF_6 | 0   | last   | wholeT_0.01 | DiP, OT              |
| 663 | No          | 9       | 9-B  | 200    | McF_6 | 0   | last   | wholeT_0.5  | DiP, OT              |
| 664 | No          | 9       | 9-B  | 200    | McF_6 | 0   | unif   | singleC     | DiP, OT, OT-A        |
| 665 | No          | 9       | 9-B  | 200    | McF_6 | 0   | unif   | wholeT_0.01 | DiP, DiP-A, OT, OT-A |
| 666 | No          | 9       | 9-B  | 200    | McF_6 | 0   | unif   | wholeT_0.5  | DiP, OT, OT-A        |
| 667 | No          | 9       | 9-B  | 200    | McF_6 | Inf | last   | singleC     | DiP, OT              |
| 668 | No          | 9       | 9-B  | 200    | McF_6 | Inf | last   | wholeT_0.01 | DiP, OT              |
| 669 | No          | 9       | 9-B  | 200    | McF_6 | Inf | last   | wholeT_0.5  | DiP, OT              |
| 670 | No          | 9       | 9-B  | 200    | McF_6 | Inf | unif   | singleC     | OT, OT-A             |
| 671 | No          | 9       | 9-B  | 200    | McF_6 | Inf | unif   | wholeT_0.01 | OT, OT-A             |
| 672 | No          | 9       | 9-B  | 200    | McF_6 | Inf | unif   | wholeT_0.5  | OT, OT-A             |
| 673 | No          | 9       | 9-B  | 100    | Bozic | 0   | last   | singleC     | OT, OT-A             |
| 674 | No          | 9       | 9-B  | 100    | Bozic | 0   | last   | wholeT_0.01 | OT, OT-A             |
| 675 | No          | 9       | 9-B  | 100    | Bozic | 0   | last   | wholeT_0.5  | OT, OT-A             |
| 676 | No          | 9       | 9-B  | 100    | Bozic | 0   | unif   | singleC     | CBN, CBN-A           |
| 677 | No          | 9       | 9-B  | 100    | Bozic | 0   | unif   | wholeT_0.01 | OT, OT-A             |

Table 2: (continued)

|     | Conjunction | Drivers | Tree | S.Size | Model | sh  | S.Time | S.Type      | Best method(s)       |
|-----|-------------|---------|------|--------|-------|-----|--------|-------------|----------------------|
| 678 | No          | 9       | 9-B  | 100    | Bozic | 0   | unif   | wholeT_0.5  | CBN, CBN-A           |
| 679 | No          | 9       | 9-B  | 100    | Bozic | Inf | last   | singleC     | OT, OT-A             |
| 680 | No          | 9       | 9-B  | 100    | Bozic | Inf | last   | wholeT_0.01 | OT, OT-A             |
| 681 | No          | 9       | 9-B  | 100    | Bozic | Inf | last   | wholeT_0.5  | OT, OT-A             |
| 682 | No          | 9       | 9-B  | 100    | Bozic | Inf | unif   | singleC     | OT, OT-A             |
| 683 | No          | 9       | 9-B  | 100    | Bozic | Inf | unif   | wholeT_0.01 | OT, OT-A             |
| 684 | No          | 9       | 9-B  | 100    | Bozic | Inf | unif   | wholeT_0.5  | OT, OT-A             |
| 685 | No          | 9       | 9-B  | 100    | exp   | 0   | last   | singleC     | OT, OT-A             |
| 686 | No          | 9       | 9-B  | 100    | exp   | 0   | last   | wholeT_0.01 | OT, OT-A             |
| 687 | No          | 9       | 9-B  | 100    | exp   | 0   | last   | wholeT_0.5  | OT, OT-A             |
| 688 | No          | 9       | 9-B  | 100    | exp   | 0   | unif   | singleC     | CBN, CBN-A           |
| 689 | No          | 9       | 9-B  | 100    | exp   | 0   | unif   | wholeT_0.01 | OT, OT-A             |
| 690 | No          | 9       | 9-B  | 100    | exp   | 0   | unif   | wholeT_0.5  | CBN, CBN-A           |
| 691 | No          | 9       | 9-B  | 100    | exp   | Inf | last   | singleC     | OT, OT-A             |
| 692 | No          | 9       | 9-B  | 100    | exp   | Inf | last   | wholeT_0.01 | OT, OT-A             |
| 693 | No          | 9       | 9-B  | 100    | exp   | Inf | last   | wholeT_0.5  | OT, OT-A             |
| 694 | No          | 9       | 9-B  | 100    | exp   | Inf | unif   | singleC     | OT, OT-A             |
| 695 | No          | 9       | 9-B  | 100    | exp   | Inf | unif   | wholeT_0.01 | OT, OT-A             |
| 696 | No          | 9       | 9-B  | 100    | exp   | Inf | unif   | wholeT_0.5  | OT, OT-A             |
| 697 | No          | 9       | 9-B  | 100    | McF_4 | 0   | last   | singleC     | OT, OT-A             |
| 698 | No          | 9       | 9-B  | 100    | McF_4 | 0   | last   | wholeT_0.01 | DiP, DiP-A, OT, OT-A |
| 699 | No          | 9       | 9-B  | 100    | McF_4 | 0   | last   | wholeT_0.5  | OT, OT-A             |
| 700 | No          | 9       | 9-B  | 100    | McF_4 | 0   | unif   | singleC     | OT, OT-A             |
| 701 | No          | 9       | 9-B  | 100    | McF_4 | 0   | unif   | wholeT_0.01 | DiP, DiP-A, OT, OT-A |
| 702 | No          | 9       | 9-B  | 100    | McF_4 | 0   | unif   | wholeT_0.5  | OT, OT-A             |
| 703 | No          | 9       | 9-B  | 100    | McF_4 | Inf | last   | singleC     | OT, OT-A             |
| 704 | No          | 9       | 9-B  | 100    | McF_4 | Inf | last   | wholeT_0.01 | OT, OT-A             |
| 705 | No          | 9       | 9-B  | 100    | McF_4 | Inf | last   | wholeT_0.5  | OT, OT-A             |
| 706 | No          | 9       | 9-B  | 100    | McF_4 | Inf | unif   | singleC     | OT, OT-A             |
| 707 | No          | 9       | 9-B  | 100    | McF_4 | Inf | unif   | wholeT_0.01 | OT, OT-A             |
| 708 | No          | 9       | 9-B  | 100    | McF_4 | Inf | unif   | wholeT_0.5  | OT, OT-A             |
| 709 | No          | 9       | 9-B  | 100    | McF_6 | 0   | last   | singleC     | OT                   |
| 710 | No          | 9       | 9-B  | 100    | McF_6 | 0   | last   | wholeT_0.01 | OT                   |
| 711 | No          | 9       | 9-B  | 100    | McF_6 | 0   | last   | wholeT_0.5  | OT                   |
| 712 | No          | 9       | 9-B  | 100    | McF_6 | 0   | unif   | singleC     | OT, OT-A             |
| 713 | No          | 9       | 9-B  | 100    | McF_6 | 0   | unif   | wholeT_0.01 | DiP, DiP-A, OT, OT-A |
| 714 | No          | 9       | 9-B  | 100    | McF_6 | 0   | unif   | wholeT_0.5  | OT, OT-A             |
| 715 | No          | 9       | 9-B  | 100    | McF_6 | Inf | last   | singleC     | OT                   |
| 716 | No          | 9       | 9-B  | 100    | McF_6 | Inf | last   | wholeT_0.01 | OT                   |
| 717 | No          | 9       | 9-B  | 100    | McF_6 | Inf | last   | wholeT_0.5  | OT                   |

Table 2: (continued)

|     | Conjunction | Drivers | Tree | S.Size | Model | sh  | S.Time | S.Type      | Best method(s)                   |
|-----|-------------|---------|------|--------|-------|-----|--------|-------------|----------------------------------|
| 718 | No          | 9       | 9-B  | 100    | McF_6 | Inf | unif   | singleC     | OT, OT-A                         |
| 719 | No          | 9       | 9-B  | 100    | McF_6 | Inf | unif   | wholeT_0.01 | OT, OT-A                         |
| 720 | No          | 9       | 9-B  | 100    | McF_6 | Inf | unif   | wholeT_0.5  | OT, OT-A                         |
| 721 | No          | 7       | 7-B  | 1000   | Bozic | 0   | last   | singleC     | DiP-A, OT, OT-A                  |
| 722 | No          | 7       | 7-B  | 1000   | Bozic | 0   | last   | wholeT_0.01 | DiP-A, OT, OT-A                  |
| 723 | No          | 7       | 7-B  | 1000   | Bozic | 0   | last   | wholeT_0.5  | OT, OT-A                         |
| 724 | No          | 7       | 7-B  | 1000   | Bozic | 0   | unif   | singleC     | DiP, DiP-A, OT, OT-A             |
| 725 | No          | 7       | 7-B  | 1000   | Bozic | 0   | unif   | wholeT_0.01 | CBN-A, DiP, DiP-A, OT, OT-A      |
| 726 | No          | 7       | 7-B  | 1000   | Bozic | 0   | unif   | wholeT_0.5  | OT, OT-A                         |
| 727 | No          | 7       | 7-B  | 1000   | Bozic | Inf | last   | singleC     | DiP, DiP-A, OT, OT-A             |
| 728 | No          | 7       | 7-B  | 1000   | Bozic | Inf | last   | wholeT_0.01 | CBN, CBN-A, DiP, DiP-A, OT, OT-A |
| 729 | No          | 7       | 7-B  | 1000   | Bozic | Inf | last   | wholeT_0.5  | DiP-A, OT, OT-A                  |
| 730 | No          | 7       | 7-B  | 1000   | Bozic | Inf | unif   | singleC     | CBN, CBN-A                       |
| 731 | No          | 7       | 7-B  | 1000   | Bozic | Inf | unif   | wholeT_0.01 | CBN, CBN-A, OT, OT-A             |
| 732 | No          | 7       | 7-B  | 1000   | Bozic | Inf | unif   | wholeT_0.5  | CBN, CBN-A                       |
| 733 | No          | 7       | 7-B  | 1000   | exp   | 0   | last   | singleC     | OT-A                             |
| 734 | No          | 7       | 7-B  | 1000   | exp   | 0   | last   | wholeT_0.01 | OT-A                             |
| 735 | No          | 7       | 7-B  | 1000   | exp   | 0   | last   | wholeT_0.5  | OT-A                             |
| 736 | No          | 7       | 7-B  | 1000   | exp   | 0   | unif   | singleC     | OT, OT-A                         |
| 737 | No          | 7       | 7-B  | 1000   | exp   | 0   | unif   | wholeT_0.01 | CBN, CBN-A, OT, OT-A             |
| 738 | No          | 7       | 7-B  | 1000   | exp   | 0   | unif   | wholeT_0.5  | OT, OT-A                         |
| 739 | No          | 7       | 7-B  | 1000   | exp   | Inf | last   | singleC     | OT, OT-A                         |
| 740 | No          | 7       | 7-B  | 1000   | exp   | Inf | last   | wholeT_0.01 | CBN, CBN-A, OT, OT-A             |
| 741 | No          | 7       | 7-B  | 1000   | exp   | Inf | last   | wholeT_0.5  | OT, OT-A                         |
| 742 | No          | 7       | 7-B  | 1000   | exp   | Inf | unif   | singleC     | OT, OT-A                         |
| 743 | No          | 7       | 7-B  | 1000   | exp   | Inf | unif   | wholeT_0.01 | CBN-A, OT, OT-A                  |
| 744 | No          | 7       | 7-B  | 1000   | exp   | Inf | unif   | wholeT_0.5  | OT, OT-A                         |
| 745 | No          | 7       | 7-B  | 1000   | McF_4 | 0   | last   | singleC     | DiP, DiP-A, OT, OT-A             |
| 746 | No          | 7       | 7-B  | 1000   | McF_4 | 0   | last   | wholeT_0.01 | DiP, DiP-A, OT, OT-A             |
| 747 | No          | 7       | 7-B  | 1000   | McF_4 | 0   | last   | wholeT_0.5  | DiP, DiP-A, OT, OT-A             |
| 748 | No          | 7       | 7-B  | 1000   | McF_4 | 0   | unif   | singleC     | DiP, DiP-A, OT, OT-A             |
| 749 | No          | 7       | 7-B  | 1000   | McF_4 | 0   | unif   | wholeT_0.01 | DiP, DiP-A, OT, OT-A             |
| 750 | No          | 7       | 7-B  | 1000   | McF_4 | 0   | unif   | wholeT_0.5  | DiP, DiP-A, OT, OT-A             |
| 751 | No          | 7       | 7-B  | 1000   | McF_4 | Inf | last   | singleC     | DiP, DiP-A, OT, OT-A             |
| 752 | No          | 7       | 7-B  | 1000   | McF_4 | Inf | last   | wholeT_0.01 | DiP, DiP-A, OT, OT-A             |
| 753 | No          | 7       | 7-B  | 1000   | McF_4 | Inf | last   | wholeT_0.5  | DiP, DiP-A, OT, OT-A             |
| 754 | No          | 7       | 7-B  | 1000   | McF_4 | Inf | unif   | singleC     | DiP, DiP-A, OT, OT-A             |
| 755 | No          | 7       | 7-B  | 1000   | McF_4 | Inf | unif   | wholeT_0.01 | DiP, DiP-A, OT, OT-A             |
| 756 | No          | 7       | 7-B  | 1000   | McF_4 | Inf | unif   | wholeT_0.5  | DiP, DiP-A, OT, OT-A             |
| 757 | No          | 7       | 7-B  | 1000   | McF_6 | 0   | last   | singleC     | DiP, DiP-A, OT, OT-A             |

Table 2: (continued)

|     | Conjunction | Drivers | Tree | S.Size | Model | sh  | S.Time | S.Type      | Best method(s)                   |
|-----|-------------|---------|------|--------|-------|-----|--------|-------------|----------------------------------|
| 758 | No          | 7       | 7-B  | 1000   | McF_6 | 0   | last   | wholeT_0.01 | DiP, DiP-A, OT, OT-A             |
| 759 | No          | 7       | 7-B  | 1000   | McF_6 | 0   | last   | wholeT_0.5  | DiP, DiP-A, OT, OT-A             |
| 760 | No          | 7       | 7-B  | 1000   | McF_6 | 0   | unif   | singleC     | CBN, CBN-A, DiP, DiP-A, OT, OT-A |
| 761 | No          | 7       | 7-B  | 1000   | McF_6 | 0   | unif   | wholeT_0.01 | CBN, CBN-A, DiP, DiP-A, OT, OT-A |
| 762 | No          | 7       | 7-B  | 1000   | McF_6 | 0   | unif   | wholeT_0.5  | CBN, CBN-A, DiP, DiP-A, OT, OT-A |
| 763 | No          | 7       | 7-B  | 1000   | McF_6 | Inf | last   | singleC     | DiP, DiP-A, OT, OT-A             |
| 764 | No          | 7       | 7-B  | 1000   | McF_6 | Inf | last   | wholeT_0.01 | DiP-A, OT, OT-A                  |
| 765 | No          | 7       | 7-B  | 1000   | McF_6 | Inf | last   | wholeT_0.5  | DiP, DiP-A, OT, OT-A             |
| 766 | No          | 7       | 7-B  | 1000   | McF_6 | Inf | unif   | singleC     | CBN, CBN-A, DiP, DiP-A, OT, OT-A |
| 767 | No          | 7       | 7-B  | 1000   | McF_6 | Inf | unif   | wholeT_0.01 | CBN, CBN-A, DiP, DiP-A, OT, OT-A |
| 768 | No          | 7       | 7-B  | 1000   | McF_6 | Inf | unif   | wholeT_0.5  | CBN, CBN-A, DiP, DiP-A, OT, OT-A |
| 769 | No          | 7       | 7-B  | 200    | Bozic | 0   | last   | singleC     | OT-A                             |
| 770 | No          | 7       | 7-B  | 200    | Bozic | 0   | last   | wholeT_0.01 | OT-A                             |
| 771 | No          | 7       | 7-B  | 200    | Bozic | 0   | last   | wholeT_0.5  | OT-A                             |
| 772 | No          | 7       | 7-B  | 200    | Bozic | 0   | unif   | singleC     | OT, OT-A                         |
| 773 | No          | 7       | 7-B  | 200    | Bozic | 0   | unif   | wholeT_0.01 | CBN, CBN-A, OT, OT-A             |
| 774 | No          | 7       | 7-B  | 200    | Bozic | 0   | unif   | wholeT_0.5  | OT, OT-A                         |
| 775 | No          | 7       | 7-B  | 200    | Bozic | Inf | last   | singleC     | OT, OT-A                         |
| 776 | No          | 7       | 7-B  | 200    | Bozic | Inf | last   | wholeT_0.01 | CBN, CBN-A, OT, OT-A             |
| 777 | No          | 7       | 7-B  | 200    | Bozic | Inf | last   | wholeT_0.5  | OT, OT-A                         |
| 778 | No          | 7       | 7-B  | 200    | Bozic | Inf | unif   | singleC     | CBN, CBN-A, OT, OT-A             |
| 779 | No          | 7       | 7-B  | 200    | Bozic | Inf | unif   | wholeT_0.01 | CBN, CBN-A, OT, OT-A             |
| 780 | No          | 7       | 7-B  | 200    | Bozic | Inf | unif   | wholeT_0.5  | CBN, CBN-A, OT, OT-A             |
| 781 | No          | 7       | 7-B  | 200    | exp   | 0   | last   | singleC     | OT-A                             |
| 782 | No          | 7       | 7-B  | 200    | exp   | 0   | last   | wholeT_0.01 | OT-A                             |
| 783 | No          | 7       | 7-B  | 200    | exp   | 0   | last   | wholeT_0.5  | OT-A                             |
| 784 | No          | 7       | 7-B  | 200    | exp   | 0   | unif   | singleC     | OT, OT-A                         |
| 785 | No          | 7       | 7-B  | 200    | exp   | 0   | unif   | wholeT_0.01 | OT, OT-A                         |
| 786 | No          | 7       | 7-B  | 200    | exp   | 0   | unif   | wholeT_0.5  | OT, OT-A                         |
| 787 | No          | 7       | 7-B  | 200    | exp   | Inf | last   | singleC     | OT, OT-A                         |
| 788 | No          | 7       | 7-B  | 200    | exp   | Inf | last   | wholeT_0.01 | CBN-A, OT-A                      |
| 789 | No          | 7       | 7-B  | 200    | exp   | Inf | last   | wholeT_0.5  | OT, OT-A                         |
| 790 | No          | 7       | 7-B  | 200    | exp   | Inf | unif   | singleC     | OT, OT-A                         |
| 791 | No          | 7       | 7-B  | 200    | exp   | Inf | unif   | wholeT_0.01 | CBN, CBN-A, OT, OT-A             |
| 792 | No          | 7       | 7-B  | 200    | exp   | Inf | unif   | wholeT_0.5  | OT, OT-A                         |
| 793 | No          | 7       | 7-B  | 200    | McF_4 | 0   | last   | singleC     | OT, OT-A                         |
| 794 | No          | 7       | 7-B  | 200    | McF_4 | 0   | last   | wholeT_0.01 | DiP, DiP-A, OT, OT-A             |
| 795 | No          | 7       | 7-B  | 200    | McF_4 | 0   | last   | wholeT_0.5  | OT, OT-A                         |
| 796 | No          | 7       | 7-B  | 200    | McF_4 | 0   | unif   | singleC     | DiP-A, OT, OT-A                  |
| 797 | No          | 7       | 7-B  | 200    | McF_4 | 0   | unif   | wholeT_0.01 | DiP, DiP-A, OT, OT-A             |

Table 2: (continued)

|     | Conjunction | Drivers | Tree | S.Size | Model | sh  | S.Time | S.Type      | Best method(s)                   |
|-----|-------------|---------|------|--------|-------|-----|--------|-------------|----------------------------------|
| 798 | No          | 7       | 7-B  | 200    | McF_4 | 0   | unif   | wholeT_0.5  | OT, OT-A                         |
| 799 | No          | 7       | 7-B  | 200    | McF_4 | Inf | last   | singleC     | OT, OT-A                         |
| 800 | No          | 7       | 7-B  | 200    | McF_4 | Inf | last   | wholeT_0.01 | OT, OT-A                         |
| 801 | No          | 7       | 7-B  | 200    | McF_4 | Inf | last   | wholeT_0.5  | OT, OT-A                         |
| 802 | No          | 7       | 7-B  | 200    | McF_4 | Inf | unif   | singleC     | OT, OT-A                         |
| 803 | No          | 7       | 7-B  | 200    | McF_4 | Inf | unif   | wholeT_0.01 | OT, OT-A                         |
| 804 | No          | 7       | 7-B  | 200    | McF_4 | Inf | unif   | wholeT_0.5  | OT, OT-A                         |
| 805 | No          | 7       | 7-B  | 200    | McF_6 | 0   | last   | singleC     | DiP-A, OT, OT-A                  |
| 806 | No          | 7       | 7-B  | 200    | McF_6 | 0   | last   | wholeT_0.01 | DiP, DiP-A, OT, OT-A             |
| 807 | No          | 7       | 7-B  | 200    | McF_6 | 0   | last   | wholeT_0.5  | DiP-A, OT, OT-A                  |
| 808 | No          | 7       | 7-B  | 200    | McF_6 | 0   | unif   | singleC     | CBN, CBN-A, DiP, DiP-A, OT, OT-A |
| 809 | No          | 7       | 7-B  | 200    | McF_6 | 0   | unif   | wholeT_0.01 | CBN, CBN-A, DiP, DiP-A, OT, OT-A |
| 810 | No          | 7       | 7-B  | 200    | McF_6 | 0   | unif   | wholeT_0.5  | CBN, CBN-A, DiP, OT, OT-A        |
| 811 | No          | 7       | 7-B  | 200    | McF_6 | Inf | last   | singleC     | DiP-A, OT, OT-A                  |
| 812 | No          | 7       | 7-B  | 200    | McF_6 | Inf | last   | wholeT_0.01 | OT, OT-A                         |
| 813 | No          | 7       | 7-B  | 200    | McF_6 | Inf | last   | wholeT_0.5  | DiP-A, OT, OT-A                  |
| 814 | No          | 7       | 7-B  | 200    | McF_6 | Inf | unif   | singleC     | CBN, CBN-A                       |
| 815 | No          | 7       | 7-B  | 200    | McF_6 | Inf | unif   | wholeT_0.01 | CBN, CBN-A, DiP-A                |
| 816 | No          | 7       | 7-B  | 200    | McF_6 | Inf | unif   | wholeT_0.5  | CBN, CBN-A, DiP                  |
| 817 | No          | 7       | 7-B  | 100    | Bozic | 0   | last   | singleC     | OT-A                             |
| 818 | No          | 7       | 7-B  | 100    | Bozic | 0   | last   | wholeT_0.01 | OT-A                             |
| 819 | No          | 7       | 7-B  | 100    | Bozic | 0   | last   | wholeT_0.5  | OT-A                             |
| 820 | No          | 7       | 7-B  | 100    | Bozic | 0   | unif   | singleC     | OT, OT-A                         |
| 821 | No          | 7       | 7-B  | 100    | Bozic | 0   | unif   | wholeT_0.01 | CBN-A, OT, OT-A                  |
| 822 | No          | 7       | 7-B  | 100    | Bozic | 0   | unif   | wholeT_0.5  | OT, OT-A                         |
| 823 | No          | 7       | 7-B  | 100    | Bozic | Inf | last   | singleC     | OT, OT-A                         |
| 824 | No          | 7       | 7-B  | 100    | Bozic | Inf | last   | wholeT_0.01 | CBN-A, OT-A                      |
| 825 | No          | 7       | 7-B  | 100    | Bozic | Inf | last   | wholeT_0.5  | OT, OT-A                         |
| 826 | No          | 7       | 7-B  | 100    | Bozic | Inf | unif   | singleC     | OT, OT-A                         |
| 827 | No          | 7       | 7-B  | 100    | Bozic | Inf | unif   | wholeT_0.01 | CBN-A, OT, OT-A                  |
| 828 | No          | 7       | 7-B  | 100    | Bozic | Inf | unif   | wholeT_0.5  | CBN-A, OT, OT-A                  |
| 829 | No          | 7       | 7-B  | 100    | exp   | 0   | last   | singleC     | OT-A                             |
| 830 | No          | 7       | 7-B  | 100    | exp   | 0   | last   | wholeT_0.01 | OT-A                             |
| 831 | No          | 7       | 7-B  | 100    | exp   | 0   | last   | wholeT_0.5  | OT-A                             |
| 832 | No          | 7       | 7-B  | 100    | exp   | 0   | unif   | singleC     | OT, OT-A                         |
| 833 | No          | 7       | 7-B  | 100    | exp   | 0   | unif   | wholeT_0.01 | OT, OT-A                         |
| 834 | No          | 7       | 7-B  | 100    | exp   | 0   | unif   | wholeT_0.5  | CBN, CBN-A                       |
| 835 | No          | 7       | 7-B  | 100    | exp   | Inf | last   | singleC     | OT, OT-A                         |
| 836 | No          | 7       | 7-B  | 100    | exp   | Inf | last   | wholeT_0.01 | OT-A                             |
| 837 | No          | 7       | 7-B  | 100    | exp   | Inf | last   | wholeT_0.5  | OT-A                             |

Table 2: (continued)

|     | Conjunction | Drivers | Tree | S.Size | Model | sh  | S.Time | S.Type      | Best method(s)         |
|-----|-------------|---------|------|--------|-------|-----|--------|-------------|------------------------|
| 838 | No          | 7       | 7-B  | 100    | exp   | Inf | unif   | singleC     | OT, OT-A               |
| 839 | No          | 7       | 7-B  | 100    | exp   | Inf | unif   | wholeT_0.01 | CBN, CBN-A, OT, OT-A   |
| 840 | No          | 7       | 7-B  | 100    | exp   | Inf | unif   | wholeT_0.5  | OT, OT-A               |
| 841 | No          | 7       | 7-B  | 100    | McF_4 | 0   | last   | singleC     | OT, OT-A               |
| 842 | No          | 7       | 7-B  | 100    | McF_4 | 0   | last   | wholeT_0.01 | DiP-A, OT, OT-A        |
| 843 | No          | 7       | 7-B  | 100    | McF_4 | 0   | last   | wholeT_0.5  | OT, OT-A               |
| 844 | No          | 7       | 7-B  | 100    | McF_4 | 0   | unif   | singleC     | OT, OT-A               |
| 845 | No          | 7       | 7-B  | 100    | McF_4 | 0   | unif   | wholeT_0.01 | OT, OT-A               |
| 846 | No          | 7       | 7-B  | 100    | McF_4 | 0   | unif   | wholeT_0.5  | OT, OT-A               |
| 847 | No          | 7       | 7-B  | 100    | McF_4 | Inf | last   | singleC     | OT, OT-A               |
| 848 | No          | 7       | 7-B  | 100    | McF_4 | Inf | last   | wholeT_0.01 | OT, OT-A               |
| 849 | No          | 7       | 7-B  | 100    | McF_4 | Inf | last   | wholeT_0.5  | OT, OT-A               |
| 850 | No          | 7       | 7-B  | 100    | McF_4 | Inf | unif   | singleC     | OT, OT-A               |
| 851 | No          | 7       | 7-B  | 100    | McF_4 | Inf | unif   | wholeT_0.01 | OT, OT-A               |
| 852 | No          | 7       | 7-B  | 100    | McF_4 | Inf | unif   | wholeT_0.5  | OT, OT-A               |
| 853 | No          | 7       | 7-B  | 100    | McF_6 | 0   | last   | singleC     | OT, OT-A               |
| 854 | No          | 7       | 7-B  | 100    | McF_6 | 0   | last   | wholeT_0.01 | OT, OT-A               |
| 855 | No          | 7       | 7-B  | 100    | McF_6 | 0   | last   | wholeT_0.5  | OT, OT-A               |
| 856 | No          | 7       | 7-B  | 100    | McF_6 | 0   | unif   | singleC     | CBN, CBN-A, OT, OT-A   |
| 857 | No          | 7       | 7-B  | 100    | McF_6 | 0   | unif   | wholeT_0.01 | CBN, CBN-A, DiP, DiP-A |
| 858 | No          | 7       | 7-B  | 100    | McF_6 | 0   | unif   | wholeT_0.5  | CBN, CBN-A             |
| 859 | No          | 7       | 7-B  | 100    | McF_6 | Inf | last   | singleC     | OT, OT-A               |
| 860 | No          | 7       | 7-B  | 100    | McF_6 | Inf | last   | wholeT_0.01 | OT, OT-A               |
| 861 | No          | 7       | 7-B  | 100    | McF_6 | Inf | last   | wholeT_0.5  | OT, OT-A               |
| 862 | No          | 7       | 7-B  | 100    | McF_6 | Inf | unif   | singleC     | CBN, CBN-A             |
| 863 | No          | 7       | 7-B  | 100    | McF_6 | Inf | unif   | wholeT_0.01 | CBN, CBN-A             |
| 864 | No          | 7       | 7-B  | 100    | McF_6 | Inf | unif   | wholeT_0.5  | CBN, CBN-A             |



### 2.3 Confidence sets (MCB-2), PND, Drivers Known

Table 3: Confidence sets (method MCB-2) when Drivers are Known for measure PND.

|    | Conjunction | Drivers | Tree | S.Size | Model | sh  | S.Time | S.Type      | Best method(s)       |
|----|-------------|---------|------|--------|-------|-----|--------|-------------|----------------------|
| 1  | Yes         | 11      | 11-A | 1000   | Bozic | 0   | last   | singleC     | CBN, CBN-A           |
| 2  | Yes         | 11      | 11-A | 1000   | Bozic | 0   | last   | wholeT_0.01 | CBN, CBN-A, OT, OT-A |
| 3  | Yes         | 11      | 11-A | 1000   | Bozic | 0   | last   | wholeT_0.5  | CBN, CBN-A, OT, OT-A |
| 4  | Yes         | 11      | 11-A | 1000   | Bozic | 0   | unif   | singleC     | CBN, CBN-A           |
| 5  | Yes         | 11      | 11-A | 1000   | Bozic | 0   | unif   | wholeT_0.01 | CBN, CBN-A           |
| 6  | Yes         | 11      | 11-A | 1000   | Bozic | 0   | unif   | wholeT_0.5  | CBN, CBN-A           |
| 7  | Yes         | 11      | 11-A | 1000   | Bozic | Inf | last   | singleC     | CBN, CBN-A           |
| 8  | Yes         | 11      | 11-A | 1000   | Bozic | Inf | last   | wholeT_0.01 | CBN, CBN-A           |
| 9  | Yes         | 11      | 11-A | 1000   | Bozic | Inf | last   | wholeT_0.5  | CBN, CBN-A           |
| 10 | Yes         | 11      | 11-A | 1000   | Bozic | Inf | unif   | singleC     | CBN, CBN-A           |
| 11 | Yes         | 11      | 11-A | 1000   | Bozic | Inf | unif   | wholeT_0.01 | CBN, CBN-A           |
| 12 | Yes         | 11      | 11-A | 1000   | Bozic | Inf | unif   | wholeT_0.5  | CBN, CBN-A           |
| 13 | Yes         | 11      | 11-A | 1000   | exp   | 0   | last   | singleC     | CBN, CBN-A           |
| 14 | Yes         | 11      | 11-A | 1000   | exp   | 0   | last   | wholeT_0.01 | CBN, CBN-A           |
| 15 | Yes         | 11      | 11-A | 1000   | exp   | 0   | last   | wholeT_0.5  | CBN, CBN-A           |
| 16 | Yes         | 11      | 11-A | 1000   | exp   | 0   | unif   | singleC     | CBN, CBN-A           |
| 17 | Yes         | 11      | 11-A | 1000   | exp   | 0   | unif   | wholeT_0.01 | CBN, CBN-A           |
| 18 | Yes         | 11      | 11-A | 1000   | exp   | 0   | unif   | wholeT_0.5  | CBN, CBN-A           |
| 19 | Yes         | 11      | 11-A | 1000   | exp   | Inf | last   | singleC     | CBN, CBN-A           |
| 20 | Yes         | 11      | 11-A | 1000   | exp   | Inf | last   | wholeT_0.01 | CBN, CBN-A           |
| 21 | Yes         | 11      | 11-A | 1000   | exp   | Inf | last   | wholeT_0.5  | CBN, CBN-A           |
| 22 | Yes         | 11      | 11-A | 1000   | exp   | Inf | unif   | singleC     | CBN, CBN-A           |
| 23 | Yes         | 11      | 11-A | 1000   | exp   | Inf | unif   | wholeT_0.01 | CBN                  |
| 24 | Yes         | 11      | 11-A | 1000   | exp   | Inf | unif   | wholeT_0.5  | CBN, CBN-A           |
| 25 | Yes         | 11      | 11-A | 1000   | McF_4 | 0   | last   | singleC     | CBN-A, OT, OT-A      |
| 26 | Yes         | 11      | 11-A | 1000   | McF_4 | 0   | last   | wholeT_0.01 | OT, OT-A             |
| 27 | Yes         | 11      | 11-A | 1000   | McF_4 | 0   | last   | wholeT_0.5  | CBN, CBN-A, OT, OT-A |
| 28 | Yes         | 11      | 11-A | 1000   | McF_4 | 0   | unif   | singleC     | CBN, CBN-A           |
| 29 | Yes         | 11      | 11-A | 1000   | McF_4 | 0   | unif   | wholeT_0.01 | CBN, CBN-A           |
| 30 | Yes         | 11      | 11-A | 1000   | McF_4 | 0   | unif   | wholeT_0.5  | CBN, CBN-A           |
| 31 | Yes         | 11      | 11-A | 1000   | McF_4 | Inf | last   | singleC     | CBN, CBN-A, OT, OT-A |
| 32 | Yes         | 11      | 11-A | 1000   | McF_4 | Inf | last   | wholeT_0.01 | CBN, CBN-A, OT, OT-A |
| 33 | Yes         | 11      | 11-A | 1000   | McF_4 | Inf | last   | wholeT_0.5  | CBN, CBN-A           |
| 34 | Yes         | 11      | 11-A | 1000   | McF_4 | Inf | unif   | singleC     | CBN, CBN-A           |
| 35 | Yes         | 11      | 11-A | 1000   | McF_4 | Inf | unif   | wholeT_0.01 | CBN, CBN-A           |
| 36 | Yes         | 11      | 11-A | 1000   | McF_4 | Inf | unif   | wholeT_0.5  | CBN, CBN-A           |
| 37 | Yes         | 11      | 11-A | 1000   | McF_6 | 0   | last   | singleC     | DiP, DiP-A           |

Table 3: (continued)

|    | Conjunction | Drivers | Tree | S.Size | Model | sh  | S.Time | S.Type      | Best method(s)                   |
|----|-------------|---------|------|--------|-------|-----|--------|-------------|----------------------------------|
| 38 | Yes         | 11      | 11-A | 1000   | McF_6 | 0   | last   | wholeT_0.01 | DiP, DiP-A                       |
| 39 | Yes         | 11      | 11-A | 1000   | McF_6 | 0   | last   | wholeT_0.5  | DiP, DiP-A                       |
| 40 | Yes         | 11      | 11-A | 1000   | McF_6 | 0   | unif   | singleC     | CBN, CBN-A, DiP, DiP-A, OT, OT-A |
| 41 | Yes         | 11      | 11-A | 1000   | McF_6 | 0   | unif   | wholeT_0.01 | CBN, DiP, DiP-A                  |
| 42 | Yes         | 11      | 11-A | 1000   | McF_6 | 0   | unif   | wholeT_0.5  | CBN, CBN-A, DiP, DiP-A, OT, OT-A |
| 43 | Yes         | 11      | 11-A | 1000   | McF_6 | Inf | last   | singleC     | DiP-A, OT, OT-A                  |
| 44 | Yes         | 11      | 11-A | 1000   | McF_6 | Inf | last   | wholeT_0.01 | DiP-A                            |
| 45 | Yes         | 11      | 11-A | 1000   | McF_6 | Inf | last   | wholeT_0.5  | DiP-A, OT, OT-A                  |
| 46 | Yes         | 11      | 11-A | 1000   | McF_6 | Inf | unif   | singleC     | CBN, OT, OT-A                    |
| 47 | Yes         | 11      | 11-A | 1000   | McF_6 | Inf | unif   | wholeT_0.01 | CBN, CBN-A, OT, OT-A             |
| 48 | Yes         | 11      | 11-A | 1000   | McF_6 | Inf | unif   | wholeT_0.5  | CBN, OT, OT-A                    |
| 49 | Yes         | 11      | 11-A | 200    | Bozic | 0   | last   | singleC     | CBN, CBN-A                       |
| 50 | Yes         | 11      | 11-A | 200    | Bozic | 0   | last   | wholeT_0.01 | CBN, CBN-A                       |
| 51 | Yes         | 11      | 11-A | 200    | Bozic | 0   | last   | wholeT_0.5  | CBN-A                            |
| 52 | Yes         | 11      | 11-A | 200    | Bozic | 0   | unif   | singleC     | CBN, CBN-A                       |
| 53 | Yes         | 11      | 11-A | 200    | Bozic | 0   | unif   | wholeT_0.01 | CBN, CBN-A                       |
| 54 | Yes         | 11      | 11-A | 200    | Bozic | 0   | unif   | wholeT_0.5  | CBN, CBN-A                       |
| 55 | Yes         | 11      | 11-A | 200    | Bozic | Inf | last   | singleC     | CBN, CBN-A                       |
| 56 | Yes         | 11      | 11-A | 200    | Bozic | Inf | last   | wholeT_0.01 | CBN, CBN-A                       |
| 57 | Yes         | 11      | 11-A | 200    | Bozic | Inf | last   | wholeT_0.5  | CBN, CBN-A                       |
| 58 | Yes         | 11      | 11-A | 200    | Bozic | Inf | unif   | singleC     | CBN, CBN-A                       |
| 59 | Yes         | 11      | 11-A | 200    | Bozic | Inf | unif   | wholeT_0.01 | CBN, CBN-A                       |
| 60 | Yes         | 11      | 11-A | 200    | Bozic | Inf | unif   | wholeT_0.5  | CBN, CBN-A                       |
| 61 | Yes         | 11      | 11-A | 200    | exp   | 0   | last   | singleC     | CBN, CBN-A                       |
| 62 | Yes         | 11      | 11-A | 200    | exp   | 0   | last   | wholeT_0.01 | CBN, CBN-A                       |
| 63 | Yes         | 11      | 11-A | 200    | exp   | 0   | last   | wholeT_0.5  | CBN, CBN-A                       |
| 64 | Yes         | 11      | 11-A | 200    | exp   | 0   | unif   | singleC     | CBN, CBN-A                       |
| 65 | Yes         | 11      | 11-A | 200    | exp   | 0   | unif   | wholeT_0.01 | CBN, CBN-A                       |
| 66 | Yes         | 11      | 11-A | 200    | exp   | 0   | unif   | wholeT_0.5  | CBN, CBN-A                       |
| 67 | Yes         | 11      | 11-A | 200    | exp   | Inf | last   | singleC     | CBN, CBN-A                       |
| 68 | Yes         | 11      | 11-A | 200    | exp   | Inf | last   | wholeT_0.01 | CBN-A                            |
| 69 | Yes         | 11      | 11-A | 200    | exp   | Inf | last   | wholeT_0.5  | CBN, CBN-A                       |
| 70 | Yes         | 11      | 11-A | 200    | exp   | Inf | unif   | singleC     | CBN, CBN-A                       |
| 71 | Yes         | 11      | 11-A | 200    | exp   | Inf | unif   | wholeT_0.01 | CBN, CBN-A                       |
| 72 | Yes         | 11      | 11-A | 200    | exp   | Inf | unif   | wholeT_0.5  | CBN, CBN-A                       |
| 73 | Yes         | 11      | 11-A | 200    | McF_4 | 0   | last   | singleC     | CBN, CBN-A, OT, OT-A             |
| 74 | Yes         | 11      | 11-A | 200    | McF_4 | 0   | last   | wholeT_0.01 | CBN-A, OT, OT-A                  |
| 75 | Yes         | 11      | 11-A | 200    | McF_4 | 0   | last   | wholeT_0.5  | CBN, CBN-A                       |
| 76 | Yes         | 11      | 11-A | 200    | McF_4 | 0   | unif   | singleC     | CBN, CBN-A                       |
| 77 | Yes         | 11      | 11-A | 200    | McF_4 | 0   | unif   | wholeT_0.01 | CBN, CBN-A                       |

Table 3: (continued)

|     | Conjunction | Drivers | Tree | S.Size | Model | sh  | S.Time | S.Type      | Best method(s)       |
|-----|-------------|---------|------|--------|-------|-----|--------|-------------|----------------------|
| 78  | Yes         | 11      | 11-A | 200    | McF_4 | 0   | unif   | wholeT_0.5  | CBN, CBN-A           |
| 79  | Yes         | 11      | 11-A | 200    | McF_4 | Inf | last   | singleC     | CBN, CBN-A           |
| 80  | Yes         | 11      | 11-A | 200    | McF_4 | Inf | last   | wholeT_0.01 | CBN, CBN-A, OT, OT-A |
| 81  | Yes         | 11      | 11-A | 200    | McF_4 | Inf | last   | wholeT_0.5  | CBN, CBN-A, OT, OT-A |
| 82  | Yes         | 11      | 11-A | 200    | McF_4 | Inf | unif   | singleC     | CBN, CBN-A           |
| 83  | Yes         | 11      | 11-A | 200    | McF_4 | Inf | unif   | wholeT_0.01 | CBN, CBN-A           |
| 84  | Yes         | 11      | 11-A | 200    | McF_4 | Inf | unif   | wholeT_0.5  | CBN, CBN-A           |
| 85  | Yes         | 11      | 11-A | 200    | McF_6 | 0   | last   | singleC     | OT, OT-A             |
| 86  | Yes         | 11      | 11-A | 200    | McF_6 | 0   | last   | wholeT_0.01 | OT, OT-A             |
| 87  | Yes         | 11      | 11-A | 200    | McF_6 | 0   | last   | wholeT_0.5  | OT, OT-A             |
| 88  | Yes         | 11      | 11-A | 200    | McF_6 | 0   | unif   | singleC     | CBN-A, OT, OT-A      |
| 89  | Yes         | 11      | 11-A | 200    | McF_6 | 0   | unif   | wholeT_0.01 | CBN, CBN-A, OT, OT-A |
| 90  | Yes         | 11      | 11-A | 200    | McF_6 | 0   | unif   | wholeT_0.5  | CBN, CBN-A, OT, OT-A |
| 91  | Yes         | 11      | 11-A | 200    | McF_6 | Inf | last   | singleC     | OT, OT-A             |
| 92  | Yes         | 11      | 11-A | 200    | McF_6 | Inf | last   | wholeT_0.01 | OT, OT-A             |
| 93  | Yes         | 11      | 11-A | 200    | McF_6 | Inf | last   | wholeT_0.5  | OT, OT-A             |
| 94  | Yes         | 11      | 11-A | 200    | McF_6 | Inf | unif   | singleC     | CBN, CBN-A, OT, OT-A |
| 95  | Yes         | 11      | 11-A | 200    | McF_6 | Inf | unif   | wholeT_0.01 | CBN, CBN-A, OT, OT-A |
| 96  | Yes         | 11      | 11-A | 200    | McF_6 | Inf | unif   | wholeT_0.5  | CBN, OT, OT-A        |
| 97  | Yes         | 11      | 11-A | 100    | Bozic | 0   | last   | singleC     | CBN, CBN-A           |
| 98  | Yes         | 11      | 11-A | 100    | Bozic | 0   | last   | wholeT_0.01 | CBN, CBN-A           |
| 99  | Yes         | 11      | 11-A | 100    | Bozic | 0   | last   | wholeT_0.5  | CBN, CBN-A           |
| 100 | Yes         | 11      | 11-A | 100    | Bozic | 0   | unif   | singleC     | CBN, CBN-A           |
| 101 | Yes         | 11      | 11-A | 100    | Bozic | 0   | unif   | wholeT_0.01 | CBN, CBN-A           |
| 102 | Yes         | 11      | 11-A | 100    | Bozic | 0   | unif   | wholeT_0.5  | CBN, CBN-A           |
| 103 | Yes         | 11      | 11-A | 100    | Bozic | Inf | last   | singleC     | CBN, CBN-A           |
| 104 | Yes         | 11      | 11-A | 100    | Bozic | Inf | last   | wholeT_0.01 | CBN, CBN-A           |
| 105 | Yes         | 11      | 11-A | 100    | Bozic | Inf | last   | wholeT_0.5  | CBN, CBN-A           |
| 106 | Yes         | 11      | 11-A | 100    | Bozic | Inf | unif   | singleC     | CBN, CBN-A           |
| 107 | Yes         | 11      | 11-A | 100    | Bozic | Inf | unif   | wholeT_0.01 | CBN, CBN-A           |
| 108 | Yes         | 11      | 11-A | 100    | Bozic | Inf | unif   | wholeT_0.5  | CBN, CBN-A           |
| 109 | Yes         | 11      | 11-A | 100    | exp   | 0   | last   | singleC     | CBN, CBN-A           |
| 110 | Yes         | 11      | 11-A | 100    | exp   | 0   | last   | wholeT_0.01 | CBN, CBN-A           |
| 111 | Yes         | 11      | 11-A | 100    | exp   | 0   | last   | wholeT_0.5  | CBN, CBN-A           |
| 112 | Yes         | 11      | 11-A | 100    | exp   | 0   | unif   | singleC     | CBN, CBN-A           |
| 113 | Yes         | 11      | 11-A | 100    | exp   | 0   | unif   | wholeT_0.01 | CBN, CBN-A           |
| 114 | Yes         | 11      | 11-A | 100    | exp   | 0   | unif   | wholeT_0.5  | CBN, CBN-A           |
| 115 | Yes         | 11      | 11-A | 100    | exp   | Inf | last   | singleC     | CBN, CBN-A           |
| 116 | Yes         | 11      | 11-A | 100    | exp   | Inf | last   | wholeT_0.01 | CBN, CBN-A           |
| 117 | Yes         | 11      | 11-A | 100    | exp   | Inf | last   | wholeT_0.5  | CBN, CBN-A           |

Table 3: (continued)

|     | Conjunction | Drivers | Tree | S.Size | Model | sh  | S.Time | S.Type      | Best method(s)       |
|-----|-------------|---------|------|--------|-------|-----|--------|-------------|----------------------|
| 118 | Yes         | 11      | 11-A | 100    | exp   | Inf | unif   | singleC     | CBN, CBN-A           |
| 119 | Yes         | 11      | 11-A | 100    | exp   | Inf | unif   | wholeT_0.01 | CBN, CBN-A           |
| 120 | Yes         | 11      | 11-A | 100    | exp   | Inf | unif   | wholeT_0.5  | CBN, CBN-A           |
| 121 | Yes         | 11      | 11-A | 100    | McF_4 | 0   | last   | singleC     | CBN, CBN-A           |
| 122 | Yes         | 11      | 11-A | 100    | McF_4 | 0   | last   | wholeT_0.01 | OT, OT-A             |
| 123 | Yes         | 11      | 11-A | 100    | McF_4 | 0   | last   | wholeT_0.5  | CBN, CBN-A, OT, OT-A |
| 124 | Yes         | 11      | 11-A | 100    | McF_4 | 0   | unif   | singleC     | CBN, CBN-A           |
| 125 | Yes         | 11      | 11-A | 100    | McF_4 | 0   | unif   | wholeT_0.01 | CBN                  |
| 126 | Yes         | 11      | 11-A | 100    | McF_4 | 0   | unif   | wholeT_0.5  | CBN, CBN-A           |
| 127 | Yes         | 11      | 11-A | 100    | McF_4 | Inf | last   | singleC     | CBN, CBN-A, OT, OT-A |
| 128 | Yes         | 11      | 11-A | 100    | McF_4 | Inf | last   | wholeT_0.01 | CBN, CBN-A, OT, OT-A |
| 129 | Yes         | 11      | 11-A | 100    | McF_4 | Inf | last   | wholeT_0.5  | CBN, CBN-A           |
| 130 | Yes         | 11      | 11-A | 100    | McF_4 | Inf | unif   | singleC     | CBN, CBN-A           |
| 131 | Yes         | 11      | 11-A | 100    | McF_4 | Inf | unif   | wholeT_0.01 | CBN, CBN-A           |
| 132 | Yes         | 11      | 11-A | 100    | McF_4 | Inf | unif   | wholeT_0.5  | CBN, CBN-A           |
| 133 | Yes         | 11      | 11-A | 100    | McF_6 | 0   | last   | singleC     | OT, OT-A             |
| 134 | Yes         | 11      | 11-A | 100    | McF_6 | 0   | last   | wholeT_0.01 | OT, OT-A             |
| 135 | Yes         | 11      | 11-A | 100    | McF_6 | 0   | last   | wholeT_0.5  | OT, OT-A             |
| 136 | Yes         | 11      | 11-A | 100    | McF_6 | 0   | unif   | singleC     | CBN, CBN-A, OT, OT-A |
| 137 | Yes         | 11      | 11-A | 100    | McF_6 | 0   | unif   | wholeT_0.01 | CBN, CBN-A, OT, OT-A |
| 138 | Yes         | 11      | 11-A | 100    | McF_6 | 0   | unif   | wholeT_0.5  | CBN, CBN-A, OT, OT-A |
| 139 | Yes         | 11      | 11-A | 100    | McF_6 | Inf | last   | singleC     | OT, OT-A             |
| 140 | Yes         | 11      | 11-A | 100    | McF_6 | Inf | last   | wholeT_0.01 | OT-A                 |
| 141 | Yes         | 11      | 11-A | 100    | McF_6 | Inf | last   | wholeT_0.5  | OT, OT-A             |
| 142 | Yes         | 11      | 11-A | 100    | McF_6 | Inf | unif   | singleC     | CBN, CBN-A, OT, OT-A |
| 143 | Yes         | 11      | 11-A | 100    | McF_6 | Inf | unif   | wholeT_0.01 | CBN, CBN-A, OT, OT-A |
| 144 | Yes         | 11      | 11-A | 100    | McF_6 | Inf | unif   | wholeT_0.5  | CBN-A, OT, OT-A      |
| 145 | Yes         | 9       | 9-A  | 1000   | Bozic | 0   | last   | singleC     | CBN, CBN-A           |
| 146 | Yes         | 9       | 9-A  | 1000   | Bozic | 0   | last   | wholeT_0.01 | CBN, CBN-A           |
| 147 | Yes         | 9       | 9-A  | 1000   | Bozic | 0   | last   | wholeT_0.5  | CBN, CBN-A           |
| 148 | Yes         | 9       | 9-A  | 1000   | Bozic | 0   | unif   | singleC     | CBN, CBN-A           |
| 149 | Yes         | 9       | 9-A  | 1000   | Bozic | 0   | unif   | wholeT_0.01 | CBN, CBN-A           |
| 150 | Yes         | 9       | 9-A  | 1000   | Bozic | 0   | unif   | wholeT_0.5  | CBN, CBN-A           |
| 151 | Yes         | 9       | 9-A  | 1000   | Bozic | Inf | last   | singleC     | CBN, CBN-A           |
| 152 | Yes         | 9       | 9-A  | 1000   | Bozic | Inf | last   | wholeT_0.01 | CBN, CBN-A           |
| 153 | Yes         | 9       | 9-A  | 1000   | Bozic | Inf | last   | wholeT_0.5  | CBN, CBN-A           |
| 154 | Yes         | 9       | 9-A  | 1000   | Bozic | Inf | unif   | singleC     | CBN, CBN-A           |
| 155 | Yes         | 9       | 9-A  | 1000   | Bozic | Inf | unif   | wholeT_0.01 | CBN, CBN-A           |
| 156 | Yes         | 9       | 9-A  | 1000   | Bozic | Inf | unif   | wholeT_0.5  | CBN                  |
| 157 | Yes         | 9       | 9-A  | 1000   | exp   | 0   | last   | singleC     | CBN, CBN-A           |

Table 3: (continued)

|     | Conjunction | Drivers | Tree | S.Size | Model | sh  | S.Time | S.Type      | Best method(s)       |
|-----|-------------|---------|------|--------|-------|-----|--------|-------------|----------------------|
| 158 | Yes         | 9       | 9-A  | 1000   | exp   | 0   | last   | wholeT_0.01 | CBN, CBN-A           |
| 159 | Yes         | 9       | 9-A  | 1000   | exp   | 0   | last   | wholeT_0.5  | CBN, CBN-A           |
| 160 | Yes         | 9       | 9-A  | 1000   | exp   | 0   | unif   | singleC     | CBN, CBN-A           |
| 161 | Yes         | 9       | 9-A  | 1000   | exp   | 0   | unif   | wholeT_0.01 | CBN, CBN-A           |
| 162 | Yes         | 9       | 9-A  | 1000   | exp   | 0   | unif   | wholeT_0.5  | CBN, CBN-A           |
| 163 | Yes         | 9       | 9-A  | 1000   | exp   | Inf | last   | singleC     | CBN, CBN-A           |
| 164 | Yes         | 9       | 9-A  | 1000   | exp   | Inf | last   | wholeT_0.01 | CBN, CBN-A           |
| 165 | Yes         | 9       | 9-A  | 1000   | exp   | Inf | last   | wholeT_0.5  | CBN, CBN-A           |
| 166 | Yes         | 9       | 9-A  | 1000   | exp   | Inf | unif   | singleC     | CBN, CBN-A           |
| 167 | Yes         | 9       | 9-A  | 1000   | exp   | Inf | unif   | wholeT_0.01 | CBN, CBN-A           |
| 168 | Yes         | 9       | 9-A  | 1000   | exp   | Inf | unif   | wholeT_0.5  | CBN, CBN-A           |
| 169 | Yes         | 9       | 9-A  | 1000   | McF_4 | 0   | last   | singleC     | CBN, CBN-A, OT, OT-A |
| 170 | Yes         | 9       | 9-A  | 1000   | McF_4 | 0   | last   | wholeT_0.01 | CBN                  |
| 171 | Yes         | 9       | 9-A  | 1000   | McF_4 | 0   | last   | wholeT_0.5  | CBN, CBN-A, OT, OT-A |
| 172 | Yes         | 9       | 9-A  | 1000   | McF_4 | 0   | unif   | singleC     | CBN, CBN-A           |
| 173 | Yes         | 9       | 9-A  | 1000   | McF_4 | 0   | unif   | wholeT_0.01 | CBN, CBN-A           |
| 174 | Yes         | 9       | 9-A  | 1000   | McF_4 | 0   | unif   | wholeT_0.5  | CBN, CBN-A           |
| 175 | Yes         | 9       | 9-A  | 1000   | McF_4 | Inf | last   | singleC     | CBN, CBN-A           |
| 176 | Yes         | 9       | 9-A  | 1000   | McF_4 | Inf | last   | wholeT_0.01 | CBN, CBN-A, OT-A     |
| 177 | Yes         | 9       | 9-A  | 1000   | McF_4 | Inf | last   | wholeT_0.5  | CBN, CBN-A           |
| 178 | Yes         | 9       | 9-A  | 1000   | McF_4 | Inf | unif   | singleC     | CBN, CBN-A           |
| 179 | Yes         | 9       | 9-A  | 1000   | McF_4 | Inf | unif   | wholeT_0.01 | CBN, CBN-A           |
| 180 | Yes         | 9       | 9-A  | 1000   | McF_4 | Inf | unif   | wholeT_0.5  | CBN, CBN-A           |
| 181 | Yes         | 9       | 9-A  | 1000   | McF_6 | 0   | last   | singleC     | OT-A                 |
| 182 | Yes         | 9       | 9-A  | 1000   | McF_6 | 0   | last   | wholeT_0.01 | DiP-A                |
| 183 | Yes         | 9       | 9-A  | 1000   | McF_6 | 0   | last   | wholeT_0.5  | OT-A                 |
| 184 | Yes         | 9       | 9-A  | 1000   | McF_6 | 0   | unif   | singleC     | CBN, CBN-A           |
| 185 | Yes         | 9       | 9-A  | 1000   | McF_6 | 0   | unif   | wholeT_0.01 | CBN, CBN-A           |
| 186 | Yes         | 9       | 9-A  | 1000   | McF_6 | 0   | unif   | wholeT_0.5  | CBN, CBN-A           |
| 187 | Yes         | 9       | 9-A  | 1000   | McF_6 | Inf | last   | singleC     | OT-A                 |
| 188 | Yes         | 9       | 9-A  | 1000   | McF_6 | Inf | last   | wholeT_0.01 | OT-A                 |
| 189 | Yes         | 9       | 9-A  | 1000   | McF_6 | Inf | last   | wholeT_0.5  | DiP-A, OT-A          |
| 190 | Yes         | 9       | 9-A  | 1000   | McF_6 | Inf | unif   | singleC     | CBN, CBN-A           |
| 191 | Yes         | 9       | 9-A  | 1000   | McF_6 | Inf | unif   | wholeT_0.01 | CBN, CBN-A           |
| 192 | Yes         | 9       | 9-A  | 1000   | McF_6 | Inf | unif   | wholeT_0.5  | CBN, CBN-A           |
| 193 | Yes         | 9       | 9-A  | 200    | Bozic | 0   | last   | singleC     | CBN, CBN-A           |
| 194 | Yes         | 9       | 9-A  | 200    | Bozic | 0   | last   | wholeT_0.01 | CBN, CBN-A           |
| 195 | Yes         | 9       | 9-A  | 200    | Bozic | 0   | last   | wholeT_0.5  | CBN, CBN-A           |
| 196 | Yes         | 9       | 9-A  | 200    | Bozic | 0   | unif   | singleC     | CBN, CBN-A           |
| 197 | Yes         | 9       | 9-A  | 200    | Bozic | 0   | unif   | wholeT_0.01 | CBN, CBN-A           |

Table 3: (continued)

|     | Conjunction | Drivers | Tree | S.Size | Model | sh  | S.Time | S.Type      | Best method(s)       |
|-----|-------------|---------|------|--------|-------|-----|--------|-------------|----------------------|
| 198 | Yes         | 9       | 9-A  | 200    | Bozic | 0   | unif   | wholeT_0.5  | CBN, CBN-A           |
| 199 | Yes         | 9       | 9-A  | 200    | Bozic | Inf | last   | singleC     | CBN, CBN-A           |
| 200 | Yes         | 9       | 9-A  | 200    | Bozic | Inf | last   | wholeT_0.01 | CBN, CBN-A           |
| 201 | Yes         | 9       | 9-A  | 200    | Bozic | Inf | last   | wholeT_0.5  | CBN, CBN-A           |
| 202 | Yes         | 9       | 9-A  | 200    | Bozic | Inf | unif   | singleC     | CBN, CBN-A           |
| 203 | Yes         | 9       | 9-A  | 200    | Bozic | Inf | unif   | wholeT_0.01 | CBN, CBN-A           |
| 204 | Yes         | 9       | 9-A  | 200    | Bozic | Inf | unif   | wholeT_0.5  | CBN, CBN-A           |
| 205 | Yes         | 9       | 9-A  | 200    | exp   | 0   | last   | singleC     | CBN, CBN-A           |
| 206 | Yes         | 9       | 9-A  | 200    | exp   | 0   | last   | wholeT_0.01 | CBN, CBN-A           |
| 207 | Yes         | 9       | 9-A  | 200    | exp   | 0   | last   | wholeT_0.5  | CBN, CBN-A           |
| 208 | Yes         | 9       | 9-A  | 200    | exp   | 0   | unif   | singleC     | CBN, CBN-A           |
| 209 | Yes         | 9       | 9-A  | 200    | exp   | 0   | unif   | wholeT_0.01 | CBN, CBN-A           |
| 210 | Yes         | 9       | 9-A  | 200    | exp   | 0   | unif   | wholeT_0.5  | CBN, CBN-A           |
| 211 | Yes         | 9       | 9-A  | 200    | exp   | Inf | last   | singleC     | CBN, CBN-A           |
| 212 | Yes         | 9       | 9-A  | 200    | exp   | Inf | last   | wholeT_0.01 | CBN, CBN-A           |
| 213 | Yes         | 9       | 9-A  | 200    | exp   | Inf | last   | wholeT_0.5  | CBN, CBN-A           |
| 214 | Yes         | 9       | 9-A  | 200    | exp   | Inf | unif   | singleC     | CBN, CBN-A           |
| 215 | Yes         | 9       | 9-A  | 200    | exp   | Inf | unif   | wholeT_0.01 | CBN, CBN-A           |
| 216 | Yes         | 9       | 9-A  | 200    | exp   | Inf | unif   | wholeT_0.5  | CBN, CBN-A           |
| 217 | Yes         | 9       | 9-A  | 200    | McF_4 | 0   | last   | singleC     | CBN, CBN-A, OT, OT-A |
| 218 | Yes         | 9       | 9-A  | 200    | McF_4 | 0   | last   | wholeT_0.01 | CBN, CBN-A, OT, OT-A |
| 219 | Yes         | 9       | 9-A  | 200    | McF_4 | 0   | last   | wholeT_0.5  | CBN, CBN-A           |
| 220 | Yes         | 9       | 9-A  | 200    | McF_4 | 0   | unif   | singleC     | CBN, CBN-A           |
| 221 | Yes         | 9       | 9-A  | 200    | McF_4 | 0   | unif   | wholeT_0.01 | CBN, CBN-A           |
| 222 | Yes         | 9       | 9-A  | 200    | McF_4 | 0   | unif   | wholeT_0.5  | CBN, CBN-A           |
| 223 | Yes         | 9       | 9-A  | 200    | McF_4 | Inf | last   | singleC     | CBN, CBN-A           |
| 224 | Yes         | 9       | 9-A  | 200    | McF_4 | Inf | last   | wholeT_0.01 | CBN, OT-A            |
| 225 | Yes         | 9       | 9-A  | 200    | McF_4 | Inf | last   | wholeT_0.5  | CBN, CBN-A           |
| 226 | Yes         | 9       | 9-A  | 200    | McF_4 | Inf | unif   | singleC     | CBN, CBN-A           |
| 227 | Yes         | 9       | 9-A  | 200    | McF_4 | Inf | unif   | wholeT_0.01 | CBN, CBN-A           |
| 228 | Yes         | 9       | 9-A  | 200    | McF_4 | Inf | unif   | wholeT_0.5  | CBN, CBN-A           |
| 229 | Yes         | 9       | 9-A  | 200    | McF_6 | 0   | last   | singleC     | OT-A                 |
| 230 | Yes         | 9       | 9-A  | 200    | McF_6 | 0   | last   | wholeT_0.01 | OT-A                 |
| 231 | Yes         | 9       | 9-A  | 200    | McF_6 | 0   | last   | wholeT_0.5  | OT-A                 |
| 232 | Yes         | 9       | 9-A  | 200    | McF_6 | 0   | unif   | singleC     | CBN, CBN-A           |
| 233 | Yes         | 9       | 9-A  | 200    | McF_6 | 0   | unif   | wholeT_0.01 | CBN, CBN-A           |
| 234 | Yes         | 9       | 9-A  | 200    | McF_6 | 0   | unif   | wholeT_0.5  | CBN, CBN-A           |
| 235 | Yes         | 9       | 9-A  | 200    | McF_6 | Inf | last   | singleC     | OT-A                 |
| 236 | Yes         | 9       | 9-A  | 200    | McF_6 | Inf | last   | wholeT_0.01 | OT-A                 |
| 237 | Yes         | 9       | 9-A  | 200    | McF_6 | Inf | last   | wholeT_0.5  | OT-A                 |

Table 3: (continued)

|     | Conjunction | Drivers | Tree | S.Size | Model | sh  | S.Time | S.Type      | Best method(s) |
|-----|-------------|---------|------|--------|-------|-----|--------|-------------|----------------|
| 238 | Yes         | 9       | 9-A  | 200    | McF_6 | Inf | unif   | singleC     | CBN, CBN-A     |
| 239 | Yes         | 9       | 9-A  | 200    | McF_6 | Inf | unif   | wholeT_0.01 | CBN, CBN-A     |
| 240 | Yes         | 9       | 9-A  | 200    | McF_6 | Inf | unif   | wholeT_0.5  | CBN, CBN-A     |
| 241 | Yes         | 9       | 9-A  | 100    | Bozic | 0   | last   | singleC     | CBN, CBN-A     |
| 242 | Yes         | 9       | 9-A  | 100    | Bozic | 0   | last   | wholeT_0.01 | CBN, CBN-A     |
| 243 | Yes         | 9       | 9-A  | 100    | Bozic | 0   | last   | wholeT_0.5  | CBN, CBN-A     |
| 244 | Yes         | 9       | 9-A  | 100    | Bozic | 0   | unif   | singleC     | CBN, CBN-A     |
| 245 | Yes         | 9       | 9-A  | 100    | Bozic | 0   | unif   | wholeT_0.01 | CBN, CBN-A     |
| 246 | Yes         | 9       | 9-A  | 100    | Bozic | 0   | unif   | wholeT_0.5  | CBN, CBN-A     |
| 247 | Yes         | 9       | 9-A  | 100    | Bozic | Inf | last   | singleC     | CBN, CBN-A     |
| 248 | Yes         | 9       | 9-A  | 100    | Bozic | Inf | last   | wholeT_0.01 | CBN, CBN-A     |
| 249 | Yes         | 9       | 9-A  | 100    | Bozic | Inf | last   | wholeT_0.5  | CBN, CBN-A     |
| 250 | Yes         | 9       | 9-A  | 100    | Bozic | Inf | unif   | singleC     | CBN, CBN-A     |
| 251 | Yes         | 9       | 9-A  | 100    | Bozic | Inf | unif   | wholeT_0.01 | CBN, CBN-A     |
| 252 | Yes         | 9       | 9-A  | 100    | Bozic | Inf | unif   | wholeT_0.5  | CBN, CBN-A     |
| 253 | Yes         | 9       | 9-A  | 100    | exp   | 0   | last   | singleC     | CBN            |
| 254 | Yes         | 9       | 9-A  | 100    | exp   | 0   | last   | wholeT_0.01 | CBN, CBN-A     |
| 255 | Yes         | 9       | 9-A  | 100    | exp   | 0   | last   | wholeT_0.5  | CBN, CBN-A     |
| 256 | Yes         | 9       | 9-A  | 100    | exp   | 0   | unif   | singleC     | CBN, CBN-A     |
| 257 | Yes         | 9       | 9-A  | 100    | exp   | 0   | unif   | wholeT_0.01 | CBN, CBN-A     |
| 258 | Yes         | 9       | 9-A  | 100    | exp   | 0   | unif   | wholeT_0.5  | CBN, CBN-A     |
| 259 | Yes         | 9       | 9-A  | 100    | exp   | Inf | last   | singleC     | CBN, CBN-A     |
| 260 | Yes         | 9       | 9-A  | 100    | exp   | Inf | last   | wholeT_0.01 | CBN, CBN-A     |
| 261 | Yes         | 9       | 9-A  | 100    | exp   | Inf | last   | wholeT_0.5  | CBN, CBN-A     |
| 262 | Yes         | 9       | 9-A  | 100    | exp   | Inf | unif   | singleC     | CBN, CBN-A     |
| 263 | Yes         | 9       | 9-A  | 100    | exp   | Inf | unif   | wholeT_0.01 | CBN, CBN-A     |
| 264 | Yes         | 9       | 9-A  | 100    | exp   | Inf | unif   | wholeT_0.5  | CBN, CBN-A     |
| 265 | Yes         | 9       | 9-A  | 100    | McF_4 | 0   | last   | singleC     | CBN, CBN-A     |
| 266 | Yes         | 9       | 9-A  | 100    | McF_4 | 0   | last   | wholeT_0.01 | CBN, CBN-A     |
| 267 | Yes         | 9       | 9-A  | 100    | McF_4 | 0   | last   | wholeT_0.5  | CBN, CBN-A     |
| 268 | Yes         | 9       | 9-A  | 100    | McF_4 | 0   | unif   | singleC     | CBN            |
| 269 | Yes         | 9       | 9-A  | 100    | McF_4 | 0   | unif   | wholeT_0.01 | CBN, CBN-A     |
| 270 | Yes         | 9       | 9-A  | 100    | McF_4 | 0   | unif   | wholeT_0.5  | CBN, CBN-A     |
| 271 | Yes         | 9       | 9-A  | 100    | McF_4 | Inf | last   | singleC     | CBN, CBN-A     |
| 272 | Yes         | 9       | 9-A  | 100    | McF_4 | Inf | last   | wholeT_0.01 | CBN            |
| 273 | Yes         | 9       | 9-A  | 100    | McF_4 | Inf | last   | wholeT_0.5  | CBN, CBN-A     |
| 274 | Yes         | 9       | 9-A  | 100    | McF_4 | Inf | unif   | singleC     | CBN, CBN-A     |
| 275 | Yes         | 9       | 9-A  | 100    | McF_4 | Inf | unif   | wholeT_0.01 | CBN, CBN-A     |
| 276 | Yes         | 9       | 9-A  | 100    | McF_4 | Inf | unif   | wholeT_0.5  | CBN, CBN-A     |
| 277 | Yes         | 9       | 9-A  | 100    | McF_6 | 0   | last   | singleC     | OT-A           |

Table 3: (continued)

|     | Conjunction | Drivers | Tree | S.Size | Model | sh  | S.Time | S.Type      | Best method(s)              |
|-----|-------------|---------|------|--------|-------|-----|--------|-------------|-----------------------------|
| 278 | Yes         | 9       | 9-A  | 100    | McF_6 | 0   | last   | wholeT_0.01 | OT-A                        |
| 279 | Yes         | 9       | 9-A  | 100    | McF_6 | 0   | last   | wholeT_0.5  | OT-A                        |
| 280 | Yes         | 9       | 9-A  | 100    | McF_6 | 0   | unif   | singleC     | CBN, CBN-A                  |
| 281 | Yes         | 9       | 9-A  | 100    | McF_6 | 0   | unif   | wholeT_0.01 | CBN, CBN-A                  |
| 282 | Yes         | 9       | 9-A  | 100    | McF_6 | 0   | unif   | wholeT_0.5  | CBN, CBN-A                  |
| 283 | Yes         | 9       | 9-A  | 100    | McF_6 | Inf | last   | singleC     | OT-A                        |
| 284 | Yes         | 9       | 9-A  | 100    | McF_6 | Inf | last   | wholeT_0.01 | OT-A                        |
| 285 | Yes         | 9       | 9-A  | 100    | McF_6 | Inf | last   | wholeT_0.5  | CBN, OT-A                   |
| 286 | Yes         | 9       | 9-A  | 100    | McF_6 | Inf | unif   | singleC     | CBN, CBN-A                  |
| 287 | Yes         | 9       | 9-A  | 100    | McF_6 | Inf | unif   | wholeT_0.01 | CBN-A                       |
| 288 | Yes         | 9       | 9-A  | 100    | McF_6 | Inf | unif   | wholeT_0.5  | CBN, CBN-A                  |
| 289 | Yes         | 7       | 7-A  | 1000   | Bozic | 0   | last   | singleC     | CBN, CBN-A, OT-A            |
| 290 | Yes         | 7       | 7-A  | 1000   | Bozic | 0   | last   | wholeT_0.01 | OT-A                        |
| 291 | Yes         | 7       | 7-A  | 1000   | Bozic | 0   | last   | wholeT_0.5  | CBN, CBN-A, OT-A            |
| 292 | Yes         | 7       | 7-A  | 1000   | Bozic | 0   | unif   | singleC     | CBN, CBN-A                  |
| 293 | Yes         | 7       | 7-A  | 1000   | Bozic | 0   | unif   | wholeT_0.01 | CBN, CBN-A                  |
| 294 | Yes         | 7       | 7-A  | 1000   | Bozic | 0   | unif   | wholeT_0.5  | CBN, CBN-A                  |
| 295 | Yes         | 7       | 7-A  | 1000   | Bozic | Inf | last   | singleC     | CBN, OT-A                   |
| 296 | Yes         | 7       | 7-A  | 1000   | Bozic | Inf | last   | wholeT_0.01 | CBN-A                       |
| 297 | Yes         | 7       | 7-A  | 1000   | Bozic | Inf | last   | wholeT_0.5  | OT-A                        |
| 298 | Yes         | 7       | 7-A  | 1000   | Bozic | Inf | unif   | singleC     | CBN, CBN-A                  |
| 299 | Yes         | 7       | 7-A  | 1000   | Bozic | Inf | unif   | wholeT_0.01 | CBN, CBN-A                  |
| 300 | Yes         | 7       | 7-A  | 1000   | Bozic | Inf | unif   | wholeT_0.5  | CBN, CBN-A                  |
| 301 | Yes         | 7       | 7-A  | 1000   | exp   | 0   | last   | singleC     | CBN-A                       |
| 302 | Yes         | 7       | 7-A  | 1000   | exp   | 0   | last   | wholeT_0.01 | CBN, CBN-A, OT-A            |
| 303 | Yes         | 7       | 7-A  | 1000   | exp   | 0   | last   | wholeT_0.5  | CBN, CBN-A                  |
| 304 | Yes         | 7       | 7-A  | 1000   | exp   | 0   | unif   | singleC     | CBN, CBN-A                  |
| 305 | Yes         | 7       | 7-A  | 1000   | exp   | 0   | unif   | wholeT_0.01 | CBN, CBN-A                  |
| 306 | Yes         | 7       | 7-A  | 1000   | exp   | 0   | unif   | wholeT_0.5  | CBN, CBN-A                  |
| 307 | Yes         | 7       | 7-A  | 1000   | exp   | Inf | last   | singleC     | CBN, CBN-A, OT-A            |
| 308 | Yes         | 7       | 7-A  | 1000   | exp   | Inf | last   | wholeT_0.01 | CBN-A                       |
| 309 | Yes         | 7       | 7-A  | 1000   | exp   | Inf | last   | wholeT_0.5  | CBN, CBN-A                  |
| 310 | Yes         | 7       | 7-A  | 1000   | exp   | Inf | unif   | singleC     | CBN, CBN-A                  |
| 311 | Yes         | 7       | 7-A  | 1000   | exp   | Inf | unif   | wholeT_0.01 | CBN, CBN-A                  |
| 312 | Yes         | 7       | 7-A  | 1000   | exp   | Inf | unif   | wholeT_0.5  | CBN, CBN-A                  |
| 313 | Yes         | 7       | 7-A  | 1000   | McF_4 | 0   | last   | singleC     | CBN, OT-A                   |
| 314 | Yes         | 7       | 7-A  | 1000   | McF_4 | 0   | last   | wholeT_0.01 | OT-A                        |
| 315 | Yes         | 7       | 7-A  | 1000   | McF_4 | 0   | last   | wholeT_0.5  | CBN, OT-A                   |
| 316 | Yes         | 7       | 7-A  | 1000   | McF_4 | 0   | unif   | singleC     | CBN, CBN-A, OT, OT-A        |
| 317 | Yes         | 7       | 7-A  | 1000   | McF_4 | 0   | unif   | wholeT_0.01 | CBN-A, DiP, DiP-A, OT, OT-A |



Table 3: (continued)

|     | Conjunction | Drivers | Tree | S.Size | Model | sh  | S.Time | S.Type      | Best method(s)       |
|-----|-------------|---------|------|--------|-------|-----|--------|-------------|----------------------|
| 318 | Yes         | 7       | 7-A  | 1000   | McF_4 | 0   | unif   | wholeT_0.5  | CBN, CBN-A, OT, OT-A |
| 319 | Yes         | 7       | 7-A  | 1000   | McF_4 | Inf | last   | singleC     | CBN, OT-A            |
| 320 | Yes         | 7       | 7-A  | 1000   | McF_4 | Inf | last   | wholeT_0.01 | CBN, OT-A            |
| 321 | Yes         | 7       | 7-A  | 1000   | McF_4 | Inf | last   | wholeT_0.5  | CBN                  |
| 322 | Yes         | 7       | 7-A  | 1000   | McF_4 | Inf | unif   | singleC     | CBN, CBN-A           |
| 323 | Yes         | 7       | 7-A  | 1000   | McF_4 | Inf | unif   | wholeT_0.01 | CBN, CBN-A, OT, OT-A |
| 324 | Yes         | 7       | 7-A  | 1000   | McF_4 | Inf | unif   | wholeT_0.5  | CBN, CBN-A           |
| 325 | Yes         | 7       | 7-A  | 1000   | McF_6 | 0   | last   | singleC     | DiP-A                |
| 326 | Yes         | 7       | 7-A  | 1000   | McF_6 | 0   | last   | wholeT_0.01 | DiP-A, OT-A          |
| 327 | Yes         | 7       | 7-A  | 1000   | McF_6 | 0   | last   | wholeT_0.5  | DiP-A                |
| 328 | Yes         | 7       | 7-A  | 1000   | McF_6 | 0   | unif   | singleC     | CBN-A                |
| 329 | Yes         | 7       | 7-A  | 1000   | McF_6 | 0   | unif   | wholeT_0.01 | CBN-A, DiP, DiP-A    |
| 330 | Yes         | 7       | 7-A  | 1000   | McF_6 | 0   | unif   | wholeT_0.5  | CBN-A                |
| 331 | Yes         | 7       | 7-A  | 1000   | McF_6 | Inf | last   | singleC     | CBN-A, DiP-A         |
| 332 | Yes         | 7       | 7-A  | 1000   | McF_6 | Inf | last   | wholeT_0.01 | DiP-A                |
| 333 | Yes         | 7       | 7-A  | 1000   | McF_6 | Inf | last   | wholeT_0.5  | CBN-A, DiP-A         |
| 334 | Yes         | 7       | 7-A  | 1000   | McF_6 | Inf | unif   | singleC     | CBN-A                |
| 335 | Yes         | 7       | 7-A  | 1000   | McF_6 | Inf | unif   | wholeT_0.01 | CBN-A                |
| 336 | Yes         | 7       | 7-A  | 1000   | McF_6 | Inf | unif   | wholeT_0.5  | CBN-A                |
| 337 | Yes         | 7       | 7-A  | 200    | Bozic | 0   | last   | singleC     | CBN, CBN-A           |
| 338 | Yes         | 7       | 7-A  | 200    | Bozic | 0   | last   | wholeT_0.01 | CBN, OT-A            |
| 339 | Yes         | 7       | 7-A  | 200    | Bozic | 0   | last   | wholeT_0.5  | CBN, CBN-A           |
| 340 | Yes         | 7       | 7-A  | 200    | Bozic | 0   | unif   | singleC     | CBN, CBN-A           |
| 341 | Yes         | 7       | 7-A  | 200    | Bozic | 0   | unif   | wholeT_0.01 | CBN, CBN-A           |
| 342 | Yes         | 7       | 7-A  | 200    | Bozic | 0   | unif   | wholeT_0.5  | CBN, CBN-A           |
| 343 | Yes         | 7       | 7-A  | 200    | Bozic | Inf | last   | singleC     | CBN, CBN-A, OT-A     |
| 344 | Yes         | 7       | 7-A  | 200    | Bozic | Inf | last   | wholeT_0.01 | CBN-A                |
| 345 | Yes         | 7       | 7-A  | 200    | Bozic | Inf | last   | wholeT_0.5  | CBN, OT-A            |
| 346 | Yes         | 7       | 7-A  | 200    | Bozic | Inf | unif   | singleC     | CBN, CBN-A           |
| 347 | Yes         | 7       | 7-A  | 200    | Bozic | Inf | unif   | wholeT_0.01 | CBN, CBN-A           |
| 348 | Yes         | 7       | 7-A  | 200    | Bozic | Inf | unif   | wholeT_0.5  | CBN, CBN-A           |
| 349 | Yes         | 7       | 7-A  | 200    | exp   | 0   | last   | singleC     | CBN, CBN-A           |
| 350 | Yes         | 7       | 7-A  | 200    | exp   | 0   | last   | wholeT_0.01 | CBN, CBN-A           |
| 351 | Yes         | 7       | 7-A  | 200    | exp   | 0   | last   | wholeT_0.5  | CBN, CBN-A           |
| 352 | Yes         | 7       | 7-A  | 200    | exp   | 0   | unif   | singleC     | CBN, CBN-A           |
| 353 | Yes         | 7       | 7-A  | 200    | exp   | 0   | unif   | wholeT_0.01 | CBN, CBN-A           |
| 354 | Yes         | 7       | 7-A  | 200    | exp   | 0   | unif   | wholeT_0.5  | CBN, CBN-A           |
| 355 | Yes         | 7       | 7-A  | 200    | exp   | Inf | last   | singleC     | CBN                  |
| 356 | Yes         | 7       | 7-A  | 200    | exp   | Inf | last   | wholeT_0.01 | CBN-A                |
| 357 | Yes         | 7       | 7-A  | 200    | exp   | Inf | last   | wholeT_0.5  | CBN                  |

Table 3: (continued)

|     | Conjunction | Drivers | Tree | S.Size | Model | sh  | S.Time | S.Type      | Best method(s)       |
|-----|-------------|---------|------|--------|-------|-----|--------|-------------|----------------------|
| 358 | Yes         | 7       | 7-A  | 200    | exp   | Inf | unif   | singleC     | CBN, CBN-A           |
| 359 | Yes         | 7       | 7-A  | 200    | exp   | Inf | unif   | wholeT_0.01 | CBN-A                |
| 360 | Yes         | 7       | 7-A  | 200    | exp   | Inf | unif   | wholeT_0.5  | CBN, CBN-A           |
| 361 | Yes         | 7       | 7-A  | 200    | McF_4 | 0   | last   | singleC     | CBN, OT-A            |
| 362 | Yes         | 7       | 7-A  | 200    | McF_4 | 0   | last   | wholeT_0.01 | OT-A                 |
| 363 | Yes         | 7       | 7-A  | 200    | McF_4 | 0   | last   | wholeT_0.5  | CBN, OT-A            |
| 364 | Yes         | 7       | 7-A  | 200    | McF_4 | 0   | unif   | singleC     | CBN, CBN-A           |
| 365 | Yes         | 7       | 7-A  | 200    | McF_4 | 0   | unif   | wholeT_0.01 | CBN, CBN-A, OT, OT-A |
| 366 | Yes         | 7       | 7-A  | 200    | McF_4 | 0   | unif   | wholeT_0.5  | CBN, CBN-A           |
| 367 | Yes         | 7       | 7-A  | 200    | McF_4 | Inf | last   | singleC     | CBN                  |
| 368 | Yes         | 7       | 7-A  | 200    | McF_4 | Inf | last   | wholeT_0.01 | CBN, OT-A            |
| 369 | Yes         | 7       | 7-A  | 200    | McF_4 | Inf | last   | wholeT_0.5  | CBN, CBN-A           |
| 370 | Yes         | 7       | 7-A  | 200    | McF_4 | Inf | unif   | singleC     | CBN, CBN-A           |
| 371 | Yes         | 7       | 7-A  | 200    | McF_4 | Inf | unif   | wholeT_0.01 | CBN, CBN-A           |
| 372 | Yes         | 7       | 7-A  | 200    | McF_4 | Inf | unif   | wholeT_0.5  | CBN, CBN-A           |
| 373 | Yes         | 7       | 7-A  | 200    | McF_6 | 0   | last   | singleC     | CBN, CBN-A, OT-A     |
| 374 | Yes         | 7       | 7-A  | 200    | McF_6 | 0   | last   | wholeT_0.01 | OT-A                 |
| 375 | Yes         | 7       | 7-A  | 200    | McF_6 | 0   | last   | wholeT_0.5  | CBN-A, OT-A          |
| 376 | Yes         | 7       | 7-A  | 200    | McF_6 | 0   | unif   | singleC     | CBN-A                |
| 377 | Yes         | 7       | 7-A  | 200    | McF_6 | 0   | unif   | wholeT_0.01 | CBN-A, OT, OT-A      |
| 378 | Yes         | 7       | 7-A  | 200    | McF_6 | 0   | unif   | wholeT_0.5  | CBN-A                |
| 379 | Yes         | 7       | 7-A  | 200    | McF_6 | Inf | last   | singleC     | CBN, CBN-A, OT-A     |
| 380 | Yes         | 7       | 7-A  | 200    | McF_6 | Inf | last   | wholeT_0.01 | OT-A                 |
| 381 | Yes         | 7       | 7-A  | 200    | McF_6 | Inf | last   | wholeT_0.5  | CBN, CBN-A, OT-A     |
| 382 | Yes         | 7       | 7-A  | 200    | McF_6 | Inf | unif   | singleC     | CBN-A                |
| 383 | Yes         | 7       | 7-A  | 200    | McF_6 | Inf | unif   | wholeT_0.01 | CBN-A                |
| 384 | Yes         | 7       | 7-A  | 200    | McF_6 | Inf | unif   | wholeT_0.5  | CBN-A                |
| 385 | Yes         | 7       | 7-A  | 100    | Bozic | 0   | last   | singleC     | CBN, CBN-A           |
| 386 | Yes         | 7       | 7-A  | 100    | Bozic | 0   | last   | wholeT_0.01 | CBN, OT-A            |
| 387 | Yes         | 7       | 7-A  | 100    | Bozic | 0   | last   | wholeT_0.5  | CBN, CBN-A           |
| 388 | Yes         | 7       | 7-A  | 100    | Bozic | 0   | unif   | singleC     | CBN, CBN-A           |
| 389 | Yes         | 7       | 7-A  | 100    | Bozic | 0   | unif   | wholeT_0.01 | CBN, CBN-A           |
| 390 | Yes         | 7       | 7-A  | 100    | Bozic | 0   | unif   | wholeT_0.5  | CBN, CBN-A           |
| 391 | Yes         | 7       | 7-A  | 100    | Bozic | Inf | last   | singleC     | CBN, CBN-A, OT-A     |
| 392 | Yes         | 7       | 7-A  | 100    | Bozic | Inf | last   | wholeT_0.01 | CBN-A                |
| 393 | Yes         | 7       | 7-A  | 100    | Bozic | Inf | last   | wholeT_0.5  | CBN, CBN-A           |
| 394 | Yes         | 7       | 7-A  | 100    | Bozic | Inf | unif   | singleC     | CBN, CBN-A           |
| 395 | Yes         | 7       | 7-A  | 100    | Bozic | Inf | unif   | wholeT_0.01 | CBN, CBN-A           |
| 396 | Yes         | 7       | 7-A  | 100    | Bozic | Inf | unif   | wholeT_0.5  | CBN, CBN-A           |
| 397 | Yes         | 7       | 7-A  | 100    | exp   | 0   | last   | singleC     | CBN, CBN-A           |

Table 3: (continued)

|     | Conjunction | Drivers | Tree | S.Size | Model | sh  | S.Time | S.Type      | Best method(s)       |
|-----|-------------|---------|------|--------|-------|-----|--------|-------------|----------------------|
| 398 | Yes         | 7       | 7-A  | 100    | exp   | 0   | last   | wholeT_0.01 | CBN, CBN-A           |
| 399 | Yes         | 7       | 7-A  | 100    | exp   | 0   | last   | wholeT_0.5  | CBN-A                |
| 400 | Yes         | 7       | 7-A  | 100    | exp   | 0   | unif   | singleC     | CBN, CBN-A           |
| 401 | Yes         | 7       | 7-A  | 100    | exp   | 0   | unif   | wholeT_0.01 | CBN, CBN-A           |
| 402 | Yes         | 7       | 7-A  | 100    | exp   | 0   | unif   | wholeT_0.5  | CBN, CBN-A           |
| 403 | Yes         | 7       | 7-A  | 100    | exp   | Inf | last   | singleC     | CBN, CBN-A           |
| 404 | Yes         | 7       | 7-A  | 100    | exp   | Inf | last   | wholeT_0.01 | CBN-A                |
| 405 | Yes         | 7       | 7-A  | 100    | exp   | Inf | last   | wholeT_0.5  | CBN                  |
| 406 | Yes         | 7       | 7-A  | 100    | exp   | Inf | unif   | singleC     | CBN, CBN-A           |
| 407 | Yes         | 7       | 7-A  | 100    | exp   | Inf | unif   | wholeT_0.01 | CBN, CBN-A           |
| 408 | Yes         | 7       | 7-A  | 100    | exp   | Inf | unif   | wholeT_0.5  | CBN, CBN-A           |
| 409 | Yes         | 7       | 7-A  | 100    | McF_4 | 0   | last   | singleC     | CBN, CBN-A, OT-A     |
| 410 | Yes         | 7       | 7-A  | 100    | McF_4 | 0   | last   | wholeT_0.01 | OT-A                 |
| 411 | Yes         | 7       | 7-A  | 100    | McF_4 | 0   | last   | wholeT_0.5  | CBN, OT-A            |
| 412 | Yes         | 7       | 7-A  | 100    | McF_4 | 0   | unif   | singleC     | CBN-A                |
| 413 | Yes         | 7       | 7-A  | 100    | McF_4 | 0   | unif   | wholeT_0.01 | CBN, CBN-A, OT-A     |
| 414 | Yes         | 7       | 7-A  | 100    | McF_4 | 0   | unif   | wholeT_0.5  | CBN-A                |
| 415 | Yes         | 7       | 7-A  | 100    | McF_4 | Inf | last   | singleC     | CBN, CBN-A           |
| 416 | Yes         | 7       | 7-A  | 100    | McF_4 | Inf | last   | wholeT_0.01 | CBN, CBN-A, OT-A     |
| 417 | Yes         | 7       | 7-A  | 100    | McF_4 | Inf | last   | wholeT_0.5  | CBN, CBN-A           |
| 418 | Yes         | 7       | 7-A  | 100    | McF_4 | Inf | unif   | singleC     | CBN, CBN-A           |
| 419 | Yes         | 7       | 7-A  | 100    | McF_4 | Inf | unif   | wholeT_0.01 | CBN, CBN-A           |
| 420 | Yes         | 7       | 7-A  | 100    | McF_4 | Inf | unif   | wholeT_0.5  | CBN, CBN-A           |
| 421 | Yes         | 7       | 7-A  | 100    | McF_6 | 0   | last   | singleC     | CBN, CBN-A, OT-A     |
| 422 | Yes         | 7       | 7-A  | 100    | McF_6 | 0   | last   | wholeT_0.01 | OT-A                 |
| 423 | Yes         | 7       | 7-A  | 100    | McF_6 | 0   | last   | wholeT_0.5  | CBN-A, OT-A          |
| 424 | Yes         | 7       | 7-A  | 100    | McF_6 | 0   | unif   | singleC     | CBN, CBN-A           |
| 425 | Yes         | 7       | 7-A  | 100    | McF_6 | 0   | unif   | wholeT_0.01 | CBN, CBN-A, OT, OT-A |
| 426 | Yes         | 7       | 7-A  | 100    | McF_6 | 0   | unif   | wholeT_0.5  | CBN-A                |
| 427 | Yes         | 7       | 7-A  | 100    | McF_6 | Inf | last   | singleC     | CBN, CBN-A, OT-A     |
| 428 | Yes         | 7       | 7-A  | 100    | McF_6 | Inf | last   | wholeT_0.01 | OT-A                 |
| 429 | Yes         | 7       | 7-A  | 100    | McF_6 | Inf | last   | wholeT_0.5  | CBN-A, OT-A          |
| 430 | Yes         | 7       | 7-A  | 100    | McF_6 | Inf | unif   | singleC     | CBN-A                |
| 431 | Yes         | 7       | 7-A  | 100    | McF_6 | Inf | unif   | wholeT_0.01 | CBN-A                |
| 432 | Yes         | 7       | 7-A  | 100    | McF_6 | Inf | unif   | wholeT_0.5  | CBN-A                |
| 433 | No          | 11      | 11-B | 1000   | Bozic | 0   | last   | singleC     | CBN, CBN-A, OT, OT-A |
| 434 | No          | 11      | 11-B | 1000   | Bozic | 0   | last   | wholeT_0.01 | OT, OT-A             |
| 435 | No          | 11      | 11-B | 1000   | Bozic | 0   | last   | wholeT_0.5  | CBN, CBN-A           |
| 436 | No          | 11      | 11-B | 1000   | Bozic | 0   | unif   | singleC     | CBN, CBN-A           |
| 437 | No          | 11      | 11-B | 1000   | Bozic | 0   | unif   | wholeT_0.01 | CBN, CBN-A           |

Table 3: (continued)

|     | Conjunction | Drivers | Tree | S.Size | Model | sh  | S.Time | S.Type      | Best method(s)         |
|-----|-------------|---------|------|--------|-------|-----|--------|-------------|------------------------|
| 438 | No          | 11      | 11-B | 1000   | Bozic | 0   | unif   | wholeT_0.5  | CBN, CBN-A             |
| 439 | No          | 11      | 11-B | 1000   | Bozic | Inf | last   | singleC     | CBN-A, OT, OT-A        |
| 440 | No          | 11      | 11-B | 1000   | Bozic | Inf | last   | wholeT_0.01 | CBN, CBN-A, OT, OT-A   |
| 441 | No          | 11      | 11-B | 1000   | Bozic | Inf | last   | wholeT_0.5  | CBN, CBN-A, OT, OT-A   |
| 442 | No          | 11      | 11-B | 1000   | Bozic | Inf | unif   | singleC     | CBN, CBN-A             |
| 443 | No          | 11      | 11-B | 1000   | Bozic | Inf | unif   | wholeT_0.01 | CBN, CBN-A, OT, OT-A   |
| 444 | No          | 11      | 11-B | 1000   | Bozic | Inf | unif   | wholeT_0.5  | CBN, CBN-A             |
| 445 | No          | 11      | 11-B | 1000   | exp   | 0   | last   | singleC     | CBN, CBN-A             |
| 446 | No          | 11      | 11-B | 1000   | exp   | 0   | last   | wholeT_0.01 | CBN, CBN-A             |
| 447 | No          | 11      | 11-B | 1000   | exp   | 0   | last   | wholeT_0.5  | CBN, CBN-A             |
| 448 | No          | 11      | 11-B | 1000   | exp   | 0   | unif   | singleC     | CBN, CBN-A             |
| 449 | No          | 11      | 11-B | 1000   | exp   | 0   | unif   | wholeT_0.01 | CBN, CBN-A             |
| 450 | No          | 11      | 11-B | 1000   | exp   | 0   | unif   | wholeT_0.5  | CBN, CBN-A             |
| 451 | No          | 11      | 11-B | 1000   | exp   | Inf | last   | singleC     | CBN, CBN-A, OT, OT-A   |
| 452 | No          | 11      | 11-B | 1000   | exp   | Inf | last   | wholeT_0.01 | CBN, CBN-A, OT, OT-A   |
| 453 | No          | 11      | 11-B | 1000   | exp   | Inf | last   | wholeT_0.5  | CBN-A, OT, OT-A        |
| 454 | No          | 11      | 11-B | 1000   | exp   | Inf | unif   | singleC     | CBN, CBN-A             |
| 455 | No          | 11      | 11-B | 1000   | exp   | Inf | unif   | wholeT_0.01 | CBN, CBN-A             |
| 456 | No          | 11      | 11-B | 1000   | exp   | Inf | unif   | wholeT_0.5  | CBN, CBN-A             |
| 457 | No          | 11      | 11-B | 1000   | McF_4 | 0   | last   | singleC     | OT, OT-A               |
| 458 | No          | 11      | 11-B | 1000   | McF_4 | 0   | last   | wholeT_0.01 | DiP, DiP-A, OT, OT-A   |
| 459 | No          | 11      | 11-B | 1000   | McF_4 | 0   | last   | wholeT_0.5  | OT, OT-A               |
| 460 | No          | 11      | 11-B | 1000   | McF_4 | 0   | unif   | singleC     | OT, OT-A               |
| 461 | No          | 11      | 11-B | 1000   | McF_4 | 0   | unif   | wholeT_0.01 | CBN-A, OT, OT-A        |
| 462 | No          | 11      | 11-B | 1000   | McF_4 | 0   | unif   | wholeT_0.5  | CBN, OT, OT-A          |
| 463 | No          | 11      | 11-B | 1000   | McF_4 | Inf | last   | singleC     | OT, OT-A               |
| 464 | No          | 11      | 11-B | 1000   | McF_4 | Inf | last   | wholeT_0.01 | OT, OT-A               |
| 465 | No          | 11      | 11-B | 1000   | McF_4 | Inf | last   | wholeT_0.5  | CBN-A, DiP-A, OT, OT-A |
| 466 | No          | 11      | 11-B | 1000   | McF_4 | Inf | unif   | singleC     | CBN, CBN-A, OT, OT-A   |
| 467 | No          | 11      | 11-B | 1000   | McF_4 | Inf | unif   | wholeT_0.01 | CBN, CBN-A, OT, OT-A   |
| 468 | No          | 11      | 11-B | 1000   | McF_4 | Inf | unif   | wholeT_0.5  | CBN, CBN-A, OT, OT-A   |
| 469 | No          | 11      | 11-B | 1000   | McF_6 | 0   | last   | singleC     | DiP, DiP-A, OT, OT-A   |
| 470 | No          | 11      | 11-B | 1000   | McF_6 | 0   | last   | wholeT_0.01 | DiP, DiP-A, OT, OT-A   |
| 471 | No          | 11      | 11-B | 1000   | McF_6 | 0   | last   | wholeT_0.5  | DiP, DiP-A, OT, OT-A   |
| 472 | No          | 11      | 11-B | 1000   | McF_6 | 0   | unif   | singleC     | DiP, DiP-A, OT, OT-A   |
| 473 | No          | 11      | 11-B | 1000   | McF_6 | 0   | unif   | wholeT_0.01 | DiP, DiP-A, OT, OT-A   |
| 474 | No          | 11      | 11-B | 1000   | McF_6 | 0   | unif   | wholeT_0.5  | DiP, DiP-A, OT, OT-A   |
| 475 | No          | 11      | 11-B | 1000   | McF_6 | Inf | last   | singleC     | DiP, DiP-A, OT, OT-A   |
| 476 | No          | 11      | 11-B | 1000   | McF_6 | Inf | last   | wholeT_0.01 | DiP-A, OT, OT-A        |
| 477 | No          | 11      | 11-B | 1000   | McF_6 | Inf | last   | wholeT_0.5  | DiP, DiP-A, OT, OT-A   |

Table 3: (continued)

|     | Conjunction | Drivers | Tree | S.Size | Model | sh  | S.Time | S.Type      | Best method(s)       |
|-----|-------------|---------|------|--------|-------|-----|--------|-------------|----------------------|
| 478 | No          | 11      | 11-B | 1000   | McF_6 | Inf | unif   | singleC     | DiP, DiP-A, OT, OT-A |
| 479 | No          | 11      | 11-B | 1000   | McF_6 | Inf | unif   | wholeT_0.01 | DiP, DiP-A, OT, OT-A |
| 480 | No          | 11      | 11-B | 1000   | McF_6 | Inf | unif   | wholeT_0.5  | DiP, DiP-A, OT, OT-A |
| 481 | No          | 11      | 11-B | 200    | Bozic | 0   | last   | singleC     | CBN, CBN-A           |
| 482 | No          | 11      | 11-B | 200    | Bozic | 0   | last   | wholeT_0.01 | CBN, CBN-A           |
| 483 | No          | 11      | 11-B | 200    | Bozic | 0   | last   | wholeT_0.5  | CBN, CBN-A           |
| 484 | No          | 11      | 11-B | 200    | Bozic | 0   | unif   | singleC     | CBN, CBN-A           |
| 485 | No          | 11      | 11-B | 200    | Bozic | 0   | unif   | wholeT_0.01 | CBN, CBN-A           |
| 486 | No          | 11      | 11-B | 200    | Bozic | 0   | unif   | wholeT_0.5  | CBN, CBN-A           |
| 487 | No          | 11      | 11-B | 200    | Bozic | Inf | last   | singleC     | CBN, CBN-A, OT, OT-A |
| 488 | No          | 11      | 11-B | 200    | Bozic | Inf | last   | wholeT_0.01 | CBN, CBN-A, OT, OT-A |
| 489 | No          | 11      | 11-B | 200    | Bozic | Inf | last   | wholeT_0.5  | CBN, CBN-A, OT, OT-A |
| 490 | No          | 11      | 11-B | 200    | Bozic | Inf | unif   | singleC     | CBN, CBN-A           |
| 491 | No          | 11      | 11-B | 200    | Bozic | Inf | unif   | wholeT_0.01 | CBN, CBN-A           |
| 492 | No          | 11      | 11-B | 200    | Bozic | Inf | unif   | wholeT_0.5  | CBN, CBN-A           |
| 493 | No          | 11      | 11-B | 200    | exp   | 0   | last   | singleC     | CBN, CBN-A           |
| 494 | No          | 11      | 11-B | 200    | exp   | 0   | last   | wholeT_0.01 | CBN, CBN-A           |
| 495 | No          | 11      | 11-B | 200    | exp   | 0   | last   | wholeT_0.5  | CBN, CBN-A           |
| 496 | No          | 11      | 11-B | 200    | exp   | 0   | unif   | singleC     | CBN, CBN-A           |
| 497 | No          | 11      | 11-B | 200    | exp   | 0   | unif   | wholeT_0.01 | CBN, CBN-A           |
| 498 | No          | 11      | 11-B | 200    | exp   | 0   | unif   | wholeT_0.5  | CBN, CBN-A           |
| 499 | No          | 11      | 11-B | 200    | exp   | Inf | last   | singleC     | CBN, CBN-A, OT, OT-A |
| 500 | No          | 11      | 11-B | 200    | exp   | Inf | last   | wholeT_0.01 | CBN, CBN-A           |
| 501 | No          | 11      | 11-B | 200    | exp   | Inf | last   | wholeT_0.5  | CBN, CBN-A, OT, OT-A |
| 502 | No          | 11      | 11-B | 200    | exp   | Inf | unif   | singleC     | CBN, CBN-A           |
| 503 | No          | 11      | 11-B | 200    | exp   | Inf | unif   | wholeT_0.01 | CBN, CBN-A           |
| 504 | No          | 11      | 11-B | 200    | exp   | Inf | unif   | wholeT_0.5  | CBN, CBN-A           |
| 505 | No          | 11      | 11-B | 200    | McF_4 | 0   | last   | singleC     | OT, OT-A             |
| 506 | No          | 11      | 11-B | 200    | McF_4 | 0   | last   | wholeT_0.01 | OT, OT-A             |
| 507 | No          | 11      | 11-B | 200    | McF_4 | 0   | last   | wholeT_0.5  | OT, OT-A             |
| 508 | No          | 11      | 11-B | 200    | McF_4 | 0   | unif   | singleC     | CBN, CBN-A           |
| 509 | No          | 11      | 11-B | 200    | McF_4 | 0   | unif   | wholeT_0.01 | CBN, CBN-A           |
| 510 | No          | 11      | 11-B | 200    | McF_4 | 0   | unif   | wholeT_0.5  | CBN, CBN-A           |
| 511 | No          | 11      | 11-B | 200    | McF_4 | Inf | last   | singleC     | CBN, CBN-A, OT, OT-A |
| 512 | No          | 11      | 11-B | 200    | McF_4 | Inf | last   | wholeT_0.01 | OT, OT-A             |
| 513 | No          | 11      | 11-B | 200    | McF_4 | Inf | last   | wholeT_0.5  | CBN, CBN-A, OT, OT-A |
| 514 | No          | 11      | 11-B | 200    | McF_4 | Inf | unif   | singleC     | CBN, CBN-A           |
| 515 | No          | 11      | 11-B | 200    | McF_4 | Inf | unif   | wholeT_0.01 | CBN, CBN-A           |
| 516 | No          | 11      | 11-B | 200    | McF_4 | Inf | unif   | wholeT_0.5  | CBN, CBN-A           |
| 517 | No          | 11      | 11-B | 200    | McF_6 | 0   | last   | singleC     | OT, OT-A             |

Table 3: (continued)

|     | Conjunction | Drivers | Tree | S.Size | Model | sh  | S.Time | S.Type      | Best method(s)       |
|-----|-------------|---------|------|--------|-------|-----|--------|-------------|----------------------|
| 518 | No          | 11      | 11-B | 200    | McF_6 | 0   | last   | wholeT_0.01 | OT, OT-A             |
| 519 | No          | 11      | 11-B | 200    | McF_6 | 0   | last   | wholeT_0.5  | OT, OT-A             |
| 520 | No          | 11      | 11-B | 200    | McF_6 | 0   | unif   | singleC     | OT, OT-A             |
| 521 | No          | 11      | 11-B | 200    | McF_6 | 0   | unif   | wholeT_0.01 | CBN-A, OT, OT-A      |
| 522 | No          | 11      | 11-B | 200    | McF_6 | 0   | unif   | wholeT_0.5  | OT, OT-A             |
| 523 | No          | 11      | 11-B | 200    | McF_6 | Inf | last   | singleC     | OT, OT-A             |
| 524 | No          | 11      | 11-B | 200    | McF_6 | Inf | last   | wholeT_0.01 | OT, OT-A             |
| 525 | No          | 11      | 11-B | 200    | McF_6 | Inf | last   | wholeT_0.5  | OT, OT-A             |
| 526 | No          | 11      | 11-B | 200    | McF_6 | Inf | unif   | singleC     | OT, OT-A             |
| 527 | No          | 11      | 11-B | 200    | McF_6 | Inf | unif   | wholeT_0.01 | OT, OT-A             |
| 528 | No          | 11      | 11-B | 200    | McF_6 | Inf | unif   | wholeT_0.5  | OT, OT-A             |
| 529 | No          | 11      | 11-B | 100    | Bozic | 0   | last   | singleC     | CBN, CBN-A           |
| 530 | No          | 11      | 11-B | 100    | Bozic | 0   | last   | wholeT_0.01 | CBN, CBN-A           |
| 531 | No          | 11      | 11-B | 100    | Bozic | 0   | last   | wholeT_0.5  | CBN, CBN-A           |
| 532 | No          | 11      | 11-B | 100    | Bozic | 0   | unif   | singleC     | CBN, CBN-A           |
| 533 | No          | 11      | 11-B | 100    | Bozic | 0   | unif   | wholeT_0.01 | CBN, CBN-A           |
| 534 | No          | 11      | 11-B | 100    | Bozic | 0   | unif   | wholeT_0.5  | CBN, CBN-A           |
| 535 | No          | 11      | 11-B | 100    | Bozic | Inf | last   | singleC     | CBN, CBN-A, OT, OT-A |
| 536 | No          | 11      | 11-B | 100    | Bozic | Inf | last   | wholeT_0.01 | CBN, CBN-A, OT, OT-A |
| 537 | No          | 11      | 11-B | 100    | Bozic | Inf | last   | wholeT_0.5  | CBN, CBN-A, OT, OT-A |
| 538 | No          | 11      | 11-B | 100    | Bozic | Inf | unif   | singleC     | CBN, CBN-A           |
| 539 | No          | 11      | 11-B | 100    | Bozic | Inf | unif   | wholeT_0.01 | CBN, CBN-A           |
| 540 | No          | 11      | 11-B | 100    | Bozic | Inf | unif   | wholeT_0.5  | CBN, CBN-A           |
| 541 | No          | 11      | 11-B | 100    | exp   | 0   | last   | singleC     | CBN, CBN-A           |
| 542 | No          | 11      | 11-B | 100    | exp   | 0   | last   | wholeT_0.01 | CBN, CBN-A           |
| 543 | No          | 11      | 11-B | 100    | exp   | 0   | last   | wholeT_0.5  | CBN, CBN-A           |
| 544 | No          | 11      | 11-B | 100    | exp   | 0   | unif   | singleC     | CBN, CBN-A           |
| 545 | No          | 11      | 11-B | 100    | exp   | 0   | unif   | wholeT_0.01 | CBN, CBN-A           |
| 546 | No          | 11      | 11-B | 100    | exp   | 0   | unif   | wholeT_0.5  | CBN, CBN-A           |
| 547 | No          | 11      | 11-B | 100    | exp   | Inf | last   | singleC     | CBN, CBN-A           |
| 548 | No          | 11      | 11-B | 100    | exp   | Inf | last   | wholeT_0.01 | CBN, CBN-A           |
| 549 | No          | 11      | 11-B | 100    | exp   | Inf | last   | wholeT_0.5  | CBN, CBN-A           |
| 550 | No          | 11      | 11-B | 100    | exp   | Inf | unif   | singleC     | CBN, CBN-A           |
| 551 | No          | 11      | 11-B | 100    | exp   | Inf | unif   | wholeT_0.01 | CBN, CBN-A           |
| 552 | No          | 11      | 11-B | 100    | exp   | Inf | unif   | wholeT_0.5  | CBN, CBN-A           |
| 553 | No          | 11      | 11-B | 100    | McF_4 | 0   | last   | singleC     | CBN-A, OT, OT-A      |
| 554 | No          | 11      | 11-B | 100    | McF_4 | 0   | last   | wholeT_0.01 | OT, OT-A             |
| 555 | No          | 11      | 11-B | 100    | McF_4 | 0   | last   | wholeT_0.5  | CBN-A, OT, OT-A      |
| 556 | No          | 11      | 11-B | 100    | McF_4 | 0   | unif   | singleC     | CBN, CBN-A           |
| 557 | No          | 11      | 11-B | 100    | McF_4 | 0   | unif   | wholeT_0.01 | CBN, CBN-A           |

Table 3: (continued)

|     | Conjunction | Drivers | Tree | S.Size | Model | sh  | S.Time | S.Type      | Best method(s)       |
|-----|-------------|---------|------|--------|-------|-----|--------|-------------|----------------------|
| 558 | No          | 11      | 11-B | 100    | McF_4 | 0   | unif   | wholeT_0.5  | CBN, CBN-A           |
| 559 | No          | 11      | 11-B | 100    | McF_4 | Inf | last   | singleC     | CBN, CBN-A, OT, OT-A |
| 560 | No          | 11      | 11-B | 100    | McF_4 | Inf | last   | wholeT_0.01 | OT, OT-A             |
| 561 | No          | 11      | 11-B | 100    | McF_4 | Inf | last   | wholeT_0.5  | CBN-A, OT, OT-A      |
| 562 | No          | 11      | 11-B | 100    | McF_4 | Inf | unif   | singleC     | CBN, CBN-A           |
| 563 | No          | 11      | 11-B | 100    | McF_4 | Inf | unif   | wholeT_0.01 | CBN, CBN-A           |
| 564 | No          | 11      | 11-B | 100    | McF_4 | Inf | unif   | wholeT_0.5  | CBN, CBN-A           |
| 565 | No          | 11      | 11-B | 100    | McF_6 | 0   | last   | singleC     | OT, OT-A             |
| 566 | No          | 11      | 11-B | 100    | McF_6 | 0   | last   | wholeT_0.01 | OT, OT-A             |
| 567 | No          | 11      | 11-B | 100    | McF_6 | 0   | last   | wholeT_0.5  | OT, OT-A             |
| 568 | No          | 11      | 11-B | 100    | McF_6 | 0   | unif   | singleC     | CBN, CBN-A, OT, OT-A |
| 569 | No          | 11      | 11-B | 100    | McF_6 | 0   | unif   | wholeT_0.01 | OT, OT-A             |
| 570 | No          | 11      | 11-B | 100    | McF_6 | 0   | unif   | wholeT_0.5  | OT, OT-A             |
| 571 | No          | 11      | 11-B | 100    | McF_6 | Inf | last   | singleC     | OT, OT-A             |
| 572 | No          | 11      | 11-B | 100    | McF_6 | Inf | last   | wholeT_0.01 | OT, OT-A             |
| 573 | No          | 11      | 11-B | 100    | McF_6 | Inf | last   | wholeT_0.5  | OT, OT-A             |
| 574 | No          | 11      | 11-B | 100    | McF_6 | Inf | unif   | singleC     | CBN, CBN-A, OT, OT-A |
| 575 | No          | 11      | 11-B | 100    | McF_6 | Inf | unif   | wholeT_0.01 | CBN, CBN-A, OT, OT-A |
| 576 | No          | 11      | 11-B | 100    | McF_6 | Inf | unif   | wholeT_0.5  | CBN, CBN-A, OT, OT-A |
| 577 | No          | 9       | 9-B  | 1000   | Bozic | 0   | last   | singleC     | CBN, CBN-A, OT, OT-A |
| 578 | No          | 9       | 9-B  | 1000   | Bozic | 0   | last   | wholeT_0.01 | OT, OT-A             |
| 579 | No          | 9       | 9-B  | 1000   | Bozic | 0   | last   | wholeT_0.5  | CBN, CBN-A, OT, OT-A |
| 580 | No          | 9       | 9-B  | 1000   | Bozic | 0   | unif   | singleC     | CBN, CBN-A           |
| 581 | No          | 9       | 9-B  | 1000   | Bozic | 0   | unif   | wholeT_0.01 | CBN, CBN-A           |
| 582 | No          | 9       | 9-B  | 1000   | Bozic | 0   | unif   | wholeT_0.5  | CBN, CBN-A           |
| 583 | No          | 9       | 9-B  | 1000   | Bozic | Inf | last   | singleC     | OT, OT-A             |
| 584 | No          | 9       | 9-B  | 1000   | Bozic | Inf | last   | wholeT_0.01 | DiP, DiP-A, OT, OT-A |
| 585 | No          | 9       | 9-B  | 1000   | Bozic | Inf | last   | wholeT_0.5  | OT, OT-A             |
| 586 | No          | 9       | 9-B  | 1000   | Bozic | Inf | unif   | singleC     | CBN, OT, OT-A        |
| 587 | No          | 9       | 9-B  | 1000   | Bozic | Inf | unif   | wholeT_0.01 | CBN-A, OT, OT-A      |
| 588 | No          | 9       | 9-B  | 1000   | Bozic | Inf | unif   | wholeT_0.5  | CBN, CBN-A, OT, OT-A |
| 589 | No          | 9       | 9-B  | 1000   | exp   | 0   | last   | singleC     | CBN, CBN-A           |
| 590 | No          | 9       | 9-B  | 1000   | exp   | 0   | last   | wholeT_0.01 | CBN, CBN-A           |
| 591 | No          | 9       | 9-B  | 1000   | exp   | 0   | last   | wholeT_0.5  | CBN, CBN-A           |
| 592 | No          | 9       | 9-B  | 1000   | exp   | 0   | unif   | singleC     | CBN, CBN-A           |
| 593 | No          | 9       | 9-B  | 1000   | exp   | 0   | unif   | wholeT_0.01 | CBN, CBN-A           |
| 594 | No          | 9       | 9-B  | 1000   | exp   | 0   | unif   | wholeT_0.5  | CBN, CBN-A           |
| 595 | No          | 9       | 9-B  | 1000   | exp   | Inf | last   | singleC     | OT, OT-A             |
| 596 | No          | 9       | 9-B  | 1000   | exp   | Inf | last   | wholeT_0.01 | OT, OT-A             |
| 597 | No          | 9       | 9-B  | 1000   | exp   | Inf | last   | wholeT_0.5  | OT, OT-A             |

Table 3: (continued)

|     | Conjunction | Drivers | Tree | S.Size | Model | sh  | S.Time | S.Type      | Best method(s)                   |
|-----|-------------|---------|------|--------|-------|-----|--------|-------------|----------------------------------|
| 598 | No          | 9       | 9-B  | 1000   | exp   | Inf | unif   | singleC     | CBN, CBN-A, OT, OT-A             |
| 599 | No          | 9       | 9-B  | 1000   | exp   | Inf | unif   | wholeT_0.01 | CBN, CBN-A, OT, OT-A             |
| 600 | No          | 9       | 9-B  | 1000   | exp   | Inf | unif   | wholeT_0.5  | CBN, CBN-A                       |
| 601 | No          | 9       | 9-B  | 1000   | McF_4 | 0   | last   | singleC     | DiP-A, OT, OT-A                  |
| 602 | No          | 9       | 9-B  | 1000   | McF_4 | 0   | last   | wholeT_0.01 | DiP, DiP-A, OT, OT-A             |
| 603 | No          | 9       | 9-B  | 1000   | McF_4 | 0   | last   | wholeT_0.5  | OT, OT-A                         |
| 604 | No          | 9       | 9-B  | 1000   | McF_4 | 0   | unif   | singleC     | OT, OT-A                         |
| 605 | No          | 9       | 9-B  | 1000   | McF_4 | 0   | unif   | wholeT_0.01 | OT, OT-A                         |
| 606 | No          | 9       | 9-B  | 1000   | McF_4 | 0   | unif   | wholeT_0.5  | OT, OT-A                         |
| 607 | No          | 9       | 9-B  | 1000   | McF_4 | Inf | last   | singleC     | OT, OT-A                         |
| 608 | No          | 9       | 9-B  | 1000   | McF_4 | Inf | last   | wholeT_0.01 | DiP, DiP-A, OT, OT-A             |
| 609 | No          | 9       | 9-B  | 1000   | McF_4 | Inf | last   | wholeT_0.5  | OT, OT-A                         |
| 610 | No          | 9       | 9-B  | 1000   | McF_4 | Inf | unif   | singleC     | OT, OT-A                         |
| 611 | No          | 9       | 9-B  | 1000   | McF_4 | Inf | unif   | wholeT_0.01 | OT, OT-A                         |
| 612 | No          | 9       | 9-B  | 1000   | McF_4 | Inf | unif   | wholeT_0.5  | OT, OT-A                         |
| 613 | No          | 9       | 9-B  | 1000   | McF_6 | 0   | last   | singleC     | DiP-A, OT-A                      |
| 614 | No          | 9       | 9-B  | 1000   | McF_6 | 0   | last   | wholeT_0.01 | DiP-A, OT-A                      |
| 615 | No          | 9       | 9-B  | 1000   | McF_6 | 0   | last   | wholeT_0.5  | DiP-A, OT-A                      |
| 616 | No          | 9       | 9-B  | 1000   | McF_6 | 0   | unif   | singleC     | DiP, DiP-A, OT, OT-A             |
| 617 | No          | 9       | 9-B  | 1000   | McF_6 | 0   | unif   | wholeT_0.01 | DiP, DiP-A, OT, OT-A             |
| 618 | No          | 9       | 9-B  | 1000   | McF_6 | 0   | unif   | wholeT_0.5  | CBN, CBN-A, DiP, DiP-A, OT, OT-A |
| 619 | No          | 9       | 9-B  | 1000   | McF_6 | Inf | last   | singleC     | DiP-A, OT-A                      |
| 620 | No          | 9       | 9-B  | 1000   | McF_6 | Inf | last   | wholeT_0.01 | DiP-A, OT-A                      |
| 621 | No          | 9       | 9-B  | 1000   | McF_6 | Inf | last   | wholeT_0.5  | DiP-A, OT-A                      |
| 622 | No          | 9       | 9-B  | 1000   | McF_6 | Inf | unif   | singleC     | CBN-A, DiP, DiP-A, OT, OT-A      |
| 623 | No          | 9       | 9-B  | 1000   | McF_6 | Inf | unif   | wholeT_0.01 | DiP, DiP-A, OT, OT-A             |
| 624 | No          | 9       | 9-B  | 1000   | McF_6 | Inf | unif   | wholeT_0.5  | DiP, DiP-A, OT, OT-A             |
| 625 | No          | 9       | 9-B  | 200    | Bozic | 0   | last   | singleC     | CBN, CBN-A, OT, OT-A             |
| 626 | No          | 9       | 9-B  | 200    | Bozic | 0   | last   | wholeT_0.01 | CBN, CBN-A, OT, OT-A             |
| 627 | No          | 9       | 9-B  | 200    | Bozic | 0   | last   | wholeT_0.5  | CBN, CBN-A                       |
| 628 | No          | 9       | 9-B  | 200    | Bozic | 0   | unif   | singleC     | CBN, CBN-A                       |
| 629 | No          | 9       | 9-B  | 200    | Bozic | 0   | unif   | wholeT_0.01 | CBN, CBN-A                       |
| 630 | No          | 9       | 9-B  | 200    | Bozic | 0   | unif   | wholeT_0.5  | CBN, CBN-A                       |
| 631 | No          | 9       | 9-B  | 200    | Bozic | Inf | last   | singleC     | OT, OT-A                         |
| 632 | No          | 9       | 9-B  | 200    | Bozic | Inf | last   | wholeT_0.01 | CBN, OT, OT-A                    |
| 633 | No          | 9       | 9-B  | 200    | Bozic | Inf | last   | wholeT_0.5  | OT, OT-A                         |
| 634 | No          | 9       | 9-B  | 200    | Bozic | Inf | unif   | singleC     | CBN, CBN-A                       |
| 635 | No          | 9       | 9-B  | 200    | Bozic | Inf | unif   | wholeT_0.01 | CBN-A                            |
| 636 | No          | 9       | 9-B  | 200    | Bozic | Inf | unif   | wholeT_0.5  | CBN, CBN-A                       |
| 637 | No          | 9       | 9-B  | 200    | exp   | 0   | last   | singleC     | CBN, CBN-A                       |



Table 3: (continued)

|     | Conjunction | Drivers | Tree | S.Size | Model | sh  | S.Time | S.Type      | Best method(s)       |
|-----|-------------|---------|------|--------|-------|-----|--------|-------------|----------------------|
| 638 | No          | 9       | 9-B  | 200    | exp   | 0   | last   | wholeT_0.01 | CBN, CBN-A           |
| 639 | No          | 9       | 9-B  | 200    | exp   | 0   | last   | wholeT_0.5  | CBN, CBN-A           |
| 640 | No          | 9       | 9-B  | 200    | exp   | 0   | unif   | singleC     | CBN, CBN-A           |
| 641 | No          | 9       | 9-B  | 200    | exp   | 0   | unif   | wholeT_0.01 | CBN, CBN-A           |
| 642 | No          | 9       | 9-B  | 200    | exp   | 0   | unif   | wholeT_0.5  | CBN, CBN-A           |
| 643 | No          | 9       | 9-B  | 200    | exp   | Inf | last   | singleC     | CBN, CBN-A, OT, OT-A |
| 644 | No          | 9       | 9-B  | 200    | exp   | Inf | last   | wholeT_0.01 | OT, OT-A             |
| 645 | No          | 9       | 9-B  | 200    | exp   | Inf | last   | wholeT_0.5  | CBN, CBN-A, OT, OT-A |
| 646 | No          | 9       | 9-B  | 200    | exp   | Inf | unif   | singleC     | CBN, CBN-A           |
| 647 | No          | 9       | 9-B  | 200    | exp   | Inf | unif   | wholeT_0.01 | CBN, CBN-A           |
| 648 | No          | 9       | 9-B  | 200    | exp   | Inf | unif   | wholeT_0.5  | CBN, CBN-A           |
| 649 | No          | 9       | 9-B  | 200    | McF_4 | 0   | last   | singleC     | OT, OT-A             |
| 650 | No          | 9       | 9-B  | 200    | McF_4 | 0   | last   | wholeT_0.01 | OT, OT-A             |
| 651 | No          | 9       | 9-B  | 200    | McF_4 | 0   | last   | wholeT_0.5  | OT, OT-A             |
| 652 | No          | 9       | 9-B  | 200    | McF_4 | 0   | unif   | singleC     | CBN, CBN-A, OT, OT-A |
| 653 | No          | 9       | 9-B  | 200    | McF_4 | 0   | unif   | wholeT_0.01 | CBN, OT, OT-A        |
| 654 | No          | 9       | 9-B  | 200    | McF_4 | 0   | unif   | wholeT_0.5  | CBN, CBN-A, OT, OT-A |
| 655 | No          | 9       | 9-B  | 200    | McF_4 | Inf | last   | singleC     | OT, OT-A             |
| 656 | No          | 9       | 9-B  | 200    | McF_4 | Inf | last   | wholeT_0.01 | OT, OT-A             |
| 657 | No          | 9       | 9-B  | 200    | McF_4 | Inf | last   | wholeT_0.5  | OT, OT-A             |
| 658 | No          | 9       | 9-B  | 200    | McF_4 | Inf | unif   | singleC     | CBN, CBN-A, OT, OT-A |
| 659 | No          | 9       | 9-B  | 200    | McF_4 | Inf | unif   | wholeT_0.01 | CBN, CBN-A, OT, OT-A |
| 660 | No          | 9       | 9-B  | 200    | McF_4 | Inf | unif   | wholeT_0.5  | CBN, CBN-A, OT, OT-A |
| 661 | No          | 9       | 9-B  | 200    | McF_6 | 0   | last   | singleC     | OT-A                 |
| 662 | No          | 9       | 9-B  | 200    | McF_6 | 0   | last   | wholeT_0.01 | OT-A                 |
| 663 | No          | 9       | 9-B  | 200    | McF_6 | 0   | last   | wholeT_0.5  | OT-A                 |
| 664 | No          | 9       | 9-B  | 200    | McF_6 | 0   | unif   | singleC     | CBN-A, OT, OT-A      |
| 665 | No          | 9       | 9-B  | 200    | McF_6 | 0   | unif   | wholeT_0.01 | OT, OT-A             |
| 666 | No          | 9       | 9-B  | 200    | McF_6 | 0   | unif   | wholeT_0.5  | OT, OT-A             |
| 667 | No          | 9       | 9-B  | 200    | McF_6 | Inf | last   | singleC     | OT-A                 |
| 668 | No          | 9       | 9-B  | 200    | McF_6 | Inf | last   | wholeT_0.01 | OT-A                 |
| 669 | No          | 9       | 9-B  | 200    | McF_6 | Inf | last   | wholeT_0.5  | OT-A                 |
| 670 | No          | 9       | 9-B  | 200    | McF_6 | Inf | unif   | singleC     | OT, OT-A             |
| 671 | No          | 9       | 9-B  | 200    | McF_6 | Inf | unif   | wholeT_0.01 | OT, OT-A             |
| 672 | No          | 9       | 9-B  | 200    | McF_6 | Inf | unif   | wholeT_0.5  | OT, OT-A             |
| 673 | No          | 9       | 9-B  | 100    | Bozic | 0   | last   | singleC     | CBN, CBN-A           |
| 674 | No          | 9       | 9-B  | 100    | Bozic | 0   | last   | wholeT_0.01 | CBN, CBN-A           |
| 675 | No          | 9       | 9-B  | 100    | Bozic | 0   | last   | wholeT_0.5  | CBN, CBN-A           |
| 676 | No          | 9       | 9-B  | 100    | Bozic | 0   | unif   | singleC     | CBN, CBN-A           |
| 677 | No          | 9       | 9-B  | 100    | Bozic | 0   | unif   | wholeT_0.01 | CBN, CBN-A           |

Table 3: (continued)

|     | Conjunction | Drivers | Tree | S.Size | Model | sh  | S.Time | S.Type      | Best method(s)       |
|-----|-------------|---------|------|--------|-------|-----|--------|-------------|----------------------|
| 678 | No          | 9       | 9-B  | 100    | Bozic | 0   | unif   | wholeT_0.5  | CBN, CBN-A           |
| 679 | No          | 9       | 9-B  | 100    | Bozic | Inf | last   | singleC     | CBN-A, OT, OT-A      |
| 680 | No          | 9       | 9-B  | 100    | Bozic | Inf | last   | wholeT_0.01 | OT, OT-A             |
| 681 | No          | 9       | 9-B  | 100    | Bozic | Inf | last   | wholeT_0.5  | CBN, CBN-A, OT, OT-A |
| 682 | No          | 9       | 9-B  | 100    | Bozic | Inf | unif   | singleC     | CBN, CBN-A           |
| 683 | No          | 9       | 9-B  | 100    | Bozic | Inf | unif   | wholeT_0.01 | CBN, CBN-A           |
| 684 | No          | 9       | 9-B  | 100    | Bozic | Inf | unif   | wholeT_0.5  | CBN, CBN-A           |
| 685 | No          | 9       | 9-B  | 100    | exp   | 0   | last   | singleC     | CBN, CBN-A           |
| 686 | No          | 9       | 9-B  | 100    | exp   | 0   | last   | wholeT_0.01 | CBN, CBN-A           |
| 687 | No          | 9       | 9-B  | 100    | exp   | 0   | last   | wholeT_0.5  | CBN, CBN-A           |
| 688 | No          | 9       | 9-B  | 100    | exp   | 0   | unif   | singleC     | CBN, CBN-A           |
| 689 | No          | 9       | 9-B  | 100    | exp   | 0   | unif   | wholeT_0.01 | CBN, CBN-A           |
| 690 | No          | 9       | 9-B  | 100    | exp   | 0   | unif   | wholeT_0.5  | CBN, CBN-A           |
| 691 | No          | 9       | 9-B  | 100    | exp   | Inf | last   | singleC     | CBN, CBN-A           |
| 692 | No          | 9       | 9-B  | 100    | exp   | Inf | last   | wholeT_0.01 | CBN, CBN-A, OT, OT-A |
| 693 | No          | 9       | 9-B  | 100    | exp   | Inf | last   | wholeT_0.5  | CBN, CBN-A           |
| 694 | No          | 9       | 9-B  | 100    | exp   | Inf | unif   | singleC     | CBN, CBN-A           |
| 695 | No          | 9       | 9-B  | 100    | exp   | Inf | unif   | wholeT_0.01 | CBN, CBN-A           |
| 696 | No          | 9       | 9-B  | 100    | exp   | Inf | unif   | wholeT_0.5  | CBN, CBN-A           |
| 697 | No          | 9       | 9-B  | 100    | McF_4 | 0   | last   | singleC     | OT, OT-A             |
| 698 | No          | 9       | 9-B  | 100    | McF_4 | 0   | last   | wholeT_0.01 | OT, OT-A             |
| 699 | No          | 9       | 9-B  | 100    | McF_4 | 0   | last   | wholeT_0.5  | OT, OT-A             |
| 700 | No          | 9       | 9-B  | 100    | McF_4 | 0   | unif   | singleC     | CBN, CBN-A, OT, OT-A |
| 701 | No          | 9       | 9-B  | 100    | McF_4 | 0   | unif   | wholeT_0.01 | CBN, CBN-A, OT, OT-A |
| 702 | No          | 9       | 9-B  | 100    | McF_4 | 0   | unif   | wholeT_0.5  | CBN, CBN-A           |
| 703 | No          | 9       | 9-B  | 100    | McF_4 | Inf | last   | singleC     | OT, OT-A             |
| 704 | No          | 9       | 9-B  | 100    | McF_4 | Inf | last   | wholeT_0.01 | OT, OT-A             |
| 705 | No          | 9       | 9-B  | 100    | McF_4 | Inf | last   | wholeT_0.5  | OT, OT-A             |
| 706 | No          | 9       | 9-B  | 100    | McF_4 | Inf | unif   | singleC     | CBN, CBN-A, OT, OT-A |
| 707 | No          | 9       | 9-B  | 100    | McF_4 | Inf | unif   | wholeT_0.01 | CBN, CBN-A, OT, OT-A |
| 708 | No          | 9       | 9-B  | 100    | McF_4 | Inf | unif   | wholeT_0.5  | CBN, CBN-A           |
| 709 | No          | 9       | 9-B  | 100    | McF_6 | 0   | last   | singleC     | OT-A                 |
| 710 | No          | 9       | 9-B  | 100    | McF_6 | 0   | last   | wholeT_0.01 | OT-A                 |
| 711 | No          | 9       | 9-B  | 100    | McF_6 | 0   | last   | wholeT_0.5  | OT-A                 |
| 712 | No          | 9       | 9-B  | 100    | McF_6 | 0   | unif   | singleC     | OT, OT-A             |
| 713 | No          | 9       | 9-B  | 100    | McF_6 | 0   | unif   | wholeT_0.01 | CBN, OT, OT-A        |
| 714 | No          | 9       | 9-B  | 100    | McF_6 | 0   | unif   | wholeT_0.5  | OT, OT-A             |
| 715 | No          | 9       | 9-B  | 100    | McF_6 | Inf | last   | singleC     | OT-A                 |
| 716 | No          | 9       | 9-B  | 100    | McF_6 | Inf | last   | wholeT_0.01 | OT-A                 |
| 717 | No          | 9       | 9-B  | 100    | McF_6 | Inf | last   | wholeT_0.5  | OT-A                 |

Table 3: (continued)

|     | Conjunction | Drivers | Tree | S.Size | Model | sh  | S.Time | S.Type      | Best method(s)              |
|-----|-------------|---------|------|--------|-------|-----|--------|-------------|-----------------------------|
| 718 | No          | 9       | 9-B  | 100    | McF_6 | Inf | unif   | singleC     | OT, OT-A                    |
| 719 | No          | 9       | 9-B  | 100    | McF_6 | Inf | unif   | wholeT_0.01 | CBN, OT, OT-A               |
| 720 | No          | 9       | 9-B  | 100    | McF_6 | Inf | unif   | wholeT_0.5  | OT, OT-A                    |
| 721 | No          | 7       | 7-B  | 1000   | Bozic | 0   | last   | singleC     | OT-A                        |
| 722 | No          | 7       | 7-B  | 1000   | Bozic | 0   | last   | wholeT_0.01 | OT-A                        |
| 723 | No          | 7       | 7-B  | 1000   | Bozic | 0   | last   | wholeT_0.5  | OT-A                        |
| 724 | No          | 7       | 7-B  | 1000   | Bozic | 0   | unif   | singleC     | CBN, CBN-A, OT, OT-A        |
| 725 | No          | 7       | 7-B  | 1000   | Bozic | 0   | unif   | wholeT_0.01 | CBN, CBN-A, DiP-A, OT, OT-A |
| 726 | No          | 7       | 7-B  | 1000   | Bozic | 0   | unif   | wholeT_0.5  | CBN, CBN-A, OT, OT-A        |
| 727 | No          | 7       | 7-B  | 1000   | Bozic | Inf | last   | singleC     | DiP-A, OT-A                 |
| 728 | No          | 7       | 7-B  | 1000   | Bozic | Inf | last   | wholeT_0.01 | DiP-A, OT-A                 |
| 729 | No          | 7       | 7-B  | 1000   | Bozic | Inf | last   | wholeT_0.5  | DiP-A, OT-A                 |
| 730 | No          | 7       | 7-B  | 1000   | Bozic | Inf | unif   | singleC     | OT, OT-A                    |
| 731 | No          | 7       | 7-B  | 1000   | Bozic | Inf | unif   | wholeT_0.01 | CBN, CBN-A, OT, OT-A        |
| 732 | No          | 7       | 7-B  | 1000   | Bozic | Inf | unif   | wholeT_0.5  | OT, OT-A                    |
| 733 | No          | 7       | 7-B  | 1000   | exp   | 0   | last   | singleC     | CBN-A                       |
| 734 | No          | 7       | 7-B  | 1000   | exp   | 0   | last   | wholeT_0.01 | CBN, OT-A                   |
| 735 | No          | 7       | 7-B  | 1000   | exp   | 0   | last   | wholeT_0.5  | CBN-A                       |
| 736 | No          | 7       | 7-B  | 1000   | exp   | 0   | unif   | singleC     | CBN, CBN-A                  |
| 737 | No          | 7       | 7-B  | 1000   | exp   | 0   | unif   | wholeT_0.01 | CBN, CBN-A, OT-A            |
| 738 | No          | 7       | 7-B  | 1000   | exp   | 0   | unif   | wholeT_0.5  | CBN, CBN-A                  |
| 739 | No          | 7       | 7-B  | 1000   | exp   | Inf | last   | singleC     | OT-A                        |
| 740 | No          | 7       | 7-B  | 1000   | exp   | Inf | last   | wholeT_0.01 | OT-A                        |
| 741 | No          | 7       | 7-B  | 1000   | exp   | Inf | last   | wholeT_0.5  | OT-A                        |
| 742 | No          | 7       | 7-B  | 1000   | exp   | Inf | unif   | singleC     | CBN, CBN-A, OT, OT-A        |
| 743 | No          | 7       | 7-B  | 1000   | exp   | Inf | unif   | wholeT_0.01 | CBN-A, OT, OT-A             |
| 744 | No          | 7       | 7-B  | 1000   | exp   | Inf | unif   | wholeT_0.5  | CBN, CBN-A                  |
| 745 | No          | 7       | 7-B  | 1000   | McF_4 | 0   | last   | singleC     | DiP-A, OT-A                 |
| 746 | No          | 7       | 7-B  | 1000   | McF_4 | 0   | last   | wholeT_0.01 | DiP-A, OT-A                 |
| 747 | No          | 7       | 7-B  | 1000   | McF_4 | 0   | last   | wholeT_0.5  | DiP-A, OT-A                 |
| 748 | No          | 7       | 7-B  | 1000   | McF_4 | 0   | unif   | singleC     | DiP-A, OT, OT-A             |
| 749 | No          | 7       | 7-B  | 1000   | McF_4 | 0   | unif   | wholeT_0.01 | DiP-A, OT, OT-A             |
| 750 | No          | 7       | 7-B  | 1000   | McF_4 | 0   | unif   | wholeT_0.5  | DiP-A, OT, OT-A             |
| 751 | No          | 7       | 7-B  | 1000   | McF_4 | Inf | last   | singleC     | DiP-A, OT-A                 |
| 752 | No          | 7       | 7-B  | 1000   | McF_4 | Inf | last   | wholeT_0.01 | DiP-A, OT-A                 |
| 753 | No          | 7       | 7-B  | 1000   | McF_4 | Inf | last   | wholeT_0.5  | DiP-A, OT-A                 |
| 754 | No          | 7       | 7-B  | 1000   | McF_4 | Inf | unif   | singleC     | OT, OT-A                    |
| 755 | No          | 7       | 7-B  | 1000   | McF_4 | Inf | unif   | wholeT_0.01 | OT, OT-A                    |
| 756 | No          | 7       | 7-B  | 1000   | McF_4 | Inf | unif   | wholeT_0.5  | OT, OT-A                    |
| 757 | No          | 7       | 7-B  | 1000   | McF_6 | 0   | last   | singleC     | DiP-A, OT-A                 |

Table 3: (continued)

|     | Conjunction | Drivers | Tree | S.Size | Model | sh  | S.Time | S.Type      | Best method(s)       |
|-----|-------------|---------|------|--------|-------|-----|--------|-------------|----------------------|
| 758 | No          | 7       | 7-B  | 1000   | McF_6 | 0   | last   | wholeT_0.01 | DiP-A, OT-A          |
| 759 | No          | 7       | 7-B  | 1000   | McF_6 | 0   | last   | wholeT_0.5  | DiP-A, OT-A          |
| 760 | No          | 7       | 7-B  | 1000   | McF_6 | 0   | unif   | singleC     | DiP, DiP-A, OT, OT-A |
| 761 | No          | 7       | 7-B  | 1000   | McF_6 | 0   | unif   | wholeT_0.01 | DiP, DiP-A, OT, OT-A |
| 762 | No          | 7       | 7-B  | 1000   | McF_6 | 0   | unif   | wholeT_0.5  | DiP, DiP-A, OT, OT-A |
| 763 | No          | 7       | 7-B  | 1000   | McF_6 | Inf | last   | singleC     | DiP-A, OT-A          |
| 764 | No          | 7       | 7-B  | 1000   | McF_6 | Inf | last   | wholeT_0.01 | DiP-A, OT-A          |
| 765 | No          | 7       | 7-B  | 1000   | McF_6 | Inf | last   | wholeT_0.5  | DiP-A, OT-A          |
| 766 | No          | 7       | 7-B  | 1000   | McF_6 | Inf | unif   | singleC     | DiP-A, OT, OT-A      |
| 767 | No          | 7       | 7-B  | 1000   | McF_6 | Inf | unif   | wholeT_0.01 | DiP-A, OT, OT-A      |
| 768 | No          | 7       | 7-B  | 1000   | McF_6 | Inf | unif   | wholeT_0.5  | DiP-A, OT, OT-A      |
| 769 | No          | 7       | 7-B  | 200    | Bozic | 0   | last   | singleC     | CBN, OT-A            |
| 770 | No          | 7       | 7-B  | 200    | Bozic | 0   | last   | wholeT_0.01 | OT-A                 |
| 771 | No          | 7       | 7-B  | 200    | Bozic | 0   | last   | wholeT_0.5  | CBN, CBN-A, OT-A     |
| 772 | No          | 7       | 7-B  | 200    | Bozic | 0   | unif   | singleC     | CBN, CBN-A           |
| 773 | No          | 7       | 7-B  | 200    | Bozic | 0   | unif   | wholeT_0.01 | CBN, CBN-A, OT, OT-A |
| 774 | No          | 7       | 7-B  | 200    | Bozic | 0   | unif   | wholeT_0.5  | CBN, CBN-A           |
| 775 | No          | 7       | 7-B  | 200    | Bozic | Inf | last   | singleC     | OT-A                 |
| 776 | No          | 7       | 7-B  | 200    | Bozic | Inf | last   | wholeT_0.01 | OT-A                 |
| 777 | No          | 7       | 7-B  | 200    | Bozic | Inf | last   | wholeT_0.5  | OT-A                 |
| 778 | No          | 7       | 7-B  | 200    | Bozic | Inf | unif   | singleC     | CBN, CBN-A, OT, OT-A |
| 779 | No          | 7       | 7-B  | 200    | Bozic | Inf | unif   | wholeT_0.01 | CBN, CBN-A, OT, OT-A |
| 780 | No          | 7       | 7-B  | 200    | Bozic | Inf | unif   | wholeT_0.5  | CBN, CBN-A           |
| 781 | No          | 7       | 7-B  | 200    | exp   | 0   | last   | singleC     | CBN-A                |
| 782 | No          | 7       | 7-B  | 200    | exp   | 0   | last   | wholeT_0.01 | CBN, CBN-A, OT-A     |
| 783 | No          | 7       | 7-B  | 200    | exp   | 0   | last   | wholeT_0.5  | CBN, CBN-A           |
| 784 | No          | 7       | 7-B  | 200    | exp   | 0   | unif   | singleC     | CBN, CBN-A           |
| 785 | No          | 7       | 7-B  | 200    | exp   | 0   | unif   | wholeT_0.01 | CBN, CBN-A           |
| 786 | No          | 7       | 7-B  | 200    | exp   | 0   | unif   | wholeT_0.5  | CBN                  |
| 787 | No          | 7       | 7-B  | 200    | exp   | Inf | last   | singleC     | OT-A                 |
| 788 | No          | 7       | 7-B  | 200    | exp   | Inf | last   | wholeT_0.01 | OT-A                 |
| 789 | No          | 7       | 7-B  | 200    | exp   | Inf | last   | wholeT_0.5  | OT-A                 |
| 790 | No          | 7       | 7-B  | 200    | exp   | Inf | unif   | singleC     | CBN, CBN-A           |
| 791 | No          | 7       | 7-B  | 200    | exp   | Inf | unif   | wholeT_0.01 | CBN, CBN-A           |
| 792 | No          | 7       | 7-B  | 200    | exp   | Inf | unif   | wholeT_0.5  | CBN, CBN-A           |
| 793 | No          | 7       | 7-B  | 200    | McF_4 | 0   | last   | singleC     | OT-A                 |
| 794 | No          | 7       | 7-B  | 200    | McF_4 | 0   | last   | wholeT_0.01 | OT-A                 |
| 795 | No          | 7       | 7-B  | 200    | McF_4 | 0   | last   | wholeT_0.5  | OT-A                 |
| 796 | No          | 7       | 7-B  | 200    | McF_4 | 0   | unif   | singleC     | OT, OT-A             |
| 797 | No          | 7       | 7-B  | 200    | McF_4 | 0   | unif   | wholeT_0.01 | OT, OT-A             |

Table 3: (continued)

|     | Conjunction | Drivers | Tree | S.Size | Model | sh  | S.Time | S.Type      | Best method(s)       |
|-----|-------------|---------|------|--------|-------|-----|--------|-------------|----------------------|
| 798 | No          | 7       | 7-B  | 200    | McF_4 | 0   | unif   | wholeT_0.5  | OT, OT-A             |
| 799 | No          | 7       | 7-B  | 200    | McF_4 | Inf | last   | singleC     | OT-A                 |
| 800 | No          | 7       | 7-B  | 200    | McF_4 | Inf | last   | wholeT_0.01 | OT-A                 |
| 801 | No          | 7       | 7-B  | 200    | McF_4 | Inf | last   | wholeT_0.5  | OT-A                 |
| 802 | No          | 7       | 7-B  | 200    | McF_4 | Inf | unif   | singleC     | OT, OT-A             |
| 803 | No          | 7       | 7-B  | 200    | McF_4 | Inf | unif   | wholeT_0.01 | OT, OT-A             |
| 804 | No          | 7       | 7-B  | 200    | McF_4 | Inf | unif   | wholeT_0.5  | OT, OT-A             |
| 805 | No          | 7       | 7-B  | 200    | McF_6 | 0   | last   | singleC     | OT-A                 |
| 806 | No          | 7       | 7-B  | 200    | McF_6 | 0   | last   | wholeT_0.01 | OT-A                 |
| 807 | No          | 7       | 7-B  | 200    | McF_6 | 0   | last   | wholeT_0.5  | OT-A                 |
| 808 | No          | 7       | 7-B  | 200    | McF_6 | 0   | unif   | singleC     | OT, OT-A             |
| 809 | No          | 7       | 7-B  | 200    | McF_6 | 0   | unif   | wholeT_0.01 | OT, OT-A             |
| 810 | No          | 7       | 7-B  | 200    | McF_6 | 0   | unif   | wholeT_0.5  | OT, OT-A             |
| 811 | No          | 7       | 7-B  | 200    | McF_6 | Inf | last   | singleC     | OT-A                 |
| 812 | No          | 7       | 7-B  | 200    | McF_6 | Inf | last   | wholeT_0.01 | OT-A                 |
| 813 | No          | 7       | 7-B  | 200    | McF_6 | Inf | last   | wholeT_0.5  | OT-A                 |
| 814 | No          | 7       | 7-B  | 200    | McF_6 | Inf | unif   | singleC     | OT, OT-A             |
| 815 | No          | 7       | 7-B  | 200    | McF_6 | Inf | unif   | wholeT_0.01 | OT, OT-A             |
| 816 | No          | 7       | 7-B  | 200    | McF_6 | Inf | unif   | wholeT_0.5  | OT, OT-A             |
| 817 | No          | 7       | 7-B  | 100    | Bozic | 0   | last   | singleC     | CBN, CBN-A, OT-A     |
| 818 | No          | 7       | 7-B  | 100    | Bozic | 0   | last   | wholeT_0.01 | OT-A                 |
| 819 | No          | 7       | 7-B  | 100    | Bozic | 0   | last   | wholeT_0.5  | CBN, CBN-A, OT-A     |
| 820 | No          | 7       | 7-B  | 100    | Bozic | 0   | unif   | singleC     | CBN, CBN-A           |
| 821 | No          | 7       | 7-B  | 100    | Bozic | 0   | unif   | wholeT_0.01 | CBN, CBN-A, OT, OT-A |
| 822 | No          | 7       | 7-B  | 100    | Bozic | 0   | unif   | wholeT_0.5  | CBN, CBN-A           |
| 823 | No          | 7       | 7-B  | 100    | Bozic | Inf | last   | singleC     | OT-A                 |
| 824 | No          | 7       | 7-B  | 100    | Bozic | Inf | last   | wholeT_0.01 | OT-A                 |
| 825 | No          | 7       | 7-B  | 100    | Bozic | Inf | last   | wholeT_0.5  | OT-A                 |
| 826 | No          | 7       | 7-B  | 100    | Bozic | Inf | unif   | singleC     | CBN, CBN-A           |
| 827 | No          | 7       | 7-B  | 100    | Bozic | Inf | unif   | wholeT_0.01 | CBN, CBN-A           |
| 828 | No          | 7       | 7-B  | 100    | Bozic | Inf | unif   | wholeT_0.5  | CBN, CBN-A           |
| 829 | No          | 7       | 7-B  | 100    | exp   | 0   | last   | singleC     | CBN-A                |
| 830 | No          | 7       | 7-B  | 100    | exp   | 0   | last   | wholeT_0.01 | CBN, CBN-A           |
| 831 | No          | 7       | 7-B  | 100    | exp   | 0   | last   | wholeT_0.5  | CBN, CBN-A           |
| 832 | No          | 7       | 7-B  | 100    | exp   | 0   | unif   | singleC     | CBN, CBN-A           |
| 833 | No          | 7       | 7-B  | 100    | exp   | 0   | unif   | wholeT_0.01 | CBN, CBN-A           |
| 834 | No          | 7       | 7-B  | 100    | exp   | 0   | unif   | wholeT_0.5  | CBN, CBN-A           |
| 835 | No          | 7       | 7-B  | 100    | exp   | Inf | last   | singleC     | OT-A                 |
| 836 | No          | 7       | 7-B  | 100    | exp   | Inf | last   | wholeT_0.01 | OT-A                 |
| 837 | No          | 7       | 7-B  | 100    | exp   | Inf | last   | wholeT_0.5  | CBN, OT-A            |

Table 3: (continued)

|     | Conjunction | Drivers | Tree | S.Size | Model | sh  | S.Time | S.Type      | Best method(s) |
|-----|-------------|---------|------|--------|-------|-----|--------|-------------|----------------|
| 838 | No          | 7       | 7-B  | 100    | exp   | Inf | unif   | singleC     | CBN, CBN-A     |
| 839 | No          | 7       | 7-B  | 100    | exp   | Inf | unif   | wholeT_0.01 | CBN, CBN-A     |
| 840 | No          | 7       | 7-B  | 100    | exp   | Inf | unif   | wholeT_0.5  | CBN, CBN-A     |
| 841 | No          | 7       | 7-B  | 100    | McF_4 | 0   | last   | singleC     | OT-A           |
| 842 | No          | 7       | 7-B  | 100    | McF_4 | 0   | last   | wholeT_0.01 | OT-A           |
| 843 | No          | 7       | 7-B  | 100    | McF_4 | 0   | last   | wholeT_0.5  | OT-A           |
| 844 | No          | 7       | 7-B  | 100    | McF_4 | 0   | unif   | singleC     | OT, OT-A       |
| 845 | No          | 7       | 7-B  | 100    | McF_4 | 0   | unif   | wholeT_0.01 | OT, OT-A       |
| 846 | No          | 7       | 7-B  | 100    | McF_4 | 0   | unif   | wholeT_0.5  | OT, OT-A       |
| 847 | No          | 7       | 7-B  | 100    | McF_4 | Inf | last   | singleC     | OT-A           |
| 848 | No          | 7       | 7-B  | 100    | McF_4 | Inf | last   | wholeT_0.01 | OT-A           |
| 849 | No          | 7       | 7-B  | 100    | McF_4 | Inf | last   | wholeT_0.5  | OT-A           |
| 850 | No          | 7       | 7-B  | 100    | McF_4 | Inf | unif   | singleC     | OT, OT-A       |
| 851 | No          | 7       | 7-B  | 100    | McF_4 | Inf | unif   | wholeT_0.01 | OT, OT-A       |
| 852 | No          | 7       | 7-B  | 100    | McF_4 | Inf | unif   | wholeT_0.5  | OT, OT-A       |
| 853 | No          | 7       | 7-B  | 100    | McF_6 | 0   | last   | singleC     | OT-A           |
| 854 | No          | 7       | 7-B  | 100    | McF_6 | 0   | last   | wholeT_0.01 | OT-A           |
| 855 | No          | 7       | 7-B  | 100    | McF_6 | 0   | last   | wholeT_0.5  | OT-A           |
| 856 | No          | 7       | 7-B  | 100    | McF_6 | 0   | unif   | singleC     | OT, OT-A       |
| 857 | No          | 7       | 7-B  | 100    | McF_6 | 0   | unif   | wholeT_0.01 | OT, OT-A       |
| 858 | No          | 7       | 7-B  | 100    | McF_6 | 0   | unif   | wholeT_0.5  | OT, OT-A       |
| 859 | No          | 7       | 7-B  | 100    | McF_6 | Inf | last   | singleC     | OT-A           |
| 860 | No          | 7       | 7-B  | 100    | McF_6 | Inf | last   | wholeT_0.01 | OT-A           |
| 861 | No          | 7       | 7-B  | 100    | McF_6 | Inf | last   | wholeT_0.5  | OT-A           |
| 862 | No          | 7       | 7-B  | 100    | McF_6 | Inf | unif   | singleC     | OT-A           |
| 863 | No          | 7       | 7-B  | 100    | McF_6 | Inf | unif   | wholeT_0.01 | OT-A           |
| 864 | No          | 7       | 7-B  | 100    | McF_6 | Inf | unif   | wholeT_0.5  | OT, OT-A       |

## 2.4 Confidence sets (MCB-2), FPF, Drivers Known

Table 4: Confidence sets (method MCB-2) when Drivers are Known for measure FPF.

|    | Conjunction | Drivers | Tree | S.Size | Model | sh  | S.Time | S.Type      | Best method(s)       |
|----|-------------|---------|------|--------|-------|-----|--------|-------------|----------------------|
| 1  | Yes         | 11      | 11-A | 1000   | Bozic | 0   | last   | singleC     | DiP-A, OT, OT-A      |
| 2  | Yes         | 11      | 11-A | 1000   | Bozic | 0   | last   | wholeT_0.01 | DiP, DiP-A           |
| 3  | Yes         | 11      | 11-A | 1000   | Bozic | 0   | last   | wholeT_0.5  | DiP, DiP-A, OT, OT-A |
| 4  | Yes         | 11      | 11-A | 1000   | Bozic | 0   | unif   | singleC     | DiP, DiP-A           |
| 5  | Yes         | 11      | 11-A | 1000   | Bozic | 0   | unif   | wholeT_0.01 | DiP-A                |
| 6  | Yes         | 11      | 11-A | 1000   | Bozic | 0   | unif   | wholeT_0.5  | DiP, DiP-A           |
| 7  | Yes         | 11      | 11-A | 1000   | Bozic | Inf | last   | singleC     | OT, OT-A             |
| 8  | Yes         | 11      | 11-A | 1000   | Bozic | Inf | last   | wholeT_0.01 | DiP, DiP-A           |
| 9  | Yes         | 11      | 11-A | 1000   | Bozic | Inf | last   | wholeT_0.5  | OT, OT-A             |
| 10 | Yes         | 11      | 11-A | 1000   | Bozic | Inf | unif   | singleC     | DiP, DiP-A, OT, OT-A |
| 11 | Yes         | 11      | 11-A | 1000   | Bozic | Inf | unif   | wholeT_0.01 | DiP, DiP-A, OT, OT-A |
| 12 | Yes         | 11      | 11-A | 1000   | Bozic | Inf | unif   | wholeT_0.5  | DiP, DiP-A, OT, OT-A |
| 13 | Yes         | 11      | 11-A | 1000   | exp   | 0   | last   | singleC     | DiP, DiP-A, OT, OT-A |
| 14 | Yes         | 11      | 11-A | 1000   | exp   | 0   | last   | wholeT_0.01 | DiP-A, OT, OT-A      |
| 15 | Yes         | 11      | 11-A | 1000   | exp   | 0   | last   | wholeT_0.5  | DiP, DiP-A, OT, OT-A |
| 16 | Yes         | 11      | 11-A | 1000   | exp   | 0   | unif   | singleC     | DiP, DiP-A, OT, OT-A |
| 17 | Yes         | 11      | 11-A | 1000   | exp   | 0   | unif   | wholeT_0.01 | DiP, DiP-A           |
| 18 | Yes         | 11      | 11-A | 1000   | exp   | 0   | unif   | wholeT_0.5  | DiP, DiP-A, OT, OT-A |
| 19 | Yes         | 11      | 11-A | 1000   | exp   | Inf | last   | singleC     | DiP-A, OT, OT-A      |
| 20 | Yes         | 11      | 11-A | 1000   | exp   | Inf | last   | wholeT_0.01 | OT, OT-A             |
| 21 | Yes         | 11      | 11-A | 1000   | exp   | Inf | last   | wholeT_0.5  | DiP, DiP-A, OT, OT-A |
| 22 | Yes         | 11      | 11-A | 1000   | exp   | Inf | unif   | singleC     | DiP, DiP-A, OT, OT-A |
| 23 | Yes         | 11      | 11-A | 1000   | exp   | Inf | unif   | wholeT_0.01 | DiP, DiP-A, OT, OT-A |
| 24 | Yes         | 11      | 11-A | 1000   | exp   | Inf | unif   | wholeT_0.5  | DiP-A, OT, OT-A      |
| 25 | Yes         | 11      | 11-A | 1000   | McF_4 | 0   | last   | singleC     | DiP-A, OT, OT-A      |
| 26 | Yes         | 11      | 11-A | 1000   | McF_4 | 0   | last   | wholeT_0.01 | DiP-A, OT, OT-A      |
| 27 | Yes         | 11      | 11-A | 1000   | McF_4 | 0   | last   | wholeT_0.5  | DiP-A, OT, OT-A      |
| 28 | Yes         | 11      | 11-A | 1000   | McF_4 | 0   | unif   | singleC     | DiP, DiP-A, OT, OT-A |
| 29 | Yes         | 11      | 11-A | 1000   | McF_4 | 0   | unif   | wholeT_0.01 | DiP, DiP-A           |
| 30 | Yes         | 11      | 11-A | 1000   | McF_4 | 0   | unif   | wholeT_0.5  | DiP, DiP-A           |
| 31 | Yes         | 11      | 11-A | 1000   | McF_4 | Inf | last   | singleC     | OT, OT-A             |
| 32 | Yes         | 11      | 11-A | 1000   | McF_4 | Inf | last   | wholeT_0.01 | OT, OT-A             |
| 33 | Yes         | 11      | 11-A | 1000   | McF_4 | Inf | last   | wholeT_0.5  | DiP-A, OT, OT-A      |
| 34 | Yes         | 11      | 11-A | 1000   | McF_4 | Inf | unif   | singleC     | DiP, DiP-A, OT, OT-A |
| 35 | Yes         | 11      | 11-A | 1000   | McF_4 | Inf | unif   | wholeT_0.01 | DiP, DiP-A, OT, OT-A |
| 36 | Yes         | 11      | 11-A | 1000   | McF_4 | Inf | unif   | wholeT_0.5  | DiP, DiP-A, OT, OT-A |
| 37 | Yes         | 11      | 11-A | 1000   | McF_6 | 0   | last   | singleC     | DiP, OT              |

Table 4: (continued)

|    | Conjunction | Drivers | Tree | S.Size | Model | sh  | S.Time | S.Type      | Best method(s)       |
|----|-------------|---------|------|--------|-------|-----|--------|-------------|----------------------|
| 38 | Yes         | 11      | 11-A | 1000   | McF_6 | 0   | last   | wholeT_0.01 | DiP, OT              |
| 39 | Yes         | 11      | 11-A | 1000   | McF_6 | 0   | last   | wholeT_0.5  | DiP, OT              |
| 40 | Yes         | 11      | 11-A | 1000   | McF_6 | 0   | unif   | singleC     | DiP, DiP-A, OT, OT-A |
| 41 | Yes         | 11      | 11-A | 1000   | McF_6 | 0   | unif   | wholeT_0.01 | DiP, DiP-A, OT, OT-A |
| 42 | Yes         | 11      | 11-A | 1000   | McF_6 | 0   | unif   | wholeT_0.5  | DiP, DiP-A           |
| 43 | Yes         | 11      | 11-A | 1000   | McF_6 | Inf | last   | singleC     | DiP, OT              |
| 44 | Yes         | 11      | 11-A | 1000   | McF_6 | Inf | last   | wholeT_0.01 | DiP, OT              |
| 45 | Yes         | 11      | 11-A | 1000   | McF_6 | Inf | last   | wholeT_0.5  | DiP, OT              |
| 46 | Yes         | 11      | 11-A | 1000   | McF_6 | Inf | unif   | singleC     | DiP, DiP-A           |
| 47 | Yes         | 11      | 11-A | 1000   | McF_6 | Inf | unif   | wholeT_0.01 | DiP, DiP-A           |
| 48 | Yes         | 11      | 11-A | 1000   | McF_6 | Inf | unif   | wholeT_0.5  | DiP, DiP-A           |
| 49 | Yes         | 11      | 11-A | 200    | Bozic | 0   | last   | singleC     | DiP, DiP-A, OT, OT-A |
| 50 | Yes         | 11      | 11-A | 200    | Bozic | 0   | last   | wholeT_0.01 | DiP                  |
| 51 | Yes         | 11      | 11-A | 200    | Bozic | 0   | last   | wholeT_0.5  | DiP, DiP-A, OT, OT-A |
| 52 | Yes         | 11      | 11-A | 200    | Bozic | 0   | unif   | singleC     | DiP, DiP-A, OT, OT-A |
| 53 | Yes         | 11      | 11-A | 200    | Bozic | 0   | unif   | wholeT_0.01 | DiP, DiP-A           |
| 54 | Yes         | 11      | 11-A | 200    | Bozic | 0   | unif   | wholeT_0.5  | DiP, DiP-A, OT, OT-A |
| 55 | Yes         | 11      | 11-A | 200    | Bozic | Inf | last   | singleC     | DiP, DiP-A, OT, OT-A |
| 56 | Yes         | 11      | 11-A | 200    | Bozic | Inf | last   | wholeT_0.01 | DiP, OT, OT-A        |
| 57 | Yes         | 11      | 11-A | 200    | Bozic | Inf | last   | wholeT_0.5  | DiP, DiP-A, OT, OT-A |
| 58 | Yes         | 11      | 11-A | 200    | Bozic | Inf | unif   | singleC     | DiP, DiP-A           |
| 59 | Yes         | 11      | 11-A | 200    | Bozic | Inf | unif   | wholeT_0.01 | DiP, DiP-A, OT, OT-A |
| 60 | Yes         | 11      | 11-A | 200    | Bozic | Inf | unif   | wholeT_0.5  | DiP, DiP-A           |
| 61 | Yes         | 11      | 11-A | 200    | exp   | 0   | last   | singleC     | DiP, DiP-A, OT, OT-A |
| 62 | Yes         | 11      | 11-A | 200    | exp   | 0   | last   | wholeT_0.01 | DiP, DiP-A, OT, OT-A |
| 63 | Yes         | 11      | 11-A | 200    | exp   | 0   | last   | wholeT_0.5  | DiP, DiP-A, OT, OT-A |
| 64 | Yes         | 11      | 11-A | 200    | exp   | 0   | unif   | singleC     | DiP, DiP-A, OT, OT-A |
| 65 | Yes         | 11      | 11-A | 200    | exp   | 0   | unif   | wholeT_0.01 | DiP, DiP-A, OT, OT-A |
| 66 | Yes         | 11      | 11-A | 200    | exp   | 0   | unif   | wholeT_0.5  | DiP, DiP-A, OT, OT-A |
| 67 | Yes         | 11      | 11-A | 200    | exp   | Inf | last   | singleC     | DiP, DiP-A, OT, OT-A |
| 68 | Yes         | 11      | 11-A | 200    | exp   | Inf | last   | wholeT_0.01 | DiP, DiP-A, OT, OT-A |
| 69 | Yes         | 11      | 11-A | 200    | exp   | Inf | last   | wholeT_0.5  | DiP, DiP-A, OT, OT-A |
| 70 | Yes         | 11      | 11-A | 200    | exp   | Inf | unif   | singleC     | DiP, DiP-A, OT, OT-A |
| 71 | Yes         | 11      | 11-A | 200    | exp   | Inf | unif   | wholeT_0.01 | DiP, DiP-A           |
| 72 | Yes         | 11      | 11-A | 200    | exp   | Inf | unif   | wholeT_0.5  | DiP, DiP-A           |
| 73 | Yes         | 11      | 11-A | 200    | McF_4 | 0   | last   | singleC     | DiP, DiP-A, OT, OT-A |
| 74 | Yes         | 11      | 11-A | 200    | McF_4 | 0   | last   | wholeT_0.01 | DiP, DiP-A, OT, OT-A |
| 75 | Yes         | 11      | 11-A | 200    | McF_4 | 0   | last   | wholeT_0.5  | DiP, DiP-A, OT, OT-A |
| 76 | Yes         | 11      | 11-A | 200    | McF_4 | 0   | unif   | singleC     | DiP, DiP-A, OT, OT-A |
| 77 | Yes         | 11      | 11-A | 200    | McF_4 | 0   | unif   | wholeT_0.01 | DiP, DiP-A           |



Table 4: (continued)

|     | Conjunction | Drivers | Tree | S.Size | Model | sh  | S.Time | S.Type      | Best method(s)       |
|-----|-------------|---------|------|--------|-------|-----|--------|-------------|----------------------|
| 78  | Yes         | 11      | 11-A | 200    | McF_4 | 0   | unif   | wholeT_0.5  | DiP, DiP-A, OT, OT-A |
| 79  | Yes         | 11      | 11-A | 200    | McF_4 | Inf | last   | singleC     | DiP, DiP-A, OT, OT-A |
| 80  | Yes         | 11      | 11-A | 200    | McF_4 | Inf | last   | wholeT_0.01 | OT, OT-A             |
| 81  | Yes         | 11      | 11-A | 200    | McF_4 | Inf | last   | wholeT_0.5  | DiP, DiP-A, OT, OT-A |
| 82  | Yes         | 11      | 11-A | 200    | McF_4 | Inf | unif   | singleC     | DiP, DiP-A, OT, OT-A |
| 83  | Yes         | 11      | 11-A | 200    | McF_4 | Inf | unif   | wholeT_0.01 | DiP, DiP-A, OT, OT-A |
| 84  | Yes         | 11      | 11-A | 200    | McF_4 | Inf | unif   | wholeT_0.5  | DiP, DiP-A, OT, OT-A |
| 85  | Yes         | 11      | 11-A | 200    | McF_6 | 0   | last   | singleC     | DiP, OT              |
| 86  | Yes         | 11      | 11-A | 200    | McF_6 | 0   | last   | wholeT_0.01 | DiP, OT              |
| 87  | Yes         | 11      | 11-A | 200    | McF_6 | 0   | last   | wholeT_0.5  | DiP, OT              |
| 88  | Yes         | 11      | 11-A | 200    | McF_6 | 0   | unif   | singleC     | DiP, DiP-A, OT, OT-A |
| 89  | Yes         | 11      | 11-A | 200    | McF_6 | 0   | unif   | wholeT_0.01 | DiP, DiP-A, OT, OT-A |
| 90  | Yes         | 11      | 11-A | 200    | McF_6 | 0   | unif   | wholeT_0.5  | DiP, OT, OT-A        |
| 91  | Yes         | 11      | 11-A | 200    | McF_6 | Inf | last   | singleC     | DiP, OT              |
| 92  | Yes         | 11      | 11-A | 200    | McF_6 | Inf | last   | wholeT_0.01 | DiP, OT              |
| 93  | Yes         | 11      | 11-A | 200    | McF_6 | Inf | last   | wholeT_0.5  | DiP, OT              |
| 94  | Yes         | 11      | 11-A | 200    | McF_6 | Inf | unif   | singleC     | OT, OT-A             |
| 95  | Yes         | 11      | 11-A | 200    | McF_6 | Inf | unif   | wholeT_0.01 | OT, OT-A             |
| 96  | Yes         | 11      | 11-A | 200    | McF_6 | Inf | unif   | wholeT_0.5  | OT, OT-A             |
| 97  | Yes         | 11      | 11-A | 100    | Bozic | 0   | last   | singleC     | DiP, DiP-A, OT, OT-A |
| 98  | Yes         | 11      | 11-A | 100    | Bozic | 0   | last   | wholeT_0.01 | DiP, DiP-A           |
| 99  | Yes         | 11      | 11-A | 100    | Bozic | 0   | last   | wholeT_0.5  | DiP, DiP-A, OT, OT-A |
| 100 | Yes         | 11      | 11-A | 100    | Bozic | 0   | unif   | singleC     | DiP, DiP-A, OT, OT-A |
| 101 | Yes         | 11      | 11-A | 100    | Bozic | 0   | unif   | wholeT_0.01 | DiP, DiP-A, OT, OT-A |
| 102 | Yes         | 11      | 11-A | 100    | Bozic | 0   | unif   | wholeT_0.5  | DiP, DiP-A, OT, OT-A |
| 103 | Yes         | 11      | 11-A | 100    | Bozic | Inf | last   | singleC     | DiP, DiP-A, OT, OT-A |
| 104 | Yes         | 11      | 11-A | 100    | Bozic | Inf | last   | wholeT_0.01 | DiP, DiP-A           |
| 105 | Yes         | 11      | 11-A | 100    | Bozic | Inf | last   | wholeT_0.5  | DiP, DiP-A, OT, OT-A |
| 106 | Yes         | 11      | 11-A | 100    | Bozic | Inf | unif   | singleC     | DiP, DiP-A           |
| 107 | Yes         | 11      | 11-A | 100    | Bozic | Inf | unif   | wholeT_0.01 | DiP, DiP-A           |
| 108 | Yes         | 11      | 11-A | 100    | Bozic | Inf | unif   | wholeT_0.5  | DiP, DiP-A           |
| 109 | Yes         | 11      | 11-A | 100    | exp   | 0   | last   | singleC     | DiP, DiP-A, OT, OT-A |
| 110 | Yes         | 11      | 11-A | 100    | exp   | 0   | last   | wholeT_0.01 | DiP, DiP-A, OT, OT-A |
| 111 | Yes         | 11      | 11-A | 100    | exp   | 0   | last   | wholeT_0.5  | DiP, DiP-A, OT, OT-A |
| 112 | Yes         | 11      | 11-A | 100    | exp   | 0   | unif   | singleC     | DiP, DiP-A, OT, OT-A |
| 113 | Yes         | 11      | 11-A | 100    | exp   | 0   | unif   | wholeT_0.01 | DiP, DiP-A           |
| 114 | Yes         | 11      | 11-A | 100    | exp   | 0   | unif   | wholeT_0.5  | DiP, DiP-A, OT, OT-A |
| 115 | Yes         | 11      | 11-A | 100    | exp   | Inf | last   | singleC     | DiP, DiP-A, OT, OT-A |
| 116 | Yes         | 11      | 11-A | 100    | exp   | Inf | last   | wholeT_0.01 | DiP, DiP-A, OT, OT-A |
| 117 | Yes         | 11      | 11-A | 100    | exp   | Inf | last   | wholeT_0.5  | DiP, DiP-A, OT, OT-A |

Table 4: (continued)

|     | Conjunction | Drivers | Tree | S.Size | Model | sh  | S.Time | S.Type      | Best method(s)       |
|-----|-------------|---------|------|--------|-------|-----|--------|-------------|----------------------|
| 118 | Yes         | 11      | 11-A | 100    | exp   | Inf | unif   | singleC     | DiP, DiP-A, OT, OT-A |
| 119 | Yes         | 11      | 11-A | 100    | exp   | Inf | unif   | wholeT_0.01 | DiP, DiP-A           |
| 120 | Yes         | 11      | 11-A | 100    | exp   | Inf | unif   | wholeT_0.5  | DiP, DiP-A, OT, OT-A |
| 121 | Yes         | 11      | 11-A | 100    | McF_4 | 0   | last   | singleC     | DiP, DiP-A, OT, OT-A |
| 122 | Yes         | 11      | 11-A | 100    | McF_4 | 0   | last   | wholeT_0.01 | DiP, DiP-A           |
| 123 | Yes         | 11      | 11-A | 100    | McF_4 | 0   | last   | wholeT_0.5  | DiP, DiP-A           |
| 124 | Yes         | 11      | 11-A | 100    | McF_4 | 0   | unif   | singleC     | DiP, DiP-A, OT, OT-A |
| 125 | Yes         | 11      | 11-A | 100    | McF_4 | 0   | unif   | wholeT_0.01 | DiP, DiP-A           |
| 126 | Yes         | 11      | 11-A | 100    | McF_4 | 0   | unif   | wholeT_0.5  | DiP, DiP-A, OT, OT-A |
| 127 | Yes         | 11      | 11-A | 100    | McF_4 | Inf | last   | singleC     | DiP, DiP-A, OT, OT-A |
| 128 | Yes         | 11      | 11-A | 100    | McF_4 | Inf | last   | wholeT_0.01 | DiP, DiP-A, OT       |
| 129 | Yes         | 11      | 11-A | 100    | McF_4 | Inf | last   | wholeT_0.5  | DiP, DiP-A, OT, OT-A |
| 130 | Yes         | 11      | 11-A | 100    | McF_4 | Inf | unif   | singleC     | DiP, DiP-A, OT, OT-A |
| 131 | Yes         | 11      | 11-A | 100    | McF_4 | Inf | unif   | wholeT_0.01 | DiP, DiP-A           |
| 132 | Yes         | 11      | 11-A | 100    | McF_4 | Inf | unif   | wholeT_0.5  | DiP, DiP-A, OT, OT-A |
| 133 | Yes         | 11      | 11-A | 100    | McF_6 | 0   | last   | singleC     | DiP, OT              |
| 134 | Yes         | 11      | 11-A | 100    | McF_6 | 0   | last   | wholeT_0.01 | DiP, OT              |
| 135 | Yes         | 11      | 11-A | 100    | McF_6 | 0   | last   | wholeT_0.5  | DiP, OT              |
| 136 | Yes         | 11      | 11-A | 100    | McF_6 | 0   | unif   | singleC     | DiP, DiP-A, OT, OT-A |
| 137 | Yes         | 11      | 11-A | 100    | McF_6 | 0   | unif   | wholeT_0.01 | DiP, DiP-A           |
| 138 | Yes         | 11      | 11-A | 100    | McF_6 | 0   | unif   | wholeT_0.5  | DiP, DiP-A, OT, OT-A |
| 139 | Yes         | 11      | 11-A | 100    | McF_6 | Inf | last   | singleC     | DiP, OT              |
| 140 | Yes         | 11      | 11-A | 100    | McF_6 | Inf | last   | wholeT_0.01 | DiP                  |
| 141 | Yes         | 11      | 11-A | 100    | McF_6 | Inf | last   | wholeT_0.5  | DiP, OT              |
| 142 | Yes         | 11      | 11-A | 100    | McF_6 | Inf | unif   | singleC     | DiP, DiP-A, OT, OT-A |
| 143 | Yes         | 11      | 11-A | 100    | McF_6 | Inf | unif   | wholeT_0.01 | DiP, OT, OT-A        |
| 144 | Yes         | 11      | 11-A | 100    | McF_6 | Inf | unif   | wholeT_0.5  | DiP, DiP-A, OT, OT-A |
| 145 | Yes         | 9       | 9-A  | 1000   | Bozic | 0   | last   | singleC     | DiP, DiP-A, OT, OT-A |
| 146 | Yes         | 9       | 9-A  | 1000   | Bozic | 0   | last   | wholeT_0.01 | DiP, DiP-A           |
| 147 | Yes         | 9       | 9-A  | 1000   | Bozic | 0   | last   | wholeT_0.5  | DiP, DiP-A, OT, OT-A |
| 148 | Yes         | 9       | 9-A  | 1000   | Bozic | 0   | unif   | singleC     | DiP, DiP-A, OT, OT-A |
| 149 | Yes         | 9       | 9-A  | 1000   | Bozic | 0   | unif   | wholeT_0.01 | DiP, DiP-A           |
| 150 | Yes         | 9       | 9-A  | 1000   | Bozic | 0   | unif   | wholeT_0.5  | DiP, DiP-A, OT, OT-A |
| 151 | Yes         | 9       | 9-A  | 1000   | Bozic | Inf | last   | singleC     | OT, OT-A             |
| 152 | Yes         | 9       | 9-A  | 1000   | Bozic | Inf | last   | wholeT_0.01 | DiP, DiP-A, OT, OT-A |
| 153 | Yes         | 9       | 9-A  | 1000   | Bozic | Inf | last   | wholeT_0.5  | OT, OT-A             |
| 154 | Yes         | 9       | 9-A  | 1000   | Bozic | Inf | unif   | singleC     | DiP, DiP-A           |
| 155 | Yes         | 9       | 9-A  | 1000   | Bozic | Inf | unif   | wholeT_0.01 | DiP, DiP-A           |
| 156 | Yes         | 9       | 9-A  | 1000   | Bozic | Inf | unif   | wholeT_0.5  | DiP, DiP-A, OT, OT-A |
| 157 | Yes         | 9       | 9-A  | 1000   | exp   | 0   | last   | singleC     | DiP, DiP-A, OT, OT-A |

Table 4: (continued)

|     | Conjunction | Drivers | Tree | S.Size | Model | sh  | S.Time | S.Type      | Best method(s)       |
|-----|-------------|---------|------|--------|-------|-----|--------|-------------|----------------------|
| 158 | Yes         | 9       | 9-A  | 1000   | exp   | 0   | last   | wholeT_0.01 | DiP-A, OT, OT-A      |
| 159 | Yes         | 9       | 9-A  | 1000   | exp   | 0   | last   | wholeT_0.5  | DiP, DiP-A, OT, OT-A |
| 160 | Yes         | 9       | 9-A  | 1000   | exp   | 0   | unif   | singleC     | DiP, DiP-A, OT, OT-A |
| 161 | Yes         | 9       | 9-A  | 1000   | exp   | 0   | unif   | wholeT_0.01 | DiP, DiP-A, OT, OT-A |
| 162 | Yes         | 9       | 9-A  | 1000   | exp   | 0   | unif   | wholeT_0.5  | DiP, DiP-A, OT, OT-A |
| 163 | Yes         | 9       | 9-A  | 1000   | exp   | Inf | last   | singleC     | OT, OT-A             |
| 164 | Yes         | 9       | 9-A  | 1000   | exp   | Inf | last   | wholeT_0.01 | DiP, DiP-A, OT, OT-A |
| 165 | Yes         | 9       | 9-A  | 1000   | exp   | Inf | last   | wholeT_0.5  | OT, OT-A             |
| 166 | Yes         | 9       | 9-A  | 1000   | exp   | Inf | unif   | singleC     | DiP, DiP-A, OT, OT-A |
| 167 | Yes         | 9       | 9-A  | 1000   | exp   | Inf | unif   | wholeT_0.01 | OT, OT-A             |
| 168 | Yes         | 9       | 9-A  | 1000   | exp   | Inf | unif   | wholeT_0.5  | DiP, DiP-A, OT, OT-A |
| 169 | Yes         | 9       | 9-A  | 1000   | McF_4 | 0   | last   | singleC     | DiP, DiP-A, OT, OT-A |
| 170 | Yes         | 9       | 9-A  | 1000   | McF_4 | 0   | last   | wholeT_0.01 | DiP, DiP-A, OT, OT-A |
| 171 | Yes         | 9       | 9-A  | 1000   | McF_4 | 0   | last   | wholeT_0.5  | DiP, DiP-A, OT, OT-A |
| 172 | Yes         | 9       | 9-A  | 1000   | McF_4 | 0   | unif   | singleC     | DiP, DiP-A, OT, OT-A |
| 173 | Yes         | 9       | 9-A  | 1000   | McF_4 | 0   | unif   | wholeT_0.01 | DiP, DiP-A           |
| 174 | Yes         | 9       | 9-A  | 1000   | McF_4 | 0   | unif   | wholeT_0.5  | DiP, DiP-A, OT, OT-A |
| 175 | Yes         | 9       | 9-A  | 1000   | McF_4 | Inf | last   | singleC     | OT, OT-A             |
| 176 | Yes         | 9       | 9-A  | 1000   | McF_4 | Inf | last   | wholeT_0.01 | DiP, OT              |
| 177 | Yes         | 9       | 9-A  | 1000   | McF_4 | Inf | last   | wholeT_0.5  | DiP, DiP-A, OT, OT-A |
| 178 | Yes         | 9       | 9-A  | 1000   | McF_4 | Inf | unif   | singleC     | DiP, DiP-A, OT, OT-A |
| 179 | Yes         | 9       | 9-A  | 1000   | McF_4 | Inf | unif   | wholeT_0.01 | OT, OT-A             |
| 180 | Yes         | 9       | 9-A  | 1000   | McF_4 | Inf | unif   | wholeT_0.5  | DiP, DiP-A, OT, OT-A |
| 181 | Yes         | 9       | 9-A  | 1000   | McF_6 | 0   | last   | singleC     | OT                   |
| 182 | Yes         | 9       | 9-A  | 1000   | McF_6 | 0   | last   | wholeT_0.01 | DiP, OT              |
| 183 | Yes         | 9       | 9-A  | 1000   | McF_6 | 0   | last   | wholeT_0.5  | DiP, OT              |
| 184 | Yes         | 9       | 9-A  | 1000   | McF_6 | 0   | unif   | singleC     | DiP, DiP-A, OT, OT-A |
| 185 | Yes         | 9       | 9-A  | 1000   | McF_6 | 0   | unif   | wholeT_0.01 | DiP, DiP-A, OT, OT-A |
| 186 | Yes         | 9       | 9-A  | 1000   | McF_6 | 0   | unif   | wholeT_0.5  | DiP, DiP-A, OT, OT-A |
| 187 | Yes         | 9       | 9-A  | 1000   | McF_6 | Inf | last   | singleC     | DiP, OT              |
| 188 | Yes         | 9       | 9-A  | 1000   | McF_6 | Inf | last   | wholeT_0.01 | OT                   |
| 189 | Yes         | 9       | 9-A  | 1000   | McF_6 | Inf | last   | wholeT_0.5  | DiP, OT              |
| 190 | Yes         | 9       | 9-A  | 1000   | McF_6 | Inf | unif   | singleC     | DiP, DiP-A, OT, OT-A |
| 191 | Yes         | 9       | 9-A  | 1000   | McF_6 | Inf | unif   | wholeT_0.01 | DiP, DiP-A, OT, OT-A |
| 192 | Yes         | 9       | 9-A  | 1000   | McF_6 | Inf | unif   | wholeT_0.5  | DiP, DiP-A, OT, OT-A |
| 193 | Yes         | 9       | 9-A  | 200    | Bozic | 0   | last   | singleC     | DiP, DiP-A, OT, OT-A |
| 194 | Yes         | 9       | 9-A  | 200    | Bozic | 0   | last   | wholeT_0.01 | DiP, DiP-A           |
| 195 | Yes         | 9       | 9-A  | 200    | Bozic | 0   | last   | wholeT_0.5  | DiP, DiP-A, OT, OT-A |
| 196 | Yes         | 9       | 9-A  | 200    | Bozic | 0   | unif   | singleC     | DiP, DiP-A, OT, OT-A |
| 197 | Yes         | 9       | 9-A  | 200    | Bozic | 0   | unif   | wholeT_0.01 | DiP, DiP-A, OT, OT-A |

Table 4: (continued)

|     | Conjunction | Drivers | Tree | S.Size | Model | sh  | S.Time | S.Type      | Best method(s)       |
|-----|-------------|---------|------|--------|-------|-----|--------|-------------|----------------------|
| 198 | Yes         | 9       | 9-A  | 200    | Bozic | 0   | unif   | wholeT_0.5  | DiP, DiP-A, OT, OT-A |
| 199 | Yes         | 9       | 9-A  | 200    | Bozic | Inf | last   | singleC     | OT, OT-A             |
| 200 | Yes         | 9       | 9-A  | 200    | Bozic | Inf | last   | wholeT_0.01 | DiP, DiP-A           |
| 201 | Yes         | 9       | 9-A  | 200    | Bozic | Inf | last   | wholeT_0.5  | OT, OT-A             |
| 202 | Yes         | 9       | 9-A  | 200    | Bozic | Inf | unif   | singleC     | DiP, DiP-A, OT, OT-A |
| 203 | Yes         | 9       | 9-A  | 200    | Bozic | Inf | unif   | wholeT_0.01 | DiP, DiP-A, OT, OT-A |
| 204 | Yes         | 9       | 9-A  | 200    | Bozic | Inf | unif   | wholeT_0.5  | DiP, DiP-A, OT, OT-A |
| 205 | Yes         | 9       | 9-A  | 200    | exp   | 0   | last   | singleC     | DiP, DiP-A, OT, OT-A |
| 206 | Yes         | 9       | 9-A  | 200    | exp   | 0   | last   | wholeT_0.01 | DiP, DiP-A, OT, OT-A |
| 207 | Yes         | 9       | 9-A  | 200    | exp   | 0   | last   | wholeT_0.5  | DiP, DiP-A, OT, OT-A |
| 208 | Yes         | 9       | 9-A  | 200    | exp   | 0   | unif   | singleC     | DiP, DiP-A, OT, OT-A |
| 209 | Yes         | 9       | 9-A  | 200    | exp   | 0   | unif   | wholeT_0.01 | DiP, DiP-A, OT, OT-A |
| 210 | Yes         | 9       | 9-A  | 200    | exp   | 0   | unif   | wholeT_0.5  | DiP, DiP-A, OT, OT-A |
| 211 | Yes         | 9       | 9-A  | 200    | exp   | Inf | last   | singleC     | DiP, DiP-A, OT, OT-A |
| 212 | Yes         | 9       | 9-A  | 200    | exp   | Inf | last   | wholeT_0.01 | DiP, DiP-A           |
| 213 | Yes         | 9       | 9-A  | 200    | exp   | Inf | last   | wholeT_0.5  | DiP, DiP-A, OT, OT-A |
| 214 | Yes         | 9       | 9-A  | 200    | exp   | Inf | unif   | singleC     | DiP, DiP-A, OT, OT-A |
| 215 | Yes         | 9       | 9-A  | 200    | exp   | Inf | unif   | wholeT_0.01 | DiP, DiP-A           |
| 216 | Yes         | 9       | 9-A  | 200    | exp   | Inf | unif   | wholeT_0.5  | DiP, DiP-A, OT, OT-A |
| 217 | Yes         | 9       | 9-A  | 200    | McF_4 | 0   | last   | singleC     | DiP, DiP-A, OT, OT-A |
| 218 | Yes         | 9       | 9-A  | 200    | McF_4 | 0   | last   | wholeT_0.01 | DiP, DiP-A           |
| 219 | Yes         | 9       | 9-A  | 200    | McF_4 | 0   | last   | wholeT_0.5  | DiP, DiP-A, OT, OT-A |
| 220 | Yes         | 9       | 9-A  | 200    | McF_4 | 0   | unif   | singleC     | DiP, DiP-A, OT, OT-A |
| 221 | Yes         | 9       | 9-A  | 200    | McF_4 | 0   | unif   | wholeT_0.01 | DiP, DiP-A           |
| 222 | Yes         | 9       | 9-A  | 200    | McF_4 | 0   | unif   | wholeT_0.5  | DiP, DiP-A, OT, OT-A |
| 223 | Yes         | 9       | 9-A  | 200    | McF_4 | Inf | last   | singleC     | OT, OT-A             |
| 224 | Yes         | 9       | 9-A  | 200    | McF_4 | Inf | last   | wholeT_0.01 | DiP, OT              |
| 225 | Yes         | 9       | 9-A  | 200    | McF_4 | Inf | last   | wholeT_0.5  | DiP, DiP-A, OT, OT-A |
| 226 | Yes         | 9       | 9-A  | 200    | McF_4 | Inf | unif   | singleC     | DiP, DiP-A, OT, OT-A |
| 227 | Yes         | 9       | 9-A  | 200    | McF_4 | Inf | unif   | wholeT_0.01 | DiP, DiP-A, OT, OT-A |
| 228 | Yes         | 9       | 9-A  | 200    | McF_4 | Inf | unif   | wholeT_0.5  | DiP, DiP-A, OT, OT-A |
| 229 | Yes         | 9       | 9-A  | 200    | McF_6 | 0   | last   | singleC     | DiP, OT              |
| 230 | Yes         | 9       | 9-A  | 200    | McF_6 | 0   | last   | wholeT_0.01 | DiP, OT              |
| 231 | Yes         | 9       | 9-A  | 200    | McF_6 | 0   | last   | wholeT_0.5  | DiP, OT              |
| 232 | Yes         | 9       | 9-A  | 200    | McF_6 | 0   | unif   | singleC     | DiP, DiP-A, OT, OT-A |
| 233 | Yes         | 9       | 9-A  | 200    | McF_6 | 0   | unif   | wholeT_0.01 | DiP, DiP-A, OT, OT-A |
| 234 | Yes         | 9       | 9-A  | 200    | McF_6 | 0   | unif   | wholeT_0.5  | DiP, DiP-A, OT, OT-A |
| 235 | Yes         | 9       | 9-A  | 200    | McF_6 | Inf | last   | singleC     | DiP, OT              |
| 236 | Yes         | 9       | 9-A  | 200    | McF_6 | Inf | last   | wholeT_0.01 | OT                   |
| 237 | Yes         | 9       | 9-A  | 200    | McF_6 | Inf | last   | wholeT_0.5  | DiP, OT              |

Table 4: (continued)

|     | Conjunction | Drivers | Tree | S.Size | Model | sh  | S.Time | S.Type      | Best method(s)       |
|-----|-------------|---------|------|--------|-------|-----|--------|-------------|----------------------|
| 238 | Yes         | 9       | 9-A  | 200    | McF_6 | Inf | unif   | singleC     | DiP, DiP-A, OT, OT-A |
| 239 | Yes         | 9       | 9-A  | 200    | McF_6 | Inf | unif   | wholeT_0.01 | DiP, DiP-A, OT, OT-A |
| 240 | Yes         | 9       | 9-A  | 200    | McF_6 | Inf | unif   | wholeT_0.5  | DiP, DiP-A, OT, OT-A |
| 241 | Yes         | 9       | 9-A  | 100    | Bozic | 0   | last   | singleC     | DiP, DiP-A, OT, OT-A |
| 242 | Yes         | 9       | 9-A  | 100    | Bozic | 0   | last   | wholeT_0.01 | DiP, DiP-A, OT, OT-A |
| 243 | Yes         | 9       | 9-A  | 100    | Bozic | 0   | last   | wholeT_0.5  | DiP, DiP-A, OT, OT-A |
| 244 | Yes         | 9       | 9-A  | 100    | Bozic | 0   | unif   | singleC     | DiP, DiP-A, OT, OT-A |
| 245 | Yes         | 9       | 9-A  | 100    | Bozic | 0   | unif   | wholeT_0.01 | DiP, DiP-A           |
| 246 | Yes         | 9       | 9-A  | 100    | Bozic | 0   | unif   | wholeT_0.5  | DiP, DiP-A, OT, OT-A |
| 247 | Yes         | 9       | 9-A  | 100    | Bozic | Inf | last   | singleC     | DiP, DiP-A, OT, OT-A |
| 248 | Yes         | 9       | 9-A  | 100    | Bozic | Inf | last   | wholeT_0.01 | DiP, DiP-A           |
| 249 | Yes         | 9       | 9-A  | 100    | Bozic | Inf | last   | wholeT_0.5  | DiP, DiP-A, OT, OT-A |
| 250 | Yes         | 9       | 9-A  | 100    | Bozic | Inf | unif   | singleC     | DiP, DiP-A, OT, OT-A |
| 251 | Yes         | 9       | 9-A  | 100    | Bozic | Inf | unif   | wholeT_0.01 | DiP, DiP-A, OT, OT-A |
| 252 | Yes         | 9       | 9-A  | 100    | Bozic | Inf | unif   | wholeT_0.5  | DiP, DiP-A, OT, OT-A |
| 253 | Yes         | 9       | 9-A  | 100    | exp   | 0   | last   | singleC     | DiP, DiP-A, OT, OT-A |
| 254 | Yes         | 9       | 9-A  | 100    | exp   | 0   | last   | wholeT_0.01 | DiP, DiP-A, OT, OT-A |
| 255 | Yes         | 9       | 9-A  | 100    | exp   | 0   | last   | wholeT_0.5  | DiP, DiP-A, OT, OT-A |
| 256 | Yes         | 9       | 9-A  | 100    | exp   | 0   | unif   | singleC     | DiP, DiP-A, OT, OT-A |
| 257 | Yes         | 9       | 9-A  | 100    | exp   | 0   | unif   | wholeT_0.01 | DiP, DiP-A, OT, OT-A |
| 258 | Yes         | 9       | 9-A  | 100    | exp   | 0   | unif   | wholeT_0.5  | DiP, DiP-A, OT, OT-A |
| 259 | Yes         | 9       | 9-A  | 100    | exp   | Inf | last   | singleC     | DiP, DiP-A, OT, OT-A |
| 260 | Yes         | 9       | 9-A  | 100    | exp   | Inf | last   | wholeT_0.01 | DiP, DiP-A           |
| 261 | Yes         | 9       | 9-A  | 100    | exp   | Inf | last   | wholeT_0.5  | DiP, DiP-A, OT, OT-A |
| 262 | Yes         | 9       | 9-A  | 100    | exp   | Inf | unif   | singleC     | DiP, DiP-A, OT, OT-A |
| 263 | Yes         | 9       | 9-A  | 100    | exp   | Inf | unif   | wholeT_0.01 | DiP, DiP-A           |
| 264 | Yes         | 9       | 9-A  | 100    | exp   | Inf | unif   | wholeT_0.5  | DiP, DiP-A, OT, OT-A |
| 265 | Yes         | 9       | 9-A  | 100    | McF_4 | 0   | last   | singleC     | DiP, DiP-A, OT, OT-A |
| 266 | Yes         | 9       | 9-A  | 100    | McF_4 | 0   | last   | wholeT_0.01 | DiP, DiP-A           |
| 267 | Yes         | 9       | 9-A  | 100    | McF_4 | 0   | last   | wholeT_0.5  | DiP, DiP-A, OT, OT-A |
| 268 | Yes         | 9       | 9-A  | 100    | McF_4 | 0   | unif   | singleC     | DiP, DiP-A, OT, OT-A |
| 269 | Yes         | 9       | 9-A  | 100    | McF_4 | 0   | unif   | wholeT_0.01 | DiP, DiP-A           |
| 270 | Yes         | 9       | 9-A  | 100    | McF_4 | 0   | unif   | wholeT_0.5  | DiP, DiP-A, OT, OT-A |
| 271 | Yes         | 9       | 9-A  | 100    | McF_4 | Inf | last   | singleC     | DiP, DiP-A, OT, OT-A |
| 272 | Yes         | 9       | 9-A  | 100    | McF_4 | Inf | last   | wholeT_0.01 | DiP, OT              |
| 273 | Yes         | 9       | 9-A  | 100    | McF_4 | Inf | last   | wholeT_0.5  | DiP, DiP-A, OT, OT-A |
| 274 | Yes         | 9       | 9-A  | 100    | McF_4 | Inf | unif   | singleC     | DiP, DiP-A, OT, OT-A |
| 275 | Yes         | 9       | 9-A  | 100    | McF_4 | Inf | unif   | wholeT_0.01 | DiP, DiP-A, OT, OT-A |
| 276 | Yes         | 9       | 9-A  | 100    | McF_4 | Inf | unif   | wholeT_0.5  | DiP, DiP-A, OT, OT-A |
| 277 | Yes         | 9       | 9-A  | 100    | McF_6 | 0   | last   | singleC     | DiP, OT              |

Table 4: (continued)

|     | Conjunction | Drivers | Tree | S.Size | Model | sh  | S.Time | S.Type      | Best method(s)                   |
|-----|-------------|---------|------|--------|-------|-----|--------|-------------|----------------------------------|
| 278 | Yes         | 9       | 9-A  | 100    | McF_6 | 0   | last   | wholeT_0.01 | DiP, OT                          |
| 279 | Yes         | 9       | 9-A  | 100    | McF_6 | 0   | last   | wholeT_0.5  | DiP, OT                          |
| 280 | Yes         | 9       | 9-A  | 100    | McF_6 | 0   | unif   | singleC     | DiP, DiP-A, OT                   |
| 281 | Yes         | 9       | 9-A  | 100    | McF_6 | 0   | unif   | wholeT_0.01 | DiP, DiP-A, OT, OT-A             |
| 282 | Yes         | 9       | 9-A  | 100    | McF_6 | 0   | unif   | wholeT_0.5  | DiP, DiP-A, OT, OT-A             |
| 283 | Yes         | 9       | 9-A  | 100    | McF_6 | Inf | last   | singleC     | DiP, OT                          |
| 284 | Yes         | 9       | 9-A  | 100    | McF_6 | Inf | last   | wholeT_0.01 | DiP, OT                          |
| 285 | Yes         | 9       | 9-A  | 100    | McF_6 | Inf | last   | wholeT_0.5  | DiP, OT                          |
| 286 | Yes         | 9       | 9-A  | 100    | McF_6 | Inf | unif   | singleC     | DiP, DiP-A, OT, OT-A             |
| 287 | Yes         | 9       | 9-A  | 100    | McF_6 | Inf | unif   | wholeT_0.01 | DiP, OT, OT-A                    |
| 288 | Yes         | 9       | 9-A  | 100    | McF_6 | Inf | unif   | wholeT_0.5  | DiP, DiP-A, OT, OT-A             |
| 289 | Yes         | 7       | 7-A  | 1000   | Bozic | 0   | last   | singleC     | DiP, DiP-A, OT, OT-A             |
| 290 | Yes         | 7       | 7-A  | 1000   | Bozic | 0   | last   | wholeT_0.01 | DiP, DiP-A                       |
| 291 | Yes         | 7       | 7-A  | 1000   | Bozic | 0   | last   | wholeT_0.5  | DiP, DiP-A, OT, OT-A             |
| 292 | Yes         | 7       | 7-A  | 1000   | Bozic | 0   | unif   | singleC     | DiP, DiP-A, OT, OT-A             |
| 293 | Yes         | 7       | 7-A  | 1000   | Bozic | 0   | unif   | wholeT_0.01 | CBN, CBN-A, DiP, DiP-A, OT, OT-A |
| 294 | Yes         | 7       | 7-A  | 1000   | Bozic | 0   | unif   | wholeT_0.5  | DiP, DiP-A, OT, OT-A             |
| 295 | Yes         | 7       | 7-A  | 1000   | Bozic | Inf | last   | singleC     | DiP, DiP-A, OT, OT-A             |
| 296 | Yes         | 7       | 7-A  | 1000   | Bozic | Inf | last   | wholeT_0.01 | DiP, DiP-A, OT, OT-A             |
| 297 | Yes         | 7       | 7-A  | 1000   | Bozic | Inf | last   | wholeT_0.5  | DiP, DiP-A, OT, OT-A             |
| 298 | Yes         | 7       | 7-A  | 1000   | Bozic | Inf | unif   | singleC     | CBN, CBN-A                       |
| 299 | Yes         | 7       | 7-A  | 1000   | Bozic | Inf | unif   | wholeT_0.01 | DiP, DiP-A                       |
| 300 | Yes         | 7       | 7-A  | 1000   | Bozic | Inf | unif   | wholeT_0.5  | CBN, CBN-A                       |
| 301 | Yes         | 7       | 7-A  | 1000   | exp   | 0   | last   | singleC     | DiP, DiP-A, OT, OT-A             |
| 302 | Yes         | 7       | 7-A  | 1000   | exp   | 0   | last   | wholeT_0.01 | DiP, DiP-A, OT, OT-A             |
| 303 | Yes         | 7       | 7-A  | 1000   | exp   | 0   | last   | wholeT_0.5  | DiP, DiP-A, OT, OT-A             |
| 304 | Yes         | 7       | 7-A  | 1000   | exp   | 0   | unif   | singleC     | DiP, DiP-A, OT, OT-A             |
| 305 | Yes         | 7       | 7-A  | 1000   | exp   | 0   | unif   | wholeT_0.01 | DiP, DiP-A                       |
| 306 | Yes         | 7       | 7-A  | 1000   | exp   | 0   | unif   | wholeT_0.5  | DiP, DiP-A, OT, OT-A             |
| 307 | Yes         | 7       | 7-A  | 1000   | exp   | Inf | last   | singleC     | DiP, DiP-A, OT, OT-A             |
| 308 | Yes         | 7       | 7-A  | 1000   | exp   | Inf | last   | wholeT_0.01 | DiP, DiP-A, OT, OT-A             |
| 309 | Yes         | 7       | 7-A  | 1000   | exp   | Inf | last   | wholeT_0.5  | DiP, DiP-A, OT, OT-A             |
| 310 | Yes         | 7       | 7-A  | 1000   | exp   | Inf | unif   | singleC     | DiP, DiP-A                       |
| 311 | Yes         | 7       | 7-A  | 1000   | exp   | Inf | unif   | wholeT_0.01 | DiP, DiP-A, OT, OT-A             |
| 312 | Yes         | 7       | 7-A  | 1000   | exp   | Inf | unif   | wholeT_0.5  | DiP, DiP-A                       |
| 313 | Yes         | 7       | 7-A  | 1000   | McF_4 | 0   | last   | singleC     | DiP, DiP-A, OT, OT-A             |
| 314 | Yes         | 7       | 7-A  | 1000   | McF_4 | 0   | last   | wholeT_0.01 | OT, OT-A                         |
| 315 | Yes         | 7       | 7-A  | 1000   | McF_4 | 0   | last   | wholeT_0.5  | DiP, DiP-A, OT, OT-A             |
| 316 | Yes         | 7       | 7-A  | 1000   | McF_4 | 0   | unif   | singleC     | DiP, DiP-A                       |
| 317 | Yes         | 7       | 7-A  | 1000   | McF_4 | 0   | unif   | wholeT_0.01 | DiP, DiP-A, OT                   |

Table 4: (continued)

|     | Conjunction | Drivers | Tree | S.Size | Model | sh  | S.Time | S.Type      | Best method(s)                   |
|-----|-------------|---------|------|--------|-------|-----|--------|-------------|----------------------------------|
| 318 | Yes         | 7       | 7-A  | 1000   | McF_4 | 0   | unif   | wholeT_0.5  | DiP, DiP-A                       |
| 319 | Yes         | 7       | 7-A  | 1000   | McF_4 | Inf | last   | singleC     | DiP, DiP-A, OT, OT-A             |
| 320 | Yes         | 7       | 7-A  | 1000   | McF_4 | Inf | last   | wholeT_0.01 | OT, OT-A                         |
| 321 | Yes         | 7       | 7-A  | 1000   | McF_4 | Inf | last   | wholeT_0.5  | DiP, DiP-A, OT, OT-A             |
| 322 | Yes         | 7       | 7-A  | 1000   | McF_4 | Inf | unif   | singleC     | DiP, DiP-A, OT, OT-A             |
| 323 | Yes         | 7       | 7-A  | 1000   | McF_4 | Inf | unif   | wholeT_0.01 | DiP, DiP-A, OT, OT-A             |
| 324 | Yes         | 7       | 7-A  | 1000   | McF_4 | Inf | unif   | wholeT_0.5  | DiP, DiP-A, OT, OT-A             |
| 325 | Yes         | 7       | 7-A  | 1000   | McF_6 | 0   | last   | singleC     | DiP, OT, OT-A                    |
| 326 | Yes         | 7       | 7-A  | 1000   | McF_6 | 0   | last   | wholeT_0.01 | DiP, OT, OT-A                    |
| 327 | Yes         | 7       | 7-A  | 1000   | McF_6 | 0   | last   | wholeT_0.5  | DiP, OT, OT-A                    |
| 328 | Yes         | 7       | 7-A  | 1000   | McF_6 | 0   | unif   | singleC     | CBN, CBN-A, DiP, DiP-A, OT, OT-A |
| 329 | Yes         | 7       | 7-A  | 1000   | McF_6 | 0   | unif   | wholeT_0.01 | CBN, CBN-A, DiP, DiP-A, OT, OT-A |
| 330 | Yes         | 7       | 7-A  | 1000   | McF_6 | 0   | unif   | wholeT_0.5  | CBN, CBN-A, DiP, DiP-A, OT, OT-A |
| 331 | Yes         | 7       | 7-A  | 1000   | McF_6 | Inf | last   | singleC     | DiP, DiP-A, OT, OT-A             |
| 332 | Yes         | 7       | 7-A  | 1000   | McF_6 | Inf | last   | wholeT_0.01 | DiP, OT, OT-A                    |
| 333 | Yes         | 7       | 7-A  | 1000   | McF_6 | Inf | last   | wholeT_0.5  | DiP, OT, OT-A                    |
| 334 | Yes         | 7       | 7-A  | 1000   | McF_6 | Inf | unif   | singleC     | CBN, CBN-A, DiP, DiP-A, OT, OT-A |
| 335 | Yes         | 7       | 7-A  | 1000   | McF_6 | Inf | unif   | wholeT_0.01 | CBN, CBN-A, OT, OT-A             |
| 336 | Yes         | 7       | 7-A  | 1000   | McF_6 | Inf | unif   | wholeT_0.5  | CBN, CBN-A, DiP, DiP-A, OT, OT-A |
| 337 | Yes         | 7       | 7-A  | 200    | Bozic | 0   | last   | singleC     | DiP, DiP-A, OT, OT-A             |
| 338 | Yes         | 7       | 7-A  | 200    | Bozic | 0   | last   | wholeT_0.01 | DiP, DiP-A, OT, OT-A             |
| 339 | Yes         | 7       | 7-A  | 200    | Bozic | 0   | last   | wholeT_0.5  | DiP, DiP-A, OT, OT-A             |
| 340 | Yes         | 7       | 7-A  | 200    | Bozic | 0   | unif   | singleC     | DiP, DiP-A, OT, OT-A             |
| 341 | Yes         | 7       | 7-A  | 200    | Bozic | 0   | unif   | wholeT_0.01 | CBN, CBN-A, DiP, DiP-A, OT, OT-A |
| 342 | Yes         | 7       | 7-A  | 200    | Bozic | 0   | unif   | wholeT_0.5  | DiP, DiP-A, OT, OT-A             |
| 343 | Yes         | 7       | 7-A  | 200    | Bozic | Inf | last   | singleC     | DiP, DiP-A, OT, OT-A             |
| 344 | Yes         | 7       | 7-A  | 200    | Bozic | Inf | last   | wholeT_0.01 | DiP, DiP-A                       |
| 345 | Yes         | 7       | 7-A  | 200    | Bozic | Inf | last   | wholeT_0.5  | DiP, DiP-A, OT, OT-A             |
| 346 | Yes         | 7       | 7-A  | 200    | Bozic | Inf | unif   | singleC     | DiP, DiP-A                       |
| 347 | Yes         | 7       | 7-A  | 200    | Bozic | Inf | unif   | wholeT_0.01 | DiP, DiP-A, OT, OT-A             |
| 348 | Yes         | 7       | 7-A  | 200    | Bozic | Inf | unif   | wholeT_0.5  | DiP, DiP-A                       |
| 349 | Yes         | 7       | 7-A  | 200    | exp   | 0   | last   | singleC     | DiP, DiP-A, OT, OT-A             |
| 350 | Yes         | 7       | 7-A  | 200    | exp   | 0   | last   | wholeT_0.01 | DiP, DiP-A                       |
| 351 | Yes         | 7       | 7-A  | 200    | exp   | 0   | last   | wholeT_0.5  | DiP, DiP-A, OT, OT-A             |
| 352 | Yes         | 7       | 7-A  | 200    | exp   | 0   | unif   | singleC     | DiP, DiP-A, OT, OT-A             |
| 353 | Yes         | 7       | 7-A  | 200    | exp   | 0   | unif   | wholeT_0.01 | DiP, DiP-A                       |
| 354 | Yes         | 7       | 7-A  | 200    | exp   | 0   | unif   | wholeT_0.5  | DiP, DiP-A, OT, OT-A             |
| 355 | Yes         | 7       | 7-A  | 200    | exp   | Inf | last   | singleC     | DiP, DiP-A, OT, OT-A             |
| 356 | Yes         | 7       | 7-A  | 200    | exp   | Inf | last   | wholeT_0.01 | DiP, DiP-A                       |
| 357 | Yes         | 7       | 7-A  | 200    | exp   | Inf | last   | wholeT_0.5  | DiP, DiP-A, OT, OT-A             |

Table 4: (continued)

|     | Conjunction | Drivers | Tree | S.Size | Model | sh  | S.Time | S.Type      | Best method(s)                   |
|-----|-------------|---------|------|--------|-------|-----|--------|-------------|----------------------------------|
| 358 | Yes         | 7       | 7-A  | 200    | exp   | Inf | unif   | singleC     | DiP, DiP-A                       |
| 359 | Yes         | 7       | 7-A  | 200    | exp   | Inf | unif   | wholeT_0.01 | DiP, DiP-A, OT, OT-A             |
| 360 | Yes         | 7       | 7-A  | 200    | exp   | Inf | unif   | wholeT_0.5  | DiP, DiP-A                       |
| 361 | Yes         | 7       | 7-A  | 200    | McF_4 | 0   | last   | singleC     | DiP, DiP-A, OT, OT-A             |
| 362 | Yes         | 7       | 7-A  | 200    | McF_4 | 0   | last   | wholeT_0.01 | DiP, DiP-A, OT, OT-A             |
| 363 | Yes         | 7       | 7-A  | 200    | McF_4 | 0   | last   | wholeT_0.5  | DiP, DiP-A                       |
| 364 | Yes         | 7       | 7-A  | 200    | McF_4 | 0   | unif   | singleC     | DiP, DiP-A, OT, OT-A             |
| 365 | Yes         | 7       | 7-A  | 200    | McF_4 | 0   | unif   | wholeT_0.01 | DiP, DiP-A, OT, OT-A             |
| 366 | Yes         | 7       | 7-A  | 200    | McF_4 | 0   | unif   | wholeT_0.5  | DiP, DiP-A, OT, OT-A             |
| 367 | Yes         | 7       | 7-A  | 200    | McF_4 | Inf | last   | singleC     | DiP, DiP-A, OT, OT-A             |
| 368 | Yes         | 7       | 7-A  | 200    | McF_4 | Inf | last   | wholeT_0.01 | DiP, DiP-A, OT, OT-A             |
| 369 | Yes         | 7       | 7-A  | 200    | McF_4 | Inf | last   | wholeT_0.5  | DiP, DiP-A, OT, OT-A             |
| 370 | Yes         | 7       | 7-A  | 200    | McF_4 | Inf | unif   | singleC     | DiP, DiP-A, OT, OT-A             |
| 371 | Yes         | 7       | 7-A  | 200    | McF_4 | Inf | unif   | wholeT_0.01 | DiP, DiP-A, OT, OT-A             |
| 372 | Yes         | 7       | 7-A  | 200    | McF_4 | Inf | unif   | wholeT_0.5  | DiP, DiP-A, OT, OT-A             |
| 373 | Yes         | 7       | 7-A  | 200    | McF_6 | 0   | last   | singleC     | DiP, OT, OT-A                    |
| 374 | Yes         | 7       | 7-A  | 200    | McF_6 | 0   | last   | wholeT_0.01 | DiP, OT, OT-A                    |
| 375 | Yes         | 7       | 7-A  | 200    | McF_6 | 0   | last   | wholeT_0.5  | DiP, OT, OT-A                    |
| 376 | Yes         | 7       | 7-A  | 200    | McF_6 | 0   | unif   | singleC     | CBN, CBN-A, DiP, DiP-A           |
| 377 | Yes         | 7       | 7-A  | 200    | McF_6 | 0   | unif   | wholeT_0.01 | CBN, CBN-A, DiP, DiP-A, OT, OT-A |
| 378 | Yes         | 7       | 7-A  | 200    | McF_6 | 0   | unif   | wholeT_0.5  | CBN, CBN-A, DiP, DiP-A           |
| 379 | Yes         | 7       | 7-A  | 200    | McF_6 | Inf | last   | singleC     | DiP, DiP-A, OT, OT-A             |
| 380 | Yes         | 7       | 7-A  | 200    | McF_6 | Inf | last   | wholeT_0.01 | DiP, OT, OT-A                    |
| 381 | Yes         | 7       | 7-A  | 200    | McF_6 | Inf | last   | wholeT_0.5  | DiP, DiP-A, OT, OT-A             |
| 382 | Yes         | 7       | 7-A  | 200    | McF_6 | Inf | unif   | singleC     | CBN, CBN-A, DiP, DiP-A           |
| 383 | Yes         | 7       | 7-A  | 200    | McF_6 | Inf | unif   | wholeT_0.01 | CBN, CBN-A, DiP, DiP-A           |
| 384 | Yes         | 7       | 7-A  | 200    | McF_6 | Inf | unif   | wholeT_0.5  | CBN, CBN-A, DiP, DiP-A           |
| 385 | Yes         | 7       | 7-A  | 100    | Bozic | 0   | last   | singleC     | DiP, DiP-A, OT, OT-A             |
| 386 | Yes         | 7       | 7-A  | 100    | Bozic | 0   | last   | wholeT_0.01 | DiP, DiP-A, OT, OT-A             |
| 387 | Yes         | 7       | 7-A  | 100    | Bozic | 0   | last   | wholeT_0.5  | DiP, DiP-A, OT, OT-A             |
| 388 | Yes         | 7       | 7-A  | 100    | Bozic | 0   | unif   | singleC     | DiP, DiP-A, OT, OT-A             |
| 389 | Yes         | 7       | 7-A  | 100    | Bozic | 0   | unif   | wholeT_0.01 | CBN, DiP, DiP-A, OT, OT-A        |
| 390 | Yes         | 7       | 7-A  | 100    | Bozic | 0   | unif   | wholeT_0.5  | DiP, DiP-A, OT, OT-A             |
| 391 | Yes         | 7       | 7-A  | 100    | Bozic | Inf | last   | singleC     | DiP, DiP-A, OT, OT-A             |
| 392 | Yes         | 7       | 7-A  | 100    | Bozic | Inf | last   | wholeT_0.01 | DiP, DiP-A, OT, OT-A             |
| 393 | Yes         | 7       | 7-A  | 100    | Bozic | Inf | last   | wholeT_0.5  | DiP, DiP-A, OT, OT-A             |
| 394 | Yes         | 7       | 7-A  | 100    | Bozic | Inf | unif   | singleC     | DiP, DiP-A                       |
| 395 | Yes         | 7       | 7-A  | 100    | Bozic | Inf | unif   | wholeT_0.01 | DiP-A, OT, OT-A                  |
| 396 | Yes         | 7       | 7-A  | 100    | Bozic | Inf | unif   | wholeT_0.5  | DiP, DiP-A                       |
| 397 | Yes         | 7       | 7-A  | 100    | exp   | 0   | last   | singleC     | DiP, DiP-A, OT, OT-A             |



Table 4: (continued)

|     | Conjunction | Drivers | Tree | S.Size | Model | sh  | S.Time | S.Type      | Best method(s)         |
|-----|-------------|---------|------|--------|-------|-----|--------|-------------|------------------------|
| 398 | Yes         | 7       | 7-A  | 100    | exp   | 0   | last   | wholeT_0.01 | DiP, DiP-A             |
| 399 | Yes         | 7       | 7-A  | 100    | exp   | 0   | last   | wholeT_0.5  | DiP, DiP-A, OT, OT-A   |
| 400 | Yes         | 7       | 7-A  | 100    | exp   | 0   | unif   | singleC     | DiP, DiP-A, OT, OT-A   |
| 401 | Yes         | 7       | 7-A  | 100    | exp   | 0   | unif   | wholeT_0.01 | DiP, DiP-A             |
| 402 | Yes         | 7       | 7-A  | 100    | exp   | 0   | unif   | wholeT_0.5  | DiP, DiP-A, OT, OT-A   |
| 403 | Yes         | 7       | 7-A  | 100    | exp   | Inf | last   | singleC     | DiP, DiP-A, OT, OT-A   |
| 404 | Yes         | 7       | 7-A  | 100    | exp   | Inf | last   | wholeT_0.01 | DiP, DiP-A             |
| 405 | Yes         | 7       | 7-A  | 100    | exp   | Inf | last   | wholeT_0.5  | DiP, DiP-A, OT, OT-A   |
| 406 | Yes         | 7       | 7-A  | 100    | exp   | Inf | unif   | singleC     | DiP, DiP-A, OT, OT-A   |
| 407 | Yes         | 7       | 7-A  | 100    | exp   | Inf | unif   | wholeT_0.01 | DiP, DiP-A, OT, OT-A   |
| 408 | Yes         | 7       | 7-A  | 100    | exp   | Inf | unif   | wholeT_0.5  | DiP, DiP-A             |
| 409 | Yes         | 7       | 7-A  | 100    | McF_4 | 0   | last   | singleC     | DiP, DiP-A, OT, OT-A   |
| 410 | Yes         | 7       | 7-A  | 100    | McF_4 | 0   | last   | wholeT_0.01 | DiP, DiP-A             |
| 411 | Yes         | 7       | 7-A  | 100    | McF_4 | 0   | last   | wholeT_0.5  | DiP, DiP-A, OT, OT-A   |
| 412 | Yes         | 7       | 7-A  | 100    | McF_4 | 0   | unif   | singleC     | DiP, DiP-A             |
| 413 | Yes         | 7       | 7-A  | 100    | McF_4 | 0   | unif   | wholeT_0.01 | DiP, DiP-A             |
| 414 | Yes         | 7       | 7-A  | 100    | McF_4 | 0   | unif   | wholeT_0.5  | DiP, DiP-A, OT, OT-A   |
| 415 | Yes         | 7       | 7-A  | 100    | McF_4 | Inf | last   | singleC     | DiP, DiP-A, OT, OT-A   |
| 416 | Yes         | 7       | 7-A  | 100    | McF_4 | Inf | last   | wholeT_0.01 | DiP, DiP-A, OT, OT-A   |
| 417 | Yes         | 7       | 7-A  | 100    | McF_4 | Inf | last   | wholeT_0.5  | DiP, DiP-A, OT, OT-A   |
| 418 | Yes         | 7       | 7-A  | 100    | McF_4 | Inf | unif   | singleC     | DiP, DiP-A, OT, OT-A   |
| 419 | Yes         | 7       | 7-A  | 100    | McF_4 | Inf | unif   | wholeT_0.01 | DiP, DiP-A             |
| 420 | Yes         | 7       | 7-A  | 100    | McF_4 | Inf | unif   | wholeT_0.5  | DiP, DiP-A, OT, OT-A   |
| 421 | Yes         | 7       | 7-A  | 100    | McF_6 | 0   | last   | singleC     | DiP, DiP-A, OT, OT-A   |
| 422 | Yes         | 7       | 7-A  | 100    | McF_6 | 0   | last   | wholeT_0.01 | DiP, OT, OT-A          |
| 423 | Yes         | 7       | 7-A  | 100    | McF_6 | 0   | last   | wholeT_0.5  | DiP, OT, OT-A          |
| 424 | Yes         | 7       | 7-A  | 100    | McF_6 | 0   | unif   | singleC     | CBN, CBN-A, DiP, DiP-A |
| 425 | Yes         | 7       | 7-A  | 100    | McF_6 | 0   | unif   | wholeT_0.01 | CBN, CBN-A, DiP, DiP-A |
| 426 | Yes         | 7       | 7-A  | 100    | McF_6 | 0   | unif   | wholeT_0.5  | CBN, CBN-A, DiP, DiP-A |
| 427 | Yes         | 7       | 7-A  | 100    | McF_6 | Inf | last   | singleC     | DiP, DiP-A, OT, OT-A   |
| 428 | Yes         | 7       | 7-A  | 100    | McF_6 | Inf | last   | wholeT_0.01 | DiP, OT, OT-A          |
| 429 | Yes         | 7       | 7-A  | 100    | McF_6 | Inf | last   | wholeT_0.5  | DiP, DiP-A, OT, OT-A   |
| 430 | Yes         | 7       | 7-A  | 100    | McF_6 | Inf | unif   | singleC     | CBN, CBN-A, DiP, DiP-A |
| 431 | Yes         | 7       | 7-A  | 100    | McF_6 | Inf | unif   | wholeT_0.01 | CBN, CBN-A, DiP, DiP-A |
| 432 | Yes         | 7       | 7-A  | 100    | McF_6 | Inf | unif   | wholeT_0.5  | CBN, CBN-A, DiP, DiP-A |
| 433 | No          | 11      | 11-B | 1000   | Bozic | 0   | last   | singleC     | OT, OT-A               |
| 434 | No          | 11      | 11-B | 1000   | Bozic | 0   | last   | wholeT_0.01 | DiP, DiP-A             |
| 435 | No          | 11      | 11-B | 1000   | Bozic | 0   | last   | wholeT_0.5  | DiP, DiP-A, OT, OT-A   |
| 436 | No          | 11      | 11-B | 1000   | Bozic | 0   | unif   | singleC     | DiP, DiP-A, OT, OT-A   |
| 437 | No          | 11      | 11-B | 1000   | Bozic | 0   | unif   | wholeT_0.01 | DiP, DiP-A             |

Table 4: (continued)

|     | Conjunction | Drivers | Tree | S.Size | Model | sh  | S.Time | S.Type      | Best method(s)       |
|-----|-------------|---------|------|--------|-------|-----|--------|-------------|----------------------|
| 438 | No          | 11      | 11-B | 1000   | Bozic | 0   | unif   | wholeT_0.5  | DiP, DiP-A           |
| 439 | No          | 11      | 11-B | 1000   | Bozic | Inf | last   | singleC     | OT, OT-A             |
| 440 | No          | 11      | 11-B | 1000   | Bozic | Inf | last   | wholeT_0.01 | DiP-A                |
| 441 | No          | 11      | 11-B | 1000   | Bozic | Inf | last   | wholeT_0.5  | OT, OT-A             |
| 442 | No          | 11      | 11-B | 1000   | Bozic | Inf | unif   | singleC     | DiP, DiP-A           |
| 443 | No          | 11      | 11-B | 1000   | Bozic | Inf | unif   | wholeT_0.01 | OT, OT-A             |
| 444 | No          | 11      | 11-B | 1000   | Bozic | Inf | unif   | wholeT_0.5  | DiP, DiP-A           |
| 445 | No          | 11      | 11-B | 1000   | exp   | 0   | last   | singleC     | DiP, DiP-A, OT, OT-A |
| 446 | No          | 11      | 11-B | 1000   | exp   | 0   | last   | wholeT_0.01 | DiP-A, OT, OT-A      |
| 447 | No          | 11      | 11-B | 1000   | exp   | 0   | last   | wholeT_0.5  | DiP, DiP-A, OT, OT-A |
| 448 | No          | 11      | 11-B | 1000   | exp   | 0   | unif   | singleC     | DiP, DiP-A, OT, OT-A |
| 449 | No          | 11      | 11-B | 1000   | exp   | 0   | unif   | wholeT_0.01 | DiP, DiP-A           |
| 450 | No          | 11      | 11-B | 1000   | exp   | 0   | unif   | wholeT_0.5  | DiP, DiP-A, OT, OT-A |
| 451 | No          | 11      | 11-B | 1000   | exp   | Inf | last   | singleC     | OT, OT-A             |
| 452 | No          | 11      | 11-B | 1000   | exp   | Inf | last   | wholeT_0.01 | OT, OT-A             |
| 453 | No          | 11      | 11-B | 1000   | exp   | Inf | last   | wholeT_0.5  | OT, OT-A             |
| 454 | No          | 11      | 11-B | 1000   | exp   | Inf | unif   | singleC     | DiP-A, OT, OT-A      |
| 455 | No          | 11      | 11-B | 1000   | exp   | Inf | unif   | wholeT_0.01 | DiP, DiP-A, OT, OT-A |
| 456 | No          | 11      | 11-B | 1000   | exp   | Inf | unif   | wholeT_0.5  | DiP, DiP-A, OT, OT-A |
| 457 | No          | 11      | 11-B | 1000   | McF_4 | 0   | last   | singleC     | DiP, DiP-A, OT, OT-A |
| 458 | No          | 11      | 11-B | 1000   | McF_4 | 0   | last   | wholeT_0.01 | DiP, DiP-A, OT, OT-A |
| 459 | No          | 11      | 11-B | 1000   | McF_4 | 0   | last   | wholeT_0.5  | DiP-A, OT, OT-A      |
| 460 | No          | 11      | 11-B | 1000   | McF_4 | 0   | unif   | singleC     | DiP, DiP-A           |
| 461 | No          | 11      | 11-B | 1000   | McF_4 | 0   | unif   | wholeT_0.01 | DiP-A, OT, OT-A      |
| 462 | No          | 11      | 11-B | 1000   | McF_4 | 0   | unif   | wholeT_0.5  | DiP, DiP-A, OT, OT-A |
| 463 | No          | 11      | 11-B | 1000   | McF_4 | Inf | last   | singleC     | OT, OT-A             |
| 464 | No          | 11      | 11-B | 1000   | McF_4 | Inf | last   | wholeT_0.01 | DiP, DiP-A, OT, OT-A |
| 465 | No          | 11      | 11-B | 1000   | McF_4 | Inf | last   | wholeT_0.5  | DiP-A, OT, OT-A      |
| 466 | No          | 11      | 11-B | 1000   | McF_4 | Inf | unif   | singleC     | DiP, DiP-A, OT, OT-A |
| 467 | No          | 11      | 11-B | 1000   | McF_4 | Inf | unif   | wholeT_0.01 | OT, OT-A             |
| 468 | No          | 11      | 11-B | 1000   | McF_4 | Inf | unif   | wholeT_0.5  | DiP, DiP-A, OT, OT-A |
| 469 | No          | 11      | 11-B | 1000   | McF_6 | 0   | last   | singleC     | DiP, OT              |
| 470 | No          | 11      | 11-B | 1000   | McF_6 | 0   | last   | wholeT_0.01 | DiP, OT              |
| 471 | No          | 11      | 11-B | 1000   | McF_6 | 0   | last   | wholeT_0.5  | DiP, OT              |
| 472 | No          | 11      | 11-B | 1000   | McF_6 | 0   | unif   | singleC     | DiP, DiP-A, OT, OT-A |
| 473 | No          | 11      | 11-B | 1000   | McF_6 | 0   | unif   | wholeT_0.01 | DiP, DiP-A, OT, OT-A |
| 474 | No          | 11      | 11-B | 1000   | McF_6 | 0   | unif   | wholeT_0.5  | DiP, DiP-A           |
| 475 | No          | 11      | 11-B | 1000   | McF_6 | Inf | last   | singleC     | DiP, OT              |
| 476 | No          | 11      | 11-B | 1000   | McF_6 | Inf | last   | wholeT_0.01 | DiP, OT              |
| 477 | No          | 11      | 11-B | 1000   | McF_6 | Inf | last   | wholeT_0.5  | DiP, OT              |

Table 4: (continued)

|     | Conjunction | Drivers | Tree | S.Size | Model | sh  | S.Time | S.Type      | Best method(s)       |
|-----|-------------|---------|------|--------|-------|-----|--------|-------------|----------------------|
| 478 | No          | 11      | 11-B | 1000   | McF_6 | Inf | unif   | singleC     | DiP, DiP-A           |
| 479 | No          | 11      | 11-B | 1000   | McF_6 | Inf | unif   | wholeT_0.01 | DiP, DiP-A           |
| 480 | No          | 11      | 11-B | 1000   | McF_6 | Inf | unif   | wholeT_0.5  | DiP, DiP-A           |
| 481 | No          | 11      | 11-B | 200    | Bozic | 0   | last   | singleC     | DiP, DiP-A, OT, OT-A |
| 482 | No          | 11      | 11-B | 200    | Bozic | 0   | last   | wholeT_0.01 | DiP                  |
| 483 | No          | 11      | 11-B | 200    | Bozic | 0   | last   | wholeT_0.5  | DiP, DiP-A, OT, OT-A |
| 484 | No          | 11      | 11-B | 200    | Bozic | 0   | unif   | singleC     | DiP, DiP-A, OT, OT-A |
| 485 | No          | 11      | 11-B | 200    | Bozic | 0   | unif   | wholeT_0.01 | DiP, DiP-A           |
| 486 | No          | 11      | 11-B | 200    | Bozic | 0   | unif   | wholeT_0.5  | DiP, DiP-A, OT, OT-A |
| 487 | No          | 11      | 11-B | 200    | Bozic | Inf | last   | singleC     | DiP, DiP-A, OT, OT-A |
| 488 | No          | 11      | 11-B | 200    | Bozic | Inf | last   | wholeT_0.01 | DiP, DiP-A, OT, OT-A |
| 489 | No          | 11      | 11-B | 200    | Bozic | Inf | last   | wholeT_0.5  | DiP, DiP-A, OT, OT-A |
| 490 | No          | 11      | 11-B | 200    | Bozic | Inf | unif   | singleC     | DiP, DiP-A           |
| 491 | No          | 11      | 11-B | 200    | Bozic | Inf | unif   | wholeT_0.01 | DiP, DiP-A           |
| 492 | No          | 11      | 11-B | 200    | Bozic | Inf | unif   | wholeT_0.5  | DiP, DiP-A           |
| 493 | No          | 11      | 11-B | 200    | exp   | 0   | last   | singleC     | DiP, DiP-A, OT, OT-A |
| 494 | No          | 11      | 11-B | 200    | exp   | 0   | last   | wholeT_0.01 | DiP, DiP-A, OT, OT-A |
| 495 | No          | 11      | 11-B | 200    | exp   | 0   | last   | wholeT_0.5  | DiP, DiP-A, OT, OT-A |
| 496 | No          | 11      | 11-B | 200    | exp   | 0   | unif   | singleC     | DiP, DiP-A, OT, OT-A |
| 497 | No          | 11      | 11-B | 200    | exp   | 0   | unif   | wholeT_0.01 | DiP, DiP-A, OT, OT-A |
| 498 | No          | 11      | 11-B | 200    | exp   | 0   | unif   | wholeT_0.5  | DiP, DiP-A, OT, OT-A |
| 499 | No          | 11      | 11-B | 200    | exp   | Inf | last   | singleC     | DiP, DiP-A, OT, OT-A |
| 500 | No          | 11      | 11-B | 200    | exp   | Inf | last   | wholeT_0.01 | DiP, OT, OT-A        |
| 501 | No          | 11      | 11-B | 200    | exp   | Inf | last   | wholeT_0.5  | DiP, DiP-A, OT, OT-A |
| 502 | No          | 11      | 11-B | 200    | exp   | Inf | unif   | singleC     | DiP, DiP-A, OT, OT-A |
| 503 | No          | 11      | 11-B | 200    | exp   | Inf | unif   | wholeT_0.01 | DiP, DiP-A           |
| 504 | No          | 11      | 11-B | 200    | exp   | Inf | unif   | wholeT_0.5  | DiP, DiP-A, OT, OT-A |
| 505 | No          | 11      | 11-B | 200    | McF_4 | 0   | last   | singleC     | DiP, DiP-A, OT, OT-A |
| 506 | No          | 11      | 11-B | 200    | McF_4 | 0   | last   | wholeT_0.01 | DiP, DiP-A, OT, OT-A |
| 507 | No          | 11      | 11-B | 200    | McF_4 | 0   | last   | wholeT_0.5  | DiP-A, OT, OT-A      |
| 508 | No          | 11      | 11-B | 200    | McF_4 | 0   | unif   | singleC     | DiP, DiP-A, OT, OT-A |
| 509 | No          | 11      | 11-B | 200    | McF_4 | 0   | unif   | wholeT_0.01 | DiP, DiP-A           |
| 510 | No          | 11      | 11-B | 200    | McF_4 | 0   | unif   | wholeT_0.5  | DiP, DiP-A, OT       |
| 511 | No          | 11      | 11-B | 200    | McF_4 | Inf | last   | singleC     | OT, OT-A             |
| 512 | No          | 11      | 11-B | 200    | McF_4 | Inf | last   | wholeT_0.01 | DiP, DiP-A, OT, OT-A |
| 513 | No          | 11      | 11-B | 200    | McF_4 | Inf | last   | wholeT_0.5  | DiP, DiP-A, OT, OT-A |
| 514 | No          | 11      | 11-B | 200    | McF_4 | Inf | unif   | singleC     | DiP, DiP-A, OT, OT-A |
| 515 | No          | 11      | 11-B | 200    | McF_4 | Inf | unif   | wholeT_0.01 | DiP, DiP-A, OT, OT-A |
| 516 | No          | 11      | 11-B | 200    | McF_4 | Inf | unif   | wholeT_0.5  | DiP, DiP-A, OT, OT-A |
| 517 | No          | 11      | 11-B | 200    | McF_6 | 0   | last   | singleC     | DiP, OT              |

Table 4: (continued)

|     | Conjunction | Drivers | Tree | S.Size | Model | sh  | S.Time | S.Type      | Best method(s)       |
|-----|-------------|---------|------|--------|-------|-----|--------|-------------|----------------------|
| 518 | No          | 11      | 11-B | 200    | McF_6 | 0   | last   | wholeT_0.01 | DiP, OT              |
| 519 | No          | 11      | 11-B | 200    | McF_6 | 0   | last   | wholeT_0.5  | DiP, OT              |
| 520 | No          | 11      | 11-B | 200    | McF_6 | 0   | unif   | singleC     | DiP, DiP-A, OT, OT-A |
| 521 | No          | 11      | 11-B | 200    | McF_6 | 0   | unif   | wholeT_0.01 | DiP, DiP-A, OT, OT-A |
| 522 | No          | 11      | 11-B | 200    | McF_6 | 0   | unif   | wholeT_0.5  | OT, OT-A             |
| 523 | No          | 11      | 11-B | 200    | McF_6 | Inf | last   | singleC     | DiP, OT              |
| 524 | No          | 11      | 11-B | 200    | McF_6 | Inf | last   | wholeT_0.01 | DiP, OT              |
| 525 | No          | 11      | 11-B | 200    | McF_6 | Inf | last   | wholeT_0.5  | DiP, OT              |
| 526 | No          | 11      | 11-B | 200    | McF_6 | Inf | unif   | singleC     | OT, OT-A             |
| 527 | No          | 11      | 11-B | 200    | McF_6 | Inf | unif   | wholeT_0.01 | OT, OT-A             |
| 528 | No          | 11      | 11-B | 200    | McF_6 | Inf | unif   | wholeT_0.5  | DiP, OT, OT-A        |
| 529 | No          | 11      | 11-B | 100    | Bozic | 0   | last   | singleC     | DiP, DiP-A, OT, OT-A |
| 530 | No          | 11      | 11-B | 100    | Bozic | 0   | last   | wholeT_0.01 | DiP, DiP-A           |
| 531 | No          | 11      | 11-B | 100    | Bozic | 0   | last   | wholeT_0.5  | DiP, DiP-A, OT, OT-A |
| 532 | No          | 11      | 11-B | 100    | Bozic | 0   | unif   | singleC     | DiP, DiP-A, OT, OT-A |
| 533 | No          | 11      | 11-B | 100    | Bozic | 0   | unif   | wholeT_0.01 | DiP, DiP-A           |
| 534 | No          | 11      | 11-B | 100    | Bozic | 0   | unif   | wholeT_0.5  | DiP, DiP-A, OT, OT-A |
| 535 | No          | 11      | 11-B | 100    | Bozic | Inf | last   | singleC     | DiP, DiP-A, OT, OT-A |
| 536 | No          | 11      | 11-B | 100    | Bozic | Inf | last   | wholeT_0.01 | DiP, DiP-A, OT, OT-A |
| 537 | No          | 11      | 11-B | 100    | Bozic | Inf | last   | wholeT_0.5  | DiP, DiP-A, OT, OT-A |
| 538 | No          | 11      | 11-B | 100    | Bozic | Inf | unif   | singleC     | DiP, DiP-A           |
| 539 | No          | 11      | 11-B | 100    | Bozic | Inf | unif   | wholeT_0.01 | DiP, DiP-A           |
| 540 | No          | 11      | 11-B | 100    | Bozic | Inf | unif   | wholeT_0.5  | DiP, DiP-A, OT, OT-A |
| 541 | No          | 11      | 11-B | 100    | exp   | 0   | last   | singleC     | DiP, DiP-A, OT, OT-A |
| 542 | No          | 11      | 11-B | 100    | exp   | 0   | last   | wholeT_0.01 | DiP, DiP-A           |
| 543 | No          | 11      | 11-B | 100    | exp   | 0   | last   | wholeT_0.5  | DiP, DiP-A, OT, OT-A |
| 544 | No          | 11      | 11-B | 100    | exp   | 0   | unif   | singleC     | DiP, DiP-A, OT, OT-A |
| 545 | No          | 11      | 11-B | 100    | exp   | 0   | unif   | wholeT_0.01 | DiP, DiP-A, OT, OT-A |
| 546 | No          | 11      | 11-B | 100    | exp   | 0   | unif   | wholeT_0.5  | DiP, DiP-A, OT, OT-A |
| 547 | No          | 11      | 11-B | 100    | exp   | Inf | last   | singleC     | DiP, DiP-A, OT, OT-A |
| 548 | No          | 11      | 11-B | 100    | exp   | Inf | last   | wholeT_0.01 | DiP, DiP-A           |
| 549 | No          | 11      | 11-B | 100    | exp   | Inf | last   | wholeT_0.5  | DiP, DiP-A, OT, OT-A |
| 550 | No          | 11      | 11-B | 100    | exp   | Inf | unif   | singleC     | DiP, DiP-A, OT, OT-A |
| 551 | No          | 11      | 11-B | 100    | exp   | Inf | unif   | wholeT_0.01 | DiP, DiP-A           |
| 552 | No          | 11      | 11-B | 100    | exp   | Inf | unif   | wholeT_0.5  | DiP, DiP-A, OT, OT-A |
| 553 | No          | 11      | 11-B | 100    | McF_4 | 0   | last   | singleC     | DiP, DiP-A           |
| 554 | No          | 11      | 11-B | 100    | McF_4 | 0   | last   | wholeT_0.01 | DiP, DiP-A, OT, OT-A |
| 555 | No          | 11      | 11-B | 100    | McF_4 | 0   | last   | wholeT_0.5  | DiP, DiP-A, OT, OT-A |
| 556 | No          | 11      | 11-B | 100    | McF_4 | 0   | unif   | singleC     | DiP, DiP-A           |
| 557 | No          | 11      | 11-B | 100    | McF_4 | 0   | unif   | wholeT_0.01 | DiP, DiP-A           |

Table 4: (continued)

|     | Conjunction | Drivers | Tree | S.Size | Model | sh  | S.Time | S.Type      | Best method(s)              |
|-----|-------------|---------|------|--------|-------|-----|--------|-------------|-----------------------------|
| 558 | No          | 11      | 11-B | 100    | McF_4 | 0   | unif   | wholeT_0.5  | DiP, DiP-A, OT, OT-A        |
| 559 | No          | 11      | 11-B | 100    | McF_4 | Inf | last   | singleC     | DiP, DiP-A, OT, OT-A        |
| 560 | No          | 11      | 11-B | 100    | McF_4 | Inf | last   | wholeT_0.01 | DiP, DiP-A, OT, OT-A        |
| 561 | No          | 11      | 11-B | 100    | McF_4 | Inf | last   | wholeT_0.5  | DiP, DiP-A, OT, OT-A        |
| 562 | No          | 11      | 11-B | 100    | McF_4 | Inf | unif   | singleC     | DiP, DiP-A, OT, OT-A        |
| 563 | No          | 11      | 11-B | 100    | McF_4 | Inf | unif   | wholeT_0.01 | DiP, DiP-A, OT, OT-A        |
| 564 | No          | 11      | 11-B | 100    | McF_4 | Inf | unif   | wholeT_0.5  | DiP, DiP-A, OT, OT-A        |
| 565 | No          | 11      | 11-B | 100    | McF_6 | 0   | last   | singleC     | DiP, OT                     |
| 566 | No          | 11      | 11-B | 100    | McF_6 | 0   | last   | wholeT_0.01 | DiP, OT                     |
| 567 | No          | 11      | 11-B | 100    | McF_6 | 0   | last   | wholeT_0.5  | DiP, OT                     |
| 568 | No          | 11      | 11-B | 100    | McF_6 | 0   | unif   | singleC     | DiP, DiP-A                  |
| 569 | No          | 11      | 11-B | 100    | McF_6 | 0   | unif   | wholeT_0.01 | DiP, DiP-A, OT, OT-A        |
| 570 | No          | 11      | 11-B | 100    | McF_6 | 0   | unif   | wholeT_0.5  | DiP, DiP-A, OT, OT-A        |
| 571 | No          | 11      | 11-B | 100    | McF_6 | Inf | last   | singleC     | DiP, OT                     |
| 572 | No          | 11      | 11-B | 100    | McF_6 | Inf | last   | wholeT_0.01 | DiP, OT                     |
| 573 | No          | 11      | 11-B | 100    | McF_6 | Inf | last   | wholeT_0.5  | DiP, OT                     |
| 574 | No          | 11      | 11-B | 100    | McF_6 | Inf | unif   | singleC     | DiP, DiP-A, OT, OT-A        |
| 575 | No          | 11      | 11-B | 100    | McF_6 | Inf | unif   | wholeT_0.01 | DiP, DiP-A, OT, OT-A        |
| 576 | No          | 11      | 11-B | 100    | McF_6 | Inf | unif   | wholeT_0.5  | DiP, DiP-A, OT, OT-A        |
| 577 | No          | 9       | 9-B  | 1000   | Bozic | 0   | last   | singleC     | DiP-A, OT, OT-A             |
| 578 | No          | 9       | 9-B  | 1000   | Bozic | 0   | last   | wholeT_0.01 | DiP, DiP-A                  |
| 579 | No          | 9       | 9-B  | 1000   | Bozic | 0   | last   | wholeT_0.5  | DiP, DiP-A, OT, OT-A        |
| 580 | No          | 9       | 9-B  | 1000   | Bozic | 0   | unif   | singleC     | DiP, DiP-A, OT, OT-A        |
| 581 | No          | 9       | 9-B  | 1000   | Bozic | 0   | unif   | wholeT_0.01 | DiP, DiP-A, OT, OT-A        |
| 582 | No          | 9       | 9-B  | 1000   | Bozic | 0   | unif   | wholeT_0.5  | DiP, DiP-A                  |
| 583 | No          | 9       | 9-B  | 1000   | Bozic | Inf | last   | singleC     | OT, OT-A                    |
| 584 | No          | 9       | 9-B  | 1000   | Bozic | Inf | last   | wholeT_0.01 | DiP, DiP-A                  |
| 585 | No          | 9       | 9-B  | 1000   | Bozic | Inf | last   | wholeT_0.5  | OT, OT-A                    |
| 586 | No          | 9       | 9-B  | 1000   | Bozic | Inf | unif   | singleC     | DiP, DiP-A                  |
| 587 | No          | 9       | 9-B  | 1000   | Bozic | Inf | unif   | wholeT_0.01 | DiP, DiP-A, OT, OT-A        |
| 588 | No          | 9       | 9-B  | 1000   | Bozic | Inf | unif   | wholeT_0.5  | DiP, DiP-A, OT, OT-A        |
| 589 | No          | 9       | 9-B  | 1000   | exp   | 0   | last   | singleC     | DiP, DiP-A, OT, OT-A        |
| 590 | No          | 9       | 9-B  | 1000   | exp   | 0   | last   | wholeT_0.01 | DiP-A, OT, OT-A             |
| 591 | No          | 9       | 9-B  | 1000   | exp   | 0   | last   | wholeT_0.5  | DiP, DiP-A, OT, OT-A        |
| 592 | No          | 9       | 9-B  | 1000   | exp   | 0   | unif   | singleC     | DiP, DiP-A, OT, OT-A        |
| 593 | No          | 9       | 9-B  | 1000   | exp   | 0   | unif   | wholeT_0.01 | DiP, DiP-A                  |
| 594 | No          | 9       | 9-B  | 1000   | exp   | 0   | unif   | wholeT_0.5  | DiP, DiP-A, OT, OT-A        |
| 595 | No          | 9       | 9-B  | 1000   | exp   | Inf | last   | singleC     | DiP, DiP-A, OT, OT-A        |
| 596 | No          | 9       | 9-B  | 1000   | exp   | Inf | last   | wholeT_0.01 | CBN-A, DiP, DiP-A, OT, OT-A |
| 597 | No          | 9       | 9-B  | 1000   | exp   | Inf | last   | wholeT_0.5  | DiP, DiP-A, OT, OT-A        |

Table 4: (continued)

|     | Conjunction | Drivers | Tree | S.Size | Model | sh  | S.Time | S.Type      | Best method(s)       |
|-----|-------------|---------|------|--------|-------|-----|--------|-------------|----------------------|
| 598 | No          | 9       | 9-B  | 1000   | exp   | Inf | unif   | singleC     | DiP, DiP-A, OT, OT-A |
| 599 | No          | 9       | 9-B  | 1000   | exp   | Inf | unif   | wholeT_0.01 | DiP-A, OT, OT-A      |
| 600 | No          | 9       | 9-B  | 1000   | exp   | Inf | unif   | wholeT_0.5  | DiP, DiP-A, OT, OT-A |
| 601 | No          | 9       | 9-B  | 1000   | McF_4 | 0   | last   | singleC     | DiP-A, OT, OT-A      |
| 602 | No          | 9       | 9-B  | 1000   | McF_4 | 0   | last   | wholeT_0.01 | DiP, DiP-A, OT, OT-A |
| 603 | No          | 9       | 9-B  | 1000   | McF_4 | 0   | last   | wholeT_0.5  | OT, OT-A             |
| 604 | No          | 9       | 9-B  | 1000   | McF_4 | 0   | unif   | singleC     | DiP, DiP-A, OT, OT-A |
| 605 | No          | 9       | 9-B  | 1000   | McF_4 | 0   | unif   | wholeT_0.01 | DiP, DiP-A, OT, OT-A |
| 606 | No          | 9       | 9-B  | 1000   | McF_4 | 0   | unif   | wholeT_0.5  | DiP, DiP-A, OT, OT-A |
| 607 | No          | 9       | 9-B  | 1000   | McF_4 | Inf | last   | singleC     | OT, OT-A             |
| 608 | No          | 9       | 9-B  | 1000   | McF_4 | Inf | last   | wholeT_0.01 | DiP, DiP-A, OT, OT-A |
| 609 | No          | 9       | 9-B  | 1000   | McF_4 | Inf | last   | wholeT_0.5  | DiP, DiP-A, OT, OT-A |
| 610 | No          | 9       | 9-B  | 1000   | McF_4 | Inf | unif   | singleC     | DiP, DiP-A, OT, OT-A |
| 611 | No          | 9       | 9-B  | 1000   | McF_4 | Inf | unif   | wholeT_0.01 | DiP-A, OT, OT-A      |
| 612 | No          | 9       | 9-B  | 1000   | McF_4 | Inf | unif   | wholeT_0.5  | DiP, DiP-A, OT, OT-A |
| 613 | No          | 9       | 9-B  | 1000   | McF_6 | 0   | last   | singleC     | DiP, OT              |
| 614 | No          | 9       | 9-B  | 1000   | McF_6 | 0   | last   | wholeT_0.01 | DiP, OT              |
| 615 | No          | 9       | 9-B  | 1000   | McF_6 | 0   | last   | wholeT_0.5  | DiP, OT              |
| 616 | No          | 9       | 9-B  | 1000   | McF_6 | 0   | unif   | singleC     | DiP, DiP-A, OT, OT-A |
| 617 | No          | 9       | 9-B  | 1000   | McF_6 | 0   | unif   | wholeT_0.01 | DiP, DiP-A, OT, OT-A |
| 618 | No          | 9       | 9-B  | 1000   | McF_6 | 0   | unif   | wholeT_0.5  | DiP, DiP-A, OT, OT-A |
| 619 | No          | 9       | 9-B  | 1000   | McF_6 | Inf | last   | singleC     | DiP, OT              |
| 620 | No          | 9       | 9-B  | 1000   | McF_6 | Inf | last   | wholeT_0.01 | DiP, OT              |
| 621 | No          | 9       | 9-B  | 1000   | McF_6 | Inf | last   | wholeT_0.5  | DiP, OT              |
| 622 | No          | 9       | 9-B  | 1000   | McF_6 | Inf | unif   | singleC     | DiP, DiP-A, OT, OT-A |
| 623 | No          | 9       | 9-B  | 1000   | McF_6 | Inf | unif   | wholeT_0.01 | DiP, DiP-A, OT, OT-A |
| 624 | No          | 9       | 9-B  | 1000   | McF_6 | Inf | unif   | wholeT_0.5  | DiP, DiP-A, OT, OT-A |
| 625 | No          | 9       | 9-B  | 200    | Bozic | 0   | last   | singleC     | DiP, DiP-A, OT, OT-A |
| 626 | No          | 9       | 9-B  | 200    | Bozic | 0   | last   | wholeT_0.01 | DiP, DiP-A           |
| 627 | No          | 9       | 9-B  | 200    | Bozic | 0   | last   | wholeT_0.5  | DiP, DiP-A, OT, OT-A |
| 628 | No          | 9       | 9-B  | 200    | Bozic | 0   | unif   | singleC     | DiP, DiP-A, OT, OT-A |
| 629 | No          | 9       | 9-B  | 200    | Bozic | 0   | unif   | wholeT_0.01 | DiP, DiP-A           |
| 630 | No          | 9       | 9-B  | 200    | Bozic | 0   | unif   | wholeT_0.5  | DiP, DiP-A, OT, OT-A |
| 631 | No          | 9       | 9-B  | 200    | Bozic | Inf | last   | singleC     | DiP, DiP-A, OT, OT-A |
| 632 | No          | 9       | 9-B  | 200    | Bozic | Inf | last   | wholeT_0.01 | DiP, DiP-A, OT, OT-A |
| 633 | No          | 9       | 9-B  | 200    | Bozic | Inf | last   | wholeT_0.5  | DiP, DiP-A, OT, OT-A |
| 634 | No          | 9       | 9-B  | 200    | Bozic | Inf | unif   | singleC     | DiP, DiP-A, OT, OT-A |
| 635 | No          | 9       | 9-B  | 200    | Bozic | Inf | unif   | wholeT_0.01 | DiP, DiP-A, OT, OT-A |
| 636 | No          | 9       | 9-B  | 200    | Bozic | Inf | unif   | wholeT_0.5  | DiP, DiP-A           |
| 637 | No          | 9       | 9-B  | 200    | exp   | 0   | last   | singleC     | DiP, DiP-A, OT, OT-A |

Table 4: (continued)

|     | Conjunction | Drivers | Tree | S.Size | Model | sh  | S.Time | S.Type      | Best method(s)       |
|-----|-------------|---------|------|--------|-------|-----|--------|-------------|----------------------|
| 638 | No          | 9       | 9-B  | 200    | exp   | 0   | last   | wholeT_0.01 | DiP, DiP-A           |
| 639 | No          | 9       | 9-B  | 200    | exp   | 0   | last   | wholeT_0.5  | DiP, DiP-A, OT, OT-A |
| 640 | No          | 9       | 9-B  | 200    | exp   | 0   | unif   | singleC     | DiP, DiP-A, OT, OT-A |
| 641 | No          | 9       | 9-B  | 200    | exp   | 0   | unif   | wholeT_0.01 | DiP, DiP-A, OT, OT-A |
| 642 | No          | 9       | 9-B  | 200    | exp   | 0   | unif   | wholeT_0.5  | DiP, DiP-A, OT, OT-A |
| 643 | No          | 9       | 9-B  | 200    | exp   | Inf | last   | singleC     | DiP, DiP-A, OT, OT-A |
| 644 | No          | 9       | 9-B  | 200    | exp   | Inf | last   | wholeT_0.01 | DiP, DiP-A           |
| 645 | No          | 9       | 9-B  | 200    | exp   | Inf | last   | wholeT_0.5  | DiP, DiP-A, OT, OT-A |
| 646 | No          | 9       | 9-B  | 200    | exp   | Inf | unif   | singleC     | DiP, DiP-A, OT, OT-A |
| 647 | No          | 9       | 9-B  | 200    | exp   | Inf | unif   | wholeT_0.01 | DiP, DiP-A, OT, OT-A |
| 648 | No          | 9       | 9-B  | 200    | exp   | Inf | unif   | wholeT_0.5  | DiP, DiP-A, OT, OT-A |
| 649 | No          | 9       | 9-B  | 200    | McF_4 | 0   | last   | singleC     | OT, OT-A             |
| 650 | No          | 9       | 9-B  | 200    | McF_4 | 0   | last   | wholeT_0.01 | DiP, DiP-A, OT, OT-A |
| 651 | No          | 9       | 9-B  | 200    | McF_4 | 0   | last   | wholeT_0.5  | DiP-A, OT, OT-A      |
| 652 | No          | 9       | 9-B  | 200    | McF_4 | 0   | unif   | singleC     | DiP, DiP-A, OT, OT-A |
| 653 | No          | 9       | 9-B  | 200    | McF_4 | 0   | unif   | wholeT_0.01 | DiP, DiP-A           |
| 654 | No          | 9       | 9-B  | 200    | McF_4 | 0   | unif   | wholeT_0.5  | DiP, DiP-A, OT, OT-A |
| 655 | No          | 9       | 9-B  | 200    | McF_4 | Inf | last   | singleC     | OT, OT-A             |
| 656 | No          | 9       | 9-B  | 200    | McF_4 | Inf | last   | wholeT_0.01 | OT, OT-A             |
| 657 | No          | 9       | 9-B  | 200    | McF_4 | Inf | last   | wholeT_0.5  | DiP, DiP-A, OT, OT-A |
| 658 | No          | 9       | 9-B  | 200    | McF_4 | Inf | unif   | singleC     | DiP, DiP-A, OT, OT-A |
| 659 | No          | 9       | 9-B  | 200    | McF_4 | Inf | unif   | wholeT_0.01 | DiP, DiP-A, OT, OT-A |
| 660 | No          | 9       | 9-B  | 200    | McF_4 | Inf | unif   | wholeT_0.5  | DiP, DiP-A, OT, OT-A |
| 661 | No          | 9       | 9-B  | 200    | McF_6 | 0   | last   | singleC     | DiP, OT              |
| 662 | No          | 9       | 9-B  | 200    | McF_6 | 0   | last   | wholeT_0.01 | DiP, OT              |
| 663 | No          | 9       | 9-B  | 200    | McF_6 | 0   | last   | wholeT_0.5  | DiP, OT              |
| 664 | No          | 9       | 9-B  | 200    | McF_6 | 0   | unif   | singleC     | DiP, DiP-A, OT, OT-A |
| 665 | No          | 9       | 9-B  | 200    | McF_6 | 0   | unif   | wholeT_0.01 | DiP, DiP-A, OT, OT-A |
| 666 | No          | 9       | 9-B  | 200    | McF_6 | 0   | unif   | wholeT_0.5  | DiP, OT, OT-A        |
| 667 | No          | 9       | 9-B  | 200    | McF_6 | Inf | last   | singleC     | DiP, OT              |
| 668 | No          | 9       | 9-B  | 200    | McF_6 | Inf | last   | wholeT_0.01 | DiP, OT              |
| 669 | No          | 9       | 9-B  | 200    | McF_6 | Inf | last   | wholeT_0.5  | DiP, OT              |
| 670 | No          | 9       | 9-B  | 200    | McF_6 | Inf | unif   | singleC     | DiP, OT, OT-A        |
| 671 | No          | 9       | 9-B  | 200    | McF_6 | Inf | unif   | wholeT_0.01 | OT, OT-A             |
| 672 | No          | 9       | 9-B  | 200    | McF_6 | Inf | unif   | wholeT_0.5  | OT, OT-A             |
| 673 | No          | 9       | 9-B  | 100    | Bozic | 0   | last   | singleC     | DiP, DiP-A, OT, OT-A |
| 674 | No          | 9       | 9-B  | 100    | Bozic | 0   | last   | wholeT_0.01 | DiP, DiP-A           |
| 675 | No          | 9       | 9-B  | 100    | Bozic | 0   | last   | wholeT_0.5  | DiP, DiP-A, OT, OT-A |
| 676 | No          | 9       | 9-B  | 100    | Bozic | 0   | unif   | singleC     | DiP, DiP-A, OT, OT-A |
| 677 | No          | 9       | 9-B  | 100    | Bozic | 0   | unif   | wholeT_0.01 | DiP, DiP-A           |

Table 4: (continued)

|     | Conjunction | Drivers | Tree | S.Size | Model | sh  | S.Time | S.Type      | Best method(s)       |
|-----|-------------|---------|------|--------|-------|-----|--------|-------------|----------------------|
| 678 | No          | 9       | 9-B  | 100    | Bozic | 0   | unif   | wholeT_0.5  | DiP, DiP-A, OT, OT-A |
| 679 | No          | 9       | 9-B  | 100    | Bozic | Inf | last   | singleC     | DiP, DiP-A, OT, OT-A |
| 680 | No          | 9       | 9-B  | 100    | Bozic | Inf | last   | wholeT_0.01 | DiP, DiP-A           |
| 681 | No          | 9       | 9-B  | 100    | Bozic | Inf | last   | wholeT_0.5  | DiP, DiP-A, OT, OT-A |
| 682 | No          | 9       | 9-B  | 100    | Bozic | Inf | unif   | singleC     | DiP, DiP-A, OT, OT-A |
| 683 | No          | 9       | 9-B  | 100    | Bozic | Inf | unif   | wholeT_0.01 | DiP, DiP-A, OT, OT-A |
| 684 | No          | 9       | 9-B  | 100    | Bozic | Inf | unif   | wholeT_0.5  | DiP, DiP-A           |
| 685 | No          | 9       | 9-B  | 100    | exp   | 0   | last   | singleC     | DiP, DiP-A, OT, OT-A |
| 686 | No          | 9       | 9-B  | 100    | exp   | 0   | last   | wholeT_0.01 | DiP, DiP-A, OT, OT-A |
| 687 | No          | 9       | 9-B  | 100    | exp   | 0   | last   | wholeT_0.5  | DiP, DiP-A, OT, OT-A |
| 688 | No          | 9       | 9-B  | 100    | exp   | 0   | unif   | singleC     | DiP, DiP-A, OT, OT-A |
| 689 | No          | 9       | 9-B  | 100    | exp   | 0   | unif   | wholeT_0.01 | DiP, DiP-A, OT, OT-A |
| 690 | No          | 9       | 9-B  | 100    | exp   | 0   | unif   | wholeT_0.5  | DiP, DiP-A, OT, OT-A |
| 691 | No          | 9       | 9-B  | 100    | exp   | Inf | last   | singleC     | DiP, DiP-A, OT, OT-A |
| 692 | No          | 9       | 9-B  | 100    | exp   | Inf | last   | wholeT_0.01 | DiP, DiP-A           |
| 693 | No          | 9       | 9-B  | 100    | exp   | Inf | last   | wholeT_0.5  | DiP, DiP-A, OT, OT-A |
| 694 | No          | 9       | 9-B  | 100    | exp   | Inf | unif   | singleC     | DiP, DiP-A           |
| 695 | No          | 9       | 9-B  | 100    | exp   | Inf | unif   | wholeT_0.01 | DiP, DiP-A, OT, OT-A |
| 696 | No          | 9       | 9-B  | 100    | exp   | Inf | unif   | wholeT_0.5  | DiP, DiP-A, OT, OT-A |
| 697 | No          | 9       | 9-B  | 100    | McF_4 | 0   | last   | singleC     | DiP, DiP-A, OT, OT-A |
| 698 | No          | 9       | 9-B  | 100    | McF_4 | 0   | last   | wholeT_0.01 | DiP, DiP-A, OT, OT-A |
| 699 | No          | 9       | 9-B  | 100    | McF_4 | 0   | last   | wholeT_0.5  | DiP, DiP-A, OT, OT-A |
| 700 | No          | 9       | 9-B  | 100    | McF_4 | 0   | unif   | singleC     | DiP, DiP-A, OT, OT-A |
| 701 | No          | 9       | 9-B  | 100    | McF_4 | 0   | unif   | wholeT_0.01 | DiP, DiP-A           |
| 702 | No          | 9       | 9-B  | 100    | McF_4 | 0   | unif   | wholeT_0.5  | DiP, DiP-A, OT, OT-A |
| 703 | No          | 9       | 9-B  | 100    | McF_4 | Inf | last   | singleC     | DiP, DiP-A, OT, OT-A |
| 704 | No          | 9       | 9-B  | 100    | McF_4 | Inf | last   | wholeT_0.01 | DiP, DiP-A, OT, OT-A |
| 705 | No          | 9       | 9-B  | 100    | McF_4 | Inf | last   | wholeT_0.5  | DiP, DiP-A, OT, OT-A |
| 706 | No          | 9       | 9-B  | 100    | McF_4 | Inf | unif   | singleC     | DiP, DiP-A, OT, OT-A |
| 707 | No          | 9       | 9-B  | 100    | McF_4 | Inf | unif   | wholeT_0.01 | DiP, DiP-A, OT, OT-A |
| 708 | No          | 9       | 9-B  | 100    | McF_4 | Inf | unif   | wholeT_0.5  | DiP, DiP-A, OT, OT-A |
| 709 | No          | 9       | 9-B  | 100    | McF_6 | 0   | last   | singleC     | DiP, DiP-A, OT       |
| 710 | No          | 9       | 9-B  | 100    | McF_6 | 0   | last   | wholeT_0.01 | DiP, OT              |
| 711 | No          | 9       | 9-B  | 100    | McF_6 | 0   | last   | wholeT_0.5  | DiP, OT              |
| 712 | No          | 9       | 9-B  | 100    | McF_6 | 0   | unif   | singleC     | DiP, DiP-A, OT, OT-A |
| 713 | No          | 9       | 9-B  | 100    | McF_6 | 0   | unif   | wholeT_0.01 | DiP, DiP-A, OT, OT-A |
| 714 | No          | 9       | 9-B  | 100    | McF_6 | 0   | unif   | wholeT_0.5  | DiP, DiP-A, OT, OT-A |
| 715 | No          | 9       | 9-B  | 100    | McF_6 | Inf | last   | singleC     | DiP, DiP-A, OT       |
| 716 | No          | 9       | 9-B  | 100    | McF_6 | Inf | last   | wholeT_0.01 | DiP, OT              |
| 717 | No          | 9       | 9-B  | 100    | McF_6 | Inf | last   | wholeT_0.5  | DiP, DiP-A, OT       |



Table 4: (continued)

|     | Conjunction | Drivers | Tree | S.Size | Model | sh  | S.Time | S.Type      | Best method(s)                   |
|-----|-------------|---------|------|--------|-------|-----|--------|-------------|----------------------------------|
| 718 | No          | 9       | 9-B  | 100    | McF_6 | Inf | unif   | singleC     | DiP, DiP-A, OT, OT-A             |
| 719 | No          | 9       | 9-B  | 100    | McF_6 | Inf | unif   | wholeT_0.01 | DiP, DiP-A, OT, OT-A             |
| 720 | No          | 9       | 9-B  | 100    | McF_6 | Inf | unif   | wholeT_0.5  | DiP, DiP-A, OT, OT-A             |
| 721 | No          | 7       | 7-B  | 1000   | Bozic | 0   | last   | singleC     | DiP, DiP-A, OT, OT-A             |
| 722 | No          | 7       | 7-B  | 1000   | Bozic | 0   | last   | wholeT_0.01 | DiP, DiP-A, OT, OT-A             |
| 723 | No          | 7       | 7-B  | 1000   | Bozic | 0   | last   | wholeT_0.5  | DiP, DiP-A, OT, OT-A             |
| 724 | No          | 7       | 7-B  | 1000   | Bozic | 0   | unif   | singleC     | DiP, DiP-A, OT, OT-A             |
| 725 | No          | 7       | 7-B  | 1000   | Bozic | 0   | unif   | wholeT_0.01 | CBN-A, DiP, DiP-A, OT, OT-A      |
| 726 | No          | 7       | 7-B  | 1000   | Bozic | 0   | unif   | wholeT_0.5  | DiP, DiP-A, OT, OT-A             |
| 727 | No          | 7       | 7-B  | 1000   | Bozic | Inf | last   | singleC     | DiP, DiP-A, OT, OT-A             |
| 728 | No          | 7       | 7-B  | 1000   | Bozic | Inf | last   | wholeT_0.01 | CBN, CBN-A, DiP, DiP-A, OT, OT-A |
| 729 | No          | 7       | 7-B  | 1000   | Bozic | Inf | last   | wholeT_0.5  | DiP-A, OT, OT-A                  |
| 730 | No          | 7       | 7-B  | 1000   | Bozic | Inf | unif   | singleC     | CBN, CBN-A, DiP                  |
| 731 | No          | 7       | 7-B  | 1000   | Bozic | Inf | unif   | wholeT_0.01 | CBN, CBN-A, OT, OT-A             |
| 732 | No          | 7       | 7-B  | 1000   | Bozic | Inf | unif   | wholeT_0.5  | CBN, CBN-A, DiP, DiP-A           |
| 733 | No          | 7       | 7-B  | 1000   | exp   | 0   | last   | singleC     | DiP, DiP-A, OT, OT-A             |
| 734 | No          | 7       | 7-B  | 1000   | exp   | 0   | last   | wholeT_0.01 | DiP, DiP-A, OT, OT-A             |
| 735 | No          | 7       | 7-B  | 1000   | exp   | 0   | last   | wholeT_0.5  | DiP, DiP-A, OT, OT-A             |
| 736 | No          | 7       | 7-B  | 1000   | exp   | 0   | unif   | singleC     | DiP, DiP-A, OT, OT-A             |
| 737 | No          | 7       | 7-B  | 1000   | exp   | 0   | unif   | wholeT_0.01 | DiP, DiP-A                       |
| 738 | No          | 7       | 7-B  | 1000   | exp   | 0   | unif   | wholeT_0.5  | DiP, DiP-A, OT, OT-A             |
| 739 | No          | 7       | 7-B  | 1000   | exp   | Inf | last   | singleC     | DiP, DiP-A, OT, OT-A             |
| 740 | No          | 7       | 7-B  | 1000   | exp   | Inf | last   | wholeT_0.01 | CBN, CBN-A, OT, OT-A             |
| 741 | No          | 7       | 7-B  | 1000   | exp   | Inf | last   | wholeT_0.5  | DiP, DiP-A, OT, OT-A             |
| 742 | No          | 7       | 7-B  | 1000   | exp   | Inf | unif   | singleC     | DiP, DiP-A                       |
| 743 | No          | 7       | 7-B  | 1000   | exp   | Inf | unif   | wholeT_0.01 | CBN, CBN-A, DiP, DiP-A, OT, OT-A |
| 744 | No          | 7       | 7-B  | 1000   | exp   | Inf | unif   | wholeT_0.5  | DiP, DiP-A                       |
| 745 | No          | 7       | 7-B  | 1000   | McF_4 | 0   | last   | singleC     | DiP, DiP-A, OT, OT-A             |
| 746 | No          | 7       | 7-B  | 1000   | McF_4 | 0   | last   | wholeT_0.01 | DiP, DiP-A, OT, OT-A             |
| 747 | No          | 7       | 7-B  | 1000   | McF_4 | 0   | last   | wholeT_0.5  | DiP, DiP-A, OT, OT-A             |
| 748 | No          | 7       | 7-B  | 1000   | McF_4 | 0   | unif   | singleC     | DiP, DiP-A, OT, OT-A             |
| 749 | No          | 7       | 7-B  | 1000   | McF_4 | 0   | unif   | wholeT_0.01 | DiP, DiP-A, OT, OT-A             |
| 750 | No          | 7       | 7-B  | 1000   | McF_4 | 0   | unif   | wholeT_0.5  | DiP, DiP-A, OT, OT-A             |
| 751 | No          | 7       | 7-B  | 1000   | McF_4 | Inf | last   | singleC     | DiP, DiP-A, OT, OT-A             |
| 752 | No          | 7       | 7-B  | 1000   | McF_4 | Inf | last   | wholeT_0.01 | DiP, DiP-A, OT, OT-A             |
| 753 | No          | 7       | 7-B  | 1000   | McF_4 | Inf | last   | wholeT_0.5  | DiP, DiP-A, OT, OT-A             |
| 754 | No          | 7       | 7-B  | 1000   | McF_4 | Inf | unif   | singleC     | DiP, DiP-A, OT, OT-A             |
| 755 | No          | 7       | 7-B  | 1000   | McF_4 | Inf | unif   | wholeT_0.01 | DiP, DiP-A, OT, OT-A             |
| 756 | No          | 7       | 7-B  | 1000   | McF_4 | Inf | unif   | wholeT_0.5  | DiP, DiP-A, OT, OT-A             |
| 757 | No          | 7       | 7-B  | 1000   | McF_6 | 0   | last   | singleC     | DiP, DiP-A, OT, OT-A             |

Table 4: (continued)

|     | Conjunction | Drivers | Tree | S.Size | Model | sh  | S.Time | S.Type      | Best method(s)                   |
|-----|-------------|---------|------|--------|-------|-----|--------|-------------|----------------------------------|
| 758 | No          | 7       | 7-B  | 1000   | McF_6 | 0   | last   | wholeT_0.01 | DiP, DiP-A, OT, OT-A             |
| 759 | No          | 7       | 7-B  | 1000   | McF_6 | 0   | last   | wholeT_0.5  | DiP, DiP-A, OT, OT-A             |
| 760 | No          | 7       | 7-B  | 1000   | McF_6 | 0   | unif   | singleC     | CBN, CBN-A, DiP, DiP-A, OT, OT-A |
| 761 | No          | 7       | 7-B  | 1000   | McF_6 | 0   | unif   | wholeT_0.01 | CBN, CBN-A, DiP, DiP-A, OT, OT-A |
| 762 | No          | 7       | 7-B  | 1000   | McF_6 | 0   | unif   | wholeT_0.5  | CBN, CBN-A, DiP, DiP-A, OT, OT-A |
| 763 | No          | 7       | 7-B  | 1000   | McF_6 | Inf | last   | singleC     | DiP, DiP-A, OT, OT-A             |
| 764 | No          | 7       | 7-B  | 1000   | McF_6 | Inf | last   | wholeT_0.01 | DiP, DiP-A, OT, OT-A             |
| 765 | No          | 7       | 7-B  | 1000   | McF_6 | Inf | last   | wholeT_0.5  | DiP, DiP-A, OT, OT-A             |
| 766 | No          | 7       | 7-B  | 1000   | McF_6 | Inf | unif   | singleC     | CBN, CBN-A, DiP, DiP-A, OT, OT-A |
| 767 | No          | 7       | 7-B  | 1000   | McF_6 | Inf | unif   | wholeT_0.01 | CBN, CBN-A, DiP, DiP-A, OT, OT-A |
| 768 | No          | 7       | 7-B  | 1000   | McF_6 | Inf | unif   | wholeT_0.5  | CBN, CBN-A, DiP, DiP-A, OT, OT-A |
| 769 | No          | 7       | 7-B  | 200    | Bozic | 0   | last   | singleC     | DiP, DiP-A, OT, OT-A             |
| 770 | No          | 7       | 7-B  | 200    | Bozic | 0   | last   | wholeT_0.01 | DiP, DiP-A, OT, OT-A             |
| 771 | No          | 7       | 7-B  | 200    | Bozic | 0   | last   | wholeT_0.5  | DiP, DiP-A, OT, OT-A             |
| 772 | No          | 7       | 7-B  | 200    | Bozic | 0   | unif   | singleC     | DiP, DiP-A, OT, OT-A             |
| 773 | No          | 7       | 7-B  | 200    | Bozic | 0   | unif   | wholeT_0.01 | DiP, DiP-A                       |
| 774 | No          | 7       | 7-B  | 200    | Bozic | 0   | unif   | wholeT_0.5  | DiP, DiP-A, OT, OT-A             |
| 775 | No          | 7       | 7-B  | 200    | Bozic | Inf | last   | singleC     | DiP, DiP-A, OT, OT-A             |
| 776 | No          | 7       | 7-B  | 200    | Bozic | Inf | last   | wholeT_0.01 | CBN, CBN-A, OT, OT-A             |
| 777 | No          | 7       | 7-B  | 200    | Bozic | Inf | last   | wholeT_0.5  | DiP, DiP-A, OT, OT-A             |
| 778 | No          | 7       | 7-B  | 200    | Bozic | Inf | unif   | singleC     | DiP, DiP-A                       |
| 779 | No          | 7       | 7-B  | 200    | Bozic | Inf | unif   | wholeT_0.01 | DiP, DiP-A, OT, OT-A             |
| 780 | No          | 7       | 7-B  | 200    | Bozic | Inf | unif   | wholeT_0.5  | DiP, DiP-A                       |
| 781 | No          | 7       | 7-B  | 200    | exp   | 0   | last   | singleC     | DiP, DiP-A, OT, OT-A             |
| 782 | No          | 7       | 7-B  | 200    | exp   | 0   | last   | wholeT_0.01 | DiP, DiP-A                       |
| 783 | No          | 7       | 7-B  | 200    | exp   | 0   | last   | wholeT_0.5  | DiP, DiP-A, OT, OT-A             |
| 784 | No          | 7       | 7-B  | 200    | exp   | 0   | unif   | singleC     | DiP, DiP-A, OT, OT-A             |
| 785 | No          | 7       | 7-B  | 200    | exp   | 0   | unif   | wholeT_0.01 | DiP, DiP-A                       |
| 786 | No          | 7       | 7-B  | 200    | exp   | 0   | unif   | wholeT_0.5  | DiP, DiP-A, OT, OT-A             |
| 787 | No          | 7       | 7-B  | 200    | exp   | Inf | last   | singleC     | DiP, DiP-A, OT, OT-A             |
| 788 | No          | 7       | 7-B  | 200    | exp   | Inf | last   | wholeT_0.01 | DiP                              |
| 789 | No          | 7       | 7-B  | 200    | exp   | Inf | last   | wholeT_0.5  | DiP, DiP-A, OT, OT-A             |
| 790 | No          | 7       | 7-B  | 200    | exp   | Inf | unif   | singleC     | DiP, DiP-A                       |
| 791 | No          | 7       | 7-B  | 200    | exp   | Inf | unif   | wholeT_0.01 | DiP, DiP-A                       |
| 792 | No          | 7       | 7-B  | 200    | exp   | Inf | unif   | wholeT_0.5  | DiP, DiP-A                       |
| 793 | No          | 7       | 7-B  | 200    | McF_4 | 0   | last   | singleC     | DiP, DiP-A, OT, OT-A             |
| 794 | No          | 7       | 7-B  | 200    | McF_4 | 0   | last   | wholeT_0.01 | DiP, DiP-A, OT, OT-A             |
| 795 | No          | 7       | 7-B  | 200    | McF_4 | 0   | last   | wholeT_0.5  | DiP, DiP-A, OT, OT-A             |
| 796 | No          | 7       | 7-B  | 200    | McF_4 | 0   | unif   | singleC     | DiP, DiP-A, OT, OT-A             |
| 797 | No          | 7       | 7-B  | 200    | McF_4 | 0   | unif   | wholeT_0.01 | DiP, DiP-A, OT, OT-A             |

Table 4: (continued)

|     | Conjunction | Drivers | Tree | S.Size | Model | sh  | S.Time | S.Type      | Best method(s)                   |
|-----|-------------|---------|------|--------|-------|-----|--------|-------------|----------------------------------|
| 798 | No          | 7       | 7-B  | 200    | McF_4 | 0   | unif   | wholeT_0.5  | DiP, DiP-A, OT, OT-A             |
| 799 | No          | 7       | 7-B  | 200    | McF_4 | Inf | last   | singleC     | DiP, DiP-A, OT, OT-A             |
| 800 | No          | 7       | 7-B  | 200    | McF_4 | Inf | last   | wholeT_0.01 | DiP, DiP-A, OT, OT-A             |
| 801 | No          | 7       | 7-B  | 200    | McF_4 | Inf | last   | wholeT_0.5  | DiP, DiP-A, OT, OT-A             |
| 802 | No          | 7       | 7-B  | 200    | McF_4 | Inf | unif   | singleC     | DiP, DiP-A, OT, OT-A             |
| 803 | No          | 7       | 7-B  | 200    | McF_4 | Inf | unif   | wholeT_0.01 | DiP, DiP-A, OT, OT-A             |
| 804 | No          | 7       | 7-B  | 200    | McF_4 | Inf | unif   | wholeT_0.5  | DiP, DiP-A, OT, OT-A             |
| 805 | No          | 7       | 7-B  | 200    | McF_6 | 0   | last   | singleC     | DiP, DiP-A, OT, OT-A             |
| 806 | No          | 7       | 7-B  | 200    | McF_6 | 0   | last   | wholeT_0.01 | DiP, DiP-A, OT, OT-A             |
| 807 | No          | 7       | 7-B  | 200    | McF_6 | 0   | last   | wholeT_0.5  | DiP, DiP-A, OT, OT-A             |
| 808 | No          | 7       | 7-B  | 200    | McF_6 | 0   | unif   | singleC     | CBN, CBN-A, DiP, DiP-A, OT, OT-A |
| 809 | No          | 7       | 7-B  | 200    | McF_6 | 0   | unif   | wholeT_0.01 | CBN, CBN-A, DiP, DiP-A, OT, OT-A |
| 810 | No          | 7       | 7-B  | 200    | McF_6 | 0   | unif   | wholeT_0.5  | CBN, CBN-A, DiP, OT, OT-A        |
| 811 | No          | 7       | 7-B  | 200    | McF_6 | Inf | last   | singleC     | DiP, DiP-A, OT, OT-A             |
| 812 | No          | 7       | 7-B  | 200    | McF_6 | Inf | last   | wholeT_0.01 | DiP, OT, OT-A                    |
| 813 | No          | 7       | 7-B  | 200    | McF_6 | Inf | last   | wholeT_0.5  | DiP, DiP-A, OT, OT-A             |
| 814 | No          | 7       | 7-B  | 200    | McF_6 | Inf | unif   | singleC     | CBN, CBN-A                       |
| 815 | No          | 7       | 7-B  | 200    | McF_6 | Inf | unif   | wholeT_0.01 | CBN, CBN-A, DiP, DiP-A           |
| 816 | No          | 7       | 7-B  | 200    | McF_6 | Inf | unif   | wholeT_0.5  | CBN, CBN-A, DiP                  |
| 817 | No          | 7       | 7-B  | 100    | Bozic | 0   | last   | singleC     | DiP, DiP-A, OT, OT-A             |
| 818 | No          | 7       | 7-B  | 100    | Bozic | 0   | last   | wholeT_0.01 | DiP, DiP-A, OT, OT-A             |
| 819 | No          | 7       | 7-B  | 100    | Bozic | 0   | last   | wholeT_0.5  | DiP, DiP-A, OT, OT-A             |
| 820 | No          | 7       | 7-B  | 100    | Bozic | 0   | unif   | singleC     | DiP, DiP-A, OT, OT-A             |
| 821 | No          | 7       | 7-B  | 100    | Bozic | 0   | unif   | wholeT_0.01 | DiP, DiP-A                       |
| 822 | No          | 7       | 7-B  | 100    | Bozic | 0   | unif   | wholeT_0.5  | DiP, DiP-A, OT, OT-A             |
| 823 | No          | 7       | 7-B  | 100    | Bozic | Inf | last   | singleC     | DiP, DiP-A, OT, OT-A             |
| 824 | No          | 7       | 7-B  | 100    | Bozic | Inf | last   | wholeT_0.01 | CBN, CBN-A, DiP                  |
| 825 | No          | 7       | 7-B  | 100    | Bozic | Inf | last   | wholeT_0.5  | DiP, DiP-A, OT, OT-A             |
| 826 | No          | 7       | 7-B  | 100    | Bozic | Inf | unif   | singleC     | DiP, DiP-A                       |
| 827 | No          | 7       | 7-B  | 100    | Bozic | Inf | unif   | wholeT_0.01 | DiP, DiP-A                       |
| 828 | No          | 7       | 7-B  | 100    | Bozic | Inf | unif   | wholeT_0.5  | DiP, DiP-A                       |
| 829 | No          | 7       | 7-B  | 100    | exp   | 0   | last   | singleC     | DiP, DiP-A, OT, OT-A             |
| 830 | No          | 7       | 7-B  | 100    | exp   | 0   | last   | wholeT_0.01 | DiP, DiP-A                       |
| 831 | No          | 7       | 7-B  | 100    | exp   | 0   | last   | wholeT_0.5  | DiP, DiP-A, OT, OT-A             |
| 832 | No          | 7       | 7-B  | 100    | exp   | 0   | unif   | singleC     | DiP, DiP-A, OT, OT-A             |
| 833 | No          | 7       | 7-B  | 100    | exp   | 0   | unif   | wholeT_0.01 | DiP, DiP-A, OT, OT-A             |
| 834 | No          | 7       | 7-B  | 100    | exp   | 0   | unif   | wholeT_0.5  | DiP, DiP-A, OT, OT-A             |
| 835 | No          | 7       | 7-B  | 100    | exp   | Inf | last   | singleC     | DiP, DiP-A, OT, OT-A             |
| 836 | No          | 7       | 7-B  | 100    | exp   | Inf | last   | wholeT_0.01 | DiP, DiP-A                       |
| 837 | No          | 7       | 7-B  | 100    | exp   | Inf | last   | wholeT_0.5  | DiP, DiP-A, OT, OT-A             |

Table 4: (continued)

|     | Conjunction | Drivers | Tree | S.Size | Model | sh  | S.Time | S.Type      | Best method(s)            |
|-----|-------------|---------|------|--------|-------|-----|--------|-------------|---------------------------|
| 838 | No          | 7       | 7-B  | 100    | exp   | Inf | unif   | singleC     | DiP, DiP-A                |
| 839 | No          | 7       | 7-B  | 100    | exp   | Inf | unif   | wholeT_0.01 | DiP, DiP-A, OT, OT-A      |
| 840 | No          | 7       | 7-B  | 100    | exp   | Inf | unif   | wholeT_0.5  | DiP, DiP-A                |
| 841 | No          | 7       | 7-B  | 100    | McF_4 | 0   | last   | singleC     | DiP, DiP-A, OT, OT-A      |
| 842 | No          | 7       | 7-B  | 100    | McF_4 | 0   | last   | wholeT_0.01 | DiP, DiP-A, OT, OT-A      |
| 843 | No          | 7       | 7-B  | 100    | McF_4 | 0   | last   | wholeT_0.5  | DiP, DiP-A, OT, OT-A      |
| 844 | No          | 7       | 7-B  | 100    | McF_4 | 0   | unif   | singleC     | DiP, DiP-A                |
| 845 | No          | 7       | 7-B  | 100    | McF_4 | 0   | unif   | wholeT_0.01 | DiP, DiP-A                |
| 846 | No          | 7       | 7-B  | 100    | McF_4 | 0   | unif   | wholeT_0.5  | DiP, DiP-A, OT, OT-A      |
| 847 | No          | 7       | 7-B  | 100    | McF_4 | Inf | last   | singleC     | DiP, DiP-A, OT, OT-A      |
| 848 | No          | 7       | 7-B  | 100    | McF_4 | Inf | last   | wholeT_0.01 | DiP, DiP-A, OT, OT-A      |
| 849 | No          | 7       | 7-B  | 100    | McF_4 | Inf | last   | wholeT_0.5  | DiP, DiP-A, OT, OT-A      |
| 850 | No          | 7       | 7-B  | 100    | McF_4 | Inf | unif   | singleC     | DiP, DiP-A, OT, OT-A      |
| 851 | No          | 7       | 7-B  | 100    | McF_4 | Inf | unif   | wholeT_0.01 | DiP, DiP-A                |
| 852 | No          | 7       | 7-B  | 100    | McF_4 | Inf | unif   | wholeT_0.5  | DiP, DiP-A                |
| 853 | No          | 7       | 7-B  | 100    | McF_6 | 0   | last   | singleC     | DiP, DiP-A, OT, OT-A      |
| 854 | No          | 7       | 7-B  | 100    | McF_6 | 0   | last   | wholeT_0.01 | DiP, OT, OT-A             |
| 855 | No          | 7       | 7-B  | 100    | McF_6 | 0   | last   | wholeT_0.5  | DiP, DiP-A, OT, OT-A      |
| 856 | No          | 7       | 7-B  | 100    | McF_6 | 0   | unif   | singleC     | CBN, CBN-A, DiP, OT, OT-A |
| 857 | No          | 7       | 7-B  | 100    | McF_6 | 0   | unif   | wholeT_0.01 | CBN, CBN-A, DiP, DiP-A    |
| 858 | No          | 7       | 7-B  | 100    | McF_6 | 0   | unif   | wholeT_0.5  | CBN, CBN-A                |
| 859 | No          | 7       | 7-B  | 100    | McF_6 | Inf | last   | singleC     | DiP, DiP-A, OT, OT-A      |
| 860 | No          | 7       | 7-B  | 100    | McF_6 | Inf | last   | wholeT_0.01 | DiP, OT, OT-A             |
| 861 | No          | 7       | 7-B  | 100    | McF_6 | Inf | last   | wholeT_0.5  | DiP, DiP-A, OT, OT-A      |
| 862 | No          | 7       | 7-B  | 100    | McF_6 | Inf | unif   | singleC     | CBN, CBN-A                |
| 863 | No          | 7       | 7-B  | 100    | McF_6 | Inf | unif   | wholeT_0.01 | CBN, CBN-A                |
| 864 | No          | 7       | 7-B  | 100    | McF_6 | Inf | unif   | wholeT_0.5  | CBN, CBN-A                |

### 3 Drivers Unknown (MCB-2)

### 3.1 Confidence sets (MCB-2), Diff, Drivers Unknown

Table 5: Confidence sets (method MCB-2) when Drivers are Unknown for measure Diff.

|    | Conjunction | Drivers | Tree | S.Size | Model | sh  | S.Time | S.Type      | Best method(s)                                                                                       |
|----|-------------|---------|------|--------|-------|-----|--------|-------------|------------------------------------------------------------------------------------------------------|
| 1  | Yes         | 11      | 11-A | 1000   | Bozic | 0   | last   | singleC     | S1:OT, S1:OT-A                                                                                       |
| 2  | Yes         | 11      | 11-A | 1000   | Bozic | 0   | last   | wholeT_0.01 | S1:DiP, S1:DiP-A, S5:DiP, S5:DiP-A                                                                   |
| 3  | Yes         | 11      | 11-A | 1000   | Bozic | 0   | last   | wholeT_0.5  | S1:OT, S1:OT-A                                                                                       |
| 4  | Yes         | 11      | 11-A | 1000   | Bozic | 0   | unif   | singleC     | S1:DiP, S1:DiP-A, S1:OT, S1:OT-A                                                                     |
| 5  | Yes         | 11      | 11-A | 1000   | Bozic | 0   | unif   | wholeT_0.01 | J1:CBN-A, J1:DiP, J1:DiP-A, S5:CBN, S5:CBN-A, S5:DiP, S5:DiP-A, S5:OT, S5:OT-A                       |
| 6  | Yes         | 11      | 11-A | 1000   | Bozic | 0   | unif   | wholeT_0.5  | S1:DiP, S1:DiP-A, S1:OT, S1:OT-A, S5:DiP, S5:DiP-A, S5:OT, S5:OT-A                                   |
| 7  | Yes         | 11      | 11-A | 1000   | Bozic | Inf | last   | singleC     | S5:DiP, S5:DiP-A, S5:OT, S5:OT-A                                                                     |
| 8  | Yes         | 11      | 11-A | 1000   | Bozic | Inf | last   | wholeT_0.01 | J1:DiP, J1:DiP-A, J1:OT, J1:OT-A, J5:DiP, J5:DiP-A, J5:OT, J5:OT-A                                   |
| 9  | Yes         | 11      | 11-A | 1000   | Bozic | Inf | last   | wholeT_0.5  | S5:DiP, S5:DiP-A, S5:OT, S5:OT-A                                                                     |
| 10 | Yes         | 11      | 11-A | 1000   | Bozic | Inf | unif   | singleC     | S1:CBN, S1:CBN-A, S1:DiP, S1:DiP-A, S1:OT, S1:OT-A                                                   |
| 11 | Yes         | 11      | 11-A | 1000   | Bozic | Inf | unif   | wholeT_0.01 | J1:CBN-A, S5:CBN-A                                                                                   |
| 12 | Yes         | 11      | 11-A | 1000   | Bozic | Inf | unif   | wholeT_0.5  | J1:DiP, J1:DiP-A, J1:OT, J1:OT-A, S1:CBN, S1:CBN-A, S1:OT, S1:OT-A, S5:DiP, S5:DiP-A, S5:OT, S5:OT-A |
| 13 | Yes         | 11      | 11-A | 1000   | exp   | 0   | last   | singleC     | S1:OT, S1:OT-A                                                                                       |
| 14 | Yes         | 11      | 11-A | 1000   | exp   | 0   | last   | wholeT_0.01 | S1:DiP-A, S1:OT, S1:OT-A, S5:DiP-A, S5:OT, S5:OT-A                                                   |
| 15 | Yes         | 11      | 11-A | 1000   | exp   | 0   | last   | wholeT_0.5  | S1:OT, S1:OT-A                                                                                       |
| 16 | Yes         | 11      | 11-A | 1000   | exp   | 0   | unif   | singleC     | S1:DiP, S1:DiP-A, S1:OT, S1:OT-A, S5:DiP, S5:DiP-A, S5:OT, S5:OT-A                                   |
| 17 | Yes         | 11      | 11-A | 1000   | exp   | 0   | unif   | wholeT_0.01 | S1:CBN-A, S1:DiP, S1:DiP-A, S1:OT, S1:OT-A                                                           |
| 18 | Yes         | 11      | 11-A | 1000   | exp   | 0   | unif   | wholeT_0.5  | S1:DiP, S1:DiP-A, S1:OT, S1:OT-A, S5:DiP, S5:DiP-A, S5:OT, S5:OT-A                                   |
| 19 | Yes         | 11      | 11-A | 1000   | exp   | Inf | last   | singleC     | S5:DiP, S5:DiP-A, S5:OT, S5:OT-A                                                                     |
| 20 | Yes         | 11      | 11-A | 1000   | exp   | Inf | last   | wholeT_0.01 | S5:DiP, S5:DiP-A, S5:OT, S5:OT-A                                                                     |
| 21 | Yes         | 11      | 11-A | 1000   | exp   | Inf | last   | wholeT_0.5  | S5:DiP, S5:DiP-A, S5:OT, S5:OT-A                                                                     |
| 22 | Yes         | 11      | 11-A | 1000   | exp   | Inf | unif   | singleC     | S1:CBN, S1:CBN-A, S1:OT, S1:OT-A                                                                     |
| 23 | Yes         | 11      | 11-A | 1000   | exp   | Inf | unif   | wholeT_0.01 | J1:CBN-A, J1:OT, J1:OT-A, S5:DiP, S5:DiP-A, S5:OT, S5:OT-A                                           |
| 24 | Yes         | 11      | 11-A | 1000   | exp   | Inf | unif   | wholeT_0.5  | S1:CBN, S1:CBN-A, S1:OT, S1:OT-A                                                                     |
| 25 | Yes         | 11      | 11-A | 1000   | McF_4 | 0   | last   | singleC     | S1:DiP-A, S1:OT, S1:OT-A                                                                             |

Table 5: (continued)

|    | Conjunction | Drivers | Tree | S.Size | Model | sh  | S.Time | S.Type      | Best method(s)                                                                                         |
|----|-------------|---------|------|--------|-------|-----|--------|-------------|--------------------------------------------------------------------------------------------------------|
| 26 | Yes         | 11      | 11-A | 1000   | McF_4 | 0   | last   | wholeT_0.01 | S1:DiP-A, S1:OT, S1:OT-A, S5:DiP, S5:DiP-A, S5:OT, S5:OT-A                                             |
| 27 | Yes         | 11      | 11-A | 1000   | McF_4 | 0   | last   | wholeT_0.5  | S1:DiP-A, S1:OT, S1:OT-A                                                                               |
| 28 | Yes         | 11      | 11-A | 1000   | McF_4 | 0   | unif   | singleC     | S1:DiP, S1:DiP-A, S1:OT, S1:OT-A                                                                       |
| 29 | Yes         | 11      | 11-A | 1000   | McF_4 | 0   | unif   | wholeT_0.01 | S1:OT, S1:OT-A, S5:DiP, S5:DiP-A, S5:OT, S5:OT-A                                                       |
| 30 | Yes         | 11      | 11-A | 1000   | McF_4 | 0   | unif   | wholeT_0.5  | S1:DiP, S1:DiP-A, S1:OT, S1:OT-A, S5:DiP, S5:DiP-A, S5:OT, S5:OT-A                                     |
| 31 | Yes         | 11      | 11-A | 1000   | McF_4 | Inf | last   | singleC     | S1:OT, S1:OT-A                                                                                         |
| 32 | Yes         | 11      | 11-A | 1000   | McF_4 | Inf | last   | wholeT_0.01 | S5:DiP, S5:DiP-A, S5:OT, S5:OT-A                                                                       |
| 33 | Yes         | 11      | 11-A | 1000   | McF_4 | Inf | last   | wholeT_0.5  | S1:DiP-A, S1:OT, S1:OT-A                                                                               |
| 34 | Yes         | 11      | 11-A | 1000   | McF_4 | Inf | unif   | singleC     | S1:OT, S1:OT-A                                                                                         |
| 35 | Yes         | 11      | 11-A | 1000   | McF_4 | Inf | unif   | wholeT_0.01 | S5:DiP, S5:DiP-A, S5:OT, S5:OT-A                                                                       |
| 36 | Yes         | 11      | 11-A | 1000   | McF_4 | Inf | unif   | wholeT_0.5  | S1:OT, S1:OT-A                                                                                         |
| 37 | Yes         | 11      | 11-A | 1000   | McF_6 | 0   | last   | singleC     | S1:DiP, S1:OT, S5:DiP                                                                                  |
| 38 | Yes         | 11      | 11-A | 1000   | McF_6 | 0   | last   | wholeT_0.01 | S5:DiP                                                                                                 |
| 39 | Yes         | 11      | 11-A | 1000   | McF_6 | 0   | last   | wholeT_0.5  | S1:DiP, S5:DiP                                                                                         |
| 40 | Yes         | 11      | 11-A | 1000   | McF_6 | 0   | unif   | singleC     | S1:DiP, S1:DiP-A, S1:OT, S1:OT-A                                                                       |
| 41 | Yes         | 11      | 11-A | 1000   | McF_6 | 0   | unif   | wholeT_0.01 | S1:DiP, S1:DiP-A, S1:OT, S1:OT-A                                                                       |
| 42 | Yes         | 11      | 11-A | 1000   | McF_6 | 0   | unif   | wholeT_0.5  | S1:DiP, S1:DiP-A                                                                                       |
| 43 | Yes         | 11      | 11-A | 1000   | McF_6 | Inf | last   | singleC     | S1:OT                                                                                                  |
| 44 | Yes         | 11      | 11-A | 1000   | McF_6 | Inf | last   | wholeT_0.01 | S5:OT                                                                                                  |
| 45 | Yes         | 11      | 11-A | 1000   | McF_6 | Inf | last   | wholeT_0.5  | S1:DiP, S1:OT, S5:OT                                                                                   |
| 46 | Yes         | 11      | 11-A | 1000   | McF_6 | Inf | unif   | singleC     | S1:DiP, S1:DiP-A                                                                                       |
| 47 | Yes         | 11      | 11-A | 1000   | McF_6 | Inf | unif   | wholeT_0.01 | S1:DiP, S1:DiP-A, S5:DiP, S5:DiP-A, S5:OT, S5:OT-A                                                     |
| 48 | Yes         | 11      | 11-A | 1000   | McF_6 | Inf | unif   | wholeT_0.5  | S1:DiP, S1:DiP-A                                                                                       |
| 49 | Yes         | 11      | 11-A | 200    | Bozic | 0   | last   | singleC     | S1:OT, S1:OT-A                                                                                         |
| 50 | Yes         | 11      | 11-A | 200    | Bozic | 0   | last   | wholeT_0.01 | J1:OT, J1:OT-A, J5:OT, J5:OT-A, S5:OT, S5:OT-A                                                         |
| 51 | Yes         | 11      | 11-A | 200    | Bozic | 0   | last   | wholeT_0.5  | S1:OT, S1:OT-A                                                                                         |
| 52 | Yes         | 11      | 11-A | 200    | Bozic | 0   | unif   | singleC     | S1:OT, S1:OT-A                                                                                         |
| 53 | Yes         | 11      | 11-A | 200    | Bozic | 0   | unif   | wholeT_0.01 | J1:CBN, J1:CBN-A, J1:DiP, J1:DiP-A, J1:OT, J1:OT-A, S5:CBN, S5:CBN-A, S5:DiP, S5:DiP-A, S5:OT, S5:OT-A |
| 54 | Yes         | 11      | 11-A | 200    | Bozic | 0   | unif   | wholeT_0.5  | S1:OT, S1:OT-A, S5:DiP, S5:DiP-A, S5:OT, S5:OT-A                                                       |
| 55 | Yes         | 11      | 11-A | 200    | Bozic | Inf | last   | singleC     | S5:OT, S5:OT-A                                                                                         |
| 56 | Yes         | 11      | 11-A | 200    | Bozic | Inf | last   | wholeT_0.01 | J5:OT, J5:OT-A                                                                                         |
| 57 | Yes         | 11      | 11-A | 200    | Bozic | Inf | last   | wholeT_0.5  | S5:OT, S5:OT-A                                                                                         |

Table 5: (continued)

|    | Conjunction | Drivers | Tree | S.Size | Model | sh  | S.Time | S.Type      | Best method(s)                                                     |
|----|-------------|---------|------|--------|-------|-----|--------|-------------|--------------------------------------------------------------------|
| 58 | Yes         | 11      | 11-A | 200    | Bozic | Inf | unif   | singleC     | J1:CBN, J1:CBN-A, J1:OT, J1:OT-A, S5:OT, S5:OT-A                   |
| 59 | Yes         | 11      | 11-A | 200    | Bozic | Inf | unif   | wholeT_0.01 | J5:OT, J5:OT-A, S5:CBN, S5:CBN-A, S5:OT, S5:OT-A                   |
| 60 | Yes         | 11      | 11-A | 200    | Bozic | Inf | unif   | wholeT_0.5  | J1:CBN-A, J1:OT, J1:OT-A                                           |
| 61 | Yes         | 11      | 11-A | 200    | exp   | 0   | last   | singleC     | S1:OT, S1:OT-A                                                     |
| 62 | Yes         | 11      | 11-A | 200    | exp   | 0   | last   | wholeT_0.01 | S1:OT, S1:OT-A, S5:OT, S5:OT-A                                     |
| 63 | Yes         | 11      | 11-A | 200    | exp   | 0   | last   | wholeT_0.5  | S1:OT, S1:OT-A                                                     |
| 64 | Yes         | 11      | 11-A | 200    | exp   | 0   | unif   | singleC     | S1:DiP, S1:DiP-A, S1:OT, S1:OT-A, S5:DiP, S5:DiP-A, S5:OT, S5:OT-A |
| 65 | Yes         | 11      | 11-A | 200    | exp   | 0   | unif   | wholeT_0.01 | S1:OT, S1:OT-A                                                     |
| 66 | Yes         | 11      | 11-A | 200    | exp   | 0   | unif   | wholeT_0.5  | S1:DiP, S1:DiP-A, S1:OT, S1:OT-A, S5:DiP, S5:DiP-A, S5:OT, S5:OT-A |
| 67 | Yes         | 11      | 11-A | 200    | exp   | Inf | last   | singleC     | S5:OT, S5:OT-A                                                     |
| 68 | Yes         | 11      | 11-A | 200    | exp   | Inf | last   | wholeT_0.01 | J5:CBN-A, J5:OT, J5:OT-A                                           |
| 69 | Yes         | 11      | 11-A | 200    | exp   | Inf | last   | wholeT_0.5  | S5:OT, S5:OT-A                                                     |
| 70 | Yes         | 11      | 11-A | 200    | exp   | Inf | unif   | singleC     | S1:OT, S1:OT-A, S5:DiP, S5:DiP-A, S5:OT, S5:OT-A                   |
| 71 | Yes         | 11      | 11-A | 200    | exp   | Inf | unif   | wholeT_0.01 | S5:CBN-A, S5:OT, S5:OT-A                                           |
| 72 | Yes         | 11      | 11-A | 200    | exp   | Inf | unif   | wholeT_0.5  | S1:OT, S1:OT-A                                                     |
| 73 | Yes         | 11      | 11-A | 200    | McF_4 | 0   | last   | singleC     | S1:OT, S1:OT-A, S5:OT, S5:OT-A                                     |
| 74 | Yes         | 11      | 11-A | 200    | McF_4 | 0   | last   | wholeT_0.01 | S1:OT, S1:OT-A, S5:OT, S5:OT-A                                     |
| 75 | Yes         | 11      | 11-A | 200    | McF_4 | 0   | last   | wholeT_0.5  | S1:OT, S1:OT-A, S5:OT, S5:OT-A                                     |
| 76 | Yes         | 11      | 11-A | 200    | McF_4 | 0   | unif   | singleC     | S5:CBN-A, S5:OT, S5:OT-A                                           |
| 77 | Yes         | 11      | 11-A | 200    | McF_4 | 0   | unif   | wholeT_0.01 | S5:CBN, S5:OT, S5:OT-A                                             |
| 78 | Yes         | 11      | 11-A | 200    | McF_4 | 0   | unif   | wholeT_0.5  | S5:OT, S5:OT-A                                                     |
| 79 | Yes         | 11      | 11-A | 200    | McF_4 | Inf | last   | singleC     | S1:OT, S1:OT-A, S5:OT, S5:OT-A                                     |
| 80 | Yes         | 11      | 11-A | 200    | McF_4 | Inf | last   | wholeT_0.01 | S5:OT, S5:OT-A                                                     |
| 81 | Yes         | 11      | 11-A | 200    | McF_4 | Inf | last   | wholeT_0.5  | S1:OT, S1:OT-A, S5:OT, S5:OT-A                                     |
| 82 | Yes         | 11      | 11-A | 200    | McF_4 | Inf | unif   | singleC     | S5:CBN-A, S5:OT, S5:OT-A                                           |
| 83 | Yes         | 11      | 11-A | 200    | McF_4 | Inf | unif   | wholeT_0.01 | S5:CBN-A, S5:OT, S5:OT-A                                           |
| 84 | Yes         | 11      | 11-A | 200    | McF_4 | Inf | unif   | wholeT_0.5  | S1:OT, S1:OT-A, S5:CBN-A, S5:OT, S5:OT-A                           |
| 85 | Yes         | 11      | 11-A | 200    | McF_6 | 0   | last   | singleC     | S5:OT                                                              |
| 86 | Yes         | 11      | 11-A | 200    | McF_6 | 0   | last   | wholeT_0.01 | S5:OT                                                              |
| 87 | Yes         | 11      | 11-A | 200    | McF_6 | 0   | last   | wholeT_0.5  | S1:OT, S5:OT                                                       |
| 88 | Yes         | 11      | 11-A | 200    | McF_6 | 0   | unif   | singleC     | J1:CBN, J1:CBN-A, S1:OT, S1:OT-A, S5:CBN, S5:CBN-A, S5:OT, S5:OT-A |
| 89 | Yes         | 11      | 11-A | 200    | McF_6 | 0   | unif   | wholeT_0.01 | S1:OT, S1:OT-A, S5:CBN, S5:CBN-A, S5:OT, S5:OT-A                   |



Table 5: (continued)

|     | Conjunction | Drivers | Tree | S.Size | Model | sh  | S.Time | S.Type      | Best method(s)                                                                       |
|-----|-------------|---------|------|--------|-------|-----|--------|-------------|--------------------------------------------------------------------------------------|
| 90  | Yes         | 11      | 11-A | 200    | McF_6 | 0   | unif   | wholeT_0.5  | J1:CBN, J1:CBN-A, S1:OT, S1:OT-A, S5:CBN, S5:CBN-A, S5:OT, S5:OT-A                   |
| 91  | Yes         | 11      | 11-A | 200    | McF_6 | Inf | last   | singleC     | S1:OT, S5:OT                                                                         |
| 92  | Yes         | 11      | 11-A | 200    | McF_6 | Inf | last   | wholeT_0.01 | S5:OT, S5:OT-A                                                                       |
| 93  | Yes         | 11      | 11-A | 200    | McF_6 | Inf | last   | wholeT_0.5  | S1:OT, S5:OT                                                                         |
| 94  | Yes         | 11      | 11-A | 200    | McF_6 | Inf | unif   | singleC     | J1:CBN-A, S1:OT, S1:OT-A, S5:CBN, S5:CBN-A, S5:OT, S5:OT-A                           |
| 95  | Yes         | 11      | 11-A | 200    | McF_6 | Inf | unif   | wholeT_0.01 | J1:CBN-A, S5:CBN, S5:CBN-A, S5:OT, S5:OT-A                                           |
| 96  | Yes         | 11      | 11-A | 200    | McF_6 | Inf | unif   | wholeT_0.5  | J1:CBN-A, J1:OT, J1:OT-A, S1:CBN-A, S1:OT, S1:OT-A, S5:CBN, S5:CBN-A, S5:OT, S5:OT-A |
| 97  | Yes         | 11      | 11-A | 100    | Bozic | 0   | last   | singleC     | S5:OT, S5:OT-A                                                                       |
| 98  | Yes         | 11      | 11-A | 100    | Bozic | 0   | last   | wholeT_0.01 | J5:OT, J5:OT-A, S5:OT, S5:OT-A                                                       |
| 99  | Yes         | 11      | 11-A | 100    | Bozic | 0   | last   | wholeT_0.5  | S1:OT, S1:OT-A, S5:OT, S5:OT-A                                                       |
| 100 | Yes         | 11      | 11-A | 100    | Bozic | 0   | unif   | singleC     | J1:OT, J1:OT-A, S5:DiP, S5:DiP-A, S5:OT, S5:OT-A                                     |
| 101 | Yes         | 11      | 11-A | 100    | Bozic | 0   | unif   | wholeT_0.01 | J1:OT, J1:OT-A, S5:OT, S5:OT-A                                                       |
| 102 | Yes         | 11      | 11-A | 100    | Bozic | 0   | unif   | wholeT_0.5  | S5:DiP, S5:DiP-A, S5:OT, S5:OT-A                                                     |
| 103 | Yes         | 11      | 11-A | 100    | Bozic | Inf | last   | singleC     | J1:OT, J1:OT-A, J5:OT, J5:OT-A, S5:OT, S5:OT-A                                       |
| 104 | Yes         | 11      | 11-A | 100    | Bozic | Inf | last   | wholeT_0.01 | J5:CBN-A, J5:OT, J5:OT-A                                                             |
| 105 | Yes         | 11      | 11-A | 100    | Bozic | Inf | last   | wholeT_0.5  | J1:OT, J1:OT-A, J5:OT, J5:OT-A, S5:OT, S5:OT-A                                       |
| 106 | Yes         | 11      | 11-A | 100    | Bozic | Inf | unif   | singleC     | S5:OT, S5:OT-A                                                                       |
| 107 | Yes         | 11      | 11-A | 100    | Bozic | Inf | unif   | wholeT_0.01 | J5:OT, J5:OT-A, S5:OT, S5:OT-A                                                       |
| 108 | Yes         | 11      | 11-A | 100    | Bozic | Inf | unif   | wholeT_0.5  | S5:DiP, S5:DiP-A, S5:OT, S5:OT-A                                                     |
| 109 | Yes         | 11      | 11-A | 100    | exp   | 0   | last   | singleC     | S1:OT, S1:OT-A                                                                       |
| 110 | Yes         | 11      | 11-A | 100    | exp   | 0   | last   | wholeT_0.01 | S1:OT, S1:OT-A, S5:OT, S5:OT-A                                                       |
| 111 | Yes         | 11      | 11-A | 100    | exp   | 0   | last   | wholeT_0.5  | S1:OT, S1:OT-A                                                                       |
| 112 | Yes         | 11      | 11-A | 100    | exp   | 0   | unif   | singleC     | S1:OT, S1:OT-A, S5:DiP, S5:DiP-A, S5:OT, S5:OT-A                                     |
| 113 | Yes         | 11      | 11-A | 100    | exp   | 0   | unif   | wholeT_0.01 | J1:OT, J1:OT-A, S1:OT, S1:OT-A, S5:DiP, S5:DiP-A, S5:OT, S5:OT-A                     |
| 114 | Yes         | 11      | 11-A | 100    | exp   | 0   | unif   | wholeT_0.5  | S1:OT, S1:OT-A, S5:DiP, S5:DiP-A, S5:OT, S5:OT-A                                     |
| 115 | Yes         | 11      | 11-A | 100    | exp   | Inf | last   | singleC     | S5:OT, S5:OT-A                                                                       |
| 116 | Yes         | 11      | 11-A | 100    | exp   | Inf | last   | wholeT_0.01 | J5:CBN-A, J5:OT, J5:OT-A                                                             |
| 117 | Yes         | 11      | 11-A | 100    | exp   | Inf | last   | wholeT_0.5  | S5:OT, S5:OT-A                                                                       |

Table 5: (continued)

|     | Conjunction | Drivers | Tree | S.Size | Model | sh  | S.Time | S.Type      | Best method(s)                                                     |
|-----|-------------|---------|------|--------|-------|-----|--------|-------------|--------------------------------------------------------------------|
| 118 | Yes         | 11      | 11-A | 100    | exp   | Inf | unif   | singleC     | J1:CBN, J1:CBN-A, J1:OT, J1:OT-A, S5:DiP, S5:DiP-A, S5:OT, S5:OT-A |
| 119 | Yes         | 11      | 11-A | 100    | exp   | Inf | unif   | wholeT_0.01 | J5:OT, J5:OT-A, S5:OT, S5:OT-A                                     |
| 120 | Yes         | 11      | 11-A | 100    | exp   | Inf | unif   | wholeT_0.5  | J1:OT, J1:OT-A, S5:DiP, S5:DiP-A, S5:OT, S5:OT-A                   |
| 121 | Yes         | 11      | 11-A | 100    | McF_4 | 0   | last   | singleC     | S5:OT, S5:OT-A                                                     |
| 122 | Yes         | 11      | 11-A | 100    | McF_4 | 0   | last   | wholeT_0.01 | S5:OT, S5:OT-A                                                     |
| 123 | Yes         | 11      | 11-A | 100    | McF_4 | 0   | last   | wholeT_0.5  | S5:OT, S5:OT-A                                                     |
| 124 | Yes         | 11      | 11-A | 100    | McF_4 | 0   | unif   | singleC     | S5:CBN-A, S5:OT, S5:OT-A                                           |
| 125 | Yes         | 11      | 11-A | 100    | McF_4 | 0   | unif   | wholeT_0.01 | S5:CBN-A, S5:OT, S5:OT-A                                           |
| 126 | Yes         | 11      | 11-A | 100    | McF_4 | 0   | unif   | wholeT_0.5  | S5:CBN, S5:CBN-A, S5:OT, S5:OT-A                                   |
| 127 | Yes         | 11      | 11-A | 100    | McF_4 | Inf | last   | singleC     | S1:OT, S1:OT-A, S5:OT, S5:OT-A                                     |
| 128 | Yes         | 11      | 11-A | 100    | McF_4 | Inf | last   | wholeT_0.01 | S5:OT, S5:OT-A                                                     |
| 129 | Yes         | 11      | 11-A | 100    | McF_4 | Inf | last   | wholeT_0.5  | S5:OT, S5:OT-A                                                     |
| 130 | Yes         | 11      | 11-A | 100    | McF_4 | Inf | unif   | singleC     | S5:CBN-A, S5:OT, S5:OT-A                                           |
| 131 | Yes         | 11      | 11-A | 100    | McF_4 | Inf | unif   | wholeT_0.01 | S5:CBN-A, S5:OT, S5:OT-A                                           |
| 132 | Yes         | 11      | 11-A | 100    | McF_4 | Inf | unif   | wholeT_0.5  | S5:CBN, S5:CBN-A, S5:OT, S5:OT-A                                   |
| 133 | Yes         | 11      | 11-A | 100    | McF_6 | 0   | last   | singleC     | S1:OT, S5:OT                                                       |
| 134 | Yes         | 11      | 11-A | 100    | McF_6 | 0   | last   | wholeT_0.01 | S5:OT, S5:OT-A                                                     |
| 135 | Yes         | 11      | 11-A | 100    | McF_6 | 0   | last   | wholeT_0.5  | S1:OT, S5:OT                                                       |
| 136 | Yes         | 11      | 11-A | 100    | McF_6 | 0   | unif   | singleC     | J1:CBN-A, S5:CBN, S5:CBN-A, S5:OT, S5:OT-A                         |
| 137 | Yes         | 11      | 11-A | 100    | McF_6 | 0   | unif   | wholeT_0.01 | S5:CBN, S5:OT, S5:OT-A                                             |
| 138 | Yes         | 11      | 11-A | 100    | McF_6 | 0   | unif   | wholeT_0.5  | J1:CBN, J1:CBN-A, S1:OT, S1:OT-A, S5:CBN, S5:CBN-A, S5:OT, S5:OT-A |
| 139 | Yes         | 11      | 11-A | 100    | McF_6 | Inf | last   | singleC     | S5:OT                                                              |
| 140 | Yes         | 11      | 11-A | 100    | McF_6 | Inf | last   | wholeT_0.01 | S5:OT, S5:OT-A                                                     |
| 141 | Yes         | 11      | 11-A | 100    | McF_6 | Inf | last   | wholeT_0.5  | S5:OT                                                              |
| 142 | Yes         | 11      | 11-A | 100    | McF_6 | Inf | unif   | singleC     | J1:CBN, J1:CBN-A, S1:OT, S1:OT-A, S5:CBN, S5:CBN-A, S5:OT, S5:OT-A |
| 143 | Yes         | 11      | 11-A | 100    | McF_6 | Inf | unif   | wholeT_0.01 | S5:CBN, S5:CBN-A, S5:OT, S5:OT-A                                   |
| 144 | Yes         | 11      | 11-A | 100    | McF_6 | Inf | unif   | wholeT_0.5  | J1:CBN-A, S1:OT, S1:OT-A, S5:CBN, S5:CBN-A, S5:OT, S5:OT-A         |
| 145 | Yes         | 9       | 9-A  | 1000   | Bozic | 0   | last   | singleC     | S1:OT, S1:OT-A                                                     |
| 146 | Yes         | 9       | 9-A  | 1000   | Bozic | 0   | last   | wholeT_0.01 | S1:DiP, S1:DiP-A, S1:OT, S1:OT-A, S5:DiP, S5:DiP-A, S5:OT, S5:OT-A |
| 147 | Yes         | 9       | 9-A  | 1000   | Bozic | 0   | last   | wholeT_0.5  | S1:OT, S1:OT-A                                                     |
| 148 | Yes         | 9       | 9-A  | 1000   | Bozic | 0   | unif   | singleC     | S1:DiP, S1:DiP-A, S1:OT, S1:OT-A, S5:DiP, S5:DiP-A, S5:OT, S5:OT-A |

Table 5: (continued)

|     | Conjunction | Drivers | Tree | S.Size | Model | sh  | S.Time | S.Type      | Best method(s)                                                     |
|-----|-------------|---------|------|--------|-------|-----|--------|-------------|--------------------------------------------------------------------|
| 149 | Yes         | 9       | 9-A  | 1000   | Bozic | 0   | unif   | wholeT_0.01 | J1:DiP, J1:DiP-A, J1:OT, J1:OT-A, S1:DiP, S1:DiP-A, S1:OT, S1:OT-A |
| 150 | Yes         | 9       | 9-A  | 1000   | Bozic | 0   | unif   | wholeT_0.5  | S1:DiP, S1:DiP-A, S1:OT, S1:OT-A, S5:DiP, S5:DiP-A, S5:OT, S5:OT-A |
| 151 | Yes         | 9       | 9-A  | 1000   | Bozic | Inf | last   | singleC     | S5:OT, S5:OT-A                                                     |
| 152 | Yes         | 9       | 9-A  | 1000   | Bozic | Inf | last   | wholeT_0.01 | J5:DiP, J5:DiP-A, J5:OT, J5:OT-A                                   |
| 153 | Yes         | 9       | 9-A  | 1000   | Bozic | Inf | last   | wholeT_0.5  | S5:DiP, S5:DiP-A, S5:OT, S5:OT-A                                   |
| 154 | Yes         | 9       | 9-A  | 1000   | Bozic | Inf | unif   | singleC     | S1:OT, S1:OT-A                                                     |
| 155 | Yes         | 9       | 9-A  | 1000   | Bozic | Inf | unif   | wholeT_0.01 | S5:DiP, S5:DiP-A, S5:OT, S5:OT-A                                   |
| 156 | Yes         | 9       | 9-A  | 1000   | Bozic | Inf | unif   | wholeT_0.5  | S1:CBN, S1:OT, S1:OT-A                                             |
| 157 | Yes         | 9       | 9-A  | 1000   | exp   | 0   | last   | singleC     | S1:DiP, S1:DiP-A, S1:OT, S1:OT-A                                   |
| 158 | Yes         | 9       | 9-A  | 1000   | exp   | 0   | last   | wholeT_0.01 | S1:DiP-A, S1:OT, S1:OT-A                                           |
| 159 | Yes         | 9       | 9-A  | 1000   | exp   | 0   | last   | wholeT_0.5  | S1:DiP, S1:DiP-A, S1:OT, S1:OT-A, S5:DiP, S5:DiP-A, S5:OT, S5:OT-A |
| 160 | Yes         | 9       | 9-A  | 1000   | exp   | 0   | unif   | singleC     | S1:DiP, S1:DiP-A, S1:OT, S1:OT-A, S5:DiP, S5:DiP-A, S5:OT, S5:OT-A |
| 161 | Yes         | 9       | 9-A  | 1000   | exp   | 0   | unif   | wholeT_0.01 | S1:DiP, S1:DiP-A, S1:OT, S1:OT-A                                   |
| 162 | Yes         | 9       | 9-A  | 1000   | exp   | 0   | unif   | wholeT_0.5  | S1:DiP, S1:DiP-A, S1:OT, S1:OT-A, S5:DiP, S5:DiP-A, S5:OT, S5:OT-A |
| 163 | Yes         | 9       | 9-A  | 1000   | exp   | Inf | last   | singleC     | S5:DiP, S5:DiP-A, S5:OT, S5:OT-A                                   |
| 164 | Yes         | 9       | 9-A  | 1000   | exp   | Inf | last   | wholeT_0.01 | J1:OT, J1:OT-A, J5:DiP, J5:DiP-A, J5:OT, J5:OT-A, S5:CBN-A         |
| 165 | Yes         | 9       | 9-A  | 1000   | exp   | Inf | last   | wholeT_0.5  | S5:DiP, S5:DiP-A, S5:OT, S5:OT-A                                   |
| 166 | Yes         | 9       | 9-A  | 1000   | exp   | Inf | unif   | singleC     | S1:OT, S1:OT-A                                                     |
| 167 | Yes         | 9       | 9-A  | 1000   | exp   | Inf | unif   | wholeT_0.01 | J1:DiP, J1:DiP-A, J1:OT, J1:OT-A                                   |
| 168 | Yes         | 9       | 9-A  | 1000   | exp   | Inf | unif   | wholeT_0.5  | S1:OT, S1:OT-A                                                     |
| 169 | Yes         | 9       | 9-A  | 1000   | McF_4 | 0   | last   | singleC     | S1:DiP, S1:DiP-A, S1:OT, S1:OT-A, S5:DiP                           |
| 170 | Yes         | 9       | 9-A  | 1000   | McF_4 | 0   | last   | wholeT_0.01 | S5:DiP, S5:DiP-A                                                   |
| 171 | Yes         | 9       | 9-A  | 1000   | McF_4 | 0   | last   | wholeT_0.5  | S1:DiP, S1:DiP-A, S1:OT, S1:OT-A                                   |
| 172 | Yes         | 9       | 9-A  | 1000   | McF_4 | 0   | unif   | singleC     | S1:DiP, S1:DiP-A, S1:OT, S1:OT-A                                   |
| 173 | Yes         | 9       | 9-A  | 1000   | McF_4 | 0   | unif   | wholeT_0.01 | S5:CBN-A, S5:DiP, S5:DiP-A, S5:OT, S5:OT-A                         |
| 174 | Yes         | 9       | 9-A  | 1000   | McF_4 | 0   | unif   | wholeT_0.5  | S1:DiP, S1:DiP-A, S1:OT, S1:OT-A                                   |
| 175 | Yes         | 9       | 9-A  | 1000   | McF_4 | Inf | last   | singleC     | S1:OT, S1:OT-A                                                     |
| 176 | Yes         | 9       | 9-A  | 1000   | McF_4 | Inf | last   | wholeT_0.01 | S5:OT                                                              |
| 177 | Yes         | 9       | 9-A  | 1000   | McF_4 | Inf | last   | wholeT_0.5  | S1:DiP, S1:DiP-A, S1:OT, S1:OT-A                                   |
| 178 | Yes         | 9       | 9-A  | 1000   | McF_4 | Inf | unif   | singleC     | S1:OT, S1:OT-A                                                     |
| 179 | Yes         | 9       | 9-A  | 1000   | McF_4 | Inf | unif   | wholeT_0.01 | S5:CBN-A, S5:DiP, S5:DiP-A, S5:OT, S5:OT-A                         |

Table 5: (continued)

|     | Conjunction | Drivers | Tree | S.Size | Model | sh  | S.Time | S.Type      | Best method(s)                                                          |
|-----|-------------|---------|------|--------|-------|-----|--------|-------------|-------------------------------------------------------------------------|
| 180 | Yes         | 9       | 9-A  | 1000   | McF_4 | Inf | unif   | wholeT_0.5  | S1:OT, S1:OT-A                                                          |
| 181 | Yes         | 9       | 9-A  | 1000   | McF_6 | 0   | last   | singleC     | S1:OT, S5:OT                                                            |
| 182 | Yes         | 9       | 9-A  | 1000   | McF_6 | 0   | last   | wholeT_0.01 | S5:DiP, S5:OT                                                           |
| 183 | Yes         | 9       | 9-A  | 1000   | McF_6 | 0   | last   | wholeT_0.5  | S1:OT, S5:OT                                                            |
| 184 | Yes         | 9       | 9-A  | 1000   | McF_6 | 0   | unif   | singleC     | S1:DiP, S1:DiP-A                                                        |
| 185 | Yes         | 9       | 9-A  | 1000   | McF_6 | 0   | unif   | wholeT_0.01 | S5:CBN, S5:CBN-A, S5:DiP, S5:DiP-A                                      |
| 186 | Yes         | 9       | 9-A  | 1000   | McF_6 | 0   | unif   | wholeT_0.5  | S1:CBN-A, S1:DiP, S1:DiP-A                                              |
| 187 | Yes         | 9       | 9-A  | 1000   | McF_6 | Inf | last   | singleC     | S5:DiP                                                                  |
| 188 | Yes         | 9       | 9-A  | 1000   | McF_6 | Inf | last   | wholeT_0.01 | S5:OT                                                                   |
| 189 | Yes         | 9       | 9-A  | 1000   | McF_6 | Inf | last   | wholeT_0.5  | S5:DiP                                                                  |
| 190 | Yes         | 9       | 9-A  | 1000   | McF_6 | Inf | unif   | singleC     | S1:CBN, S1:CBN-A, S1:DiP, S1:DiP-A,<br>S1:OT, S1:OT-A, S5:CBN, S5:CBN-A |
| 191 | Yes         | 9       | 9-A  | 1000   | McF_6 | Inf | unif   | wholeT_0.01 | J1:CBN, J1:CBN-A, S5:CBN, S5:CBN-A                                      |
| 192 | Yes         | 9       | 9-A  | 1000   | McF_6 | Inf | unif   | wholeT_0.5  | S1:CBN, S1:CBN-A, S1:DiP, S1:DiP-A,<br>S1:OT, S1:OT-A, S5:CBN, S5:CBN-A |
| 193 | Yes         | 9       | 9-A  | 200    | Bozic | 0   | last   | singleC     | S1:OT, S1:OT-A                                                          |
| 194 | Yes         | 9       | 9-A  | 200    | Bozic | 0   | last   | wholeT_0.01 | S5:OT, S5:OT-A                                                          |
| 195 | Yes         | 9       | 9-A  | 200    | Bozic | 0   | last   | wholeT_0.5  | S1:OT, S1:OT-A                                                          |
| 196 | Yes         | 9       | 9-A  | 200    | Bozic | 0   | unif   | singleC     | S1:OT, S1:OT-A, S5:DiP, S5:DiP-A,<br>S5:OT, S5:OT-A                     |
| 197 | Yes         | 9       | 9-A  | 200    | Bozic | 0   | unif   | wholeT_0.01 | J1:DiP, J1:DiP-A, J1:OT, J1:OT-A,<br>S5:DiP, S5:DiP-A, S5:OT, S5:OT-A   |
| 198 | Yes         | 9       | 9-A  | 200    | Bozic | 0   | unif   | wholeT_0.5  | S1:DiP, S1:DiP-A, S1:OT, S1:OT-A,<br>S5:DiP, S5:DiP-A, S5:OT, S5:OT-A   |
| 199 | Yes         | 9       | 9-A  | 200    | Bozic | Inf | last   | singleC     | S5:OT, S5:OT-A                                                          |
| 200 | Yes         | 9       | 9-A  | 200    | Bozic | Inf | last   | wholeT_0.01 | J5:OT, J5:OT-A                                                          |
| 201 | Yes         | 9       | 9-A  | 200    | Bozic | Inf | last   | wholeT_0.5  | S5:OT, S5:OT-A                                                          |
| 202 | Yes         | 9       | 9-A  | 200    | Bozic | Inf | unif   | singleC     | J1:DiP, J1:DiP-A, J1:OT, J1:OT-A,<br>S5:DiP, S5:DiP-A, S5:OT, S5:OT-A   |
| 203 | Yes         | 9       | 9-A  | 200    | Bozic | Inf | unif   | wholeT_0.01 | S5:OT, S5:OT-A                                                          |
| 204 | Yes         | 9       | 9-A  | 200    | Bozic | Inf | unif   | wholeT_0.5  | J1:DiP, J1:DiP-A, J1:OT, J1:OT-A,<br>S5:DiP, S5:DiP-A, S5:OT, S5:OT-A   |
| 205 | Yes         | 9       | 9-A  | 200    | exp   | 0   | last   | singleC     | S1:OT, S1:OT-A                                                          |
| 206 | Yes         | 9       | 9-A  | 200    | exp   | 0   | last   | wholeT_0.01 | S1:OT, S1:OT-A                                                          |
| 207 | Yes         | 9       | 9-A  | 200    | exp   | 0   | last   | wholeT_0.5  | S1:OT, S1:OT-A                                                          |
| 208 | Yes         | 9       | 9-A  | 200    | exp   | 0   | unif   | singleC     | S1:DiP, S1:DiP-A, S1:OT, S1:OT-A,<br>S5:DiP, S5:DiP-A, S5:OT, S5:OT-A   |
| 209 | Yes         | 9       | 9-A  | 200    | exp   | 0   | unif   | wholeT_0.01 | S1:OT, S1:OT-A, S5:DiP, S5:DiP-A,<br>S5:OT, S5:OT-A                     |

Table 5: (continued)

|     | Conjunction | Drivers | Tree | S.Size | Model | sh  | S.Time | S.Type      | Best method(s)                                                                     |
|-----|-------------|---------|------|--------|-------|-----|--------|-------------|------------------------------------------------------------------------------------|
| 210 | Yes         | 9       | 9-A  | 200    | exp   | 0   | unif   | wholeT_0.5  | S1:DiP, S1:DiP-A, S1:OT, S1:OT-A, S5:DiP, S5:DiP-A, S5:OT, S5:OT-A                 |
| 211 | Yes         | 9       | 9-A  | 200    | exp   | Inf | last   | singleC     | S5:OT, S5:OT-A                                                                     |
| 212 | Yes         | 9       | 9-A  | 200    | exp   | Inf | last   | wholeT_0.01 | J5:OT, J5:OT-A                                                                     |
| 213 | Yes         | 9       | 9-A  | 200    | exp   | Inf | last   | wholeT_0.5  | S5:OT, S5:OT-A                                                                     |
| 214 | Yes         | 9       | 9-A  | 200    | exp   | Inf | unif   | singleC     | J1:DiP, J1:DiP-A, J1:OT, J1:OT-A, S1:OT, S1:OT-A, S5:DiP, S5:DiP-A, S5:OT, S5:OT-A |
| 215 | Yes         | 9       | 9-A  | 200    | exp   | Inf | unif   | wholeT_0.01 | S5:OT, S5:OT-A                                                                     |
| 216 | Yes         | 9       | 9-A  | 200    | exp   | Inf | unif   | wholeT_0.5  | S1:OT, S1:OT-A                                                                     |
| 217 | Yes         | 9       | 9-A  | 200    | McF_4 | 0   | last   | singleC     | S5:OT, S5:OT-A                                                                     |
| 218 | Yes         | 9       | 9-A  | 200    | McF_4 | 0   | last   | wholeT_0.01 | S5:OT, S5:OT-A                                                                     |
| 219 | Yes         | 9       | 9-A  | 200    | McF_4 | 0   | last   | wholeT_0.5  | S5:OT, S5:OT-A                                                                     |
| 220 | Yes         | 9       | 9-A  | 200    | McF_4 | 0   | unif   | singleC     | S1:OT, S1:OT-A, S5:CBN-A, S5:OT, S5:OT-A                                           |
| 221 | Yes         | 9       | 9-A  | 200    | McF_4 | 0   | unif   | wholeT_0.01 | S5:CBN-A, S5:OT, S5:OT-A                                                           |
| 222 | Yes         | 9       | 9-A  | 200    | McF_4 | 0   | unif   | wholeT_0.5  | S1:OT, S1:OT-A, S5:OT, S5:OT-A                                                     |
| 223 | Yes         | 9       | 9-A  | 200    | McF_4 | Inf | last   | singleC     | S5:OT, S5:OT-A                                                                     |
| 224 | Yes         | 9       | 9-A  | 200    | McF_4 | Inf | last   | wholeT_0.01 | S5:OT                                                                              |
| 225 | Yes         | 9       | 9-A  | 200    | McF_4 | Inf | last   | wholeT_0.5  | S5:OT, S5:OT-A                                                                     |
| 226 | Yes         | 9       | 9-A  | 200    | McF_4 | Inf | unif   | singleC     | S5:OT, S5:OT-A                                                                     |
| 227 | Yes         | 9       | 9-A  | 200    | McF_4 | Inf | unif   | wholeT_0.01 | S5:OT, S5:OT-A                                                                     |
| 228 | Yes         | 9       | 9-A  | 200    | McF_4 | Inf | unif   | wholeT_0.5  | S1:OT, S1:OT-A, S5:CBN-A, S5:OT, S5:OT-A                                           |
| 229 | Yes         | 9       | 9-A  | 200    | McF_6 | 0   | last   | singleC     | S5:OT                                                                              |
| 230 | Yes         | 9       | 9-A  | 200    | McF_6 | 0   | last   | wholeT_0.01 | S5:OT                                                                              |
| 231 | Yes         | 9       | 9-A  | 200    | McF_6 | 0   | last   | wholeT_0.5  | S5:OT                                                                              |
| 232 | Yes         | 9       | 9-A  | 200    | McF_6 | 0   | unif   | singleC     | S5:CBN, S5:CBN-A                                                                   |
| 233 | Yes         | 9       | 9-A  | 200    | McF_6 | 0   | unif   | wholeT_0.01 | J1:CBN, J1:CBN-A, S5:CBN, S5:CBN-A, S5:OT, S5:OT-A                                 |
| 234 | Yes         | 9       | 9-A  | 200    | McF_6 | 0   | unif   | wholeT_0.5  | J1:CBN, J1:CBN-A, S5:CBN, S5:CBN-A, S5:OT, S5:OT-A                                 |
| 235 | Yes         | 9       | 9-A  | 200    | McF_6 | Inf | last   | singleC     | S5:OT                                                                              |
| 236 | Yes         | 9       | 9-A  | 200    | McF_6 | Inf | last   | wholeT_0.01 | S5:OT                                                                              |
| 237 | Yes         | 9       | 9-A  | 200    | McF_6 | Inf | last   | wholeT_0.5  | S5:OT                                                                              |
| 238 | Yes         | 9       | 9-A  | 200    | McF_6 | Inf | unif   | singleC     | J1:CBN, J1:CBN-A, S5:CBN, S5:CBN-A                                                 |
| 239 | Yes         | 9       | 9-A  | 200    | McF_6 | Inf | unif   | wholeT_0.01 | J1:CBN, J1:CBN-A, S5:CBN, S5:CBN-A                                                 |
| 240 | Yes         | 9       | 9-A  | 200    | McF_6 | Inf | unif   | wholeT_0.5  | S5:CBN, S5:CBN-A                                                                   |
| 241 | Yes         | 9       | 9-A  | 100    | Bozic | 0   | last   | singleC     | J1:DiP, J1:DiP-A, J1:OT, J1:OT-A, S5:DiP, S5:DiP-A, S5:OT, S5:OT-A                 |

Table 5: (continued)

|     | Conjunction | Drivers | Tree | S.Size | Model | sh  | S.Time | S.Type      | Best method(s)                                                                     |
|-----|-------------|---------|------|--------|-------|-----|--------|-------------|------------------------------------------------------------------------------------|
| 242 | Yes         | 9       | 9-A  | 100    | Bozic | 0   | last   | wholeT_0.01 | S5:OT, S5:OT-A                                                                     |
| 243 | Yes         | 9       | 9-A  | 100    | Bozic | 0   | last   | wholeT_0.5  | J1:DiP, J1:DiP-A, J1:OT, J1:OT-A, S1:OT, S1:OT-A, S5:DiP, S5:DiP-A, S5:OT, S5:OT-A |
| 244 | Yes         | 9       | 9-A  | 100    | Bozic | 0   | unif   | singleC     | S5:DiP, S5:DiP-A, S5:OT, S5:OT-A                                                   |
| 245 | Yes         | 9       | 9-A  | 100    | Bozic | 0   | unif   | wholeT_0.01 | J1:OT, J1:OT-A, S5:DiP, S5:DiP-A, S5:OT, S5:OT-A                                   |
| 246 | Yes         | 9       | 9-A  | 100    | Bozic | 0   | unif   | wholeT_0.5  | S5:DiP, S5:DiP-A, S5:OT, S5:OT-A                                                   |
| 247 | Yes         | 9       | 9-A  | 100    | Bozic | Inf | last   | singleC     | J5:OT, J5:OT-A, S5:OT, S5:OT-A                                                     |
| 248 | Yes         | 9       | 9-A  | 100    | Bozic | Inf | last   | wholeT_0.01 | J5:OT, J5:OT-A                                                                     |
| 249 | Yes         | 9       | 9-A  | 100    | Bozic | Inf | last   | wholeT_0.5  | J5:OT, J5:OT-A, S5:OT, S5:OT-A                                                     |
| 250 | Yes         | 9       | 9-A  | 100    | Bozic | Inf | unif   | singleC     | S5:DiP, S5:DiP-A, S5:OT, S5:OT-A                                                   |
| 251 | Yes         | 9       | 9-A  | 100    | Bozic | Inf | unif   | wholeT_0.01 | J5:DiP, J5:DiP-A, J5:OT, J5:OT-A, S5:OT, S5:OT-A                                   |
| 252 | Yes         | 9       | 9-A  | 100    | Bozic | Inf | unif   | wholeT_0.5  | J1:OT, J1:OT-A, S5:DiP, S5:DiP-A, S5:OT, S5:OT-A                                   |
| 253 | Yes         | 9       | 9-A  | 100    | exp   | 0   | last   | singleC     | S1:OT, S1:OT-A, S5:DiP, S5:DiP-A, S5:OT, S5:OT-A                                   |
| 254 | Yes         | 9       | 9-A  | 100    | exp   | 0   | last   | wholeT_0.01 | J1:OT, J1:OT-A, S1:OT, S1:OT-A, S5:OT, S5:OT-A                                     |
| 255 | Yes         | 9       | 9-A  | 100    | exp   | 0   | last   | wholeT_0.5  | S1:OT, S1:OT-A, S5:DiP, S5:DiP-A, S5:OT, S5:OT-A                                   |
| 256 | Yes         | 9       | 9-A  | 100    | exp   | 0   | unif   | singleC     | S1:OT, S1:OT-A, S5:DiP, S5:DiP-A, S5:OT, S5:OT-A                                   |
| 257 | Yes         | 9       | 9-A  | 100    | exp   | 0   | unif   | wholeT_0.01 | S5:DiP, S5:DiP-A, S5:OT, S5:OT-A                                                   |
| 258 | Yes         | 9       | 9-A  | 100    | exp   | 0   | unif   | wholeT_0.5  | S1:OT, S1:OT-A, S5:DiP, S5:DiP-A, S5:OT, S5:OT-A                                   |
| 259 | Yes         | 9       | 9-A  | 100    | exp   | Inf | last   | singleC     | S5:OT, S5:OT-A                                                                     |
| 260 | Yes         | 9       | 9-A  | 100    | exp   | Inf | last   | wholeT_0.01 | J5:CBN-A, J5:OT, J5:OT-A                                                           |
| 261 | Yes         | 9       | 9-A  | 100    | exp   | Inf | last   | wholeT_0.5  | S5:OT, S5:OT-A                                                                     |
| 262 | Yes         | 9       | 9-A  | 100    | exp   | Inf | unif   | singleC     | J1:OT, J1:OT-A, S5:DiP, S5:DiP-A, S5:OT, S5:OT-A                                   |
| 263 | Yes         | 9       | 9-A  | 100    | exp   | Inf | unif   | wholeT_0.01 | J5:OT, J5:OT-A, S5:OT, S5:OT-A                                                     |
| 264 | Yes         | 9       | 9-A  | 100    | exp   | Inf | unif   | wholeT_0.5  | J1:OT, J1:OT-A, S5:DiP, S5:DiP-A, S5:OT, S5:OT-A                                   |
| 265 | Yes         | 9       | 9-A  | 100    | McF_4 | 0   | last   | singleC     | S5:OT, S5:OT-A                                                                     |
| 266 | Yes         | 9       | 9-A  | 100    | McF_4 | 0   | last   | wholeT_0.01 | S5:OT, S5:OT-A                                                                     |
| 267 | Yes         | 9       | 9-A  | 100    | McF_4 | 0   | last   | wholeT_0.5  | S5:OT, S5:OT-A                                                                     |
| 268 | Yes         | 9       | 9-A  | 100    | McF_4 | 0   | unif   | singleC     | S5:CBN-A, S5:OT, S5:OT-A                                                           |
| 269 | Yes         | 9       | 9-A  | 100    | McF_4 | 0   | unif   | wholeT_0.01 | S5:OT, S5:OT-A                                                                     |

Table 5: (continued)

|     | Conjunction | Drivers | Tree | S.Size | Model | sh  | S.Time | S.Type      | Best method(s)                                                                                                                             |
|-----|-------------|---------|------|--------|-------|-----|--------|-------------|--------------------------------------------------------------------------------------------------------------------------------------------|
| 270 | Yes         | 9       | 9-A  | 100    | McF_4 | 0   | unif   | wholeT_0.5  | S5:CBN-A, S5:OT, S5:OT-A                                                                                                                   |
| 271 | Yes         | 9       | 9-A  | 100    | McF_4 | Inf | last   | singleC     | S5:OT, S5:OT-A                                                                                                                             |
| 272 | Yes         | 9       | 9-A  | 100    | McF_4 | Inf | last   | wholeT_0.01 | S5:OT                                                                                                                                      |
| 273 | Yes         | 9       | 9-A  | 100    | McF_4 | Inf | last   | wholeT_0.5  | S5:OT, S5:OT-A                                                                                                                             |
| 274 | Yes         | 9       | 9-A  | 100    | McF_4 | Inf | unif   | singleC     | S5:CBN-A, S5:OT, S5:OT-A                                                                                                                   |
| 275 | Yes         | 9       | 9-A  | 100    | McF_4 | Inf | unif   | wholeT_0.01 | S5:OT, S5:OT-A                                                                                                                             |
| 276 | Yes         | 9       | 9-A  | 100    | McF_4 | Inf | unif   | wholeT_0.5  | S5:OT, S5:OT-A                                                                                                                             |
| 277 | Yes         | 9       | 9-A  | 100    | McF_6 | 0   | last   | singleC     | S5:OT                                                                                                                                      |
| 278 | Yes         | 9       | 9-A  | 100    | McF_6 | 0   | last   | wholeT_0.01 | S5:OT                                                                                                                                      |
| 279 | Yes         | 9       | 9-A  | 100    | McF_6 | 0   | last   | wholeT_0.5  | S5:OT                                                                                                                                      |
| 280 | Yes         | 9       | 9-A  | 100    | McF_6 | 0   | unif   | singleC     | J1:CBN, J1:CBN-A, S5:CBN, S5:CBN-A, S5:OT, S5:OT-A                                                                                         |
| 281 | Yes         | 9       | 9-A  | 100    | McF_6 | 0   | unif   | wholeT_0.01 | S5:CBN, S5:CBN-A, S5:OT, S5:OT-A                                                                                                           |
| 282 | Yes         | 9       | 9-A  | 100    | McF_6 | 0   | unif   | wholeT_0.5  | J1:CBN, J1:CBN-A, S5:CBN, S5:CBN-A, S5:OT, S5:OT-A                                                                                         |
| 283 | Yes         | 9       | 9-A  | 100    | McF_6 | Inf | last   | singleC     | S5:OT                                                                                                                                      |
| 284 | Yes         | 9       | 9-A  | 100    | McF_6 | Inf | last   | wholeT_0.01 | S5:OT, S5:OT-A                                                                                                                             |
| 285 | Yes         | 9       | 9-A  | 100    | McF_6 | Inf | last   | wholeT_0.5  | S5:OT                                                                                                                                      |
| 286 | Yes         | 9       | 9-A  | 100    | McF_6 | Inf | unif   | singleC     | J1:CBN-A, S5:CBN, S5:CBN-A, S5:OT, S5:OT-A                                                                                                 |
| 287 | Yes         | 9       | 9-A  | 100    | McF_6 | Inf | unif   | wholeT_0.01 | J1:CBN, S5:CBN, S5:CBN-A, S5:OT, S5:OT-A                                                                                                   |
| 288 | Yes         | 9       | 9-A  | 100    | McF_6 | Inf | unif   | wholeT_0.5  | J1:CBN-A, S5:CBN, S5:CBN-A, S5:OT, S5:OT-A                                                                                                 |
| 289 | Yes         | 7       | 7-A  | 1000   | Bozic | 0   | last   | singleC     | S1:OT-A, S5:OT-A                                                                                                                           |
| 290 | Yes         | 7       | 7-A  | 1000   | Bozic | 0   | last   | wholeT_0.01 | J1:DiP-A, J1:OT-A, J5:DiP-A, J5:OT-A, S1:DiP-A, S1:OT-A, S5:DiP-A, S5:OT-A                                                                 |
| 291 | Yes         | 7       | 7-A  | 1000   | Bozic | 0   | last   | wholeT_0.5  | S1:OT-A                                                                                                                                    |
| 292 | Yes         | 7       | 7-A  | 1000   | Bozic | 0   | unif   | singleC     | S1:OT, S1:OT-A                                                                                                                             |
| 293 | Yes         | 7       | 7-A  | 1000   | Bozic | 0   | unif   | wholeT_0.01 | J5:CBN, J5:CBN-A, J5:DiP, J5:DiP-A, J5:OT, J5:OT-A                                                                                         |
| 294 | Yes         | 7       | 7-A  | 1000   | Bozic | 0   | unif   | wholeT_0.5  | J1:CBN, J1:CBN-A, J1:DiP, J1:DiP-A, J1:OT, J1:OT-A, J5:DiP, J5:DiP-A, S1:CBN, S1:CBN-A, S1:DiP, S1:DiP-A, S1:OT, S1:OT-A, S5:DiP, S5:DiP-A |
| 295 | Yes         | 7       | 7-A  | 1000   | Bozic | Inf | last   | singleC     | J1:DiP-A, J1:OT-A, J5:DiP-A, J5:OT-A, S5:DiP-A, S5:OT-A                                                                                    |
| 296 | Yes         | 7       | 7-A  | 1000   | Bozic | Inf | last   | wholeT_0.01 | J5:DiP-A, J5:OT-A                                                                                                                          |
| 297 | Yes         | 7       | 7-A  | 1000   | Bozic | Inf | last   | wholeT_0.5  | J1:DiP-A, J1:OT-A, J5:DiP-A, J5:OT-A, S5:DiP-A, S5:OT-A                                                                                    |

Table 5: (continued)

|     | Conjunction | Drivers | Tree | S.Size | Model | sh  | S.Time | S.Type      | Best method(s)                                                                                       |
|-----|-------------|---------|------|--------|-------|-----|--------|-------------|------------------------------------------------------------------------------------------------------|
| 298 | Yes         | 7       | 7-A  | 1000   | Bozic | Inf | unif   | singleC     | S1:CBN, S1:CBN-A                                                                                     |
| 299 | Yes         | 7       | 7-A  | 1000   | Bozic | Inf | unif   | wholeT_0.01 | J5:CBN, J5:CBN-A, J5:DiP-A, J5:OT, J5:OT-A, S5:CBN, S5:CBN-A, S5:DiP-A, S5:OT, S5:OT-A               |
| 300 | Yes         | 7       | 7-A  | 1000   | Bozic | Inf | unif   | wholeT_0.5  | S1:CBN, S1:CBN-A                                                                                     |
| 301 | Yes         | 7       | 7-A  | 1000   | exp   | 0   | last   | singleC     | S1:OT-A                                                                                              |
| 302 | Yes         | 7       | 7-A  | 1000   | exp   | 0   | last   | wholeT_0.01 | J1:OT-A, S1:OT-A, S5:OT-A                                                                            |
| 303 | Yes         | 7       | 7-A  | 1000   | exp   | 0   | last   | wholeT_0.5  | S1:OT-A                                                                                              |
| 304 | Yes         | 7       | 7-A  | 1000   | exp   | 0   | unif   | singleC     | J1:DiP, J1:DiP-A, J5:DiP, J5:DiP-A, S1:DiP, S1:DiP-A, S5:DiP, S5:DiP-A                               |
| 305 | Yes         | 7       | 7-A  | 1000   | exp   | 0   | unif   | wholeT_0.01 | J1:CBN, J1:CBN-A, J1:OT, J1:OT-A, S1:CBN-A                                                           |
| 306 | Yes         | 7       | 7-A  | 1000   | exp   | 0   | unif   | wholeT_0.5  | J1:DiP, J1:DiP-A, J5:DiP, J5:DiP-A, S1:DiP, S1:DiP-A, S5:DiP, S5:DiP-A                               |
| 307 | Yes         | 7       | 7-A  | 1000   | exp   | Inf | last   | singleC     | J1:OT-A, S5:OT-A                                                                                     |
| 308 | Yes         | 7       | 7-A  | 1000   | exp   | Inf | last   | wholeT_0.01 | J5:DiP-A, J5:OT-A, S5:DiP-A, S5:OT-A                                                                 |
| 309 | Yes         | 7       | 7-A  | 1000   | exp   | Inf | last   | wholeT_0.5  | J1:OT-A, S1:OT-A, S5:OT-A                                                                            |
| 310 | Yes         | 7       | 7-A  | 1000   | exp   | Inf | unif   | singleC     | S1:CBN, S1:CBN-A                                                                                     |
| 311 | Yes         | 7       | 7-A  | 1000   | exp   | Inf | unif   | wholeT_0.01 | J1:CBN, J1:CBN-A, J1:OT, J1:OT-A, J5:CBN, J5:CBN-A, J5:OT, J5:OT-A, S5:CBN, S5:CBN-A, S5:OT, S5:OT-A |
| 312 | Yes         | 7       | 7-A  | 1000   | exp   | Inf | unif   | wholeT_0.5  | S1:CBN, S1:CBN-A                                                                                     |
| 313 | Yes         | 7       | 7-A  | 1000   | McF_4 | 0   | last   | singleC     | J1:DiP-A, J1:OT-A, J5:DiP-A, J5:OT-A, S1:DiP-A, S1:OT-A, S5:DiP-A, S5:OT-A                           |
| 314 | Yes         | 7       | 7-A  | 1000   | McF_4 | 0   | last   | wholeT_0.01 | S5:DiP-A, S5:OT-A                                                                                    |
| 315 | Yes         | 7       | 7-A  | 1000   | McF_4 | 0   | last   | wholeT_0.5  | J1:DiP-A, J1:OT-A, J5:DiP-A, J5:OT-A, S1:DiP-A, S1:OT-A, S5:DiP-A, S5:OT-A                           |
| 316 | Yes         | 7       | 7-A  | 1000   | McF_4 | 0   | unif   | singleC     | J1:DiP-A, J1:OT, J1:OT-A, S1:DiP-A, S1:OT, S1:OT-A, S5:DiP-A, S5:OT, S5:OT-A                         |
| 317 | Yes         | 7       | 7-A  | 1000   | McF_4 | 0   | unif   | wholeT_0.01 | J1:DiP, J1:DiP-A, J1:OT, J1:OT-A, S5:DiP, S5:DiP-A, S5:OT, S5:OT-A                                   |
| 318 | Yes         | 7       | 7-A  | 1000   | McF_4 | 0   | unif   | wholeT_0.5  | J1:DiP-A, J1:OT, J1:OT-A, S1:DiP-A, S1:OT, S1:OT-A, S5:DiP-A, S5:OT, S5:OT-A                         |
| 319 | Yes         | 7       | 7-A  | 1000   | McF_4 | Inf | last   | singleC     | J1:DiP-A, J1:OT-A, J5:DiP-A, J5:OT-A, S1:DiP-A, S1:OT-A, S5:DiP-A, S5:OT-A                           |
| 320 | Yes         | 7       | 7-A  | 1000   | McF_4 | Inf | last   | wholeT_0.01 | J5:DiP-A, J5:OT-A, S5:DiP-A, S5:OT-A                                                                 |
| 321 | Yes         | 7       | 7-A  | 1000   | McF_4 | Inf | last   | wholeT_0.5  | J1:DiP-A, J1:OT-A, J5:DiP-A, J5:OT-A, S1:DiP-A, S1:OT-A, S5:DiP-A, S5:OT-A                           |



Table 5: (continued)

|     | Conjunction | Drivers | Tree | S.Size | Model | sh  | S.Time | S.Type      | Best method(s)                                                               |
|-----|-------------|---------|------|--------|-------|-----|--------|-------------|------------------------------------------------------------------------------|
| 322 | Yes         | 7       | 7-A  | 1000   | McF_4 | Inf | unif   | singleC     | J1:DiP-A, J1:OT, J1:OT-A, S1:DiP-A, S1:OT, S1:OT-A, S5:DiP-A, S5:OT, S5:OT-A |
| 323 | Yes         | 7       | 7-A  | 1000   | McF_4 | Inf | unif   | wholeT_0.01 | J1:DiP-A, J1:OT, J1:OT-A, J5:OT, J5:OT-A, S5:DiP-A, S5:OT, S5:OT-A           |
| 324 | Yes         | 7       | 7-A  | 1000   | McF_4 | Inf | unif   | wholeT_0.5  | J1:DiP-A, J1:OT, J1:OT-A, S1:DiP-A, S1:OT, S1:OT-A, S5:DiP-A, S5:OT, S5:OT-A |
| 325 | Yes         | 7       | 7-A  | 1000   | McF_6 | 0   | last   | singleC     | S5:OT-A                                                                      |
| 326 | Yes         | 7       | 7-A  | 1000   | McF_6 | 0   | last   | wholeT_0.01 | J1:OT-A, S5:DiP-A, S5:OT-A                                                   |
| 327 | Yes         | 7       | 7-A  | 1000   | McF_6 | 0   | last   | wholeT_0.5  | S5:OT-A                                                                      |
| 328 | Yes         | 7       | 7-A  | 1000   | McF_6 | 0   | unif   | singleC     | S1:CBN-A                                                                     |
| 329 | Yes         | 7       | 7-A  | 1000   | McF_6 | 0   | unif   | wholeT_0.01 | J1:DiP, J1:DiP-A, S5:DiP, S5:DiP-A                                           |
| 330 | Yes         | 7       | 7-A  | 1000   | McF_6 | 0   | unif   | wholeT_0.5  | S1:CBN-A                                                                     |
| 331 | Yes         | 7       | 7-A  | 1000   | McF_6 | Inf | last   | singleC     | S5:DiP-A, S5:OT-A                                                            |
| 332 | Yes         | 7       | 7-A  | 1000   | McF_6 | Inf | last   | wholeT_0.01 | S5:DiP-A, S5:OT-A                                                            |
| 333 | Yes         | 7       | 7-A  | 1000   | McF_6 | Inf | last   | wholeT_0.5  | J1:DiP-A, J5:DiP-A, S5:DiP-A, S5:OT-A                                        |
| 334 | Yes         | 7       | 7-A  | 1000   | McF_6 | Inf | unif   | singleC     | S1:CBN-A                                                                     |
| 335 | Yes         | 7       | 7-A  | 1000   | McF_6 | Inf | unif   | wholeT_0.01 | J1:CBN-A, S5:CBN-A                                                           |
| 336 | Yes         | 7       | 7-A  | 1000   | McF_6 | Inf | unif   | wholeT_0.5  | S1:CBN-A                                                                     |
| 337 | Yes         | 7       | 7-A  | 200    | Bozic | 0   | last   | singleC     | S1:OT-A, S5:OT-A                                                             |
| 338 | Yes         | 7       | 7-A  | 200    | Bozic | 0   | last   | wholeT_0.01 | J1:OT-A, J5:OT-A, S5:OT-A                                                    |
| 339 | Yes         | 7       | 7-A  | 200    | Bozic | 0   | last   | wholeT_0.5  | S1:OT-A, S5:OT-A                                                             |
| 340 | Yes         | 7       | 7-A  | 200    | Bozic | 0   | unif   | singleC     | J1:CBN-A, J1:OT, J1:OT-A, S1:CBN, S1:OT, S1:OT-A                             |
| 341 | Yes         | 7       | 7-A  | 200    | Bozic | 0   | unif   | wholeT_0.01 | J5:CBN, J5:OT, J5:OT-A                                                       |
| 342 | Yes         | 7       | 7-A  | 200    | Bozic | 0   | unif   | wholeT_0.5  | J1:CBN, J1:CBN-A, J1:OT, J1:OT-A, S1:CBN, S1:CBN-A, S1:OT, S1:OT-A           |
| 343 | Yes         | 7       | 7-A  | 200    | Bozic | Inf | last   | singleC     | J5:OT-A, S5:OT-A                                                             |
| 344 | Yes         | 7       | 7-A  | 200    | Bozic | Inf | last   | wholeT_0.01 | J5:OT-A                                                                      |
| 345 | Yes         | 7       | 7-A  | 200    | Bozic | Inf | last   | wholeT_0.5  | J5:OT-A, S5:OT-A                                                             |
| 346 | Yes         | 7       | 7-A  | 200    | Bozic | Inf | unif   | singleC     | J1:CBN, J1:CBN-A, S5:CBN, S5:CBN-A                                           |
| 347 | Yes         | 7       | 7-A  | 200    | Bozic | Inf | unif   | wholeT_0.01 | J5:CBN, J5:CBN-A, J5:OT, J5:OT-A, S5:CBN, S5:CBN-A, S5:OT, S5:OT-A           |
| 348 | Yes         | 7       | 7-A  | 200    | Bozic | Inf | unif   | wholeT_0.5  | J1:CBN, J1:CBN-A, S1:CBN                                                     |
| 349 | Yes         | 7       | 7-A  | 200    | exp   | 0   | last   | singleC     | S1:OT-A                                                                      |
| 350 | Yes         | 7       | 7-A  | 200    | exp   | 0   | last   | wholeT_0.01 | J1:CBN-A, J1:OT-A, S1:OT-A, S5:OT-A                                          |
| 351 | Yes         | 7       | 7-A  | 200    | exp   | 0   | last   | wholeT_0.5  | S1:OT-A                                                                      |

Table 5: (continued)

|     | Conjunction | Drivers | Tree | S.Size | Model | sh  | S.Time | S.Type      | Best method(s)                                                                                                                             |
|-----|-------------|---------|------|--------|-------|-----|--------|-------------|--------------------------------------------------------------------------------------------------------------------------------------------|
| 352 | Yes         | 7       | 7-A  | 200    | exp   | 0   | unif   | singleC     | J1:CBN, J1:CBN-A, J1:DiP, J1:DiP-A, J1:OT, J1:OT-A, J5:DiP, J5:DiP-A, S1:CBN, S1:CBN-A, S1:DiP, S1:DiP-A, S1:OT, S1:OT-A, S5:DiP, S5:DiP-A |
| 353 | Yes         | 7       | 7-A  | 200    | exp   | 0   | unif   | wholeT_0.01 | J1:CBN, J1:CBN-A, J1:OT, J1:OT-A, S1:CBN, S1:CBN-A, S1:OT, S1:OT-A                                                                         |
| 354 | Yes         | 7       | 7-A  | 200    | exp   | 0   | unif   | wholeT_0.5  | J1:DiP, J1:DiP-A, J5:DiP, J5:DiP-A, S1:DiP, S1:DiP-A, S5:DiP, S5:DiP-A                                                                     |
| 355 | Yes         | 7       | 7-A  | 200    | exp   | Inf | last   | singleC     | J1:OT-A, S5:OT-A                                                                                                                           |
| 356 | Yes         | 7       | 7-A  | 200    | exp   | Inf | last   | wholeT_0.01 | J5:CBN-A, J5:OT-A                                                                                                                          |
| 357 | Yes         | 7       | 7-A  | 200    | exp   | Inf | last   | wholeT_0.5  | S5:OT-A                                                                                                                                    |
| 358 | Yes         | 7       | 7-A  | 200    | exp   | Inf | unif   | singleC     | J1:CBN, J1:CBN-A, J1:OT, J1:OT-A, S1:CBN, S1:CBN-A, S1:OT, S1:OT-A                                                                         |
| 359 | Yes         | 7       | 7-A  | 200    | exp   | Inf | unif   | wholeT_0.01 | J5:CBN, J5:CBN-A, J5:OT, J5:OT-A, S5:CBN, S5:CBN-A, S5:OT, S5:OT-A                                                                         |
| 360 | Yes         | 7       | 7-A  | 200    | exp   | Inf | unif   | wholeT_0.5  | J1:CBN, J1:CBN-A, J1:OT, J1:OT-A, S1:CBN, S1:CBN-A, S1:OT, S1:OT-A                                                                         |
| 361 | Yes         | 7       | 7-A  | 200    | McF_4 | 0   | last   | singleC     | J1:OT-A, J5:OT-A, S5:OT-A                                                                                                                  |
| 362 | Yes         | 7       | 7-A  | 200    | McF_4 | 0   | last   | wholeT_0.01 | J1:OT-A, S5:OT-A                                                                                                                           |
| 363 | Yes         | 7       | 7-A  | 200    | McF_4 | 0   | last   | wholeT_0.5  | J1:OT-A, J5:OT-A, S5:OT-A                                                                                                                  |
| 364 | Yes         | 7       | 7-A  | 200    | McF_4 | 0   | unif   | singleC     | J1:OT, J1:OT-A, S5:OT, S5:OT-A                                                                                                             |
| 365 | Yes         | 7       | 7-A  | 200    | McF_4 | 0   | unif   | wholeT_0.01 | J1:OT, J1:OT-A, S5:OT, S5:OT-A                                                                                                             |
| 366 | Yes         | 7       | 7-A  | 200    | McF_4 | 0   | unif   | wholeT_0.5  | J1:OT, J1:OT-A, S5:OT, S5:OT-A                                                                                                             |
| 367 | Yes         | 7       | 7-A  | 200    | McF_4 | Inf | last   | singleC     | J1:OT-A, J5:OT-A, S5:OT-A                                                                                                                  |
| 368 | Yes         | 7       | 7-A  | 200    | McF_4 | Inf | last   | wholeT_0.01 | J5:OT-A, S5:OT-A                                                                                                                           |
| 369 | Yes         | 7       | 7-A  | 200    | McF_4 | Inf | last   | wholeT_0.5  | J1:OT-A, J5:OT-A, S5:OT-A                                                                                                                  |
| 370 | Yes         | 7       | 7-A  | 200    | McF_4 | Inf | unif   | singleC     | J1:OT, J1:OT-A, S5:OT, S5:OT-A                                                                                                             |
| 371 | Yes         | 7       | 7-A  | 200    | McF_4 | Inf | unif   | wholeT_0.01 | J1:OT, J1:OT-A, S5:OT, S5:OT-A                                                                                                             |
| 372 | Yes         | 7       | 7-A  | 200    | McF_4 | Inf | unif   | wholeT_0.5  | J1:OT, J1:OT-A, S5:OT, S5:OT-A                                                                                                             |
| 373 | Yes         | 7       | 7-A  | 200    | McF_6 | 0   | last   | singleC     | S5:OT-A                                                                                                                                    |
| 374 | Yes         | 7       | 7-A  | 200    | McF_6 | 0   | last   | wholeT_0.01 | S5:OT-A                                                                                                                                    |
| 375 | Yes         | 7       | 7-A  | 200    | McF_6 | 0   | last   | wholeT_0.5  | S5:OT-A                                                                                                                                    |
| 376 | Yes         | 7       | 7-A  | 200    | McF_6 | 0   | unif   | singleC     | J1:CBN-A, J1:OT, J1:OT-A, S5:CBN-A, S5:OT, S5:OT-A                                                                                         |
| 377 | Yes         | 7       | 7-A  | 200    | McF_6 | 0   | unif   | wholeT_0.01 | J1:CBN-A, J1:OT, J1:OT-A, S5:CBN-A, S5:OT, S5:OT-A                                                                                         |
| 378 | Yes         | 7       | 7-A  | 200    | McF_6 | 0   | unif   | wholeT_0.5  | J1:CBN-A, S5:CBN-A                                                                                                                         |
| 379 | Yes         | 7       | 7-A  | 200    | McF_6 | Inf | last   | singleC     | S5:OT-A                                                                                                                                    |
| 380 | Yes         | 7       | 7-A  | 200    | McF_6 | Inf | last   | wholeT_0.01 | S5:OT-A                                                                                                                                    |
| 381 | Yes         | 7       | 7-A  | 200    | McF_6 | Inf | last   | wholeT_0.5  | S5:OT-A                                                                                                                                    |

Table 5: (continued)

|     | Conjunction | Drivers | Tree | S.Size | Model | sh  | S.Time | S.Type      | Best method(s)                                                                                                                                           |
|-----|-------------|---------|------|--------|-------|-----|--------|-------------|----------------------------------------------------------------------------------------------------------------------------------------------------------|
| 382 | Yes         | 7       | 7-A  | 200    | McF_6 | Inf | unif   | singleC     | J1:CBN-A, J1:OT, J1:OT-A, S5:CBN-A, S5:OT, S5:OT-A                                                                                                       |
| 383 | Yes         | 7       | 7-A  | 200    | McF_6 | Inf | unif   | wholeT_0.01 | J1:CBN-A, S5:CBN-A, S5:OT-A                                                                                                                              |
| 384 | Yes         | 7       | 7-A  | 200    | McF_6 | Inf | unif   | wholeT_0.5  | J1:CBN-A, J1:OT, J1:OT-A, S5:CBN-A                                                                                                                       |
| 385 | Yes         | 7       | 7-A  | 100    | Bozic | 0   | last   | singleC     | S5:OT-A                                                                                                                                                  |
| 386 | Yes         | 7       | 7-A  | 100    | Bozic | 0   | last   | wholeT_0.01 | J5:OT-A, S5:OT-A                                                                                                                                         |
| 387 | Yes         | 7       | 7-A  | 100    | Bozic | 0   | last   | wholeT_0.5  | S5:OT-A                                                                                                                                                  |
| 388 | Yes         | 7       | 7-A  | 100    | Bozic | 0   | unif   | singleC     | J1:CBN, J1:CBN-A, J1:OT, J1:OT-A, J5:DiP, J5:DiP-A, S1:OT, S1:OT-A, S5:DiP, S5:DiP-A                                                                     |
| 389 | Yes         | 7       | 7-A  | 100    | Bozic | 0   | unif   | wholeT_0.01 | J5:CBN, J5:CBN-A, J5:OT, J5:OT-A, S5:CBN-A                                                                                                               |
| 390 | Yes         | 7       | 7-A  | 100    | Bozic | 0   | unif   | wholeT_0.5  | J1:CBN, J1:CBN-A, J1:OT, J1:OT-A, J5:DiP, J5:DiP-A, S1:OT, S1:OT-A, S5:DiP, S5:DiP-A                                                                     |
| 391 | Yes         | 7       | 7-A  | 100    | Bozic | Inf | last   | singleC     | J5:OT-A                                                                                                                                                  |
| 392 | Yes         | 7       | 7-A  | 100    | Bozic | Inf | last   | wholeT_0.01 | J5:OT-A                                                                                                                                                  |
| 393 | Yes         | 7       | 7-A  | 100    | Bozic | Inf | last   | wholeT_0.5  | J5:OT-A, S5:OT-A                                                                                                                                         |
| 394 | Yes         | 7       | 7-A  | 100    | Bozic | Inf | unif   | singleC     | J1:CBN, J1:CBN-A, S5:CBN, S5:CBN-A                                                                                                                       |
| 395 | Yes         | 7       | 7-A  | 100    | Bozic | Inf | unif   | wholeT_0.01 | J5:CBN, J5:CBN-A, J5:OT, J5:OT-A, S5:CBN-A, S5:OT, S5:OT-A                                                                                               |
| 396 | Yes         | 7       | 7-A  | 100    | Bozic | Inf | unif   | wholeT_0.5  | J1:CBN, J1:CBN-A, S5:CBN, S5:CBN-A                                                                                                                       |
| 397 | Yes         | 7       | 7-A  | 100    | exp   | 0   | last   | singleC     | S1:OT-A                                                                                                                                                  |
| 398 | Yes         | 7       | 7-A  | 100    | exp   | 0   | last   | wholeT_0.01 | J1:CBN-A, J1:OT-A, J5:OT-A, S1:OT-A, S5:OT-A                                                                                                             |
| 399 | Yes         | 7       | 7-A  | 100    | exp   | 0   | last   | wholeT_0.5  | S1:OT-A                                                                                                                                                  |
| 400 | Yes         | 7       | 7-A  | 100    | exp   | 0   | unif   | singleC     | J1:CBN, J1:CBN-A, J1:OT, J1:OT-A, J5:DiP, J5:DiP-A, S1:CBN, S1:CBN-A, S1:OT, S1:OT-A, S5:DiP, S5:DiP-A                                                   |
| 401 | Yes         | 7       | 7-A  | 100    | exp   | 0   | unif   | wholeT_0.01 | J1:CBN, J1:CBN-A, J1:OT, J1:OT-A, J5:CBN, J5:CBN-A, J5:DiP, J5:DiP-A, J5:OT, J5:OT-A, S1:OT, S1:OT-A, S5:CBN, S5:CBN-A, S5:DiP, S5:DiP-A, S5:OT, S5:OT-A |
| 402 | Yes         | 7       | 7-A  | 100    | exp   | 0   | unif   | wholeT_0.5  | J1:CBN, J1:CBN-A, J1:OT, J1:OT-A, J5:DiP, J5:DiP-A, S1:CBN, S1:CBN-A, S1:OT, S1:OT-A, S5:DiP, S5:DiP-A                                                   |
| 403 | Yes         | 7       | 7-A  | 100    | exp   | Inf | last   | singleC     | S5:OT-A                                                                                                                                                  |
| 404 | Yes         | 7       | 7-A  | 100    | exp   | Inf | last   | wholeT_0.01 | J5:OT-A                                                                                                                                                  |
| 405 | Yes         | 7       | 7-A  | 100    | exp   | Inf | last   | wholeT_0.5  | S5:OT-A                                                                                                                                                  |

Table 5: (continued)

|     | Conjunction | Drivers | Tree | S.Size | Model | sh  | S.Time | S.Type      | Best method(s)                                                                                                       |
|-----|-------------|---------|------|--------|-------|-----|--------|-------------|----------------------------------------------------------------------------------------------------------------------|
| 406 | Yes         | 7       | 7-A  | 100    | exp   | Inf | unif   | singleC     | J1:CBN, J1:CBN-A, J1:OT, J1:OT-A, J5:CBN, J5:CBN-A, J5:OT, J5:OT-A, S1:OT, S1:OT-A, S5:CBN, S5:CBN-A, S5:OT, S5:OT-A |
| 407 | Yes         | 7       | 7-A  | 100    | exp   | Inf | unif   | wholeT_0.01 | J5:CBN, J5:CBN-A, J5:OT, J5:OT-A, S5:OT, S5:OT-A                                                                     |
| 408 | Yes         | 7       | 7-A  | 100    | exp   | Inf | unif   | wholeT_0.5  | J1:CBN, J1:CBN-A, J1:OT, J1:OT-A, S1:CBN-A, S1:OT, S1:OT-A                                                           |
| 409 | Yes         | 7       | 7-A  | 100    | McF_4 | 0   | last   | singleC     | J1:OT-A, J5:OT-A, S5:OT-A                                                                                            |
| 410 | Yes         | 7       | 7-A  | 100    | McF_4 | 0   | last   | wholeT_0.01 | S5:OT-A                                                                                                              |
| 411 | Yes         | 7       | 7-A  | 100    | McF_4 | 0   | last   | wholeT_0.5  | J1:OT-A, J5:OT-A, S5:OT-A                                                                                            |
| 412 | Yes         | 7       | 7-A  | 100    | McF_4 | 0   | unif   | singleC     | J1:OT, J1:OT-A, S5:OT, S5:OT-A                                                                                       |
| 413 | Yes         | 7       | 7-A  | 100    | McF_4 | 0   | unif   | wholeT_0.01 | J1:OT-A, S5:OT, S5:OT-A                                                                                              |
| 414 | Yes         | 7       | 7-A  | 100    | McF_4 | 0   | unif   | wholeT_0.5  | J1:OT, J1:OT-A, S5:OT, S5:OT-A                                                                                       |
| 415 | Yes         | 7       | 7-A  | 100    | McF_4 | Inf | last   | singleC     | J1:OT-A, J5:OT-A, S5:OT-A                                                                                            |
| 416 | Yes         | 7       | 7-A  | 100    | McF_4 | Inf | last   | wholeT_0.01 | J5:OT-A, S5:OT-A                                                                                                     |
| 417 | Yes         | 7       | 7-A  | 100    | McF_4 | Inf | last   | wholeT_0.5  | J5:OT-A, S5:OT-A                                                                                                     |
| 418 | Yes         | 7       | 7-A  | 100    | McF_4 | Inf | unif   | singleC     | J1:OT, J1:OT-A, S5:OT, S5:OT-A                                                                                       |
| 419 | Yes         | 7       | 7-A  | 100    | McF_4 | Inf | unif   | wholeT_0.01 | J1:OT, J1:OT-A, J5:OT-A, S5:OT, S5:OT-A                                                                              |
| 420 | Yes         | 7       | 7-A  | 100    | McF_4 | Inf | unif   | wholeT_0.5  | J1:OT, J1:OT-A, J5:OT, J5:OT-A, S5:OT, S5:OT-A                                                                       |
| 421 | Yes         | 7       | 7-A  | 100    | McF_6 | 0   | last   | singleC     | S5:OT-A                                                                                                              |
| 422 | Yes         | 7       | 7-A  | 100    | McF_6 | 0   | last   | wholeT_0.01 | S5:OT-A                                                                                                              |
| 423 | Yes         | 7       | 7-A  | 100    | McF_6 | 0   | last   | wholeT_0.5  | S5:OT-A                                                                                                              |
| 424 | Yes         | 7       | 7-A  | 100    | McF_6 | 0   | unif   | singleC     | J1:CBN-A, S5:CBN, S5:CBN-A, S5:OT-A                                                                                  |
| 425 | Yes         | 7       | 7-A  | 100    | McF_6 | 0   | unif   | wholeT_0.01 | J5:CBN-A, S5:CBN, S5:CBN-A, S5:OT, S5:OT-A                                                                           |
| 426 | Yes         | 7       | 7-A  | 100    | McF_6 | 0   | unif   | wholeT_0.5  | J1:CBN-A, S5:CBN-A                                                                                                   |
| 427 | Yes         | 7       | 7-A  | 100    | McF_6 | Inf | last   | singleC     | S5:OT-A                                                                                                              |
| 428 | Yes         | 7       | 7-A  | 100    | McF_6 | Inf | last   | wholeT_0.01 | S5:OT-A                                                                                                              |
| 429 | Yes         | 7       | 7-A  | 100    | McF_6 | Inf | last   | wholeT_0.5  | S5:OT-A                                                                                                              |
| 430 | Yes         | 7       | 7-A  | 100    | McF_6 | Inf | unif   | singleC     | S5:CBN-A                                                                                                             |
| 431 | Yes         | 7       | 7-A  | 100    | McF_6 | Inf | unif   | wholeT_0.01 | S5:CBN-A                                                                                                             |
| 432 | Yes         | 7       | 7-A  | 100    | McF_6 | Inf | unif   | wholeT_0.5  | J1:CBN-A, J1:OT-A, J5:CBN-A, S5:CBN-A, S5:OT-A                                                                       |
| 433 | No          | 11      | 11-B | 1000   | Bozic | 0   | last   | singleC     | S1:OT, S1:OT-A                                                                                                       |
| 434 | No          | 11      | 11-B | 1000   | Bozic | 0   | last   | wholeT_0.01 | S1:DiP, S1:DiP-A, S5:DiP, S5:DiP-A                                                                                   |
| 435 | No          | 11      | 11-B | 1000   | Bozic | 0   | last   | wholeT_0.5  | S1:OT, S1:OT-A                                                                                                       |

Table 5: (continued)

|     | Conjunction | Drivers | Tree | S.Size | Model | sh  | S.Time | S.Type      | Best method(s)                                                                                                                   |
|-----|-------------|---------|------|--------|-------|-----|--------|-------------|----------------------------------------------------------------------------------------------------------------------------------|
| 436 | No          | 11      | 11-B | 1000   | Bozic | 0   | unif   | singleC     | S1:DiP, S1:DiP-A, S1:OT, S1:OT-A, S5:DiP, S5:DiP-A, S5:OT, S5:OT-A                                                               |
| 437 | No          | 11      | 11-B | 1000   | Bozic | 0   | unif   | wholeT_0.01 | J1:CBN-A, S1:OT, S1:OT-A, S5:DiP, S5:DiP-A, S5:OT, S5:OT-A                                                                       |
| 438 | No          | 11      | 11-B | 1000   | Bozic | 0   | unif   | wholeT_0.5  | S1:DiP, S1:DiP-A, S1:OT, S1:OT-A, S5:DiP, S5:DiP-A, S5:OT, S5:OT-A                                                               |
| 439 | No          | 11      | 11-B | 1000   | Bozic | Inf | last   | singleC     | S5:DiP, S5:DiP-A, S5:OT, S5:OT-A                                                                                                 |
| 440 | No          | 11      | 11-B | 1000   | Bozic | Inf | last   | wholeT_0.01 | J1:DiP, J1:DiP-A, J1:OT, J1:OT-A, J5:DiP, J5:DiP-A, J5:OT, J5:OT-A                                                               |
| 441 | No          | 11      | 11-B | 1000   | Bozic | Inf | last   | wholeT_0.5  | S5:DiP, S5:DiP-A, S5:OT, S5:OT-A                                                                                                 |
| 442 | No          | 11      | 11-B | 1000   | Bozic | Inf | unif   | singleC     | S1:CBN, S1:CBN-A, S1:DiP-A, S1:OT, S1:OT-A                                                                                       |
| 443 | No          | 11      | 11-B | 1000   | Bozic | Inf | unif   | wholeT_0.01 | J1:CBN-A, J1:DiP, J1:DiP-A, J1:OT, J1:OT-A, J5:DiP, J5:DiP-A, J5:OT, J5:OT-A, S5:CBN, S5:CBN-A, S5:DiP, S5:DiP-A, S5:OT, S5:OT-A |
| 444 | No          | 11      | 11-B | 1000   | Bozic | Inf | unif   | wholeT_0.5  | S1:CBN, S1:CBN-A, S1:OT, S1:OT-A                                                                                                 |
| 445 | No          | 11      | 11-B | 1000   | exp   | 0   | last   | singleC     | S1:OT, S1:OT-A                                                                                                                   |
| 446 | No          | 11      | 11-B | 1000   | exp   | 0   | last   | wholeT_0.01 | S1:DiP-A, S1:OT, S1:OT-A, S5:DiP-A, S5:OT, S5:OT-A                                                                               |
| 447 | No          | 11      | 11-B | 1000   | exp   | 0   | last   | wholeT_0.5  | S1:OT, S1:OT-A                                                                                                                   |
| 448 | No          | 11      | 11-B | 1000   | exp   | 0   | unif   | singleC     | S1:DiP, S1:DiP-A, S1:OT, S1:OT-A, S5:DiP, S5:DiP-A, S5:OT, S5:OT-A                                                               |
| 449 | No          | 11      | 11-B | 1000   | exp   | 0   | unif   | wholeT_0.01 | S1:CBN-A, S1:DiP-A, S1:OT, S1:OT-A                                                                                               |
| 450 | No          | 11      | 11-B | 1000   | exp   | 0   | unif   | wholeT_0.5  | S1:DiP, S1:DiP-A, S1:OT, S1:OT-A, S5:DiP, S5:DiP-A, S5:OT, S5:OT-A                                                               |
| 451 | No          | 11      | 11-B | 1000   | exp   | Inf | last   | singleC     | S5:DiP, S5:DiP-A, S5:OT, S5:OT-A                                                                                                 |
| 452 | No          | 11      | 11-B | 1000   | exp   | Inf | last   | wholeT_0.01 | S5:DiP, S5:DiP-A, S5:OT, S5:OT-A                                                                                                 |
| 453 | No          | 11      | 11-B | 1000   | exp   | Inf | last   | wholeT_0.5  | S5:DiP, S5:DiP-A, S5:OT, S5:OT-A                                                                                                 |
| 454 | No          | 11      | 11-B | 1000   | exp   | Inf | unif   | singleC     | S1:CBN, S1:CBN-A, S1:OT, S1:OT-A                                                                                                 |
| 455 | No          | 11      | 11-B | 1000   | exp   | Inf | unif   | wholeT_0.01 | S5:DiP, S5:DiP-A, S5:OT, S5:OT-A                                                                                                 |
| 456 | No          | 11      | 11-B | 1000   | exp   | Inf | unif   | wholeT_0.5  | S1:CBN, S1:CBN-A, S1:OT, S1:OT-A                                                                                                 |
| 457 | No          | 11      | 11-B | 1000   | McF_4 | 0   | last   | singleC     | S1:DiP-A, S1:OT, S1:OT-A                                                                                                         |
| 458 | No          | 11      | 11-B | 1000   | McF_4 | 0   | last   | wholeT_0.01 | S1:DiP, S1:DiP-A, S1:OT, S1:OT-A, S5:DiP, S5:DiP-A, S5:OT, S5:OT-A                                                               |
| 459 | No          | 11      | 11-B | 1000   | McF_4 | 0   | last   | wholeT_0.5  | S1:DiP-A, S1:OT, S1:OT-A                                                                                                         |
| 460 | No          | 11      | 11-B | 1000   | McF_4 | 0   | unif   | singleC     | S1:DiP, S1:DiP-A, S1:OT, S1:OT-A                                                                                                 |
| 461 | No          | 11      | 11-B | 1000   | McF_4 | 0   | unif   | wholeT_0.01 | S1:OT, S1:OT-A                                                                                                                   |
| 462 | No          | 11      | 11-B | 1000   | McF_4 | 0   | unif   | wholeT_0.5  | S1:DiP, S1:DiP-A, S1:OT, S1:OT-A                                                                                                 |
| 463 | No          | 11      | 11-B | 1000   | McF_4 | Inf | last   | singleC     | S1:OT, S1:OT-A                                                                                                                   |

Table 5: (continued)

|     | Conjunction | Drivers | Tree | S.Size | Model | sh  | S.Time | S.Type      | Best method(s)                                                        |
|-----|-------------|---------|------|--------|-------|-----|--------|-------------|-----------------------------------------------------------------------|
| 464 | No          | 11      | 11-B | 1000   | McF_4 | Inf | last   | wholeT_0.01 | S5:DiP, S5:DiP-A, S5:OT, S5:OT-A                                      |
| 465 | No          | 11      | 11-B | 1000   | McF_4 | Inf | last   | wholeT_0.5  | S1:DiP-A, S1:OT, S1:OT-A                                              |
| 466 | No          | 11      | 11-B | 1000   | McF_4 | Inf | unif   | singleC     | S1:OT, S1:OT-A                                                        |
| 467 | No          | 11      | 11-B | 1000   | McF_4 | Inf | unif   | wholeT_0.01 | S5:DiP, S5:DiP-A, S5:OT, S5:OT-A                                      |
| 468 | No          | 11      | 11-B | 1000   | McF_4 | Inf | unif   | wholeT_0.5  | S1:OT, S1:OT-A                                                        |
| 469 | No          | 11      | 11-B | 1000   | McF_6 | 0   | last   | singleC     | S5:DiP, S5:OT                                                         |
| 470 | No          | 11      | 11-B | 1000   | McF_6 | 0   | last   | wholeT_0.01 | S5:DiP, S5:OT                                                         |
| 471 | No          | 11      | 11-B | 1000   | McF_6 | 0   | last   | wholeT_0.5  | S5:DiP, S5:OT                                                         |
| 472 | No          | 11      | 11-B | 1000   | McF_6 | 0   | unif   | singleC     | S1:DiP, S1:DiP-A, S1:OT, S1:OT-A                                      |
| 473 | No          | 11      | 11-B | 1000   | McF_6 | 0   | unif   | wholeT_0.01 | S1:DiP, S1:DiP-A, S1:OT, S1:OT-A                                      |
| 474 | No          | 11      | 11-B | 1000   | McF_6 | 0   | unif   | wholeT_0.5  | S1:DiP, S1:DiP-A, S1:OT, S1:OT-A                                      |
| 475 | No          | 11      | 11-B | 1000   | McF_6 | Inf | last   | singleC     | S5:DiP, S5:OT                                                         |
| 476 | No          | 11      | 11-B | 1000   | McF_6 | Inf | last   | wholeT_0.01 | S5:OT                                                                 |
| 477 | No          | 11      | 11-B | 1000   | McF_6 | Inf | last   | wholeT_0.5  | S1:DiP, S1:OT, S5:DiP, S5:OT                                          |
| 478 | No          | 11      | 11-B | 1000   | McF_6 | Inf | unif   | singleC     | S1:DiP, S1:DiP-A                                                      |
| 479 | No          | 11      | 11-B | 1000   | McF_6 | Inf | unif   | wholeT_0.01 | S1:DiP, S1:DiP-A                                                      |
| 480 | No          | 11      | 11-B | 1000   | McF_6 | Inf | unif   | wholeT_0.5  | S1:DiP, S1:DiP-A, S1:OT, S1:OT-A                                      |
| 481 | No          | 11      | 11-B | 200    | Bozic | 0   | last   | singleC     | S1:OT, S1:OT-A                                                        |
| 482 | No          | 11      | 11-B | 200    | Bozic | 0   | last   | wholeT_0.01 | J1:OT, J1:OT-A, J5:OT, J5:OT-A,<br>S5:OT, S5:OT-A                     |
| 483 | No          | 11      | 11-B | 200    | Bozic | 0   | last   | wholeT_0.5  | S1:OT, S1:OT-A                                                        |
| 484 | No          | 11      | 11-B | 200    | Bozic | 0   | unif   | singleC     | S1:OT, S1:OT-A                                                        |
| 485 | No          | 11      | 11-B | 200    | Bozic | 0   | unif   | wholeT_0.01 | J1:CBN-A, S5:CBN-A, S5:DiP, S5:DiP-A,<br>S5:OT, S5:OT-A               |
| 486 | No          | 11      | 11-B | 200    | Bozic | 0   | unif   | wholeT_0.5  | S1:OT, S1:OT-A, S5:DiP, S5:DiP-A,<br>S5:OT, S5:OT-A                   |
| 487 | No          | 11      | 11-B | 200    | Bozic | Inf | last   | singleC     | S5:OT, S5:OT-A                                                        |
| 488 | No          | 11      | 11-B | 200    | Bozic | Inf | last   | wholeT_0.01 | J5:OT, J5:OT-A                                                        |
| 489 | No          | 11      | 11-B | 200    | Bozic | Inf | last   | wholeT_0.5  | S5:OT, S5:OT-A                                                        |
| 490 | No          | 11      | 11-B | 200    | Bozic | Inf | unif   | singleC     | J1:CBN, J1:CBN-A, J1:OT, J1:OT-A,<br>S5:DiP, S5:DiP-A, S5:OT, S5:OT-A |
| 491 | No          | 11      | 11-B | 200    | Bozic | Inf | unif   | wholeT_0.01 | J5:CBN-A, J5:OT, J5:OT-A, S5:CBN,<br>S5:CBN-A, S5:OT, S5:OT-A         |
| 492 | No          | 11      | 11-B | 200    | Bozic | Inf | unif   | wholeT_0.5  | J1:CBN, J1:CBN-A, J1:OT, J1:OT-A,<br>S5:OT, S5:OT-A                   |
| 493 | No          | 11      | 11-B | 200    | exp   | 0   | last   | singleC     | S1:OT, S1:OT-A                                                        |
| 494 | No          | 11      | 11-B | 200    | exp   | 0   | last   | wholeT_0.01 | S1:OT, S1:OT-A, S5:OT, S5:OT-A                                        |
| 495 | No          | 11      | 11-B | 200    | exp   | 0   | last   | wholeT_0.5  | S1:OT, S1:OT-A                                                        |
| 496 | No          | 11      | 11-B | 200    | exp   | 0   | unif   | singleC     | S1:DiP, S1:DiP-A, S1:OT, S1:OT-A,<br>S5:DiP, S5:DiP-A, S5:OT, S5:OT-A |

Table 5: (continued)

|     | Conjunction | Drivers | Tree | S.Size | Model | sh  | S.Time | S.Type      | Best method(s)                                                        |
|-----|-------------|---------|------|--------|-------|-----|--------|-------------|-----------------------------------------------------------------------|
| 497 | No          | 11      | 11-B | 200    | exp   | 0   | unif   | wholeT_0.01 | S1:OT, S1:OT-A                                                        |
| 498 | No          | 11      | 11-B | 200    | exp   | 0   | unif   | wholeT_0.5  | S1:DiP, S1:DiP-A, S1:OT, S1:OT-A,<br>S5:DiP, S5:DiP-A, S5:OT, S5:OT-A |
| 499 | No          | 11      | 11-B | 200    | exp   | Inf | last   | singleC     | S5:OT, S5:OT-A                                                        |
| 500 | No          | 11      | 11-B | 200    | exp   | Inf | last   | wholeT_0.01 | J5:OT, J5:OT-A                                                        |
| 501 | No          | 11      | 11-B | 200    | exp   | Inf | last   | wholeT_0.5  | S5:OT, S5:OT-A                                                        |
| 502 | No          | 11      | 11-B | 200    | exp   | Inf | unif   | singleC     | J1:OT, J1:OT-A, S1:OT, S1:OT-A                                        |
| 503 | No          | 11      | 11-B | 200    | exp   | Inf | unif   | wholeT_0.01 | S5:CBN-A, S5:OT, S5:OT-A                                              |
| 504 | No          | 11      | 11-B | 200    | exp   | Inf | unif   | wholeT_0.5  | S1:OT, S1:OT-A                                                        |
| 505 | No          | 11      | 11-B | 200    | McF_4 | 0   | last   | singleC     | S1:OT, S1:OT-A, S5:OT, S5:OT-A                                        |
| 506 | No          | 11      | 11-B | 200    | McF_4 | 0   | last   | wholeT_0.01 | S5:OT, S5:OT-A                                                        |
| 507 | No          | 11      | 11-B | 200    | McF_4 | 0   | last   | wholeT_0.5  | S1:OT, S1:OT-A, S5:OT, S5:OT-A                                        |
| 508 | No          | 11      | 11-B | 200    | McF_4 | 0   | unif   | singleC     | S1:OT, S1:OT-A, S5:OT, S5:OT-A                                        |
| 509 | No          | 11      | 11-B | 200    | McF_4 | 0   | unif   | wholeT_0.01 | S5:OT, S5:OT-A                                                        |
| 510 | No          | 11      | 11-B | 200    | McF_4 | 0   | unif   | wholeT_0.5  | S1:OT, S1:OT-A, S5:CBN-A, S5:OT,<br>S5:OT-A                           |
| 511 | No          | 11      | 11-B | 200    | McF_4 | Inf | last   | singleC     | S1:OT, S1:OT-A, S5:OT, S5:OT-A                                        |
| 512 | No          | 11      | 11-B | 200    | McF_4 | Inf | last   | wholeT_0.01 | S5:OT, S5:OT-A                                                        |
| 513 | No          | 11      | 11-B | 200    | McF_4 | Inf | last   | wholeT_0.5  | S1:OT, S1:OT-A                                                        |
| 514 | No          | 11      | 11-B | 200    | McF_4 | Inf | unif   | singleC     | S1:OT, S1:OT-A, S5:CBN-A, S5:OT,<br>S5:OT-A                           |
| 515 | No          | 11      | 11-B | 200    | McF_4 | Inf | unif   | wholeT_0.01 | S5:CBN-A, S5:OT, S5:OT-A                                              |
| 516 | No          | 11      | 11-B | 200    | McF_4 | Inf | unif   | wholeT_0.5  | S1:OT, S1:OT-A, S5:OT, S5:OT-A                                        |
| 517 | No          | 11      | 11-B | 200    | McF_6 | 0   | last   | singleC     | S5:OT                                                                 |
| 518 | No          | 11      | 11-B | 200    | McF_6 | 0   | last   | wholeT_0.01 | S5:OT                                                                 |
| 519 | No          | 11      | 11-B | 200    | McF_6 | 0   | last   | wholeT_0.5  | S5:OT                                                                 |
| 520 | No          | 11      | 11-B | 200    | McF_6 | 0   | unif   | singleC     | J1:CBN-A, S1:OT, S1:OT-A, S5:CBN-A,<br>S5:OT, S5:OT-A                 |
| 521 | No          | 11      | 11-B | 200    | McF_6 | 0   | unif   | wholeT_0.01 | S1:OT, S1:OT-A, S5:CBN, S5:OT,<br>S5:OT-A                             |
| 522 | No          | 11      | 11-B | 200    | McF_6 | 0   | unif   | wholeT_0.5  | S1:OT, S1:OT-A, S5:CBN, S5:OT,<br>S5:OT-A                             |
| 523 | No          | 11      | 11-B | 200    | McF_6 | Inf | last   | singleC     | S5:OT                                                                 |
| 524 | No          | 11      | 11-B | 200    | McF_6 | Inf | last   | wholeT_0.01 | S5:OT                                                                 |
| 525 | No          | 11      | 11-B | 200    | McF_6 | Inf | last   | wholeT_0.5  | S5:OT                                                                 |
| 526 | No          | 11      | 11-B | 200    | McF_6 | Inf | unif   | singleC     | J1:CBN-A, S1:OT, S1:OT-A, S5:CBN,<br>S5:CBN-A, S5:OT, S5:OT-A         |
| 527 | No          | 11      | 11-B | 200    | McF_6 | Inf | unif   | wholeT_0.01 | S5:CBN, S5:CBN-A, S5:OT, S5:OT-A                                      |
| 528 | No          | 11      | 11-B | 200    | McF_6 | Inf | unif   | wholeT_0.5  | J1:CBN-A, S1:OT, S1:OT-A, S5:CBN,<br>S5:CBN-A, S5:OT, S5:OT-A         |

Table 5: (continued)

|     | Conjunction | Drivers | Tree | S.Size | Model | sh  | S.Time | S.Type      | Best method(s)                                                   |
|-----|-------------|---------|------|--------|-------|-----|--------|-------------|------------------------------------------------------------------|
| 529 | No          | 11      | 11-B | 100    | Bozic | 0   | last   | singleC     | S5:OT, S5:OT-A                                                   |
| 530 | No          | 11      | 11-B | 100    | Bozic | 0   | last   | wholeT_0.01 | J1:OT, J1:OT-A, J5:CBN-A, J5:OT, J5:OT-A, S5:OT, S5:OT-A         |
| 531 | No          | 11      | 11-B | 100    | Bozic | 0   | last   | wholeT_0.5  | S1:OT, S1:OT-A, S5:DiP, S5:DiP-A, S5:OT, S5:OT-A                 |
| 532 | No          | 11      | 11-B | 100    | Bozic | 0   | unif   | singleC     | J1:OT, J1:OT-A, S5:DiP, S5:DiP-A, S5:OT, S5:OT-A                 |
| 533 | No          | 11      | 11-B | 100    | Bozic | 0   | unif   | wholeT_0.01 | S5:CBN, S5:OT, S5:OT-A                                           |
| 534 | No          | 11      | 11-B | 100    | Bozic | 0   | unif   | wholeT_0.5  | S5:DiP, S5:DiP-A, S5:OT, S5:OT-A                                 |
| 535 | No          | 11      | 11-B | 100    | Bozic | Inf | last   | singleC     | S5:OT, S5:OT-A                                                   |
| 536 | No          | 11      | 11-B | 100    | Bozic | Inf | last   | wholeT_0.01 | J5:OT, J5:OT-A                                                   |
| 537 | No          | 11      | 11-B | 100    | Bozic | Inf | last   | wholeT_0.5  | J5:OT, J5:OT-A, S5:OT, S5:OT-A                                   |
| 538 | No          | 11      | 11-B | 100    | Bozic | Inf | unif   | singleC     | J1:OT, J1:OT-A, S5:CBN-A, S5:OT, S5:OT-A                         |
| 539 | No          | 11      | 11-B | 100    | Bozic | Inf | unif   | wholeT_0.01 | J5:CBN, J5:CBN-A, J5:OT, J5:OT-A, S5:CBN-A, S5:OT, S5:OT-A       |
| 540 | No          | 11      | 11-B | 100    | Bozic | Inf | unif   | wholeT_0.5  | S5:OT, S5:OT-A                                                   |
| 541 | No          | 11      | 11-B | 100    | exp   | 0   | last   | singleC     | S1:OT, S1:OT-A                                                   |
| 542 | No          | 11      | 11-B | 100    | exp   | 0   | last   | wholeT_0.01 | S1:OT, S1:OT-A, S5:OT, S5:OT-A                                   |
| 543 | No          | 11      | 11-B | 100    | exp   | 0   | last   | wholeT_0.5  | S1:OT, S1:OT-A                                                   |
| 544 | No          | 11      | 11-B | 100    | exp   | 0   | unif   | singleC     | S1:CBN-A, S1:OT, S1:OT-A, S5:DiP, S5:DiP-A, S5:OT, S5:OT-A       |
| 545 | No          | 11      | 11-B | 100    | exp   | 0   | unif   | wholeT_0.01 | J1:OT, J1:OT-A, S1:OT, S1:OT-A, S5:DiP, S5:DiP-A, S5:OT, S5:OT-A |
| 546 | No          | 11      | 11-B | 100    | exp   | 0   | unif   | wholeT_0.5  | S1:OT, S1:OT-A, S5:DiP, S5:DiP-A, S5:OT, S5:OT-A                 |
| 547 | No          | 11      | 11-B | 100    | exp   | Inf | last   | singleC     | S5:OT, S5:OT-A                                                   |
| 548 | No          | 11      | 11-B | 100    | exp   | Inf | last   | wholeT_0.01 | J5:CBN-A, J5:OT, J5:OT-A                                         |
| 549 | No          | 11      | 11-B | 100    | exp   | Inf | last   | wholeT_0.5  | S5:OT, S5:OT-A                                                   |
| 550 | No          | 11      | 11-B | 100    | exp   | Inf | unif   | singleC     | J1:OT, J1:OT-A, S5:DiP, S5:DiP-A, S5:OT, S5:OT-A                 |
| 551 | No          | 11      | 11-B | 100    | exp   | Inf | unif   | wholeT_0.01 | S5:CBN, S5:CBN-A, S5:OT, S5:OT-A                                 |
| 552 | No          | 11      | 11-B | 100    | exp   | Inf | unif   | wholeT_0.5  | J1:OT, J1:OT-A, S5:DiP, S5:DiP-A, S5:OT, S5:OT-A                 |
| 553 | No          | 11      | 11-B | 100    | McF_4 | 0   | last   | singleC     | S1:OT, S1:OT-A, S5:OT, S5:OT-A                                   |
| 554 | No          | 11      | 11-B | 100    | McF_4 | 0   | last   | wholeT_0.01 | S5:OT, S5:OT-A                                                   |
| 555 | No          | 11      | 11-B | 100    | McF_4 | 0   | last   | wholeT_0.5  | S1:OT, S1:OT-A, S5:OT, S5:OT-A                                   |
| 556 | No          | 11      | 11-B | 100    | McF_4 | 0   | unif   | singleC     | S5:CBN-A, S5:OT, S5:OT-A                                         |
| 557 | No          | 11      | 11-B | 100    | McF_4 | 0   | unif   | wholeT_0.01 | S5:CBN, S5:CBN-A, S5:OT, S5:OT-A                                 |
| 558 | No          | 11      | 11-B | 100    | McF_4 | 0   | unif   | wholeT_0.5  | S5:OT, S5:OT-A                                                   |



Table 5: (continued)

|     | Conjunction | Drivers | Tree | S.Size | Model | sh  | S.Time | S.Type      | Best method(s)                                                                                       |
|-----|-------------|---------|------|--------|-------|-----|--------|-------------|------------------------------------------------------------------------------------------------------|
| 559 | No          | 11      | 11-B | 100    | McF_4 | Inf | last   | singleC     | S1:OT, S1:OT-A, S5:OT, S5:OT-A                                                                       |
| 560 | No          | 11      | 11-B | 100    | McF_4 | Inf | last   | wholeT_0.01 | S5:OT, S5:OT-A                                                                                       |
| 561 | No          | 11      | 11-B | 100    | McF_4 | Inf | last   | wholeT_0.5  | S1:OT, S1:OT-A, S5:OT, S5:OT-A                                                                       |
| 562 | No          | 11      | 11-B | 100    | McF_4 | Inf | unif   | singleC     | S5:OT, S5:OT-A                                                                                       |
| 563 | No          | 11      | 11-B | 100    | McF_4 | Inf | unif   | wholeT_0.01 | S5:CBN-A, S5:OT, S5:OT-A                                                                             |
| 564 | No          | 11      | 11-B | 100    | McF_4 | Inf | unif   | wholeT_0.5  | S1:OT, S1:OT-A, S5:CBN-A, S5:OT, S5:OT-A                                                             |
| 565 | No          | 11      | 11-B | 100    | McF_6 | 0   | last   | singleC     | S5:OT                                                                                                |
| 566 | No          | 11      | 11-B | 100    | McF_6 | 0   | last   | wholeT_0.01 | S5:OT                                                                                                |
| 567 | No          | 11      | 11-B | 100    | McF_6 | 0   | last   | wholeT_0.5  | S5:OT                                                                                                |
| 568 | No          | 11      | 11-B | 100    | McF_6 | 0   | unif   | singleC     | S1:OT, S1:OT-A, S5:CBN, S5:CBN-A, S5:OT, S5:OT-A                                                     |
| 569 | No          | 11      | 11-B | 100    | McF_6 | 0   | unif   | wholeT_0.01 | S5:CBN-A, S5:OT, S5:OT-A                                                                             |
| 570 | No          | 11      | 11-B | 100    | McF_6 | 0   | unif   | wholeT_0.5  | J1:CBN, J1:CBN-A, S1:OT, S1:OT-A, S5:CBN, S5:CBN-A, S5:OT, S5:OT-A                                   |
| 571 | No          | 11      | 11-B | 100    | McF_6 | Inf | last   | singleC     | S5:OT                                                                                                |
| 572 | No          | 11      | 11-B | 100    | McF_6 | Inf | last   | wholeT_0.01 | S5:OT, S5:OT-A                                                                                       |
| 573 | No          | 11      | 11-B | 100    | McF_6 | Inf | last   | wholeT_0.5  | S5:OT                                                                                                |
| 574 | No          | 11      | 11-B | 100    | McF_6 | Inf | unif   | singleC     | S1:OT, S1:OT-A, S5:CBN, S5:CBN-A, S5:OT, S5:OT-A                                                     |
| 575 | No          | 11      | 11-B | 100    | McF_6 | Inf | unif   | wholeT_0.01 | S5:CBN, S5:CBN-A, S5:OT, S5:OT-A                                                                     |
| 576 | No          | 11      | 11-B | 100    | McF_6 | Inf | unif   | wholeT_0.5  | S5:CBN-A, S5:OT, S5:OT-A                                                                             |
| 577 | No          | 9       | 9-B  | 1000   | Bozic | 0   | last   | singleC     | S1:OT, S1:OT-A                                                                                       |
| 578 | No          | 9       | 9-B  | 1000   | Bozic | 0   | last   | wholeT_0.01 | S1:CBN-A, S1:DiP, S1:DiP-A, S1:OT, S1:OT-A, S5:CBN-A, S5:DiP, S5:DiP-A, S5:OT, S5:OT-A               |
| 579 | No          | 9       | 9-B  | 1000   | Bozic | 0   | last   | wholeT_0.5  | S1:OT, S1:OT-A                                                                                       |
| 580 | No          | 9       | 9-B  | 1000   | Bozic | 0   | unif   | singleC     | S1:DiP, S1:DiP-A, S1:OT, S1:OT-A, S5:DiP, S5:DiP-A, S5:OT, S5:OT-A                                   |
| 581 | No          | 9       | 9-B  | 1000   | Bozic | 0   | unif   | wholeT_0.01 | J1:DiP, J1:DiP-A, J1:OT, J1:OT-A, S1:DiP, S1:DiP-A, S1:OT, S1:OT-A, S5:DiP, S5:DiP-A, S5:OT, S5:OT-A |
| 582 | No          | 9       | 9-B  | 1000   | Bozic | 0   | unif   | wholeT_0.5  | S1:DiP, S1:DiP-A, S1:OT, S1:OT-A, S5:DiP, S5:DiP-A, S5:OT, S5:OT-A                                   |
| 583 | No          | 9       | 9-B  | 1000   | Bozic | Inf | last   | singleC     | S5:DiP, S5:DiP-A, S5:OT, S5:OT-A                                                                     |
| 584 | No          | 9       | 9-B  | 1000   | Bozic | Inf | last   | wholeT_0.01 | J5:DiP, J5:DiP-A                                                                                     |
| 585 | No          | 9       | 9-B  | 1000   | Bozic | Inf | last   | wholeT_0.5  | S5:DiP, S5:DiP-A, S5:OT, S5:OT-A                                                                     |
| 586 | No          | 9       | 9-B  | 1000   | Bozic | Inf | unif   | singleC     | S1:CBN, S1:CBN-A, S1:OT, S1:OT-A                                                                     |
| 587 | No          | 9       | 9-B  | 1000   | Bozic | Inf | unif   | wholeT_0.01 | J1:CBN-A, S5:CBN, S5:CBN-A, S5:DiP, S5:DiP-A, S5:OT, S5:OT-A                                         |

Table 5: (continued)

|     | Conjunction | Drivers | Tree | S.Size | Model | sh  | S.Time | S.Type      | Best method(s)                                                                           |
|-----|-------------|---------|------|--------|-------|-----|--------|-------------|------------------------------------------------------------------------------------------|
| 588 | No          | 9       | 9-B  | 1000   | Bozic | Inf | unif   | wholeT_0.5  | S1:CBN, S1:CBN-A, S1:OT, S1:OT-A                                                         |
| 589 | No          | 9       | 9-B  | 1000   | exp   | 0   | last   | singleC     | S1:OT, S1:OT-A                                                                           |
| 590 | No          | 9       | 9-B  | 1000   | exp   | 0   | last   | wholeT_0.01 | S1:DiP-A, S1:OT, S1:OT-A                                                                 |
| 591 | No          | 9       | 9-B  | 1000   | exp   | 0   | last   | wholeT_0.5  | S1:DiP, S1:DiP-A, S1:OT, S1:OT-A,<br>S5:DiP, S5:DiP-A, S5:OT, S5:OT-A                    |
| 592 | No          | 9       | 9-B  | 1000   | exp   | 0   | unif   | singleC     | S1:DiP, S1:DiP-A, S1:OT, S1:OT-A,<br>S5:DiP, S5:DiP-A, S5:OT, S5:OT-A                    |
| 593 | No          | 9       | 9-B  | 1000   | exp   | 0   | unif   | wholeT_0.01 | S1:DiP, S1:DiP-A, S1:OT, S1:OT-A,<br>S5:DiP, S5:DiP-A, S5:OT, S5:OT-A                    |
| 594 | No          | 9       | 9-B  | 1000   | exp   | 0   | unif   | wholeT_0.5  | S1:DiP, S1:DiP-A, S1:OT, S1:OT-A,<br>S5:DiP, S5:DiP-A, S5:OT, S5:OT-A                    |
| 595 | No          | 9       | 9-B  | 1000   | exp   | Inf | last   | singleC     | S5:DiP, S5:DiP-A, S5:OT, S5:OT-A                                                         |
| 596 | No          | 9       | 9-B  | 1000   | exp   | Inf | last   | wholeT_0.01 | J1:DiP, J1:DiP-A, J5:DiP, J5:DiP-A,<br>S5:DiP, S5:DiP-A                                  |
| 597 | No          | 9       | 9-B  | 1000   | exp   | Inf | last   | wholeT_0.5  | S5:DiP, S5:DiP-A, S5:OT, S5:OT-A                                                         |
| 598 | No          | 9       | 9-B  | 1000   | exp   | Inf | unif   | singleC     | S1:CBN, S1:CBN-A, S1:OT, S1:OT-A                                                         |
| 599 | No          | 9       | 9-B  | 1000   | exp   | Inf | unif   | wholeT_0.01 | J1:OT, J1:OT-A, J5:DiP, J5:DiP-A,<br>J5:OT, J5:OT-A, S5:DiP, S5:DiP-A,<br>S5:OT, S5:OT-A |
| 600 | No          | 9       | 9-B  | 1000   | exp   | Inf | unif   | wholeT_0.5  | S1:OT, S1:OT-A                                                                           |
| 601 | No          | 9       | 9-B  | 1000   | McF_4 | 0   | last   | singleC     | S1:DiP, S1:DiP-A, S1:OT, S1:OT-A                                                         |
| 602 | No          | 9       | 9-B  | 1000   | McF_4 | 0   | last   | wholeT_0.01 | S5:DiP, S5:DiP-A, S5:OT, S5:OT-A                                                         |
| 603 | No          | 9       | 9-B  | 1000   | McF_4 | 0   | last   | wholeT_0.5  | S1:DiP-A, S1:OT, S1:OT-A                                                                 |
| 604 | No          | 9       | 9-B  | 1000   | McF_4 | 0   | unif   | singleC     | S1:DiP, S1:DiP-A, S1:OT, S1:OT-A                                                         |
| 605 | No          | 9       | 9-B  | 1000   | McF_4 | 0   | unif   | wholeT_0.01 | S1:OT, S1:OT-A, S5:DiP, S5:DiP-A,<br>S5:OT, S5:OT-A                                      |
| 606 | No          | 9       | 9-B  | 1000   | McF_4 | 0   | unif   | wholeT_0.5  | S1:DiP, S1:DiP-A, S1:OT, S1:OT-A                                                         |
| 607 | No          | 9       | 9-B  | 1000   | McF_4 | Inf | last   | singleC     | S1:OT, S1:OT-A                                                                           |
| 608 | No          | 9       | 9-B  | 1000   | McF_4 | Inf | last   | wholeT_0.01 | S5:DiP, S5:DiP-A, S5:OT, S5:OT-A                                                         |
| 609 | No          | 9       | 9-B  | 1000   | McF_4 | Inf | last   | wholeT_0.5  | S1:OT, S1:OT-A                                                                           |
| 610 | No          | 9       | 9-B  | 1000   | McF_4 | Inf | unif   | singleC     | S1:DiP, S1:DiP-A, S1:OT, S1:OT-A                                                         |
| 611 | No          | 9       | 9-B  | 1000   | McF_4 | Inf | unif   | wholeT_0.01 | S5:DiP, S5:DiP-A, S5:OT, S5:OT-A                                                         |
| 612 | No          | 9       | 9-B  | 1000   | McF_4 | Inf | unif   | wholeT_0.5  | S1:DiP, S1:DiP-A, S1:OT, S1:OT-A                                                         |
| 613 | No          | 9       | 9-B  | 1000   | McF_6 | 0   | last   | singleC     | S5:OT                                                                                    |
| 614 | No          | 9       | 9-B  | 1000   | McF_6 | 0   | last   | wholeT_0.01 | J1:OT, S5:OT                                                                             |
| 615 | No          | 9       | 9-B  | 1000   | McF_6 | 0   | last   | wholeT_0.5  | S1:OT, S5:OT                                                                             |
| 616 | No          | 9       | 9-B  | 1000   | McF_6 | 0   | unif   | singleC     | S1:DiP, S1:DiP-A, S1:OT, S1:OT-A                                                         |
| 617 | No          | 9       | 9-B  | 1000   | McF_6 | 0   | unif   | wholeT_0.01 | S5:DiP, S5:DiP-A, S5:OT, S5:OT-A                                                         |
| 618 | No          | 9       | 9-B  | 1000   | McF_6 | 0   | unif   | wholeT_0.5  | S1:DiP, S1:DiP-A, S1:OT, S1:OT-A                                                         |
| 619 | No          | 9       | 9-B  | 1000   | McF_6 | Inf | last   | singleC     | S5:DiP, S5:DiP-A, S5:OT, S5:OT-A                                                         |

Table 5: (continued)

|     | Conjunction | Drivers | Tree | S.Size | Model | sh  | S.Time | S.Type      | Best method(s)                                                     |
|-----|-------------|---------|------|--------|-------|-----|--------|-------------|--------------------------------------------------------------------|
| 620 | No          | 9       | 9-B  | 1000   | McF_6 | Inf | last   | wholeT_0.01 | S5:DiP, S5:DiP-A, S5:OT-A                                          |
| 621 | No          | 9       | 9-B  | 1000   | McF_6 | Inf | last   | wholeT_0.5  | S1:DiP, S1:DiP-A, S1:OT-A, S5:DiP, S5:DiP-A, S5:OT-A               |
| 622 | No          | 9       | 9-B  | 1000   | McF_6 | Inf | unif   | singleC     | S1:DiP, S1:DiP-A, S1:OT, S1:OT-A                                   |
| 623 | No          | 9       | 9-B  | 1000   | McF_6 | Inf | unif   | wholeT_0.01 | S5:CBN, S5:DiP, S5:DiP-A, S5:OT, S5:OT-A                           |
| 624 | No          | 9       | 9-B  | 1000   | McF_6 | Inf | unif   | wholeT_0.5  | S1:DiP, S1:DiP-A, S1:OT, S1:OT-A                                   |
| 625 | No          | 9       | 9-B  | 200    | Bozic | 0   | last   | singleC     | S1:OT, S1:OT-A                                                     |
| 626 | No          | 9       | 9-B  | 200    | Bozic | 0   | last   | wholeT_0.01 | S5:OT, S5:OT-A                                                     |
| 627 | No          | 9       | 9-B  | 200    | Bozic | 0   | last   | wholeT_0.5  | S1:OT, S1:OT-A                                                     |
| 628 | No          | 9       | 9-B  | 200    | Bozic | 0   | unif   | singleC     | S1:OT, S1:OT-A, S5:DiP, S5:DiP-A, S5:OT, S5:OT-A                   |
| 629 | No          | 9       | 9-B  | 200    | Bozic | 0   | unif   | wholeT_0.01 | J1:DiP, J1:DiP-A, J1:OT, J1:OT-A, S5:DiP, S5:DiP-A, S5:OT, S5:OT-A |
| 630 | No          | 9       | 9-B  | 200    | Bozic | 0   | unif   | wholeT_0.5  | S1:DiP, S1:DiP-A, S1:OT, S1:OT-A, S5:DiP, S5:DiP-A, S5:OT, S5:OT-A |
| 631 | No          | 9       | 9-B  | 200    | Bozic | Inf | last   | singleC     | S5:OT, S5:OT-A                                                     |
| 632 | No          | 9       | 9-B  | 200    | Bozic | Inf | last   | wholeT_0.01 | J5:CBN-A, J5:OT, J5:OT-A                                           |
| 633 | No          | 9       | 9-B  | 200    | Bozic | Inf | last   | wholeT_0.5  | S5:OT, S5:OT-A                                                     |
| 634 | No          | 9       | 9-B  | 200    | Bozic | Inf | unif   | singleC     | J1:DiP, J1:DiP-A, J1:OT, J1:OT-A, S5:DiP, S5:DiP-A, S5:OT, S5:OT-A |
| 635 | No          | 9       | 9-B  | 200    | Bozic | Inf | unif   | wholeT_0.01 | J5:OT, J5:OT-A, S5:CBN-A, S5:OT, S5:OT-A                           |
| 636 | No          | 9       | 9-B  | 200    | Bozic | Inf | unif   | wholeT_0.5  | J1:DiP, J1:DiP-A, J1:OT, J1:OT-A, S5:DiP, S5:DiP-A, S5:OT, S5:OT-A |
| 637 | No          | 9       | 9-B  | 200    | exp   | 0   | last   | singleC     | S1:OT, S1:OT-A                                                     |
| 638 | No          | 9       | 9-B  | 200    | exp   | 0   | last   | wholeT_0.01 | S1:OT, S1:OT-A                                                     |
| 639 | No          | 9       | 9-B  | 200    | exp   | 0   | last   | wholeT_0.5  | S1:OT, S1:OT-A                                                     |
| 640 | No          | 9       | 9-B  | 200    | exp   | 0   | unif   | singleC     | S1:DiP, S1:DiP-A, S1:OT, S1:OT-A, S5:DiP, S5:DiP-A, S5:OT, S5:OT-A |
| 641 | No          | 9       | 9-B  | 200    | exp   | 0   | unif   | wholeT_0.01 | S1:OT, S1:OT-A                                                     |
| 642 | No          | 9       | 9-B  | 200    | exp   | 0   | unif   | wholeT_0.5  | S1:DiP, S1:DiP-A, S1:OT, S1:OT-A, S5:DiP, S5:DiP-A, S5:OT, S5:OT-A |
| 643 | No          | 9       | 9-B  | 200    | exp   | Inf | last   | singleC     | S5:OT, S5:OT-A                                                     |
| 644 | No          | 9       | 9-B  | 200    | exp   | Inf | last   | wholeT_0.01 | J5:CBN-A, J5:OT, J5:OT-A                                           |
| 645 | No          | 9       | 9-B  | 200    | exp   | Inf | last   | wholeT_0.5  | S5:OT, S5:OT-A                                                     |
| 646 | No          | 9       | 9-B  | 200    | exp   | Inf | unif   | singleC     | J1:OT, J1:OT-A, S1:OT, S1:OT-A, S5:DiP, S5:DiP-A, S5:OT, S5:OT-A   |
| 647 | No          | 9       | 9-B  | 200    | exp   | Inf | unif   | wholeT_0.01 | S5:OT, S5:OT-A                                                     |
| 648 | No          | 9       | 9-B  | 200    | exp   | Inf | unif   | wholeT_0.5  | S1:OT, S1:OT-A                                                     |

Table 5: (continued)

|     | Conjunction | Drivers | Tree | S.Size | Model | sh  | S.Time | S.Type      | Best method(s)                                                                     |
|-----|-------------|---------|------|--------|-------|-----|--------|-------------|------------------------------------------------------------------------------------|
| 649 | No          | 9       | 9-B  | 200    | McF_4 | 0   | last   | singleC     | S1:OT, S1:OT-A, S5:OT, S5:OT-A                                                     |
| 650 | No          | 9       | 9-B  | 200    | McF_4 | 0   | last   | wholeT_0.01 | S5:OT, S5:OT-A                                                                     |
| 651 | No          | 9       | 9-B  | 200    | McF_4 | 0   | last   | wholeT_0.5  | S1:OT, S1:OT-A, S5:OT, S5:OT-A                                                     |
| 652 | No          | 9       | 9-B  | 200    | McF_4 | 0   | unif   | singleC     | S5:OT, S5:OT-A                                                                     |
| 653 | No          | 9       | 9-B  | 200    | McF_4 | 0   | unif   | wholeT_0.01 | S5:OT, S5:OT-A                                                                     |
| 654 | No          | 9       | 9-B  | 200    | McF_4 | 0   | unif   | wholeT_0.5  | S1:OT, S1:OT-A, S5:OT, S5:OT-A                                                     |
| 655 | No          | 9       | 9-B  | 200    | McF_4 | Inf | last   | singleC     | S1:OT, S1:OT-A, S5:OT, S5:OT-A                                                     |
| 656 | No          | 9       | 9-B  | 200    | McF_4 | Inf | last   | wholeT_0.01 | S5:OT, S5:OT-A                                                                     |
| 657 | No          | 9       | 9-B  | 200    | McF_4 | Inf | last   | wholeT_0.5  | S1:OT, S1:OT-A, S5:OT, S5:OT-A                                                     |
| 658 | No          | 9       | 9-B  | 200    | McF_4 | Inf | unif   | singleC     | S1:OT, S1:OT-A, S5:OT, S5:OT-A                                                     |
| 659 | No          | 9       | 9-B  | 200    | McF_4 | Inf | unif   | wholeT_0.01 | S5:OT, S5:OT-A                                                                     |
| 660 | No          | 9       | 9-B  | 200    | McF_4 | Inf | unif   | wholeT_0.5  | S1:OT, S1:OT-A, S5:OT, S5:OT-A                                                     |
| 661 | No          | 9       | 9-B  | 200    | McF_6 | 0   | last   | singleC     | S5:OT, S5:OT-A                                                                     |
| 662 | No          | 9       | 9-B  | 200    | McF_6 | 0   | last   | wholeT_0.01 | J1:OT, J1:OT-A, S5:OT, S5:OT-A                                                     |
| 663 | No          | 9       | 9-B  | 200    | McF_6 | 0   | last   | wholeT_0.5  | S5:OT, S5:OT-A                                                                     |
| 664 | No          | 9       | 9-B  | 200    | McF_6 | 0   | unif   | singleC     | S1:OT, S1:OT-A, S5:CBN, S5:CBN-A, S5:OT, S5:OT-A                                   |
| 665 | No          | 9       | 9-B  | 200    | McF_6 | 0   | unif   | wholeT_0.01 | S5:OT, S5:OT-A                                                                     |
| 666 | No          | 9       | 9-B  | 200    | McF_6 | 0   | unif   | wholeT_0.5  | S5:CBN-A, S5:OT, S5:OT-A                                                           |
| 667 | No          | 9       | 9-B  | 200    | McF_6 | Inf | last   | singleC     | S5:OT-A                                                                            |
| 668 | No          | 9       | 9-B  | 200    | McF_6 | Inf | last   | wholeT_0.01 | S5:OT-A                                                                            |
| 669 | No          | 9       | 9-B  | 200    | McF_6 | Inf | last   | wholeT_0.5  | S5:OT-A                                                                            |
| 670 | No          | 9       | 9-B  | 200    | McF_6 | Inf | unif   | singleC     | S5:CBN, S5:OT, S5:OT-A                                                             |
| 671 | No          | 9       | 9-B  | 200    | McF_6 | Inf | unif   | wholeT_0.01 | S5:OT, S5:OT-A                                                                     |
| 672 | No          | 9       | 9-B  | 200    | McF_6 | Inf | unif   | wholeT_0.5  | S1:OT, S1:OT-A, S5:CBN, S5:CBN-A, S5:OT, S5:OT-A                                   |
| 673 | No          | 9       | 9-B  | 100    | Bozic | 0   | last   | singleC     | S1:OT, S1:OT-A, S5:OT, S5:OT-A                                                     |
| 674 | No          | 9       | 9-B  | 100    | Bozic | 0   | last   | wholeT_0.01 | S5:OT, S5:OT-A                                                                     |
| 675 | No          | 9       | 9-B  | 100    | Bozic | 0   | last   | wholeT_0.5  | J1:DiP, J1:DiP-A, J1:OT, J1:OT-A, S1:OT, S1:OT-A, S5:DiP, S5:DiP-A, S5:OT, S5:OT-A |
| 676 | No          | 9       | 9-B  | 100    | Bozic | 0   | unif   | singleC     | S5:DiP, S5:DiP-A, S5:OT, S5:OT-A                                                   |
| 677 | No          | 9       | 9-B  | 100    | Bozic | 0   | unif   | wholeT_0.01 | J1:OT, J1:OT-A, S5:DiP, S5:DiP-A, S5:OT, S5:OT-A                                   |
| 678 | No          | 9       | 9-B  | 100    | Bozic | 0   | unif   | wholeT_0.5  | S5:DiP, S5:DiP-A, S5:OT, S5:OT-A                                                   |
| 679 | No          | 9       | 9-B  | 100    | Bozic | Inf | last   | singleC     | J1:OT, J1:OT-A, J5:OT, J5:OT-A, S5:OT, S5:OT-A                                     |
| 680 | No          | 9       | 9-B  | 100    | Bozic | Inf | last   | wholeT_0.01 | J5:OT, J5:OT-A                                                                     |
| 681 | No          | 9       | 9-B  | 100    | Bozic | Inf | last   | wholeT_0.5  | J1:OT, J1:OT-A, J5:OT, J5:OT-A, S5:OT, S5:OT-A                                     |

Table 5: (continued)

|     | Conjunction | Drivers | Tree | S.Size | Model | sh  | S.Time | S.Type      | Best method(s)                                                     |
|-----|-------------|---------|------|--------|-------|-----|--------|-------------|--------------------------------------------------------------------|
| 682 | No          | 9       | 9-B  | 100    | Bozic | Inf | unif   | singleC     | S5:DiP, S5:DiP-A, S5:OT, S5:OT-A                                   |
| 683 | No          | 9       | 9-B  | 100    | Bozic | Inf | unif   | wholeT_0.01 | J5:OT, J5:OT-A                                                     |
| 684 | No          | 9       | 9-B  | 100    | Bozic | Inf | unif   | wholeT_0.5  | J1:OT, J1:OT-A, S5:DiP, S5:DiP-A, S5:OT, S5:OT-A                   |
| 685 | No          | 9       | 9-B  | 100    | exp   | 0   | last   | singleC     | S1:OT, S1:OT-A                                                     |
| 686 | No          | 9       | 9-B  | 100    | exp   | 0   | last   | wholeT_0.01 | S1:OT, S1:OT-A, S5:OT, S5:OT-A                                     |
| 687 | No          | 9       | 9-B  | 100    | exp   | 0   | last   | wholeT_0.5  | S1:OT, S1:OT-A                                                     |
| 688 | No          | 9       | 9-B  | 100    | exp   | 0   | unif   | singleC     | S1:DiP, S1:DiP-A, S1:OT, S1:OT-A, S5:DiP, S5:DiP-A, S5:OT, S5:OT-A |
| 689 | No          | 9       | 9-B  | 100    | exp   | 0   | unif   | wholeT_0.01 | J1:OT, J1:OT-A, S1:OT, S1:OT-A, S5:DiP, S5:DiP-A, S5:OT, S5:OT-A   |
| 690 | No          | 9       | 9-B  | 100    | exp   | 0   | unif   | wholeT_0.5  | S1:DiP, S1:DiP-A, S1:OT, S1:OT-A, S5:DiP, S5:DiP-A, S5:OT, S5:OT-A |
| 691 | No          | 9       | 9-B  | 100    | exp   | Inf | last   | singleC     | S5:OT, S5:OT-A                                                     |
| 692 | No          | 9       | 9-B  | 100    | exp   | Inf | last   | wholeT_0.01 | J5:CBN-A, J5:OT, J5:OT-A                                           |
| 693 | No          | 9       | 9-B  | 100    | exp   | Inf | last   | wholeT_0.5  | S5:OT, S5:OT-A                                                     |
| 694 | No          | 9       | 9-B  | 100    | exp   | Inf | unif   | singleC     | J1:OT, J1:OT-A, S5:DiP, S5:DiP-A, S5:OT, S5:OT-A                   |
| 695 | No          | 9       | 9-B  | 100    | exp   | Inf | unif   | wholeT_0.01 | S5:OT, S5:OT-A                                                     |
| 696 | No          | 9       | 9-B  | 100    | exp   | Inf | unif   | wholeT_0.5  | J1:OT, J1:OT-A, S5:DiP, S5:DiP-A, S5:OT, S5:OT-A                   |
| 697 | No          | 9       | 9-B  | 100    | McF_4 | 0   | last   | singleC     | S5:OT, S5:OT-A                                                     |
| 698 | No          | 9       | 9-B  | 100    | McF_4 | 0   | last   | wholeT_0.01 | S5:OT, S5:OT-A                                                     |
| 699 | No          | 9       | 9-B  | 100    | McF_4 | 0   | last   | wholeT_0.5  | S5:OT, S5:OT-A                                                     |
| 700 | No          | 9       | 9-B  | 100    | McF_4 | 0   | unif   | singleC     | S5:OT, S5:OT-A                                                     |
| 701 | No          | 9       | 9-B  | 100    | McF_4 | 0   | unif   | wholeT_0.01 | S5:OT, S5:OT-A                                                     |
| 702 | No          | 9       | 9-B  | 100    | McF_4 | 0   | unif   | wholeT_0.5  | S5:OT, S5:OT-A                                                     |
| 703 | No          | 9       | 9-B  | 100    | McF_4 | Inf | last   | singleC     | S5:OT, S5:OT-A                                                     |
| 704 | No          | 9       | 9-B  | 100    | McF_4 | Inf | last   | wholeT_0.01 | S5:OT, S5:OT-A                                                     |
| 705 | No          | 9       | 9-B  | 100    | McF_4 | Inf | last   | wholeT_0.5  | S5:OT, S5:OT-A                                                     |
| 706 | No          | 9       | 9-B  | 100    | McF_4 | Inf | unif   | singleC     | S5:OT, S5:OT-A                                                     |
| 707 | No          | 9       | 9-B  | 100    | McF_4 | Inf | unif   | wholeT_0.01 | S5:OT, S5:OT-A                                                     |
| 708 | No          | 9       | 9-B  | 100    | McF_4 | Inf | unif   | wholeT_0.5  | S5:OT, S5:OT-A                                                     |
| 709 | No          | 9       | 9-B  | 100    | McF_6 | 0   | last   | singleC     | S5:OT, S5:OT-A                                                     |
| 710 | No          | 9       | 9-B  | 100    | McF_6 | 0   | last   | wholeT_0.01 | S5:OT, S5:OT-A                                                     |
| 711 | No          | 9       | 9-B  | 100    | McF_6 | 0   | last   | wholeT_0.5  | S5:OT, S5:OT-A                                                     |
| 712 | No          | 9       | 9-B  | 100    | McF_6 | 0   | unif   | singleC     | S5:CBN-A, S5:OT, S5:OT-A                                           |
| 713 | No          | 9       | 9-B  | 100    | McF_6 | 0   | unif   | wholeT_0.01 | S5:CBN, S5:OT, S5:OT-A                                             |
| 714 | No          | 9       | 9-B  | 100    | McF_6 | 0   | unif   | wholeT_0.5  | S5:CBN, S5:CBN-A, S5:OT, S5:OT-A                                   |
| 715 | No          | 9       | 9-B  | 100    | McF_6 | Inf | last   | singleC     | S5:OT-A                                                            |

Table 5: (continued)

|     | Conjunction | Drivers | Tree | S.Size | Model | sh  | S.Time | S.Type      | Best method(s)                                                                                                                     |
|-----|-------------|---------|------|--------|-------|-----|--------|-------------|------------------------------------------------------------------------------------------------------------------------------------|
| 716 | No          | 9       | 9-B  | 100    | McF_6 | Inf | last   | wholeT_0.01 | S5:OT-A                                                                                                                            |
| 717 | No          | 9       | 9-B  | 100    | McF_6 | Inf | last   | wholeT_0.5  | S5:OT-A                                                                                                                            |
| 718 | No          | 9       | 9-B  | 100    | McF_6 | Inf | unif   | singleC     | S5:OT, S5:OT-A                                                                                                                     |
| 719 | No          | 9       | 9-B  | 100    | McF_6 | Inf | unif   | wholeT_0.01 | S5:CBN, S5:CBN-A, S5:OT, S5:OT-A                                                                                                   |
| 720 | No          | 9       | 9-B  | 100    | McF_6 | Inf | unif   | wholeT_0.5  | S5:CBN, S5:CBN-A, S5:OT, S5:OT-A                                                                                                   |
| 721 | No          | 7       | 7-B  | 1000   | Bozic | 0   | last   | singleC     | S1:OT-A, S5:OT-A                                                                                                                   |
| 722 | No          | 7       | 7-B  | 1000   | Bozic | 0   | last   | wholeT_0.01 | J1:DiP-A, J1:OT-A, J5:DiP-A, J5:OT-A,<br>S1:DiP-A, S1:OT-A, S5:DiP-A, S5:OT-A                                                      |
| 723 | No          | 7       | 7-B  | 1000   | Bozic | 0   | last   | wholeT_0.5  | S1:OT-A                                                                                                                            |
| 724 | No          | 7       | 7-B  | 1000   | Bozic | 0   | unif   | singleC     | S1:CBN-A, S1:OT, S1:OT-A                                                                                                           |
| 725 | No          | 7       | 7-B  | 1000   | Bozic | 0   | unif   | wholeT_0.01 | J5:CBN, J5:CBN-A, J5:DiP-A, J5:OT,<br>J5:OT-A                                                                                      |
| 726 | No          | 7       | 7-B  | 1000   | Bozic | 0   | unif   | wholeT_0.5  | J1:CBN, J1:CBN-A, J1:DiP, J1:DiP-<br>A, J1:OT, J1:OT-A, J5:DiP, J5:DiP-A,<br>S1:CBN, S1:CBN-A, S1:OT, S1:OT-A,<br>S5:DiP, S5:DiP-A |
| 727 | No          | 7       | 7-B  | 1000   | Bozic | Inf | last   | singleC     | J1:DiP-A, J1:OT-A, J5:DiP-A, J5:OT-A,<br>S5:DiP-A, S5:OT-A                                                                         |
| 728 | No          | 7       | 7-B  | 1000   | Bozic | Inf | last   | wholeT_0.01 | J5:CBN-A, J5:DiP-A, J5:OT-A                                                                                                        |
| 729 | No          | 7       | 7-B  | 1000   | Bozic | Inf | last   | wholeT_0.5  | J1:DiP-A, J1:OT-A, S5:DiP-A, S5:OT-A                                                                                               |
| 730 | No          | 7       | 7-B  | 1000   | Bozic | Inf | unif   | singleC     | S1:CBN, S1:CBN-A                                                                                                                   |
| 731 | No          | 7       | 7-B  | 1000   | Bozic | Inf | unif   | wholeT_0.01 | J1:OT, J1:OT-A, J5:CBN, J5:CBN-A,<br>J5:DiP-A, J5:OT, J5:OT-A, S5:CBN,<br>S5:CBN-A, S5:DiP-A, S5:OT, S5:OT-A                       |
| 732 | No          | 7       | 7-B  | 1000   | Bozic | Inf | unif   | wholeT_0.5  | S1:CBN, S1:CBN-A                                                                                                                   |
| 733 | No          | 7       | 7-B  | 1000   | exp   | 0   | last   | singleC     | S1:OT-A                                                                                                                            |
| 734 | No          | 7       | 7-B  | 1000   | exp   | 0   | last   | wholeT_0.01 | J1:OT-A, S1:OT-A, S5:OT-A                                                                                                          |
| 735 | No          | 7       | 7-B  | 1000   | exp   | 0   | last   | wholeT_0.5  | S1:OT-A                                                                                                                            |
| 736 | No          | 7       | 7-B  | 1000   | exp   | 0   | unif   | singleC     | J1:DiP, J1:DiP-A, J5:DiP, J5:DiP-A,<br>S1:DiP, S1:DiP-A, S5:DiP, S5:DiP-A                                                          |
| 737 | No          | 7       | 7-B  | 1000   | exp   | 0   | unif   | wholeT_0.01 | J1:CBN, J1:CBN-A, J1:OT, J1:OT-A,<br>S1:CBN-A                                                                                      |
| 738 | No          | 7       | 7-B  | 1000   | exp   | 0   | unif   | wholeT_0.5  | J1:DiP, J1:DiP-A, J5:DiP, J5:DiP-A,<br>S1:DiP, S1:DiP-A, S5:DiP, S5:DiP-A                                                          |
| 739 | No          | 7       | 7-B  | 1000   | exp   | Inf | last   | singleC     | J1:OT-A, S1:OT-A, S5:OT-A                                                                                                          |
| 740 | No          | 7       | 7-B  | 1000   | exp   | Inf | last   | wholeT_0.01 | S5:OT-A                                                                                                                            |
| 741 | No          | 7       | 7-B  | 1000   | exp   | Inf | last   | wholeT_0.5  | S1:OT-A, S5:OT-A                                                                                                                   |
| 742 | No          | 7       | 7-B  | 1000   | exp   | Inf | unif   | singleC     | S1:CBN, S1:CBN-A                                                                                                                   |

Table 5: (continued)

|     | Conjunction | Drivers | Tree | S.Size | Model | sh  | S.Time | S.Type      | Best method(s)                                                                                       |
|-----|-------------|---------|------|--------|-------|-----|--------|-------------|------------------------------------------------------------------------------------------------------|
| 743 | No          | 7       | 7-B  | 1000   | exp   | Inf | unif   | wholeT_0.01 | J1:CBN, J1:CBN-A, J1:OT, J1:OT-A, J5:CBN, J5:CBN-A, J5:OT, J5:OT-A, S5:CBN, S5:CBN-A, S5:OT, S5:OT-A |
| 744 | No          | 7       | 7-B  | 1000   | exp   | Inf | unif   | wholeT_0.5  | S1:CBN, S1:CBN-A, S1:OT, S1:OT-A                                                                     |
| 745 | No          | 7       | 7-B  | 1000   | McF_4 | 0   | last   | singleC     | S1:DiP-A, S1:OT-A, S5:DiP-A, S5:OT-A                                                                 |
| 746 | No          | 7       | 7-B  | 1000   | McF_4 | 0   | last   | wholeT_0.01 | S5:DiP-A, S5:OT-A                                                                                    |
| 747 | No          | 7       | 7-B  | 1000   | McF_4 | 0   | last   | wholeT_0.5  | S1:DiP-A, S1:OT-A, S5:DiP-A, S5:OT-A                                                                 |
| 748 | No          | 7       | 7-B  | 1000   | McF_4 | 0   | unif   | singleC     | S1:DiP, S1:DiP-A, S1:OT, S1:OT-A                                                                     |
| 749 | No          | 7       | 7-B  | 1000   | McF_4 | 0   | unif   | wholeT_0.01 | J1:DiP-A, J1:OT, J1:OT-A, S5:DiP-A, S5:OT, S5:OT-A                                                   |
| 750 | No          | 7       | 7-B  | 1000   | McF_4 | 0   | unif   | wholeT_0.5  | S1:DiP-A, S1:OT, S1:OT-A                                                                             |
| 751 | No          | 7       | 7-B  | 1000   | McF_4 | Inf | last   | singleC     | S1:DiP-A, S1:OT-A, S5:DiP-A, S5:OT-A                                                                 |
| 752 | No          | 7       | 7-B  | 1000   | McF_4 | Inf | last   | wholeT_0.01 | S5:DiP-A, S5:OT-A                                                                                    |
| 753 | No          | 7       | 7-B  | 1000   | McF_4 | Inf | last   | wholeT_0.5  | S1:DiP-A, S1:OT-A, S5:DiP-A, S5:OT-A                                                                 |
| 754 | No          | 7       | 7-B  | 1000   | McF_4 | Inf | unif   | singleC     | S1:OT, S1:OT-A                                                                                       |
| 755 | No          | 7       | 7-B  | 1000   | McF_4 | Inf | unif   | wholeT_0.01 | J1:OT, J1:OT-A, S5:OT, S5:OT-A                                                                       |
| 756 | No          | 7       | 7-B  | 1000   | McF_4 | Inf | unif   | wholeT_0.5  | S1:OT, S1:OT-A                                                                                       |
| 757 | No          | 7       | 7-B  | 1000   | McF_6 | 0   | last   | singleC     | J1:DiP-A, J1:OT-A, S5:DiP-A, S5:OT-A                                                                 |
| 758 | No          | 7       | 7-B  | 1000   | McF_6 | 0   | last   | wholeT_0.01 | J5:DiP-A, J5:OT-A, S5:DiP-A, S5:OT-A                                                                 |
| 759 | No          | 7       | 7-B  | 1000   | McF_6 | 0   | last   | wholeT_0.5  | J1:DiP-A, J1:OT-A, S1:DiP-A, S1:OT-A, S5:DiP-A, S5:OT-A                                              |
| 760 | No          | 7       | 7-B  | 1000   | McF_6 | 0   | unif   | singleC     | S1:DiP, S1:DiP-A, S1:OT, S1:OT-A, S5:DiP, S5:DiP-A, S5:OT, S5:OT-A                                   |
| 761 | No          | 7       | 7-B  | 1000   | McF_6 | 0   | unif   | wholeT_0.01 | S5:DiP, S5:DiP-A, S5:OT, S5:OT-A                                                                     |
| 762 | No          | 7       | 7-B  | 1000   | McF_6 | 0   | unif   | wholeT_0.5  | S1:DiP, S1:DiP-A, S1:OT, S1:OT-A, S5:DiP, S5:DiP-A, S5:OT, S5:OT-A                                   |
| 763 | No          | 7       | 7-B  | 1000   | McF_6 | Inf | last   | singleC     | J1:DiP-A, J1:OT-A, S5:DiP-A, S5:OT-A                                                                 |
| 764 | No          | 7       | 7-B  | 1000   | McF_6 | Inf | last   | wholeT_0.01 | J5:DiP-A, J5:OT-A, S5:DiP-A, S5:OT-A                                                                 |
| 765 | No          | 7       | 7-B  | 1000   | McF_6 | Inf | last   | wholeT_0.5  | J1:DiP-A, J1:OT-A, S5:DiP-A, S5:OT-A                                                                 |
| 766 | No          | 7       | 7-B  | 1000   | McF_6 | Inf | unif   | singleC     | S1:DiP-A, S1:OT, S1:OT-A, S5:DiP-A, S5:OT, S5:OT-A                                                   |
| 767 | No          | 7       | 7-B  | 1000   | McF_6 | Inf | unif   | wholeT_0.01 | S5:DiP-A, S5:OT, S5:OT-A                                                                             |
| 768 | No          | 7       | 7-B  | 1000   | McF_6 | Inf | unif   | wholeT_0.5  | S1:DiP-A, S1:OT, S1:OT-A, S5:DiP-A, S5:OT, S5:OT-A                                                   |
| 769 | No          | 7       | 7-B  | 200    | Bozic | 0   | last   | singleC     | S1:OT-A, S5:OT-A                                                                                     |
| 770 | No          | 7       | 7-B  | 200    | Bozic | 0   | last   | wholeT_0.01 | J1:OT-A, J5:OT-A, S5:OT-A                                                                            |
| 771 | No          | 7       | 7-B  | 200    | Bozic | 0   | last   | wholeT_0.5  | S1:OT-A                                                                                              |
| 772 | No          | 7       | 7-B  | 200    | Bozic | 0   | unif   | singleC     | J1:CBN, J1:CBN-A, J1:OT, J1:OT-A, S1:CBN, S1:OT, S1:OT-A                                             |
| 773 | No          | 7       | 7-B  | 200    | Bozic | 0   | unif   | wholeT_0.01 | J5:CBN, J5:CBN-A, J5:OT, J5:OT-A                                                                     |

Table 5: (continued)

|     | Conjunction | Drivers | Tree | S.Size | Model | sh  | S.Time | S.Type      | Best method(s)                                                                                                                             |
|-----|-------------|---------|------|--------|-------|-----|--------|-------------|--------------------------------------------------------------------------------------------------------------------------------------------|
| 774 | No          | 7       | 7-B  | 200    | Bozic | 0   | unif   | wholeT_0.5  | J1:CBN, J1:CBN-A, J1:OT, J1:OT-A, J5:DiP, J5:DiP-A, S1:CBN, S1:CBN-A, S1:OT, S1:OT-A, S5:DiP, S5:DiP-A                                     |
| 775 | No          | 7       | 7-B  | 200    | Bozic | Inf | last   | singleC     | S5:OT-A                                                                                                                                    |
| 776 | No          | 7       | 7-B  | 200    | Bozic | Inf | last   | wholeT_0.01 | J5:CBN-A, J5:OT-A                                                                                                                          |
| 777 | No          | 7       | 7-B  | 200    | Bozic | Inf | last   | wholeT_0.5  | S5:OT-A                                                                                                                                    |
| 778 | No          | 7       | 7-B  | 200    | Bozic | Inf | unif   | singleC     | J1:CBN, J1:CBN-A, S5:CBN, S5:CBN-A, S5:OT, S5:OT-A                                                                                         |
| 779 | No          | 7       | 7-B  | 200    | Bozic | Inf | unif   | wholeT_0.01 | J5:CBN, J5:CBN-A, J5:OT, J5:OT-A, S5:CBN, S5:CBN-A, S5:OT, S5:OT-A                                                                         |
| 780 | No          | 7       | 7-B  | 200    | Bozic | Inf | unif   | wholeT_0.5  | J1:CBN, J1:CBN-A                                                                                                                           |
| 781 | No          | 7       | 7-B  | 200    | exp   | 0   | last   | singleC     | S1:OT-A                                                                                                                                    |
| 782 | No          | 7       | 7-B  | 200    | exp   | 0   | last   | wholeT_0.01 | J1:OT-A, S1:OT-A, S5:OT-A                                                                                                                  |
| 783 | No          | 7       | 7-B  | 200    | exp   | 0   | last   | wholeT_0.5  | S1:OT-A                                                                                                                                    |
| 784 | No          | 7       | 7-B  | 200    | exp   | 0   | unif   | singleC     | J1:CBN, J1:CBN-A, J1:OT, J1:OT-A, J5:DiP, J5:DiP-A, S1:CBN, S1:CBN-A, S1:OT, S1:OT-A, S5:DiP, S5:DiP-A                                     |
| 785 | No          | 7       | 7-B  | 200    | exp   | 0   | unif   | wholeT_0.01 | J1:CBN, J1:CBN-A, J1:OT, J1:OT-A, S1:CBN-A, S1:OT, S1:OT-A                                                                                 |
| 786 | No          | 7       | 7-B  | 200    | exp   | 0   | unif   | wholeT_0.5  | J1:CBN, J1:CBN-A, J1:DiP, J1:DiP-A, J1:OT, J1:OT-A, J5:DiP, J5:DiP-A, S1:CBN, S1:CBN-A, S1:DiP, S1:DiP-A, S1:OT, S1:OT-A, S5:DiP, S5:DiP-A |
| 787 | No          | 7       | 7-B  | 200    | exp   | Inf | last   | singleC     | J1:OT-A, S5:OT-A                                                                                                                           |
| 788 | No          | 7       | 7-B  | 200    | exp   | Inf | last   | wholeT_0.01 | J5:OT-A, S5:OT-A                                                                                                                           |
| 789 | No          | 7       | 7-B  | 200    | exp   | Inf | last   | wholeT_0.5  | S5:OT-A                                                                                                                                    |
| 790 | No          | 7       | 7-B  | 200    | exp   | Inf | unif   | singleC     | J1:CBN, J1:CBN-A, J1:OT, J1:OT-A, S1:CBN, S1:CBN-A, S1:OT, S1:OT-A                                                                         |
| 791 | No          | 7       | 7-B  | 200    | exp   | Inf | unif   | wholeT_0.01 | J5:CBN, J5:CBN-A, J5:OT, J5:OT-A, S5:OT, S5:OT-A                                                                                           |
| 792 | No          | 7       | 7-B  | 200    | exp   | Inf | unif   | wholeT_0.5  | S1:CBN, S1:CBN-A, S1:OT, S1:OT-A                                                                                                           |
| 793 | No          | 7       | 7-B  | 200    | McF_4 | 0   | last   | singleC     | S5:OT-A                                                                                                                                    |
| 794 | No          | 7       | 7-B  | 200    | McF_4 | 0   | last   | wholeT_0.01 | S5:OT-A                                                                                                                                    |
| 795 | No          | 7       | 7-B  | 200    | McF_4 | 0   | last   | wholeT_0.5  | S5:OT-A                                                                                                                                    |
| 796 | No          | 7       | 7-B  | 200    | McF_4 | 0   | unif   | singleC     | J1:OT, J1:OT-A, S1:OT-A, S5:OT, S5:OT-A                                                                                                    |
| 797 | No          | 7       | 7-B  | 200    | McF_4 | 0   | unif   | wholeT_0.01 | J1:OT, J1:OT-A, S5:OT, S5:OT-A                                                                                                             |
| 798 | No          | 7       | 7-B  | 200    | McF_4 | 0   | unif   | wholeT_0.5  | J1:OT, J1:OT-A, S1:OT, S1:OT-A, S5:OT, S5:OT-A                                                                                             |
| 799 | No          | 7       | 7-B  | 200    | McF_4 | Inf | last   | singleC     | S5:OT-A                                                                                                                                    |



Table 5: (continued)

|     | Conjunction | Drivers | Tree | S.Size | Model | sh  | S.Time | S.Type      | Best method(s)                                                                             |
|-----|-------------|---------|------|--------|-------|-----|--------|-------------|--------------------------------------------------------------------------------------------|
| 800 | No          | 7       | 7-B  | 200    | McF_4 | Inf | last   | wholeT_0.01 | S5:OT-A                                                                                    |
| 801 | No          | 7       | 7-B  | 200    | McF_4 | Inf | last   | wholeT_0.5  | S5:OT-A                                                                                    |
| 802 | No          | 7       | 7-B  | 200    | McF_4 | Inf | unif   | singleC     | J1:OT, J1:OT-A, S5:OT, S5:OT-A                                                             |
| 803 | No          | 7       | 7-B  | 200    | McF_4 | Inf | unif   | wholeT_0.01 | J1:OT, J1:OT-A, S5:OT, S5:OT-A                                                             |
| 804 | No          | 7       | 7-B  | 200    | McF_4 | Inf | unif   | wholeT_0.5  | J1:OT, J1:OT-A, S1:OT, S1:OT-A,<br>S5:OT, S5:OT-A                                          |
| 805 | No          | 7       | 7-B  | 200    | McF_6 | 0   | last   | singleC     | J1:OT-A, J5:OT-A, S5:OT-A                                                                  |
| 806 | No          | 7       | 7-B  | 200    | McF_6 | 0   | last   | wholeT_0.01 | J5:OT-A, S5:OT-A                                                                           |
| 807 | No          | 7       | 7-B  | 200    | McF_6 | 0   | last   | wholeT_0.5  | J1:OT-A, S5:OT-A                                                                           |
| 808 | No          | 7       | 7-B  | 200    | McF_6 | 0   | unif   | singleC     | S5:OT, S5:OT-A                                                                             |
| 809 | No          | 7       | 7-B  | 200    | McF_6 | 0   | unif   | wholeT_0.01 | S5:OT, S5:OT-A                                                                             |
| 810 | No          | 7       | 7-B  | 200    | McF_6 | 0   | unif   | wholeT_0.5  | S5:CBN-A, S5:OT, S5:OT-A                                                                   |
| 811 | No          | 7       | 7-B  | 200    | McF_6 | Inf | last   | singleC     | J1:OT-A, J5:OT-A, S5:OT-A                                                                  |
| 812 | No          | 7       | 7-B  | 200    | McF_6 | Inf | last   | wholeT_0.01 | J5:OT-A, S5:OT-A                                                                           |
| 813 | No          | 7       | 7-B  | 200    | McF_6 | Inf | last   | wholeT_0.5  | J1:OT-A, S5:OT-A                                                                           |
| 814 | No          | 7       | 7-B  | 200    | McF_6 | Inf | unif   | singleC     | S5:CBN-A, S5:OT, S5:OT-A                                                                   |
| 815 | No          | 7       | 7-B  | 200    | McF_6 | Inf | unif   | wholeT_0.01 | S5:CBN-A, S5:OT, S5:OT-A                                                                   |
| 816 | No          | 7       | 7-B  | 200    | McF_6 | Inf | unif   | wholeT_0.5  | J1:CBN-A, J1:OT-A, J5:CBN-A,<br>S5:CBN-A, S5:OT, S5:OT-A                                   |
| 817 | No          | 7       | 7-B  | 100    | Bozic | 0   | last   | singleC     | S5:OT-A                                                                                    |
| 818 | No          | 7       | 7-B  | 100    | Bozic | 0   | last   | wholeT_0.01 | J1:OT-A, J5:OT-A, S5:OT-A                                                                  |
| 819 | No          | 7       | 7-B  | 100    | Bozic | 0   | last   | wholeT_0.5  | S1:OT-A, S5:OT-A                                                                           |
| 820 | No          | 7       | 7-B  | 100    | Bozic | 0   | unif   | singleC     | J1:CBN, J1:CBN-A, J1:OT, J1:OT-A,<br>S1:OT, S1:OT-A                                        |
| 821 | No          | 7       | 7-B  | 100    | Bozic | 0   | unif   | wholeT_0.01 | J5:CBN, J5:CBN-A, J5:OT, J5:OT-A                                                           |
| 822 | No          | 7       | 7-B  | 100    | Bozic | 0   | unif   | wholeT_0.5  | J1:CBN, J1:CBN-A, J1:OT, J1:OT-A,<br>J5:DiP, J5:DiP-A, S1:OT, S1:OT-A,<br>S5:DiP, S5:DiP-A |
| 823 | No          | 7       | 7-B  | 100    | Bozic | Inf | last   | singleC     | J1:OT-A, S5:OT-A                                                                           |
| 824 | No          | 7       | 7-B  | 100    | Bozic | Inf | last   | wholeT_0.01 | J5:CBN-A, J5:OT-A                                                                          |
| 825 | No          | 7       | 7-B  | 100    | Bozic | Inf | last   | wholeT_0.5  | S5:OT-A                                                                                    |
| 826 | No          | 7       | 7-B  | 100    | Bozic | Inf | unif   | singleC     | J1:CBN-A, S5:CBN, S5:CBN-A                                                                 |
| 827 | No          | 7       | 7-B  | 100    | Bozic | Inf | unif   | wholeT_0.01 | J5:CBN, J5:CBN-A, J5:OT, J5:OT-A                                                           |
| 828 | No          | 7       | 7-B  | 100    | Bozic | Inf | unif   | wholeT_0.5  | J1:CBN, J1:CBN-A, S5:CBN, S5:CBN-A,<br>S5:OT, S5:OT-A                                      |
| 829 | No          | 7       | 7-B  | 100    | exp   | 0   | last   | singleC     | S1:OT-A                                                                                    |
| 830 | No          | 7       | 7-B  | 100    | exp   | 0   | last   | wholeT_0.01 | J1:CBN, J1:CBN-A, J1:OT-A, J5:CBN-<br>A, J5:OT-A, S1:OT-A, S5:OT-A                         |
| 831 | No          | 7       | 7-B  | 100    | exp   | 0   | last   | wholeT_0.5  | S1:OT-A                                                                                    |

Table 5: (continued)

|     | Conjunction | Drivers | Tree | S.Size | Model | sh  | S.Time | S.Type      | Best method(s)                                                                                                       |
|-----|-------------|---------|------|--------|-------|-----|--------|-------------|----------------------------------------------------------------------------------------------------------------------|
| 832 | No          | 7       | 7-B  | 100    | exp   | 0   | unif   | singleC     | J1:CBN, J1:CBN-A, J1:OT, J1:OT-A, J5:DiP, J5:DiP-A, S1:CBN, S1:CBN-A, S1:OT, S1:OT-A, S5:DiP, S5:DiP-A               |
| 833 | No          | 7       | 7-B  | 100    | exp   | 0   | unif   | wholeT_0.01 | J1:CBN, J1:CBN-A, J1:OT, J1:OT-A, J5:DiP, J5:DiP-A, S1:OT, S1:OT-A, S5:CBN, S5:CBN-A, S5:DiP, S5:DiP-A               |
| 834 | No          | 7       | 7-B  | 100    | exp   | 0   | unif   | wholeT_0.5  | J1:CBN, J1:CBN-A, J1:OT, J1:OT-A, J5:DiP, J5:DiP-A, S1:CBN, S1:CBN-A, S1:OT, S1:OT-A, S5:DiP, S5:DiP-A               |
| 835 | No          | 7       | 7-B  | 100    | exp   | Inf | last   | singleC     | S5:OT-A                                                                                                              |
| 836 | No          | 7       | 7-B  | 100    | exp   | Inf | last   | wholeT_0.01 | J5:OT-A                                                                                                              |
| 837 | No          | 7       | 7-B  | 100    | exp   | Inf | last   | wholeT_0.5  | S5:OT-A                                                                                                              |
| 838 | No          | 7       | 7-B  | 100    | exp   | Inf | unif   | singleC     | J1:CBN, J1:CBN-A, J1:OT, J1:OT-A, J5:CBN, J5:CBN-A, J5:OT, J5:OT-A, S1:OT, S1:OT-A, S5:CBN, S5:CBN-A, S5:OT, S5:OT-A |
| 839 | No          | 7       | 7-B  | 100    | exp   | Inf | unif   | wholeT_0.01 | J5:CBN, J5:CBN-A, J5:OT, J5:OT-A, S5:OT, S5:OT-A                                                                     |
| 840 | No          | 7       | 7-B  | 100    | exp   | Inf | unif   | wholeT_0.5  | J1:CBN, J1:CBN-A, S1:OT, S1:OT-A                                                                                     |
| 841 | No          | 7       | 7-B  | 100    | McF_4 | 0   | last   | singleC     | S5:OT-A                                                                                                              |
| 842 | No          | 7       | 7-B  | 100    | McF_4 | 0   | last   | wholeT_0.01 | S5:OT-A                                                                                                              |
| 843 | No          | 7       | 7-B  | 100    | McF_4 | 0   | last   | wholeT_0.5  | S5:OT-A                                                                                                              |
| 844 | No          | 7       | 7-B  | 100    | McF_4 | 0   | unif   | singleC     | J1:OT, J1:OT-A, S5:OT, S5:OT-A                                                                                       |
| 845 | No          | 7       | 7-B  | 100    | McF_4 | 0   | unif   | wholeT_0.01 | J1:OT-A, S5:OT, S5:OT-A                                                                                              |
| 846 | No          | 7       | 7-B  | 100    | McF_4 | 0   | unif   | wholeT_0.5  | J1:OT, J1:OT-A, S5:OT, S5:OT-A                                                                                       |
| 847 | No          | 7       | 7-B  | 100    | McF_4 | Inf | last   | singleC     | S5:OT-A                                                                                                              |
| 848 | No          | 7       | 7-B  | 100    | McF_4 | Inf | last   | wholeT_0.01 | S5:OT-A                                                                                                              |
| 849 | No          | 7       | 7-B  | 100    | McF_4 | Inf | last   | wholeT_0.5  | S5:OT-A                                                                                                              |
| 850 | No          | 7       | 7-B  | 100    | McF_4 | Inf | unif   | singleC     | J1:OT, J1:OT-A, S5:OT, S5:OT-A                                                                                       |
| 851 | No          | 7       | 7-B  | 100    | McF_4 | Inf | unif   | wholeT_0.01 | J1:OT-A, S5:OT, S5:OT-A                                                                                              |
| 852 | No          | 7       | 7-B  | 100    | McF_4 | Inf | unif   | wholeT_0.5  | J1:OT, J1:OT-A, J5:CBN-A, S5:OT, S5:OT-A                                                                             |
| 853 | No          | 7       | 7-B  | 100    | McF_6 | 0   | last   | singleC     | J5:OT-A, S5:OT-A                                                                                                     |
| 854 | No          | 7       | 7-B  | 100    | McF_6 | 0   | last   | wholeT_0.01 | J5:OT-A, S5:OT-A                                                                                                     |
| 855 | No          | 7       | 7-B  | 100    | McF_6 | 0   | last   | wholeT_0.5  | S5:OT-A                                                                                                              |
| 856 | No          | 7       | 7-B  | 100    | McF_6 | 0   | unif   | singleC     | J1:CBN-A, J1:OT, J1:OT-A, J5:CBN-A, S5:CBN-A, S5:OT, S5:OT-A                                                         |
| 857 | No          | 7       | 7-B  | 100    | McF_6 | 0   | unif   | wholeT_0.01 | S5:CBN-A, S5:OT, S5:OT-A                                                                                             |
| 858 | No          | 7       | 7-B  | 100    | McF_6 | 0   | unif   | wholeT_0.5  | J1:CBN-A, S5:CBN-A, S5:OT, S5:OT-A                                                                                   |
| 859 | No          | 7       | 7-B  | 100    | McF_6 | Inf | last   | singleC     | S5:OT-A                                                                                                              |

Table 5: (continued)

|     | Conjunction | Drivers | Tree | S.Size | Model | sh  | S.Time | S.Type      | Best method(s)                                  |
|-----|-------------|---------|------|--------|-------|-----|--------|-------------|-------------------------------------------------|
| 860 | No          | 7       | 7-B  | 100    | McF_6 | Inf | last   | wholeT_0.01 | J5:OT-A, S5:OT-A                                |
| 861 | No          | 7       | 7-B  | 100    | McF_6 | Inf | last   | wholeT_0.5  | J1:OT-A, S5:OT-A                                |
| 862 | No          | 7       | 7-B  | 100    | McF_6 | Inf | unif   | singleC     | J1:CBN-A, J5:CBN-A, S5:CBN-A,<br>S5:OT, S5:OT-A |
| 863 | No          | 7       | 7-B  | 100    | McF_6 | Inf | unif   | wholeT_0.01 | J1:CBN-A, J5:CBN-A, S5:CBN-A,<br>S5:OT-A        |
| 864 | No          | 7       | 7-B  | 100    | McF_6 | Inf | unif   | wholeT_0.5  | J1:CBN-A, J5:CBN-A, S5:CBN-A,<br>S5:OT, S5:OT-A |

### 3.2 Confidence sets (MCB-2), PFD, Drivers Unknown

Table 6: Confidence sets (method MCB-2) when Drivers are Unknown for measure PFD.

|    | Conjunction | Drivers | Tree | S.Size | Model | sh  | S.Time | S.Type      | Best method(s)                                                                                                 |
|----|-------------|---------|------|--------|-------|-----|--------|-------------|----------------------------------------------------------------------------------------------------------------|
| 1  | Yes         | 11      | 11-A | 1000   | Bozic | 0   | last   | singleC     | S1:OT, S1:OT-A                                                                                                 |
| 2  | Yes         | 11      | 11-A | 1000   | Bozic | 0   | last   | wholeT_0.01 | J1:DiP, J1:DiP-A, J5:DiP, J5:DiP-A, S1:DiP, S1:DiP-A, S5:DiP, S5:DiP-A                                         |
| 3  | Yes         | 11      | 11-A | 1000   | Bozic | 0   | last   | wholeT_0.5  | S1:OT, S1:OT-A                                                                                                 |
| 4  | Yes         | 11      | 11-A | 1000   | Bozic | 0   | unif   | singleC     | S1:CBN, S1:CBN-A                                                                                               |
| 5  | Yes         | 11      | 11-A | 1000   | Bozic | 0   | unif   | wholeT_0.01 | J1:CBN-A, J1:DiP-A, S5:CBN, S5:CBN-A, S5:DiP, S5:DiP-A, S5:OT, S5:OT-A                                         |
| 6  | Yes         | 11      | 11-A | 1000   | Bozic | 0   | unif   | wholeT_0.5  | S1:CBN, S1:CBN-A, S5:CBN, S5:CBN-A                                                                             |
| 7  | Yes         | 11      | 11-A | 1000   | Bozic | Inf | last   | singleC     | J1:DiP, J1:DiP-A, J1:OT, J1:OT-A, J5:DiP, J5:DiP-A, J5:OT, J5:OT-A, S1:DiP-A, S5:DiP, S5:DiP-A, S5:OT, S5:OT-A |
| 8  | Yes         | 11      | 11-A | 1000   | Bozic | Inf | last   | wholeT_0.01 | J5:DiP, J5:DiP-A, J5:OT, J5:OT-A                                                                               |
| 9  | Yes         | 11      | 11-A | 1000   | Bozic | Inf | last   | wholeT_0.5  | J1:DiP, J1:DiP-A, J1:OT, J1:OT-A, J5:DiP, J5:DiP-A, J5:OT, J5:OT-A, S5:DiP, S5:DiP-A, S5:OT, S5:OT-A           |
| 10 | Yes         | 11      | 11-A | 1000   | Bozic | Inf | unif   | singleC     | J1:CBN, J1:CBN-A, S1:CBN, S1:CBN-A, S1:DiP, S1:DiP-A, S1:OT, S1:OT-A                                           |
| 11 | Yes         | 11      | 11-A | 1000   | Bozic | Inf | unif   | wholeT_0.01 | J1:CBN, J1:CBN-A, S5:CBN-A, S5:OT, S5:OT-A                                                                     |
| 12 | Yes         | 11      | 11-A | 1000   | Bozic | Inf | unif   | wholeT_0.5  | S1:CBN, S1:CBN-A, S1:DiP-A, S1:OT, S1:OT-A                                                                     |
| 13 | Yes         | 11      | 11-A | 1000   | exp   | 0   | last   | singleC     | S1:OT, S1:OT-A                                                                                                 |
| 14 | Yes         | 11      | 11-A | 1000   | exp   | 0   | last   | wholeT_0.01 | J1:DiP, J1:DiP-A, J1:OT, J1:OT-A, S1:DiP-A, S1:OT, S1:OT-A, S5:DiP-A, S5:OT, S5:OT-A                           |
| 15 | Yes         | 11      | 11-A | 1000   | exp   | 0   | last   | wholeT_0.5  | S1:OT, S1:OT-A                                                                                                 |
| 16 | Yes         | 11      | 11-A | 1000   | exp   | 0   | unif   | singleC     | S1:CBN, S1:CBN-A, S5:CBN, S5:CBN-A                                                                             |
| 17 | Yes         | 11      | 11-A | 1000   | exp   | 0   | unif   | wholeT_0.01 | S1:DiP, S1:DiP-A, S1:OT, S1:OT-A                                                                               |
| 18 | Yes         | 11      | 11-A | 1000   | exp   | 0   | unif   | wholeT_0.5  | S1:CBN, S1:CBN-A, S5:CBN, S5:CBN-A                                                                             |
| 19 | Yes         | 11      | 11-A | 1000   | exp   | Inf | last   | singleC     | J1:DiP, J1:DiP-A, J1:OT, J1:OT-A, S5:DiP, S5:DiP-A, S5:OT, S5:OT-A                                             |
| 20 | Yes         | 11      | 11-A | 1000   | exp   | Inf | last   | wholeT_0.01 | J5:DiP, J5:DiP-A, J5:OT, J5:OT-A, S5:DiP, S5:DiP-A, S5:OT, S5:OT-A                                             |
| 21 | Yes         | 11      | 11-A | 1000   | exp   | Inf | last   | wholeT_0.5  | J1:DiP, J1:DiP-A, J1:OT, J1:OT-A, S1:DiP-A, S5:DiP, S5:DiP-A, S5:OT, S5:OT-A                                   |

Table 6: (continued)

|    | Conjunction | Drivers | Tree | S.Size | Model | sh  | S.Time | S.Type      | Best method(s)                                                                                                                                 |
|----|-------------|---------|------|--------|-------|-----|--------|-------------|------------------------------------------------------------------------------------------------------------------------------------------------|
| 22 | Yes         | 11      | 11-A | 1000   | exp   | Inf | unif   | singleC     | S1:CBN, S1:CBN-A, S1:OT, S1:OT-A                                                                                                               |
| 23 | Yes         | 11      | 11-A | 1000   | exp   | Inf | unif   | wholeT_0.01 | J1:CBN-A, J1:DiP, J1:DiP-A, J1:OT, J1:OT-A                                                                                                     |
| 24 | Yes         | 11      | 11-A | 1000   | exp   | Inf | unif   | wholeT_0.5  | S1:CBN, S1:CBN-A, S1:OT, S1:OT-A                                                                                                               |
| 25 | Yes         | 11      | 11-A | 1000   | McF_4 | 0   | last   | singleC     | J1:CBN, J1:DiP, J1:DiP-A, J1:OT, J1:OT-A, J5:CBN, J5:DiP, J5:DiP-A, J5:OT, J5:OT-A, S1:DiP-A, S1:OT, S1:OT-A, S5:DiP, S5:DiP-A, S5:OT, S5:OT-A |
| 26 | Yes         | 11      | 11-A | 1000   | McF_4 | 0   | last   | wholeT_0.01 | J1:DiP, J1:DiP-A, J1:OT, J1:OT-A, J5:CBN, J5:DiP, J5:DiP-A, J5:OT, J5:OT-A, S1:DiP-A, S5:DiP, S5:DiP-A, S5:OT, S5:OT-A                         |
| 27 | Yes         | 11      | 11-A | 1000   | McF_4 | 0   | last   | wholeT_0.5  | J1:DiP, J1:DiP-A, J1:OT, J1:OT-A, J5:CBN, J5:DiP, J5:DiP-A, J5:OT, J5:OT-A, S1:DiP-A, S1:OT, S1:OT-A, S5:DiP, S5:DiP-A, S5:OT, S5:OT-A         |
| 28 | Yes         | 11      | 11-A | 1000   | McF_4 | 0   | unif   | singleC     | J1:CBN, J1:CBN-A, J1:DiP, J1:DiP-A, J1:OT, J1:OT-A, S1:DiP, S1:DiP-A, S1:OT, S1:OT-A, S5:DiP, S5:DiP-A, S5:OT, S5:OT-A                         |
| 29 | Yes         | 11      | 11-A | 1000   | McF_4 | 0   | unif   | wholeT_0.01 | J1:CBN-A, J1:DiP, J1:DiP-A, J1:OT, J1:OT-A, S1:DiP-A, S5:CBN-A, S5:DiP, S5:DiP-A, S5:OT, S5:OT-A                                               |
| 30 | Yes         | 11      | 11-A | 1000   | McF_4 | 0   | unif   | wholeT_0.5  | J1:CBN, J1:CBN-A, J1:DiP, J1:DiP-A, J1:OT, J1:OT-A, S1:DiP, S1:DiP-A, S1:OT, S1:OT-A, S5:CBN-A, S5:DiP, S5:DiP-A, S5:OT, S5:OT-A               |
| 31 | Yes         | 11      | 11-A | 1000   | McF_4 | Inf | last   | singleC     | J1:DiP, J1:DiP-A, J1:OT, J1:OT-A, J5:DiP, J5:DiP-A, J5:OT, J5:OT-A, S1:OT, S1:OT-A, S5:DiP, S5:DiP-A, S5:OT, S5:OT-A                           |
| 32 | Yes         | 11      | 11-A | 1000   | McF_4 | Inf | last   | wholeT_0.01 | J1:DiP, J1:DiP-A, J1:OT, J1:OT-A, J5:DiP, J5:DiP-A, J5:OT, J5:OT-A, S5:DiP, S5:DiP-A, S5:OT, S5:OT-A                                           |
| 33 | Yes         | 11      | 11-A | 1000   | McF_4 | Inf | last   | wholeT_0.5  | J1:DiP, J1:DiP-A, J1:OT, J1:OT-A, J5:DiP, J5:DiP-A, J5:OT, J5:OT-A, S1:DiP-A, S1:OT, S1:OT-A, S5:DiP, S5:DiP-A, S5:OT, S5:OT-A                 |

Table 6: (continued)

|    | Conjunction | Drivers | Tree | S.Size | Model | sh  | S.Time | S.Type      | Best method(s)                                                                                                                                                                               |
|----|-------------|---------|------|--------|-------|-----|--------|-------------|----------------------------------------------------------------------------------------------------------------------------------------------------------------------------------------------|
| 34 | Yes         | 11      | 11-A | 1000   | McF_4 | Inf | unif   | singleC     | J1:CBN-A, J1:DiP, J1:DiP-A, J1:OT, J1:OT-A, S1:DiP, S1:DiP-A, S1:OT, S1:OT-A, S5:CBN-A, S5:DiP, S5:DiP-A, S5:OT, S5:OT-A                                                                     |
| 35 | Yes         | 11      | 11-A | 1000   | McF_4 | Inf | unif   | wholeT_0.01 | J1:CBN-A, J1:DiP, J1:DiP-A, J1:OT, J1:OT-A, J5:DiP, J5:DiP-A, J5:OT, J5:OT-A, S5:CBN-A, S5:DiP, S5:DiP-A, S5:OT, S5:OT-A                                                                     |
| 36 | Yes         | 11      | 11-A | 1000   | McF_4 | Inf | unif   | wholeT_0.5  | J1:CBN-A, J1:DiP, J1:DiP-A, J1:OT, J1:OT-A, S1:DiP, S1:DiP-A, S1:OT, S1:OT-A, S5:CBN-A, S5:DiP, S5:DiP-A, S5:OT, S5:OT-A                                                                     |
| 37 | Yes         | 11      | 11-A | 1000   | McF_6 | 0   | last   | singleC     | J1:DiP, J1:OT, J5:DiP, J5:OT, S1:DiP, S1:OT, S5:DiP, S5:OT                                                                                                                                   |
| 38 | Yes         | 11      | 11-A | 1000   | McF_6 | 0   | last   | wholeT_0.01 | J1:DiP, J1:OT, J5:DiP, J5:OT, S1:DiP, S5:DiP, S5:OT                                                                                                                                          |
| 39 | Yes         | 11      | 11-A | 1000   | McF_6 | 0   | last   | wholeT_0.5  | J1:DiP, J1:OT, J5:DiP, J5:OT, S1:DiP, S1:OT, S5:DiP, S5:OT                                                                                                                                   |
| 40 | Yes         | 11      | 11-A | 1000   | McF_6 | 0   | unif   | singleC     | J1:CBN, J1:CBN-A, J1:DiP, J1:DiP-A, J1:OT, J1:OT-A, J5:CBN, J5:CBN-A, J5:DiP, J5:DiP-A, J5:OT, J5:OT-A, S1:DiP, S1:DiP-A, S1:OT, S1:OT-A, S5:CBN, S5:CBN-A, S5:DiP, S5:DiP-A, S5:OT, S5:OT-A |
| 41 | Yes         | 11      | 11-A | 1000   | McF_6 | 0   | unif   | wholeT_0.01 | J1:CBN, J1:CBN-A, J1:DiP, J1:DiP-A, J1:OT, J1:OT-A, J5:CBN, J5:CBN-A, J5:DiP, J5:DiP-A, J5:OT, J5:OT-A, S1:DiP, S1:DiP-A, S5:CBN, S5:CBN-A, S5:DiP, S5:DiP-A, S5:OT, S5:OT-A                 |
| 42 | Yes         | 11      | 11-A | 1000   | McF_6 | 0   | unif   | wholeT_0.5  | J1:CBN, J1:CBN-A, J1:DiP, J1:DiP-A, J1:OT, J1:OT-A, J5:CBN, J5:CBN-A, J5:DiP, J5:DiP-A, J5:OT, J5:OT-A, S1:DiP, S1:DiP-A, S1:OT, S1:OT-A, S5:CBN, S5:CBN-A, S5:DiP, S5:DiP-A, S5:OT, S5:OT-A |
| 43 | Yes         | 11      | 11-A | 1000   | McF_6 | Inf | last   | singleC     | J1:DiP, J1:OT, J5:DiP, J5:OT, S1:DiP, S5:DiP, S5:OT                                                                                                                                          |
| 44 | Yes         | 11      | 11-A | 1000   | McF_6 | Inf | last   | wholeT_0.01 | J1:DiP, J1:OT, J5:DiP, J5:OT, S1:DiP, S5:DiP, S5:OT                                                                                                                                          |

Table 6: (continued)

|    | Conjunction | Drivers | Tree | S.Size | Model | sh  | S.Time | S.Type      | Best method(s)                                                                                                                                                       |
|----|-------------|---------|------|--------|-------|-----|--------|-------------|----------------------------------------------------------------------------------------------------------------------------------------------------------------------|
| 45 | Yes         | 11      | 11-A | 1000   | McF_6 | Inf | last   | wholeT_0.5  | J1:DiP, J1:OT, J5:DiP, J5:OT, S1:DiP, S5:DiP, S5:OT                                                                                                                  |
| 46 | Yes         | 11      | 11-A | 1000   | McF_6 | Inf | unif   | singleC     | J1:CBN, J1:CBN-A, J1:DiP, J1:DiP-A, J1:OT, J1:OT-A, J5:CBN-A, J5:DiP, J5:DiP-A, J5:OT, J5:OT-A, S1:DiP, S1:DiP-A, S5:CBN-A, S5:DiP, S5:DiP-A, S5:OT, S5:OT-A         |
| 47 | Yes         | 11      | 11-A | 1000   | McF_6 | Inf | unif   | wholeT_0.01 | J1:CBN, J1:CBN-A, J1:DiP, J1:DiP-A, J1:OT, J1:OT-A, J5:CBN-A, J5:DiP, J5:DiP-A, J5:OT, J5:OT-A, S1:DiP, S1:DiP-A, S5:CBN, S5:CBN-A, S5:DiP, S5:DiP-A, S5:OT, S5:OT-A |
| 48 | Yes         | 11      | 11-A | 1000   | McF_6 | Inf | unif   | wholeT_0.5  | J1:CBN, J1:CBN-A, J1:DiP, J1:DiP-A, J5:CBN-A, J5:DiP, J5:DiP-A, J5:OT, J5:OT-A, S1:DiP, S1:DiP-A, S5:CBN-A, S5:DiP, S5:DiP-A, S5:OT, S5:OT-A                         |
| 49 | Yes         | 11      | 11-A | 200    | Bozic | 0   | last   | singleC     | S5:OT, S5:OT-A                                                                                                                                                       |
| 50 | Yes         | 11      | 11-A | 200    | Bozic | 0   | last   | wholeT_0.01 | J1:OT, J1:OT-A, J5:OT, J5:OT-A, S5:OT, S5:OT-A                                                                                                                       |
| 51 | Yes         | 11      | 11-A | 200    | Bozic | 0   | last   | wholeT_0.5  | S1:OT, S1:OT-A                                                                                                                                                       |
| 52 | Yes         | 11      | 11-A | 200    | Bozic | 0   | unif   | singleC     | S1:OT, S1:OT-A                                                                                                                                                       |
| 53 | Yes         | 11      | 11-A | 200    | Bozic | 0   | unif   | wholeT_0.01 | J1:CBN-A, J1:DiP, J1:DiP-A, J1:OT, J1:OT-A, S1:DiP-A, S5:CBN, S5:CBN-A, S5:DiP, S5:DiP-A, S5:OT, S5:OT-A                                                             |
| 54 | Yes         | 11      | 11-A | 200    | Bozic | 0   | unif   | wholeT_0.5  | J1:CBN, J1:CBN-A, S1:CBN, S1:CBN-A                                                                                                                                   |
| 55 | Yes         | 11      | 11-A | 200    | Bozic | Inf | last   | singleC     | J5:OT, J5:OT-A, S5:OT, S5:OT-A                                                                                                                                       |
| 56 | Yes         | 11      | 11-A | 200    | Bozic | Inf | last   | wholeT_0.01 | J5:OT, J5:OT-A                                                                                                                                                       |
| 57 | Yes         | 11      | 11-A | 200    | Bozic | Inf | last   | wholeT_0.5  | J5:OT, J5:OT-A, S5:OT, S5:OT-A                                                                                                                                       |
| 58 | Yes         | 11      | 11-A | 200    | Bozic | Inf | unif   | singleC     | J1:CBN, J1:CBN-A, J1:OT, J1:OT-A                                                                                                                                     |
| 59 | Yes         | 11      | 11-A | 200    | Bozic | Inf | unif   | wholeT_0.01 | S5:CBN, S5:CBN-A, S5:OT, S5:OT-A                                                                                                                                     |
| 60 | Yes         | 11      | 11-A | 200    | Bozic | Inf | unif   | wholeT_0.5  | J1:CBN, J1:CBN-A, J1:OT, J1:OT-A                                                                                                                                     |
| 61 | Yes         | 11      | 11-A | 200    | exp   | 0   | last   | singleC     | S1:OT, S1:OT-A                                                                                                                                                       |
| 62 | Yes         | 11      | 11-A | 200    | exp   | 0   | last   | wholeT_0.01 | J1:OT, J1:OT-A, S1:OT, S1:OT-A, S5:OT, S5:OT-A                                                                                                                       |
| 63 | Yes         | 11      | 11-A | 200    | exp   | 0   | last   | wholeT_0.5  | S1:OT, S1:OT-A                                                                                                                                                       |
| 64 | Yes         | 11      | 11-A | 200    | exp   | 0   | unif   | singleC     | S1:CBN, S1:CBN-A, S5:CBN, S5:CBN-A                                                                                                                                   |
| 65 | Yes         | 11      | 11-A | 200    | exp   | 0   | unif   | wholeT_0.01 | S1:OT, S1:OT-A                                                                                                                                                       |
| 66 | Yes         | 11      | 11-A | 200    | exp   | 0   | unif   | wholeT_0.5  | S1:CBN, S1:CBN-A, S5:CBN, S5:CBN-A                                                                                                                                   |
| 67 | Yes         | 11      | 11-A | 200    | exp   | Inf | last   | singleC     | J1:OT, J1:OT-A, S5:OT, S5:OT-A                                                                                                                                       |
| 68 | Yes         | 11      | 11-A | 200    | exp   | Inf | last   | wholeT_0.01 | J5:CBN-A, J5:OT, J5:OT-A                                                                                                                                             |

Table 6: (continued)

|    | Conjunction | Drivers | Tree | S.Size | Model | sh  | S.Time | S.Type      | Best method(s)                                                                                           |
|----|-------------|---------|------|--------|-------|-----|--------|-------------|----------------------------------------------------------------------------------------------------------|
| 69 | Yes         | 11      | 11-A | 200    | exp   | Inf | last   | wholeT_0.5  | J1:OT, J1:OT-A, S5:OT, S5:OT-A                                                                           |
| 70 | Yes         | 11      | 11-A | 200    | exp   | Inf | unif   | singleC     | S1:OT, S1:OT-A                                                                                           |
| 71 | Yes         | 11      | 11-A | 200    | exp   | Inf | unif   | wholeT_0.01 | S5:CBN-A, S5:OT, S5:OT-A                                                                                 |
| 72 | Yes         | 11      | 11-A | 200    | exp   | Inf | unif   | wholeT_0.5  | S1:OT, S1:OT-A                                                                                           |
| 73 | Yes         | 11      | 11-A | 200    | McF_4 | 0   | last   | singleC     | J1:DiP-A, J1:OT, J1:OT-A, J5:DiP-A, J5:OT, J5:OT-A, S5:DiP, S5:DiP-A, S5:OT, S5:OT-A                     |
| 74 | Yes         | 11      | 11-A | 200    | McF_4 | 0   | last   | wholeT_0.01 | J1:DiP, J1:DiP-A, J1:OT, J1:OT-A, J5:DiP-A, J5:OT, J5:OT-A, S1:DiP-A, S5:DiP, S5:DiP-A, S5:OT, S5:OT-A   |
| 75 | Yes         | 11      | 11-A | 200    | McF_4 | 0   | last   | wholeT_0.5  | J1:OT, J1:OT-A, J5:OT, J5:OT-A, S1:DiP-A, S5:DiP-A, S5:OT, S5:OT-A                                       |
| 76 | Yes         | 11      | 11-A | 200    | McF_4 | 0   | unif   | singleC     | J1:CBN-A, J1:OT, J1:OT-A, S5:OT, S5:OT-A                                                                 |
| 77 | Yes         | 11      | 11-A | 200    | McF_4 | 0   | unif   | wholeT_0.01 | J1:CBN-A, J1:DiP, J1:DiP-A, J1:OT, J1:OT-A, S1:DiP, S1:DiP-A, S5:CBN-A, S5:DiP, S5:DiP-A, S5:OT, S5:OT-A |
| 78 | Yes         | 11      | 11-A | 200    | McF_4 | 0   | unif   | wholeT_0.5  | J1:CBN-A, J1:OT, J1:OT-A, S1:DiP, S1:DiP-A, S5:CBN, S5:CBN-A, S5:OT, S5:OT-A                             |
| 79 | Yes         | 11      | 11-A | 200    | McF_4 | Inf | last   | singleC     | J1:OT, J1:OT-A, J5:OT, J5:OT-A, S1:DiP-A, S5:OT, S5:OT-A                                                 |
| 80 | Yes         | 11      | 11-A | 200    | McF_4 | Inf | last   | wholeT_0.01 | J1:DiP-A, J1:OT, J1:OT-A, J5:DiP-A, J5:OT, J5:OT-A, S5:OT                                                |
| 81 | Yes         | 11      | 11-A | 200    | McF_4 | Inf | last   | wholeT_0.5  | J1:OT, J1:OT-A, J5:OT, J5:OT-A, S5:OT, S5:OT-A                                                           |
| 82 | Yes         | 11      | 11-A | 200    | McF_4 | Inf | unif   | singleC     | J1:CBN-A, J1:OT, J1:OT-A, J5:OT, J5:OT-A, S5:CBN-A, S5:OT, S5:OT-A                                       |
| 83 | Yes         | 11      | 11-A | 200    | McF_4 | Inf | unif   | wholeT_0.01 | J1:OT, J1:OT-A, J5:OT, J5:OT-A, S5:CBN-A, S5:OT, S5:OT-A                                                 |
| 84 | Yes         | 11      | 11-A | 200    | McF_4 | Inf | unif   | wholeT_0.5  | J1:CBN-A, J1:OT, J1:OT-A, J5:OT, J5:OT-A, S5:OT, S5:OT-A                                                 |
| 85 | Yes         | 11      | 11-A | 200    | McF_6 | 0   | last   | singleC     | J1:OT, J5:OT, S1:DiP, S5:DiP, S5:OT                                                                      |
| 86 | Yes         | 11      | 11-A | 200    | McF_6 | 0   | last   | wholeT_0.01 | J1:DiP, J1:OT, J5:DiP, J5:OT, S1:DiP, S5:DiP, S5:OT                                                      |
| 87 | Yes         | 11      | 11-A | 200    | McF_6 | 0   | last   | wholeT_0.5  | J1:OT, J5:OT, S1:DiP, S5:DiP, S5:OT                                                                      |
| 88 | Yes         | 11      | 11-A | 200    | McF_6 | 0   | unif   | singleC     | J1:CBN, J1:CBN-A, J1:OT, J1:OT-A, J5:CBN, J5:CBN-A, J5:OT, J5:OT-A, S5:CBN, S5:CBN-A, S5:OT, S5:OT-A     |



Table 6: (continued)

|     | Conjunction | Drivers | Tree | S.Size | Model | sh  | S.Time | S.Type      | Best method(s)                                                                                                                                             |
|-----|-------------|---------|------|--------|-------|-----|--------|-------------|------------------------------------------------------------------------------------------------------------------------------------------------------------|
| 89  | Yes         | 11      | 11-A | 200    | McF_6 | 0   | unif   | wholeT_0.01 | J1:CBN, J1:CBN-A, J1:DiP, J1:DiP-A, J1:OT, J1:OT-A, J5:CBN, J5:CBN-A, J5:DiP, J5:DiP-A, J5:OT, J5:OT-A, S5:CBN, S5:CBN-A, S5:DiP, S5:DiP-A, S5:OT, S5:OT-A |
| 90  | Yes         | 11      | 11-A | 200    | McF_6 | 0   | unif   | wholeT_0.5  | J1:CBN, J1:CBN-A, J1:DiP, J5:CBN, J5:CBN-A, J5:DiP-A, J5:OT, J5:OT-A, S5:CBN, S5:CBN-A, S5:DiP, S5:OT, S5:OT-A                                             |
| 91  | Yes         | 11      | 11-A | 200    | McF_6 | Inf | last   | singleC     | J1:OT, J5:OT, S5:OT                                                                                                                                        |
| 92  | Yes         | 11      | 11-A | 200    | McF_6 | Inf | last   | wholeT_0.01 | J1:OT, J5:OT, S5:OT                                                                                                                                        |
| 93  | Yes         | 11      | 11-A | 200    | McF_6 | Inf | last   | wholeT_0.5  | J1:OT, J5:OT, S5:OT                                                                                                                                        |
| 94  | Yes         | 11      | 11-A | 200    | McF_6 | Inf | unif   | singleC     | J1:CBN-A, J1:OT, J1:OT-A, J5:CBN-A, J5:OT, J5:OT-A, S5:CBN, S5:CBN-A, S5:OT, S5:OT-A                                                                       |
| 95  | Yes         | 11      | 11-A | 200    | McF_6 | Inf | unif   | wholeT_0.01 | J1:CBN-A, J1:OT, J1:OT-A, J5:CBN-A, J5:OT, J5:OT-A, S5:CBN, S5:CBN-A, S5:OT, S5:OT-A                                                                       |
| 96  | Yes         | 11      | 11-A | 200    | McF_6 | Inf | unif   | wholeT_0.5  | J1:CBN-A, J1:OT, J1:OT-A, J5:CBN-A, J5:OT, J5:OT-A, S5:CBN, S5:CBN-A, S5:OT, S5:OT-A                                                                       |
| 97  | Yes         | 11      | 11-A | 100    | Bozic | 0   | last   | singleC     | S5:OT, S5:OT-A                                                                                                                                             |
| 98  | Yes         | 11      | 11-A | 100    | Bozic | 0   | last   | wholeT_0.01 | J5:OT, J5:OT-A, S5:OT, S5:OT-A                                                                                                                             |
| 99  | Yes         | 11      | 11-A | 100    | Bozic | 0   | last   | wholeT_0.5  | J1:CBN, J1:CBN-A, J1:OT, J1:OT-A, S1:OT, S1:OT-A                                                                                                           |
| 100 | Yes         | 11      | 11-A | 100    | Bozic | 0   | unif   | singleC     | S1:OT, S1:OT-A                                                                                                                                             |
| 101 | Yes         | 11      | 11-A | 100    | Bozic | 0   | unif   | wholeT_0.01 | S5:OT, S5:OT-A                                                                                                                                             |
| 102 | Yes         | 11      | 11-A | 100    | Bozic | 0   | unif   | wholeT_0.5  | S1:OT, S1:OT-A                                                                                                                                             |
| 103 | Yes         | 11      | 11-A | 100    | Bozic | Inf | last   | singleC     | J5:OT, J5:OT-A                                                                                                                                             |
| 104 | Yes         | 11      | 11-A | 100    | Bozic | Inf | last   | wholeT_0.01 | J5:CBN-A, J5:OT, J5:OT-A                                                                                                                                   |
| 105 | Yes         | 11      | 11-A | 100    | Bozic | Inf | last   | wholeT_0.5  | J5:OT, J5:OT-A                                                                                                                                             |
| 106 | Yes         | 11      | 11-A | 100    | Bozic | Inf | unif   | singleC     | J1:CBN, J1:CBN-A, J1:OT, J1:OT-A, S1:OT, S1:OT-A, S5:CBN, S5:CBN-A                                                                                         |
| 107 | Yes         | 11      | 11-A | 100    | Bozic | Inf | unif   | wholeT_0.01 | J5:OT, J5:OT-A                                                                                                                                             |
| 108 | Yes         | 11      | 11-A | 100    | Bozic | Inf | unif   | wholeT_0.5  | J1:CBN, J1:CBN-A, J1:OT, J1:OT-A, S1:OT, S1:OT-A, S5:CBN, S5:CBN-A                                                                                         |
| 109 | Yes         | 11      | 11-A | 100    | exp   | 0   | last   | singleC     | S1:OT, S1:OT-A                                                                                                                                             |
| 110 | Yes         | 11      | 11-A | 100    | exp   | 0   | last   | wholeT_0.01 | J1:OT, J1:OT-A, S5:OT, S5:OT-A                                                                                                                             |
| 111 | Yes         | 11      | 11-A | 100    | exp   | 0   | last   | wholeT_0.5  | S1:OT, S1:OT-A                                                                                                                                             |
| 112 | Yes         | 11      | 11-A | 100    | exp   | 0   | unif   | singleC     | S1:CBN, S1:CBN-A                                                                                                                                           |

Table 6: (continued)

|     | Conjunction | Drivers | Tree | S.Size | Model | sh  | S.Time | S.Type      | Best method(s)                                                                                                 |
|-----|-------------|---------|------|--------|-------|-----|--------|-------------|----------------------------------------------------------------------------------------------------------------|
| 113 | Yes         | 11      | 11-A | 100    | exp   | 0   | unif   | wholeT_0.01 | S1:OT, S1:OT-A                                                                                                 |
| 114 | Yes         | 11      | 11-A | 100    | exp   | 0   | unif   | wholeT_0.5  | S1:CBN, S1:CBN-A, S5:CBN, S5:CBN-A                                                                             |
| 115 | Yes         | 11      | 11-A | 100    | exp   | Inf | last   | singleC     | S5:OT, S5:OT-A                                                                                                 |
| 116 | Yes         | 11      | 11-A | 100    | exp   | Inf | last   | wholeT_0.01 | J5:CBN-A, J5:OT, J5:OT-A                                                                                       |
| 117 | Yes         | 11      | 11-A | 100    | exp   | Inf | last   | wholeT_0.5  | S5:OT, S5:OT-A                                                                                                 |
| 118 | Yes         | 11      | 11-A | 100    | exp   | Inf | unif   | singleC     | J1:CBN-A, J1:OT, J1:OT-A, S1:OT, S1:OT-A                                                                       |
| 119 | Yes         | 11      | 11-A | 100    | exp   | Inf | unif   | wholeT_0.01 | S5:OT, S5:OT-A                                                                                                 |
| 120 | Yes         | 11      | 11-A | 100    | exp   | Inf | unif   | wholeT_0.5  | J1:CBN, J1:CBN-A, J1:OT, J1:OT-A, S1:OT, S1:OT-A                                                               |
| 121 | Yes         | 11      | 11-A | 100    | McF_4 | 0   | last   | singleC     | J5:OT, J5:OT-A, S5:OT, S5:OT-A                                                                                 |
| 122 | Yes         | 11      | 11-A | 100    | McF_4 | 0   | last   | wholeT_0.01 | J1:DiP-A, J5:OT, J5:OT-A, S1:DiP, S1:DiP-A, S5:DiP, S5:DiP-A, S5:OT                                            |
| 123 | Yes         | 11      | 11-A | 100    | McF_4 | 0   | last   | wholeT_0.5  | J5:OT, J5:OT-A, S5:OT, S5:OT-A                                                                                 |
| 124 | Yes         | 11      | 11-A | 100    | McF_4 | 0   | unif   | singleC     | J1:CBN-A, J1:OT, J1:OT-A, S5:CBN-A, S5:OT, S5:OT-A                                                             |
| 125 | Yes         | 11      | 11-A | 100    | McF_4 | 0   | unif   | wholeT_0.01 | S5:CBN-A, S5:DiP-A, S5:OT, S5:OT-A                                                                             |
| 126 | Yes         | 11      | 11-A | 100    | McF_4 | 0   | unif   | wholeT_0.5  | J1:CBN-A, J1:OT, J1:OT-A, S5:CBN, S5:CBN-A, S5:OT, S5:OT-A                                                     |
| 127 | Yes         | 11      | 11-A | 100    | McF_4 | Inf | last   | singleC     | J5:OT, J5:OT-A, S5:OT, S5:OT-A                                                                                 |
| 128 | Yes         | 11      | 11-A | 100    | McF_4 | Inf | last   | wholeT_0.01 | J5:OT, J5:OT-A                                                                                                 |
| 129 | Yes         | 11      | 11-A | 100    | McF_4 | Inf | last   | wholeT_0.5  | J5:OT, J5:OT-A, S5:OT, S5:OT-A                                                                                 |
| 130 | Yes         | 11      | 11-A | 100    | McF_4 | Inf | unif   | singleC     | J1:OT, J1:OT-A, J5:OT, J5:OT-A, S5:CBN-A, S5:OT, S5:OT-A                                                       |
| 131 | Yes         | 11      | 11-A | 100    | McF_4 | Inf | unif   | wholeT_0.01 | J5:OT, J5:OT-A                                                                                                 |
| 132 | Yes         | 11      | 11-A | 100    | McF_4 | Inf | unif   | wholeT_0.5  | J1:CBN-A, J5:OT, J5:OT-A, S5:CBN-A, S5:OT, S5:OT-A                                                             |
| 133 | Yes         | 11      | 11-A | 100    | McF_6 | 0   | last   | singleC     | J1:OT, J5:OT, S1:DiP, S5:DiP, S5:OT                                                                            |
| 134 | Yes         | 11      | 11-A | 100    | McF_6 | 0   | last   | wholeT_0.01 | J1:DiP, J5:OT, S1:DiP, S5:DiP, S5:OT                                                                           |
| 135 | Yes         | 11      | 11-A | 100    | McF_6 | 0   | last   | wholeT_0.5  | J1:OT, J5:OT, S5:OT                                                                                            |
| 136 | Yes         | 11      | 11-A | 100    | McF_6 | 0   | unif   | singleC     | J1:CBN-A, J5:CBN, J5:CBN-A, J5:OT, J5:OT-A                                                                     |
| 137 | Yes         | 11      | 11-A | 100    | McF_6 | 0   | unif   | wholeT_0.01 | J1:DiP, J1:DiP-A, J5:CBN, J5:CBN-A, J5:DiP, J5:DiP-A, J5:OT, J5:OT-A, S1:DiP, S5:DiP, S5:DiP-A, S5:OT, S5:OT-A |
| 138 | Yes         | 11      | 11-A | 100    | McF_6 | 0   | unif   | wholeT_0.5  | J1:CBN, J1:CBN-A, J5:CBN-A, S5:CBN, S5:CBN-A                                                                   |
| 139 | Yes         | 11      | 11-A | 100    | McF_6 | Inf | last   | singleC     | J1:OT, J5:OT, S5:OT                                                                                            |
| 140 | Yes         | 11      | 11-A | 100    | McF_6 | Inf | last   | wholeT_0.01 | J5:OT, S5:OT                                                                                                   |

Table 6: (continued)

|     | Conjunction | Drivers | Tree | S.Size | Model | sh  | S.Time | S.Type      | Best method(s)                                                                                                                         |
|-----|-------------|---------|------|--------|-------|-----|--------|-------------|----------------------------------------------------------------------------------------------------------------------------------------|
| 141 | Yes         | 11      | 11-A | 100    | McF_6 | Inf | last   | wholeT_0.5  | J1:OT, J5:OT, S5:OT                                                                                                                    |
| 142 | Yes         | 11      | 11-A | 100    | McF_6 | Inf | unif   | singleC     | J1:CBN, J1:CBN-A, J5:CBN-A, J5:OT, J5:OT-A                                                                                             |
| 143 | Yes         | 11      | 11-A | 100    | McF_6 | Inf | unif   | wholeT_0.01 | J5:CBN-A, J5:OT, J5:OT-A, S5:CBN, S5:CBN-A, S5:OT, S5:OT-A                                                                             |
| 144 | Yes         | 11      | 11-A | 100    | McF_6 | Inf | unif   | wholeT_0.5  | J1:CBN-A, J1:OT, J1:OT-A, J5:CBN-A, J5:OT, J5:OT-A, S5:CBN, S5:CBN-A, S5:OT, S5:OT-A                                                   |
| 145 | Yes         | 9       | 9-A  | 1000   | Bozic | 0   | last   | singleC     | S1:OT, S1:OT-A                                                                                                                         |
| 146 | Yes         | 9       | 9-A  | 1000   | Bozic | 0   | last   | wholeT_0.01 | J1:DiP, J1:DiP-A, J1:OT, J1:OT-A, J5:DiP, J5:DiP-A, J5:OT, J5:OT-A, S1:DiP, S1:DiP-A, S1:OT, S1:OT-A, S5:DiP, S5:DiP-A, S5:OT, S5:OT-A |
| 147 | Yes         | 9       | 9-A  | 1000   | Bozic | 0   | last   | wholeT_0.5  | S1:OT, S1:OT-A                                                                                                                         |
| 148 | Yes         | 9       | 9-A  | 1000   | Bozic | 0   | unif   | singleC     | S1:CBN, S1:CBN-A, S5:CBN, S5:CBN-A                                                                                                     |
| 149 | Yes         | 9       | 9-A  | 1000   | Bozic | 0   | unif   | wholeT_0.01 | J1:DiP, J1:DiP-A, J1:OT, J1:OT-A, S1:DiP, S1:DiP-A, S1:OT, S1:OT-A                                                                     |
| 150 | Yes         | 9       | 9-A  | 1000   | Bozic | 0   | unif   | wholeT_0.5  | S1:CBN, S1:CBN-A, S5:CBN, S5:CBN-A                                                                                                     |
| 151 | Yes         | 9       | 9-A  | 1000   | Bozic | Inf | last   | singleC     | J1:DiP, J1:DiP-A, J1:OT, J1:OT-A, J5:DiP, J5:DiP-A, J5:OT, J5:OT-A, S5:OT, S5:OT-A                                                     |
| 152 | Yes         | 9       | 9-A  | 1000   | Bozic | Inf | last   | wholeT_0.01 | J5:DiP, J5:DiP-A, J5:OT, J5:OT-A                                                                                                       |
| 153 | Yes         | 9       | 9-A  | 1000   | Bozic | Inf | last   | wholeT_0.5  | J1:DiP, J1:DiP-A, J1:OT, J1:OT-A, J5:DiP, J5:DiP-A, J5:OT, J5:OT-A, S5:DiP, S5:DiP-A, S5:OT, S5:OT-A                                   |
| 154 | Yes         | 9       | 9-A  | 1000   | Bozic | Inf | unif   | singleC     | S1:CBN, S1:DiP, S1:DiP-A, S1:OT, S1:OT-A                                                                                               |
| 155 | Yes         | 9       | 9-A  | 1000   | Bozic | Inf | unif   | wholeT_0.01 | S5:DiP, S5:DiP-A, S5:OT, S5:OT-A                                                                                                       |
| 156 | Yes         | 9       | 9-A  | 1000   | Bozic | Inf | unif   | wholeT_0.5  | S1:CBN, S1:DiP-A, S1:OT, S1:OT-A                                                                                                       |
| 157 | Yes         | 9       | 9-A  | 1000   | exp   | 0   | last   | singleC     | J1:CBN, J1:CBN-A, S1:CBN, S1:CBN-A, S5:CBN, S5:CBN-A                                                                                   |
| 158 | Yes         | 9       | 9-A  | 1000   | exp   | 0   | last   | wholeT_0.01 | S1:DiP-A, S1:OT, S1:OT-A                                                                                                               |
| 159 | Yes         | 9       | 9-A  | 1000   | exp   | 0   | last   | wholeT_0.5  | J1:CBN, J1:CBN-A, S1:CBN, S1:CBN-A, S5:CBN, S5:CBN-A                                                                                   |
| 160 | Yes         | 9       | 9-A  | 1000   | exp   | 0   | unif   | singleC     | S1:CBN, S1:CBN-A, S5:CBN, S5:CBN-A                                                                                                     |
| 161 | Yes         | 9       | 9-A  | 1000   | exp   | 0   | unif   | wholeT_0.01 | J1:CBN, J1:CBN-A, S1:CBN, S1:CBN-A, S5:CBN, S5:CBN-A                                                                                   |
| 162 | Yes         | 9       | 9-A  | 1000   | exp   | 0   | unif   | wholeT_0.5  | S1:CBN, S1:CBN-A, S5:CBN, S5:CBN-A                                                                                                     |
| 163 | Yes         | 9       | 9-A  | 1000   | exp   | Inf | last   | singleC     | J1:DiP, J1:DiP-A, J1:OT, J1:OT-A, S5:DiP, S5:DiP-A, S5:OT, S5:OT-A                                                                     |

Table 6: (continued)

|     | Conjunction | Drivers | Tree | S.Size | Model | sh  | S.Time | S.Type      | Best method(s)                                                                                                                                             |
|-----|-------------|---------|------|--------|-------|-----|--------|-------------|------------------------------------------------------------------------------------------------------------------------------------------------------------|
| 164 | Yes         | 9       | 9-A  | 1000   | exp   | Inf | last   | wholeT_0.01 | J5:DiP, J5:DiP-A, J5:OT, J5:OT-A                                                                                                                           |
| 165 | Yes         | 9       | 9-A  | 1000   | exp   | Inf | last   | wholeT_0.5  | J1:DiP, J1:DiP-A, J1:OT, J1:OT-A,<br>S5:DiP, S5:DiP-A, S5:OT, S5:OT-A                                                                                      |
| 166 | Yes         | 9       | 9-A  | 1000   | exp   | Inf | unif   | singleC     | S1:OT, S1:OT-A                                                                                                                                             |
| 167 | Yes         | 9       | 9-A  | 1000   | exp   | Inf | unif   | wholeT_0.01 | J1:DiP, J1:DiP-A, J1:OT, J1:OT-A                                                                                                                           |
| 168 | Yes         | 9       | 9-A  | 1000   | exp   | Inf | unif   | wholeT_0.5  | S1:OT, S1:OT-A                                                                                                                                             |
| 169 | Yes         | 9       | 9-A  | 1000   | McF_4 | 0   | last   | singleC     | J1:DiP, J1:DiP-A, J1:OT, J1:OT-A,<br>J5:DiP, J5:DiP-A, J5:OT, J5:OT-A,<br>S1:DiP, S1:DiP-A, S1:OT, S1:OT-A,<br>S5:DiP, S5:DiP-A, S5:OT, S5:OT-A            |
| 170 | Yes         | 9       | 9-A  | 1000   | McF_4 | 0   | last   | wholeT_0.01 | J1:DiP, J1:DiP-A, J1:OT, J1:OT-A,<br>J5:CBN, J5:DiP, J5:DiP-A, J5:OT,<br>J5:OT-A, S1:DiP-A, S5:DiP, S5:DiP-A,<br>S5:OT, S5:OT-A                            |
| 171 | Yes         | 9       | 9-A  | 1000   | McF_4 | 0   | last   | wholeT_0.5  | J1:DiP, J1:DiP-A, J1:OT, J1:OT-A,<br>J5:CBN, J5:DiP, J5:DiP-A, J5:OT,<br>J5:OT-A, S1:DiP, S1:DiP-A, S1:OT,<br>S1:OT-A, S5:DiP, S5:DiP-A, S5:OT,<br>S5:OT-A |
| 172 | Yes         | 9       | 9-A  | 1000   | McF_4 | 0   | unif   | singleC     | J1:CBN-A, J1:DiP, J1:DiP-A, J1:OT,<br>J1:OT-A, S1:DiP, S1:DiP-A, S1:OT,<br>S1:OT-A, S5:DiP, S5:DiP-A, S5:OT,<br>S5:OT-A                                    |
| 173 | Yes         | 9       | 9-A  | 1000   | McF_4 | 0   | unif   | wholeT_0.01 | J1:CBN-A, J1:DiP, J1:DiP-A, J1:OT,<br>J1:OT-A, S1:DiP-A, S5:CBN-A, S5:DiP,<br>S5:DiP-A, S5:OT, S5:OT-A                                                     |
| 174 | Yes         | 9       | 9-A  | 1000   | McF_4 | 0   | unif   | wholeT_0.5  | J1:DiP, J1:DiP-A, J1:OT, J1:OT-A,<br>S1:DiP, S1:DiP-A, S1:OT, S1:OT-A,<br>S5:DiP, S5:DiP-A, S5:OT, S5:OT-A                                                 |
| 175 | Yes         | 9       | 9-A  | 1000   | McF_4 | Inf | last   | singleC     | J1:DiP, J1:DiP-A, J1:OT, J1:OT-A,<br>J5:DiP, J5:DiP-A, J5:OT, J5:OT-A,<br>S1:OT, S1:OT-A, S5:DiP, S5:DiP-A,<br>S5:OT, S5:OT-A                              |
| 176 | Yes         | 9       | 9-A  | 1000   | McF_4 | Inf | last   | wholeT_0.01 | J1:DiP, J1:OT, J5:DiP, J5:OT, S1:DiP,<br>S5:DiP, S5:OT                                                                                                     |
| 177 | Yes         | 9       | 9-A  | 1000   | McF_4 | Inf | last   | wholeT_0.5  | J1:DiP, J1:DiP-A, J1:OT, J1:OT-A,<br>J5:DiP, J5:DiP-A, J5:OT, J5:OT-A,<br>S1:DiP, S1:DiP-A, S1:OT, S1:OT-A,<br>S5:DiP, S5:DiP-A, S5:OT, S5:OT-A            |

Table 6: (continued)

|     | Conjunction | Drivers | Tree | S.Size | Model | sh  | S.Time | S.Type      | Best method(s)                                                                                                                                                                                         |
|-----|-------------|---------|------|--------|-------|-----|--------|-------------|--------------------------------------------------------------------------------------------------------------------------------------------------------------------------------------------------------|
| 178 | Yes         | 9       | 9-A  | 1000   | McF_4 | Inf | unif   | singleC     | J1:DiP, J1:DiP-A, J1:OT, J1:OT-A, S1:DiP, S1:DiP-A, S1:OT, S1:OT-A, S5:CBN-A, S5:DiP, S5:DiP-A, S5:OT, S5:OT-A                                                                                         |
| 179 | Yes         | 9       | 9-A  | 1000   | McF_4 | Inf | unif   | wholeT_0.01 | J1:DiP, J1:DiP-A, J1:OT, J1:OT-A, S5:CBN-A, S5:DiP, S5:DiP-A, S5:OT, S5:OT-A                                                                                                                           |
| 180 | Yes         | 9       | 9-A  | 1000   | McF_4 | Inf | unif   | wholeT_0.5  | J1:DiP, J1:DiP-A, J1:OT, J1:OT-A, S1:DiP, S1:DiP-A, S1:OT, S1:OT-A, S5:CBN-A, S5:DiP, S5:DiP-A, S5:OT, S5:OT-A                                                                                         |
| 181 | Yes         | 9       | 9-A  | 1000   | McF_6 | 0   | last   | singleC     | J1:DiP, J1:OT, J5:DiP, J5:OT, S1:DiP, S5:DiP, S5:OT                                                                                                                                                    |
| 182 | Yes         | 9       | 9-A  | 1000   | McF_6 | 0   | last   | wholeT_0.01 | J1:DiP, J1:OT, J5:DiP, J5:OT, S1:DiP, S5:DiP, S5:OT                                                                                                                                                    |
| 183 | Yes         | 9       | 9-A  | 1000   | McF_6 | 0   | last   | wholeT_0.5  | J1:DiP, J1:OT, J5:DiP, J5:OT, S1:DiP, S1:OT, S5:DiP, S5:OT                                                                                                                                             |
| 184 | Yes         | 9       | 9-A  | 1000   | McF_6 | 0   | unif   | singleC     | J1:CBN, J1:CBN-A, J1:DiP, J1:DiP-A, J1:OT, J1:OT-A, J5:CBN, J5:CBN-A, J5:DiP, J5:DiP-A, J5:OT, J5:OT-A, S1:DiP, S1:DiP-A, S1:OT, S1:OT-A, S5:CBN, S5:CBN-A, S5:DiP, S5:DiP-A, S5:OT, S5:OT-A           |
| 185 | Yes         | 9       | 9-A  | 1000   | McF_6 | 0   | unif   | wholeT_0.01 | J1:CBN, J1:CBN-A, J1:DiP, J1:DiP-A, J1:OT, J1:OT-A, J5:CBN, J5:CBN-A, J5:DiP, J5:DiP-A, J5:OT, J5:OT-A, S1:DiP, S5:CBN, S5:CBN-A, S5:DiP, S5:DiP-A, S5:OT, S5:OT-A                                     |
| 186 | Yes         | 9       | 9-A  | 1000   | McF_6 | 0   | unif   | wholeT_0.5  | J1:CBN, J1:CBN-A, J1:DiP, J1:DiP-A, J1:OT, J1:OT-A, J5:CBN, J5:CBN-A, J5:DiP, J5:DiP-A, J5:OT, J5:OT-A, S1:CBN-A, S1:DiP, S1:DiP-A, S1:OT, S1:OT-A, S5:CBN, S5:CBN-A, S5:DiP, S5:DiP-A, S5:OT, S5:OT-A |
| 187 | Yes         | 9       | 9-A  | 1000   | McF_6 | Inf | last   | singleC     | J1:DiP, J1:OT, J5:DiP, J5:OT, S1:DiP, S5:DiP, S5:OT                                                                                                                                                    |
| 188 | Yes         | 9       | 9-A  | 1000   | McF_6 | Inf | last   | wholeT_0.01 | J1:DiP, J1:OT, J5:DiP, J5:OT, S5:OT                                                                                                                                                                    |
| 189 | Yes         | 9       | 9-A  | 1000   | McF_6 | Inf | last   | wholeT_0.5  | J1:DiP, J1:OT, J5:DiP, J5:OT, S1:DiP, S5:DiP, S5:OT                                                                                                                                                    |

Table 6: (continued)

|     | Conjunction | Drivers | Tree | S.Size | Model | sh  | S.Time | S.Type      | Best method(s)                                                                                                                                                                               |
|-----|-------------|---------|------|--------|-------|-----|--------|-------------|----------------------------------------------------------------------------------------------------------------------------------------------------------------------------------------------|
| 190 | Yes         | 9       | 9-A  | 1000   | McF_6 | Inf | unif   | singleC     | J1:CBN, J1:CBN-A, J1:DiP, J1:DiP-A, J1:OT, J1:OT-A, J5:CBN, J5:CBN-A, J5:DiP, J5:DiP-A, J5:OT, J5:OT-A, S1:DiP, S1:DiP-A, S1:OT, S1:OT-A, S5:CBN, S5:CBN-A, S5:DiP, S5:DiP-A, S5:OT, S5:OT-A |
| 191 | Yes         | 9       | 9-A  | 1000   | McF_6 | Inf | unif   | wholeT_0.01 | J1:CBN, J1:CBN-A, J1:DiP, J1:DiP-A, J1:OT, J1:OT-A, J5:CBN, J5:CBN-A, J5:DiP, J5:DiP-A, J5:OT, J5:OT-A, S1:DiP, S1:DiP-A, S5:CBN, S5:CBN-A, S5:DiP, S5:DiP-A, S5:OT, S5:OT-A                 |
| 192 | Yes         | 9       | 9-A  | 1000   | McF_6 | Inf | unif   | wholeT_0.5  | J1:CBN, J1:CBN-A, J1:DiP, J1:DiP-A, J1:OT, J1:OT-A, J5:CBN, J5:CBN-A, J5:DiP, J5:DiP-A, J5:OT, J5:OT-A, S1:DiP, S1:DiP-A, S1:OT, S1:OT-A, S5:CBN, S5:CBN-A, S5:DiP, S5:DiP-A, S5:OT, S5:OT-A |
| 193 | Yes         | 9       | 9-A  | 200    | Bozic | 0   | last   | singleC     | S1:OT, S1:OT-A                                                                                                                                                                               |
| 194 | Yes         | 9       | 9-A  | 200    | Bozic | 0   | last   | wholeT_0.01 | J1:OT, J1:OT-A, J5:OT, J5:OT-A, S5:OT, S5:OT-A                                                                                                                                               |
| 195 | Yes         | 9       | 9-A  | 200    | Bozic | 0   | last   | wholeT_0.5  | S1:OT, S1:OT-A                                                                                                                                                                               |
| 196 | Yes         | 9       | 9-A  | 200    | Bozic | 0   | unif   | singleC     | J1:CBN, J1:CBN-A, S1:CBN, S1:CBN-A                                                                                                                                                           |
| 197 | Yes         | 9       | 9-A  | 200    | Bozic | 0   | unif   | wholeT_0.01 | S1:DiP, S1:DiP-A                                                                                                                                                                             |
| 198 | Yes         | 9       | 9-A  | 200    | Bozic | 0   | unif   | wholeT_0.5  | J1:CBN, J1:CBN-A, S1:CBN, S1:CBN-A, S5:CBN, S5:CBN-A                                                                                                                                         |
| 199 | Yes         | 9       | 9-A  | 200    | Bozic | Inf | last   | singleC     | J5:OT, J5:OT-A, S5:OT, S5:OT-A                                                                                                                                                               |
| 200 | Yes         | 9       | 9-A  | 200    | Bozic | Inf | last   | wholeT_0.01 | J5:OT, J5:OT-A                                                                                                                                                                               |
| 201 | Yes         | 9       | 9-A  | 200    | Bozic | Inf | last   | wholeT_0.5  | J5:OT, J5:OT-A, S5:OT, S5:OT-A                                                                                                                                                               |
| 202 | Yes         | 9       | 9-A  | 200    | Bozic | Inf | unif   | singleC     | S1:OT, S1:OT-A                                                                                                                                                                               |
| 203 | Yes         | 9       | 9-A  | 200    | Bozic | Inf | unif   | wholeT_0.01 | S5:OT, S5:OT-A                                                                                                                                                                               |
| 204 | Yes         | 9       | 9-A  | 200    | Bozic | Inf | unif   | wholeT_0.5  | S1:OT, S1:OT-A                                                                                                                                                                               |
| 205 | Yes         | 9       | 9-A  | 200    | exp   | 0   | last   | singleC     | J1:CBN, J1:CBN-A, S1:CBN, S1:CBN-A, S5:CBN, S5:CBN-A                                                                                                                                         |
| 206 | Yes         | 9       | 9-A  | 200    | exp   | 0   | last   | wholeT_0.01 | S1:OT, S1:OT-A                                                                                                                                                                               |
| 207 | Yes         | 9       | 9-A  | 200    | exp   | 0   | last   | wholeT_0.5  | J1:CBN, J1:CBN-A, S1:CBN, S1:CBN-A, S5:CBN, S5:CBN-A                                                                                                                                         |
| 208 | Yes         | 9       | 9-A  | 200    | exp   | 0   | unif   | singleC     | S1:CBN, S1:CBN-A, S5:CBN, S5:CBN-A                                                                                                                                                           |
| 209 | Yes         | 9       | 9-A  | 200    | exp   | 0   | unif   | wholeT_0.01 | S1:OT, S1:OT-A                                                                                                                                                                               |
| 210 | Yes         | 9       | 9-A  | 200    | exp   | 0   | unif   | wholeT_0.5  | S1:CBN, S1:CBN-A, S5:CBN, S5:CBN-A                                                                                                                                                           |
| 211 | Yes         | 9       | 9-A  | 200    | exp   | Inf | last   | singleC     | J1:OT, J1:OT-A, S5:OT, S5:OT-A                                                                                                                                                               |

Table 6: (continued)

|     | Conjunction | Drivers | Tree | S.Size | Model | sh  | S.Time | S.Type      | Best method(s)                                                                                                                                                               |
|-----|-------------|---------|------|--------|-------|-----|--------|-------------|------------------------------------------------------------------------------------------------------------------------------------------------------------------------------|
| 212 | Yes         | 9       | 9-A  | 200    | exp   | Inf | last   | wholeT_0.01 | J5:OT, J5:OT-A                                                                                                                                                               |
| 213 | Yes         | 9       | 9-A  | 200    | exp   | Inf | last   | wholeT_0.5  | J1:OT, J1:OT-A, S5:OT, S5:OT-A                                                                                                                                               |
| 214 | Yes         | 9       | 9-A  | 200    | exp   | Inf | unif   | singleC     | S1:OT, S1:OT-A                                                                                                                                                               |
| 215 | Yes         | 9       | 9-A  | 200    | exp   | Inf | unif   | wholeT_0.01 | J1:CBN, J1:OT, J1:OT-A, S5:CBN, S5:CBN-A                                                                                                                                     |
| 216 | Yes         | 9       | 9-A  | 200    | exp   | Inf | unif   | wholeT_0.5  | S1:OT, S1:OT-A                                                                                                                                                               |
| 217 | Yes         | 9       | 9-A  | 200    | McF_4 | 0   | last   | singleC     | J1:DiP-A, J1:OT, J1:OT-A, J5:DiP-A, J5:OT, J5:OT-A, S5:DiP-A, S5:OT, S5:OT-A                                                                                                 |
| 218 | Yes         | 9       | 9-A  | 200    | McF_4 | 0   | last   | wholeT_0.01 | J1:DiP, J1:DiP-A, J1:OT, J1:OT-A, J5:DiP, J5:DiP-A, J5:OT, J5:OT-A, S1:DiP, S1:DiP-A, S5:DiP, S5:DiP-A, S5:OT, S5:OT-A                                                       |
| 219 | Yes         | 9       | 9-A  | 200    | McF_4 | 0   | last   | wholeT_0.5  | J1:OT, J1:OT-A, J5:OT, J5:OT-A, S1:DiP-A, S5:DiP-A, S5:OT, S5:OT-A                                                                                                           |
| 220 | Yes         | 9       | 9-A  | 200    | McF_4 | 0   | unif   | singleC     | J1:OT, J1:OT-A, S5:CBN-A, S5:OT, S5:OT-A                                                                                                                                     |
| 221 | Yes         | 9       | 9-A  | 200    | McF_4 | 0   | unif   | wholeT_0.01 | J1:OT, J1:OT-A, S1:DiP, S1:DiP-A, S5:CBN-A, S5:DiP, S5:DiP-A, S5:OT, S5:OT-A                                                                                                 |
| 222 | Yes         | 9       | 9-A  | 200    | McF_4 | 0   | unif   | wholeT_0.5  | J1:OT, J1:OT-A, S5:OT, S5:OT-A                                                                                                                                               |
| 223 | Yes         | 9       | 9-A  | 200    | McF_4 | Inf | last   | singleC     | J5:OT, J5:OT-A, S5:OT, S5:OT-A                                                                                                                                               |
| 224 | Yes         | 9       | 9-A  | 200    | McF_4 | Inf | last   | wholeT_0.01 | J1:DiP-A, J5:DiP-A, J5:OT, S5:DiP-A, S5:OT                                                                                                                                   |
| 225 | Yes         | 9       | 9-A  | 200    | McF_4 | Inf | last   | wholeT_0.5  | J1:OT, J1:OT-A, J5:OT, J5:OT-A, S5:OT, S5:OT-A                                                                                                                               |
| 226 | Yes         | 9       | 9-A  | 200    | McF_4 | Inf | unif   | singleC     | J1:OT, J1:OT-A, S5:OT, S5:OT-A                                                                                                                                               |
| 227 | Yes         | 9       | 9-A  | 200    | McF_4 | Inf | unif   | wholeT_0.01 | J1:OT, J1:OT-A, S5:OT, S5:OT-A                                                                                                                                               |
| 228 | Yes         | 9       | 9-A  | 200    | McF_4 | Inf | unif   | wholeT_0.5  | J1:OT, J1:OT-A, S5:CBN-A, S5:OT, S5:OT-A                                                                                                                                     |
| 229 | Yes         | 9       | 9-A  | 200    | McF_6 | 0   | last   | singleC     | J1:OT, J5:OT, S1:DiP, S5:DiP, S5:OT                                                                                                                                          |
| 230 | Yes         | 9       | 9-A  | 200    | McF_6 | 0   | last   | wholeT_0.01 | J1:DiP, J5:DiP, J5:OT, S1:DiP, S5:DiP, S5:OT                                                                                                                                 |
| 231 | Yes         | 9       | 9-A  | 200    | McF_6 | 0   | last   | wholeT_0.5  | J1:OT, J5:OT, S5:OT                                                                                                                                                          |
| 232 | Yes         | 9       | 9-A  | 200    | McF_6 | 0   | unif   | singleC     | J1:CBN, J1:CBN-A, J1:DiP, J1:DiP-A, J1:OT, J1:OT-A, J5:CBN, J5:CBN-A, J5:DiP, J5:DiP-A, J5:OT, J5:OT-A, S1:DiP, S1:DiP-A, S5:CBN, S5:CBN-A, S5:DiP, S5:DiP-A, S5:OT, S5:OT-A |

Table 6: (continued)

|     | Conjunction | Drivers | Tree | S.Size | Model | sh  | S.Time | S.Type      | Best method(s)                                                                                                                                                               |
|-----|-------------|---------|------|--------|-------|-----|--------|-------------|------------------------------------------------------------------------------------------------------------------------------------------------------------------------------|
| 233 | Yes         | 9       | 9-A  | 200    | McF_6 | 0   | unif   | wholeT_0.01 | J1:CBN, J1:CBN-A, J1:DiP, J1:DiP-A, J1:OT, J1:OT-A, J5:CBN, J5:CBN-A, J5:DiP, J5:DiP-A, J5:OT, J5:OT-A, S1:DiP, S1:DiP-A, S5:CBN, S5:CBN-A, S5:DiP, S5:DiP-A, S5:OT, S5:OT-A |
| 234 | Yes         | 9       | 9-A  | 200    | McF_6 | 0   | unif   | wholeT_0.5  | J1:CBN, J1:CBN-A, J1:DiP, J1:DiP-A, J1:OT, J1:OT-A, J5:CBN, J5:CBN-A, J5:DiP, J5:DiP-A, J5:OT, J5:OT-A, S1:DiP, S1:DiP-A, S5:CBN, S5:CBN-A, S5:DiP, S5:DiP-A, S5:OT, S5:OT-A |
| 235 | Yes         | 9       | 9-A  | 200    | McF_6 | Inf | last   | singleC     | J1:OT, J5:OT, S5:OT                                                                                                                                                          |
| 236 | Yes         | 9       | 9-A  | 200    | McF_6 | Inf | last   | wholeT_0.01 | J5:OT, S5:OT                                                                                                                                                                 |
| 237 | Yes         | 9       | 9-A  | 200    | McF_6 | Inf | last   | wholeT_0.5  | J1:OT, J5:OT, S5:OT                                                                                                                                                          |
| 238 | Yes         | 9       | 9-A  | 200    | McF_6 | Inf | unif   | singleC     | J1:CBN, J1:CBN-A, J1:DiP, J1:DiP-A, J1:OT, J1:OT-A, J5:CBN, J5:CBN-A, J5:DiP-A, J5:OT, J5:OT-A, S1:DiP, S1:DiP-A, S5:CBN, S5:CBN-A, S5:DiP, S5:DiP-A, S5:OT, S5:OT-A         |
| 239 | Yes         | 9       | 9-A  | 200    | McF_6 | Inf | unif   | wholeT_0.01 | J1:CBN, J1:CBN-A, J1:DiP-A, J1:OT, J1:OT-A, J5:CBN, J5:CBN-A, J5:DiP-A, J5:OT, J5:OT-A, S1:DiP, S5:CBN, S5:CBN-A, S5:DiP, S5:DiP-A, S5:OT, S5:OT-A                           |
| 240 | Yes         | 9       | 9-A  | 200    | McF_6 | Inf | unif   | wholeT_0.5  | J1:CBN, J1:CBN-A, J1:DiP-A, J1:OT, J1:OT-A, J5:CBN, J5:CBN-A, J5:DiP-A, J5:OT, J5:OT-A, S1:DiP, S1:DiP-A, S5:CBN, S5:CBN-A, S5:DiP, S5:DiP-A, S5:OT, S5:OT-A                 |
| 241 | Yes         | 9       | 9-A  | 100    | Bozic | 0   | last   | singleC     | S1:OT, S1:OT-A                                                                                                                                                               |
| 242 | Yes         | 9       | 9-A  | 100    | Bozic | 0   | last   | wholeT_0.01 | J5:OT, J5:OT-A, S5:OT, S5:OT-A                                                                                                                                               |
| 243 | Yes         | 9       | 9-A  | 100    | Bozic | 0   | last   | wholeT_0.5  | S1:OT, S1:OT-A                                                                                                                                                               |
| 244 | Yes         | 9       | 9-A  | 100    | Bozic | 0   | unif   | singleC     | S1:CBN, S1:OT, S1:OT-A                                                                                                                                                       |
| 245 | Yes         | 9       | 9-A  | 100    | Bozic | 0   | unif   | wholeT_0.01 | J1:CBN, J1:CBN-A, J1:OT, J1:OT-A, S1:OT, S1:OT-A, S5:CBN                                                                                                                     |
| 246 | Yes         | 9       | 9-A  | 100    | Bozic | 0   | unif   | wholeT_0.5  | S1:CBN, S1:CBN-A, S1:OT, S1:OT-A                                                                                                                                             |
| 247 | Yes         | 9       | 9-A  | 100    | Bozic | Inf | last   | singleC     | S5:OT, S5:OT-A                                                                                                                                                               |
| 248 | Yes         | 9       | 9-A  | 100    | Bozic | Inf | last   | wholeT_0.01 | J5:OT, J5:OT-A                                                                                                                                                               |
| 249 | Yes         | 9       | 9-A  | 100    | Bozic | Inf | last   | wholeT_0.5  | J5:OT, J5:OT-A                                                                                                                                                               |
| 250 | Yes         | 9       | 9-A  | 100    | Bozic | Inf | unif   | singleC     | J1:CBN, J1:CBN-A, J1:OT, J1:OT-A, S1:OT, S1:OT-A                                                                                                                             |



Table 6: (continued)

|     | Conjunction | Drivers | Tree | S.Size | Model | sh  | S.Time | S.Type      | Best method(s)                                                                                       |
|-----|-------------|---------|------|--------|-------|-----|--------|-------------|------------------------------------------------------------------------------------------------------|
| 251 | Yes         | 9       | 9-A  | 100    | Bozic | Inf | unif   | wholeT_0.01 | S5:OT, S5:OT-A                                                                                       |
| 252 | Yes         | 9       | 9-A  | 100    | Bozic | Inf | unif   | wholeT_0.5  | J1:CBN, J1:CBN-A, J1:OT, J1:OT-A,<br>S1:OT, S1:OT-A                                                  |
| 253 | Yes         | 9       | 9-A  | 100    | exp   | 0   | last   | singleC     | S1:OT, S1:OT-A                                                                                       |
| 254 | Yes         | 9       | 9-A  | 100    | exp   | 0   | last   | wholeT_0.01 | S5:OT, S5:OT-A                                                                                       |
| 255 | Yes         | 9       | 9-A  | 100    | exp   | 0   | last   | wholeT_0.5  | S1:OT, S1:OT-A                                                                                       |
| 256 | Yes         | 9       | 9-A  | 100    | exp   | 0   | unif   | singleC     | S1:CBN, S1:CBN-A, S5:CBN, S5:CBN-A                                                                   |
| 257 | Yes         | 9       | 9-A  | 100    | exp   | 0   | unif   | wholeT_0.01 | J1:CBN, J1:CBN-A, S1:OT, S1:OT-A                                                                     |
| 258 | Yes         | 9       | 9-A  | 100    | exp   | 0   | unif   | wholeT_0.5  | J1:CBN, J1:CBN-A, S1:CBN, S1:CBN-A,<br>S5:CBN, S5:CBN-A                                              |
| 259 | Yes         | 9       | 9-A  | 100    | exp   | Inf | last   | singleC     | S5:OT, S5:OT-A                                                                                       |
| 260 | Yes         | 9       | 9-A  | 100    | exp   | Inf | last   | wholeT_0.01 | J5:OT, J5:OT-A                                                                                       |
| 261 | Yes         | 9       | 9-A  | 100    | exp   | Inf | last   | wholeT_0.5  | S5:OT, S5:OT-A                                                                                       |
| 262 | Yes         | 9       | 9-A  | 100    | exp   | Inf | unif   | singleC     | J1:CBN, J1:CBN-A, S1:OT, S1:OT-A                                                                     |
| 263 | Yes         | 9       | 9-A  | 100    | exp   | Inf | unif   | wholeT_0.01 | J1:OT, J1:OT-A, S1:OT, S1:OT-A,<br>S5:CBN, S5:CBN-A                                                  |
| 264 | Yes         | 9       | 9-A  | 100    | exp   | Inf | unif   | wholeT_0.5  | J1:CBN-A, S1:OT, S1:OT-A                                                                             |
| 265 | Yes         | 9       | 9-A  | 100    | McF_4 | 0   | last   | singleC     | J5:OT, J5:OT-A, S5:OT, S5:OT-A                                                                       |
| 266 | Yes         | 9       | 9-A  | 100    | McF_4 | 0   | last   | wholeT_0.01 | J1:DiP-A, J5:DiP, J5:DiP-A, J5:OT,<br>J5:OT-A, S1:DiP, S1:DiP-A, S5:DiP,<br>S5:DiP-A, S5:OT, S5:OT-A |
| 267 | Yes         | 9       | 9-A  | 100    | McF_4 | 0   | last   | wholeT_0.5  | J5:OT, J5:OT-A, S5:OT, S5:OT-A                                                                       |
| 268 | Yes         | 9       | 9-A  | 100    | McF_4 | 0   | unif   | singleC     | S5:OT, S5:OT-A                                                                                       |
| 269 | Yes         | 9       | 9-A  | 100    | McF_4 | 0   | unif   | wholeT_0.01 | S5:OT, S5:OT-A                                                                                       |
| 270 | Yes         | 9       | 9-A  | 100    | McF_4 | 0   | unif   | wholeT_0.5  | J1:OT, J1:OT-A, S5:OT, S5:OT-A                                                                       |
| 271 | Yes         | 9       | 9-A  | 100    | McF_4 | Inf | last   | singleC     | J5:OT, J5:OT-A, S5:OT, S5:OT-A                                                                       |
| 272 | Yes         | 9       | 9-A  | 100    | McF_4 | Inf | last   | wholeT_0.01 | J5:OT, S5:OT                                                                                         |
| 273 | Yes         | 9       | 9-A  | 100    | McF_4 | Inf | last   | wholeT_0.5  | J5:OT, J5:OT-A, S5:OT, S5:OT-A                                                                       |
| 274 | Yes         | 9       | 9-A  | 100    | McF_4 | Inf | unif   | singleC     | J1:OT, J1:OT-A, S5:CBN-A, S5:OT,<br>S5:OT-A                                                          |
| 275 | Yes         | 9       | 9-A  | 100    | McF_4 | Inf | unif   | wholeT_0.01 | S5:OT, S5:OT-A                                                                                       |
| 276 | Yes         | 9       | 9-A  | 100    | McF_4 | Inf | unif   | wholeT_0.5  | J1:OT, J1:OT-A, S5:OT, S5:OT-A                                                                       |
| 277 | Yes         | 9       | 9-A  | 100    | McF_6 | 0   | last   | singleC     | J5:OT, S5:OT                                                                                         |
| 278 | Yes         | 9       | 9-A  | 100    | McF_6 | 0   | last   | wholeT_0.01 | J5:OT, S5:OT                                                                                         |
| 279 | Yes         | 9       | 9-A  | 100    | McF_6 | 0   | last   | wholeT_0.5  | J5:OT, S5:OT                                                                                         |
| 280 | Yes         | 9       | 9-A  | 100    | McF_6 | 0   | unif   | singleC     | J1:CBN, J1:CBN-A, J1:OT, J5:CBN,<br>J5:CBN-A, J5:OT, J5:OT-A, S5:CBN,<br>S5:CBN-A, S5:OT             |

Table 6: (continued)

|     | Conjunction | Drivers | Tree | S.Size | Model | sh  | S.Time | S.Type      | Best method(s)                                                                               |
|-----|-------------|---------|------|--------|-------|-----|--------|-------------|----------------------------------------------------------------------------------------------|
| 281 | Yes         | 9       | 9-A  | 100    | McF_6 | 0   | unif   | wholeT_0.01 | J1:DiP, J1:DiP-A, J5:CBN, J5:CBN-A, J5:OT, J5:OT-A, S5:CBN, S5:DiP, S5:DiP-A, S5:OT, S5:OT-A |
| 282 | Yes         | 9       | 9-A  | 100    | McF_6 | 0   | unif   | wholeT_0.5  | J1:CBN, J1:CBN-A, J1:OT, J1:OT-A, J5:CBN, J5:CBN-A, J5:OT, J5:OT-A, S5:CBN-A, S5:OT, S5:OT-A |
| 283 | Yes         | 9       | 9-A  | 100    | McF_6 | Inf | last   | singleC     | J1:OT, J5:OT, S5:OT                                                                          |
| 284 | Yes         | 9       | 9-A  | 100    | McF_6 | Inf | last   | wholeT_0.01 | J5:OT, S5:OT                                                                                 |
| 285 | Yes         | 9       | 9-A  | 100    | McF_6 | Inf | last   | wholeT_0.5  | J5:OT, S5:OT                                                                                 |
| 286 | Yes         | 9       | 9-A  | 100    | McF_6 | Inf | unif   | singleC     | J1:CBN-A, J5:CBN, J5:CBN-A, J5:OT, J5:OT-A, S5:CBN, S5:CBN-A, S5:OT, S5:OT-A                 |
| 287 | Yes         | 9       | 9-A  | 100    | McF_6 | Inf | unif   | wholeT_0.01 | J5:CBN-A, J5:OT, J5:OT-A, S5:CBN, S5:OT, S5:OT-A                                             |
| 288 | Yes         | 9       | 9-A  | 100    | McF_6 | Inf | unif   | wholeT_0.5  | J1:CBN, J1:CBN-A, J1:OT, J1:OT-A, J5:CBN, J5:CBN-A, J5:OT, J5:OT-A, S5:CBN-A, S5:OT, S5:OT-A |
| 289 | Yes         | 7       | 7-A  | 1000   | Bozic | 0   | last   | singleC     | J1:CBN-A, J1:OT-A, J5:CBN-A, J5:OT-A, S1:OT-A, S5:OT-A                                       |
| 290 | Yes         | 7       | 7-A  | 1000   | Bozic | 0   | last   | wholeT_0.01 | J1:DiP-A, J1:OT-A, J5:DiP-A, J5:OT-A, S1:DiP-A, S1:OT-A, S5:DiP-A, S5:OT-A                   |
| 291 | Yes         | 7       | 7-A  | 1000   | Bozic | 0   | last   | wholeT_0.5  | J1:CBN-A, J1:OT-A, J5:CBN-A, J5:OT-A, S1:OT-A, S5:CBN-A, S5:OT-A                             |
| 292 | Yes         | 7       | 7-A  | 1000   | Bozic | 0   | unif   | singleC     | J1:CBN, J1:CBN-A, J1:OT, J1:OT-A, S1:CBN, S1:CBN-A, S1:OT, S1:OT-A                           |
| 293 | Yes         | 7       | 7-A  | 1000   | Bozic | 0   | unif   | wholeT_0.01 | J5:CBN, J5:CBN-A, J5:DiP-A, J5:OT, J5:OT-A                                                   |
| 294 | Yes         | 7       | 7-A  | 1000   | Bozic | 0   | unif   | wholeT_0.5  | NA                                                                                           |
| 295 | Yes         | 7       | 7-A  | 1000   | Bozic | Inf | last   | singleC     | J1:DiP-A, J1:OT-A, J5:DiP-A, J5:OT-A, S1:DiP-A, S5:DiP-A, S5:OT-A                            |
| 296 | Yes         | 7       | 7-A  | 1000   | Bozic | Inf | last   | wholeT_0.01 | J5:CBN-A                                                                                     |
| 297 | Yes         | 7       | 7-A  | 1000   | Bozic | Inf | last   | wholeT_0.5  | J1:DiP-A, J1:OT-A, J5:DiP-A, J5:OT-A, S1:DiP-A, S5:DiP-A, S5:OT-A                            |
| 298 | Yes         | 7       | 7-A  | 1000   | Bozic | Inf | unif   | singleC     | J1:CBN, J1:CBN-A, J5:CBN, J5:CBN-A, J5:OT, J5:OT-A, S1:CBN, S1:CBN-A, S5:CBN, S5:CBN-A       |
| 299 | Yes         | 7       | 7-A  | 1000   | Bozic | Inf | unif   | wholeT_0.01 | J5:CBN, J5:CBN-A, S5:CBN, S5:CBN-A                                                           |
| 300 | Yes         | 7       | 7-A  | 1000   | Bozic | Inf | unif   | wholeT_0.5  | J1:CBN, J1:CBN-A, S1:CBN, S1:CBN-A                                                           |
| 301 | Yes         | 7       | 7-A  | 1000   | exp   | 0   | last   | singleC     | J1:CBN-A, J1:OT-A, S1:OT-A                                                                   |

Table 6: (continued)

|     | Conjunction | Drivers | Tree | S.Size | Model | sh  | S.Time | S.Type      | Best method(s)                                                                                                                                                                 |
|-----|-------------|---------|------|--------|-------|-----|--------|-------------|--------------------------------------------------------------------------------------------------------------------------------------------------------------------------------|
| 302 | Yes         | 7       | 7-A  | 1000   | exp   | 0   | last   | wholeT_0.01 | J1:CBN, J1:CBN-A, J1:OT-A, J5:CBN-A, J5:OT-A, S1:CBN, S1:CBN-A, S1:OT-A, S5:CBN, S5:OT-A                                                                                       |
| 303 | Yes         | 7       | 7-A  | 1000   | exp   | 0   | last   | wholeT_0.5  | J1:CBN-A, J1:OT-A, S1:OT-A                                                                                                                                                     |
| 304 | Yes         | 7       | 7-A  | 1000   | exp   | 0   | unif   | singleC     | NA                                                                                                                                                                             |
| 305 | Yes         | 7       | 7-A  | 1000   | exp   | 0   | unif   | wholeT_0.01 | J1:CBN, J1:OT-A                                                                                                                                                                |
| 306 | Yes         | 7       | 7-A  | 1000   | exp   | 0   | unif   | wholeT_0.5  | NA                                                                                                                                                                             |
| 307 | Yes         | 7       | 7-A  | 1000   | exp   | Inf | last   | singleC     | J1:OT-A, J5:CBN-A, J5:OT-A, S5:OT-A                                                                                                                                            |
| 308 | Yes         | 7       | 7-A  | 1000   | exp   | Inf | last   | wholeT_0.01 | J1:CBN-A, J5:CBN-A, J5:DiP-A, J5:OT-A, S5:CBN-A, S5:DiP-A, S5:OT-A                                                                                                             |
| 309 | Yes         | 7       | 7-A  | 1000   | exp   | Inf | last   | wholeT_0.5  | J1:OT-A, J5:CBN-A, J5:OT-A, S1:OT-A, S5:OT-A                                                                                                                                   |
| 310 | Yes         | 7       | 7-A  | 1000   | exp   | Inf | unif   | singleC     | J1:CBN, J1:CBN-A, J1:OT, J1:OT-A, S1:CBN, S1:CBN-A                                                                                                                             |
| 311 | Yes         | 7       | 7-A  | 1000   | exp   | Inf | unif   | wholeT_0.01 | J1:CBN, J1:CBN-A, J5:CBN, J5:CBN-A, S5:CBN, S5:CBN-A                                                                                                                           |
| 312 | Yes         | 7       | 7-A  | 1000   | exp   | Inf | unif   | wholeT_0.5  | J1:CBN, J1:CBN-A, J1:OT, J1:OT-A, S1:CBN, S1:CBN-A                                                                                                                             |
| 313 | Yes         | 7       | 7-A  | 1000   | McF_4 | 0   | last   | singleC     | J1:DiP-A, J1:OT-A, J5:DiP-A, J5:OT-A, S1:DiP-A, S1:OT-A, S5:DiP-A, S5:OT-A                                                                                                     |
| 314 | Yes         | 7       | 7-A  | 1000   | McF_4 | 0   | last   | wholeT_0.01 | J1:DiP-A, J1:OT-A, J5:DiP-A, J5:OT-A, S5:OT, S5:OT-A                                                                                                                           |
| 315 | Yes         | 7       | 7-A  | 1000   | McF_4 | 0   | last   | wholeT_0.5  | J1:DiP-A, J1:OT-A, J5:DiP-A, J5:OT-A, S1:DiP-A, S1:OT-A, S5:DiP-A, S5:OT-A                                                                                                     |
| 316 | Yes         | 7       | 7-A  | 1000   | McF_4 | 0   | unif   | singleC     | J1:CBN-A, J1:DiP, J1:DiP-A, J1:OT, J1:OT-A, J5:CBN-A, J5:DiP, J5:DiP-A, J5:OT, J5:OT-A, S1:CBN-A, S1:DiP, S1:DiP-A, S1:OT, S1:OT-A, S5:CBN-A, S5:DiP, S5:DiP-A, S5:OT, S5:OT-A |
| 317 | Yes         | 7       | 7-A  | 1000   | McF_4 | 0   | unif   | wholeT_0.01 | J1:CBN, J1:DiP, J1:DiP-A, J1:OT, J1:OT-A, J5:CBN, J5:DiP, J5:DiP-A, J5:OT, J5:OT-A, S1:DiP, S1:DiP-A, S5:CBN, S5:DiP, S5:DiP-A, S5:OT, S5:OT-A                                 |
| 318 | Yes         | 7       | 7-A  | 1000   | McF_4 | 0   | unif   | wholeT_0.5  | J1:CBN-A, J1:DiP, J1:DiP-A, J1:OT, J1:OT-A, J5:CBN-A, J5:DiP, J5:DiP-A, J5:OT, J5:OT-A, S1:CBN-A, S1:DiP, S1:DiP-A, S1:OT, S1:OT-A, S5:CBN-A, S5:DiP, S5:DiP-A, S5:OT, S5:OT-A |

Table 6: (continued)

|     | Conjunction | Drivers | Tree | S.Size | Model | sh  | S.Time | S.Type      | Best method(s)                                                                                                                                     |
|-----|-------------|---------|------|--------|-------|-----|--------|-------------|----------------------------------------------------------------------------------------------------------------------------------------------------|
| 319 | Yes         | 7       | 7-A  | 1000   | McF_4 | Inf | last   | singleC     | J1:DiP-A, J1:OT-A, J5:DiP-A, J5:OT-A, S1:DiP-A, S1:OT-A, S5:DiP-A, S5:OT-A                                                                         |
| 320 | Yes         | 7       | 7-A  | 1000   | McF_4 | Inf | last   | wholeT_0.01 | J1:DiP-A, J5:DiP-A, J5:OT-A, S5:DiP-A, S5:OT-A                                                                                                     |
| 321 | Yes         | 7       | 7-A  | 1000   | McF_4 | Inf | last   | wholeT_0.5  | J1:DiP-A, J1:OT-A, J5:DiP-A, J5:OT-A, S1:DiP-A, S1:OT-A, S5:DiP-A, S5:OT-A                                                                         |
| 322 | Yes         | 7       | 7-A  | 1000   | McF_4 | Inf | unif   | singleC     | J1:DiP-A, J1:OT, J1:OT-A, J5:DiP-A, J5:OT, J5:OT-A, S1:DiP-A, S1:OT, S1:OT-A, S5:DiP-A, S5:OT, S5:OT-A                                             |
| 323 | Yes         | 7       | 7-A  | 1000   | McF_4 | Inf | unif   | wholeT_0.01 | J1:DiP-A, J1:OT, J1:OT-A, J5:DiP-A, J5:OT, J5:OT-A, S5:DiP-A, S5:OT, S5:OT-A                                                                       |
| 324 | Yes         | 7       | 7-A  | 1000   | McF_4 | Inf | unif   | wholeT_0.5  | J1:DiP-A, J1:OT, J1:OT-A, J5:DiP-A, J5:OT, J5:OT-A, S1:DiP-A, S1:OT, S1:OT-A, S5:DiP-A, S5:OT, S5:OT-A                                             |
| 325 | Yes         | 7       | 7-A  | 1000   | McF_6 | 0   | last   | singleC     | J1:DiP, J1:OT, J1:OT-A, J5:DiP, J5:OT, J5:OT-A, S1:DiP, S5:DiP, S5:OT, S5:OT-A                                                                     |
| 326 | Yes         | 7       | 7-A  | 1000   | McF_6 | 0   | last   | wholeT_0.01 | J1:DiP, J1:OT, J1:OT-A, J5:DiP, J5:OT, J5:OT-A, S1:DiP, S5:DiP, S5:OT, S5:OT-A                                                                     |
| 327 | Yes         | 7       | 7-A  | 1000   | McF_6 | 0   | last   | wholeT_0.5  | J1:DiP, J1:OT, J1:OT-A, J5:DiP, J5:OT, J5:OT-A, S1:DiP, S5:DiP, S5:OT, S5:OT-A                                                                     |
| 328 | Yes         | 7       | 7-A  | 1000   | McF_6 | 0   | unif   | singleC     | none                                                                                                                                               |
| 329 | Yes         | 7       | 7-A  | 1000   | McF_6 | 0   | unif   | wholeT_0.01 | J1:CBN, J1:CBN-A, J1:DiP, J1:DiP-A, J1:OT, J1:OT-A, J5:CBN-A, J5:DiP, J5:DiP-A, J5:OT, J5:OT-A, S5:CBN, S5:CBN-A, S5:DiP, S5:DiP-A, S5:OT, S5:OT-A |
| 330 | Yes         | 7       | 7-A  | 1000   | McF_6 | 0   | unif   | wholeT_0.5  | none                                                                                                                                               |
| 331 | Yes         | 7       | 7-A  | 1000   | McF_6 | Inf | last   | singleC     | J1:DiP, J1:DiP-A, J1:OT, J1:OT-A, J5:DiP, J5:DiP-A, J5:OT, J5:OT-A, S1:DiP, S1:DiP-A, S5:DiP, S5:DiP-A, S5:OT, S5:OT-A                             |
| 332 | Yes         | 7       | 7-A  | 1000   | McF_6 | Inf | last   | wholeT_0.01 | J5:OT, J5:OT-A, S5:OT, S5:OT-A                                                                                                                     |
| 333 | Yes         | 7       | 7-A  | 1000   | McF_6 | Inf | last   | wholeT_0.5  | J1:DiP, J1:DiP-A, J1:OT, J1:OT-A, J5:DiP, J5:DiP-A, J5:OT, J5:OT-A, S1:DiP, S1:DiP-A, S5:DiP, S5:DiP-A, S5:OT, S5:OT-A                             |

Table 6: (continued)

|     | Conjunction | Drivers | Tree | S.Size | Model | sh  | S.Time | S.Type      | Best method(s)                                                                                                                                                                                 |
|-----|-------------|---------|------|--------|-------|-----|--------|-------------|------------------------------------------------------------------------------------------------------------------------------------------------------------------------------------------------|
| 334 | Yes         | 7       | 7-A  | 1000   | McF_6 | Inf | unif   | singleC     | J1:CBN, J1:CBN-A, J1:DiP, J1:DiP-A, J1:OT, J1:OT-A, J5:CBN-A, J5:DiP-A, J5:OT, J5:OT-A, S1:CBN, S1:CBN-A, S1:DiP, S1:DiP-A, S1:OT, S1:OT-A, S5:CBN, S5:CBN-A, S5:DiP, S5:DiP-A, S5:OT, S5:OT-A |
| 335 | Yes         | 7       | 7-A  | 1000   | McF_6 | Inf | unif   | wholeT_0.01 | J1:CBN, J1:CBN-A, J1:DiP, J1:DiP-A, J1:OT, J1:OT-A, J5:CBN-A, J5:DiP-A, J5:OT, J5:OT-A, S5:CBN, S5:CBN-A, S5:DiP, S5:DiP-A, S5:OT, S5:OT-A                                                     |
| 336 | Yes         | 7       | 7-A  | 1000   | McF_6 | Inf | unif   | wholeT_0.5  | J1:CBN, J1:CBN-A, J1:DiP, J1:DiP-A, J1:OT, J1:OT-A, J5:CBN-A, J5:DiP-A, J5:OT, J5:OT-A, S1:CBN, S1:CBN-A, S1:DiP, S1:DiP-A, S1:OT, S1:OT-A, S5:CBN, S5:CBN-A, S5:DiP, S5:DiP-A, S5:OT, S5:OT-A |
| 337 | Yes         | 7       | 7-A  | 200    | Bozic | 0   | last   | singleC     | J1:CBN-A, J1:OT-A, J5:CBN-A, J5:OT-A, S1:OT-A, S5:CBN, S5:OT-A                                                                                                                                 |
| 338 | Yes         | 7       | 7-A  | 200    | Bozic | 0   | last   | wholeT_0.01 | J1:OT-A, J5:OT-A, S5:OT-A                                                                                                                                                                      |
| 339 | Yes         | 7       | 7-A  | 200    | Bozic | 0   | last   | wholeT_0.5  | J1:CBN-A, J1:OT-A, J5:CBN-A, J5:OT-A, S5:CBN-A, S5:OT-A                                                                                                                                        |
| 340 | Yes         | 7       | 7-A  | 200    | Bozic | 0   | unif   | singleC     | J1:CBN, J1:CBN-A, J1:OT, J1:OT-A, S1:OT, S1:OT-A                                                                                                                                               |
| 341 | Yes         | 7       | 7-A  | 200    | Bozic | 0   | unif   | wholeT_0.01 | J5:CBN, J5:OT, J5:OT-A                                                                                                                                                                         |
| 342 | Yes         | 7       | 7-A  | 200    | Bozic | 0   | unif   | wholeT_0.5  | J1:CBN, J1:CBN-A, J1:OT, J1:OT-A, S1:CBN, S1:CBN-A, S1:OT, S1:OT-A                                                                                                                             |
| 343 | Yes         | 7       | 7-A  | 200    | Bozic | Inf | last   | singleC     | J5:OT-A, S5:OT-A                                                                                                                                                                               |
| 344 | Yes         | 7       | 7-A  | 200    | Bozic | Inf | last   | wholeT_0.01 | J5:CBN-A, J5:OT-A                                                                                                                                                                              |
| 345 | Yes         | 7       | 7-A  | 200    | Bozic | Inf | last   | wholeT_0.5  | J5:OT-A, S5:OT-A                                                                                                                                                                               |
| 346 | Yes         | 7       | 7-A  | 200    | Bozic | Inf | unif   | singleC     | J1:CBN, J1:CBN-A, J5:CBN, J5:CBN-A, J5:OT, J5:OT-A, S5:CBN, S5:CBN-A                                                                                                                           |
| 347 | Yes         | 7       | 7-A  | 200    | Bozic | Inf | unif   | wholeT_0.01 | J5:CBN, J5:CBN-A, S5:CBN, S5:CBN-A                                                                                                                                                             |
| 348 | Yes         | 7       | 7-A  | 200    | Bozic | Inf | unif   | wholeT_0.5  | J1:CBN, J1:CBN-A                                                                                                                                                                               |
| 349 | Yes         | 7       | 7-A  | 200    | exp   | 0   | last   | singleC     | J1:CBN-A, J1:OT-A, S1:OT-A                                                                                                                                                                     |
| 350 | Yes         | 7       | 7-A  | 200    | exp   | 0   | last   | wholeT_0.01 | J1:CBN, J1:CBN-A, J5:CBN-A, J5:OT-A, S1:CBN, S1:CBN-A, S5:CBN                                                                                                                                  |
| 351 | Yes         | 7       | 7-A  | 200    | exp   | 0   | last   | wholeT_0.5  | J1:OT-A, S1:OT-A                                                                                                                                                                               |
| 352 | Yes         | 7       | 7-A  | 200    | exp   | 0   | unif   | singleC     | NA                                                                                                                                                                                             |
| 353 | Yes         | 7       | 7-A  | 200    | exp   | 0   | unif   | wholeT_0.01 | J1:CBN, J1:CBN-A, J1:OT, J1:OT-A                                                                                                                                                               |
| 354 | Yes         | 7       | 7-A  | 200    | exp   | 0   | unif   | wholeT_0.5  | NA                                                                                                                                                                                             |

Table 6: (continued)

|     | Conjunction | Drivers | Tree | S.Size | Model | sh  | S.Time | S.Type      | Best method(s)                                                                                                                              |
|-----|-------------|---------|------|--------|-------|-----|--------|-------------|---------------------------------------------------------------------------------------------------------------------------------------------|
| 355 | Yes         | 7       | 7-A  | 200    | exp   | Inf | last   | singleC     | J1:OT-A, J5:CBN-A, J5:OT-A, S5:OT-A                                                                                                         |
| 356 | Yes         | 7       | 7-A  | 200    | exp   | Inf | last   | wholeT_0.01 | J5:CBN-A, J5:OT-A, S5:CBN-A                                                                                                                 |
| 357 | Yes         | 7       | 7-A  | 200    | exp   | Inf | last   | wholeT_0.5  | J1:OT-A, J5:CBN-A, J5:OT-A, S5:OT-A                                                                                                         |
| 358 | Yes         | 7       | 7-A  | 200    | exp   | Inf | unif   | singleC     | J1:CBN, J1:CBN-A, J1:OT, J1:OT-A                                                                                                            |
| 359 | Yes         | 7       | 7-A  | 200    | exp   | Inf | unif   | wholeT_0.01 | J5:CBN, J5:CBN-A, J5:OT, J5:OT-A,<br>S5:CBN, S5:CBN-A                                                                                       |
| 360 | Yes         | 7       | 7-A  | 200    | exp   | Inf | unif   | wholeT_0.5  | J1:CBN, J1:CBN-A, J1:OT, J1:OT-A,<br>S1:CBN-A                                                                                               |
| 361 | Yes         | 7       | 7-A  | 200    | McF_4 | 0   | last   | singleC     | J1:OT-A, J5:OT-A, S5:OT-A                                                                                                                   |
| 362 | Yes         | 7       | 7-A  | 200    | McF_4 | 0   | last   | wholeT_0.01 | J5:OT-A, S5:OT-A                                                                                                                            |
| 363 | Yes         | 7       | 7-A  | 200    | McF_4 | 0   | last   | wholeT_0.5  | J1:OT-A, J5:OT-A, S5:OT-A                                                                                                                   |
| 364 | Yes         | 7       | 7-A  | 200    | McF_4 | 0   | unif   | singleC     | J1:CBN, J1:CBN-A, J1:OT, J1:OT-A,<br>J5:CBN, J5:CBN-A, J5:OT, J5:OT-A,<br>S5:CBN, S5:CBN-A, S5:OT, S5:OT-A                                  |
| 365 | Yes         | 7       | 7-A  | 200    | McF_4 | 0   | unif   | wholeT_0.01 | J1:CBN, J1:CBN-A, J1:DiP-A, J1:OT,<br>J1:OT-A, J5:CBN, J5:DiP-A, J5:OT,<br>J5:OT-A, S1:DiP-A, S5:CBN, S5:CBN-A,<br>S5:DiP-A, S5:OT, S5:OT-A |
| 366 | Yes         | 7       | 7-A  | 200    | McF_4 | 0   | unif   | wholeT_0.5  | J1:CBN-A, J1:OT, J1:OT-A, J5:CBN,<br>J5:CBN-A, J5:OT, J5:OT-A, S5:CBN,<br>S5:CBN-A, S5:OT, S5:OT-A                                          |
| 367 | Yes         | 7       | 7-A  | 200    | McF_4 | Inf | last   | singleC     | J1:OT-A, J5:OT-A, S5:OT-A                                                                                                                   |
| 368 | Yes         | 7       | 7-A  | 200    | McF_4 | Inf | last   | wholeT_0.01 | J5:OT-A, S5:OT-A                                                                                                                            |
| 369 | Yes         | 7       | 7-A  | 200    | McF_4 | Inf | last   | wholeT_0.5  | J1:OT-A, J5:OT-A, S5:OT-A                                                                                                                   |
| 370 | Yes         | 7       | 7-A  | 200    | McF_4 | Inf | unif   | singleC     | J1:OT, J1:OT-A, J5:CBN-A, J5:OT,<br>J5:OT-A, S5:OT, S5:OT-A                                                                                 |
| 371 | Yes         | 7       | 7-A  | 200    | McF_4 | Inf | unif   | wholeT_0.01 | J1:OT, J1:OT-A, J5:OT, J5:OT-A,<br>S5:OT, S5:OT-A                                                                                           |
| 372 | Yes         | 7       | 7-A  | 200    | McF_4 | Inf | unif   | wholeT_0.5  | J1:OT, J1:OT-A, J5:OT, J5:OT-A,<br>S5:OT, S5:OT-A                                                                                           |
| 373 | Yes         | 7       | 7-A  | 200    | McF_6 | 0   | last   | singleC     | J1:OT, J1:OT-A, J5:OT, J5:OT-A,<br>S5:OT, S5:OT-A                                                                                           |
| 374 | Yes         | 7       | 7-A  | 200    | McF_6 | 0   | last   | wholeT_0.01 | J5:OT, J5:OT-A, S5:OT, S5:OT-A                                                                                                              |
| 375 | Yes         | 7       | 7-A  | 200    | McF_6 | 0   | last   | wholeT_0.5  | J1:OT, J1:OT-A, J5:OT, J5:OT-A,<br>S5:OT, S5:OT-A                                                                                           |
| 376 | Yes         | 7       | 7-A  | 200    | McF_6 | 0   | unif   | singleC     | J1:CBN, J1:CBN-A, J1:DiP-A, J5:CBN,<br>J5:CBN-A, S1:DiP-A, S5:CBN, S5:CBN-<br>A, S5:DiP-A                                                   |

Table 6: (continued)

|     | Conjunction | Drivers | Tree | S.Size | Model | sh  | S.Time | S.Type      | Best method(s)                                                                                                                                       |
|-----|-------------|---------|------|--------|-------|-----|--------|-------------|------------------------------------------------------------------------------------------------------------------------------------------------------|
| 377 | Yes         | 7       | 7-A  | 200    | McF_6 | 0   | unif   | wholeT_0.01 | J1:CBN, J1:CBN-A, J1:DiP-A, J1:OT, J1:OT-A, J5:CBN, J5:CBN-A, J5:DiP-A, J5:OT, J5:OT-A, S1:DiP, S1:DiP-A, S5:CBN, S5:CBN-A, S5:DiP-A, S5:OT, S5:OT-A |
| 378 | Yes         | 7       | 7-A  | 200    | McF_6 | 0   | unif   | wholeT_0.5  | J1:CBN, J1:CBN-A, J5:CBN, J5:CBN-A, S5:CBN, S5:CBN-A                                                                                                 |
| 379 | Yes         | 7       | 7-A  | 200    | McF_6 | Inf | last   | singleC     | J1:DiP-A, J5:DiP-A, J5:OT, J5:OT-A, S5:DiP-A, S5:OT, S5:OT-A                                                                                         |
| 380 | Yes         | 7       | 7-A  | 200    | McF_6 | Inf | last   | wholeT_0.01 | J5:OT, J5:OT-A, S5:OT, S5:OT-A                                                                                                                       |
| 381 | Yes         | 7       | 7-A  | 200    | McF_6 | Inf | last   | wholeT_0.5  | J1:DiP-A, J1:OT, J1:OT-A, J5:DiP-A, J5:OT, J5:OT-A, S5:DiP-A, S5:OT, S5:OT-A                                                                         |
| 382 | Yes         | 7       | 7-A  | 200    | McF_6 | Inf | unif   | singleC     | J1:CBN, J1:CBN-A, J5:CBN-A, S5:CBN, S5:CBN-A                                                                                                         |
| 383 | Yes         | 7       | 7-A  | 200    | McF_6 | Inf | unif   | wholeT_0.01 | J1:CBN, J1:CBN-A, J5:CBN-A, S5:CBN, S5:CBN-A                                                                                                         |
| 384 | Yes         | 7       | 7-A  | 200    | McF_6 | Inf | unif   | wholeT_0.5  | J1:CBN, J1:CBN-A, J5:CBN-A, S5:CBN, S5:CBN-A                                                                                                         |
| 385 | Yes         | 7       | 7-A  | 100    | Bozic | 0   | last   | singleC     | J5:CBN-A, J5:OT-A, S5:CBN, S5:OT-A                                                                                                                   |
| 386 | Yes         | 7       | 7-A  | 100    | Bozic | 0   | last   | wholeT_0.01 | J5:OT-A, S5:OT-A                                                                                                                                     |
| 387 | Yes         | 7       | 7-A  | 100    | Bozic | 0   | last   | wholeT_0.5  | J5:OT-A, S5:CBN-A, S5:OT-A                                                                                                                           |
| 388 | Yes         | 7       | 7-A  | 100    | Bozic | 0   | unif   | singleC     | J1:CBN, J1:CBN-A, J1:OT, J1:OT-A, S1:OT, S1:OT-A                                                                                                     |
| 389 | Yes         | 7       | 7-A  | 100    | Bozic | 0   | unif   | wholeT_0.01 | J5:CBN, J5:CBN-A, J5:OT, J5:OT-A, S5:CBN-A                                                                                                           |
| 390 | Yes         | 7       | 7-A  | 100    | Bozic | 0   | unif   | wholeT_0.5  | J1:CBN, J1:CBN-A, J1:OT, J1:OT-A, S1:OT, S1:OT-A                                                                                                     |
| 391 | Yes         | 7       | 7-A  | 100    | Bozic | Inf | last   | singleC     | J5:OT-A                                                                                                                                              |
| 392 | Yes         | 7       | 7-A  | 100    | Bozic | Inf | last   | wholeT_0.01 | J5:CBN-A, J5:OT-A                                                                                                                                    |
| 393 | Yes         | 7       | 7-A  | 100    | Bozic | Inf | last   | wholeT_0.5  | J5:OT-A                                                                                                                                              |
| 394 | Yes         | 7       | 7-A  | 100    | Bozic | Inf | unif   | singleC     | J5:CBN, J5:CBN-A, J5:OT, J5:OT-A, S5:CBN, S5:CBN-A                                                                                                   |
| 395 | Yes         | 7       | 7-A  | 100    | Bozic | Inf | unif   | wholeT_0.01 | J5:CBN, J5:CBN-A, J5:OT, J5:OT-A, S5:CBN-A, S5:OT, S5:OT-A                                                                                           |
| 396 | Yes         | 7       | 7-A  | 100    | Bozic | Inf | unif   | wholeT_0.5  | J5:CBN, J5:CBN-A, J5:OT, J5:OT-A, S5:CBN, S5:CBN-A                                                                                                   |
| 397 | Yes         | 7       | 7-A  | 100    | exp   | 0   | last   | singleC     | J1:OT-A, S1:OT-A                                                                                                                                     |
| 398 | Yes         | 7       | 7-A  | 100    | exp   | 0   | last   | wholeT_0.01 | J1:CBN, J1:CBN-A, J5:CBN-A, J5:OT-A, S5:CBN                                                                                                          |

Table 6: (continued)

|     | Conjunction | Drivers | Tree | S.Size | Model | sh  | S.Time | S.Type      | Best method(s)                                                                               |
|-----|-------------|---------|------|--------|-------|-----|--------|-------------|----------------------------------------------------------------------------------------------|
| 399 | Yes         | 7       | 7-A  | 100    | exp   | 0   | last   | wholeT_0.5  | J1:OT-A, S1:OT-A                                                                             |
| 400 | Yes         | 7       | 7-A  | 100    | exp   | 0   | unif   | singleC     | J1:OT, J1:OT-A, S1:CBN, S1:CBN-A, S1:OT, S1:OT-A                                             |
| 401 | Yes         | 7       | 7-A  | 100    | exp   | 0   | unif   | wholeT_0.01 | J1:CBN, J1:CBN-A, J1:OT, J1:OT-A, S1:OT, S1:OT-A                                             |
| 402 | Yes         | 7       | 7-A  | 100    | exp   | 0   | unif   | wholeT_0.5  | NA                                                                                           |
| 403 | Yes         | 7       | 7-A  | 100    | exp   | Inf | last   | singleC     | J1:OT-A, J5:OT-A, S5:OT-A                                                                    |
| 404 | Yes         | 7       | 7-A  | 100    | exp   | Inf | last   | wholeT_0.01 | J5:CBN-A, J5:OT-A                                                                            |
| 405 | Yes         | 7       | 7-A  | 100    | exp   | Inf | last   | wholeT_0.5  | J1:CBN, J1:OT-A, J5:CBN-A, J5:OT-A, S5:OT-A                                                  |
| 406 | Yes         | 7       | 7-A  | 100    | exp   | Inf | unif   | singleC     | J1:CBN, J1:CBN-A, J1:OT, J1:OT-A                                                             |
| 407 | Yes         | 7       | 7-A  | 100    | exp   | Inf | unif   | wholeT_0.01 | J5:CBN, J5:CBN-A, J5:OT, J5:OT-A, S5:CBN, S5:CBN-A, S5:OT, S5:OT-A                           |
| 408 | Yes         | 7       | 7-A  | 100    | exp   | Inf | unif   | wholeT_0.5  | J1:CBN, J1:CBN-A, J1:OT, J1:OT-A, S1:OT, S1:OT-A                                             |
| 409 | Yes         | 7       | 7-A  | 100    | McF_4 | 0   | last   | singleC     | J1:OT-A, J5:OT-A, S5:OT-A                                                                    |
| 410 | Yes         | 7       | 7-A  | 100    | McF_4 | 0   | last   | wholeT_0.01 | J5:OT-A, S5:OT-A                                                                             |
| 411 | Yes         | 7       | 7-A  | 100    | McF_4 | 0   | last   | wholeT_0.5  | J1:OT-A, J5:OT-A, S5:OT-A                                                                    |
| 412 | Yes         | 7       | 7-A  | 100    | McF_4 | 0   | unif   | singleC     | J1:CBN, J1:CBN-A, J1:OT, J1:OT-A, J5:CBN, J5:CBN-A, J5:OT, J5:OT-A, S5:CBN-A, S5:OT, S5:OT-A |
| 413 | Yes         | 7       | 7-A  | 100    | McF_4 | 0   | unif   | wholeT_0.01 | J1:CBN-A, J5:CBN, J5:CBN-A, J5:OT, J5:OT-A, S5:CBN, S5:CBN-A, S5:OT, S5:OT-A                 |
| 414 | Yes         | 7       | 7-A  | 100    | McF_4 | 0   | unif   | wholeT_0.5  | J1:CBN-A, J1:OT, J1:OT-A, J5:CBN, J5:CBN-A, J5:OT, J5:OT-A, S5:CBN, S5:CBN-A, S5:OT, S5:OT-A |
| 415 | Yes         | 7       | 7-A  | 100    | McF_4 | Inf | last   | singleC     | J1:OT-A, J5:OT-A, S5:OT-A                                                                    |
| 416 | Yes         | 7       | 7-A  | 100    | McF_4 | Inf | last   | wholeT_0.01 | J5:OT-A, S5:OT-A                                                                             |
| 417 | Yes         | 7       | 7-A  | 100    | McF_4 | Inf | last   | wholeT_0.5  | J5:OT-A, S5:OT-A                                                                             |
| 418 | Yes         | 7       | 7-A  | 100    | McF_4 | Inf | unif   | singleC     | J1:OT, J1:OT-A, J5:OT, J5:OT-A, S5:CBN-A, S5:OT, S5:OT-A                                     |
| 419 | Yes         | 7       | 7-A  | 100    | McF_4 | Inf | unif   | wholeT_0.01 | J1:CBN-A, J5:CBN-A, J5:OT-A, S5:CBN-A, S5:OT, S5:OT-A                                        |
| 420 | Yes         | 7       | 7-A  | 100    | McF_4 | Inf | unif   | wholeT_0.5  | J1:OT, J1:OT-A, J5:CBN-A, J5:OT, J5:OT-A, S5:OT, S5:OT-A                                     |
| 421 | Yes         | 7       | 7-A  | 100    | McF_6 | 0   | last   | singleC     | J5:OT, J5:OT-A, S5:OT, S5:OT-A                                                               |
| 422 | Yes         | 7       | 7-A  | 100    | McF_6 | 0   | last   | wholeT_0.01 | J5:OT, J5:OT-A, S5:OT, S5:OT-A                                                               |
| 423 | Yes         | 7       | 7-A  | 100    | McF_6 | 0   | last   | wholeT_0.5  | J5:OT, J5:OT-A, S5:OT, S5:OT-A                                                               |



Table 6: (continued)

|     | Conjunction | Drivers | Tree | S.Size | Model | sh  | S.Time | S.Type      | Best method(s)                                                                                       |
|-----|-------------|---------|------|--------|-------|-----|--------|-------------|------------------------------------------------------------------------------------------------------|
| 424 | Yes         | 7       | 7-A  | 100    | McF_6 | 0   | unif   | singleC     | J1:CBN, J1:CBN-A, J5:CBN, J5:CBN-A, S5:CBN, S5:CBN-A                                                 |
| 425 | Yes         | 7       | 7-A  | 100    | McF_6 | 0   | unif   | wholeT_0.01 | J1:DiP-A, J5:CBN, J5:CBN-A, J5:DiP-A, S5:CBN, S5:CBN-A, S5:DiP-A                                     |
| 426 | Yes         | 7       | 7-A  | 100    | McF_6 | 0   | unif   | wholeT_0.5  | J1:CBN, J1:CBN-A, J5:CBN, J5:CBN-A, S5:CBN, S5:CBN-A                                                 |
| 427 | Yes         | 7       | 7-A  | 100    | McF_6 | Inf | last   | singleC     | J5:OT, J5:OT-A, S5:OT, S5:OT-A                                                                       |
| 428 | Yes         | 7       | 7-A  | 100    | McF_6 | Inf | last   | wholeT_0.01 | J5:OT, J5:OT-A, S5:OT, S5:OT-A                                                                       |
| 429 | Yes         | 7       | 7-A  | 100    | McF_6 | Inf | last   | wholeT_0.5  | J5:OT, J5:OT-A, S5:OT, S5:OT-A                                                                       |
| 430 | Yes         | 7       | 7-A  | 100    | McF_6 | Inf | unif   | singleC     | J5:CBN, J5:CBN-A, S5:CBN, S5:CBN-A                                                                   |
| 431 | Yes         | 7       | 7-A  | 100    | McF_6 | Inf | unif   | wholeT_0.01 | J5:CBN, J5:CBN-A, S5:CBN, S5:CBN-A                                                                   |
| 432 | Yes         | 7       | 7-A  | 100    | McF_6 | Inf | unif   | wholeT_0.5  | J1:CBN, J1:CBN-A, J5:CBN, J5:CBN-A, S5:CBN, S5:CBN-A                                                 |
| 433 | No          | 11      | 11-B | 1000   | Bozic | 0   | last   | singleC     | S1:OT, S1:OT-A, S5:DiP, S5:DiP-A, S5:OT, S5:OT-A                                                     |
| 434 | No          | 11      | 11-B | 1000   | Bozic | 0   | last   | wholeT_0.01 | J1:DiP, J1:DiP-A, J5:DiP, J5:DiP-A, S1:DiP, S1:DiP-A, S5:DiP, S5:DiP-A                               |
| 435 | No          | 11      | 11-B | 1000   | Bozic | 0   | last   | wholeT_0.5  | S1:OT, S1:OT-A                                                                                       |
| 436 | No          | 11      | 11-B | 1000   | Bozic | 0   | unif   | singleC     | S1:CBN, S1:CBN-A                                                                                     |
| 437 | No          | 11      | 11-B | 1000   | Bozic | 0   | unif   | wholeT_0.01 | S5:CBN-A, S5:DiP, S5:DiP-A, S5:OT, S5:OT-A                                                           |
| 438 | No          | 11      | 11-B | 1000   | Bozic | 0   | unif   | wholeT_0.5  | S1:CBN, S1:CBN-A, S5:CBN, S5:CBN-A                                                                   |
| 439 | No          | 11      | 11-B | 1000   | Bozic | Inf | last   | singleC     | J1:DiP, J1:DiP-A, J1:OT, J1:OT-A, J5:DiP, J5:DiP-A, J5:OT, J5:OT-A, S5:DiP, S5:DiP-A, S5:OT, S5:OT-A |
| 440 | No          | 11      | 11-B | 1000   | Bozic | Inf | last   | wholeT_0.01 | J5:DiP, J5:DiP-A, J5:OT, J5:OT-A                                                                     |
| 441 | No          | 11      | 11-B | 1000   | Bozic | Inf | last   | wholeT_0.5  | J1:DiP, J1:DiP-A, J1:OT, J1:OT-A, J5:DiP, J5:DiP-A, J5:OT, J5:OT-A, S5:DiP, S5:DiP-A, S5:OT, S5:OT-A |
| 442 | No          | 11      | 11-B | 1000   | Bozic | Inf | unif   | singleC     | S1:CBN, S1:CBN-A, S1:DiP, S1:DiP-A, S1:OT, S1:OT-A                                                   |
| 443 | No          | 11      | 11-B | 1000   | Bozic | Inf | unif   | wholeT_0.01 | J1:CBN-A, J1:DiP, J1:DiP-A, J1:OT, J1:OT-A, S5:CBN, S5:CBN-A, S5:DiP, S5:DiP-A, S5:OT, S5:OT-A       |
| 444 | No          | 11      | 11-B | 1000   | Bozic | Inf | unif   | wholeT_0.5  | J1:CBN, J1:CBN-A, S1:CBN, S1:CBN-A, S1:DiP-A, S1:OT, S1:OT-A                                         |
| 445 | No          | 11      | 11-B | 1000   | exp   | 0   | last   | singleC     | S1:OT, S1:OT-A                                                                                       |
| 446 | No          | 11      | 11-B | 1000   | exp   | 0   | last   | wholeT_0.01 | J1:DiP, J1:DiP-A, J1:OT, J1:OT-A, S1:DiP-A, S1:OT, S1:OT-A, S5:DiP, S5:DiP-A, S5:OT, S5:OT-A         |

Table 6: (continued)

|     | Conjunction | Drivers | Tree | S.Size | Model | sh  | S.Time | S.Type      | Best method(s)                                                                                                                                             |
|-----|-------------|---------|------|--------|-------|-----|--------|-------------|------------------------------------------------------------------------------------------------------------------------------------------------------------|
| 447 | No          | 11      | 11-B | 1000   | exp   | 0   | last   | wholeT_0.5  | S1:OT, S1:OT-A                                                                                                                                             |
| 448 | No          | 11      | 11-B | 1000   | exp   | 0   | unif   | singleC     | S1:CBN, S1:CBN-A, S5:CBN, S5:CBN-A                                                                                                                         |
| 449 | No          | 11      | 11-B | 1000   | exp   | 0   | unif   | wholeT_0.01 | S1:DiP, S1:DiP-A, S1:OT, S1:OT-A                                                                                                                           |
| 450 | No          | 11      | 11-B | 1000   | exp   | 0   | unif   | wholeT_0.5  | S1:CBN, S1:CBN-A, S5:CBN, S5:CBN-A                                                                                                                         |
| 451 | No          | 11      | 11-B | 1000   | exp   | Inf | last   | singleC     | J1:DiP, J1:DiP-A, J1:OT, J1:OT-A,<br>S1:DiP-A, S5:DiP, S5:DiP-A, S5:OT,<br>S5:OT-A                                                                         |
| 452 | No          | 11      | 11-B | 1000   | exp   | Inf | last   | wholeT_0.01 | J5:DiP, J5:DiP-A, J5:OT, J5:OT-A,<br>S5:DiP, S5:DiP-A, S5:OT, S5:OT-A                                                                                      |
| 453 | No          | 11      | 11-B | 1000   | exp   | Inf | last   | wholeT_0.5  | J1:DiP, J1:DiP-A, J1:OT, J1:OT-A,<br>S5:DiP, S5:DiP-A, S5:OT, S5:OT-A                                                                                      |
| 454 | No          | 11      | 11-B | 1000   | exp   | Inf | unif   | singleC     | S1:CBN-A, S1:OT, S1:OT-A                                                                                                                                   |
| 455 | No          | 11      | 11-B | 1000   | exp   | Inf | unif   | wholeT_0.01 | J1:DiP, J1:DiP-A, J1:OT, J1:OT-A                                                                                                                           |
| 456 | No          | 11      | 11-B | 1000   | exp   | Inf | unif   | wholeT_0.5  | S1:CBN-A, S1:OT, S1:OT-A                                                                                                                                   |
| 457 | No          | 11      | 11-B | 1000   | McF_4 | 0   | last   | singleC     | J1:CBN, J1:DiP, J1:DiP-A, J1:OT,<br>J1:OT-A, J5:CBN, J5:DiP, J5:DiP-A,<br>J5:OT, J5:OT-A, S1:DiP-A, S1:OT,<br>S1:OT-A, S5:DiP, S5:DiP-A, S5:OT,<br>S5:OT-A |
| 458 | No          | 11      | 11-B | 1000   | McF_4 | 0   | last   | wholeT_0.01 | J1:DiP, J1:DiP-A, J1:OT, J1:OT-A,<br>J5:CBN, J5:DiP, J5:DiP-A, J5:OT,<br>J5:OT-A, S1:DiP, S1:DiP-A, S5:DiP,<br>S5:DiP-A, S5:OT, S5:OT-A                    |
| 459 | No          | 11      | 11-B | 1000   | McF_4 | 0   | last   | wholeT_0.5  | J1:CBN, J1:DiP, J1:DiP-A, J1:OT,<br>J1:OT-A, J5:CBN, J5:DiP, J5:DiP-A,<br>J5:OT, J5:OT-A, S1:DiP-A, S1:OT,<br>S1:OT-A, S5:DiP, S5:DiP-A, S5:OT,<br>S5:OT-A |
| 460 | No          | 11      | 11-B | 1000   | McF_4 | 0   | unif   | singleC     | J1:CBN, J1:CBN-A, J1:DiP, J1:DiP-A,<br>J1:OT, J1:OT-A, S1:DiP, S1:DiP-A,<br>S1:OT, S1:OT-A, S5:CBN-A, S5:DiP,<br>S5:DiP-A, S5:OT, S5:OT-A                  |
| 461 | No          | 11      | 11-B | 1000   | McF_4 | 0   | unif   | wholeT_0.01 | J1:CBN-A, J1:DiP, J1:DiP-A, J1:OT,<br>J1:OT-A, S5:DiP, S5:DiP-A, S5:OT,<br>S5:OT-A                                                                         |
| 462 | No          | 11      | 11-B | 1000   | McF_4 | 0   | unif   | wholeT_0.5  | J1:CBN-A, J1:DiP, J1:DiP-A, J1:OT,<br>J1:OT-A, S1:DiP, S1:DiP-A, S1:OT,<br>S1:OT-A, S5:CBN, S5:DiP, S5:DiP-A,<br>S5:OT, S5:OT-A                            |

Table 6: (continued)

|     | Conjunction | Drivers | Tree | S.Size | Model | sh  | S.Time | S.Type      | Best method(s)                                                                                                                                                                               |
|-----|-------------|---------|------|--------|-------|-----|--------|-------------|----------------------------------------------------------------------------------------------------------------------------------------------------------------------------------------------|
| 463 | No          | 11      | 11-B | 1000   | McF_4 | Inf | last   | singleC     | J1:DiP, J1:DiP-A, J1:OT, J1:OT-A, J5:DiP, J5:DiP-A, J5:OT, J5:OT-A, S1:OT, S1:OT-A, S5:DiP, S5:DiP-A, S5:OT, S5:OT-A                                                                         |
| 464 | No          | 11      | 11-B | 1000   | McF_4 | Inf | last   | wholeT_0.01 | J1:DiP, J1:DiP-A, J1:OT, J1:OT-A, J5:DiP, J5:DiP-A, J5:OT, J5:OT-A, S1:DiP, S1:DiP-A, S5:DiP, S5:DiP-A, S5:OT, S5:OT-A                                                                       |
| 465 | No          | 11      | 11-B | 1000   | McF_4 | Inf | last   | wholeT_0.5  | J1:DiP, J1:DiP-A, J1:OT, J1:OT-A, J5:DiP, J5:DiP-A, J5:OT, J5:OT-A, S1:DiP-A, S1:OT, S1:OT-A, S5:DiP, S5:DiP-A, S5:OT, S5:OT-A                                                               |
| 466 | No          | 11      | 11-B | 1000   | McF_4 | Inf | unif   | singleC     | J1:CBN-A, J1:DiP, J1:DiP-A, J1:OT, J1:OT-A, S1:DiP, S1:DiP-A, S1:OT, S1:OT-A, S5:DiP, S5:DiP-A, S5:OT, S5:OT-A                                                                               |
| 467 | No          | 11      | 11-B | 1000   | McF_4 | Inf | unif   | wholeT_0.01 | J1:CBN-A, J1:DiP, J1:DiP-A, J1:OT, J1:OT-A, S5:DiP, S5:DiP-A, S5:OT, S5:OT-A                                                                                                                 |
| 468 | No          | 11      | 11-B | 1000   | McF_4 | Inf | unif   | wholeT_0.5  | J1:CBN-A, J1:DiP, J1:DiP-A, J1:OT, J1:OT-A, S1:DiP, S1:DiP-A, S1:OT, S1:OT-A, S5:CBN-A, S5:DiP, S5:DiP-A, S5:OT, S5:OT-A                                                                     |
| 469 | No          | 11      | 11-B | 1000   | McF_6 | 0   | last   | singleC     | J1:DiP, J1:OT, J5:DiP, J5:OT, S1:DiP, S5:DiP, S5:OT                                                                                                                                          |
| 470 | No          | 11      | 11-B | 1000   | McF_6 | 0   | last   | wholeT_0.01 | J1:DiP, J1:OT, J5:DiP, J5:OT, S1:DiP, S5:DiP, S5:OT                                                                                                                                          |
| 471 | No          | 11      | 11-B | 1000   | McF_6 | 0   | last   | wholeT_0.5  | J1:DiP, J1:OT, J5:DiP, J5:OT, S1:DiP, S5:DiP, S5:OT                                                                                                                                          |
| 472 | No          | 11      | 11-B | 1000   | McF_6 | 0   | unif   | singleC     | J1:CBN, J1:CBN-A, J1:DiP, J1:DiP-A, J1:OT, J1:OT-A, J5:CBN, J5:CBN-A, J5:DiP, J5:DiP-A, J5:OT, J5:OT-A, S1:DiP, S1:DiP-A, S1:OT, S1:OT-A, S5:CBN, S5:CBN-A, S5:DiP, S5:DiP-A, S5:OT, S5:OT-A |
| 473 | No          | 11      | 11-B | 1000   | McF_6 | 0   | unif   | wholeT_0.01 | J1:CBN, J1:CBN-A, J1:DiP, J1:DiP-A, J1:OT, J1:OT-A, J5:CBN, J5:CBN-A, J5:DiP, J5:DiP-A, J5:OT, J5:OT-A, S1:DiP, S1:DiP-A, S5:CBN, S5:DiP, S5:DiP-A, S5:OT, S5:OT-A                           |

Table 6: (continued)

|     | Conjunction | Drivers | Tree | S.Size | Model | sh  | S.Time | S.Type      | Best method(s)                                                                                                                                                                               |
|-----|-------------|---------|------|--------|-------|-----|--------|-------------|----------------------------------------------------------------------------------------------------------------------------------------------------------------------------------------------|
| 474 | No          | 11      | 11-B | 1000   | McF_6 | 0   | unif   | wholeT_0.5  | J1:CBN, J1:CBN-A, J1:DiP, J1:DiP-A, J1:OT, J1:OT-A, J5:CBN, J5:CBN-A, J5:DiP, J5:DiP-A, J5:OT, J5:OT-A, S1:DiP, S1:DiP-A, S1:OT, S1:OT-A, S5:CBN, S5:CBN-A, S5:DiP, S5:DiP-A, S5:OT, S5:OT-A |
| 475 | No          | 11      | 11-B | 1000   | McF_6 | Inf | last   | singleC     | J1:DiP, J1:OT, J5:DiP, J5:OT, S1:DiP, S5:DiP, S5:OT                                                                                                                                          |
| 476 | No          | 11      | 11-B | 1000   | McF_6 | Inf | last   | wholeT_0.01 | J1:DiP, J1:OT, J5:DiP, J5:OT, S1:DiP, S5:DiP, S5:OT                                                                                                                                          |
| 477 | No          | 11      | 11-B | 1000   | McF_6 | Inf | last   | wholeT_0.5  | J1:DiP, J1:OT, J5:DiP, J5:OT, S1:DiP, S1:OT, S5:DiP, S5:OT                                                                                                                                   |
| 478 | No          | 11      | 11-B | 1000   | McF_6 | Inf | unif   | singleC     | J1:CBN-A, J1:DiP, J1:DiP-A, J1:OT, J1:OT-A, J5:CBN-A, J5:DiP, J5:DiP-A, J5:OT, J5:OT-A, S1:DiP, S1:DiP-A, S5:CBN, S5:CBN-A, S5:DiP, S5:DiP-A, S5:OT, S5:OT-A                                 |
| 479 | No          | 11      | 11-B | 1000   | McF_6 | Inf | unif   | wholeT_0.01 | J1:CBN-A, J1:DiP, J1:DiP-A, J1:OT, J1:OT-A, J5:CBN-A, J5:DiP, J5:DiP-A, J5:OT, J5:OT-A, S1:DiP, S1:DiP-A, S5:CBN, S5:DiP, S5:DiP-A, S5:OT, S5:OT-A                                           |
| 480 | No          | 11      | 11-B | 1000   | McF_6 | Inf | unif   | wholeT_0.5  | J1:CBN, J1:CBN-A, J1:DiP, J1:DiP-A, J1:OT, J1:OT-A, J5:CBN-A, J5:DiP, J5:DiP-A, J5:OT, J5:OT-A, S1:DiP, S1:DiP-A, S5:CBN, S5:CBN-A, S5:DiP, S5:DiP-A, S5:OT, S5:OT-A                         |
| 481 | No          | 11      | 11-B | 200    | Bozic | 0   | last   | singleC     | S5:OT, S5:OT-A                                                                                                                                                                               |
| 482 | No          | 11      | 11-B | 200    | Bozic | 0   | last   | wholeT_0.01 | J1:OT, J1:OT-A, J5:OT, J5:OT-A, S5:OT, S5:OT-A                                                                                                                                               |
| 483 | No          | 11      | 11-B | 200    | Bozic | 0   | last   | wholeT_0.5  | S1:OT, S1:OT-A                                                                                                                                                                               |
| 484 | No          | 11      | 11-B | 200    | Bozic | 0   | unif   | singleC     | S1:OT, S1:OT-A                                                                                                                                                                               |
| 485 | No          | 11      | 11-B | 200    | Bozic | 0   | unif   | wholeT_0.01 | J1:CBN, J1:CBN-A, S5:DiP-A, S5:OT, S5:OT-A                                                                                                                                                   |
| 486 | No          | 11      | 11-B | 200    | Bozic | 0   | unif   | wholeT_0.5  | S1:CBN, S1:CBN-A                                                                                                                                                                             |
| 487 | No          | 11      | 11-B | 200    | Bozic | Inf | last   | singleC     | J5:OT, J5:OT-A, S5:OT, S5:OT-A                                                                                                                                                               |
| 488 | No          | 11      | 11-B | 200    | Bozic | Inf | last   | wholeT_0.01 | J5:OT, J5:OT-A                                                                                                                                                                               |
| 489 | No          | 11      | 11-B | 200    | Bozic | Inf | last   | wholeT_0.5  | J5:OT, J5:OT-A, S5:OT, S5:OT-A                                                                                                                                                               |
| 490 | No          | 11      | 11-B | 200    | Bozic | Inf | unif   | singleC     | J1:CBN, J1:CBN-A, J1:OT, J1:OT-A                                                                                                                                                             |

Table 6: (continued)

|     | Conjunction | Drivers | Tree | S.Size | Model | sh  | S.Time | S.Type      | Best method(s)                                                                                                                 |
|-----|-------------|---------|------|--------|-------|-----|--------|-------------|--------------------------------------------------------------------------------------------------------------------------------|
| 491 | No          | 11      | 11-B | 200    | Bozic | Inf | unif   | wholeT_0.01 | J5:CBN, J5:CBN-A, S5:CBN, S5:CBN-A, S5:OT, S5:OT-A                                                                             |
| 492 | No          | 11      | 11-B | 200    | Bozic | Inf | unif   | wholeT_0.5  | J1:CBN, J1:CBN-A, J1:OT, J1:OT-A                                                                                               |
| 493 | No          | 11      | 11-B | 200    | exp   | 0   | last   | singleC     | S1:OT, S1:OT-A                                                                                                                 |
| 494 | No          | 11      | 11-B | 200    | exp   | 0   | last   | wholeT_0.01 | J1:OT, J1:OT-A, S1:OT, S1:OT-A, S5:OT, S5:OT-A                                                                                 |
| 495 | No          | 11      | 11-B | 200    | exp   | 0   | last   | wholeT_0.5  | S1:OT, S1:OT-A                                                                                                                 |
| 496 | No          | 11      | 11-B | 200    | exp   | 0   | unif   | singleC     | S1:CBN, S1:CBN-A, S5:CBN, S5:CBN-A                                                                                             |
| 497 | No          | 11      | 11-B | 200    | exp   | 0   | unif   | wholeT_0.01 | S1:OT, S1:OT-A                                                                                                                 |
| 498 | No          | 11      | 11-B | 200    | exp   | 0   | unif   | wholeT_0.5  | S1:CBN, S1:CBN-A, S5:CBN, S5:CBN-A                                                                                             |
| 499 | No          | 11      | 11-B | 200    | exp   | Inf | last   | singleC     | J1:OT, J1:OT-A, S5:OT, S5:OT-A                                                                                                 |
| 500 | No          | 11      | 11-B | 200    | exp   | Inf | last   | wholeT_0.01 | J5:OT, J5:OT-A                                                                                                                 |
| 501 | No          | 11      | 11-B | 200    | exp   | Inf | last   | wholeT_0.5  | J1:OT, J1:OT-A, S5:OT, S5:OT-A                                                                                                 |
| 502 | No          | 11      | 11-B | 200    | exp   | Inf | unif   | singleC     | S1:OT, S1:OT-A                                                                                                                 |
| 503 | No          | 11      | 11-B | 200    | exp   | Inf | unif   | wholeT_0.01 | S5:OT, S5:OT-A                                                                                                                 |
| 504 | No          | 11      | 11-B | 200    | exp   | Inf | unif   | wholeT_0.5  | J1:CBN-A, S1:OT, S1:OT-A                                                                                                       |
| 505 | No          | 11      | 11-B | 200    | McF_4 | 0   | last   | singleC     | J1:DiP-A, J1:OT, J1:OT-A, J5:DiP-A, J5:OT, J5:OT-A, S1:DiP-A, S5:DiP, S5:DiP-A, S5:OT, S5:OT-A                                 |
| 506 | No          | 11      | 11-B | 200    | McF_4 | 0   | last   | wholeT_0.01 | J1:DiP, J1:DiP-A, J1:OT, J1:OT-A, J5:CBN, J5:DiP, J5:DiP-A, J5:OT, J5:OT-A, S1:DiP, S1:DiP-A, S5:DiP, S5:DiP-A, S5:OT, S5:OT-A |
| 507 | No          | 11      | 11-B | 200    | McF_4 | 0   | last   | wholeT_0.5  | J1:DiP-A, J1:OT, J1:OT-A, J5:DiP-A, J5:OT, J5:OT-A, S5:DiP, S5:DiP-A, S5:OT, S5:OT-A                                           |
| 508 | No          | 11      | 11-B | 200    | McF_4 | 0   | unif   | singleC     | J1:CBN, J1:CBN-A, J1:OT, J1:OT-A, S5:DiP, S5:DiP-A, S5:OT, S5:OT-A                                                             |
| 509 | No          | 11      | 11-B | 200    | McF_4 | 0   | unif   | wholeT_0.01 | J1:CBN-A, J1:DiP, J1:DiP-A, J1:OT, J1:OT-A, S1:DiP, S1:DiP-A, S5:DiP, S5:DiP-A, S5:OT, S5:OT-A                                 |
| 510 | No          | 11      | 11-B | 200    | McF_4 | 0   | unif   | wholeT_0.5  | J1:CBN-A, J1:OT, J1:OT-A, S5:CBN-A, S5:OT, S5:OT-A                                                                             |
| 511 | No          | 11      | 11-B | 200    | McF_4 | Inf | last   | singleC     | J1:OT, J1:OT-A, J5:OT, J5:OT-A, S5:OT, S5:OT-A                                                                                 |
| 512 | No          | 11      | 11-B | 200    | McF_4 | Inf | last   | wholeT_0.01 | J1:DiP-A, J1:OT, J1:OT-A, J5:OT, J5:OT-A, S1:DiP-A, S5:DiP-A, S5:OT, S5:OT-A                                                   |
| 513 | No          | 11      | 11-B | 200    | McF_4 | Inf | last   | wholeT_0.5  | J1:OT, J1:OT-A, J5:OT, J5:OT-A, S5:OT, S5:OT-A                                                                                 |

Table 6: (continued)

|     | Conjunction | Drivers | Tree | S.Size | Model | sh  | S.Time | S.Type      | Best method(s)                                                                                                                                     |
|-----|-------------|---------|------|--------|-------|-----|--------|-------------|----------------------------------------------------------------------------------------------------------------------------------------------------|
| 514 | No          | 11      | 11-B | 200    | McF_4 | Inf | unif   | singleC     | J1:CBN-A, J1:OT, J1:OT-A, S5:CBN-A, S5:OT, S5:OT-A                                                                                                 |
| 515 | No          | 11      | 11-B | 200    | McF_4 | Inf | unif   | wholeT_0.01 | J1:OT, J1:OT-A, J5:OT, J5:OT-A, S5:CBN-A, S5:OT, S5:OT-A                                                                                           |
| 516 | No          | 11      | 11-B | 200    | McF_4 | Inf | unif   | wholeT_0.5  | J1:CBN-A, J1:OT, J1:OT-A, S5:OT, S5:OT-A                                                                                                           |
| 517 | No          | 11      | 11-B | 200    | McF_6 | 0   | last   | singleC     | J1:DiP, J1:OT, J5:DiP, J5:OT, S1:DiP, S5:DiP, S5:OT                                                                                                |
| 518 | No          | 11      | 11-B | 200    | McF_6 | 0   | last   | wholeT_0.01 | J1:DiP, J1:OT, J5:DiP, J5:OT, S1:DiP, S5:DiP, S5:OT                                                                                                |
| 519 | No          | 11      | 11-B | 200    | McF_6 | 0   | last   | wholeT_0.5  | J1:DiP, J1:OT, J5:OT, S1:DiP, S5:DiP, S5:OT                                                                                                        |
| 520 | No          | 11      | 11-B | 200    | McF_6 | 0   | unif   | singleC     | J1:CBN, J1:CBN-A, J1:DiP, J1:OT, J1:OT-A, J5:CBN, J5:CBN-A, J5:DiP, J5:DiP-A, J5:OT, J5:OT-A, S5:CBN, S5:CBN-A, S5:OT, S5:OT-A                     |
| 521 | No          | 11      | 11-B | 200    | McF_6 | 0   | unif   | wholeT_0.01 | J1:CBN, J1:CBN-A, J1:DiP, J1:DiP-A, J1:OT, J1:OT-A, J5:CBN, J5:CBN-A, J5:DiP, J5:DiP-A, J5:OT, J5:OT-A, S5:CBN-A, S5:DiP, S5:DiP-A, S5:OT, S5:OT-A |
| 522 | No          | 11      | 11-B | 200    | McF_6 | 0   | unif   | wholeT_0.5  | J1:CBN, J1:CBN-A, J1:DiP, J1:OT, J1:OT-A, J5:CBN, J5:CBN-A, J5:DiP-A, J5:OT, J5:OT-A, S5:OT, S5:OT-A                                               |
| 523 | No          | 11      | 11-B | 200    | McF_6 | Inf | last   | singleC     | J1:OT, J5:OT, S5:OT                                                                                                                                |
| 524 | No          | 11      | 11-B | 200    | McF_6 | Inf | last   | wholeT_0.01 | J5:OT, S1:DiP, S5:DiP, S5:OT                                                                                                                       |
| 525 | No          | 11      | 11-B | 200    | McF_6 | Inf | last   | wholeT_0.5  | J1:OT, J5:OT, S1:DiP, S5:DiP, S5:OT                                                                                                                |
| 526 | No          | 11      | 11-B | 200    | McF_6 | Inf | unif   | singleC     | J1:CBN, J1:CBN-A, J1:OT, J1:OT-A, J5:CBN-A, J5:DiP-A, J5:OT, J5:OT-A, S5:CBN-A, S5:OT, S5:OT-A                                                     |
| 527 | No          | 11      | 11-B | 200    | McF_6 | Inf | unif   | wholeT_0.01 | J1:CBN-A, J1:OT, J1:OT-A, J5:CBN-A, J5:DiP-A, J5:OT, J5:OT-A, S5:CBN, S5:OT, S5:OT-A                                                               |
| 528 | No          | 11      | 11-B | 200    | McF_6 | Inf | unif   | wholeT_0.5  | J1:CBN-A, J5:CBN-A, J5:OT, J5:OT-A, S5:CBN-A                                                                                                       |
| 529 | No          | 11      | 11-B | 100    | Bozic | 0   | last   | singleC     | S5:OT, S5:OT-A                                                                                                                                     |
| 530 | No          | 11      | 11-B | 100    | Bozic | 0   | last   | wholeT_0.01 | J5:CBN-A, J5:OT, J5:OT-A, S5:OT, S5:OT-A                                                                                                           |
| 531 | No          | 11      | 11-B | 100    | Bozic | 0   | last   | wholeT_0.5  | J1:OT, J1:OT-A, S1:OT, S1:OT-A                                                                                                                     |
| 532 | No          | 11      | 11-B | 100    | Bozic | 0   | unif   | singleC     | S1:OT, S1:OT-A                                                                                                                                     |

Table 6: (continued)

|     | Conjunction | Drivers | Tree | S.Size | Model | sh  | S.Time | S.Type      | Best method(s)                                                                                 |
|-----|-------------|---------|------|--------|-------|-----|--------|-------------|------------------------------------------------------------------------------------------------|
| 533 | No          | 11      | 11-B | 100    | Bozic | 0   | unif   | wholeT_0.01 | J1:CBN-A, J1:OT, J1:OT-A, S5:OT, S5:OT-A                                                       |
| 534 | No          | 11      | 11-B | 100    | Bozic | 0   | unif   | wholeT_0.5  | J1:CBN, S1:OT, S1:OT-A                                                                         |
| 535 | No          | 11      | 11-B | 100    | Bozic | Inf | last   | singleC     | J5:OT, J5:OT-A                                                                                 |
| 536 | No          | 11      | 11-B | 100    | Bozic | Inf | last   | wholeT_0.01 | J5:OT, J5:OT-A                                                                                 |
| 537 | No          | 11      | 11-B | 100    | Bozic | Inf | last   | wholeT_0.5  | J5:OT, J5:OT-A                                                                                 |
| 538 | No          | 11      | 11-B | 100    | Bozic | Inf | unif   | singleC     | J1:OT, J1:OT-A, J5:CBN, J5:CBN-A, S1:OT, S1:OT-A, S5:CBN, S5:CBN-A                             |
| 539 | No          | 11      | 11-B | 100    | Bozic | Inf | unif   | wholeT_0.01 | J5:CBN, J5:CBN-A, S5:CBN, S5:CBN-A, S5:OT, S5:OT-A                                             |
| 540 | No          | 11      | 11-B | 100    | Bozic | Inf | unif   | wholeT_0.5  | J1:CBN, J1:CBN-A, J1:OT, J1:OT-A, S1:OT, S1:OT-A, S5:CBN, S5:CBN-A                             |
| 541 | No          | 11      | 11-B | 100    | exp   | 0   | last   | singleC     | S1:OT, S1:OT-A                                                                                 |
| 542 | No          | 11      | 11-B | 100    | exp   | 0   | last   | wholeT_0.01 | J1:OT, J1:OT-A, S5:OT, S5:OT-A                                                                 |
| 543 | No          | 11      | 11-B | 100    | exp   | 0   | last   | wholeT_0.5  | S1:OT, S1:OT-A                                                                                 |
| 544 | No          | 11      | 11-B | 100    | exp   | 0   | unif   | singleC     | J1:CBN, J1:CBN-A, S1:CBN-A, S1:OT, S1:OT-A                                                     |
| 545 | No          | 11      | 11-B | 100    | exp   | 0   | unif   | wholeT_0.01 | S1:OT, S1:OT-A                                                                                 |
| 546 | No          | 11      | 11-B | 100    | exp   | 0   | unif   | wholeT_0.5  | J1:CBN, J1:CBN-A, S1:OT, S1:OT-A                                                               |
| 547 | No          | 11      | 11-B | 100    | exp   | Inf | last   | singleC     | J5:OT, J5:OT-A, S5:OT, S5:OT-A                                                                 |
| 548 | No          | 11      | 11-B | 100    | exp   | Inf | last   | wholeT_0.01 | J5:CBN-A, J5:OT, J5:OT-A                                                                       |
| 549 | No          | 11      | 11-B | 100    | exp   | Inf | last   | wholeT_0.5  | S5:OT, S5:OT-A                                                                                 |
| 550 | No          | 11      | 11-B | 100    | exp   | Inf | unif   | singleC     | J1:CBN, J1:OT, J1:OT-A, S1:OT, S1:OT-A, S5:CBN, S5:CBN-A                                       |
| 551 | No          | 11      | 11-B | 100    | exp   | Inf | unif   | wholeT_0.01 | S5:CBN-A, S5:OT, S5:OT-A                                                                       |
| 552 | No          | 11      | 11-B | 100    | exp   | Inf | unif   | wholeT_0.5  | J1:CBN-A, J1:OT, J1:OT-A, S1:OT, S1:OT-A                                                       |
| 553 | No          | 11      | 11-B | 100    | McF_4 | 0   | last   | singleC     | J5:OT, J5:OT-A, S5:OT, S5:OT-A                                                                 |
| 554 | No          | 11      | 11-B | 100    | McF_4 | 0   | last   | wholeT_0.01 | J1:DiP, J1:DiP-A, J5:DiP-A, J5:OT, J5:OT-A, S1:DiP, S1:DiP-A, S5:DiP, S5:DiP-A, S5:OT, S5:OT-A |
| 555 | No          | 11      | 11-B | 100    | McF_4 | 0   | last   | wholeT_0.5  | J5:OT, J5:OT-A, S5:OT, S5:OT-A                                                                 |
| 556 | No          | 11      | 11-B | 100    | McF_4 | 0   | unif   | singleC     | J1:CBN-A, J1:OT, J1:OT-A, S5:CBN-A, S5:OT, S5:OT-A                                             |
| 557 | No          | 11      | 11-B | 100    | McF_4 | 0   | unif   | wholeT_0.01 | J1:DiP, J1:DiP-A, S1:DiP, S1:DiP-A, S5:CBN, S5:CBN-A, S5:DiP, S5:DiP-A, S5:OT, S5:OT-A         |
| 558 | No          | 11      | 11-B | 100    | McF_4 | 0   | unif   | wholeT_0.5  | J1:CBN-A, J1:OT, J1:OT-A, S5:CBN, S5:OT, S5:OT-A                                               |
| 559 | No          | 11      | 11-B | 100    | McF_4 | Inf | last   | singleC     | J5:OT, J5:OT-A, S5:OT, S5:OT-A                                                                 |

Table 6: (continued)

|     | Conjunction | Drivers | Tree | S.Size | Model | sh  | S.Time | S.Type      | Best method(s)                                                                                                         |
|-----|-------------|---------|------|--------|-------|-----|--------|-------------|------------------------------------------------------------------------------------------------------------------------|
| 560 | No          | 11      | 11-B | 100    | McF_4 | Inf | last   | wholeT_0.01 | J5:OT, J5:OT-A, S5:OT, S5:OT-A                                                                                         |
| 561 | No          | 11      | 11-B | 100    | McF_4 | Inf | last   | wholeT_0.5  | J5:OT, J5:OT-A, S5:OT, S5:OT-A                                                                                         |
| 562 | No          | 11      | 11-B | 100    | McF_4 | Inf | unif   | singleC     | J1:OT, J1:OT-A, S5:CBN-A, S5:OT, S5:OT-A                                                                               |
| 563 | No          | 11      | 11-B | 100    | McF_4 | Inf | unif   | wholeT_0.01 | J5:OT, J5:OT-A, S5:OT, S5:OT-A                                                                                         |
| 564 | No          | 11      | 11-B | 100    | McF_4 | Inf | unif   | wholeT_0.5  | J5:OT, J5:OT-A, S5:OT, S5:OT-A                                                                                         |
| 565 | No          | 11      | 11-B | 100    | McF_6 | 0   | last   | singleC     | J1:OT, J5:OT, S5:OT                                                                                                    |
| 566 | No          | 11      | 11-B | 100    | McF_6 | 0   | last   | wholeT_0.01 | J1:DiP, J5:DiP, J5:OT, S1:DiP, S5:DiP, S5:OT                                                                           |
| 567 | No          | 11      | 11-B | 100    | McF_6 | 0   | last   | wholeT_0.5  | J1:OT, J5:OT, S5:OT                                                                                                    |
| 568 | No          | 11      | 11-B | 100    | McF_6 | 0   | unif   | singleC     | J1:CBN, J1:CBN-A, J5:CBN, J5:CBN-A, J5:OT, J5:OT-A                                                                     |
| 569 | No          | 11      | 11-B | 100    | McF_6 | 0   | unif   | wholeT_0.01 | J1:DiP, J1:DiP-A, J5:CBN-A, J5:DiP, J5:DiP-A, J5:OT, J5:OT-A, S1:DiP, S5:DiP, S5:DiP-A, S5:OT, S5:OT-A                 |
| 570 | No          | 11      | 11-B | 100    | McF_6 | 0   | unif   | wholeT_0.5  | J1:CBN, J1:CBN-A, J1:OT, J1:OT-A, J5:CBN, J5:CBN-A, J5:OT, J5:OT-A, S5:CBN, S5:CBN-A, S5:OT, S5:OT-A                   |
| 571 | No          | 11      | 11-B | 100    | McF_6 | Inf | last   | singleC     | J5:OT, S5:OT                                                                                                           |
| 572 | No          | 11      | 11-B | 100    | McF_6 | Inf | last   | wholeT_0.01 | J5:OT, S5:OT                                                                                                           |
| 573 | No          | 11      | 11-B | 100    | McF_6 | Inf | last   | wholeT_0.5  | J1:OT, J5:OT, S5:OT                                                                                                    |
| 574 | No          | 11      | 11-B | 100    | McF_6 | Inf | unif   | singleC     | J5:CBN-A, J5:OT, J5:OT-A, S5:CBN                                                                                       |
| 575 | No          | 11      | 11-B | 100    | McF_6 | Inf | unif   | wholeT_0.01 | J5:CBN-A, J5:OT, J5:OT-A, S5:CBN, S5:CBN-A, S5:OT, S5:OT-A                                                             |
| 576 | No          | 11      | 11-B | 100    | McF_6 | Inf | unif   | wholeT_0.5  | J1:CBN-A, J5:CBN-A, J5:OT, J5:OT-A, S5:OT                                                                              |
| 577 | No          | 9       | 9-B  | 1000   | Bozic | 0   | last   | singleC     | S1:OT, S1:OT-A                                                                                                         |
| 578 | No          | 9       | 9-B  | 1000   | Bozic | 0   | last   | wholeT_0.01 | S1:CBN-A, S1:DiP, S1:DiP-A, S1:OT, S1:OT-A, S5:CBN-A, S5:DiP, S5:DiP-A, S5:OT, S5:OT-A                                 |
| 579 | No          | 9       | 9-B  | 1000   | Bozic | 0   | last   | wholeT_0.5  | S1:OT, S1:OT-A                                                                                                         |
| 580 | No          | 9       | 9-B  | 1000   | Bozic | 0   | unif   | singleC     | S1:CBN, S1:CBN-A, S5:CBN, S5:CBN-A                                                                                     |
| 581 | No          | 9       | 9-B  | 1000   | Bozic | 0   | unif   | wholeT_0.01 | J1:DiP, J1:DiP-A, J1:OT, J1:OT-A, S1:DiP, S1:DiP-A, S1:OT, S1:OT-A                                                     |
| 582 | No          | 9       | 9-B  | 1000   | Bozic | 0   | unif   | wholeT_0.5  | S1:CBN, S1:CBN-A, S5:CBN, S5:CBN-A                                                                                     |
| 583 | No          | 9       | 9-B  | 1000   | Bozic | Inf | last   | singleC     | J1:DiP, J1:DiP-A, J1:OT, J1:OT-A, J5:DiP, J5:DiP-A, J5:OT, J5:OT-A, S1:DiP, S1:DiP-A, S5:DiP, S5:DiP-A, S5:OT, S5:OT-A |
| 584 | No          | 9       | 9-B  | 1000   | Bozic | Inf | last   | wholeT_0.01 | J5:DiP, J5:DiP-A                                                                                                       |



Table 6: (continued)

|     | Conjunction | Drivers | Tree | S.Size | Model | sh  | S.Time | S.Type      | Best method(s)                                                                                                                                             |
|-----|-------------|---------|------|--------|-------|-----|--------|-------------|------------------------------------------------------------------------------------------------------------------------------------------------------------|
| 585 | No          | 9       | 9-B  | 1000   | Bozic | Inf | last   | wholeT_0.5  | J1:DiP, J1:DiP-A, J1:OT, J1:OT-A,<br>J5:DiP, J5:DiP-A, J5:OT, J5:OT-A,<br>S1:DiP, S1:DiP-A, S5:DiP, S5:DiP-A,<br>S5:OT, S5:OT-A                            |
| 586 | No          | 9       | 9-B  | 1000   | Bozic | Inf | unif   | singleC     | S1:CBN, S1:CBN-A, S1:DiP, S1:DiP-A,<br>S1:OT, S1:OT-A                                                                                                      |
| 587 | No          | 9       | 9-B  | 1000   | Bozic | Inf | unif   | wholeT_0.01 | J1:CBN-A, S5:CBN, S5:CBN-A, S5:DiP,<br>S5:DiP-A, S5:OT, S5:OT-A                                                                                            |
| 588 | No          | 9       | 9-B  | 1000   | Bozic | Inf | unif   | wholeT_0.5  | S1:CBN, S1:CBN-A, S1:DiP-A, S1:OT,<br>S1:OT-A                                                                                                              |
| 589 | No          | 9       | 9-B  | 1000   | exp   | 0   | last   | singleC     | J1:CBN, J1:CBN-A, S1:CBN, S1:CBN-A,<br>S5:CBN, S5:CBN-A                                                                                                    |
| 590 | No          | 9       | 9-B  | 1000   | exp   | 0   | last   | wholeT_0.01 | S1:DiP-A, S1:OT, S1:OT-A                                                                                                                                   |
| 591 | No          | 9       | 9-B  | 1000   | exp   | 0   | last   | wholeT_0.5  | J1:CBN, J1:CBN-A, S1:CBN, S1:CBN-A,<br>S5:CBN, S5:CBN-A                                                                                                    |
| 592 | No          | 9       | 9-B  | 1000   | exp   | 0   | unif   | singleC     | S1:CBN, S1:CBN-A, S5:CBN, S5:CBN-A                                                                                                                         |
| 593 | No          | 9       | 9-B  | 1000   | exp   | 0   | unif   | wholeT_0.01 | J1:CBN, J1:CBN-A, S1:CBN, S1:CBN-A,<br>S5:CBN, S5:CBN-A                                                                                                    |
| 594 | No          | 9       | 9-B  | 1000   | exp   | 0   | unif   | wholeT_0.5  | S1:CBN, S1:CBN-A, S5:CBN, S5:CBN-A                                                                                                                         |
| 595 | No          | 9       | 9-B  | 1000   | exp   | Inf | last   | singleC     | J1:DiP, J1:DiP-A, J1:OT, J1:OT-A,<br>S1:DiP-A, S5:DiP, S5:DiP-A, S5:OT,<br>S5:OT-A                                                                         |
| 596 | No          | 9       | 9-B  | 1000   | exp   | Inf | last   | wholeT_0.01 | J5:DiP, J5:DiP-A                                                                                                                                           |
| 597 | No          | 9       | 9-B  | 1000   | exp   | Inf | last   | wholeT_0.5  | J1:DiP, J1:DiP-A, J1:OT, J1:OT-A,<br>S1:DiP, S1:DiP-A, S5:DiP, S5:DiP-A,<br>S5:OT, S5:OT-A                                                                 |
| 598 | No          | 9       | 9-B  | 1000   | exp   | Inf | unif   | singleC     | S1:OT, S1:OT-A                                                                                                                                             |
| 599 | No          | 9       | 9-B  | 1000   | exp   | Inf | unif   | wholeT_0.01 | J1:OT, J1:OT-A                                                                                                                                             |
| 600 | No          | 9       | 9-B  | 1000   | exp   | Inf | unif   | wholeT_0.5  | S1:OT, S1:OT-A                                                                                                                                             |
| 601 | No          | 9       | 9-B  | 1000   | McF_4 | 0   | last   | singleC     | J1:DiP, J1:DiP-A, J1:OT, J1:OT-A,<br>J5:CBN, J5:DiP, J5:DiP-A, J5:OT,<br>J5:OT-A, S1:DiP, S1:DiP-A, S1:OT,<br>S1:OT-A, S5:DiP, S5:DiP-A, S5:OT,<br>S5:OT-A |
| 602 | No          | 9       | 9-B  | 1000   | McF_4 | 0   | last   | wholeT_0.01 | J1:DiP, J1:DiP-A, J1:OT, J1:OT-A,<br>J5:CBN, J5:DiP, J5:DiP-A, J5:OT,<br>J5:OT-A, S1:DiP, S1:DiP-A, S5:DiP,<br>S5:DiP-A, S5:OT, S5:OT-A                    |

Table 6: (continued)

|     | Conjunction | Drivers | Tree | S.Size | Model | sh  | S.Time | S.Type      | Best method(s)                                                                                                                         |
|-----|-------------|---------|------|--------|-------|-----|--------|-------------|----------------------------------------------------------------------------------------------------------------------------------------|
| 603 | No          | 9       | 9-B  | 1000   | McF_4 | 0   | last   | wholeT_0.5  | J1:DiP, J1:DiP-A, J1:OT, J1:OT-A, J5:CBN, J5:DiP, J5:DiP-A, J5:OT, J5:OT-A, S1:DiP-A, S1:OT, S1:OT-A, S5:DiP, S5:DiP-A, S5:OT, S5:OT-A |
| 604 | No          | 9       | 9-B  | 1000   | McF_4 | 0   | unif   | singleC     | J1:DiP, J1:DiP-A, J1:OT, J1:OT-A, S1:DiP, S1:DiP-A, S1:OT, S1:OT-A, S5:DiP, S5:DiP-A, S5:OT, S5:OT-A                                   |
| 605 | No          | 9       | 9-B  | 1000   | McF_4 | 0   | unif   | wholeT_0.01 | J1:DiP, J1:DiP-A, J1:OT, J1:OT-A, S1:DiP-A, S5:DiP, S5:DiP-A, S5:OT, S5:OT-A                                                           |
| 606 | No          | 9       | 9-B  | 1000   | McF_4 | 0   | unif   | wholeT_0.5  | J1:DiP, J1:DiP-A, J1:OT, J1:OT-A, S1:DiP, S1:DiP-A, S1:OT, S1:OT-A, S5:DiP, S5:DiP-A, S5:OT, S5:OT-A                                   |
| 607 | No          | 9       | 9-B  | 1000   | McF_4 | Inf | last   | singleC     | J1:DiP, J1:DiP-A, J1:OT, J1:OT-A, J5:DiP, J5:DiP-A, J5:OT, J5:OT-A, S1:OT, S1:OT-A, S5:DiP, S5:DiP-A, S5:OT, S5:OT-A                   |
| 608 | No          | 9       | 9-B  | 1000   | McF_4 | Inf | last   | wholeT_0.01 | J1:DiP, J1:DiP-A, J1:OT, J1:OT-A, J5:DiP, J5:DiP-A, J5:OT, J5:OT-A, S1:DiP, S1:DiP-A, S5:DiP, S5:DiP-A, S5:OT, S5:OT-A                 |
| 609 | No          | 9       | 9-B  | 1000   | McF_4 | Inf | last   | wholeT_0.5  | J1:DiP, J1:DiP-A, J1:OT, J1:OT-A, J5:DiP, J5:DiP-A, J5:OT, J5:OT-A, S1:DiP, S1:DiP-A, S1:OT, S1:OT-A, S5:DiP, S5:DiP-A, S5:OT, S5:OT-A |
| 610 | No          | 9       | 9-B  | 1000   | McF_4 | Inf | unif   | singleC     | J1:DiP, J1:DiP-A, J1:OT, J1:OT-A, S1:DiP, S1:DiP-A, S1:OT, S1:OT-A, S5:DiP, S5:DiP-A, S5:OT, S5:OT-A                                   |
| 611 | No          | 9       | 9-B  | 1000   | McF_4 | Inf | unif   | wholeT_0.01 | J1:DiP, J1:DiP-A, J1:OT, J1:OT-A, S1:DiP-A, S5:DiP, S5:DiP-A, S5:OT, S5:OT-A                                                           |
| 612 | No          | 9       | 9-B  | 1000   | McF_4 | Inf | unif   | wholeT_0.5  | J1:DiP, J1:DiP-A, J1:OT, J1:OT-A, S1:DiP, S1:DiP-A, S1:OT, S1:OT-A, S5:DiP, S5:DiP-A, S5:OT, S5:OT-A                                   |
| 613 | No          | 9       | 9-B  | 1000   | McF_6 | 0   | last   | singleC     | J1:DiP, J1:OT, J5:DiP, J5:OT, S1:DiP, S5:DiP, S5:OT                                                                                    |
| 614 | No          | 9       | 9-B  | 1000   | McF_6 | 0   | last   | wholeT_0.01 | J1:DiP, J1:OT, J5:DiP, J5:OT, S1:DiP, S5:DiP, S5:OT                                                                                    |
| 615 | No          | 9       | 9-B  | 1000   | McF_6 | 0   | last   | wholeT_0.5  | J1:DiP, J1:OT, J5:DiP, J5:OT, S1:DiP, S1:OT, S5:DiP, S5:OT                                                                             |

Table 6: (continued)

|     | Conjunction | Drivers | Tree | S.Size | Model | sh  | S.Time | S.Type      | Best method(s)                                                                                                                                                                               |
|-----|-------------|---------|------|--------|-------|-----|--------|-------------|----------------------------------------------------------------------------------------------------------------------------------------------------------------------------------------------|
| 616 | No          | 9       | 9-B  | 1000   | McF_6 | 0   | unif   | singleC     | J1:CBN, J1:CBN-A, J1:DiP, J1:DiP-A, J1:OT, J1:OT-A, J5:CBN, J5:CBN-A, J5:DiP, J5:DiP-A, J5:OT, J5:OT-A, S1:DiP, S1:DiP-A, S1:OT, S1:OT-A, S5:CBN, S5:CBN-A, S5:DiP, S5:DiP-A, S5:OT, S5:OT-A |
| 617 | No          | 9       | 9-B  | 1000   | McF_6 | 0   | unif   | wholeT_0.01 | J1:CBN, J1:CBN-A, J1:DiP, J1:DiP-A, J1:OT, J1:OT-A, J5:CBN, J5:CBN-A, J5:DiP, J5:DiP-A, J5:OT, J5:OT-A, S1:DiP, S1:DiP-A, S5:CBN, S5:DiP, S5:DiP-A, S5:OT, S5:OT-A                           |
| 618 | No          | 9       | 9-B  | 1000   | McF_6 | 0   | unif   | wholeT_0.5  | J1:CBN, J1:CBN-A, J1:DiP, J1:DiP-A, J1:OT, J1:OT-A, J5:CBN, J5:CBN-A, J5:DiP, J5:DiP-A, J5:OT, J5:OT-A, S1:DiP, S1:DiP-A, S1:OT, S1:OT-A, S5:CBN, S5:CBN-A, S5:DiP, S5:DiP-A, S5:OT, S5:OT-A |
| 619 | No          | 9       | 9-B  | 1000   | McF_6 | Inf | last   | singleC     | J1:DiP, J1:OT, J5:DiP, J5:OT, S1:DiP, S5:DiP, S5:OT                                                                                                                                          |
| 620 | No          | 9       | 9-B  | 1000   | McF_6 | Inf | last   | wholeT_0.01 | J1:DiP, J1:OT, J5:DiP, J5:OT, S1:DiP, S5:DiP, S5:OT                                                                                                                                          |
| 621 | No          | 9       | 9-B  | 1000   | McF_6 | Inf | last   | wholeT_0.5  | J1:DiP, J1:OT, J5:DiP, J5:OT, S1:DiP, S1:OT, S5:DiP, S5:OT                                                                                                                                   |
| 622 | No          | 9       | 9-B  | 1000   | McF_6 | Inf | unif   | singleC     | J1:CBN, J1:CBN-A, J1:DiP, J1:DiP-A, J1:OT, J1:OT-A, J5:CBN-A, J5:DiP, J5:DiP-A, J5:OT, J5:OT-A, S1:DiP, S1:DiP-A, S1:OT, S1:OT-A, S5:CBN, S5:CBN-A, S5:DiP, S5:DiP-A, S5:OT, S5:OT-A         |
| 623 | No          | 9       | 9-B  | 1000   | McF_6 | Inf | unif   | wholeT_0.01 | J1:CBN, J1:CBN-A, J1:DiP, J1:DiP-A, J1:OT, J1:OT-A, J5:CBN-A, J5:DiP, J5:DiP-A, J5:OT, J5:OT-A, S1:DiP, S5:CBN, S5:DiP, S5:DiP-A, S5:OT, S5:OT-A                                             |
| 624 | No          | 9       | 9-B  | 1000   | McF_6 | Inf | unif   | wholeT_0.5  | J1:CBN, J1:CBN-A, J1:DiP, J1:DiP-A, J1:OT, J1:OT-A, J5:CBN-A, J5:DiP, J5:DiP-A, J5:OT, J5:OT-A, S1:DiP, S1:DiP-A, S1:OT, S1:OT-A, S5:CBN, S5:CBN-A, S5:DiP, S5:DiP-A, S5:OT, S5:OT-A         |

Table 6: (continued)

|     | Conjunction | Drivers | Tree | S.Size | Model | sh  | S.Time | S.Type      | Best method(s)                                                                                                                  |
|-----|-------------|---------|------|--------|-------|-----|--------|-------------|---------------------------------------------------------------------------------------------------------------------------------|
| 625 | No          | 9       | 9-B  | 200    | Bozic | 0   | last   | singleC     | S1:OT, S1:OT-A                                                                                                                  |
| 626 | No          | 9       | 9-B  | 200    | Bozic | 0   | last   | wholeT_0.01 | S5:OT, S5:OT-A                                                                                                                  |
| 627 | No          | 9       | 9-B  | 200    | Bozic | 0   | last   | wholeT_0.5  | S1:OT, S1:OT-A                                                                                                                  |
| 628 | No          | 9       | 9-B  | 200    | Bozic | 0   | unif   | singleC     | S1:CBN, S1:CBN-A                                                                                                                |
| 629 | No          | 9       | 9-B  | 200    | Bozic | 0   | unif   | wholeT_0.01 | S1:DiP, S1:DiP-A                                                                                                                |
| 630 | No          | 9       | 9-B  | 200    | Bozic | 0   | unif   | wholeT_0.5  | S1:CBN, S1:CBN-A, S5:CBN, S5:CBN-A                                                                                              |
| 631 | No          | 9       | 9-B  | 200    | Bozic | Inf | last   | singleC     | J1:OT, J1:OT-A, S5:OT, S5:OT-A                                                                                                  |
| 632 | No          | 9       | 9-B  | 200    | Bozic | Inf | last   | wholeT_0.01 | J5:CBN-A, J5:OT, J5:OT-A                                                                                                        |
| 633 | No          | 9       | 9-B  | 200    | Bozic | Inf | last   | wholeT_0.5  | J1:OT, J1:OT-A, J5:OT, J5:OT-A,<br>S5:OT, S5:OT-A                                                                               |
| 634 | No          | 9       | 9-B  | 200    | Bozic | Inf | unif   | singleC     | J1:CBN, J1:CBN-A, S1:OT, S1:OT-A                                                                                                |
| 635 | No          | 9       | 9-B  | 200    | Bozic | Inf | unif   | wholeT_0.01 | S5:CBN-A, S5:OT, S5:OT-A                                                                                                        |
| 636 | No          | 9       | 9-B  | 200    | Bozic | Inf | unif   | wholeT_0.5  | S1:OT, S1:OT-A                                                                                                                  |
| 637 | No          | 9       | 9-B  | 200    | exp   | 0   | last   | singleC     | S1:OT, S1:OT-A                                                                                                                  |
| 638 | No          | 9       | 9-B  | 200    | exp   | 0   | last   | wholeT_0.01 | S1:OT, S1:OT-A                                                                                                                  |
| 639 | No          | 9       | 9-B  | 200    | exp   | 0   | last   | wholeT_0.5  | S1:CBN, S1:CBN-A                                                                                                                |
| 640 | No          | 9       | 9-B  | 200    | exp   | 0   | unif   | singleC     | S1:CBN, S1:CBN-A, S5:CBN, S5:CBN-A                                                                                              |
| 641 | No          | 9       | 9-B  | 200    | exp   | 0   | unif   | wholeT_0.01 | S1:CBN, S1:CBN-A                                                                                                                |
| 642 | No          | 9       | 9-B  | 200    | exp   | 0   | unif   | wholeT_0.5  | S1:CBN, S1:CBN-A, S5:CBN, S5:CBN-A                                                                                              |
| 643 | No          | 9       | 9-B  | 200    | exp   | Inf | last   | singleC     | J1:OT, J1:OT-A, S5:OT, S5:OT-A                                                                                                  |
| 644 | No          | 9       | 9-B  | 200    | exp   | Inf | last   | wholeT_0.01 | J5:CBN-A, J5:OT, J5:OT-A                                                                                                        |
| 645 | No          | 9       | 9-B  | 200    | exp   | Inf | last   | wholeT_0.5  | J1:OT, J1:OT-A, S5:OT, S5:OT-A                                                                                                  |
| 646 | No          | 9       | 9-B  | 200    | exp   | Inf | unif   | singleC     | S1:OT, S1:OT-A                                                                                                                  |
| 647 | No          | 9       | 9-B  | 200    | exp   | Inf | unif   | wholeT_0.01 | J1:CBN-A, J1:OT, J1:OT-A, S5:CBN,<br>S5:CBN-A                                                                                   |
| 648 | No          | 9       | 9-B  | 200    | exp   | Inf | unif   | wholeT_0.5  | S1:OT, S1:OT-A                                                                                                                  |
| 649 | No          | 9       | 9-B  | 200    | McF_4 | 0   | last   | singleC     | J1:OT, J1:OT-A, J5:OT, J5:OT-A,<br>S5:DiP-A, S5:OT, S5:OT-A                                                                     |
| 650 | No          | 9       | 9-B  | 200    | McF_4 | 0   | last   | wholeT_0.01 | J1:DiP, J1:DiP-A, J1:OT, J1:OT-A,<br>J5:DiP, J5:DiP-A, J5:OT, J5:OT-A,<br>S1:DiP, S1:DiP-A, S5:DiP, S5:DiP-A,<br>S5:OT, S5:OT-A |
| 651 | No          | 9       | 9-B  | 200    | McF_4 | 0   | last   | wholeT_0.5  | J1:OT, J1:OT-A, J5:DiP-A, J5:OT,<br>J5:OT-A, S1:DiP-A, S5:DiP, S5:DiP-A,<br>S5:OT, S5:OT-A                                      |
| 652 | No          | 9       | 9-B  | 200    | McF_4 | 0   | unif   | singleC     | J1:OT, J1:OT-A, S5:OT, S5:OT-A                                                                                                  |
| 653 | No          | 9       | 9-B  | 200    | McF_4 | 0   | unif   | wholeT_0.01 | J1:DiP, J1:DiP-A, J1:OT, J1:OT-A,<br>S1:DiP, S1:DiP-A, S5:DiP, S5:DiP-A,<br>S5:OT, S5:OT-A                                      |
| 654 | No          | 9       | 9-B  | 200    | McF_4 | 0   | unif   | wholeT_0.5  | J1:OT, J1:OT-A, S5:OT, S5:OT-A                                                                                                  |

Table 6: (continued)

|     | Conjunction | Drivers | Tree | S.Size | Model | sh  | S.Time | S.Type      | Best method(s)                                                                                                                                                       |
|-----|-------------|---------|------|--------|-------|-----|--------|-------------|----------------------------------------------------------------------------------------------------------------------------------------------------------------------|
| 655 | No          | 9       | 9-B  | 200    | McF_4 | Inf | last   | singleC     | J1:OT, J1:OT-A, J5:OT, J5:OT-A, S5:OT, S5:OT-A                                                                                                                       |
| 656 | No          | 9       | 9-B  | 200    | McF_4 | Inf | last   | wholeT_0.01 | J1:DiP-A, J1:OT, J1:OT-A, J5:OT, J5:OT-A, S5:DiP-A, S5:OT, S5:OT-A                                                                                                   |
| 657 | No          | 9       | 9-B  | 200    | McF_4 | Inf | last   | wholeT_0.5  | J1:OT, J1:OT-A, J5:OT, J5:OT-A, S1:DiP-A, S5:DiP-A, S5:OT, S5:OT-A                                                                                                   |
| 658 | No          | 9       | 9-B  | 200    | McF_4 | Inf | unif   | singleC     | J1:OT, J1:OT-A, S5:OT, S5:OT-A                                                                                                                                       |
| 659 | No          | 9       | 9-B  | 200    | McF_4 | Inf | unif   | wholeT_0.01 | J1:OT, J1:OT-A, S5:OT, S5:OT-A                                                                                                                                       |
| 660 | No          | 9       | 9-B  | 200    | McF_4 | Inf | unif   | wholeT_0.5  | J1:OT, J1:OT-A, S5:OT, S5:OT-A                                                                                                                                       |
| 661 | No          | 9       | 9-B  | 200    | McF_6 | 0   | last   | singleC     | J1:DiP, J1:OT, J5:OT, S1:DiP, S5:DiP, S5:OT                                                                                                                          |
| 662 | No          | 9       | 9-B  | 200    | McF_6 | 0   | last   | wholeT_0.01 | J1:DiP, J1:OT, J5:DiP, J5:OT, S1:DiP, S5:DiP, S5:OT                                                                                                                  |
| 663 | No          | 9       | 9-B  | 200    | McF_6 | 0   | last   | wholeT_0.5  | J1:OT, J5:OT, S1:DiP, S5:DiP, S5:OT                                                                                                                                  |
| 664 | No          | 9       | 9-B  | 200    | McF_6 | 0   | unif   | singleC     | J1:CBN, J1:CBN-A, J1:DiP-A, J1:OT, J1:OT-A, J5:CBN, J5:CBN-A, J5:OT, J5:OT-A, S1:DiP, S5:CBN, S5:CBN-A, S5:DiP, S5:DiP-A, S5:OT, S5:OT-A                             |
| 665 | No          | 9       | 9-B  | 200    | McF_6 | 0   | unif   | wholeT_0.01 | J1:CBN, J1:CBN-A, J1:DiP, J1:DiP-A, J1:OT, J1:OT-A, J5:CBN, J5:CBN-A, J5:DiP, J5:DiP-A, J5:OT, J5:OT-A, S1:DiP, S1:DiP-A, S5:CBN-A, S5:DiP, S5:DiP-A, S5:OT, S5:OT-A |
| 666 | No          | 9       | 9-B  | 200    | McF_6 | 0   | unif   | wholeT_0.5  | J1:CBN, J1:CBN-A, J1:DiP-A, J1:OT, J1:OT-A, J5:CBN-A, J5:DiP-A, J5:OT, J5:OT-A, S1:DiP, S5:CBN-A, S5:DiP, S5:DiP-A, S5:OT, S5:OT-A                                   |
| 667 | No          | 9       | 9-B  | 200    | McF_6 | Inf | last   | singleC     | J1:OT, J5:OT, S1:DiP, S5:DiP, S5:OT                                                                                                                                  |
| 668 | No          | 9       | 9-B  | 200    | McF_6 | Inf | last   | wholeT_0.01 | J1:OT, J5:OT, S1:DiP, S5:DiP, S5:OT                                                                                                                                  |
| 669 | No          | 9       | 9-B  | 200    | McF_6 | Inf | last   | wholeT_0.5  | J1:OT, J5:OT, S1:DiP, S5:DiP, S5:OT                                                                                                                                  |
| 670 | No          | 9       | 9-B  | 200    | McF_6 | Inf | unif   | singleC     | J1:CBN, J1:CBN-A, J1:OT, J1:OT-A, J5:CBN-A, J5:OT, J5:OT-A, S5:CBN, S5:OT, S5:OT-A                                                                                   |
| 671 | No          | 9       | 9-B  | 200    | McF_6 | Inf | unif   | wholeT_0.01 | J1:CBN, J1:CBN-A, J1:OT, J1:OT-A, J5:CBN-A, J5:OT, J5:OT-A, S5:CBN, S5:OT, S5:OT-A                                                                                   |
| 672 | No          | 9       | 9-B  | 200    | McF_6 | Inf | unif   | wholeT_0.5  | J1:CBN, J1:CBN-A, J1:DiP-A, J1:OT, J1:OT-A, J5:CBN-A, J5:OT, J5:OT-A, S5:CBN, S5:CBN-A, S5:DiP-A, S5:OT, S5:OT-A                                                     |

Table 6: (continued)

|     | Conjunction | Drivers | Tree | S.Size | Model | sh  | S.Time | S.Type      | Best method(s)                                                                             |
|-----|-------------|---------|------|--------|-------|-----|--------|-------------|--------------------------------------------------------------------------------------------|
| 673 | No          | 9       | 9-B  | 100    | Bozic | 0   | last   | singleC     | S1:OT, S1:OT-A                                                                             |
| 674 | No          | 9       | 9-B  | 100    | Bozic | 0   | last   | wholeT_0.01 | S5:OT, S5:OT-A                                                                             |
| 675 | No          | 9       | 9-B  | 100    | Bozic | 0   | last   | wholeT_0.5  | S1:OT, S1:OT-A                                                                             |
| 676 | No          | 9       | 9-B  | 100    | Bozic | 0   | unif   | singleC     | S1:OT, S1:OT-A                                                                             |
| 677 | No          | 9       | 9-B  | 100    | Bozic | 0   | unif   | wholeT_0.01 | J1:OT, J1:OT-A                                                                             |
| 678 | No          | 9       | 9-B  | 100    | Bozic | 0   | unif   | wholeT_0.5  | J1:CBN, J1:CBN-A, S1:CBN, S1:CBN-A                                                         |
| 679 | No          | 9       | 9-B  | 100    | Bozic | Inf | last   | singleC     | J5:OT, J5:OT-A                                                                             |
| 680 | No          | 9       | 9-B  | 100    | Bozic | Inf | last   | wholeT_0.01 | J5:OT, J5:OT-A                                                                             |
| 681 | No          | 9       | 9-B  | 100    | Bozic | Inf | last   | wholeT_0.5  | J5:OT, J5:OT-A                                                                             |
| 682 | No          | 9       | 9-B  | 100    | Bozic | Inf | unif   | singleC     | J1:CBN, J1:CBN-A, J1:OT, J1:OT-A,<br>S1:OT, S1:OT-A, S5:CBN, S5:CBN-A                      |
| 683 | No          | 9       | 9-B  | 100    | Bozic | Inf | unif   | wholeT_0.01 | J5:CBN, J5:CBN-A, S5:CBN, S5:OT,<br>S5:OT-A                                                |
| 684 | No          | 9       | 9-B  | 100    | Bozic | Inf | unif   | wholeT_0.5  | J1:CBN, J1:CBN-A, J1:OT, J1:OT-A,<br>S1:OT, S1:OT-A, S5:CBN-A                              |
| 685 | No          | 9       | 9-B  | 100    | exp   | 0   | last   | singleC     | S1:OT, S1:OT-A                                                                             |
| 686 | No          | 9       | 9-B  | 100    | exp   | 0   | last   | wholeT_0.01 | S5:OT, S5:OT-A                                                                             |
| 687 | No          | 9       | 9-B  | 100    | exp   | 0   | last   | wholeT_0.5  | S1:OT, S1:OT-A                                                                             |
| 688 | No          | 9       | 9-B  | 100    | exp   | 0   | unif   | singleC     | J1:CBN, J1:CBN-A, S1:CBN, S1:CBN-A,<br>S5:CBN, S5:CBN-A                                    |
| 689 | No          | 9       | 9-B  | 100    | exp   | 0   | unif   | wholeT_0.01 | S1:OT, S1:OT-A                                                                             |
| 690 | No          | 9       | 9-B  | 100    | exp   | 0   | unif   | wholeT_0.5  | S1:CBN, S1:CBN-A, S5:CBN, S5:CBN-A                                                         |
| 691 | No          | 9       | 9-B  | 100    | exp   | Inf | last   | singleC     | S5:OT, S5:OT-A                                                                             |
| 692 | No          | 9       | 9-B  | 100    | exp   | Inf | last   | wholeT_0.01 | J5:CBN-A, J5:OT, J5:OT-A                                                                   |
| 693 | No          | 9       | 9-B  | 100    | exp   | Inf | last   | wholeT_0.5  | S5:OT, S5:OT-A                                                                             |
| 694 | No          | 9       | 9-B  | 100    | exp   | Inf | unif   | singleC     | S1:OT, S1:OT-A                                                                             |
| 695 | No          | 9       | 9-B  | 100    | exp   | Inf | unif   | wholeT_0.01 | J1:OT, J1:OT-A, S1:OT, S1:OT-A,<br>S5:CBN, S5:CBN-A                                        |
| 696 | No          | 9       | 9-B  | 100    | exp   | Inf | unif   | wholeT_0.5  | S1:OT, S1:OT-A                                                                             |
| 697 | No          | 9       | 9-B  | 100    | McF_4 | 0   | last   | singleC     | J1:OT, J1:OT-A, J5:OT, J5:OT-A,<br>S5:OT, S5:OT-A                                          |
| 698 | No          | 9       | 9-B  | 100    | McF_4 | 0   | last   | wholeT_0.01 | J1:DiP, J1:DiP-A, J5:OT, J5:OT-A,<br>S1:DiP, S1:DiP-A, S5:DiP, S5:DiP-A,<br>S5:OT, S5:OT-A |
| 699 | No          | 9       | 9-B  | 100    | McF_4 | 0   | last   | wholeT_0.5  | J1:OT, J1:OT-A, J5:OT, J5:OT-A,<br>S5:OT, S5:OT-A                                          |
| 700 | No          | 9       | 9-B  | 100    | McF_4 | 0   | unif   | singleC     | J1:OT, J1:OT-A, S5:OT, S5:OT-A                                                             |
| 701 | No          | 9       | 9-B  | 100    | McF_4 | 0   | unif   | wholeT_0.01 | S1:DiP, S1:DiP-A, S5:DiP-A, S5:OT,<br>S5:OT-A                                              |
| 702 | No          | 9       | 9-B  | 100    | McF_4 | 0   | unif   | wholeT_0.5  | J1:OT, J1:OT-A, S5:OT, S5:OT-A                                                             |

Table 6: (continued)

|     | Conjunction | Drivers | Tree | S.Size | Model | sh  | S.Time | S.Type      | Best method(s)                                                                                                                  |
|-----|-------------|---------|------|--------|-------|-----|--------|-------------|---------------------------------------------------------------------------------------------------------------------------------|
| 703 | No          | 9       | 9-B  | 100    | McF_4 | Inf | last   | singleC     | J1:OT, J1:OT-A, J5:OT, J5:OT-A, S5:OT, S5:OT-A                                                                                  |
| 704 | No          | 9       | 9-B  | 100    | McF_4 | Inf | last   | wholeT_0.01 | J5:OT, J5:OT-A, S5:OT, S5:OT-A                                                                                                  |
| 705 | No          | 9       | 9-B  | 100    | McF_4 | Inf | last   | wholeT_0.5  | J1:OT, J1:OT-A, J5:OT, J5:OT-A, S5:OT, S5:OT-A                                                                                  |
| 706 | No          | 9       | 9-B  | 100    | McF_4 | Inf | unif   | singleC     | J1:OT, J1:OT-A, S5:OT, S5:OT-A                                                                                                  |
| 707 | No          | 9       | 9-B  | 100    | McF_4 | Inf | unif   | wholeT_0.01 | S5:OT, S5:OT-A                                                                                                                  |
| 708 | No          | 9       | 9-B  | 100    | McF_4 | Inf | unif   | wholeT_0.5  | J1:OT, J1:OT-A, S5:OT, S5:OT-A                                                                                                  |
| 709 | No          | 9       | 9-B  | 100    | McF_6 | 0   | last   | singleC     | J1:OT, J5:OT, S5:OT                                                                                                             |
| 710 | No          | 9       | 9-B  | 100    | McF_6 | 0   | last   | wholeT_0.01 | J1:DiP, J5:OT, S1:DiP, S5:OT                                                                                                    |
| 711 | No          | 9       | 9-B  | 100    | McF_6 | 0   | last   | wholeT_0.5  | J1:OT, J5:OT, S5:OT                                                                                                             |
| 712 | No          | 9       | 9-B  | 100    | McF_6 | 0   | unif   | singleC     | J1:CBN, J1:CBN-A, J1:OT, J1:OT-A, J5:CBN-A, J5:OT, J5:OT-A, S5:CBN-A, S5:OT, S5:OT-A                                            |
| 713 | No          | 9       | 9-B  | 100    | McF_6 | 0   | unif   | wholeT_0.01 | J1:CBN, J1:CBN-A, J1:DiP, J1:DiP-A, J1:OT, J5:CBN-A, J5:OT, J5:OT-A, S1:DiP, S1:DiP-A, S5:CBN, S5:DiP, S5:DiP-A, S5:OT, S5:OT-A |
| 714 | No          | 9       | 9-B  | 100    | McF_6 | 0   | unif   | wholeT_0.5  | J1:CBN, J1:CBN-A, J1:OT, J1:OT-A, J5:CBN-A, J5:OT, J5:OT-A, S5:CBN, S5:CBN-A, S5:OT, S5:OT-A                                    |
| 715 | No          | 9       | 9-B  | 100    | McF_6 | Inf | last   | singleC     | J1:OT, J5:OT, S5:OT                                                                                                             |
| 716 | No          | 9       | 9-B  | 100    | McF_6 | Inf | last   | wholeT_0.01 | J5:OT, S5:OT                                                                                                                    |
| 717 | No          | 9       | 9-B  | 100    | McF_6 | Inf | last   | wholeT_0.5  | J1:OT, J5:OT, S5:OT                                                                                                             |
| 718 | No          | 9       | 9-B  | 100    | McF_6 | Inf | unif   | singleC     | J1:CBN, J1:CBN-A, J1:OT, J1:OT-A, J5:CBN-A, J5:OT, J5:OT-A, S5:CBN-A, S5:OT, S5:OT-A                                            |
| 719 | No          | 9       | 9-B  | 100    | McF_6 | Inf | unif   | wholeT_0.01 | J5:CBN-A, J5:OT, J5:OT-A, S5:CBN, S5:CBN-A, S5:OT, S5:OT-A                                                                      |
| 720 | No          | 9       | 9-B  | 100    | McF_6 | Inf | unif   | wholeT_0.5  | J1:CBN, J1:CBN-A, J1:OT, J5:CBN-A, J5:OT, J5:OT-A, S5:CBN, S5:CBN-A, S5:OT, S5:OT-A                                             |
| 721 | No          | 7       | 7-B  | 1000   | Bozic | 0   | last   | singleC     | J1:CBN-A, J1:OT-A, J5:CBN-A, J5:OT-A, S1:CBN, S1:OT-A, S5:OT-A                                                                  |
| 722 | No          | 7       | 7-B  | 1000   | Bozic | 0   | last   | wholeT_0.01 | J1:DiP-A, J1:OT-A, J5:DiP-A, J5:OT-A, S1:DiP-A, S1:OT-A, S5:DiP-A, S5:OT-A                                                      |
| 723 | No          | 7       | 7-B  | 1000   | Bozic | 0   | last   | wholeT_0.5  | J1:CBN-A, J1:OT-A, J5:CBN-A, J5:OT-A, S1:OT-A, S5:CBN, S5:CBN-A, S5:OT-A                                                        |

Table 6: (continued)

|     | Conjunction | Drivers | Tree | S.Size | Model | sh  | S.Time | S.Type      | Best method(s)                                                                                            |
|-----|-------------|---------|------|--------|-------|-----|--------|-------------|-----------------------------------------------------------------------------------------------------------|
| 724 | No          | 7       | 7-B  | 1000   | Bozic | 0   | unif   | singleC     | J1:CBN, J1:CBN-A, J1:OT, J1:OT-A, S1:CBN, S1:CBN-A, S1:OT, S1:OT-A                                        |
| 725 | No          | 7       | 7-B  | 1000   | Bozic | 0   | unif   | wholeT_0.01 | J5:CBN, J5:CBN-A, J5:DiP-A, J5:OT, J5:OT-A                                                                |
| 726 | No          | 7       | 7-B  | 1000   | Bozic | 0   | unif   | wholeT_0.5  | NA                                                                                                        |
| 727 | No          | 7       | 7-B  | 1000   | Bozic | Inf | last   | singleC     | J1:DiP-A, J1:OT-A, J5:DiP-A, J5:OT-A, S1:DiP-A, S5:DiP-A, S5:OT-A                                         |
| 728 | No          | 7       | 7-B  | 1000   | Bozic | Inf | last   | wholeT_0.01 | J5:CBN, J5:CBN-A, J5:DiP, J5:DiP-A, J5:OT, J5:OT-A                                                        |
| 729 | No          | 7       | 7-B  | 1000   | Bozic | Inf | last   | wholeT_0.5  | J1:DiP-A, J1:OT-A, J5:CBN, J5:DiP-A, J5:OT-A, S5:DiP-A, S5:OT-A                                           |
| 730 | No          | 7       | 7-B  | 1000   | Bozic | Inf | unif   | singleC     | J1:CBN, J1:CBN-A, J5:CBN, J5:CBN-A, J5:OT, J5:OT-A, S1:CBN, S1:CBN-A, S5:CBN, S5:CBN-A, S5:OT, S5:OT-A    |
| 731 | No          | 7       | 7-B  | 1000   | Bozic | Inf | unif   | wholeT_0.01 | J1:CBN-A, J1:OT, J1:OT-A, J5:CBN, J5:CBN-A, S5:CBN, S5:CBN-A                                              |
| 732 | No          | 7       | 7-B  | 1000   | Bozic | Inf | unif   | wholeT_0.5  | J1:CBN, J1:CBN-A, J1:OT, J1:OT-A, S1:CBN, S1:CBN-A                                                        |
| 733 | No          | 7       | 7-B  | 1000   | exp   | 0   | last   | singleC     | J1:CBN-A, J1:OT-A, S1:OT-A                                                                                |
| 734 | No          | 7       | 7-B  | 1000   | exp   | 0   | last   | wholeT_0.01 | J1:CBN, J1:CBN-A, J1:OT-A, J5:CBN-A, J5:OT-A, S1:CBN, S1:CBN-A, S1:OT-A, S5:CBN, S5:CBN-A, S5:OT-A        |
| 735 | No          | 7       | 7-B  | 1000   | exp   | 0   | last   | wholeT_0.5  | J1:CBN-A, J1:OT-A, S1:OT-A                                                                                |
| 736 | No          | 7       | 7-B  | 1000   | exp   | 0   | unif   | singleC     | NA                                                                                                        |
| 737 | No          | 7       | 7-B  | 1000   | exp   | 0   | unif   | wholeT_0.01 | J1:CBN, J1:CBN-A, J1:OT-A                                                                                 |
| 738 | No          | 7       | 7-B  | 1000   | exp   | 0   | unif   | wholeT_0.5  | NA                                                                                                        |
| 739 | No          | 7       | 7-B  | 1000   | exp   | Inf | last   | singleC     | J1:OT-A, J5:CBN-A, J5:OT-A, S1:OT-A, S5:OT-A                                                              |
| 740 | No          | 7       | 7-B  | 1000   | exp   | Inf | last   | wholeT_0.01 | J1:CBN, J1:CBN-A, J1:DiP-A, J1:OT, J1:OT-A, J5:CBN-A, J5:DiP-A, J5:OT-A, S5:CBN, S5:CBN-A, S5:OT, S5:OT-A |
| 741 | No          | 7       | 7-B  | 1000   | exp   | Inf | last   | wholeT_0.5  | J1:OT-A, J5:CBN-A, J5:OT-A, S1:OT-A, S5:OT-A                                                              |
| 742 | No          | 7       | 7-B  | 1000   | exp   | Inf | unif   | singleC     | J1:CBN, J1:CBN-A, J1:OT, J1:OT-A, S1:CBN, S1:CBN-A                                                        |
| 743 | No          | 7       | 7-B  | 1000   | exp   | Inf | unif   | wholeT_0.01 | J1:CBN, J1:CBN-A, J1:OT, J1:OT-A, J5:CBN, J5:CBN-A, J5:OT, J5:OT-A, S5:CBN, S5:CBN-A, S5:OT, S5:OT-A      |
| 744 | No          | 7       | 7-B  | 1000   | exp   | Inf | unif   | wholeT_0.5  | J1:CBN, J1:CBN-A, J1:OT, J1:OT-A, S1:CBN, S1:CBN-A                                                        |



Table 6: (continued)

|     | Conjunction | Drivers | Tree | S.Size | Model | sh  | S.Time | S.Type      | Best method(s)                                                                                                                                                               |
|-----|-------------|---------|------|--------|-------|-----|--------|-------------|------------------------------------------------------------------------------------------------------------------------------------------------------------------------------|
| 745 | No          | 7       | 7-B  | 1000   | McF_4 | 0   | last   | singleC     | J1:DiP-A, J1:OT-A, J5:DiP-A, J5:OT-A, S1:DiP, S1:DiP-A, S1:OT, S1:OT-A, S5:DiP, S5:DiP-A, S5:OT, S5:OT-A                                                                     |
| 746 | No          | 7       | 7-B  | 1000   | McF_4 | 0   | last   | wholeT_0.01 | J1:CBN-A, J1:DiP, J1:DiP-A, J1:OT, J1:OT-A, J5:DiP-A, J5:OT-A, S1:DiP, S1:DiP-A, S5:DiP, S5:DiP-A, S5:OT, S5:OT-A                                                            |
| 747 | No          | 7       | 7-B  | 1000   | McF_4 | 0   | last   | wholeT_0.5  | J1:DiP-A, J1:OT-A, J5:DiP-A, J5:OT-A, S1:DiP, S1:DiP-A, S1:OT, S1:OT-A, S5:DiP, S5:DiP-A, S5:OT, S5:OT-A                                                                     |
| 748 | No          | 7       | 7-B  | 1000   | McF_4 | 0   | unif   | singleC     | J1:CBN-A, J1:DiP, J1:DiP-A, J1:OT, J1:OT-A, J5:CBN, J5:CBN-A, J5:DiP, J5:DiP-A, J5:OT, J5:OT-A, S1:DiP, S1:DiP-A, S1:OT, S1:OT-A, S5:CBN-A, S5:DiP, S5:DiP-A, S5:OT, S5:OT-A |
| 749 | No          | 7       | 7-B  | 1000   | McF_4 | 0   | unif   | wholeT_0.01 | J1:CBN, J1:DiP, J1:DiP-A, J1:OT, J1:OT-A, J5:CBN, J5:DiP, J5:DiP-A, J5:OT, J5:OT-A, S1:DiP, S1:DiP-A, S5:CBN, S5:CBN-A, S5:DiP, S5:DiP-A, S5:OT, S5:OT-A                     |
| 750 | No          | 7       | 7-B  | 1000   | McF_4 | 0   | unif   | wholeT_0.5  | J1:CBN-A, J1:DiP, J1:DiP-A, J1:OT, J1:OT-A, J5:CBN, J5:CBN-A, J5:DiP, J5:DiP-A, J5:OT, J5:OT-A, S1:DiP, S1:DiP-A, S1:OT, S1:OT-A, S5:CBN-A, S5:DiP, S5:DiP-A, S5:OT, S5:OT-A |
| 751 | No          | 7       | 7-B  | 1000   | McF_4 | Inf | last   | singleC     | J1:DiP-A, J1:OT-A, J5:DiP-A, J5:OT-A, S1:DiP, S1:DiP-A, S1:OT, S1:OT-A, S5:DiP, S5:DiP-A, S5:OT, S5:OT-A                                                                     |
| 752 | No          | 7       | 7-B  | 1000   | McF_4 | Inf | last   | wholeT_0.01 | J1:DiP, J1:DiP-A, J1:OT, J1:OT-A, J5:DiP-A, J5:OT-A, S1:DiP, S1:DiP-A, S5:DiP, S5:DiP-A, S5:OT, S5:OT-A                                                                      |
| 753 | No          | 7       | 7-B  | 1000   | McF_4 | Inf | last   | wholeT_0.5  | J1:DiP-A, J1:OT-A, J5:DiP-A, J5:OT-A, S1:DiP, S1:DiP-A, S1:OT, S1:OT-A, S5:DiP, S5:DiP-A, S5:OT, S5:OT-A                                                                     |
| 754 | No          | 7       | 7-B  | 1000   | McF_4 | Inf | unif   | singleC     | J1:CBN-A, J1:DiP-A, J1:OT, J1:OT-A, J5:CBN-A, J5:DiP-A, J5:OT, J5:OT-A, S1:DiP, S1:DiP-A, S1:OT, S1:OT-A, S5:CBN-A, S5:DiP-A, S5:OT, S5:OT-A                                 |

Table 6: (continued)

|     | Conjunction | Drivers | Tree | S.Size | Model | sh  | S.Time | S.Type      | Best method(s)                                                                                                                                                     |
|-----|-------------|---------|------|--------|-------|-----|--------|-------------|--------------------------------------------------------------------------------------------------------------------------------------------------------------------|
| 755 | No          | 7       | 7-B  | 1000   | McF_4 | Inf | unif   | wholeT_0.01 | J1:DiP-A, J1:OT, J1:OT-A, J5:CBN-A, J5:DiP-A, J5:OT, J5:OT-A, S1:DiP, S1:DiP-A, S5:DiP-A, S5:OT, S5:OT-A                                                           |
| 756 | No          | 7       | 7-B  | 1000   | McF_4 | Inf | unif   | wholeT_0.5  | J1:DiP-A, J1:OT, J1:OT-A, J5:CBN-A, J5:DiP-A, J5:OT, J5:OT-A, S1:DiP, S1:DiP-A, S1:OT, S1:OT-A, S5:DiP-A, S5:OT, S5:OT-A                                           |
| 757 | No          | 7       | 7-B  | 1000   | McF_6 | 0   | last   | singleC     | J1:DiP, J1:DiP-A, J1:OT, J1:OT-A, J5:DiP, J5:DiP-A, J5:OT, J5:OT-A, S1:DiP, S1:DiP-A, S5:DiP, S5:DiP-A, S5:OT, S5:OT-A                                             |
| 758 | No          | 7       | 7-B  | 1000   | McF_6 | 0   | last   | wholeT_0.01 | J1:DiP, J1:DiP-A, J5:DiP, J5:DiP-A, J5:OT, J5:OT-A, S1:DiP, S1:DiP-A, S5:DiP, S5:DiP-A, S5:OT, S5:OT-A                                                             |
| 759 | No          | 7       | 7-B  | 1000   | McF_6 | 0   | last   | wholeT_0.5  | J1:DiP, J1:DiP-A, J1:OT, J1:OT-A, J5:DiP, J5:DiP-A, J5:OT, J5:OT-A, S1:DiP, S1:DiP-A, S1:OT, S1:OT-A, S5:DiP, S5:DiP-A, S5:OT, S5:OT-A                             |
| 760 | No          | 7       | 7-B  | 1000   | McF_6 | 0   | unif   | singleC     | none                                                                                                                                                               |
| 761 | No          | 7       | 7-B  | 1000   | McF_6 | 0   | unif   | wholeT_0.01 | J1:CBN, J1:CBN-A, J1:DiP, J1:DiP-A, J1:OT, J1:OT-A, J5:CBN, J5:CBN-A, J5:DiP, J5:DiP-A, J5:OT, J5:OT-A, S1:DiP, S5:CBN, S5:CBN-A, S5:DiP, S5:DiP-A, S5:OT, S5:OT-A |
| 762 | No          | 7       | 7-B  | 1000   | McF_6 | 0   | unif   | wholeT_0.5  | none                                                                                                                                                               |
| 763 | No          | 7       | 7-B  | 1000   | McF_6 | Inf | last   | singleC     | J1:DiP, J1:DiP-A, J1:OT, J1:OT-A, J5:DiP, J5:DiP-A, J5:OT, J5:OT-A, S1:DiP, S1:DiP-A, S5:DiP, S5:DiP-A, S5:OT, S5:OT-A                                             |
| 764 | No          | 7       | 7-B  | 1000   | McF_6 | Inf | last   | wholeT_0.01 | J1:DiP-A, J5:DiP-A, J5:OT, J5:OT-A, S1:DiP-A, S5:DiP-A, S5:OT, S5:OT-A                                                                                             |
| 765 | No          | 7       | 7-B  | 1000   | McF_6 | Inf | last   | wholeT_0.5  | J1:DiP, J1:DiP-A, J1:OT, J1:OT-A, J5:DiP, J5:DiP-A, J5:OT, J5:OT-A, S1:DiP, S1:DiP-A, S5:DiP, S5:DiP-A, S5:OT, S5:OT-A                                             |

Table 6: (continued)

|     | Conjunction | Drivers | Tree | S.Size | Model | sh  | S.Time | S.Type      | Best method(s)                                                                                                                                                                                 |
|-----|-------------|---------|------|--------|-------|-----|--------|-------------|------------------------------------------------------------------------------------------------------------------------------------------------------------------------------------------------|
| 766 | No          | 7       | 7-B  | 1000   | McF_6 | Inf | unif   | singleC     | J1:CBN, J1:CBN-A, J1:DiP, J1:DiP-A, J1:OT, J1:OT-A, J5:CBN-A, J5:DiP-A, J5:OT, J5:OT-A, S1:CBN, S1:CBN-A, S1:DiP, S1:DiP-A, S1:OT, S1:OT-A, S5:CBN, S5:CBN-A, S5:DiP, S5:DiP-A, S5:OT, S5:OT-A |
| 767 | No          | 7       | 7-B  | 1000   | McF_6 | Inf | unif   | wholeT_0.01 | J1:CBN, J1:CBN-A, J1:DiP, J1:DiP-A, J1:OT, J1:OT-A, J5:CBN, J5:CBN-A, J5:DiP, J5:DiP-A, J5:OT, J5:OT-A, S5:CBN, S5:CBN-A, S5:DiP, S5:DiP-A, S5:OT, S5:OT-A                                     |
| 768 | No          | 7       | 7-B  | 1000   | McF_6 | Inf | unif   | wholeT_0.5  | none                                                                                                                                                                                           |
| 769 | No          | 7       | 7-B  | 200    | Bozic | 0   | last   | singleC     | J1:CBN-A, J1:OT-A, J5:CBN-A, J5:OT-A, S5:CBN, S5:OT-A                                                                                                                                          |
| 770 | No          | 7       | 7-B  | 200    | Bozic | 0   | last   | wholeT_0.01 | J1:OT-A, J5:OT-A, S5:OT-A                                                                                                                                                                      |
| 771 | No          | 7       | 7-B  | 200    | Bozic | 0   | last   | wholeT_0.5  | J1:CBN-A, J1:OT-A, J5:CBN-A, J5:OT-A, S5:CBN, S5:CBN-A, S5:OT-A                                                                                                                                |
| 772 | No          | 7       | 7-B  | 200    | Bozic | 0   | unif   | singleC     | J1:CBN, J1:CBN-A, J1:OT, J1:OT-A, S1:OT, S1:OT-A                                                                                                                                               |
| 773 | No          | 7       | 7-B  | 200    | Bozic | 0   | unif   | wholeT_0.01 | J5:CBN, J5:CBN-A, J5:OT, J5:OT-A                                                                                                                                                               |
| 774 | No          | 7       | 7-B  | 200    | Bozic | 0   | unif   | wholeT_0.5  | J1:OT, J1:OT-A, S1:CBN, S1:CBN-A, S1:OT, S1:OT-A                                                                                                                                               |
| 775 | No          | 7       | 7-B  | 200    | Bozic | Inf | last   | singleC     | J5:CBN, J5:OT-A, S5:OT-A                                                                                                                                                                       |
| 776 | No          | 7       | 7-B  | 200    | Bozic | Inf | last   | wholeT_0.01 | J5:CBN, J5:CBN-A, J5:OT, J5:OT-A                                                                                                                                                               |
| 777 | No          | 7       | 7-B  | 200    | Bozic | Inf | last   | wholeT_0.5  | J5:CBN, J5:OT-A, S5:OT-A                                                                                                                                                                       |
| 778 | No          | 7       | 7-B  | 200    | Bozic | Inf | unif   | singleC     | J1:CBN, J1:CBN-A, J5:CBN, J5:CBN-A, J5:OT, J5:OT-A, S5:CBN, S5:CBN-A, S5:OT, S5:OT-A                                                                                                           |
| 779 | No          | 7       | 7-B  | 200    | Bozic | Inf | unif   | wholeT_0.01 | J5:CBN, J5:CBN-A, J5:OT, J5:OT-A, S5:CBN, S5:CBN-A, S5:OT, S5:OT-A                                                                                                                             |
| 780 | No          | 7       | 7-B  | 200    | Bozic | Inf | unif   | wholeT_0.5  | J1:CBN, J1:CBN-A                                                                                                                                                                               |
| 781 | No          | 7       | 7-B  | 200    | exp   | 0   | last   | singleC     | J1:OT-A, S1:OT-A                                                                                                                                                                               |
| 782 | No          | 7       | 7-B  | 200    | exp   | 0   | last   | wholeT_0.01 | J1:CBN, J1:CBN-A, J1:OT-A, J5:CBN-A, J5:OT-A, S1:CBN, S1:CBN-A, S5:CBN, S5:CBN-A                                                                                                               |
| 783 | No          | 7       | 7-B  | 200    | exp   | 0   | last   | wholeT_0.5  | J1:CBN-A, J1:OT-A, S1:OT-A                                                                                                                                                                     |
| 784 | No          | 7       | 7-B  | 200    | exp   | 0   | unif   | singleC     | NA                                                                                                                                                                                             |
| 785 | No          | 7       | 7-B  | 200    | exp   | 0   | unif   | wholeT_0.01 | J1:CBN-A, J1:OT-A                                                                                                                                                                              |
| 786 | No          | 7       | 7-B  | 200    | exp   | 0   | unif   | wholeT_0.5  | NA                                                                                                                                                                                             |
| 787 | No          | 7       | 7-B  | 200    | exp   | Inf | last   | singleC     | J1:OT-A, J5:CBN-A, J5:OT-A, S5:OT-A                                                                                                                                                            |

Table 6: (continued)

|     | Conjunction | Drivers | Tree | S.Size | Model | sh  | S.Time | S.Type      | Best method(s)                                                                                                                     |
|-----|-------------|---------|------|--------|-------|-----|--------|-------------|------------------------------------------------------------------------------------------------------------------------------------|
| 788 | No          | 7       | 7-B  | 200    | exp   | Inf | last   | wholeT_0.01 | J5:CBN, J5:CBN-A, J5:OT-A                                                                                                          |
| 789 | No          | 7       | 7-B  | 200    | exp   | Inf | last   | wholeT_0.5  | J1:CBN, J1:OT-A, J5:CBN-A, J5:OT-A, S5:OT-A                                                                                        |
| 790 | No          | 7       | 7-B  | 200    | exp   | Inf | unif   | singleC     | J1:CBN, J1:CBN-A, J1:OT, J1:OT-A                                                                                                   |
| 791 | No          | 7       | 7-B  | 200    | exp   | Inf | unif   | wholeT_0.01 | J5:CBN, J5:CBN-A, J5:OT, J5:OT-A, S5:CBN, S5:CBN-A, S5:OT, S5:OT-A                                                                 |
| 792 | No          | 7       | 7-B  | 200    | exp   | Inf | unif   | wholeT_0.5  | J1:CBN, J1:CBN-A, J1:OT, J1:OT-A, S1:CBN, S1:CBN-A                                                                                 |
| 793 | No          | 7       | 7-B  | 200    | McF_4 | 0   | last   | singleC     | J1:OT-A, J5:OT-A, S5:OT, S5:OT-A                                                                                                   |
| 794 | No          | 7       | 7-B  | 200    | McF_4 | 0   | last   | wholeT_0.01 | J1:DiP, J1:DiP-A, J1:OT, J1:OT-A, J5:OT-A, S1:DiP, S1:DiP-A, S5:DiP, S5:DiP-A, S5:OT, S5:OT-A                                      |
| 795 | No          | 7       | 7-B  | 200    | McF_4 | 0   | last   | wholeT_0.5  | J1:OT-A, J5:OT-A, S5:OT, S5:OT-A                                                                                                   |
| 796 | No          | 7       | 7-B  | 200    | McF_4 | 0   | unif   | singleC     | J1:CBN, J1:CBN-A, J1:DiP-A, J1:OT, J1:OT-A, J5:CBN, J5:CBN-A, J5:OT, J5:OT-A, S1:DiP-A, S5:CBN, S5:CBN-A, S5:DiP-A, S5:OT, S5:OT-A |
| 797 | No          | 7       | 7-B  | 200    | McF_4 | 0   | unif   | wholeT_0.01 | J1:CBN, J1:CBN-A, J1:DiP-A, J1:OT, J1:OT-A, J5:CBN, J5:CBN-A, J5:DiP-A, J5:OT, J5:OT-A, S5:CBN, S5:CBN-A, S5:DiP-A, S5:OT, S5:OT-A |
| 798 | No          | 7       | 7-B  | 200    | McF_4 | 0   | unif   | wholeT_0.5  | J1:CBN, J1:CBN-A, J1:OT, J1:OT-A, J5:CBN, J5:CBN-A, J5:OT, J5:OT-A, S5:CBN, S5:CBN-A, S5:OT, S5:OT-A                               |
| 799 | No          | 7       | 7-B  | 200    | McF_4 | Inf | last   | singleC     | J1:OT-A, J5:OT-A, S5:OT, S5:OT-A                                                                                                   |
| 800 | No          | 7       | 7-B  | 200    | McF_4 | Inf | last   | wholeT_0.01 | J1:OT, J1:OT-A, J5:OT-A, S5:OT, S5:OT-A                                                                                            |
| 801 | No          | 7       | 7-B  | 200    | McF_4 | Inf | last   | wholeT_0.5  | J1:OT-A, J5:OT-A, S5:OT, S5:OT-A                                                                                                   |
| 802 | No          | 7       | 7-B  | 200    | McF_4 | Inf | unif   | singleC     | J1:OT, J1:OT-A, J5:CBN-A, J5:OT, J5:OT-A, S5:OT, S5:OT-A                                                                           |
| 803 | No          | 7       | 7-B  | 200    | McF_4 | Inf | unif   | wholeT_0.01 | J1:OT, J1:OT-A, J5:CBN-A, J5:OT, J5:OT-A, S5:OT, S5:OT-A                                                                           |
| 804 | No          | 7       | 7-B  | 200    | McF_4 | Inf | unif   | wholeT_0.5  | J1:CBN-A, J1:OT, J1:OT-A, J5:CBN-A, J5:OT, J5:OT-A, S5:CBN-A, S5:OT, S5:OT-A                                                       |
| 805 | No          | 7       | 7-B  | 200    | McF_6 | 0   | last   | singleC     | J1:DiP-A, J1:OT, J1:OT-A, J5:DiP-A, J5:OT, J5:OT-A, S1:DiP-A, S5:DiP-A, S5:OT, S5:OT-A                                             |

Table 6: (continued)

|     | Conjunction | Drivers | Tree | S.Size | Model | sh  | S.Time | S.Type      | Best method(s)                                                                                                                                                       |
|-----|-------------|---------|------|--------|-------|-----|--------|-------------|----------------------------------------------------------------------------------------------------------------------------------------------------------------------|
| 806 | No          | 7       | 7-B  | 200    | McF_6 | 0   | last   | wholeT_0.01 | J1:DiP, J1:DiP-A, J5:DiP, J5:DiP-A, J5:OT, J5:OT-A, S1:DiP, S1:DiP-A, S5:DiP, S5:DiP-A, S5:OT, S5:OT-A                                                               |
| 807 | No          | 7       | 7-B  | 200    | McF_6 | 0   | last   | wholeT_0.5  | J1:DiP-A, J1:OT, J1:OT-A, J5:DiP-A, J5:OT, J5:OT-A, S1:DiP-A, S5:DiP-A, S5:OT, S5:OT-A                                                                               |
| 808 | No          | 7       | 7-B  | 200    | McF_6 | 0   | unif   | singleC     | J1:CBN, J1:CBN-A, J1:DiP, J1:DiP-A, J1:OT, J1:OT-A, J5:CBN, J5:CBN-A, J5:DiP-A, J5:OT, J5:OT-A, S1:DiP, S1:DiP-A, S5:CBN, S5:CBN-A, S5:DiP, S5:DiP-A, S5:OT, S5:OT-A |
| 809 | No          | 7       | 7-B  | 200    | McF_6 | 0   | unif   | wholeT_0.01 | J1:CBN, J1:CBN-A, J1:DiP, J1:DiP-A, J1:OT, J1:OT-A, J5:CBN, J5:CBN-A, J5:DiP-A, J5:OT, J5:OT-A, S1:DiP, S1:DiP-A, S5:CBN, S5:CBN-A, S5:DiP, S5:DiP-A, S5:OT, S5:OT-A |
| 810 | No          | 7       | 7-B  | 200    | McF_6 | 0   | unif   | wholeT_0.5  | J1:CBN, J1:CBN-A, J1:DiP, J1:DiP-A, J1:OT, J1:OT-A, J5:CBN, J5:CBN-A, J5:DiP-A, J5:OT, J5:OT-A, S1:DiP, S5:CBN, S5:CBN-A, S5:DiP, S5:OT, S5:OT-A                     |
| 811 | No          | 7       | 7-B  | 200    | McF_6 | Inf | last   | singleC     | J1:DiP-A, J1:OT, J1:OT-A, J5:DiP-A, J5:OT, J5:OT-A, S1:DiP-A, S5:DiP-A, S5:OT, S5:OT-A                                                                               |
| 812 | No          | 7       | 7-B  | 200    | McF_6 | Inf | last   | wholeT_0.01 | J5:OT, J5:OT-A, S5:OT, S5:OT-A                                                                                                                                       |
| 813 | No          | 7       | 7-B  | 200    | McF_6 | Inf | last   | wholeT_0.5  | J1:DiP-A, J1:OT, J1:OT-A, J5:DiP-A, J5:OT, J5:OT-A, S1:DiP-A, S5:DiP-A, S5:OT, S5:OT-A                                                                               |
| 814 | No          | 7       | 7-B  | 200    | McF_6 | Inf | unif   | singleC     | J1:CBN, J1:CBN-A, J1:DiP-A, J1:OT, J1:OT-A, J5:CBN, J5:CBN-A, J5:OT, J5:OT-A, S5:CBN, S5:CBN-A, S5:OT, S5:OT-A                                                       |
| 815 | No          | 7       | 7-B  | 200    | McF_6 | Inf | unif   | wholeT_0.01 | J1:CBN, J1:CBN-A, J1:DiP-A, J5:CBN, J5:CBN-A, S1:DiP, S5:CBN, S5:CBN-A, S5:DiP-A                                                                                     |
| 816 | No          | 7       | 7-B  | 200    | McF_6 | Inf | unif   | wholeT_0.5  | J1:CBN, J1:CBN-A, J1:DiP-A, J5:CBN, J5:CBN-A, S1:DiP, S5:CBN, S5:CBN-A, S5:DiP, S5:DiP-A                                                                             |
| 817 | No          | 7       | 7-B  | 100    | Bozic | 0   | last   | singleC     | J5:CBN-A, J5:OT-A, S5:OT-A                                                                                                                                           |
| 818 | No          | 7       | 7-B  | 100    | Bozic | 0   | last   | wholeT_0.01 | J5:OT-A, S5:CBN, S5:OT-A                                                                                                                                             |

Table 6: (continued)

|     | Conjunction | Drivers | Tree | S.Size | Model | sh  | S.Time | S.Type      | Best method(s)                                                                                             |
|-----|-------------|---------|------|--------|-------|-----|--------|-------------|------------------------------------------------------------------------------------------------------------|
| 819 | No          | 7       | 7-B  | 100    | Bozic | 0   | last   | wholeT_0.5  | J5:OT-A, S5:CBN, S5:CBN-A, S5:OT-A                                                                         |
| 820 | No          | 7       | 7-B  | 100    | Bozic | 0   | unif   | singleC     | J1:CBN, J1:CBN-A, J1:OT, J1:OT-A                                                                           |
| 821 | No          | 7       | 7-B  | 100    | Bozic | 0   | unif   | wholeT_0.01 | J5:CBN, J5:CBN-A, J5:OT, J5:OT-A                                                                           |
| 822 | No          | 7       | 7-B  | 100    | Bozic | 0   | unif   | wholeT_0.5  | J1:CBN, J1:CBN-A, J1:OT, J1:OT-A,<br>S1:OT, S1:OT-A                                                        |
| 823 | No          | 7       | 7-B  | 100    | Bozic | Inf | last   | singleC     | J5:CBN, J5:OT-A                                                                                            |
| 824 | No          | 7       | 7-B  | 100    | Bozic | Inf | last   | wholeT_0.01 | J5:CBN, J5:CBN-A, J5:OT-A                                                                                  |
| 825 | No          | 7       | 7-B  | 100    | Bozic | Inf | last   | wholeT_0.5  | J5:CBN, J5:OT-A, S5:OT-A                                                                                   |
| 826 | No          | 7       | 7-B  | 100    | Bozic | Inf | unif   | singleC     | J5:CBN, J5:CBN-A, J5:OT, J5:OT-A,<br>S5:CBN, S5:CBN-A                                                      |
| 827 | No          | 7       | 7-B  | 100    | Bozic | Inf | unif   | wholeT_0.01 | J5:CBN, J5:CBN-A, J5:OT, J5:OT-A,<br>S5:CBN-A                                                              |
| 828 | No          | 7       | 7-B  | 100    | Bozic | Inf | unif   | wholeT_0.5  | J5:CBN, J5:CBN-A, J5:OT, J5:OT-A,<br>S5:CBN, S5:CBN-A, S5:OT, S5:OT-A                                      |
| 829 | No          | 7       | 7-B  | 100    | exp   | 0   | last   | singleC     | J1:OT-A, S1:OT-A                                                                                           |
| 830 | No          | 7       | 7-B  | 100    | exp   | 0   | last   | wholeT_0.01 | J1:CBN, J1:CBN-A, J5:CBN-A, J5:OT-<br>A, S5:CBN, S5:CBN-A                                                  |
| 831 | No          | 7       | 7-B  | 100    | exp   | 0   | last   | wholeT_0.5  | J1:OT-A, S1:OT-A                                                                                           |
| 832 | No          | 7       | 7-B  | 100    | exp   | 0   | unif   | singleC     | J1:OT, J1:OT-A, S1:CBN, S1:CBN-A,<br>S1:OT, S1:OT-A                                                        |
| 833 | No          | 7       | 7-B  | 100    | exp   | 0   | unif   | wholeT_0.01 | J1:CBN, J1:CBN-A, J1:OT, J1:OT-A,<br>S1:OT, S1:OT-A                                                        |
| 834 | No          | 7       | 7-B  | 100    | exp   | 0   | unif   | wholeT_0.5  | NA                                                                                                         |
| 835 | No          | 7       | 7-B  | 100    | exp   | Inf | last   | singleC     | J1:OT-A, J5:CBN-A, J5:OT-A, S5:OT-A                                                                        |
| 836 | No          | 7       | 7-B  | 100    | exp   | Inf | last   | wholeT_0.01 | J5:CBN, J5:CBN-A, J5:OT-A                                                                                  |
| 837 | No          | 7       | 7-B  | 100    | exp   | Inf | last   | wholeT_0.5  | J1:OT-A, J5:CBN-A, J5:OT-A, S5:OT-A                                                                        |
| 838 | No          | 7       | 7-B  | 100    | exp   | Inf | unif   | singleC     | J1:CBN, J1:CBN-A, J1:OT, J1:OT-A                                                                           |
| 839 | No          | 7       | 7-B  | 100    | exp   | Inf | unif   | wholeT_0.01 | J5:CBN, J5:CBN-A, J5:OT, J5:OT-A,<br>S5:CBN, S5:OT, S5:OT-A                                                |
| 840 | No          | 7       | 7-B  | 100    | exp   | Inf | unif   | wholeT_0.5  | J1:CBN, J1:CBN-A, J1:OT, J1:OT-A,<br>S1:OT, S1:OT-A                                                        |
| 841 | No          | 7       | 7-B  | 100    | McF_4 | 0   | last   | singleC     | J1:OT-A, J5:OT-A, S5:OT, S5:OT-A                                                                           |
| 842 | No          | 7       | 7-B  | 100    | McF_4 | 0   | last   | wholeT_0.01 | J5:OT-A, S1:DiP, S1:DiP-A, S5:DiP-A,<br>S5:OT, S5:OT-A                                                     |
| 843 | No          | 7       | 7-B  | 100    | McF_4 | 0   | last   | wholeT_0.5  | J5:OT-A, S5:OT, S5:OT-A                                                                                    |
| 844 | No          | 7       | 7-B  | 100    | McF_4 | 0   | unif   | singleC     | J1:CBN, J1:CBN-A, J1:OT, J1:OT-A,<br>J5:CBN, J5:CBN-A, J5:OT, J5:OT-A,<br>S5:CBN, S5:CBN-A, S5:OT, S5:OT-A |

Table 6: (continued)

|     | Conjunction | Drivers | Tree | S.Size | Model | sh  | S.Time | S.Type      | Best method(s)                                                                                         |
|-----|-------------|---------|------|--------|-------|-----|--------|-------------|--------------------------------------------------------------------------------------------------------|
| 845 | No          | 7       | 7-B  | 100    | McF_4 | 0   | unif   | wholeT_0.01 | J1:CBN-A, J1:OT, J1:OT-A, J5:CBN, J5:CBN-A, J5:OT, J5:OT-A, S1:DiP-A, S5:CBN, S5:CBN-A, S5:OT, S5:OT-A |
| 846 | No          | 7       | 7-B  | 100    | McF_4 | 0   | unif   | wholeT_0.5  | J1:CBN, J1:CBN-A, J1:OT, J1:OT-A, J5:CBN, J5:CBN-A, J5:OT, J5:OT-A, S5:CBN-A, S5:OT, S5:OT-A           |
| 847 | No          | 7       | 7-B  | 100    | McF_4 | Inf | last   | singleC     | J1:OT-A, J5:OT-A, S5:OT, S5:OT-A                                                                       |
| 848 | No          | 7       | 7-B  | 100    | McF_4 | Inf | last   | wholeT_0.01 | J5:OT-A, S5:OT, S5:OT-A                                                                                |
| 849 | No          | 7       | 7-B  | 100    | McF_4 | Inf | last   | wholeT_0.5  | J1:OT-A, J5:OT-A, S5:OT, S5:OT-A                                                                       |
| 850 | No          | 7       | 7-B  | 100    | McF_4 | Inf | unif   | singleC     | J1:CBN-A, J1:OT, J1:OT-A, J5:CBN-A, J5:OT, J5:OT-A, S5:OT, S5:OT-A                                     |
| 851 | No          | 7       | 7-B  | 100    | McF_4 | Inf | unif   | wholeT_0.01 | J5:CBN-A, J5:OT, J5:OT-A, S5:CBN-A, S5:OT, S5:OT-A                                                     |
| 852 | No          | 7       | 7-B  | 100    | McF_4 | Inf | unif   | wholeT_0.5  | J1:CBN-A, J5:CBN-A, S5:CBN-A                                                                           |
| 853 | No          | 7       | 7-B  | 100    | McF_6 | 0   | last   | singleC     | J5:OT, J5:OT-A, S5:OT, S5:OT-A                                                                         |
| 854 | No          | 7       | 7-B  | 100    | McF_6 | 0   | last   | wholeT_0.01 | J5:OT, J5:OT-A, S5:OT, S5:OT-A                                                                         |
| 855 | No          | 7       | 7-B  | 100    | McF_6 | 0   | last   | wholeT_0.5  | J5:OT, J5:OT-A, S5:OT, S5:OT-A                                                                         |
| 856 | No          | 7       | 7-B  | 100    | McF_6 | 0   | unif   | singleC     | J1:CBN, J1:CBN-A, J5:CBN, J5:CBN-A, S5:CBN, S5:CBN-A                                                   |
| 857 | No          | 7       | 7-B  | 100    | McF_6 | 0   | unif   | wholeT_0.01 | J1:DiP-A, J5:CBN, J5:CBN-A, J5:DiP-A, S5:CBN, S5:CBN-A, S5:DiP, S5:DiP-A                               |
| 858 | No          | 7       | 7-B  | 100    | McF_6 | 0   | unif   | wholeT_0.5  | J1:CBN, J1:CBN-A, J5:CBN, J5:CBN-A, S5:CBN, S5:CBN-A                                                   |
| 859 | No          | 7       | 7-B  | 100    | McF_6 | Inf | last   | singleC     | J5:OT, J5:OT-A, S5:OT, S5:OT-A                                                                         |
| 860 | No          | 7       | 7-B  | 100    | McF_6 | Inf | last   | wholeT_0.01 | J5:OT, J5:OT-A, S5:OT, S5:OT-A                                                                         |
| 861 | No          | 7       | 7-B  | 100    | McF_6 | Inf | last   | wholeT_0.5  | J1:OT, J1:OT-A, J5:OT, J5:OT-A, S5:OT, S5:OT-A                                                         |
| 862 | No          | 7       | 7-B  | 100    | McF_6 | Inf | unif   | singleC     | J1:CBN, J1:CBN-A, J5:CBN, J5:CBN-A, S5:CBN, S5:CBN-A                                                   |
| 863 | No          | 7       | 7-B  | 100    | McF_6 | Inf | unif   | wholeT_0.01 | J5:CBN, J5:CBN-A, S5:CBN, S5:CBN-A                                                                     |
| 864 | No          | 7       | 7-B  | 100    | McF_6 | Inf | unif   | wholeT_0.5  | J1:CBN, J1:CBN-A, J5:CBN, J5:CBN-A, S5:CBN, S5:CBN-A                                                   |

### 3.3 Confidence sets (MCB-2), PND, Drivers Unknown

Table 7: Confidence sets (method MCB-2) when Drivers are Unknown for measure PND.

|    | Conjunction | Drivers | Tree | S.Size | Model | sh  | S.Time | S.Type      | Best method(s)                                                                                                           |
|----|-------------|---------|------|--------|-------|-----|--------|-------------|--------------------------------------------------------------------------------------------------------------------------|
| 1  | Yes         | 11      | 11-A | 1000   | Bozic | 0   | last   | singleC     | S1:OT, S1:OT-A                                                                                                           |
| 2  | Yes         | 11      | 11-A | 1000   | Bozic | 0   | last   | wholeT_0.01 | S1:DiP, S1:DiP-A, S1:OT, S1:OT-A, S5:DiP, S5:DiP-A, S5:OT, S5:OT-A                                                       |
| 3  | Yes         | 11      | 11-A | 1000   | Bozic | 0   | last   | wholeT_0.5  | S1:OT, S1:OT-A                                                                                                           |
| 4  | Yes         | 11      | 11-A | 1000   | Bozic | 0   | unif   | singleC     | S1:CBN, S1:CBN-A, S1:DiP, S1:DiP-A, S1:OT, S1:OT-A                                                                       |
| 5  | Yes         | 11      | 11-A | 1000   | Bozic | 0   | unif   | wholeT_0.01 | S1:CBN, S1:CBN-A                                                                                                         |
| 6  | Yes         | 11      | 11-A | 1000   | Bozic | 0   | unif   | wholeT_0.5  | none                                                                                                                     |
| 7  | Yes         | 11      | 11-A | 1000   | Bozic | Inf | last   | singleC     | S1:DiP, S1:DiP-A, S1:OT, S1:OT-A, S5:DiP, S5:DiP-A, S5:OT, S5:OT-A                                                       |
| 8  | Yes         | 11      | 11-A | 1000   | Bozic | Inf | last   | wholeT_0.01 | J1:DiP, J1:DiP-A, J1:OT, J1:OT-A, S1:DiP, S1:DiP-A, S1:OT, S1:OT-A, S5:DiP, S5:DiP-A, S5:OT, S5:OT-A                     |
| 9  | Yes         | 11      | 11-A | 1000   | Bozic | Inf | last   | wholeT_0.5  | S1:CBN, S1:OT, S1:OT-A                                                                                                   |
| 10 | Yes         | 11      | 11-A | 1000   | Bozic | Inf | unif   | singleC     | S1:CBN-A, S1:DiP-A, S1:OT, S1:OT-A                                                                                       |
| 11 | Yes         | 11      | 11-A | 1000   | Bozic | Inf | unif   | wholeT_0.01 | S1:CBN, S1:CBN-A, S1:DiP, S1:DiP-A, S1:OT, S1:OT-A, S5:CBN, S5:CBN-A, S5:DiP, S5:DiP-A, S5:OT, S5:OT-A                   |
| 12 | Yes         | 11      | 11-A | 1000   | Bozic | Inf | unif   | wholeT_0.5  | S1:CBN, S1:CBN-A, S1:OT, S1:OT-A                                                                                         |
| 13 | Yes         | 11      | 11-A | 1000   | exp   | 0   | last   | singleC     | S1:OT, S1:OT-A                                                                                                           |
| 14 | Yes         | 11      | 11-A | 1000   | exp   | 0   | last   | wholeT_0.01 | S1:DiP-A, S1:OT, S1:OT-A, S5:DiP-A, S5:OT, S5:OT-A                                                                       |
| 15 | Yes         | 11      | 11-A | 1000   | exp   | 0   | last   | wholeT_0.5  | S1:OT, S1:OT-A                                                                                                           |
| 16 | Yes         | 11      | 11-A | 1000   | exp   | 0   | unif   | singleC     | none                                                                                                                     |
| 17 | Yes         | 11      | 11-A | 1000   | exp   | 0   | unif   | wholeT_0.01 | S1:CBN, S1:CBN-A, S1:OT, S1:OT-A                                                                                         |
| 18 | Yes         | 11      | 11-A | 1000   | exp   | 0   | unif   | wholeT_0.5  | none                                                                                                                     |
| 19 | Yes         | 11      | 11-A | 1000   | exp   | Inf | last   | singleC     | S1:OT, S1:OT-A                                                                                                           |
| 20 | Yes         | 11      | 11-A | 1000   | exp   | Inf | last   | wholeT_0.01 | J1:CBN-A, J1:DiP, J1:DiP-A, J1:OT, J1:OT-A, S1:DiP, S1:DiP-A, S1:OT, S1:OT-A, S5:CBN-A, S5:DiP, S5:DiP-A, S5:OT, S5:OT-A |
| 21 | Yes         | 11      | 11-A | 1000   | exp   | Inf | last   | wholeT_0.5  | S1:CBN, S1:DiP, S1:DiP-A, S1:OT, S1:OT-A, S5:DiP, S5:DiP-A, S5:OT, S5:OT-A                                               |
| 22 | Yes         | 11      | 11-A | 1000   | exp   | Inf | unif   | singleC     | S1:CBN-A, S1:OT, S1:OT-A                                                                                                 |
| 23 | Yes         | 11      | 11-A | 1000   | exp   | Inf | unif   | wholeT_0.01 | S1:CBN, S1:CBN-A, S1:DiP-A, S1:OT, S1:OT-A                                                                               |



Table 7: (continued)

|    | Conjunction | Drivers | Tree | S.Size | Model | sh  | S.Time | S.Type      | Best method(s)                                                                   |
|----|-------------|---------|------|--------|-------|-----|--------|-------------|----------------------------------------------------------------------------------|
| 24 | Yes         | 11      | 11-A | 1000   | exp   | Inf | unif   | wholeT_0.5  | S1:OT, S1:OT-A                                                                   |
| 25 | Yes         | 11      | 11-A | 1000   | McF_4 | 0   | last   | singleC     | S1:DiP-A, S1:OT, S1:OT-A                                                         |
| 26 | Yes         | 11      | 11-A | 1000   | McF_4 | 0   | last   | wholeT_0.01 | S1:DiP-A, S1:OT, S1:OT-A                                                         |
| 27 | Yes         | 11      | 11-A | 1000   | McF_4 | 0   | last   | wholeT_0.5  | S1:DiP-A, S1:OT, S1:OT-A                                                         |
| 28 | Yes         | 11      | 11-A | 1000   | McF_4 | 0   | unif   | singleC     | S1:DiP, S1:DiP-A, S1:OT, S1:OT-A                                                 |
| 29 | Yes         | 11      | 11-A | 1000   | McF_4 | 0   | unif   | wholeT_0.01 | S1:CBN, S1:CBN-A, S1:OT, S1:OT-A                                                 |
| 30 | Yes         | 11      | 11-A | 1000   | McF_4 | 0   | unif   | wholeT_0.5  | S1:CBN, S1:DiP, S1:DiP-A, S1:OT,<br>S1:OT-A, S5:DiP, S5:DiP-A, S5:OT,<br>S5:OT-A |
| 31 | Yes         | 11      | 11-A | 1000   | McF_4 | Inf | last   | singleC     | S1:OT, S1:OT-A                                                                   |
| 32 | Yes         | 11      | 11-A | 1000   | McF_4 | Inf | last   | wholeT_0.01 | S1:OT, S1:OT-A, S5:OT, S5:OT-A                                                   |
| 33 | Yes         | 11      | 11-A | 1000   | McF_4 | Inf | last   | wholeT_0.5  | S1:DiP-A, S1:OT, S1:OT-A                                                         |
| 34 | Yes         | 11      | 11-A | 1000   | McF_4 | Inf | unif   | singleC     | S1:OT, S1:OT-A                                                                   |
| 35 | Yes         | 11      | 11-A | 1000   | McF_4 | Inf | unif   | wholeT_0.01 | S1:OT, S1:OT-A                                                                   |
| 36 | Yes         | 11      | 11-A | 1000   | McF_4 | Inf | unif   | wholeT_0.5  | S1:CBN, S1:CBN-A, S1:OT, S1:OT-A                                                 |
| 37 | Yes         | 11      | 11-A | 1000   | McF_6 | 0   | last   | singleC     | S1:DiP, S1:DiP-A                                                                 |
| 38 | Yes         | 11      | 11-A | 1000   | McF_6 | 0   | last   | wholeT_0.01 | S1:DiP, S1:DiP-A, S5:DiP, S5:DiP-A                                               |
| 39 | Yes         | 11      | 11-A | 1000   | McF_6 | 0   | last   | wholeT_0.5  | S1:DiP, S1:DiP-A                                                                 |
| 40 | Yes         | 11      | 11-A | 1000   | McF_6 | 0   | unif   | singleC     | S1:CBN, S1:CBN-A, S1:DiP, S1:DiP-A,<br>S1:OT, S1:OT-A                            |
| 41 | Yes         | 11      | 11-A | 1000   | McF_6 | 0   | unif   | wholeT_0.01 | S1:CBN, S1:CBN-A, S1:DiP, S1:DiP-A,<br>S1:OT, S1:OT-A                            |
| 42 | Yes         | 11      | 11-A | 1000   | McF_6 | 0   | unif   | wholeT_0.5  | S1:CBN, S1:CBN-A, S1:DiP, S1:DiP-A,<br>S1:OT, S1:OT-A                            |
| 43 | Yes         | 11      | 11-A | 1000   | McF_6 | Inf | last   | singleC     | S1:DiP-A, S1:OT, S1:OT-A                                                         |
| 44 | Yes         | 11      | 11-A | 1000   | McF_6 | Inf | last   | wholeT_0.01 | S1:DiP-A, S5:DiP-A                                                               |
| 45 | Yes         | 11      | 11-A | 1000   | McF_6 | Inf | last   | wholeT_0.5  | S1:DiP, S1:DiP-A, S1:OT, S1:OT-A                                                 |
| 46 | Yes         | 11      | 11-A | 1000   | McF_6 | Inf | unif   | singleC     | S1:CBN, S1:CBN-A, S1:DiP, S1:DiP-A,<br>S1:OT, S1:OT-A                            |
| 47 | Yes         | 11      | 11-A | 1000   | McF_6 | Inf | unif   | wholeT_0.01 | S1:CBN, S1:CBN-A, S1:DiP, S1:DiP-A,<br>S1:OT, S1:OT-A                            |
| 48 | Yes         | 11      | 11-A | 1000   | McF_6 | Inf | unif   | wholeT_0.5  | S1:CBN, S1:CBN-A, S1:DiP, S1:DiP-A,<br>S1:OT, S1:OT-A                            |
| 49 | Yes         | 11      | 11-A | 200    | Bozic | 0   | last   | singleC     | S1:CBN, S1:CBN-A, S1:OT, S1:OT-A                                                 |
| 50 | Yes         | 11      | 11-A | 200    | Bozic | 0   | last   | wholeT_0.01 | S1:CBN, S1:CBN-A, S1:OT, S1:OT-A                                                 |
| 51 | Yes         | 11      | 11-A | 200    | Bozic | 0   | last   | wholeT_0.5  | S1:CBN-A, S1:OT, S1:OT-A                                                         |
| 52 | Yes         | 11      | 11-A | 200    | Bozic | 0   | unif   | singleC     | S1:CBN, S1:CBN-A, S1:OT, S1:OT-A                                                 |
| 53 | Yes         | 11      | 11-A | 200    | Bozic | 0   | unif   | wholeT_0.01 | S1:CBN, S1:CBN-A                                                                 |
| 54 | Yes         | 11      | 11-A | 200    | Bozic | 0   | unif   | wholeT_0.5  | J1:CBN, J1:CBN-A, J1:OT, J1:OT-A,<br>S1:CBN, S1:CBN-A, S1:OT, S1:OT-A            |

Table 7: (continued)

|    | Conjunction | Drivers | Tree | S.Size | Model | sh  | S.Time | S.Type      | Best method(s)                                                     |
|----|-------------|---------|------|--------|-------|-----|--------|-------------|--------------------------------------------------------------------|
| 55 | Yes         | 11      | 11-A | 200    | Bozic | Inf | last   | singleC     | S1:OT, S1:OT-A                                                     |
| 56 | Yes         | 11      | 11-A | 200    | Bozic | Inf | last   | wholeT_0.01 | J1:OT, J1:OT-A, S1:CBN-A, S1:OT, S1:OT-A, S5:CBN-A, S5:OT, S5:OT-A |
| 57 | Yes         | 11      | 11-A | 200    | Bozic | Inf | last   | wholeT_0.5  | S1:OT, S1:OT-A                                                     |
| 58 | Yes         | 11      | 11-A | 200    | Bozic | Inf | unif   | singleC     | S1:CBN, S1:CBN-A, S1:OT, S1:OT-A                                   |
| 59 | Yes         | 11      | 11-A | 200    | Bozic | Inf | unif   | wholeT_0.01 | S1:CBN, S1:CBN-A, S1:OT, S1:OT-A, S5:OT, S5:OT-A                   |
| 60 | Yes         | 11      | 11-A | 200    | Bozic | Inf | unif   | wholeT_0.5  | S1:CBN-A, S1:OT, S1:OT-A                                           |
| 61 | Yes         | 11      | 11-A | 200    | exp   | 0   | last   | singleC     | S1:OT, S1:OT-A                                                     |
| 62 | Yes         | 11      | 11-A | 200    | exp   | 0   | last   | wholeT_0.01 | S1:CBN-A, S1:OT, S1:OT-A, S5:OT, S5:OT-A                           |
| 63 | Yes         | 11      | 11-A | 200    | exp   | 0   | last   | wholeT_0.5  | S1:OT, S1:OT-A                                                     |
| 64 | Yes         | 11      | 11-A | 200    | exp   | 0   | unif   | singleC     | none                                                               |
| 65 | Yes         | 11      | 11-A | 200    | exp   | 0   | unif   | wholeT_0.01 | S1:CBN, S1:CBN-A, S1:OT, S1:OT-A                                   |
| 66 | Yes         | 11      | 11-A | 200    | exp   | 0   | unif   | wholeT_0.5  | none                                                               |
| 67 | Yes         | 11      | 11-A | 200    | exp   | Inf | last   | singleC     | S1:OT, S1:OT-A, S5:OT, S5:OT-A                                     |
| 68 | Yes         | 11      | 11-A | 200    | exp   | Inf | last   | wholeT_0.01 | J1:OT, J1:OT-A, S1:CBN-A, S1:OT, S1:OT-A, S5:OT, S5:OT-A           |
| 69 | Yes         | 11      | 11-A | 200    | exp   | Inf | last   | wholeT_0.5  | S1:CBN, S1:CBN-A, S1:OT, S1:OT-A                                   |
| 70 | Yes         | 11      | 11-A | 200    | exp   | Inf | unif   | singleC     | S1:OT, S1:OT-A                                                     |
| 71 | Yes         | 11      | 11-A | 200    | exp   | Inf | unif   | wholeT_0.01 | S1:CBN, S1:CBN-A, S1:OT, S1:OT-A                                   |
| 72 | Yes         | 11      | 11-A | 200    | exp   | Inf | unif   | wholeT_0.5  | S1:CBN, S1:CBN-A, S1:OT, S1:OT-A                                   |
| 73 | Yes         | 11      | 11-A | 200    | McF_4 | 0   | last   | singleC     | S1:OT, S1:OT-A                                                     |
| 74 | Yes         | 11      | 11-A | 200    | McF_4 | 0   | last   | wholeT_0.01 | S1:OT, S1:OT-A                                                     |
| 75 | Yes         | 11      | 11-A | 200    | McF_4 | 0   | last   | wholeT_0.5  | S1:OT, S1:OT-A                                                     |
| 76 | Yes         | 11      | 11-A | 200    | McF_4 | 0   | unif   | singleC     | S1:CBN, S1:CBN-A, S1:OT, S1:OT-A                                   |
| 77 | Yes         | 11      | 11-A | 200    | McF_4 | 0   | unif   | wholeT_0.01 | S1:CBN, S1:CBN-A, S1:OT, S1:OT-A                                   |
| 78 | Yes         | 11      | 11-A | 200    | McF_4 | 0   | unif   | wholeT_0.5  | S1:OT, S1:OT-A                                                     |
| 79 | Yes         | 11      | 11-A | 200    | McF_4 | Inf | last   | singleC     | S1:OT, S1:OT-A                                                     |
| 80 | Yes         | 11      | 11-A | 200    | McF_4 | Inf | last   | wholeT_0.01 | S1:OT, S1:OT-A, S5:OT, S5:OT-A                                     |
| 81 | Yes         | 11      | 11-A | 200    | McF_4 | Inf | last   | wholeT_0.5  | S1:OT, S1:OT-A                                                     |
| 82 | Yes         | 11      | 11-A | 200    | McF_4 | Inf | unif   | singleC     | S1:OT, S1:OT-A                                                     |
| 83 | Yes         | 11      | 11-A | 200    | McF_4 | Inf | unif   | wholeT_0.01 | S1:CBN-A, S1:OT, S1:OT-A                                           |
| 84 | Yes         | 11      | 11-A | 200    | McF_4 | Inf | unif   | wholeT_0.5  | S1:CBN, S1:OT, S1:OT-A                                             |
| 85 | Yes         | 11      | 11-A | 200    | McF_6 | 0   | last   | singleC     | S1:OT, S1:OT-A                                                     |
| 86 | Yes         | 11      | 11-A | 200    | McF_6 | 0   | last   | wholeT_0.01 | S1:OT, S1:OT-A, S5:OT, S5:OT-A                                     |
| 87 | Yes         | 11      | 11-A | 200    | McF_6 | 0   | last   | wholeT_0.5  | S1:OT, S1:OT-A                                                     |
| 88 | Yes         | 11      | 11-A | 200    | McF_6 | 0   | unif   | singleC     | S1:CBN, S1:CBN-A, S1:OT, S1:OT-A                                   |
| 89 | Yes         | 11      | 11-A | 200    | McF_6 | 0   | unif   | wholeT_0.01 | S1:CBN, S1:CBN-A, S1:OT, S1:OT-A                                   |
| 90 | Yes         | 11      | 11-A | 200    | McF_6 | 0   | unif   | wholeT_0.5  | S1:CBN, S1:CBN-A, S1:OT, S1:OT-A                                   |

Table 7: (continued)

|     | Conjunction | Drivers | Tree | S.Size | Model | sh  | S.Time | S.Type      | Best method(s)                                                                                       |
|-----|-------------|---------|------|--------|-------|-----|--------|-------------|------------------------------------------------------------------------------------------------------|
| 91  | Yes         | 11      | 11-A | 200    | McF_6 | Inf | last   | singleC     | S1:OT, S1:OT-A                                                                                       |
| 92  | Yes         | 11      | 11-A | 200    | McF_6 | Inf | last   | wholeT_0.01 | S1:OT, S1:OT-A, S5:OT, S5:OT-A                                                                       |
| 93  | Yes         | 11      | 11-A | 200    | McF_6 | Inf | last   | wholeT_0.5  | S1:OT, S1:OT-A                                                                                       |
| 94  | Yes         | 11      | 11-A | 200    | McF_6 | Inf | unif   | singleC     | S1:CBN, S1:CBN-A, S1:OT, S1:OT-A                                                                     |
| 95  | Yes         | 11      | 11-A | 200    | McF_6 | Inf | unif   | wholeT_0.01 | S1:OT, S1:OT-A                                                                                       |
| 96  | Yes         | 11      | 11-A | 200    | McF_6 | Inf | unif   | wholeT_0.5  | S1:CBN-A, S1:OT, S1:OT-A                                                                             |
| 97  | Yes         | 11      | 11-A | 100    | Bozic | 0   | last   | singleC     | S1:CBN, S1:CBN-A, S1:OT, S1:OT-A                                                                     |
| 98  | Yes         | 11      | 11-A | 100    | Bozic | 0   | last   | wholeT_0.01 | S1:CBN, S1:OT, S1:OT-A                                                                               |
| 99  | Yes         | 11      | 11-A | 100    | Bozic | 0   | last   | wholeT_0.5  | S1:CBN-A, S1:OT, S1:OT-A                                                                             |
| 100 | Yes         | 11      | 11-A | 100    | Bozic | 0   | unif   | singleC     | S1:CBN, S1:CBN-A, S1:OT, S1:OT-A                                                                     |
| 101 | Yes         | 11      | 11-A | 100    | Bozic | 0   | unif   | wholeT_0.01 | S1:CBN, S1:CBN-A                                                                                     |
| 102 | Yes         | 11      | 11-A | 100    | Bozic | 0   | unif   | wholeT_0.5  | S1:CBN, S1:CBN-A, S1:OT, S1:OT-A                                                                     |
| 103 | Yes         | 11      | 11-A | 100    | Bozic | Inf | last   | singleC     | S1:OT, S1:OT-A                                                                                       |
| 104 | Yes         | 11      | 11-A | 100    | Bozic | Inf | last   | wholeT_0.01 | S1:OT, S1:OT-A, S5:CBN-A, S5:OT, S5:OT-A                                                             |
| 105 | Yes         | 11      | 11-A | 100    | Bozic | Inf | last   | wholeT_0.5  | S1:CBN, S1:CBN-A, S1:OT, S1:OT-A                                                                     |
| 106 | Yes         | 11      | 11-A | 100    | Bozic | Inf | unif   | singleC     | S1:CBN, S1:CBN-A, S1:OT, S1:OT-A                                                                     |
| 107 | Yes         | 11      | 11-A | 100    | Bozic | Inf | unif   | wholeT_0.01 | J1:CBN, J1:CBN-A, J1:OT, J1:OT-A, S1:CBN, S1:CBN-A, S1:OT, S1:OT-A, S5:CBN, S5:CBN-A, S5:OT, S5:OT-A |
| 108 | Yes         | 11      | 11-A | 100    | Bozic | Inf | unif   | wholeT_0.5  | S1:CBN, S1:CBN-A, S1:OT, S1:OT-A                                                                     |
| 109 | Yes         | 11      | 11-A | 100    | exp   | 0   | last   | singleC     | S1:OT, S1:OT-A                                                                                       |
| 110 | Yes         | 11      | 11-A | 100    | exp   | 0   | last   | wholeT_0.01 | S1:CBN, S1:CBN-A, S1:OT, S1:OT-A                                                                     |
| 111 | Yes         | 11      | 11-A | 100    | exp   | 0   | last   | wholeT_0.5  | S1:CBN-A, S1:OT, S1:OT-A                                                                             |
| 112 | Yes         | 11      | 11-A | 100    | exp   | 0   | unif   | singleC     | none                                                                                                 |
| 113 | Yes         | 11      | 11-A | 100    | exp   | 0   | unif   | wholeT_0.01 | S1:CBN, S1:CBN-A, S1:OT, S1:OT-A                                                                     |
| 114 | Yes         | 11      | 11-A | 100    | exp   | 0   | unif   | wholeT_0.5  | none                                                                                                 |
| 115 | Yes         | 11      | 11-A | 100    | exp   | Inf | last   | singleC     | S1:OT, S1:OT-A                                                                                       |
| 116 | Yes         | 11      | 11-A | 100    | exp   | Inf | last   | wholeT_0.01 | J1:CBN, J1:OT, J1:OT-A, S1:OT, S1:OT-A, S5:CBN-A, S5:OT, S5:OT-A                                     |
| 117 | Yes         | 11      | 11-A | 100    | exp   | Inf | last   | wholeT_0.5  | S1:CBN, S1:OT, S1:OT-A                                                                               |
| 118 | Yes         | 11      | 11-A | 100    | exp   | Inf | unif   | singleC     | S1:CBN, S1:OT, S1:OT-A                                                                               |
| 119 | Yes         | 11      | 11-A | 100    | exp   | Inf | unif   | wholeT_0.01 | J1:CBN, J1:CBN-A, S1:CBN, S1:CBN-A, S1:OT, S1:OT-A                                                   |
| 120 | Yes         | 11      | 11-A | 100    | exp   | Inf | unif   | wholeT_0.5  | S1:CBN, S1:CBN-A, S1:OT, S1:OT-A                                                                     |
| 121 | Yes         | 11      | 11-A | 100    | McF_4 | 0   | last   | singleC     | S1:CBN, S1:OT, S1:OT-A                                                                               |
| 122 | Yes         | 11      | 11-A | 100    | McF_4 | 0   | last   | wholeT_0.01 | S1:OT, S1:OT-A                                                                                       |
| 123 | Yes         | 11      | 11-A | 100    | McF_4 | 0   | last   | wholeT_0.5  | S1:OT, S1:OT-A                                                                                       |
| 124 | Yes         | 11      | 11-A | 100    | McF_4 | 0   | unif   | singleC     | S1:CBN, S1:CBN-A, S1:OT, S1:OT-A                                                                     |
| 125 | Yes         | 11      | 11-A | 100    | McF_4 | 0   | unif   | wholeT_0.01 | S1:CBN, S1:CBN-A, S1:OT, S1:OT-A                                                                     |

Table 7: (continued)

|     | Conjunction | Drivers | Tree | S.Size | Model | sh  | S.Time | S.Type      | Best method(s)                                                                                               |
|-----|-------------|---------|------|--------|-------|-----|--------|-------------|--------------------------------------------------------------------------------------------------------------|
| 126 | Yes         | 11      | 11-A | 100    | McF_4 | 0   | unif   | wholeT_0.5  | S1:CBN, S1:CBN-A, S1:OT, S1:OT-A                                                                             |
| 127 | Yes         | 11      | 11-A | 100    | McF_4 | Inf | last   | singleC     | S1:OT, S1:OT-A                                                                                               |
| 128 | Yes         | 11      | 11-A | 100    | McF_4 | Inf | last   | wholeT_0.01 | S1:OT, S1:OT-A, S5:OT, S5:OT-A                                                                               |
| 129 | Yes         | 11      | 11-A | 100    | McF_4 | Inf | last   | wholeT_0.5  | S1:OT, S1:OT-A                                                                                               |
| 130 | Yes         | 11      | 11-A | 100    | McF_4 | Inf | unif   | singleC     | S1:OT, S1:OT-A                                                                                               |
| 131 | Yes         | 11      | 11-A | 100    | McF_4 | Inf | unif   | wholeT_0.01 | S1:OT, S1:OT-A                                                                                               |
| 132 | Yes         | 11      | 11-A | 100    | McF_4 | Inf | unif   | wholeT_0.5  | S1:OT, S1:OT-A                                                                                               |
| 133 | Yes         | 11      | 11-A | 100    | McF_6 | 0   | last   | singleC     | S1:OT, S1:OT-A                                                                                               |
| 134 | Yes         | 11      | 11-A | 100    | McF_6 | 0   | last   | wholeT_0.01 | S1:OT, S1:OT-A, S5:OT, S5:OT-A                                                                               |
| 135 | Yes         | 11      | 11-A | 100    | McF_6 | 0   | last   | wholeT_0.5  | S1:OT, S1:OT-A                                                                                               |
| 136 | Yes         | 11      | 11-A | 100    | McF_6 | 0   | unif   | singleC     | S1:CBN, S1:CBN-A, S1:OT, S1:OT-A                                                                             |
| 137 | Yes         | 11      | 11-A | 100    | McF_6 | 0   | unif   | wholeT_0.01 | S1:CBN, S1:CBN-A, S1:OT, S1:OT-A                                                                             |
| 138 | Yes         | 11      | 11-A | 100    | McF_6 | 0   | unif   | wholeT_0.5  | S1:CBN, S1:OT, S1:OT-A                                                                                       |
| 139 | Yes         | 11      | 11-A | 100    | McF_6 | Inf | last   | singleC     | S1:OT, S1:OT-A, S5:OT, S5:OT-A                                                                               |
| 140 | Yes         | 11      | 11-A | 100    | McF_6 | Inf | last   | wholeT_0.01 | S1:OT, S1:OT-A, S5:OT, S5:OT-A                                                                               |
| 141 | Yes         | 11      | 11-A | 100    | McF_6 | Inf | last   | wholeT_0.5  | S1:OT, S1:OT-A                                                                                               |
| 142 | Yes         | 11      | 11-A | 100    | McF_6 | Inf | unif   | singleC     | S1:CBN, S1:OT, S1:OT-A                                                                                       |
| 143 | Yes         | 11      | 11-A | 100    | McF_6 | Inf | unif   | wholeT_0.01 | S1:CBN, S1:CBN-A, S1:OT, S1:OT-A                                                                             |
| 144 | Yes         | 11      | 11-A | 100    | McF_6 | Inf | unif   | wholeT_0.5  | S1:CBN, S1:CBN-A, S1:OT, S1:OT-A                                                                             |
| 145 | Yes         | 9       | 9-A  | 1000   | Bozic | 0   | last   | singleC     | S1:OT, S1:OT-A                                                                                               |
| 146 | Yes         | 9       | 9-A  | 1000   | Bozic | 0   | last   | wholeT_0.01 | S1:DiP, S1:DiP-A, S1:OT, S1:OT-A,<br>S5:DiP, S5:DiP-A, S5:OT, S5:OT-A                                        |
| 147 | Yes         | 9       | 9-A  | 1000   | Bozic | 0   | last   | wholeT_0.5  | S1:OT, S1:OT-A                                                                                               |
| 148 | Yes         | 9       | 9-A  | 1000   | Bozic | 0   | unif   | singleC     | none                                                                                                         |
| 149 | Yes         | 9       | 9-A  | 1000   | Bozic | 0   | unif   | wholeT_0.01 | S1:CBN, S1:CBN-A                                                                                             |
| 150 | Yes         | 9       | 9-A  | 1000   | Bozic | 0   | unif   | wholeT_0.5  | none                                                                                                         |
| 151 | Yes         | 9       | 9-A  | 1000   | Bozic | Inf | last   | singleC     | S1:CBN, S1:CBN-A, S1:OT, S1:OT-A,<br>S5:CBN-A                                                                |
| 152 | Yes         | 9       | 9-A  | 1000   | Bozic | Inf | last   | wholeT_0.01 | J1:CBN-A, S1:CBN, S1:CBN-A, S1:DiP-A,<br>S1:OT, S1:OT-A, S5:CBN, S5:CBN-A,<br>S5:DiP-A, S5:OT, S5:OT-A       |
| 153 | Yes         | 9       | 9-A  | 1000   | Bozic | Inf | last   | wholeT_0.5  | S1:CBN, S1:CBN-A, S1:OT, S1:OT-A                                                                             |
| 154 | Yes         | 9       | 9-A  | 1000   | Bozic | Inf | unif   | singleC     | S1:CBN, S1:CBN-A, S1:OT, S1:OT-A                                                                             |
| 155 | Yes         | 9       | 9-A  | 1000   | Bozic | Inf | unif   | wholeT_0.01 | S1:CBN, S1:CBN-A, S1:DiP, S1:DiP-A,<br>S1:OT, S1:OT-A, S5:CBN, S5:CBN-A,<br>S5:DiP, S5:DiP-A, S5:OT, S5:OT-A |
| 156 | Yes         | 9       | 9-A  | 1000   | Bozic | Inf | unif   | wholeT_0.5  | S1:CBN, S1:CBN-A, S1:OT, S1:OT-A                                                                             |
| 157 | Yes         | 9       | 9-A  | 1000   | exp   | 0   | last   | singleC     | S1:CBN, S1:CBN-A, S1:DiP, S1:DiP-A,<br>S1:OT, S1:OT-A                                                        |
| 158 | Yes         | 9       | 9-A  | 1000   | exp   | 0   | last   | wholeT_0.01 | S1:CBN-A, S1:DiP-A, S1:OT, S1:OT-A                                                                           |

Table 7: (continued)

|     | Conjunction | Drivers | Tree | S.Size | Model | sh  | S.Time | S.Type      | Best method(s)                                                                                         |
|-----|-------------|---------|------|--------|-------|-----|--------|-------------|--------------------------------------------------------------------------------------------------------|
| 159 | Yes         | 9       | 9-A  | 1000   | exp   | 0   | last   | wholeT_0.5  | none                                                                                                   |
| 160 | Yes         | 9       | 9-A  | 1000   | exp   | 0   | unif   | singleC     | none                                                                                                   |
| 161 | Yes         | 9       | 9-A  | 1000   | exp   | 0   | unif   | wholeT_0.01 | S1:CBN, S1:CBN-A, S1:DiP, S1:DiP-A, S1:OT, S1:OT-A                                                     |
| 162 | Yes         | 9       | 9-A  | 1000   | exp   | 0   | unif   | wholeT_0.5  | none                                                                                                   |
| 163 | Yes         | 9       | 9-A  | 1000   | exp   | Inf | last   | singleC     | S1:CBN, S1:CBN-A, S1:OT, S1:OT-A                                                                       |
| 164 | Yes         | 9       | 9-A  | 1000   | exp   | Inf | last   | wholeT_0.01 | S1:CBN, S1:CBN-A, S1:DiP, S1:DiP-A, S1:OT, S1:OT-A, S5:CBN, S5:CBN-A, S5:DiP, S5:DiP-A, S5:OT, S5:OT-A |
| 165 | Yes         | 9       | 9-A  | 1000   | exp   | Inf | last   | wholeT_0.5  | S1:CBN, S1:CBN-A, S1:OT, S1:OT-A                                                                       |
| 166 | Yes         | 9       | 9-A  | 1000   | exp   | Inf | unif   | singleC     | S1:CBN, S1:CBN-A, S1:OT, S1:OT-A                                                                       |
| 167 | Yes         | 9       | 9-A  | 1000   | exp   | Inf | unif   | wholeT_0.01 | S1:CBN, S1:CBN-A, S1:OT, S1:OT-A                                                                       |
| 168 | Yes         | 9       | 9-A  | 1000   | exp   | Inf | unif   | wholeT_0.5  | S1:CBN-A, S1:OT, S1:OT-A                                                                               |
| 169 | Yes         | 9       | 9-A  | 1000   | McF_4 | 0   | last   | singleC     | S1:CBN, S1:DiP, S1:DiP-A, S1:OT, S1:OT-A                                                               |
| 170 | Yes         | 9       | 9-A  | 1000   | McF_4 | 0   | last   | wholeT_0.01 | S1:CBN, S1:CBN-A, S1:DiP, S1:DiP-A, S1:OT, S1:OT-A                                                     |
| 171 | Yes         | 9       | 9-A  | 1000   | McF_4 | 0   | last   | wholeT_0.5  | S1:DiP, S1:DiP-A, S1:OT, S1:OT-A                                                                       |
| 172 | Yes         | 9       | 9-A  | 1000   | McF_4 | 0   | unif   | singleC     | S1:CBN, S1:CBN-A, S1:DiP, S1:DiP-A, S1:OT, S1:OT-A                                                     |
| 173 | Yes         | 9       | 9-A  | 1000   | McF_4 | 0   | unif   | wholeT_0.01 | S1:CBN, S1:CBN-A, S1:DiP-A, S1:OT-A                                                                    |
| 174 | Yes         | 9       | 9-A  | 1000   | McF_4 | 0   | unif   | wholeT_0.5  | S1:CBN, S1:CBN-A, S1:DiP, S1:DiP-A, S1:OT, S1:OT-A                                                     |
| 175 | Yes         | 9       | 9-A  | 1000   | McF_4 | Inf | last   | singleC     | S1:OT, S1:OT-A                                                                                         |
| 176 | Yes         | 9       | 9-A  | 1000   | McF_4 | Inf | last   | wholeT_0.01 | S1:OT-A                                                                                                |
| 177 | Yes         | 9       | 9-A  | 1000   | McF_4 | Inf | last   | wholeT_0.5  | S1:CBN, S1:DiP, S1:DiP-A, S1:OT, S1:OT-A                                                               |
| 178 | Yes         | 9       | 9-A  | 1000   | McF_4 | Inf | unif   | singleC     | S1:CBN, S1:CBN-A, S1:OT, S1:OT-A                                                                       |
| 179 | Yes         | 9       | 9-A  | 1000   | McF_4 | Inf | unif   | wholeT_0.01 | S1:CBN, S1:CBN-A, S1:OT, S1:OT-A                                                                       |
| 180 | Yes         | 9       | 9-A  | 1000   | McF_4 | Inf | unif   | wholeT_0.5  | S1:CBN, S1:CBN-A, S1:OT, S1:OT-A                                                                       |
| 181 | Yes         | 9       | 9-A  | 1000   | McF_6 | 0   | last   | singleC     | S1:OT-A                                                                                                |
| 182 | Yes         | 9       | 9-A  | 1000   | McF_6 | 0   | last   | wholeT_0.01 | S1:DiP-A, S5:DiP-A                                                                                     |
| 183 | Yes         | 9       | 9-A  | 1000   | McF_6 | 0   | last   | wholeT_0.5  | S1:DiP-A, S1:OT-A, S5:DiP-A, S5:OT-A                                                                   |
| 184 | Yes         | 9       | 9-A  | 1000   | McF_6 | 0   | unif   | singleC     | S1:CBN, S1:CBN-A, S1:DiP, S1:DiP-A                                                                     |
| 185 | Yes         | 9       | 9-A  | 1000   | McF_6 | 0   | unif   | wholeT_0.01 | S1:CBN, S1:CBN-A, S1:DiP, S1:DiP-A                                                                     |
| 186 | Yes         | 9       | 9-A  | 1000   | McF_6 | 0   | unif   | wholeT_0.5  | S1:CBN, S1:CBN-A, S1:DiP, S1:DiP-A                                                                     |
| 187 | Yes         | 9       | 9-A  | 1000   | McF_6 | Inf | last   | singleC     | S1:DiP-A, S1:OT-A, S5:DiP-A, S5:OT-A                                                                   |
| 188 | Yes         | 9       | 9-A  | 1000   | McF_6 | Inf | last   | wholeT_0.01 | S1:OT-A, S5:OT-A                                                                                       |
| 189 | Yes         | 9       | 9-A  | 1000   | McF_6 | Inf | last   | wholeT_0.5  | S1:DiP-A, S1:OT-A, S5:DiP-A, S5:OT-A                                                                   |
| 190 | Yes         | 9       | 9-A  | 1000   | McF_6 | Inf | unif   | singleC     | S1:CBN, S1:CBN-A                                                                                       |

Table 7: (continued)

|     | Conjunction | Drivers | Tree | S.Size | Model | sh  | S.Time | S.Type      | Best method(s)                                                                       |
|-----|-------------|---------|------|--------|-------|-----|--------|-------------|--------------------------------------------------------------------------------------|
| 191 | Yes         | 9       | 9-A  | 1000   | McF_6 | Inf | unif   | wholeT_0.01 | S1:CBN, S1:CBN-A, S1:DiP, S1:DiP-A, S1:OT, S1:OT-A                                   |
| 192 | Yes         | 9       | 9-A  | 1000   | McF_6 | Inf | unif   | wholeT_0.5  | S1:CBN, S1:CBN-A                                                                     |
| 193 | Yes         | 9       | 9-A  | 200    | Bozic | 0   | last   | singleC     | S1:CBN, S1:CBN-A, S1:OT, S1:OT-A                                                     |
| 194 | Yes         | 9       | 9-A  | 200    | Bozic | 0   | last   | wholeT_0.01 | S1:CBN, S1:CBN-A, S1:OT, S1:OT-A                                                     |
| 195 | Yes         | 9       | 9-A  | 200    | Bozic | 0   | last   | wholeT_0.5  | S1:OT, S1:OT-A                                                                       |
| 196 | Yes         | 9       | 9-A  | 200    | Bozic | 0   | unif   | singleC     | S1:CBN, S1:CBN-A, S1:OT, S1:OT-A                                                     |
| 197 | Yes         | 9       | 9-A  | 200    | Bozic | 0   | unif   | wholeT_0.01 | S1:CBN, S1:CBN-A, S1:OT-A                                                            |
| 198 | Yes         | 9       | 9-A  | 200    | Bozic | 0   | unif   | wholeT_0.5  | none                                                                                 |
| 199 | Yes         | 9       | 9-A  | 200    | Bozic | Inf | last   | singleC     | S1:CBN, S1:CBN-A, S1:OT, S1:OT-A                                                     |
| 200 | Yes         | 9       | 9-A  | 200    | Bozic | Inf | last   | wholeT_0.01 | S1:CBN, S1:CBN-A, S5:CBN, S5:CBN-A                                                   |
| 201 | Yes         | 9       | 9-A  | 200    | Bozic | Inf | last   | wholeT_0.5  | S1:CBN, S1:CBN-A, S1:OT, S1:OT-A                                                     |
| 202 | Yes         | 9       | 9-A  | 200    | Bozic | Inf | unif   | singleC     | S1:CBN, S1:CBN-A, S1:OT, S1:OT-A                                                     |
| 203 | Yes         | 9       | 9-A  | 200    | Bozic | Inf | unif   | wholeT_0.01 | J1:CBN, J1:CBN-A, S1:CBN, S1:CBN-A, S1:OT, S1:OT-A, S5:CBN, S5:CBN-A, S5:OT, S5:OT-A |
| 204 | Yes         | 9       | 9-A  | 200    | Bozic | Inf | unif   | wholeT_0.5  | S1:CBN, S1:CBN-A, S1:OT, S1:OT-A                                                     |
| 205 | Yes         | 9       | 9-A  | 200    | exp   | 0   | last   | singleC     | S1:OT, S1:OT-A                                                                       |
| 206 | Yes         | 9       | 9-A  | 200    | exp   | 0   | last   | wholeT_0.01 | S1:CBN-A, S1:OT, S1:OT-A                                                             |
| 207 | Yes         | 9       | 9-A  | 200    | exp   | 0   | last   | wholeT_0.5  | S1:CBN, S1:OT, S1:OT-A                                                               |
| 208 | Yes         | 9       | 9-A  | 200    | exp   | 0   | unif   | singleC     | none                                                                                 |
| 209 | Yes         | 9       | 9-A  | 200    | exp   | 0   | unif   | wholeT_0.01 | S1:CBN-A, S1:OT, S1:OT-A                                                             |
| 210 | Yes         | 9       | 9-A  | 200    | exp   | 0   | unif   | wholeT_0.5  | none                                                                                 |
| 211 | Yes         | 9       | 9-A  | 200    | exp   | Inf | last   | singleC     | S1:CBN, S1:CBN-A, S1:OT, S1:OT-A                                                     |
| 212 | Yes         | 9       | 9-A  | 200    | exp   | Inf | last   | wholeT_0.01 | S1:CBN, S1:CBN-A, S5:CBN, S5:CBN-A                                                   |
| 213 | Yes         | 9       | 9-A  | 200    | exp   | Inf | last   | wholeT_0.5  | S1:CBN, S1:CBN-A, S1:OT, S1:OT-A                                                     |
| 214 | Yes         | 9       | 9-A  | 200    | exp   | Inf | unif   | singleC     | S1:CBN, S1:CBN-A, S1:OT, S1:OT-A                                                     |
| 215 | Yes         | 9       | 9-A  | 200    | exp   | Inf | unif   | wholeT_0.01 | S1:CBN, S1:CBN-A                                                                     |
| 216 | Yes         | 9       | 9-A  | 200    | exp   | Inf | unif   | wholeT_0.5  | S1:CBN, S1:CBN-A, S1:OT, S1:OT-A                                                     |
| 217 | Yes         | 9       | 9-A  | 200    | McF_4 | 0   | last   | singleC     | S1:CBN, S1:CBN-A, S1:OT, S1:OT-A                                                     |
| 218 | Yes         | 9       | 9-A  | 200    | McF_4 | 0   | last   | wholeT_0.01 | S1:CBN, S1:CBN-A, S1:OT, S1:OT-A                                                     |
| 219 | Yes         | 9       | 9-A  | 200    | McF_4 | 0   | last   | wholeT_0.5  | S1:CBN, S1:CBN-A, S1:OT, S1:OT-A                                                     |
| 220 | Yes         | 9       | 9-A  | 200    | McF_4 | 0   | unif   | singleC     | S1:CBN, S1:CBN-A, S1:OT, S1:OT-A                                                     |
| 221 | Yes         | 9       | 9-A  | 200    | McF_4 | 0   | unif   | wholeT_0.01 | S1:CBN, S1:CBN-A                                                                     |
| 222 | Yes         | 9       | 9-A  | 200    | McF_4 | 0   | unif   | wholeT_0.5  | S1:CBN, S1:CBN-A, S1:OT, S1:OT-A                                                     |
| 223 | Yes         | 9       | 9-A  | 200    | McF_4 | Inf | last   | singleC     | S1:CBN-A, S1:OT, S1:OT-A                                                             |
| 224 | Yes         | 9       | 9-A  | 200    | McF_4 | Inf | last   | wholeT_0.01 | S1:OT-A                                                                              |
| 225 | Yes         | 9       | 9-A  | 200    | McF_4 | Inf | last   | wholeT_0.5  | S1:CBN, S1:CBN-A, S1:OT, S1:OT-A                                                     |
| 226 | Yes         | 9       | 9-A  | 200    | McF_4 | Inf | unif   | singleC     | S1:CBN, S1:CBN-A, S1:OT, S1:OT-A                                                     |
| 227 | Yes         | 9       | 9-A  | 200    | McF_4 | Inf | unif   | wholeT_0.01 | S1:CBN, S1:CBN-A, S1:OT, S1:OT-A                                                     |

Table 7: (continued)

|     | Conjunction | Drivers | Tree | S.Size | Model | sh  | S.Time | S.Type      | Best method(s)                                                                       |
|-----|-------------|---------|------|--------|-------|-----|--------|-------------|--------------------------------------------------------------------------------------|
| 228 | Yes         | 9       | 9-A  | 200    | McF_4 | Inf | unif   | wholeT_0.5  | S1:CBN, S1:CBN-A, S1:OT, S1:OT-A                                                     |
| 229 | Yes         | 9       | 9-A  | 200    | McF_6 | 0   | last   | singleC     | S1:OT-A, S5:OT-A                                                                     |
| 230 | Yes         | 9       | 9-A  | 200    | McF_6 | 0   | last   | wholeT_0.01 | S1:OT-A, S5:OT-A                                                                     |
| 231 | Yes         | 9       | 9-A  | 200    | McF_6 | 0   | last   | wholeT_0.5  | S1:OT-A, S5:OT-A                                                                     |
| 232 | Yes         | 9       | 9-A  | 200    | McF_6 | 0   | unif   | singleC     | S1:CBN, S1:CBN-A, S1:OT, S1:OT-A                                                     |
| 233 | Yes         | 9       | 9-A  | 200    | McF_6 | 0   | unif   | wholeT_0.01 | S1:CBN, S1:CBN-A                                                                     |
| 234 | Yes         | 9       | 9-A  | 200    | McF_6 | 0   | unif   | wholeT_0.5  | S1:CBN, S1:CBN-A                                                                     |
| 235 | Yes         | 9       | 9-A  | 200    | McF_6 | Inf | last   | singleC     | S1:OT-A, S5:OT-A                                                                     |
| 236 | Yes         | 9       | 9-A  | 200    | McF_6 | Inf | last   | wholeT_0.01 | S1:OT-A, S5:OT-A                                                                     |
| 237 | Yes         | 9       | 9-A  | 200    | McF_6 | Inf | last   | wholeT_0.5  | S1:OT-A, S5:OT-A                                                                     |
| 238 | Yes         | 9       | 9-A  | 200    | McF_6 | Inf | unif   | singleC     | S1:CBN, S1:CBN-A                                                                     |
| 239 | Yes         | 9       | 9-A  | 200    | McF_6 | Inf | unif   | wholeT_0.01 | S1:CBN, S1:CBN-A, S1:OT, S1:OT-A, S5:CBN-A                                           |
| 240 | Yes         | 9       | 9-A  | 200    | McF_6 | Inf | unif   | wholeT_0.5  | S1:CBN, S1:CBN-A, S1:OT, S1:OT-A                                                     |
| 241 | Yes         | 9       | 9-A  | 100    | Bozic | 0   | last   | singleC     | S1:CBN, S1:CBN-A, S1:OT, S1:OT-A                                                     |
| 242 | Yes         | 9       | 9-A  | 100    | Bozic | 0   | last   | wholeT_0.01 | S1:CBN, S1:CBN-A, S1:OT, S1:OT-A                                                     |
| 243 | Yes         | 9       | 9-A  | 100    | Bozic | 0   | last   | wholeT_0.5  | S1:CBN, S1:CBN-A, S1:OT, S1:OT-A                                                     |
| 244 | Yes         | 9       | 9-A  | 100    | Bozic | 0   | unif   | singleC     | S1:CBN, S1:CBN-A, S1:OT, S1:OT-A                                                     |
| 245 | Yes         | 9       | 9-A  | 100    | Bozic | 0   | unif   | wholeT_0.01 | S1:CBN, S1:CBN-A                                                                     |
| 246 | Yes         | 9       | 9-A  | 100    | Bozic | 0   | unif   | wholeT_0.5  | S1:CBN, S1:CBN-A, S1:OT, S1:OT-A                                                     |
| 247 | Yes         | 9       | 9-A  | 100    | Bozic | Inf | last   | singleC     | S1:CBN, S1:CBN-A, S1:OT, S1:OT-A                                                     |
| 248 | Yes         | 9       | 9-A  | 100    | Bozic | Inf | last   | wholeT_0.01 | J1:CBN, J1:CBN-A, S1:CBN, S1:CBN-A, S1:OT, S1:OT-A, S5:CBN, S5:CBN-A, S5:OT, S5:OT-A |
| 249 | Yes         | 9       | 9-A  | 100    | Bozic | Inf | last   | wholeT_0.5  | S1:CBN, S1:CBN-A, S1:OT, S1:OT-A, S5:CBN-A, S5:OT, S5:OT-A                           |
| 250 | Yes         | 9       | 9-A  | 100    | Bozic | Inf | unif   | singleC     | S1:CBN, S1:CBN-A, S1:OT, S1:OT-A                                                     |
| 251 | Yes         | 9       | 9-A  | 100    | Bozic | Inf | unif   | wholeT_0.01 | S1:CBN, S1:CBN-A, S1:OT, S1:OT-A, S5:CBN-A                                           |
| 252 | Yes         | 9       | 9-A  | 100    | Bozic | Inf | unif   | wholeT_0.5  | S1:CBN, S1:CBN-A, S1:OT, S1:OT-A                                                     |
| 253 | Yes         | 9       | 9-A  | 100    | exp   | 0   | last   | singleC     | S1:CBN-A, S1:OT, S1:OT-A                                                             |
| 254 | Yes         | 9       | 9-A  | 100    | exp   | 0   | last   | wholeT_0.01 | S1:CBN-A, S1:OT, S1:OT-A                                                             |
| 255 | Yes         | 9       | 9-A  | 100    | exp   | 0   | last   | wholeT_0.5  | S1:OT, S1:OT-A                                                                       |
| 256 | Yes         | 9       | 9-A  | 100    | exp   | 0   | unif   | singleC     | none                                                                                 |
| 257 | Yes         | 9       | 9-A  | 100    | exp   | 0   | unif   | wholeT_0.01 | S1:CBN, S1:CBN-A, S1:OT, S1:OT-A                                                     |
| 258 | Yes         | 9       | 9-A  | 100    | exp   | 0   | unif   | wholeT_0.5  | none                                                                                 |
| 259 | Yes         | 9       | 9-A  | 100    | exp   | Inf | last   | singleC     | S1:CBN, S1:CBN-A, S1:OT, S1:OT-A                                                     |
| 260 | Yes         | 9       | 9-A  | 100    | exp   | Inf | last   | wholeT_0.01 | S1:CBN, S1:CBN-A, S1:OT, S1:OT-A, S5:CBN, S5:CBN-A, S5:OT, S5:OT-A                   |
| 261 | Yes         | 9       | 9-A  | 100    | exp   | Inf | last   | wholeT_0.5  | S1:CBN, S1:CBN-A                                                                     |

Table 7: (continued)

|     | Conjunction | Drivers | Tree | S.Size | Model | sh  | S.Time | S.Type      | Best method(s)                                                                               |
|-----|-------------|---------|------|--------|-------|-----|--------|-------------|----------------------------------------------------------------------------------------------|
| 262 | Yes         | 9       | 9-A  | 100    | exp   | Inf | unif   | singleC     | S1:CBN, S1:CBN-A, S1:OT, S1:OT-A                                                             |
| 263 | Yes         | 9       | 9-A  | 100    | exp   | Inf | unif   | wholeT_0.01 | S1:CBN, S1:CBN-A                                                                             |
| 264 | Yes         | 9       | 9-A  | 100    | exp   | Inf | unif   | wholeT_0.5  | S1:CBN, S1:CBN-A, S1:OT, S1:OT-A                                                             |
| 265 | Yes         | 9       | 9-A  | 100    | McF_4 | 0   | last   | singleC     | S1:CBN, S1:CBN-A, S1:OT, S1:OT-A                                                             |
| 266 | Yes         | 9       | 9-A  | 100    | McF_4 | 0   | last   | wholeT_0.01 | S1:CBN, S1:CBN-A, S1:OT, S1:OT-A                                                             |
| 267 | Yes         | 9       | 9-A  | 100    | McF_4 | 0   | last   | wholeT_0.5  | S1:CBN, S1:CBN-A, S1:OT, S1:OT-A                                                             |
| 268 | Yes         | 9       | 9-A  | 100    | McF_4 | 0   | unif   | singleC     | S1:CBN, S1:CBN-A, S1:OT, S1:OT-A                                                             |
| 269 | Yes         | 9       | 9-A  | 100    | McF_4 | 0   | unif   | wholeT_0.01 | S1:CBN, S1:CBN-A                                                                             |
| 270 | Yes         | 9       | 9-A  | 100    | McF_4 | 0   | unif   | wholeT_0.5  | S1:CBN, S1:CBN-A, S1:OT, S1:OT-A                                                             |
| 271 | Yes         | 9       | 9-A  | 100    | McF_4 | Inf | last   | singleC     | S1:CBN, S1:CBN-A, S1:OT, S1:OT-A                                                             |
| 272 | Yes         | 9       | 9-A  | 100    | McF_4 | Inf | last   | wholeT_0.01 | S1:OT-A                                                                                      |
| 273 | Yes         | 9       | 9-A  | 100    | McF_4 | Inf | last   | wholeT_0.5  | S1:CBN, S1:CBN-A, S1:OT, S1:OT-A                                                             |
| 274 | Yes         | 9       | 9-A  | 100    | McF_4 | Inf | unif   | singleC     | S1:CBN, S1:CBN-A, S1:OT, S1:OT-A                                                             |
| 275 | Yes         | 9       | 9-A  | 100    | McF_4 | Inf | unif   | wholeT_0.01 | S1:CBN, S1:CBN-A, S1:OT, S1:OT-A                                                             |
| 276 | Yes         | 9       | 9-A  | 100    | McF_4 | Inf | unif   | wholeT_0.5  | S1:CBN, S1:CBN-A, S1:OT, S1:OT-A                                                             |
| 277 | Yes         | 9       | 9-A  | 100    | McF_6 | 0   | last   | singleC     | S1:OT-A                                                                                      |
| 278 | Yes         | 9       | 9-A  | 100    | McF_6 | 0   | last   | wholeT_0.01 | S1:OT-A, S5:OT-A                                                                             |
| 279 | Yes         | 9       | 9-A  | 100    | McF_6 | 0   | last   | wholeT_0.5  | S1:OT-A                                                                                      |
| 280 | Yes         | 9       | 9-A  | 100    | McF_6 | 0   | unif   | singleC     | S1:CBN, S1:CBN-A                                                                             |
| 281 | Yes         | 9       | 9-A  | 100    | McF_6 | 0   | unif   | wholeT_0.01 | S1:CBN, S1:CBN-A                                                                             |
| 282 | Yes         | 9       | 9-A  | 100    | McF_6 | 0   | unif   | wholeT_0.5  | S1:CBN, S1:CBN-A                                                                             |
| 283 | Yes         | 9       | 9-A  | 100    | McF_6 | Inf | last   | singleC     | S1:OT-A, S5:OT-A                                                                             |
| 284 | Yes         | 9       | 9-A  | 100    | McF_6 | Inf | last   | wholeT_0.01 | S1:OT-A, S5:OT-A                                                                             |
| 285 | Yes         | 9       | 9-A  | 100    | McF_6 | Inf | last   | wholeT_0.5  | S1:OT-A, S5:OT-A                                                                             |
| 286 | Yes         | 9       | 9-A  | 100    | McF_6 | Inf | unif   | singleC     | S1:CBN, S1:CBN-A                                                                             |
| 287 | Yes         | 9       | 9-A  | 100    | McF_6 | Inf | unif   | wholeT_0.01 | S1:CBN, S1:CBN-A                                                                             |
| 288 | Yes         | 9       | 9-A  | 100    | McF_6 | Inf | unif   | wholeT_0.5  | S1:CBN, S1:CBN-A                                                                             |
| 289 | Yes         | 7       | 7-A  | 1000   | Bozic | 0   | last   | singleC     | S1:OT-A, S5:OT-A                                                                             |
| 290 | Yes         | 7       | 7-A  | 1000   | Bozic | 0   | last   | wholeT_0.01 | J1:DiP-A, J1:OT-A, J5:DiP-A, J5:OT-A,<br>S1:DiP-A, S1:OT-A, S5:DiP-A, S5:OT-A                |
| 291 | Yes         | 7       | 7-A  | 1000   | Bozic | 0   | last   | wholeT_0.5  | S1:OT-A                                                                                      |
| 292 | Yes         | 7       | 7-A  | 1000   | Bozic | 0   | unif   | singleC     | S1:CBN-A, S1:OT, S1:OT-A                                                                     |
| 293 | Yes         | 7       | 7-A  | 1000   | Bozic | 0   | unif   | wholeT_0.01 | S1:CBN, S1:CBN-A, S1:DiP, S1:DiP-A                                                           |
| 294 | Yes         | 7       | 7-A  | 1000   | Bozic | 0   | unif   | wholeT_0.5  | J1:CBN, J1:CBN-A, J1:DiP-A, J1:OT,<br>J1:OT-A, S1:CBN, S1:CBN-A, S1:DiP-A,<br>S1:OT, S1:OT-A |
| 295 | Yes         | 7       | 7-A  | 1000   | Bozic | Inf | last   | singleC     | J1:DiP-A, J1:OT-A, J5:DiP-A, J5:OT-A,<br>S1:DiP-A, S1:OT-A, S5:DiP-A, S5:OT-A                |
| 296 | Yes         | 7       | 7-A  | 1000   | Bozic | Inf | last   | wholeT_0.01 | J1:DiP-A, J1:OT-A, J5:DiP-A, J5:OT-A,<br>S1:DiP-A, S1:OT-A, S5:DiP-A, S5:OT-A                |



Table 7: (continued)

|     | Conjunction | Drivers | Tree | S.Size | Model | sh  | S.Time | S.Type      | Best method(s)                                                                                                                                                                 |
|-----|-------------|---------|------|--------|-------|-----|--------|-------------|--------------------------------------------------------------------------------------------------------------------------------------------------------------------------------|
| 297 | Yes         | 7       | 7-A  | 1000   | Bozic | Inf | last   | wholeT_0.5  | J1:DiP-A, J1:OT-A, J5:DiP-A, J5:OT-A, S1:DiP-A, S1:OT-A, S5:DiP-A, S5:OT-A                                                                                                     |
| 298 | Yes         | 7       | 7-A  | 1000   | Bozic | Inf | unif   | singleC     | S1:CBN, S1:CBN-A, S1:OT, S1:OT-A                                                                                                                                               |
| 299 | Yes         | 7       | 7-A  | 1000   | Bozic | Inf | unif   | wholeT_0.01 | J1:CBN, J1:CBN-A, J1:DiP-A, J1:OT, J1:OT-A, J5:CBN, J5:CBN-A, J5:DiP-A, J5:OT, J5:OT-A, S1:CBN, S1:CBN-A, S1:DiP-A, S1:OT, S1:OT-A, S5:CBN, S5:CBN-A, S5:DiP-A, S5:OT, S5:OT-A |
| 300 | Yes         | 7       | 7-A  | 1000   | Bozic | Inf | unif   | wholeT_0.5  | S1:CBN, S1:CBN-A, S1:OT, S1:OT-A                                                                                                                                               |
| 301 | Yes         | 7       | 7-A  | 1000   | exp   | 0   | last   | singleC     | S1:OT-A                                                                                                                                                                        |
| 302 | Yes         | 7       | 7-A  | 1000   | exp   | 0   | last   | wholeT_0.01 | J1:OT-A, S1:OT-A, S5:OT-A                                                                                                                                                      |
| 303 | Yes         | 7       | 7-A  | 1000   | exp   | 0   | last   | wholeT_0.5  | S1:OT-A                                                                                                                                                                        |
| 304 | Yes         | 7       | 7-A  | 1000   | exp   | 0   | unif   | singleC     | none                                                                                                                                                                           |
| 305 | Yes         | 7       | 7-A  | 1000   | exp   | 0   | unif   | wholeT_0.01 | S1:CBN-A, S1:OT, S1:OT-A                                                                                                                                                       |
| 306 | Yes         | 7       | 7-A  | 1000   | exp   | 0   | unif   | wholeT_0.5  | none                                                                                                                                                                           |
| 307 | Yes         | 7       | 7-A  | 1000   | exp   | Inf | last   | singleC     | J1:OT-A, S1:OT-A, S5:OT-A                                                                                                                                                      |
| 308 | Yes         | 7       | 7-A  | 1000   | exp   | Inf | last   | wholeT_0.01 | J1:DiP-A, J1:OT-A, J5:DiP-A, J5:OT-A, S1:DiP-A, S1:OT-A, S5:DiP-A, S5:OT-A                                                                                                     |
| 309 | Yes         | 7       | 7-A  | 1000   | exp   | Inf | last   | wholeT_0.5  | J1:OT-A, S1:OT-A, S5:OT-A                                                                                                                                                      |
| 310 | Yes         | 7       | 7-A  | 1000   | exp   | Inf | unif   | singleC     | S1:CBN, S1:CBN-A, S1:OT, S1:OT-A                                                                                                                                               |
| 311 | Yes         | 7       | 7-A  | 1000   | exp   | Inf | unif   | wholeT_0.01 | J1:CBN, J1:CBN-A, J1:OT, J1:OT-A, J5:CBN, J5:CBN-A, J5:OT, J5:OT-A, S1:CBN, S1:CBN-A, S1:OT, S1:OT-A, S5:CBN, S5:CBN-A, S5:OT, S5:OT-A                                         |
| 312 | Yes         | 7       | 7-A  | 1000   | exp   | Inf | unif   | wholeT_0.5  | S1:CBN-A, S1:OT, S1:OT-A                                                                                                                                                       |
| 313 | Yes         | 7       | 7-A  | 1000   | McF_4 | 0   | last   | singleC     | J1:DiP-A, J1:OT-A, J5:DiP-A, J5:OT-A, S1:DiP-A, S1:OT-A, S5:DiP-A, S5:OT-A                                                                                                     |
| 314 | Yes         | 7       | 7-A  | 1000   | McF_4 | 0   | last   | wholeT_0.01 | S1:OT-A                                                                                                                                                                        |
| 315 | Yes         | 7       | 7-A  | 1000   | McF_4 | 0   | last   | wholeT_0.5  | J1:DiP-A, J1:OT-A, J5:DiP-A, J5:OT-A, S1:DiP-A, S1:OT-A, S5:DiP-A, S5:OT-A                                                                                                     |
| 316 | Yes         | 7       | 7-A  | 1000   | McF_4 | 0   | unif   | singleC     | J1:DiP-A, J1:OT, J1:OT-A, S1:DiP-A, S1:OT, S1:OT-A, S5:DiP-A, S5:OT, S5:OT-A                                                                                                   |
| 317 | Yes         | 7       | 7-A  | 1000   | McF_4 | 0   | unif   | wholeT_0.01 | S1:CBN, S1:CBN-A, S1:DiP, S1:DiP-A, S1:OT, S1:OT-A                                                                                                                             |
| 318 | Yes         | 7       | 7-A  | 1000   | McF_4 | 0   | unif   | wholeT_0.5  | J1:DiP-A, J1:OT, J1:OT-A, S1:DiP-A, S1:OT, S1:OT-A, S5:DiP-A, S5:OT, S5:OT-A                                                                                                   |
| 319 | Yes         | 7       | 7-A  | 1000   | McF_4 | Inf | last   | singleC     | J1:DiP-A, J1:OT-A, J5:DiP-A, J5:OT-A, S1:DiP-A, S1:OT-A, S5:DiP-A, S5:OT-A                                                                                                     |

Table 7: (continued)

|     | Conjunction | Drivers | Tree | S.Size | Model | sh  | S.Time | S.Type      | Best method(s)                                                                                     |
|-----|-------------|---------|------|--------|-------|-----|--------|-------------|----------------------------------------------------------------------------------------------------|
| 320 | Yes         | 7       | 7-A  | 1000   | McF_4 | Inf | last   | wholeT_0.01 | S1:OT-A                                                                                            |
| 321 | Yes         | 7       | 7-A  | 1000   | McF_4 | Inf | last   | wholeT_0.5  | J1:DiP-A, J1:OT-A, J5:DiP-A, J5:OT-A,<br>S1:DiP-A, S1:OT-A, S5:DiP-A, S5:OT-A                      |
| 322 | Yes         | 7       | 7-A  | 1000   | McF_4 | Inf | unif   | singleC     | J1:DiP-A, J1:OT, J1:OT-A, S1:DiP-<br>A, S1:OT, S1:OT-A, S5:DiP-A, S5:OT,<br>S5:OT-A                |
| 323 | Yes         | 7       | 7-A  | 1000   | McF_4 | Inf | unif   | wholeT_0.01 | J1:DiP-A, J1:OT, J1:OT-A, J5:OT,<br>J5:OT-A, S1:DiP-A, S1:OT, S1:OT-A,<br>S5:DiP-A, S5:OT, S5:OT-A |
| 324 | Yes         | 7       | 7-A  | 1000   | McF_4 | Inf | unif   | wholeT_0.5  | J1:DiP-A, J1:OT, J1:OT-A, S1:DiP-<br>A, S1:OT, S1:OT-A, S5:DiP-A, S5:OT,<br>S5:OT-A                |
| 325 | Yes         | 7       | 7-A  | 1000   | McF_6 | 0   | last   | singleC     | S1:DiP-A, S5:DiP-A                                                                                 |
| 326 | Yes         | 7       | 7-A  | 1000   | McF_6 | 0   | last   | wholeT_0.01 | J1:DiP-A, J1:OT-A, S1:OT-A, S5:DiP-A,<br>S5:OT-A                                                   |
| 327 | Yes         | 7       | 7-A  | 1000   | McF_6 | 0   | last   | wholeT_0.5  | S1:DiP-A, S5:DiP-A                                                                                 |
| 328 | Yes         | 7       | 7-A  | 1000   | McF_6 | 0   | unif   | singleC     | S1:CBN-A                                                                                           |
| 329 | Yes         | 7       | 7-A  | 1000   | McF_6 | 0   | unif   | wholeT_0.01 | S1:CBN-A, S1:DiP, S1:DiP-A                                                                         |
| 330 | Yes         | 7       | 7-A  | 1000   | McF_6 | 0   | unif   | wholeT_0.5  | S1:CBN-A                                                                                           |
| 331 | Yes         | 7       | 7-A  | 1000   | McF_6 | Inf | last   | singleC     | S1:CBN-A, S1:DiP-A, S1:OT-A, S5:CBN-<br>A, S5:DiP-A, S5:OT-A                                       |
| 332 | Yes         | 7       | 7-A  | 1000   | McF_6 | Inf | last   | wholeT_0.01 | S5:DiP-A                                                                                           |
| 333 | Yes         | 7       | 7-A  | 1000   | McF_6 | Inf | last   | wholeT_0.5  | S1:CBN-A, S1:DiP-A, S5:CBN-A,<br>S5:DiP-A                                                          |
| 334 | Yes         | 7       | 7-A  | 1000   | McF_6 | Inf | unif   | singleC     | S1:CBN-A                                                                                           |
| 335 | Yes         | 7       | 7-A  | 1000   | McF_6 | Inf | unif   | wholeT_0.01 | S1:CBN-A                                                                                           |
| 336 | Yes         | 7       | 7-A  | 1000   | McF_6 | Inf | unif   | wholeT_0.5  | S1:CBN-A                                                                                           |
| 337 | Yes         | 7       | 7-A  | 200    | Bozic | 0   | last   | singleC     | S1:OT-A, S5:OT-A                                                                                   |
| 338 | Yes         | 7       | 7-A  | 200    | Bozic | 0   | last   | wholeT_0.01 | J1:OT-A, J5:OT-A, S1:OT-A, S5:OT-A                                                                 |
| 339 | Yes         | 7       | 7-A  | 200    | Bozic | 0   | last   | wholeT_0.5  | S1:OT-A                                                                                            |
| 340 | Yes         | 7       | 7-A  | 200    | Bozic | 0   | unif   | singleC     | S1:CBN, S1:CBN-A, S1:OT, S1:OT-A                                                                   |
| 341 | Yes         | 7       | 7-A  | 200    | Bozic | 0   | unif   | wholeT_0.01 | J1:OT, J1:OT-A, S1:CBN, S1:CBN-A,<br>S1:OT, S1:OT-A, S5:OT, S5:OT-A                                |
| 342 | Yes         | 7       | 7-A  | 200    | Bozic | 0   | unif   | wholeT_0.5  | S1:CBN, S1:CBN-A, S1:OT, S1:OT-A                                                                   |
| 343 | Yes         | 7       | 7-A  | 200    | Bozic | Inf | last   | singleC     | J1:OT-A, J5:OT-A, S1:OT-A, S5:OT-A                                                                 |
| 344 | Yes         | 7       | 7-A  | 200    | Bozic | Inf | last   | wholeT_0.01 | J1:OT-A, J5:OT-A, S1:OT-A, S5:OT-A                                                                 |
| 345 | Yes         | 7       | 7-A  | 200    | Bozic | Inf | last   | wholeT_0.5  | J1:OT-A, J5:OT-A, S1:OT-A, S5:OT-A                                                                 |
| 346 | Yes         | 7       | 7-A  | 200    | Bozic | Inf | unif   | singleC     | S1:CBN, S1:CBN-A, S1:OT, S1:OT-A                                                                   |

Table 7: (continued)

|     | Conjunction | Drivers | Tree | S.Size | Model | sh  | S.Time | S.Type      | Best method(s)                                                                                                                         |
|-----|-------------|---------|------|--------|-------|-----|--------|-------------|----------------------------------------------------------------------------------------------------------------------------------------|
| 347 | Yes         | 7       | 7-A  | 200    | Bozic | Inf | unif   | wholeT_0.01 | J1:CBN, J1:CBN-A, J1:OT, J1:OT-A, J5:CBN, J5:CBN-A, J5:OT, J5:OT-A, S1:CBN, S1:CBN-A, S1:OT, S1:OT-A, S5:CBN, S5:CBN-A, S5:OT, S5:OT-A |
| 348 | Yes         | 7       | 7-A  | 200    | Bozic | Inf | unif   | wholeT_0.5  | S1:CBN, S1:CBN-A, S1:OT, S1:OT-A                                                                                                       |
| 349 | Yes         | 7       | 7-A  | 200    | exp   | 0   | last   | singleC     | S1:OT-A                                                                                                                                |
| 350 | Yes         | 7       | 7-A  | 200    | exp   | 0   | last   | wholeT_0.01 | J1:OT-A, S1:OT-A, S5:OT-A                                                                                                              |
| 351 | Yes         | 7       | 7-A  | 200    | exp   | 0   | last   | wholeT_0.5  | S1:OT-A                                                                                                                                |
| 352 | Yes         | 7       | 7-A  | 200    | exp   | 0   | unif   | singleC     | none                                                                                                                                   |
| 353 | Yes         | 7       | 7-A  | 200    | exp   | 0   | unif   | wholeT_0.01 | S1:CBN, S1:CBN-A, S1:OT, S1:OT-A                                                                                                       |
| 354 | Yes         | 7       | 7-A  | 200    | exp   | 0   | unif   | wholeT_0.5  | none                                                                                                                                   |
| 355 | Yes         | 7       | 7-A  | 200    | exp   | Inf | last   | singleC     | J1:OT-A, S1:OT-A, S5:OT-A                                                                                                              |
| 356 | Yes         | 7       | 7-A  | 200    | exp   | Inf | last   | wholeT_0.01 | J1:OT-A, J5:OT-A, S1:OT-A, S5:OT-A                                                                                                     |
| 357 | Yes         | 7       | 7-A  | 200    | exp   | Inf | last   | wholeT_0.5  | S1:OT-A, S5:OT-A                                                                                                                       |
| 358 | Yes         | 7       | 7-A  | 200    | exp   | Inf | unif   | singleC     | S1:CBN, S1:CBN-A, S1:OT, S1:OT-A                                                                                                       |
| 359 | Yes         | 7       | 7-A  | 200    | exp   | Inf | unif   | wholeT_0.01 | J1:CBN, J1:CBN-A, J1:OT, J1:OT-A, J5:CBN, J5:CBN-A, J5:OT, J5:OT-A, S1:CBN, S1:CBN-A, S1:OT, S1:OT-A, S5:CBN, S5:CBN-A, S5:OT, S5:OT-A |
| 360 | Yes         | 7       | 7-A  | 200    | exp   | Inf | unif   | wholeT_0.5  | S1:OT, S1:OT-A                                                                                                                         |
| 361 | Yes         | 7       | 7-A  | 200    | McF_4 | 0   | last   | singleC     | J1:OT-A, J5:OT-A, S1:OT-A, S5:OT-A                                                                                                     |
| 362 | Yes         | 7       | 7-A  | 200    | McF_4 | 0   | last   | wholeT_0.01 | S1:OT-A                                                                                                                                |
| 363 | Yes         | 7       | 7-A  | 200    | McF_4 | 0   | last   | wholeT_0.5  | J1:OT-A, J5:OT-A, S1:OT-A, S5:OT-A                                                                                                     |
| 364 | Yes         | 7       | 7-A  | 200    | McF_4 | 0   | unif   | singleC     | J1:OT, J1:OT-A, S1:CBN-A, S1:OT, S1:OT-A, S5:OT, S5:OT-A                                                                               |
| 365 | Yes         | 7       | 7-A  | 200    | McF_4 | 0   | unif   | wholeT_0.01 | S1:OT, S1:OT-A                                                                                                                         |
| 366 | Yes         | 7       | 7-A  | 200    | McF_4 | 0   | unif   | wholeT_0.5  | J1:OT, J1:OT-A, S1:OT, S1:OT-A, S5:OT, S5:OT-A                                                                                         |
| 367 | Yes         | 7       | 7-A  | 200    | McF_4 | Inf | last   | singleC     | J1:OT-A, J5:OT-A, S1:OT-A, S5:OT-A                                                                                                     |
| 368 | Yes         | 7       | 7-A  | 200    | McF_4 | Inf | last   | wholeT_0.01 | S1:OT-A                                                                                                                                |
| 369 | Yes         | 7       | 7-A  | 200    | McF_4 | Inf | last   | wholeT_0.5  | J1:OT-A, J5:OT-A, S1:OT-A, S5:OT-A                                                                                                     |
| 370 | Yes         | 7       | 7-A  | 200    | McF_4 | Inf | unif   | singleC     | J1:OT, J1:OT-A, S1:OT, S1:OT-A, S5:OT, S5:OT-A                                                                                         |
| 371 | Yes         | 7       | 7-A  | 200    | McF_4 | Inf | unif   | wholeT_0.01 | J1:OT, J1:OT-A, S1:OT, S1:OT-A, S5:OT, S5:OT-A                                                                                         |
| 372 | Yes         | 7       | 7-A  | 200    | McF_4 | Inf | unif   | wholeT_0.5  | J1:OT, J1:OT-A, S1:OT, S1:OT-A, S5:OT, S5:OT-A                                                                                         |
| 373 | Yes         | 7       | 7-A  | 200    | McF_6 | 0   | last   | singleC     | S1:CBN, S1:OT-A, S5:CBN, S5:CBN-A, S5:OT-A                                                                                             |

Table 7: (continued)

|     | Conjunction | Drivers | Tree | S.Size | Model | sh  | S.Time | S.Type      | Best method(s)                                                                                                                         |
|-----|-------------|---------|------|--------|-------|-----|--------|-------------|----------------------------------------------------------------------------------------------------------------------------------------|
| 374 | Yes         | 7       | 7-A  | 200    | McF_6 | 0   | last   | wholeT_0.01 | J1:OT-A, J5:CBN-A, S1:DiP-A, S1:OT-A, S5:OT-A                                                                                          |
| 375 | Yes         | 7       | 7-A  | 200    | McF_6 | 0   | last   | wholeT_0.5  | S1:CBN, S1:CBN-A, S1:OT-A, S5:CBN, S5:CBN-A, S5:OT-A                                                                                   |
| 376 | Yes         | 7       | 7-A  | 200    | McF_6 | 0   | unif   | singleC     | S1:CBN-A                                                                                                                               |
| 377 | Yes         | 7       | 7-A  | 200    | McF_6 | 0   | unif   | wholeT_0.01 | S1:CBN-A, S1:OT, S1:OT-A                                                                                                               |
| 378 | Yes         | 7       | 7-A  | 200    | McF_6 | 0   | unif   | wholeT_0.5  | S1:CBN, S1:CBN-A, S1:OT, S1:OT-A                                                                                                       |
| 379 | Yes         | 7       | 7-A  | 200    | McF_6 | Inf | last   | singleC     | J1:CBN-A, S1:CBN, S1:CBN-A, S1:OT-A, S5:CBN-A, S5:OT-A                                                                                 |
| 380 | Yes         | 7       | 7-A  | 200    | McF_6 | Inf | last   | wholeT_0.01 | J5:CBN-A, S1:OT-A, S5:OT-A                                                                                                             |
| 381 | Yes         | 7       | 7-A  | 200    | McF_6 | Inf | last   | wholeT_0.5  | S1:CBN, S1:CBN-A, S1:OT-A, S5:CBN-A, S5:OT-A                                                                                           |
| 382 | Yes         | 7       | 7-A  | 200    | McF_6 | Inf | unif   | singleC     | S1:CBN-A                                                                                                                               |
| 383 | Yes         | 7       | 7-A  | 200    | McF_6 | Inf | unif   | wholeT_0.01 | S1:CBN-A                                                                                                                               |
| 384 | Yes         | 7       | 7-A  | 200    | McF_6 | Inf | unif   | wholeT_0.5  | S1:CBN, S1:CBN-A, S1:OT, S1:OT-A                                                                                                       |
| 385 | Yes         | 7       | 7-A  | 100    | Bozic | 0   | last   | singleC     | S1:OT-A                                                                                                                                |
| 386 | Yes         | 7       | 7-A  | 100    | Bozic | 0   | last   | wholeT_0.01 | J1:OT-A, J5:OT-A, S1:OT-A, S5:OT-A                                                                                                     |
| 387 | Yes         | 7       | 7-A  | 100    | Bozic | 0   | last   | wholeT_0.5  | S1:OT-A                                                                                                                                |
| 388 | Yes         | 7       | 7-A  | 100    | Bozic | 0   | unif   | singleC     | S1:CBN, S1:CBN-A, S1:OT, S1:OT-A                                                                                                       |
| 389 | Yes         | 7       | 7-A  | 100    | Bozic | 0   | unif   | wholeT_0.01 | S1:CBN, S1:CBN-A                                                                                                                       |
| 390 | Yes         | 7       | 7-A  | 100    | Bozic | 0   | unif   | wholeT_0.5  | S1:CBN, S1:CBN-A, S1:OT, S1:OT-A                                                                                                       |
| 391 | Yes         | 7       | 7-A  | 100    | Bozic | Inf | last   | singleC     | J1:OT-A, S1:OT-A, S5:OT-A                                                                                                              |
| 392 | Yes         | 7       | 7-A  | 100    | Bozic | Inf | last   | wholeT_0.01 | J1:OT-A, J5:OT-A, S1:OT-A, S5:OT-A                                                                                                     |
| 393 | Yes         | 7       | 7-A  | 100    | Bozic | Inf | last   | wholeT_0.5  | J1:OT-A, J5:OT-A, S1:OT-A, S5:OT-A                                                                                                     |
| 394 | Yes         | 7       | 7-A  | 100    | Bozic | Inf | unif   | singleC     | S1:CBN, S1:CBN-A, S1:OT, S1:OT-A                                                                                                       |
| 395 | Yes         | 7       | 7-A  | 100    | Bozic | Inf | unif   | wholeT_0.01 | J1:CBN, J1:CBN-A, J1:OT, J1:OT-A, J5:CBN, J5:CBN-A, J5:OT, J5:OT-A, S1:CBN, S1:CBN-A, S1:OT, S1:OT-A, S5:CBN, S5:CBN-A, S5:OT, S5:OT-A |
| 396 | Yes         | 7       | 7-A  | 100    | Bozic | Inf | unif   | wholeT_0.5  | S1:CBN, S1:CBN-A, S1:OT, S1:OT-A                                                                                                       |
| 397 | Yes         | 7       | 7-A  | 100    | exp   | 0   | last   | singleC     | S1:OT-A                                                                                                                                |
| 398 | Yes         | 7       | 7-A  | 100    | exp   | 0   | last   | wholeT_0.01 | S1:OT-A, S5:OT-A                                                                                                                       |
| 399 | Yes         | 7       | 7-A  | 100    | exp   | 0   | last   | wholeT_0.5  | S1:OT-A                                                                                                                                |
| 400 | Yes         | 7       | 7-A  | 100    | exp   | 0   | unif   | singleC     | J1:OT, J1:OT-A, S1:CBN, S1:CBN-A, S1:OT, S1:OT-A                                                                                       |
| 401 | Yes         | 7       | 7-A  | 100    | exp   | 0   | unif   | wholeT_0.01 | S1:CBN, S1:CBN-A, S1:OT, S1:OT-A                                                                                                       |
| 402 | Yes         | 7       | 7-A  | 100    | exp   | 0   | unif   | wholeT_0.5  | J1:CBN, J1:CBN-A, J1:OT, J1:OT-A, S1:CBN, S1:CBN-A, S1:OT, S1:OT-A                                                                     |
| 403 | Yes         | 7       | 7-A  | 100    | exp   | Inf | last   | singleC     | S1:OT-A, S5:OT-A                                                                                                                       |
| 404 | Yes         | 7       | 7-A  | 100    | exp   | Inf | last   | wholeT_0.01 | J1:OT-A, J5:OT-A, S1:OT-A, S5:OT-A                                                                                                     |

Table 7: (continued)

|     | Conjunction | Drivers | Tree | S.Size | Model | sh  | S.Time | S.Type      | Best method(s)                                                                                                                                  |
|-----|-------------|---------|------|--------|-------|-----|--------|-------------|-------------------------------------------------------------------------------------------------------------------------------------------------|
| 405 | Yes         | 7       | 7-A  | 100    | exp   | Inf | last   | wholeT_0.5  | S1:OT-A, S5:OT-A                                                                                                                                |
| 406 | Yes         | 7       | 7-A  | 100    | exp   | Inf | unif   | singleC     | S1:CBN, S1:OT, S1:OT-A                                                                                                                          |
| 407 | Yes         | 7       | 7-A  | 100    | exp   | Inf | unif   | wholeT_0.01 | J1:CBN, J1:CBN-A, J1:OT, J1:OT-A,<br>J5:CBN, J5:CBN-A, J5:OT, J5:OT-A,<br>S1:CBN, S1:CBN-A, S1:OT, S1:OT-A,<br>S5:CBN, S5:CBN-A, S5:OT, S5:OT-A |
| 408 | Yes         | 7       | 7-A  | 100    | exp   | Inf | unif   | wholeT_0.5  | S1:CBN, S1:CBN-A, S1:OT, S1:OT-A                                                                                                                |
| 409 | Yes         | 7       | 7-A  | 100    | McF_4 | 0   | last   | singleC     | S1:OT-A                                                                                                                                         |
| 410 | Yes         | 7       | 7-A  | 100    | McF_4 | 0   | last   | wholeT_0.01 | S1:OT-A                                                                                                                                         |
| 411 | Yes         | 7       | 7-A  | 100    | McF_4 | 0   | last   | wholeT_0.5  | S1:OT-A                                                                                                                                         |
| 412 | Yes         | 7       | 7-A  | 100    | McF_4 | 0   | unif   | singleC     | J1:OT, J1:OT-A, S1:CBN-A, S1:OT,<br>S1:OT-A, S5:OT, S5:OT-A                                                                                     |
| 413 | Yes         | 7       | 7-A  | 100    | McF_4 | 0   | unif   | wholeT_0.01 | S1:CBN-A, S1:OT, S1:OT-A                                                                                                                        |
| 414 | Yes         | 7       | 7-A  | 100    | McF_4 | 0   | unif   | wholeT_0.5  | J1:OT, J1:OT-A, S1:OT, S1:OT-A,<br>S5:OT, S5:OT-A                                                                                               |
| 415 | Yes         | 7       | 7-A  | 100    | McF_4 | Inf | last   | singleC     | J1:OT-A, J5:OT-A, S1:OT-A, S5:OT-A                                                                                                              |
| 416 | Yes         | 7       | 7-A  | 100    | McF_4 | Inf | last   | wholeT_0.01 | S1:OT-A                                                                                                                                         |
| 417 | Yes         | 7       | 7-A  | 100    | McF_4 | Inf | last   | wholeT_0.5  | J1:OT-A, J5:OT-A, S1:OT-A, S5:OT-A                                                                                                              |
| 418 | Yes         | 7       | 7-A  | 100    | McF_4 | Inf | unif   | singleC     | J1:OT, J1:OT-A, S1:OT, S1:OT-A,<br>S5:OT, S5:OT-A                                                                                               |
| 419 | Yes         | 7       | 7-A  | 100    | McF_4 | Inf | unif   | wholeT_0.01 | J1:OT, J1:OT-A, S1:OT, S1:OT-A,<br>S5:OT, S5:OT-A                                                                                               |
| 420 | Yes         | 7       | 7-A  | 100    | McF_4 | Inf | unif   | wholeT_0.5  | J1:OT, J1:OT-A, S1:OT, S1:OT-A,<br>S5:OT, S5:OT-A                                                                                               |
| 421 | Yes         | 7       | 7-A  | 100    | McF_6 | 0   | last   | singleC     | S1:CBN, S1:CBN-A, S1:OT-A, S5:CBN,<br>S5:CBN-A, S5:OT-A                                                                                         |
| 422 | Yes         | 7       | 7-A  | 100    | McF_6 | 0   | last   | wholeT_0.01 | S1:OT-A, S5:OT-A                                                                                                                                |
| 423 | Yes         | 7       | 7-A  | 100    | McF_6 | 0   | last   | wholeT_0.5  | S1:CBN, S1:CBN-A, S1:OT-A, S5:CBN,<br>S5:CBN-A, S5:OT-A                                                                                         |
| 424 | Yes         | 7       | 7-A  | 100    | McF_6 | 0   | unif   | singleC     | S1:CBN, S1:CBN-A, S1:OT, S1:OT-A                                                                                                                |
| 425 | Yes         | 7       | 7-A  | 100    | McF_6 | 0   | unif   | wholeT_0.01 | S1:CBN, S1:CBN-A, S1:OT, S1:OT-A,<br>S5:CBN-A                                                                                                   |
| 426 | Yes         | 7       | 7-A  | 100    | McF_6 | 0   | unif   | wholeT_0.5  | S1:CBN-A, S1:OT, S1:OT-A                                                                                                                        |
| 427 | Yes         | 7       | 7-A  | 100    | McF_6 | Inf | last   | singleC     | J1:CBN-A, S1:CBN, S1:CBN-A, S1:OT-<br>A, S5:CBN-A, S5:OT-A                                                                                      |
| 428 | Yes         | 7       | 7-A  | 100    | McF_6 | Inf | last   | wholeT_0.01 | J1:CBN-A, J5:CBN-A, S1:OT-A, S5:OT-<br>A                                                                                                        |
| 429 | Yes         | 7       | 7-A  | 100    | McF_6 | Inf | last   | wholeT_0.5  | S1:CBN, S1:CBN-A, S1:OT-A, S5:CBN,<br>S5:CBN-A, S5:OT-A                                                                                         |
| 430 | Yes         | 7       | 7-A  | 100    | McF_6 | Inf | unif   | singleC     | S1:CBN-A, S1:OT, S1:OT-A                                                                                                                        |

Table 7: (continued)

|     | Conjunction | Drivers | Tree | S.Size | Model | sh  | S.Time | S.Type      | Best method(s)                                                                                                          |
|-----|-------------|---------|------|--------|-------|-----|--------|-------------|-------------------------------------------------------------------------------------------------------------------------|
| 431 | Yes         | 7       | 7-A  | 100    | McF_6 | Inf | unif   | wholeT_0.01 | S1:CBN-A, S1:OT-A                                                                                                       |
| 432 | Yes         | 7       | 7-A  | 100    | McF_6 | Inf | unif   | wholeT_0.5  | S1:CBN-A, S1:OT-A                                                                                                       |
| 433 | No          | 11      | 11-B | 1000   | Bozic | 0   | last   | singleC     | S1:OT, S1:OT-A                                                                                                          |
| 434 | No          | 11      | 11-B | 1000   | Bozic | 0   | last   | wholeT_0.01 | S1:DiP, S1:DiP-A, S1:OT, S1:OT-A,<br>S5:DiP, S5:DiP-A, S5:OT, S5:OT-A                                                   |
| 435 | No          | 11      | 11-B | 1000   | Bozic | 0   | last   | wholeT_0.5  | S1:OT, S1:OT-A                                                                                                          |
| 436 | No          | 11      | 11-B | 1000   | Bozic | 0   | unif   | singleC     | none                                                                                                                    |
| 437 | No          | 11      | 11-B | 1000   | Bozic | 0   | unif   | wholeT_0.01 | S1:CBN, S1:CBN-A                                                                                                        |
| 438 | No          | 11      | 11-B | 1000   | Bozic | 0   | unif   | wholeT_0.5  | none                                                                                                                    |
| 439 | No          | 11      | 11-B | 1000   | Bozic | Inf | last   | singleC     | S1:OT, S1:OT-A                                                                                                          |
| 440 | No          | 11      | 11-B | 1000   | Bozic | Inf | last   | wholeT_0.01 | J1:DiP, J1:DiP-A, J1:OT, J1:OT-A,<br>S1:CBN-A, S1:DiP, S1:DiP-A, S1:OT,<br>S1:OT-A, S5:DiP, S5:DiP-A, S5:OT,<br>S5:OT-A |
| 441 | No          | 11      | 11-B | 1000   | Bozic | Inf | last   | wholeT_0.5  | S1:OT, S1:OT-A                                                                                                          |
| 442 | No          | 11      | 11-B | 1000   | Bozic | Inf | unif   | singleC     | S1:CBN-A, S1:DiP-A, S1:OT, S1:OT-A                                                                                      |
| 443 | No          | 11      | 11-B | 1000   | Bozic | Inf | unif   | wholeT_0.01 | S1:CBN, S1:CBN-A, S1:DiP, S1:DiP-A,<br>S1:OT, S1:OT-A, S5:CBN, S5:CBN-A,<br>S5:DiP, S5:DiP-A, S5:OT, S5:OT-A            |
| 444 | No          | 11      | 11-B | 1000   | Bozic | Inf | unif   | wholeT_0.5  | S1:CBN, S1:CBN-A, S1:OT, S1:OT-A                                                                                        |
| 445 | No          | 11      | 11-B | 1000   | exp   | 0   | last   | singleC     | S1:CBN-A, S1:OT, S1:OT-A                                                                                                |
| 446 | No          | 11      | 11-B | 1000   | exp   | 0   | last   | wholeT_0.01 | S1:DiP-A, S1:OT, S1:OT-A, S5:DiP-A,<br>S5:OT, S5:OT-A                                                                   |
| 447 | No          | 11      | 11-B | 1000   | exp   | 0   | last   | wholeT_0.5  | S1:OT, S1:OT-A                                                                                                          |
| 448 | No          | 11      | 11-B | 1000   | exp   | 0   | unif   | singleC     | none                                                                                                                    |
| 449 | No          | 11      | 11-B | 1000   | exp   | 0   | unif   | wholeT_0.01 | S1:CBN, S1:CBN-A, S1:OT, S1:OT-A                                                                                        |
| 450 | No          | 11      | 11-B | 1000   | exp   | 0   | unif   | wholeT_0.5  | none                                                                                                                    |
| 451 | No          | 11      | 11-B | 1000   | exp   | Inf | last   | singleC     | S1:CBN-A, S1:DiP, S1:DiP-A, S1:OT,<br>S1:OT-A, S5:DiP, S5:DiP-A, S5:OT,<br>S5:OT-A                                      |
| 452 | No          | 11      | 11-B | 1000   | exp   | Inf | last   | wholeT_0.01 | J1:DiP, J1:DiP-A, J1:OT, J1:OT-A,<br>S1:DiP, S1:DiP-A, S1:OT, S1:OT-A,<br>S5:DiP, S5:DiP-A, S5:OT, S5:OT-A              |
| 453 | No          | 11      | 11-B | 1000   | exp   | Inf | last   | wholeT_0.5  | S1:OT, S1:OT-A                                                                                                          |
| 454 | No          | 11      | 11-B | 1000   | exp   | Inf | unif   | singleC     | S1:CBN-A, S1:OT, S1:OT-A                                                                                                |
| 455 | No          | 11      | 11-B | 1000   | exp   | Inf | unif   | wholeT_0.01 | S1:CBN, S1:CBN-A, S1:DiP-A, S1:OT,<br>S1:OT-A                                                                           |
| 456 | No          | 11      | 11-B | 1000   | exp   | Inf | unif   | wholeT_0.5  | S1:CBN, S1:OT, S1:OT-A                                                                                                  |
| 457 | No          | 11      | 11-B | 1000   | McF_4 | 0   | last   | singleC     | S1:DiP-A, S1:OT, S1:OT-A                                                                                                |
| 458 | No          | 11      | 11-B | 1000   | McF_4 | 0   | last   | wholeT_0.01 | S1:DiP, S1:DiP-A, S1:OT, S1:OT-A                                                                                        |

Table 7: (continued)

|     | Conjunction | Drivers | Tree | S.Size | Model | sh  | S.Time | S.Type      | Best method(s)                                                        |
|-----|-------------|---------|------|--------|-------|-----|--------|-------------|-----------------------------------------------------------------------|
| 459 | No          | 11      | 11-B | 1000   | McF_4 | 0   | last   | wholeT_0.5  | S1:DiP-A, S1:OT, S1:OT-A                                              |
| 460 | No          | 11      | 11-B | 1000   | McF_4 | 0   | unif   | singleC     | S1:DiP, S1:DiP-A, S1:OT, S1:OT-A                                      |
| 461 | No          | 11      | 11-B | 1000   | McF_4 | 0   | unif   | wholeT_0.01 | S1:CBN, S1:OT, S1:OT-A                                                |
| 462 | No          | 11      | 11-B | 1000   | McF_4 | 0   | unif   | wholeT_0.5  | S1:DiP, S1:DiP-A, S1:OT, S1:OT-A                                      |
| 463 | No          | 11      | 11-B | 1000   | McF_4 | Inf | last   | singleC     | S1:OT, S1:OT-A                                                        |
| 464 | No          | 11      | 11-B | 1000   | McF_4 | Inf | last   | wholeT_0.01 | S1:DiP, S1:DiP-A, S1:OT, S1:OT-A,<br>S5:DiP, S5:DiP-A, S5:OT, S5:OT-A |
| 465 | No          | 11      | 11-B | 1000   | McF_4 | Inf | last   | wholeT_0.5  | S1:DiP-A, S1:OT, S1:OT-A                                              |
| 466 | No          | 11      | 11-B | 1000   | McF_4 | Inf | unif   | singleC     | S1:CBN-A, S1:OT, S1:OT-A                                              |
| 467 | No          | 11      | 11-B | 1000   | McF_4 | Inf | unif   | wholeT_0.01 | S1:OT, S1:OT-A                                                        |
| 468 | No          | 11      | 11-B | 1000   | McF_4 | Inf | unif   | wholeT_0.5  | S1:CBN, S1:OT, S1:OT-A                                                |
| 469 | No          | 11      | 11-B | 1000   | McF_6 | 0   | last   | singleC     | S1:DiP, S1:DiP-A, S1:OT, S1:OT-A,<br>S5:DiP, S5:DiP-A, S5:OT, S5:OT-A |
| 470 | No          | 11      | 11-B | 1000   | McF_6 | 0   | last   | wholeT_0.01 | S1:DiP, S1:DiP-A, S1:OT, S1:OT-A,<br>S5:DiP, S5:DiP-A, S5:OT, S5:OT-A |
| 471 | No          | 11      | 11-B | 1000   | McF_6 | 0   | last   | wholeT_0.5  | S1:DiP, S1:DiP-A, S1:OT, S1:OT-A,<br>S5:DiP, S5:DiP-A, S5:OT, S5:OT-A |
| 472 | No          | 11      | 11-B | 1000   | McF_6 | 0   | unif   | singleC     | S1:DiP, S1:DiP-A, S1:OT, S1:OT-A                                      |
| 473 | No          | 11      | 11-B | 1000   | McF_6 | 0   | unif   | wholeT_0.01 | S1:DiP, S1:DiP-A, S1:OT, S1:OT-A                                      |
| 474 | No          | 11      | 11-B | 1000   | McF_6 | 0   | unif   | wholeT_0.5  | S1:DiP, S1:DiP-A, S1:OT, S1:OT-A                                      |
| 475 | No          | 11      | 11-B | 1000   | McF_6 | Inf | last   | singleC     | S1:DiP, S1:DiP-A, S1:OT, S1:OT-A,<br>S5:DiP, S5:DiP-A, S5:OT, S5:OT-A |
| 476 | No          | 11      | 11-B | 1000   | McF_6 | Inf | last   | wholeT_0.01 | S1:DiP-A, S1:OT, S1:OT-A, S5:DiP-A,<br>S5:OT, S5:OT-A                 |
| 477 | No          | 11      | 11-B | 1000   | McF_6 | Inf | last   | wholeT_0.5  | S1:DiP, S1:DiP-A, S1:OT, S1:OT-A,<br>S5:DiP, S5:DiP-A, S5:OT, S5:OT-A |
| 478 | No          | 11      | 11-B | 1000   | McF_6 | Inf | unif   | singleC     | S1:DiP, S1:DiP-A, S1:OT, S1:OT-A                                      |
| 479 | No          | 11      | 11-B | 1000   | McF_6 | Inf | unif   | wholeT_0.01 | S1:DiP, S1:DiP-A, S1:OT, S1:OT-A                                      |
| 480 | No          | 11      | 11-B | 1000   | McF_6 | Inf | unif   | wholeT_0.5  | S1:DiP, S1:DiP-A, S1:OT, S1:OT-A                                      |
| 481 | No          | 11      | 11-B | 200    | Bozic | 0   | last   | singleC     | S1:OT, S1:OT-A                                                        |
| 482 | No          | 11      | 11-B | 200    | Bozic | 0   | last   | wholeT_0.01 | S1:OT, S1:OT-A                                                        |
| 483 | No          | 11      | 11-B | 200    | Bozic | 0   | last   | wholeT_0.5  | S1:CBN, S1:CBN-A, S1:OT, S1:OT-A                                      |
| 484 | No          | 11      | 11-B | 200    | Bozic | 0   | unif   | singleC     | S1:CBN, S1:CBN-A, S1:OT, S1:OT-A                                      |
| 485 | No          | 11      | 11-B | 200    | Bozic | 0   | unif   | wholeT_0.01 | S1:CBN, S1:CBN-A                                                      |
| 486 | No          | 11      | 11-B | 200    | Bozic | 0   | unif   | wholeT_0.5  | S1:CBN, S1:CBN-A, S1:OT, S1:OT-A                                      |
| 487 | No          | 11      | 11-B | 200    | Bozic | Inf | last   | singleC     | S1:CBN, S1:OT, S1:OT-A                                                |
| 488 | No          | 11      | 11-B | 200    | Bozic | Inf | last   | wholeT_0.01 | J1:OT, J1:OT-A, S1:OT, S1:OT-A,<br>S5:OT, S5:OT-A                     |
| 489 | No          | 11      | 11-B | 200    | Bozic | Inf | last   | wholeT_0.5  | S1:OT, S1:OT-A                                                        |
| 490 | No          | 11      | 11-B | 200    | Bozic | Inf | unif   | singleC     | S1:CBN, S1:CBN-A, S1:OT, S1:OT-A                                      |

Table 7: (continued)

|     | Conjunction | Drivers | Tree | S.Size | Model | sh  | S.Time | S.Type      | Best method(s)                                                     |
|-----|-------------|---------|------|--------|-------|-----|--------|-------------|--------------------------------------------------------------------|
| 491 | No          | 11      | 11-B | 200    | Bozic | Inf | unif   | wholeT_0.01 | S1:CBN, S1:CBN-A, S1:OT, S1:OT-A, S5:CBN, S5:CBN-A, S5:OT, S5:OT-A |
| 492 | No          | 11      | 11-B | 200    | Bozic | Inf | unif   | wholeT_0.5  | S1:CBN, S1:CBN-A, S1:OT, S1:OT-A                                   |
| 493 | No          | 11      | 11-B | 200    | exp   | 0   | last   | singleC     | S1:CBN-A, S1:OT, S1:OT-A                                           |
| 494 | No          | 11      | 11-B | 200    | exp   | 0   | last   | wholeT_0.01 | S1:CBN, S1:CBN-A, S1:OT, S1:OT-A                                   |
| 495 | No          | 11      | 11-B | 200    | exp   | 0   | last   | wholeT_0.5  | S1:CBN, S1:OT, S1:OT-A                                             |
| 496 | No          | 11      | 11-B | 200    | exp   | 0   | unif   | singleC     | none                                                               |
| 497 | No          | 11      | 11-B | 200    | exp   | 0   | unif   | wholeT_0.01 | S1:CBN, S1:CBN-A, S1:OT, S1:OT-A                                   |
| 498 | No          | 11      | 11-B | 200    | exp   | 0   | unif   | wholeT_0.5  | none                                                               |
| 499 | No          | 11      | 11-B | 200    | exp   | Inf | last   | singleC     | S1:OT, S1:OT-A                                                     |
| 500 | No          | 11      | 11-B | 200    | exp   | Inf | last   | wholeT_0.01 | J1:OT, J1:OT-A, S1:CBN, S1:OT, S1:OT-A, S5:CBN-A, S5:OT, S5:OT-A   |
| 501 | No          | 11      | 11-B | 200    | exp   | Inf | last   | wholeT_0.5  | S1:OT, S1:OT-A                                                     |
| 502 | No          | 11      | 11-B | 200    | exp   | Inf | unif   | singleC     | S1:CBN, S1:CBN-A, S1:OT, S1:OT-A                                   |
| 503 | No          | 11      | 11-B | 200    | exp   | Inf | unif   | wholeT_0.01 | S1:CBN, S1:CBN-A, S1:OT, S1:OT-A                                   |
| 504 | No          | 11      | 11-B | 200    | exp   | Inf | unif   | wholeT_0.5  | S1:CBN, S1:CBN-A, S1:OT, S1:OT-A                                   |
| 505 | No          | 11      | 11-B | 200    | McF_4 | 0   | last   | singleC     | S1:OT, S1:OT-A                                                     |
| 506 | No          | 11      | 11-B | 200    | McF_4 | 0   | last   | wholeT_0.01 | S1:OT, S1:OT-A                                                     |
| 507 | No          | 11      | 11-B | 200    | McF_4 | 0   | last   | wholeT_0.5  | S1:OT, S1:OT-A                                                     |
| 508 | No          | 11      | 11-B | 200    | McF_4 | 0   | unif   | singleC     | S1:CBN-A, S1:OT, S1:OT-A                                           |
| 509 | No          | 11      | 11-B | 200    | McF_4 | 0   | unif   | wholeT_0.01 | S1:CBN, S1:CBN-A, S1:OT, S1:OT-A                                   |
| 510 | No          | 11      | 11-B | 200    | McF_4 | 0   | unif   | wholeT_0.5  | S1:OT, S1:OT-A                                                     |
| 511 | No          | 11      | 11-B | 200    | McF_4 | Inf | last   | singleC     | S1:OT, S1:OT-A                                                     |
| 512 | No          | 11      | 11-B | 200    | McF_4 | Inf | last   | wholeT_0.01 | S1:OT, S1:OT-A, S5:OT, S5:OT-A                                     |
| 513 | No          | 11      | 11-B | 200    | McF_4 | Inf | last   | wholeT_0.5  | S1:OT, S1:OT-A                                                     |
| 514 | No          | 11      | 11-B | 200    | McF_4 | Inf | unif   | singleC     | S1:OT, S1:OT-A                                                     |
| 515 | No          | 11      | 11-B | 200    | McF_4 | Inf | unif   | wholeT_0.01 | S1:OT, S1:OT-A                                                     |
| 516 | No          | 11      | 11-B | 200    | McF_4 | Inf | unif   | wholeT_0.5  | S1:OT, S1:OT-A                                                     |
| 517 | No          | 11      | 11-B | 200    | McF_6 | 0   | last   | singleC     | S1:OT, S1:OT-A, S5:OT, S5:OT-A                                     |
| 518 | No          | 11      | 11-B | 200    | McF_6 | 0   | last   | wholeT_0.01 | S1:OT, S1:OT-A, S5:OT, S5:OT-A                                     |
| 519 | No          | 11      | 11-B | 200    | McF_6 | 0   | last   | wholeT_0.5  | S1:OT, S1:OT-A, S5:OT, S5:OT-A                                     |
| 520 | No          | 11      | 11-B | 200    | McF_6 | 0   | unif   | singleC     | S1:OT, S1:OT-A                                                     |
| 521 | No          | 11      | 11-B | 200    | McF_6 | 0   | unif   | wholeT_0.01 | S1:OT, S1:OT-A                                                     |
| 522 | No          | 11      | 11-B | 200    | McF_6 | 0   | unif   | wholeT_0.5  | S1:OT, S1:OT-A                                                     |
| 523 | No          | 11      | 11-B | 200    | McF_6 | Inf | last   | singleC     | S1:OT, S1:OT-A, S5:OT, S5:OT-A                                     |
| 524 | No          | 11      | 11-B | 200    | McF_6 | Inf | last   | wholeT_0.01 | S1:OT, S1:OT-A, S5:OT, S5:OT-A                                     |
| 525 | No          | 11      | 11-B | 200    | McF_6 | Inf | last   | wholeT_0.5  | S1:OT, S1:OT-A, S5:OT, S5:OT-A                                     |
| 526 | No          | 11      | 11-B | 200    | McF_6 | Inf | unif   | singleC     | S1:OT, S1:OT-A                                                     |
| 527 | No          | 11      | 11-B | 200    | McF_6 | Inf | unif   | wholeT_0.01 | S1:OT, S1:OT-A                                                     |
| 528 | No          | 11      | 11-B | 200    | McF_6 | Inf | unif   | wholeT_0.5  | S1:OT, S1:OT-A                                                     |



Table 7: (continued)

|     | Conjunction | Drivers | Tree | S.Size | Model | sh  | S.Time | S.Type      | Best method(s)                                                                             |
|-----|-------------|---------|------|--------|-------|-----|--------|-------------|--------------------------------------------------------------------------------------------|
| 529 | No          | 11      | 11-B | 100    | Bozic | 0   | last   | singleC     | S1:CBN, S1:CBN-A, S1:OT, S1:OT-A                                                           |
| 530 | No          | 11      | 11-B | 100    | Bozic | 0   | last   | wholeT_0.01 | S1:CBN, S1:CBN-A, S1:OT, S1:OT-A                                                           |
| 531 | No          | 11      | 11-B | 100    | Bozic | 0   | last   | wholeT_0.5  | S1:CBN, S1:OT, S1:OT-A                                                                     |
| 532 | No          | 11      | 11-B | 100    | Bozic | 0   | unif   | singleC     | S1:CBN, S1:CBN-A, S1:OT, S1:OT-A                                                           |
| 533 | No          | 11      | 11-B | 100    | Bozic | 0   | unif   | wholeT_0.01 | S1:CBN, S1:CBN-A                                                                           |
| 534 | No          | 11      | 11-B | 100    | Bozic | 0   | unif   | wholeT_0.5  | S1:CBN, S1:CBN-A, S1:OT, S1:OT-A                                                           |
| 535 | No          | 11      | 11-B | 100    | Bozic | Inf | last   | singleC     | S1:CBN-A, S1:OT, S1:OT-A                                                                   |
| 536 | No          | 11      | 11-B | 100    | Bozic | Inf | last   | wholeT_0.01 | J1:OT, J1:OT-A, S1:CBN-A, S1:OT, S1:OT-A, S5:OT, S5:OT-A                                   |
| 537 | No          | 11      | 11-B | 100    | Bozic | Inf | last   | wholeT_0.5  | S1:OT, S1:OT-A                                                                             |
| 538 | No          | 11      | 11-B | 100    | Bozic | Inf | unif   | singleC     | S1:CBN, S1:CBN-A, S1:OT, S1:OT-A                                                           |
| 539 | No          | 11      | 11-B | 100    | Bozic | Inf | unif   | wholeT_0.01 | J1:CBN, J1:CBN-A, J1:OT, J1:OT-A, S1:CBN, S1:CBN-A, S1:OT, S1:OT-A, S5:CBN, S5:OT, S5:OT-A |
| 540 | No          | 11      | 11-B | 100    | Bozic | Inf | unif   | wholeT_0.5  | S1:CBN, S1:CBN-A, S1:OT, S1:OT-A                                                           |
| 541 | No          | 11      | 11-B | 100    | exp   | 0   | last   | singleC     | S1:OT, S1:OT-A                                                                             |
| 542 | No          | 11      | 11-B | 100    | exp   | 0   | last   | wholeT_0.01 | S1:CBN, S1:OT, S1:OT-A                                                                     |
| 543 | No          | 11      | 11-B | 100    | exp   | 0   | last   | wholeT_0.5  | S1:CBN-A, S1:OT, S1:OT-A                                                                   |
| 544 | No          | 11      | 11-B | 100    | exp   | 0   | unif   | singleC     | J1:CBN, J1:CBN-A, J1:OT, J1:OT-A, S1:CBN, S1:CBN-A, S1:OT, S1:OT-A                         |
| 545 | No          | 11      | 11-B | 100    | exp   | 0   | unif   | wholeT_0.01 | S1:CBN, S1:CBN-A, S1:OT, S1:OT-A                                                           |
| 546 | No          | 11      | 11-B | 100    | exp   | 0   | unif   | wholeT_0.5  | J1:CBN, J1:CBN-A, J1:OT, J1:OT-A, S1:CBN, S1:CBN-A, S1:OT, S1:OT-A                         |
| 547 | No          | 11      | 11-B | 100    | exp   | Inf | last   | singleC     | S1:CBN, S1:OT, S1:OT-A                                                                     |
| 548 | No          | 11      | 11-B | 100    | exp   | Inf | last   | wholeT_0.01 | S1:OT, S1:OT-A, S5:CBN-A, S5:OT, S5:OT-A                                                   |
| 549 | No          | 11      | 11-B | 100    | exp   | Inf | last   | wholeT_0.5  | S1:OT, S1:OT-A                                                                             |
| 550 | No          | 11      | 11-B | 100    | exp   | Inf | unif   | singleC     | S1:CBN, S1:OT, S1:OT-A                                                                     |
| 551 | No          | 11      | 11-B | 100    | exp   | Inf | unif   | wholeT_0.01 | S1:CBN, S1:CBN-A, S1:OT, S1:OT-A                                                           |
| 552 | No          | 11      | 11-B | 100    | exp   | Inf | unif   | wholeT_0.5  | S1:CBN-A, S1:OT, S1:OT-A                                                                   |
| 553 | No          | 11      | 11-B | 100    | McF_4 | 0   | last   | singleC     | S1:OT, S1:OT-A                                                                             |
| 554 | No          | 11      | 11-B | 100    | McF_4 | 0   | last   | wholeT_0.01 | S1:OT, S1:OT-A, S5:OT, S5:OT-A                                                             |
| 555 | No          | 11      | 11-B | 100    | McF_4 | 0   | last   | wholeT_0.5  | S1:OT, S1:OT-A                                                                             |
| 556 | No          | 11      | 11-B | 100    | McF_4 | 0   | unif   | singleC     | S1:CBN, S1:CBN-A, S1:OT, S1:OT-A                                                           |
| 557 | No          | 11      | 11-B | 100    | McF_4 | 0   | unif   | wholeT_0.01 | S1:CBN, S1:CBN-A, S1:OT, S1:OT-A                                                           |
| 558 | No          | 11      | 11-B | 100    | McF_4 | 0   | unif   | wholeT_0.5  | S1:CBN, S1:OT, S1:OT-A                                                                     |
| 559 | No          | 11      | 11-B | 100    | McF_4 | Inf | last   | singleC     | S1:OT, S1:OT-A                                                                             |
| 560 | No          | 11      | 11-B | 100    | McF_4 | Inf | last   | wholeT_0.01 | S1:OT, S1:OT-A, S5:OT, S5:OT-A                                                             |
| 561 | No          | 11      | 11-B | 100    | McF_4 | Inf | last   | wholeT_0.5  | S1:OT, S1:OT-A                                                                             |
| 562 | No          | 11      | 11-B | 100    | McF_4 | Inf | unif   | singleC     | S1:OT, S1:OT-A                                                                             |

Table 7: (continued)

|     | Conjunction | Drivers | Tree | S.Size | Model | sh  | S.Time | S.Type      | Best method(s)                                                                                                                                     |
|-----|-------------|---------|------|--------|-------|-----|--------|-------------|----------------------------------------------------------------------------------------------------------------------------------------------------|
| 563 | No          | 11      | 11-B | 100    | McF_4 | Inf | unif   | wholeT_0.01 | S1:OT, S1:OT-A                                                                                                                                     |
| 564 | No          | 11      | 11-B | 100    | McF_4 | Inf | unif   | wholeT_0.5  | S1:OT, S1:OT-A                                                                                                                                     |
| 565 | No          | 11      | 11-B | 100    | McF_6 | 0   | last   | singleC     | S1:OT, S1:OT-A, S5:OT, S5:OT-A                                                                                                                     |
| 566 | No          | 11      | 11-B | 100    | McF_6 | 0   | last   | wholeT_0.01 | S1:OT, S1:OT-A, S5:OT, S5:OT-A                                                                                                                     |
| 567 | No          | 11      | 11-B | 100    | McF_6 | 0   | last   | wholeT_0.5  | S1:OT, S1:OT-A, S5:OT, S5:OT-A                                                                                                                     |
| 568 | No          | 11      | 11-B | 100    | McF_6 | 0   | unif   | singleC     | S1:OT, S1:OT-A                                                                                                                                     |
| 569 | No          | 11      | 11-B | 100    | McF_6 | 0   | unif   | wholeT_0.01 | S1:OT, S1:OT-A                                                                                                                                     |
| 570 | No          | 11      | 11-B | 100    | McF_6 | 0   | unif   | wholeT_0.5  | S1:OT, S1:OT-A                                                                                                                                     |
| 571 | No          | 11      | 11-B | 100    | McF_6 | Inf | last   | singleC     | S1:OT, S1:OT-A, S5:OT, S5:OT-A                                                                                                                     |
| 572 | No          | 11      | 11-B | 100    | McF_6 | Inf | last   | wholeT_0.01 | S1:OT, S1:OT-A, S5:OT, S5:OT-A                                                                                                                     |
| 573 | No          | 11      | 11-B | 100    | McF_6 | Inf | last   | wholeT_0.5  | S1:OT, S1:OT-A, S5:OT, S5:OT-A                                                                                                                     |
| 574 | No          | 11      | 11-B | 100    | McF_6 | Inf | unif   | singleC     | S1:OT, S1:OT-A                                                                                                                                     |
| 575 | No          | 11      | 11-B | 100    | McF_6 | Inf | unif   | wholeT_0.01 | S1:OT, S1:OT-A                                                                                                                                     |
| 576 | No          | 11      | 11-B | 100    | McF_6 | Inf | unif   | wholeT_0.5  | S1:OT, S1:OT-A                                                                                                                                     |
| 577 | No          | 9       | 9-B  | 1000   | Bozic | 0   | last   | singleC     | S1:CBN-A, S1:OT, S1:OT-A                                                                                                                           |
| 578 | No          | 9       | 9-B  | 1000   | Bozic | 0   | last   | wholeT_0.01 | S1:CBN-A, S1:DiP, S1:DiP-A, S1:OT, S1:OT-A, S5:CBN-A, S5:DiP, S5:DiP-A, S5:OT, S5:OT-A                                                             |
| 579 | No          | 9       | 9-B  | 1000   | Bozic | 0   | last   | wholeT_0.5  | S1:OT, S1:OT-A                                                                                                                                     |
| 580 | No          | 9       | 9-B  | 1000   | Bozic | 0   | unif   | singleC     | none                                                                                                                                               |
| 581 | No          | 9       | 9-B  | 1000   | Bozic | 0   | unif   | wholeT_0.01 | S1:CBN, S1:CBN-A, S1:OT, S1:OT-A                                                                                                                   |
| 582 | No          | 9       | 9-B  | 1000   | Bozic | 0   | unif   | wholeT_0.5  | none                                                                                                                                               |
| 583 | No          | 9       | 9-B  | 1000   | Bozic | Inf | last   | singleC     | S1:CBN, S1:CBN-A, S1:DiP, S1:DiP-A, S1:OT, S1:OT-A, S5:DiP, S5:DiP-A, S5:OT, S5:OT-A                                                               |
| 584 | No          | 9       | 9-B  | 1000   | Bozic | Inf | last   | wholeT_0.01 | J1:CBN, J1:CBN-A, J1:DiP, J1:DiP-A, J1:OT, J1:OT-A, S1:CBN, S1:CBN-A, S1:DiP, S1:DiP-A, S1:OT, S1:OT-A, S5:CBN-A, S5:DiP, S5:DiP-A, S5:OT, S5:OT-A |
| 585 | No          | 9       | 9-B  | 1000   | Bozic | Inf | last   | wholeT_0.5  | S1:CBN, S1:CBN-A, S1:DiP, S1:DiP-A, S1:OT, S1:OT-A, S5:DiP, S5:DiP-A, S5:OT, S5:OT-A                                                               |
| 586 | No          | 9       | 9-B  | 1000   | Bozic | Inf | unif   | singleC     | S1:CBN, S1:CBN-A, S1:OT, S1:OT-A                                                                                                                   |
| 587 | No          | 9       | 9-B  | 1000   | Bozic | Inf | unif   | wholeT_0.01 | S1:CBN, S1:CBN-A, S1:DiP, S1:DiP-A, S1:OT, S1:OT-A, S5:CBN, S5:CBN-A, S5:DiP, S5:DiP-A, S5:OT, S5:OT-A                                             |
| 588 | No          | 9       | 9-B  | 1000   | Bozic | Inf | unif   | wholeT_0.5  | S1:CBN, S1:OT, S1:OT-A                                                                                                                             |
| 589 | No          | 9       | 9-B  | 1000   | exp   | 0   | last   | singleC     | S1:OT, S1:OT-A                                                                                                                                     |
| 590 | No          | 9       | 9-B  | 1000   | exp   | 0   | last   | wholeT_0.01 | S1:CBN-A, S1:DiP-A, S1:OT, S1:OT-A                                                                                                                 |

Table 7: (continued)

|     | Conjunction | Drivers | Tree | S.Size | Model | sh  | S.Time | S.Type      | Best method(s)                                                                                                                                                 |
|-----|-------------|---------|------|--------|-------|-----|--------|-------------|----------------------------------------------------------------------------------------------------------------------------------------------------------------|
| 591 | No          | 9       | 9-B  | 1000   | exp   | 0   | last   | wholeT_0.5  | none                                                                                                                                                           |
| 592 | No          | 9       | 9-B  | 1000   | exp   | 0   | unif   | singleC     | none                                                                                                                                                           |
| 593 | No          | 9       | 9-B  | 1000   | exp   | 0   | unif   | wholeT_0.01 | none                                                                                                                                                           |
| 594 | No          | 9       | 9-B  | 1000   | exp   | 0   | unif   | wholeT_0.5  | none                                                                                                                                                           |
| 595 | No          | 9       | 9-B  | 1000   | exp   | Inf | last   | singleC     | S1:DiP, S1:DiP-A, S1:OT, S1:OT-A,<br>S5:DiP, S5:DiP-A, S5:OT, S5:OT-A                                                                                          |
| 596 | No          | 9       | 9-B  | 1000   | exp   | Inf | last   | wholeT_0.01 | J1:CBN-A, J1:DiP, J1:DiP-A, J1:OT,<br>J1:OT-A, S1:CBN, S1:CBN-A, S1:DiP,<br>S1:DiP-A, S1:OT, S1:OT-A, S5:CBN,<br>S5:CBN-A, S5:DiP, S5:DiP-A, S5:OT,<br>S5:OT-A |
| 597 | No          | 9       | 9-B  | 1000   | exp   | Inf | last   | wholeT_0.5  | S1:CBN, S1:DiP, S1:DiP-A, S1:OT,<br>S1:OT-A, S5:DiP, S5:DiP-A, S5:OT,<br>S5:OT-A                                                                               |
| 598 | No          | 9       | 9-B  | 1000   | exp   | Inf | unif   | singleC     | S1:CBN, S1:CBN-A, S1:OT, S1:OT-A                                                                                                                               |
| 599 | No          | 9       | 9-B  | 1000   | exp   | Inf | unif   | wholeT_0.01 | S1:CBN, S1:CBN-A, S1:OT, S1:OT-A                                                                                                                               |
| 600 | No          | 9       | 9-B  | 1000   | exp   | Inf | unif   | wholeT_0.5  | S1:CBN, S1:CBN-A, S1:OT, S1:OT-A                                                                                                                               |
| 601 | No          | 9       | 9-B  | 1000   | McF_4 | 0   | last   | singleC     | S1:DiP, S1:DiP-A, S1:OT, S1:OT-A                                                                                                                               |
| 602 | No          | 9       | 9-B  | 1000   | McF_4 | 0   | last   | wholeT_0.01 | S1:DiP, S1:DiP-A, S1:OT, S1:OT-A,<br>S5:DiP, S5:DiP-A, S5:OT, S5:OT-A                                                                                          |
| 603 | No          | 9       | 9-B  | 1000   | McF_4 | 0   | last   | wholeT_0.5  | S1:DiP-A, S1:OT, S1:OT-A                                                                                                                                       |
| 604 | No          | 9       | 9-B  | 1000   | McF_4 | 0   | unif   | singleC     | S1:DiP, S1:DiP-A, S1:OT, S1:OT-A                                                                                                                               |
| 605 | No          | 9       | 9-B  | 1000   | McF_4 | 0   | unif   | wholeT_0.01 | S1:DiP-A, S1:OT, S1:OT-A                                                                                                                                       |
| 606 | No          | 9       | 9-B  | 1000   | McF_4 | 0   | unif   | wholeT_0.5  | S1:DiP, S1:DiP-A, S1:OT, S1:OT-A                                                                                                                               |
| 607 | No          | 9       | 9-B  | 1000   | McF_4 | Inf | last   | singleC     | S1:OT, S1:OT-A                                                                                                                                                 |
| 608 | No          | 9       | 9-B  | 1000   | McF_4 | Inf | last   | wholeT_0.01 | S1:DiP, S1:DiP-A, S1:OT, S1:OT-A,<br>S5:DiP, S5:DiP-A, S5:OT, S5:OT-A                                                                                          |
| 609 | No          | 9       | 9-B  | 1000   | McF_4 | Inf | last   | wholeT_0.5  | S1:OT, S1:OT-A                                                                                                                                                 |
| 610 | No          | 9       | 9-B  | 1000   | McF_4 | Inf | unif   | singleC     | S1:CBN-A, S1:DiP, S1:DiP-A, S1:OT,<br>S1:OT-A                                                                                                                  |
| 611 | No          | 9       | 9-B  | 1000   | McF_4 | Inf | unif   | wholeT_0.01 | S1:OT, S1:OT-A                                                                                                                                                 |
| 612 | No          | 9       | 9-B  | 1000   | McF_4 | Inf | unif   | wholeT_0.5  | S1:CBN, S1:DiP, S1:DiP-A, S1:OT,<br>S1:OT-A                                                                                                                    |
| 613 | No          | 9       | 9-B  | 1000   | McF_6 | 0   | last   | singleC     | S1:DiP-A, S1:OT-A, S5:DiP-A, S5:OT-A                                                                                                                           |
| 614 | No          | 9       | 9-B  | 1000   | McF_6 | 0   | last   | wholeT_0.01 | J1:DiP-A, J1:OT-A, S1:DiP-A, S1:OT-A,<br>S5:DiP-A, S5:OT-A                                                                                                     |
| 615 | No          | 9       | 9-B  | 1000   | McF_6 | 0   | last   | wholeT_0.5  | S1:DiP-A, S1:OT-A, S5:DiP-A, S5:OT-A                                                                                                                           |
| 616 | No          | 9       | 9-B  | 1000   | McF_6 | 0   | unif   | singleC     | S1:CBN, S1:DiP, S1:DiP-A, S1:OT,<br>S1:OT-A                                                                                                                    |

Table 7: (continued)

|     | Conjunction | Drivers | Tree | S.Size | Model | sh  | S.Time | S.Type      | Best method(s)                                                                               |
|-----|-------------|---------|------|--------|-------|-----|--------|-------------|----------------------------------------------------------------------------------------------|
| 617 | No          | 9       | 9-B  | 1000   | McF_6 | 0   | unif   | wholeT_0.01 | S1:DiP, S1:DiP-A, S1:OT, S1:OT-A, S5:DiP, S5:DiP-A, S5:OT, S5:OT-A                           |
| 618 | No          | 9       | 9-B  | 1000   | McF_6 | 0   | unif   | wholeT_0.5  | S1:DiP, S1:DiP-A, S1:OT, S1:OT-A                                                             |
| 619 | No          | 9       | 9-B  | 1000   | McF_6 | Inf | last   | singleC     | S1:DiP-A, S1:OT-A, S5:DiP-A, S5:OT-A                                                         |
| 620 | No          | 9       | 9-B  | 1000   | McF_6 | Inf | last   | wholeT_0.01 | S1:DiP-A, S1:OT-A, S5:DiP-A, S5:OT-A                                                         |
| 621 | No          | 9       | 9-B  | 1000   | McF_6 | Inf | last   | wholeT_0.5  | S1:DiP-A, S1:OT-A, S5:DiP-A, S5:OT-A                                                         |
| 622 | No          | 9       | 9-B  | 1000   | McF_6 | Inf | unif   | singleC     | S1:CBN, S1:CBN-A, S1:DiP, S1:DiP-A, S1:OT, S1:OT-A                                           |
| 623 | No          | 9       | 9-B  | 1000   | McF_6 | Inf | unif   | wholeT_0.01 | S1:DiP, S1:DiP-A, S1:OT, S1:OT-A                                                             |
| 624 | No          | 9       | 9-B  | 1000   | McF_6 | Inf | unif   | wholeT_0.5  | S1:DiP, S1:DiP-A, S1:OT, S1:OT-A                                                             |
| 625 | No          | 9       | 9-B  | 200    | Bozic | 0   | last   | singleC     | S1:CBN, S1:CBN-A, S1:OT, S1:OT-A                                                             |
| 626 | No          | 9       | 9-B  | 200    | Bozic | 0   | last   | wholeT_0.01 | S1:CBN, S1:CBN-A, S1:OT, S1:OT-A, S5:OT, S5:OT-A                                             |
| 627 | No          | 9       | 9-B  | 200    | Bozic | 0   | last   | wholeT_0.5  | S1:OT, S1:OT-A                                                                               |
| 628 | No          | 9       | 9-B  | 200    | Bozic | 0   | unif   | singleC     | S1:CBN, S1:CBN-A, S1:OT, S1:OT-A                                                             |
| 629 | No          | 9       | 9-B  | 200    | Bozic | 0   | unif   | wholeT_0.01 | S1:CBN, S1:CBN-A                                                                             |
| 630 | No          | 9       | 9-B  | 200    | Bozic | 0   | unif   | wholeT_0.5  | none                                                                                         |
| 631 | No          | 9       | 9-B  | 200    | Bozic | Inf | last   | singleC     | S1:OT, S1:OT-A, S5:OT, S5:OT-A                                                               |
| 632 | No          | 9       | 9-B  | 200    | Bozic | Inf | last   | wholeT_0.01 | J1:CBN-A, J1:OT, J1:OT-A, S1:CBN-A, S1:OT, S1:OT-A, S5:CBN-A, S5:OT, S5:OT-A                 |
| 633 | No          | 9       | 9-B  | 200    | Bozic | Inf | last   | wholeT_0.5  | S1:CBN, S1:CBN-A, S1:OT, S1:OT-A, S5:OT, S5:OT-A                                             |
| 634 | No          | 9       | 9-B  | 200    | Bozic | Inf | unif   | singleC     | S1:CBN, S1:CBN-A, S1:OT, S1:OT-A                                                             |
| 635 | No          | 9       | 9-B  | 200    | Bozic | Inf | unif   | wholeT_0.01 | S1:CBN, S1:CBN-A, S1:OT, S1:OT-A, S5:CBN, S5:CBN-A, S5:OT, S5:OT-A                           |
| 636 | No          | 9       | 9-B  | 200    | Bozic | Inf | unif   | wholeT_0.5  | S1:CBN, S1:CBN-A, S1:OT, S1:OT-A                                                             |
| 637 | No          | 9       | 9-B  | 200    | exp   | 0   | last   | singleC     | S1:OT, S1:OT-A                                                                               |
| 638 | No          | 9       | 9-B  | 200    | exp   | 0   | last   | wholeT_0.01 | S1:CBN, S1:OT, S1:OT-A                                                                       |
| 639 | No          | 9       | 9-B  | 200    | exp   | 0   | last   | wholeT_0.5  | S1:CBN, S1:CBN-A, S1:OT, S1:OT-A                                                             |
| 640 | No          | 9       | 9-B  | 200    | exp   | 0   | unif   | singleC     | none                                                                                         |
| 641 | No          | 9       | 9-B  | 200    | exp   | 0   | unif   | wholeT_0.01 | S1:CBN, S1:CBN-A, S1:OT, S1:OT-A                                                             |
| 642 | No          | 9       | 9-B  | 200    | exp   | 0   | unif   | wholeT_0.5  | none                                                                                         |
| 643 | No          | 9       | 9-B  | 200    | exp   | Inf | last   | singleC     | S1:CBN, S1:CBN-A, S1:OT, S1:OT-A, S5:OT, S5:OT-A                                             |
| 644 | No          | 9       | 9-B  | 200    | exp   | Inf | last   | wholeT_0.01 | J1:CBN, J1:CBN-A, J1:OT, J1:OT-A, S1:CBN, S1:CBN-A, S1:OT, S1:OT-A, S5:CBN-A, S5:OT, S5:OT-A |
| 645 | No          | 9       | 9-B  | 200    | exp   | Inf | last   | wholeT_0.5  | S1:OT, S1:OT-A, S5:OT, S5:OT-A                                                               |
| 646 | No          | 9       | 9-B  | 200    | exp   | Inf | unif   | singleC     | S1:CBN, S1:OT, S1:OT-A                                                                       |

Table 7: (continued)

|     | Conjunction | Drivers | Tree | S.Size | Model | sh  | S.Time | S.Type      | Best method(s)                                                        |
|-----|-------------|---------|------|--------|-------|-----|--------|-------------|-----------------------------------------------------------------------|
| 647 | No          | 9       | 9-B  | 200    | exp   | Inf | unif   | wholeT_0.01 | S1:CBN, S1:CBN-A, S1:OT, S1:OT-A                                      |
| 648 | No          | 9       | 9-B  | 200    | exp   | Inf | unif   | wholeT_0.5  | S1:CBN, S1:CBN-A, S1:OT, S1:OT-A                                      |
| 649 | No          | 9       | 9-B  | 200    | McF_4 | 0   | last   | singleC     | S1:OT, S1:OT-A                                                        |
| 650 | No          | 9       | 9-B  | 200    | McF_4 | 0   | last   | wholeT_0.01 | S1:OT, S1:OT-A, S5:OT, S5:OT-A                                        |
| 651 | No          | 9       | 9-B  | 200    | McF_4 | 0   | last   | wholeT_0.5  | S1:OT, S1:OT-A                                                        |
| 652 | No          | 9       | 9-B  | 200    | McF_4 | 0   | unif   | singleC     | S1:CBN-A, S1:OT, S1:OT-A                                              |
| 653 | No          | 9       | 9-B  | 200    | McF_4 | 0   | unif   | wholeT_0.01 | S1:CBN, S1:CBN-A, S1:OT, S1:OT-A                                      |
| 654 | No          | 9       | 9-B  | 200    | McF_4 | 0   | unif   | wholeT_0.5  | S1:OT, S1:OT-A                                                        |
| 655 | No          | 9       | 9-B  | 200    | McF_4 | Inf | last   | singleC     | S1:OT, S1:OT-A                                                        |
| 656 | No          | 9       | 9-B  | 200    | McF_4 | Inf | last   | wholeT_0.01 | S1:OT, S1:OT-A                                                        |
| 657 | No          | 9       | 9-B  | 200    | McF_4 | Inf | last   | wholeT_0.5  | S1:OT, S1:OT-A                                                        |
| 658 | No          | 9       | 9-B  | 200    | McF_4 | Inf | unif   | singleC     | S1:CBN, S1:OT, S1:OT-A                                                |
| 659 | No          | 9       | 9-B  | 200    | McF_4 | Inf | unif   | wholeT_0.01 | S1:CBN-A, S1:OT, S1:OT-A                                              |
| 660 | No          | 9       | 9-B  | 200    | McF_4 | Inf | unif   | wholeT_0.5  | S1:OT, S1:OT-A                                                        |
| 661 | No          | 9       | 9-B  | 200    | McF_6 | 0   | last   | singleC     | S1:OT-A, S5:OT-A                                                      |
| 662 | No          | 9       | 9-B  | 200    | McF_6 | 0   | last   | wholeT_0.01 | J1:OT-A, S1:OT-A, S5:OT-A                                             |
| 663 | No          | 9       | 9-B  | 200    | McF_6 | 0   | last   | wholeT_0.5  | S1:OT-A, S5:OT-A                                                      |
| 664 | No          | 9       | 9-B  | 200    | McF_6 | 0   | unif   | singleC     | S1:OT, S1:OT-A                                                        |
| 665 | No          | 9       | 9-B  | 200    | McF_6 | 0   | unif   | wholeT_0.01 | S1:OT, S1:OT-A                                                        |
| 666 | No          | 9       | 9-B  | 200    | McF_6 | 0   | unif   | wholeT_0.5  | S1:OT, S1:OT-A                                                        |
| 667 | No          | 9       | 9-B  | 200    | McF_6 | Inf | last   | singleC     | S1:OT-A, S5:OT-A                                                      |
| 668 | No          | 9       | 9-B  | 200    | McF_6 | Inf | last   | wholeT_0.01 | S1:OT-A, S5:OT-A                                                      |
| 669 | No          | 9       | 9-B  | 200    | McF_6 | Inf | last   | wholeT_0.5  | S1:OT-A, S5:OT-A                                                      |
| 670 | No          | 9       | 9-B  | 200    | McF_6 | Inf | unif   | singleC     | S1:OT, S1:OT-A                                                        |
| 671 | No          | 9       | 9-B  | 200    | McF_6 | Inf | unif   | wholeT_0.01 | S1:OT, S1:OT-A                                                        |
| 672 | No          | 9       | 9-B  | 200    | McF_6 | Inf | unif   | wholeT_0.5  | S1:OT, S1:OT-A                                                        |
| 673 | No          | 9       | 9-B  | 100    | Bozic | 0   | last   | singleC     | S1:CBN, S1:CBN-A, S1:OT, S1:OT-A                                      |
| 674 | No          | 9       | 9-B  | 100    | Bozic | 0   | last   | wholeT_0.01 | S1:CBN-A, S1:OT, S1:OT-A                                              |
| 675 | No          | 9       | 9-B  | 100    | Bozic | 0   | last   | wholeT_0.5  | S1:CBN, S1:OT, S1:OT-A                                                |
| 676 | No          | 9       | 9-B  | 100    | Bozic | 0   | unif   | singleC     | S1:CBN, S1:CBN-A, S1:OT, S1:OT-A                                      |
| 677 | No          | 9       | 9-B  | 100    | Bozic | 0   | unif   | wholeT_0.01 | S1:CBN, S1:CBN-A                                                      |
| 678 | No          | 9       | 9-B  | 100    | Bozic | 0   | unif   | wholeT_0.5  | J1:CBN, J1:CBN-A, J1:OT, J1:OT-A,<br>S1:CBN, S1:CBN-A, S1:OT, S1:OT-A |
| 679 | No          | 9       | 9-B  | 100    | Bozic | Inf | last   | singleC     | S1:CBN, S1:CBN-A, S1:OT, S1:OT-A,<br>S5:OT, S5:OT-A                   |
| 680 | No          | 9       | 9-B  | 100    | Bozic | Inf | last   | wholeT_0.01 | J1:OT, J1:OT-A, S1:OT, S1:OT-A,<br>S5:OT, S5:OT-A                     |
| 681 | No          | 9       | 9-B  | 100    | Bozic | Inf | last   | wholeT_0.5  | S1:OT, S1:OT-A                                                        |
| 682 | No          | 9       | 9-B  | 100    | Bozic | Inf | unif   | singleC     | S1:CBN, S1:CBN-A, S1:OT, S1:OT-A                                      |

Table 7: (continued)

|     | Conjunction | Drivers | Tree | S.Size | Model | sh  | S.Time | S.Type      | Best method(s)                                                                       |
|-----|-------------|---------|------|--------|-------|-----|--------|-------------|--------------------------------------------------------------------------------------|
| 683 | No          | 9       | 9-B  | 100    | Bozic | Inf | unif   | wholeT_0.01 | S1:CBN, S1:CBN-A, S1:OT, S1:OT-A, S5:CBN                                             |
| 684 | No          | 9       | 9-B  | 100    | Bozic | Inf | unif   | wholeT_0.5  | S1:CBN, S1:CBN-A, S1:OT, S1:OT-A                                                     |
| 685 | No          | 9       | 9-B  | 100    | exp   | 0   | last   | singleC     | S1:OT, S1:OT-A                                                                       |
| 686 | No          | 9       | 9-B  | 100    | exp   | 0   | last   | wholeT_0.01 | S1:CBN-A, S1:OT, S1:OT-A                                                             |
| 687 | No          | 9       | 9-B  | 100    | exp   | 0   | last   | wholeT_0.5  | S1:OT, S1:OT-A                                                                       |
| 688 | No          | 9       | 9-B  | 100    | exp   | 0   | unif   | singleC     | none                                                                                 |
| 689 | No          | 9       | 9-B  | 100    | exp   | 0   | unif   | wholeT_0.01 | S1:CBN, S1:CBN-A, S1:OT, S1:OT-A                                                     |
| 690 | No          | 9       | 9-B  | 100    | exp   | 0   | unif   | wholeT_0.5  | none                                                                                 |
| 691 | No          | 9       | 9-B  | 100    | exp   | Inf | last   | singleC     | S1:CBN, S1:OT, S1:OT-A, S5:OT, S5:OT-A                                               |
| 692 | No          | 9       | 9-B  | 100    | exp   | Inf | last   | wholeT_0.01 | J1:CBN-A, J1:OT, J1:OT-A, S1:CBN, S1:CBN-A, S1:OT, S1:OT-A, S5:CBN-A, S5:OT, S5:OT-A |
| 693 | No          | 9       | 9-B  | 100    | exp   | Inf | last   | wholeT_0.5  | S1:OT, S1:OT-A, S5:OT, S5:OT-A                                                       |
| 694 | No          | 9       | 9-B  | 100    | exp   | Inf | unif   | singleC     | S1:CBN, S1:CBN-A, S1:OT, S1:OT-A                                                     |
| 695 | No          | 9       | 9-B  | 100    | exp   | Inf | unif   | wholeT_0.01 | J1:CBN, J1:CBN-A, S1:CBN, S1:CBN-A, S1:OT, S1:OT-A                                   |
| 696 | No          | 9       | 9-B  | 100    | exp   | Inf | unif   | wholeT_0.5  | S1:CBN, S1:CBN-A, S1:OT, S1:OT-A                                                     |
| 697 | No          | 9       | 9-B  | 100    | McF_4 | 0   | last   | singleC     | S1:OT, S1:OT-A                                                                       |
| 698 | No          | 9       | 9-B  | 100    | McF_4 | 0   | last   | wholeT_0.01 | S1:OT, S1:OT-A, S5:OT, S5:OT-A                                                       |
| 699 | No          | 9       | 9-B  | 100    | McF_4 | 0   | last   | wholeT_0.5  | S1:OT, S1:OT-A                                                                       |
| 700 | No          | 9       | 9-B  | 100    | McF_4 | 0   | unif   | singleC     | S1:CBN, S1:CBN-A, S1:OT, S1:OT-A                                                     |
| 701 | No          | 9       | 9-B  | 100    | McF_4 | 0   | unif   | wholeT_0.01 | S1:CBN, S1:CBN-A, S1:OT, S1:OT-A                                                     |
| 702 | No          | 9       | 9-B  | 100    | McF_4 | 0   | unif   | wholeT_0.5  | S1:OT, S1:OT-A                                                                       |
| 703 | No          | 9       | 9-B  | 100    | McF_4 | Inf | last   | singleC     | S1:OT, S1:OT-A                                                                       |
| 704 | No          | 9       | 9-B  | 100    | McF_4 | Inf | last   | wholeT_0.01 | S1:OT, S1:OT-A, S5:OT, S5:OT-A                                                       |
| 705 | No          | 9       | 9-B  | 100    | McF_4 | Inf | last   | wholeT_0.5  | S1:OT, S1:OT-A                                                                       |
| 706 | No          | 9       | 9-B  | 100    | McF_4 | Inf | unif   | singleC     | S1:CBN-A, S1:OT, S1:OT-A                                                             |
| 707 | No          | 9       | 9-B  | 100    | McF_4 | Inf | unif   | wholeT_0.01 | S1:OT, S1:OT-A                                                                       |
| 708 | No          | 9       | 9-B  | 100    | McF_4 | Inf | unif   | wholeT_0.5  | S1:OT, S1:OT-A                                                                       |
| 709 | No          | 9       | 9-B  | 100    | McF_6 | 0   | last   | singleC     | S1:OT-A, S5:OT-A                                                                     |
| 710 | No          | 9       | 9-B  | 100    | McF_6 | 0   | last   | wholeT_0.01 | J1:OT-A, S1:OT-A, S5:OT-A                                                            |
| 711 | No          | 9       | 9-B  | 100    | McF_6 | 0   | last   | wholeT_0.5  | S1:OT-A, S5:OT-A                                                                     |
| 712 | No          | 9       | 9-B  | 100    | McF_6 | 0   | unif   | singleC     | S1:OT, S1:OT-A                                                                       |
| 713 | No          | 9       | 9-B  | 100    | McF_6 | 0   | unif   | wholeT_0.01 | S1:OT, S1:OT-A                                                                       |
| 714 | No          | 9       | 9-B  | 100    | McF_6 | 0   | unif   | wholeT_0.5  | S1:OT, S1:OT-A                                                                       |
| 715 | No          | 9       | 9-B  | 100    | McF_6 | Inf | last   | singleC     | S1:OT-A, S5:OT-A                                                                     |
| 716 | No          | 9       | 9-B  | 100    | McF_6 | Inf | last   | wholeT_0.01 | S1:OT-A, S5:OT-A                                                                     |
| 717 | No          | 9       | 9-B  | 100    | McF_6 | Inf | last   | wholeT_0.5  | S1:OT-A, S5:OT-A                                                                     |

Table 7: (continued)

|     | Conjunction | Drivers | Tree | S.Size | Model | sh  | S.Time | S.Type      | Best method(s)                                                                                                                                  |
|-----|-------------|---------|------|--------|-------|-----|--------|-------------|-------------------------------------------------------------------------------------------------------------------------------------------------|
| 718 | No          | 9       | 9-B  | 100    | McF_6 | Inf | unif   | singleC     | S1:OT, S1:OT-A                                                                                                                                  |
| 719 | No          | 9       | 9-B  | 100    | McF_6 | Inf | unif   | wholeT_0.01 | S1:CBN, S1:OT, S1:OT-A                                                                                                                          |
| 720 | No          | 9       | 9-B  | 100    | McF_6 | Inf | unif   | wholeT_0.5  | S1:OT, S1:OT-A                                                                                                                                  |
| 721 | No          | 7       | 7-B  | 1000   | Bozic | 0   | last   | singleC     | S1:OT-A, S5:OT-A                                                                                                                                |
| 722 | No          | 7       | 7-B  | 1000   | Bozic | 0   | last   | wholeT_0.01 | J1:DiP-A, J1:OT-A, J5:DiP-A, J5:OT-A,<br>S1:DiP-A, S1:OT-A, S5:DiP-A, S5:OT-A                                                                   |
| 723 | No          | 7       | 7-B  | 1000   | Bozic | 0   | last   | wholeT_0.5  | S1:OT-A                                                                                                                                         |
| 724 | No          | 7       | 7-B  | 1000   | Bozic | 0   | unif   | singleC     | S1:OT, S1:OT-A                                                                                                                                  |
| 725 | No          | 7       | 7-B  | 1000   | Bozic | 0   | unif   | wholeT_0.01 | S1:CBN, S1:CBN-A, S1:DiP, S1:DiP-A,<br>S1:OT, S1:OT-A                                                                                           |
| 726 | No          | 7       | 7-B  | 1000   | Bozic | 0   | unif   | wholeT_0.5  | J1:CBN, J1:CBN-A, J1:OT, J1:OT-A,<br>S1:CBN, S1:CBN-A, S1:OT, S1:OT-A                                                                           |
| 727 | No          | 7       | 7-B  | 1000   | Bozic | Inf | last   | singleC     | S1:DiP-A, S1:OT-A                                                                                                                               |
| 728 | No          | 7       | 7-B  | 1000   | Bozic | Inf | last   | wholeT_0.01 | J1:DiP-A, J1:OT-A, S1:DiP-A, S1:OT-A,<br>S5:DiP-A, S5:OT-A                                                                                      |
| 729 | No          | 7       | 7-B  | 1000   | Bozic | Inf | last   | wholeT_0.5  | S1:DiP-A, S1:OT-A                                                                                                                               |
| 730 | No          | 7       | 7-B  | 1000   | Bozic | Inf | unif   | singleC     | S1:CBN, S1:CBN-A, S1:OT, S1:OT-A                                                                                                                |
| 731 | No          | 7       | 7-B  | 1000   | Bozic | Inf | unif   | wholeT_0.01 | J1:CBN, J1:CBN-A, J1:OT, J1:OT-A,<br>S1:CBN, S1:CBN-A, S1:OT, S1:OT-A                                                                           |
| 732 | No          | 7       | 7-B  | 1000   | Bozic | Inf | unif   | wholeT_0.5  | S1:CBN, S1:CBN-A, S1:OT, S1:OT-A                                                                                                                |
| 733 | No          | 7       | 7-B  | 1000   | exp   | 0   | last   | singleC     | S1:OT-A                                                                                                                                         |
| 734 | No          | 7       | 7-B  | 1000   | exp   | 0   | last   | wholeT_0.01 | J1:OT-A, S1:OT-A, S5:OT-A                                                                                                                       |
| 735 | No          | 7       | 7-B  | 1000   | exp   | 0   | last   | wholeT_0.5  | S1:CBN-A, S1:OT-A                                                                                                                               |
| 736 | No          | 7       | 7-B  | 1000   | exp   | 0   | unif   | singleC     | none                                                                                                                                            |
| 737 | No          | 7       | 7-B  | 1000   | exp   | 0   | unif   | wholeT_0.01 | S1:CBN-A, S1:OT, S1:OT-A                                                                                                                        |
| 738 | No          | 7       | 7-B  | 1000   | exp   | 0   | unif   | wholeT_0.5  | none                                                                                                                                            |
| 739 | No          | 7       | 7-B  | 1000   | exp   | Inf | last   | singleC     | S1:OT-A                                                                                                                                         |
| 740 | No          | 7       | 7-B  | 1000   | exp   | Inf | last   | wholeT_0.01 | S1:OT-A, S5:OT-A                                                                                                                                |
| 741 | No          | 7       | 7-B  | 1000   | exp   | Inf | last   | wholeT_0.5  | S1:OT-A, S5:OT-A                                                                                                                                |
| 742 | No          | 7       | 7-B  | 1000   | exp   | Inf | unif   | singleC     | S1:CBN, S1:OT, S1:OT-A                                                                                                                          |
| 743 | No          | 7       | 7-B  | 1000   | exp   | Inf | unif   | wholeT_0.01 | J1:CBN, J1:CBN-A, J1:OT, J1:OT-A,<br>J5:CBN, J5:CBN-A, J5:OT, J5:OT-A,<br>S1:CBN, S1:CBN-A, S1:OT, S1:OT-A,<br>S5:CBN, S5:CBN-A, S5:OT, S5:OT-A |
| 744 | No          | 7       | 7-B  | 1000   | exp   | Inf | unif   | wholeT_0.5  | S1:CBN, S1:CBN-A, S1:OT, S1:OT-A                                                                                                                |
| 745 | No          | 7       | 7-B  | 1000   | McF_4 | 0   | last   | singleC     | S1:DiP-A, S1:OT-A, S5:DiP-A, S5:OT-A                                                                                                            |
| 746 | No          | 7       | 7-B  | 1000   | McF_4 | 0   | last   | wholeT_0.01 | S1:DiP-A, S1:OT-A, S5:DiP-A, S5:OT-A                                                                                                            |
| 747 | No          | 7       | 7-B  | 1000   | McF_4 | 0   | last   | wholeT_0.5  | S1:DiP-A, S1:OT-A, S5:DiP-A, S5:OT-A                                                                                                            |
| 748 | No          | 7       | 7-B  | 1000   | McF_4 | 0   | unif   | singleC     | S1:DiP, S1:DiP-A, S1:OT, S1:OT-A                                                                                                                |
| 749 | No          | 7       | 7-B  | 1000   | McF_4 | 0   | unif   | wholeT_0.01 | S1:DiP-A, S1:OT, S1:OT-A                                                                                                                        |

Table 7: (continued)

|     | Conjunction | Drivers | Tree | S.Size | Model | sh  | S.Time | S.Type      | Best method(s)                                                                               |
|-----|-------------|---------|------|--------|-------|-----|--------|-------------|----------------------------------------------------------------------------------------------|
| 750 | No          | 7       | 7-B  | 1000   | McF_4 | 0   | unif   | wholeT_0.5  | S1:DiP-A, S1:OT, S1:OT-A                                                                     |
| 751 | No          | 7       | 7-B  | 1000   | McF_4 | Inf | last   | singleC     | S1:DiP-A, S1:OT-A, S5:DiP-A, S5:OT-A                                                         |
| 752 | No          | 7       | 7-B  | 1000   | McF_4 | Inf | last   | wholeT_0.01 | S1:DiP-A, S1:OT-A, S5:DiP-A, S5:OT-A                                                         |
| 753 | No          | 7       | 7-B  | 1000   | McF_4 | Inf | last   | wholeT_0.5  | S1:DiP-A, S1:OT-A, S5:DiP-A, S5:OT-A                                                         |
| 754 | No          | 7       | 7-B  | 1000   | McF_4 | Inf | unif   | singleC     | S1:OT, S1:OT-A                                                                               |
| 755 | No          | 7       | 7-B  | 1000   | McF_4 | Inf | unif   | wholeT_0.01 | S1:OT, S1:OT-A                                                                               |
| 756 | No          | 7       | 7-B  | 1000   | McF_4 | Inf | unif   | wholeT_0.5  | S1:OT, S1:OT-A                                                                               |
| 757 | No          | 7       | 7-B  | 1000   | McF_6 | 0   | last   | singleC     | J1:DiP-A, J1:OT-A, S1:DiP-A, S1:OT-A,<br>S5:DiP-A, S5:OT-A                                   |
| 758 | No          | 7       | 7-B  | 1000   | McF_6 | 0   | last   | wholeT_0.01 | J1:DiP-A, J1:OT-A, J5:DiP-A, J5:OT-A,<br>S1:DiP-A, S1:OT-A, S5:DiP-A, S5:OT-A                |
| 759 | No          | 7       | 7-B  | 1000   | McF_6 | 0   | last   | wholeT_0.5  | J1:DiP-A, J1:OT-A, S1:DiP-A, S1:OT-A,<br>S5:DiP-A, S5:OT-A                                   |
| 760 | No          | 7       | 7-B  | 1000   | McF_6 | 0   | unif   | singleC     | S1:DiP, S1:DiP-A, S1:OT, S1:OT-A,<br>S5:DiP, S5:DiP-A, S5:OT, S5:OT-A                        |
| 761 | No          | 7       | 7-B  | 1000   | McF_6 | 0   | unif   | wholeT_0.01 | S1:DiP, S1:DiP-A, S1:OT, S1:OT-A,<br>S5:DiP, S5:DiP-A, S5:OT, S5:OT-A                        |
| 762 | No          | 7       | 7-B  | 1000   | McF_6 | 0   | unif   | wholeT_0.5  | S1:DiP, S1:DiP-A, S1:OT, S1:OT-A,<br>S5:DiP, S5:DiP-A, S5:OT, S5:OT-A                        |
| 763 | No          | 7       | 7-B  | 1000   | McF_6 | Inf | last   | singleC     | J1:DiP-A, J1:OT-A, S1:DiP-A, S1:OT-A,<br>S5:DiP-A, S5:OT-A                                   |
| 764 | No          | 7       | 7-B  | 1000   | McF_6 | Inf | last   | wholeT_0.01 | J1:DiP-A, J1:OT-A, J5:DiP-A, J5:OT-A,<br>S1:DiP-A, S1:OT-A, S5:DiP-A, S5:OT-A                |
| 765 | No          | 7       | 7-B  | 1000   | McF_6 | Inf | last   | wholeT_0.5  | J1:DiP-A, J1:OT-A, S1:DiP-A, S1:OT-A,<br>S5:DiP-A, S5:OT-A                                   |
| 766 | No          | 7       | 7-B  | 1000   | McF_6 | Inf | unif   | singleC     | S1:DiP-A, S1:OT, S1:OT-A, S5:DiP-A,<br>S5:OT, S5:OT-A                                        |
| 767 | No          | 7       | 7-B  | 1000   | McF_6 | Inf | unif   | wholeT_0.01 | S1:DiP-A, S1:OT, S1:OT-A, S5:DiP-A,<br>S5:OT, S5:OT-A                                        |
| 768 | No          | 7       | 7-B  | 1000   | McF_6 | Inf | unif   | wholeT_0.5  | S1:DiP-A, S1:OT, S1:OT-A, S5:DiP-A,<br>S5:OT, S5:OT-A                                        |
| 769 | No          | 7       | 7-B  | 200    | Bozic | 0   | last   | singleC     | S1:OT-A, S5:OT-A                                                                             |
| 770 | No          | 7       | 7-B  | 200    | Bozic | 0   | last   | wholeT_0.01 | S1:OT-A                                                                                      |
| 771 | No          | 7       | 7-B  | 200    | Bozic | 0   | last   | wholeT_0.5  | S1:OT-A                                                                                      |
| 772 | No          | 7       | 7-B  | 200    | Bozic | 0   | unif   | singleC     | S1:CBN, S1:CBN-A, S1:OT, S1:OT-A                                                             |
| 773 | No          | 7       | 7-B  | 200    | Bozic | 0   | unif   | wholeT_0.01 | J1:CBN, J1:CBN-A, J1:OT-A, S1:CBN,<br>S1:CBN-A, S1:OT, S1:OT-A, S5:CBN,<br>S5:CBN-A, S5:OT-A |
| 774 | No          | 7       | 7-B  | 200    | Bozic | 0   | unif   | wholeT_0.5  | S1:CBN, S1:CBN-A, S1:OT, S1:OT-A                                                             |
| 775 | No          | 7       | 7-B  | 200    | Bozic | Inf | last   | singleC     | S1:OT-A                                                                                      |



Table 7: (continued)

|     | Conjunction | Drivers | Tree | S.Size | Model | sh  | S.Time | S.Type      | Best method(s)                                                                |
|-----|-------------|---------|------|--------|-------|-----|--------|-------------|-------------------------------------------------------------------------------|
| 776 | No          | 7       | 7-B  | 200    | Bozic | Inf | last   | wholeT_0.01 | J1:OT-A, S1:OT-A, S5:OT-A                                                     |
| 777 | No          | 7       | 7-B  | 200    | Bozic | Inf | last   | wholeT_0.5  | S1:OT-A                                                                       |
| 778 | No          | 7       | 7-B  | 200    | Bozic | Inf | unif   | singleC     | S1:OT, S1:OT-A                                                                |
| 779 | No          | 7       | 7-B  | 200    | Bozic | Inf | unif   | wholeT_0.01 | S1:CBN, S1:CBN-A, S1:OT, S1:OT-A                                              |
| 780 | No          | 7       | 7-B  | 200    | Bozic | Inf | unif   | wholeT_0.5  | S1:CBN, S1:OT, S1:OT-A                                                        |
| 781 | No          | 7       | 7-B  | 200    | exp   | 0   | last   | singleC     | S1:OT-A                                                                       |
| 782 | No          | 7       | 7-B  | 200    | exp   | 0   | last   | wholeT_0.01 | S1:OT-A, S5:OT-A                                                              |
| 783 | No          | 7       | 7-B  | 200    | exp   | 0   | last   | wholeT_0.5  | S1:OT-A                                                                       |
| 784 | No          | 7       | 7-B  | 200    | exp   | 0   | unif   | singleC     | J1:CBN, J1:CBN-A, J1:OT, J1:OT-A,<br>S1:CBN, S1:CBN-A, S1:OT, S1:OT-A         |
| 785 | No          | 7       | 7-B  | 200    | exp   | 0   | unif   | wholeT_0.01 | S1:CBN, S1:CBN-A, S1:OT, S1:OT-A                                              |
| 786 | No          | 7       | 7-B  | 200    | exp   | 0   | unif   | wholeT_0.5  | none                                                                          |
| 787 | No          | 7       | 7-B  | 200    | exp   | Inf | last   | singleC     | S1:OT-A                                                                       |
| 788 | No          | 7       | 7-B  | 200    | exp   | Inf | last   | wholeT_0.01 | S1:OT-A, S5:OT-A                                                              |
| 789 | No          | 7       | 7-B  | 200    | exp   | Inf | last   | wholeT_0.5  | S1:OT-A                                                                       |
| 790 | No          | 7       | 7-B  | 200    | exp   | Inf | unif   | singleC     | S1:CBN, S1:CBN-A, S1:OT, S1:OT-A                                              |
| 791 | No          | 7       | 7-B  | 200    | exp   | Inf | unif   | wholeT_0.01 | J1:OT, J1:OT-A, S1:CBN, S1:CBN-A,<br>S1:OT, S1:OT-A                           |
| 792 | No          | 7       | 7-B  | 200    | exp   | Inf | unif   | wholeT_0.5  | S1:CBN, S1:OT, S1:OT-A                                                        |
| 793 | No          | 7       | 7-B  | 200    | McF_4 | 0   | last   | singleC     | S1:OT-A, S5:OT-A                                                              |
| 794 | No          | 7       | 7-B  | 200    | McF_4 | 0   | last   | wholeT_0.01 | S1:OT-A, S5:OT-A                                                              |
| 795 | No          | 7       | 7-B  | 200    | McF_4 | 0   | last   | wholeT_0.5  | S1:OT-A, S5:OT-A                                                              |
| 796 | No          | 7       | 7-B  | 200    | McF_4 | 0   | unif   | singleC     | S1:OT, S1:OT-A                                                                |
| 797 | No          | 7       | 7-B  | 200    | McF_4 | 0   | unif   | wholeT_0.01 | S1:OT, S1:OT-A                                                                |
| 798 | No          | 7       | 7-B  | 200    | McF_4 | 0   | unif   | wholeT_0.5  | S1:OT, S1:OT-A                                                                |
| 799 | No          | 7       | 7-B  | 200    | McF_4 | Inf | last   | singleC     | S1:OT-A, S5:OT-A                                                              |
| 800 | No          | 7       | 7-B  | 200    | McF_4 | Inf | last   | wholeT_0.01 | S1:OT-A, S5:OT-A                                                              |
| 801 | No          | 7       | 7-B  | 200    | McF_4 | Inf | last   | wholeT_0.5  | S1:OT-A, S5:OT-A                                                              |
| 802 | No          | 7       | 7-B  | 200    | McF_4 | Inf | unif   | singleC     | S1:OT, S1:OT-A                                                                |
| 803 | No          | 7       | 7-B  | 200    | McF_4 | Inf | unif   | wholeT_0.01 | S1:OT, S1:OT-A                                                                |
| 804 | No          | 7       | 7-B  | 200    | McF_4 | Inf | unif   | wholeT_0.5  | S1:OT, S1:OT-A                                                                |
| 805 | No          | 7       | 7-B  | 200    | McF_6 | 0   | last   | singleC     | J1:OT-A, J5:OT-A, S1:OT-A, S5:OT-A                                            |
| 806 | No          | 7       | 7-B  | 200    | McF_6 | 0   | last   | wholeT_0.01 | J1:DiP-A, J1:OT-A, J5:DiP-A, J5:OT-A,<br>S1:DiP-A, S1:OT-A, S5:DiP-A, S5:OT-A |
| 807 | No          | 7       | 7-B  | 200    | McF_6 | 0   | last   | wholeT_0.5  | J1:OT-A, S1:OT-A, S5:OT-A                                                     |
| 808 | No          | 7       | 7-B  | 200    | McF_6 | 0   | unif   | singleC     | S1:OT, S1:OT-A, S5:OT, S5:OT-A                                                |
| 809 | No          | 7       | 7-B  | 200    | McF_6 | 0   | unif   | wholeT_0.01 | J1:OT-A, S1:OT, S1:OT-A, S5:OT,<br>S5:OT-A                                    |
| 810 | No          | 7       | 7-B  | 200    | McF_6 | 0   | unif   | wholeT_0.5  | S1:OT, S1:OT-A, S5:OT, S5:OT-A                                                |
| 811 | No          | 7       | 7-B  | 200    | McF_6 | Inf | last   | singleC     | J1:OT-A, J5:OT-A, S1:OT-A, S5:OT-A                                            |

Table 7: (continued)

|     | Conjunction | Drivers | Tree | S.Size | Model | sh  | S.Time | S.Type      | Best method(s)                                                     |
|-----|-------------|---------|------|--------|-------|-----|--------|-------------|--------------------------------------------------------------------|
| 812 | No          | 7       | 7-B  | 200    | McF_6 | Inf | last   | wholeT_0.01 | J1:OT-A, J5:OT-A, S1:OT-A, S5:OT-A                                 |
| 813 | No          | 7       | 7-B  | 200    | McF_6 | Inf | last   | wholeT_0.5  | J1:OT-A, S1:OT-A, S5:OT-A                                          |
| 814 | No          | 7       | 7-B  | 200    | McF_6 | Inf | unif   | singleC     | S1:OT, S1:OT-A, S5:OT, S5:OT-A                                     |
| 815 | No          | 7       | 7-B  | 200    | McF_6 | Inf | unif   | wholeT_0.01 | S1:OT, S1:OT-A, S5:OT, S5:OT-A                                     |
| 816 | No          | 7       | 7-B  | 200    | McF_6 | Inf | unif   | wholeT_0.5  | J1:OT-A, S1:OT, S1:OT-A, S5:OT, S5:OT-A                            |
| 817 | No          | 7       | 7-B  | 100    | Bozic | 0   | last   | singleC     | S1:OT-A                                                            |
| 818 | No          | 7       | 7-B  | 100    | Bozic | 0   | last   | wholeT_0.01 | S1:OT-A                                                            |
| 819 | No          | 7       | 7-B  | 100    | Bozic | 0   | last   | wholeT_0.5  | S1:OT-A                                                            |
| 820 | No          | 7       | 7-B  | 100    | Bozic | 0   | unif   | singleC     | S1:CBN, S1:CBN-A, S1:OT, S1:OT-A                                   |
| 821 | No          | 7       | 7-B  | 100    | Bozic | 0   | unif   | wholeT_0.01 | S1:CBN, S1:CBN-A, S1:OT, S1:OT-A                                   |
| 822 | No          | 7       | 7-B  | 100    | Bozic | 0   | unif   | wholeT_0.5  | S1:CBN, S1:CBN-A, S1:OT, S1:OT-A                                   |
| 823 | No          | 7       | 7-B  | 100    | Bozic | Inf | last   | singleC     | S1:OT-A                                                            |
| 824 | No          | 7       | 7-B  | 100    | Bozic | Inf | last   | wholeT_0.01 | S1:CBN-A, S1:OT-A, S5:OT-A                                         |
| 825 | No          | 7       | 7-B  | 100    | Bozic | Inf | last   | wholeT_0.5  | S1:OT-A                                                            |
| 826 | No          | 7       | 7-B  | 100    | Bozic | Inf | unif   | singleC     | S1:CBN-A, S1:OT, S1:OT-A                                           |
| 827 | No          | 7       | 7-B  | 100    | Bozic | Inf | unif   | wholeT_0.01 | J1:CBN, J1:CBN-A, J1:OT, J1:OT-A, S1:CBN, S1:CBN-A, S1:OT, S1:OT-A |
| 828 | No          | 7       | 7-B  | 100    | Bozic | Inf | unif   | wholeT_0.5  | S1:CBN-A, S1:OT, S1:OT-A                                           |
| 829 | No          | 7       | 7-B  | 100    | exp   | 0   | last   | singleC     | S1:OT-A                                                            |
| 830 | No          | 7       | 7-B  | 100    | exp   | 0   | last   | wholeT_0.01 | S1:OT-A, S5:OT-A                                                   |
| 831 | No          | 7       | 7-B  | 100    | exp   | 0   | last   | wholeT_0.5  | S1:OT-A                                                            |
| 832 | No          | 7       | 7-B  | 100    | exp   | 0   | unif   | singleC     | J1:CBN, J1:CBN-A, J1:OT, J1:OT-A, S1:CBN, S1:CBN-A, S1:OT, S1:OT-A |
| 833 | No          | 7       | 7-B  | 100    | exp   | 0   | unif   | wholeT_0.01 | S1:CBN, S1:CBN-A, S1:OT, S1:OT-A                                   |
| 834 | No          | 7       | 7-B  | 100    | exp   | 0   | unif   | wholeT_0.5  | J1:CBN, J1:CBN-A, J1:OT, J1:OT-A, S1:CBN, S1:CBN-A, S1:OT, S1:OT-A |
| 835 | No          | 7       | 7-B  | 100    | exp   | Inf | last   | singleC     | S1:OT-A                                                            |
| 836 | No          | 7       | 7-B  | 100    | exp   | Inf | last   | wholeT_0.01 | S1:OT-A, S5:OT-A                                                   |
| 837 | No          | 7       | 7-B  | 100    | exp   | Inf | last   | wholeT_0.5  | S1:OT-A                                                            |
| 838 | No          | 7       | 7-B  | 100    | exp   | Inf | unif   | singleC     | S1:CBN-A, S1:OT, S1:OT-A                                           |
| 839 | No          | 7       | 7-B  | 100    | exp   | Inf | unif   | wholeT_0.01 | S1:CBN, S1:CBN-A, S1:OT, S1:OT-A                                   |
| 840 | No          | 7       | 7-B  | 100    | exp   | Inf | unif   | wholeT_0.5  | S1:CBN, S1:CBN-A, S1:OT, S1:OT-A                                   |
| 841 | No          | 7       | 7-B  | 100    | McF_4 | 0   | last   | singleC     | S1:OT-A, S5:OT-A                                                   |
| 842 | No          | 7       | 7-B  | 100    | McF_4 | 0   | last   | wholeT_0.01 | S1:OT-A, S5:OT-A                                                   |
| 843 | No          | 7       | 7-B  | 100    | McF_4 | 0   | last   | wholeT_0.5  | S1:OT-A                                                            |
| 844 | No          | 7       | 7-B  | 100    | McF_4 | 0   | unif   | singleC     | S1:OT, S1:OT-A                                                     |
| 845 | No          | 7       | 7-B  | 100    | McF_4 | 0   | unif   | wholeT_0.01 | S1:OT, S1:OT-A                                                     |
| 846 | No          | 7       | 7-B  | 100    | McF_4 | 0   | unif   | wholeT_0.5  | S1:OT, S1:OT-A                                                     |
| 847 | No          | 7       | 7-B  | 100    | McF_4 | Inf | last   | singleC     | S1:OT-A                                                            |

Table 7: (continued)

|     | Conjunction | Drivers | Tree | S.Size | Model | sh  | S.Time | S.Type      | Best method(s)                             |
|-----|-------------|---------|------|--------|-------|-----|--------|-------------|--------------------------------------------|
| 848 | No          | 7       | 7-B  | 100    | McF_4 | Inf | last   | wholeT_0.01 | S1:OT-A, S5:OT-A                           |
| 849 | No          | 7       | 7-B  | 100    | McF_4 | Inf | last   | wholeT_0.5  | S1:OT-A, S5:OT-A                           |
| 850 | No          | 7       | 7-B  | 100    | McF_4 | Inf | unif   | singleC     | S1:OT, S1:OT-A                             |
| 851 | No          | 7       | 7-B  | 100    | McF_4 | Inf | unif   | wholeT_0.01 | S1:OT, S1:OT-A                             |
| 852 | No          | 7       | 7-B  | 100    | McF_4 | Inf | unif   | wholeT_0.5  | S1:OT, S1:OT-A                             |
| 853 | No          | 7       | 7-B  | 100    | McF_6 | 0   | last   | singleC     | J1:OT-A, J5:OT-A, S1:OT-A, S5:OT-A         |
| 854 | No          | 7       | 7-B  | 100    | McF_6 | 0   | last   | wholeT_0.01 | J1:OT-A, J5:OT-A, S1:OT-A, S5:OT-A         |
| 855 | No          | 7       | 7-B  | 100    | McF_6 | 0   | last   | wholeT_0.5  | J1:OT-A, S1:OT-A, S5:OT-A                  |
| 856 | No          | 7       | 7-B  | 100    | McF_6 | 0   | unif   | singleC     | S1:OT, S1:OT-A, S5:OT, S5:OT-A             |
| 857 | No          | 7       | 7-B  | 100    | McF_6 | 0   | unif   | wholeT_0.01 | J1:OT-A, S1:OT, S1:OT-A, S5:OT,<br>S5:OT-A |
| 858 | No          | 7       | 7-B  | 100    | McF_6 | 0   | unif   | wholeT_0.5  | S1:OT, S1:OT-A, S5:OT, S5:OT-A             |
| 859 | No          | 7       | 7-B  | 100    | McF_6 | Inf | last   | singleC     | J1:OT-A, S1:OT-A, S5:OT-A                  |
| 860 | No          | 7       | 7-B  | 100    | McF_6 | Inf | last   | wholeT_0.01 | J1:OT-A, J5:OT-A, S1:OT-A, S5:OT-A         |
| 861 | No          | 7       | 7-B  | 100    | McF_6 | Inf | last   | wholeT_0.5  | J1:OT-A, S1:OT-A, S5:OT-A                  |
| 862 | No          | 7       | 7-B  | 100    | McF_6 | Inf | unif   | singleC     | S1:OT, S1:OT-A, S5:OT, S5:OT-A             |
| 863 | No          | 7       | 7-B  | 100    | McF_6 | Inf | unif   | wholeT_0.01 | S1:OT-A, S5:OT-A                           |
| 864 | No          | 7       | 7-B  | 100    | McF_6 | Inf | unif   | wholeT_0.5  | S1:OT, S1:OT-A, S5:OT, S5:OT-A             |

### 3.4 Confidence sets (MCB-2), FPF, Drivers Unknown

Table 8: Confidence sets (method MCB-2) when Drivers are Unknown for measure FPF.

|    | Conjunction | Drivers | Tree | S.Size | Model | sh  | S.Time | S.Type      | Best method(s)                                                                                                                                                             |
|----|-------------|---------|------|--------|-------|-----|--------|-------------|----------------------------------------------------------------------------------------------------------------------------------------------------------------------------|
| 1  | Yes         | 11      | 11-A | 1000   | Bozic | 0   | last   | singleC     | J1:DiP, J1:DiP-A, J1:OT, J1:OT-A, J5:DiP, J5:DiP-A, J5:OT, J5:OT-A, S1:OT, S1:OT-A, S5:OT, S5:OT-A                                                                         |
| 2  | Yes         | 11      | 11-A | 1000   | Bozic | 0   | last   | wholeT_0.01 | J1:DiP, J1:DiP-A, J5:DiP, J5:DiP-A, S1:DiP, S1:DiP-A, S5:DiP, S5:DiP-A                                                                                                     |
| 3  | Yes         | 11      | 11-A | 1000   | Bozic | 0   | last   | wholeT_0.5  | J1:DiP, J1:DiP-A, J1:OT, J1:OT-A, J5:DiP, J5:DiP-A, J5:OT, J5:OT-A, S1:OT, S1:OT-A, S5:DiP, S5:DiP-A, S5:OT, S5:OT-A                                                       |
| 4  | Yes         | 11      | 11-A | 1000   | Bozic | 0   | unif   | singleC     | J1:DiP, J1:DiP-A, J1:OT, J1:OT-A, J5:CBN, J5:CBN-A, J5:DiP, J5:DiP-A, J5:OT, J5:OT-A, S1:DiP, S1:DiP-A, S1:OT, S1:OT-A, S5:DiP, S5:DiP-A, S5:OT, S5:OT-A                   |
| 5  | Yes         | 11      | 11-A | 1000   | Bozic | 0   | unif   | wholeT_0.01 | J5:DiP, J5:DiP-A, J5:OT, J5:OT-A                                                                                                                                           |
| 6  | Yes         | 11      | 11-A | 1000   | Bozic | 0   | unif   | wholeT_0.5  | J1:CBN, J1:CBN-A, J1:DiP, J1:DiP-A, J1:OT, J1:OT-A, J5:CBN, J5:CBN-A, J5:DiP, J5:DiP-A, J5:OT, J5:OT-A, S1:DiP, S1:DiP-A, S1:OT, S1:OT-A, S5:DiP, S5:DiP-A, S5:OT, S5:OT-A |
| 7  | Yes         | 11      | 11-A | 1000   | Bozic | Inf | last   | singleC     | J1:DiP, J1:DiP-A, J1:OT, J1:OT-A, J5:DiP, J5:DiP-A, J5:OT, J5:OT-A, S1:DiP-A, S5:DiP, S5:DiP-A, S5:OT, S5:OT-A                                                             |
| 8  | Yes         | 11      | 11-A | 1000   | Bozic | Inf | last   | wholeT_0.01 | J5:DiP, J5:DiP-A, J5:OT, J5:OT-A                                                                                                                                           |
| 9  | Yes         | 11      | 11-A | 1000   | Bozic | Inf | last   | wholeT_0.5  | J1:DiP, J1:DiP-A, J1:OT, J1:OT-A, J5:DiP, J5:DiP-A, J5:OT, J5:OT-A, S5:DiP, S5:DiP-A, S5:OT, S5:OT-A                                                                       |
| 10 | Yes         | 11      | 11-A | 1000   | Bozic | Inf | unif   | singleC     | J1:DiP, J1:DiP-A, J1:OT, J1:OT-A, J5:DiP, J5:DiP-A, J5:OT, J5:OT-A, S5:DiP, S5:DiP-A, S5:OT, S5:OT-A                                                                       |
| 11 | Yes         | 11      | 11-A | 1000   | Bozic | Inf | unif   | wholeT_0.01 | J5:DiP, J5:DiP-A, J5:OT, J5:OT-A                                                                                                                                           |
| 12 | Yes         | 11      | 11-A | 1000   | Bozic | Inf | unif   | wholeT_0.5  | J1:DiP, J1:DiP-A, J1:OT, J1:OT-A, J5:DiP, J5:DiP-A, J5:OT, J5:OT-A, S1:CBN, S5:DiP, S5:DiP-A, S5:OT, S5:OT-A                                                               |

Table 8: (continued)

|    | Conjunction | Drivers | Tree | S.Size | Model | sh  | S.Time | S.Type      | Best method(s)                                                                                                                                                             |
|----|-------------|---------|------|--------|-------|-----|--------|-------------|----------------------------------------------------------------------------------------------------------------------------------------------------------------------------|
| 13 | Yes         | 11      | 11-A | 1000   | exp   | 0   | last   | singleC     | J1:DiP, J1:DiP-A, J1:OT, J1:OT-A, J5:CBN, J5:CBN-A, J5:DiP, J5:DiP-A, J5:OT, J5:OT-A, S1:DiP, S1:DiP-A, S1:OT, S1:OT-A, S5:DiP, S5:DiP-A, S5:OT, S5:OT-A                   |
| 14 | Yes         | 11      | 11-A | 1000   | exp   | 0   | last   | wholeT_0.01 | J1:DiP, J1:DiP-A, J1:OT, J1:OT-A, J5:DiP, J5:DiP-A, J5:OT, J5:OT-A, S1:DiP-A, S1:OT, S1:OT-A, S5:DiP-A, S5:OT, S5:OT-A                                                     |
| 15 | Yes         | 11      | 11-A | 1000   | exp   | 0   | last   | wholeT_0.5  | J1:DiP, J1:DiP-A, J1:OT, J1:OT-A, J5:CBN, J5:CBN-A, J5:DiP, J5:DiP-A, J5:OT, J5:OT-A, S1:DiP, S1:DiP-A, S1:OT, S1:OT-A, S5:DiP, S5:DiP-A, S5:OT, S5:OT-A                   |
| 16 | Yes         | 11      | 11-A | 1000   | exp   | 0   | unif   | singleC     | J1:CBN, J1:CBN-A, J1:DiP, J1:DiP-A, J1:OT, J1:OT-A, J5:CBN, J5:CBN-A, J5:DiP, J5:DiP-A, J5:OT, J5:OT-A, S1:DiP, S1:DiP-A, S1:OT, S1:OT-A, S5:DiP, S5:DiP-A, S5:OT, S5:OT-A |
| 17 | Yes         | 11      | 11-A | 1000   | exp   | 0   | unif   | wholeT_0.01 | J1:DiP, J1:DiP-A, J1:OT, J1:OT-A, J5:CBN, J5:CBN-A, J5:DiP, J5:DiP-A, J5:OT, J5:OT-A, S1:DiP, S1:DiP-A, S5:DiP, S5:DiP-A, S5:OT, S5:OT-A                                   |
| 18 | Yes         | 11      | 11-A | 1000   | exp   | 0   | unif   | wholeT_0.5  | J1:CBN, J1:CBN-A, J1:DiP, J1:DiP-A, J1:OT, J1:OT-A, J5:CBN, J5:CBN-A, J5:DiP, J5:DiP-A, J5:OT, J5:OT-A, S1:DiP, S1:DiP-A, S1:OT, S1:OT-A, S5:DiP, S5:DiP-A, S5:OT, S5:OT-A |
| 19 | Yes         | 11      | 11-A | 1000   | exp   | Inf | last   | singleC     | J1:DiP, J1:DiP-A, J1:OT, J1:OT-A, J5:DiP, J5:DiP-A, J5:OT, J5:OT-A, S5:DiP, S5:DiP-A, S5:OT, S5:OT-A                                                                       |
| 20 | Yes         | 11      | 11-A | 1000   | exp   | Inf | last   | wholeT_0.01 | J5:DiP, J5:DiP-A, J5:OT, J5:OT-A, S5:DiP, S5:DiP-A, S5:OT, S5:OT-A                                                                                                         |
| 21 | Yes         | 11      | 11-A | 1000   | exp   | Inf | last   | wholeT_0.5  | J1:DiP, J1:DiP-A, J1:OT, J1:OT-A, J5:DiP, J5:DiP-A, J5:OT, J5:OT-A, S1:DiP-A, S5:DiP, S5:DiP-A, S5:OT, S5:OT-A                                                             |

Table 8: (continued)

|    | Conjunction | Drivers | Tree | S.Size | Model | sh  | S.Time | S.Type      | Best method(s)                                                                                                                                                     |
|----|-------------|---------|------|--------|-------|-----|--------|-------------|--------------------------------------------------------------------------------------------------------------------------------------------------------------------|
| 22 | Yes         | 11      | 11-A | 1000   | exp   | Inf | unif   | singleC     | J1:DiP, J1:DiP-A, J1:OT, J1:OT-A, J5:CBN, J5:CBN-A, J5:DiP, J5:DiP-A, J5:OT, J5:OT-A, S5:DiP, S5:DiP-A, S5:OT, S5:OT-A                                             |
| 23 | Yes         | 11      | 11-A | 1000   | exp   | Inf | unif   | wholeT_0.01 | J5:DiP, J5:DiP-A, J5:OT, J5:OT-A, S5:DiP, S5:DiP-A, S5:OT, S5:OT-A                                                                                                 |
| 24 | Yes         | 11      | 11-A | 1000   | exp   | Inf | unif   | wholeT_0.5  | J1:DiP, J1:DiP-A, J1:OT, J1:OT-A, J5:CBN, J5:CBN-A, J5:DiP, J5:DiP-A, J5:OT, J5:OT-A, S5:DiP, S5:DiP-A, S5:OT, S5:OT-A                                             |
| 25 | Yes         | 11      | 11-A | 1000   | McF_4 | 0   | last   | singleC     | J1:CBN, J1:DiP, J1:DiP-A, J1:OT, J1:OT-A, J5:CBN, J5:DiP, J5:DiP-A, J5:OT, J5:OT-A, S1:DiP-A, S1:OT, S1:OT-A, S5:DiP, S5:DiP-A, S5:OT, S5:OT-A                     |
| 26 | Yes         | 11      | 11-A | 1000   | McF_4 | 0   | last   | wholeT_0.01 | J1:DiP, J1:DiP-A, J1:OT, J1:OT-A, J5:CBN, J5:DiP, J5:DiP-A, J5:OT, J5:OT-A, S1:DiP-A, S5:DiP, S5:DiP-A, S5:OT, S5:OT-A                                             |
| 27 | Yes         | 11      | 11-A | 1000   | McF_4 | 0   | last   | wholeT_0.5  | J1:DiP, J1:DiP-A, J1:OT, J1:OT-A, J5:CBN, J5:DiP, J5:DiP-A, J5:OT, J5:OT-A, S1:DiP-A, S1:OT, S1:OT-A, S5:DiP, S5:DiP-A, S5:OT, S5:OT-A                             |
| 28 | Yes         | 11      | 11-A | 1000   | McF_4 | 0   | unif   | singleC     | J1:CBN, J1:CBN-A, J1:DiP, J1:DiP-A, J1:OT, J1:OT-A, J5:DiP, J5:DiP-A, J5:OT, J5:OT-A, S1:DiP, S1:DiP-A, S1:OT, S1:OT-A, S5:DiP, S5:DiP-A, S5:OT, S5:OT-A           |
| 29 | Yes         | 11      | 11-A | 1000   | McF_4 | 0   | unif   | wholeT_0.01 | J1:CBN-A, J1:DiP, J1:DiP-A, J1:OT, J1:OT-A, J5:DiP, J5:DiP-A, J5:OT, J5:OT-A, S1:DiP-A, S5:CBN-A, S5:DiP, S5:DiP-A, S5:OT, S5:OT-A                                 |
| 30 | Yes         | 11      | 11-A | 1000   | McF_4 | 0   | unif   | wholeT_0.5  | J1:CBN, J1:CBN-A, J1:DiP, J1:DiP-A, J1:OT, J1:OT-A, J5:DiP, J5:DiP-A, J5:OT, J5:OT-A, S1:DiP, S1:DiP-A, S1:OT, S1:OT-A, S5:CBN-A, S5:DiP, S5:DiP-A, S5:OT, S5:OT-A |

Table 8: (continued)

|    | Conjunction | Drivers | Tree | S.Size | Model | sh  | S.Time | S.Type      | Best method(s)                                                                                                                                                                               |
|----|-------------|---------|------|--------|-------|-----|--------|-------------|----------------------------------------------------------------------------------------------------------------------------------------------------------------------------------------------|
| 31 | Yes         | 11      | 11-A | 1000   | McF_4 | Inf | last   | singleC     | J1:DiP, J1:DiP-A, J1:OT, J1:OT-A, J5:DiP, J5:DiP-A, J5:OT, J5:OT-A, S1:OT, S1:OT-A, S5:DiP, S5:DiP-A, S5:OT, S5:OT-A                                                                         |
| 32 | Yes         | 11      | 11-A | 1000   | McF_4 | Inf | last   | wholeT_0.01 | J1:DiP, J1:DiP-A, J1:OT, J1:OT-A, J5:DiP, J5:DiP-A, J5:OT, J5:OT-A, S5:DiP, S5:DiP-A, S5:OT, S5:OT-A                                                                                         |
| 33 | Yes         | 11      | 11-A | 1000   | McF_4 | Inf | last   | wholeT_0.5  | J1:DiP, J1:DiP-A, J1:OT, J1:OT-A, J5:DiP, J5:DiP-A, J5:OT, J5:OT-A, S1:DiP-A, S1:OT, S1:OT-A, S5:DiP, S5:DiP-A, S5:OT, S5:OT-A                                                               |
| 34 | Yes         | 11      | 11-A | 1000   | McF_4 | Inf | unif   | singleC     | J1:CBN-A, J1:DiP, J1:DiP-A, J1:OT, J1:OT-A, J5:DiP, J5:DiP-A, J5:OT, J5:OT-A, S1:DiP, S1:DiP-A, S1:OT, S1:OT-A, S5:CBN-A, S5:DiP, S5:DiP-A, S5:OT, S5:OT-A                                   |
| 35 | Yes         | 11      | 11-A | 1000   | McF_4 | Inf | unif   | wholeT_0.01 | J1:CBN-A, J1:DiP, J1:DiP-A, J1:OT, J1:OT-A, J5:DiP, J5:DiP-A, J5:OT, J5:OT-A, S5:CBN-A, S5:DiP, S5:DiP-A, S5:OT, S5:OT-A                                                                     |
| 36 | Yes         | 11      | 11-A | 1000   | McF_4 | Inf | unif   | wholeT_0.5  | J1:CBN-A, J1:DiP, J1:DiP-A, J1:OT, J1:OT-A, J5:DiP, J5:DiP-A, J5:OT, J5:OT-A, S1:DiP, S1:DiP-A, S1:OT, S1:OT-A, S5:CBN-A, S5:DiP, S5:DiP-A, S5:OT, S5:OT-A                                   |
| 37 | Yes         | 11      | 11-A | 1000   | McF_6 | 0   | last   | singleC     | J1:DiP, J1:OT, J5:DiP, J5:OT, S1:DiP, S1:OT, S5:DiP, S5:OT                                                                                                                                   |
| 38 | Yes         | 11      | 11-A | 1000   | McF_6 | 0   | last   | wholeT_0.01 | J1:DiP, J1:OT, J5:DiP, J5:OT, S1:DiP, S5:DiP, S5:OT                                                                                                                                          |
| 39 | Yes         | 11      | 11-A | 1000   | McF_6 | 0   | last   | wholeT_0.5  | J1:DiP, J1:OT, J5:DiP, J5:OT, S1:DiP, S1:OT, S5:DiP, S5:OT                                                                                                                                   |
| 40 | Yes         | 11      | 11-A | 1000   | McF_6 | 0   | unif   | singleC     | J1:CBN, J1:CBN-A, J1:DiP, J1:DiP-A, J1:OT, J1:OT-A, J5:CBN, J5:CBN-A, J5:DiP, J5:DiP-A, J5:OT, J5:OT-A, S1:DiP, S1:DiP-A, S1:OT, S1:OT-A, S5:CBN, S5:CBN-A, S5:DiP, S5:DiP-A, S5:OT, S5:OT-A |

Table 8: (continued)

|    | Conjunction | Drivers | Tree | S.Size | Model | sh  | S.Time | S.Type      | Best method(s)                                                                                                                                                                               |
|----|-------------|---------|------|--------|-------|-----|--------|-------------|----------------------------------------------------------------------------------------------------------------------------------------------------------------------------------------------|
| 41 | Yes         | 11      | 11-A | 1000   | McF_6 | 0   | unif   | wholeT_0.01 | J1:CBN, J1:CBN-A, J1:DiP, J1:DiP-A, J1:OT, J1:OT-A, J5:CBN, J5:CBN-A, J5:DiP, J5:DiP-A, J5:OT, J5:OT-A, S1:DiP, S1:DiP-A, S5:CBN, S5:CBN-A, S5:DiP, S5:DiP-A, S5:OT, S5:OT-A                 |
| 42 | Yes         | 11      | 11-A | 1000   | McF_6 | 0   | unif   | wholeT_0.5  | J1:CBN, J1:CBN-A, J1:DiP, J1:DiP-A, J1:OT, J1:OT-A, J5:CBN, J5:CBN-A, J5:DiP, J5:DiP-A, J5:OT, J5:OT-A, S1:DiP, S1:DiP-A, S1:OT, S1:OT-A, S5:CBN, S5:CBN-A, S5:DiP, S5:DiP-A, S5:OT, S5:OT-A |
| 43 | Yes         | 11      | 11-A | 1000   | McF_6 | Inf | last   | singleC     | J1:DiP, J1:OT, J5:DiP, J5:OT, S1:DiP, S5:DiP, S5:OT                                                                                                                                          |
| 44 | Yes         | 11      | 11-A | 1000   | McF_6 | Inf | last   | wholeT_0.01 | J1:DiP, J1:OT, J5:DiP, J5:OT, S1:DiP, S5:DiP, S5:OT                                                                                                                                          |
| 45 | Yes         | 11      | 11-A | 1000   | McF_6 | Inf | last   | wholeT_0.5  | J1:DiP, J1:OT, J5:DiP, J5:OT, S1:DiP, S5:DiP, S5:OT                                                                                                                                          |
| 46 | Yes         | 11      | 11-A | 1000   | McF_6 | Inf | unif   | singleC     | J1:CBN, J1:CBN-A, J1:DiP, J1:DiP-A, J1:OT, J1:OT-A, J5:CBN-A, J5:DiP, J5:DiP-A, J5:OT, J5:OT-A, S1:DiP, S1:DiP-A, S5:CBN-A, S5:DiP, S5:DiP-A, S5:OT, S5:OT-A                                 |
| 47 | Yes         | 11      | 11-A | 1000   | McF_6 | Inf | unif   | wholeT_0.01 | J1:CBN, J1:CBN-A, J1:DiP, J1:DiP-A, J1:OT, J1:OT-A, J5:CBN-A, J5:DiP, J5:DiP-A, J5:OT, J5:OT-A, S1:DiP, S1:DiP-A, S5:CBN, S5:CBN-A, S5:DiP, S5:DiP-A, S5:OT, S5:OT-A                         |
| 48 | Yes         | 11      | 11-A | 1000   | McF_6 | Inf | unif   | wholeT_0.5  | J1:CBN, J1:CBN-A, J1:DiP, J1:DiP-A, J5:CBN-A, J5:DiP, J5:DiP-A, J5:OT, J5:OT-A, S1:DiP, S1:DiP-A, S5:CBN-A, S5:DiP, S5:DiP-A, S5:OT, S5:OT-A                                                 |
| 49 | Yes         | 11      | 11-A | 200    | Bozic | 0   | last   | singleC     | J1:DiP, J1:DiP-A, J1:OT, J1:OT-A, J5:DiP, J5:DiP-A, J5:OT, J5:OT-A, S1:DiP, S1:DiP-A, S5:DiP, S5:DiP-A, S5:OT, S5:OT-A                                                                       |
| 50 | Yes         | 11      | 11-A | 200    | Bozic | 0   | last   | wholeT_0.01 | J1:DiP, J1:DiP-A, J1:OT, J1:OT-A, J5:DiP, J5:DiP-A, J5:OT, J5:OT-A, S5:DiP                                                                                                                   |



Table 8: (continued)

|    | Conjunction | Drivers | Tree | S.Size | Model | sh  | S.Time | S.Type      | Best method(s)                                                                                                                                           |
|----|-------------|---------|------|--------|-------|-----|--------|-------------|----------------------------------------------------------------------------------------------------------------------------------------------------------|
| 51 | Yes         | 11      | 11-A | 200    | Bozic | 0   | last   | wholeT_0.5  | J1:DiP, J1:DiP-A, J1:OT, J1:OT-A, J5:DiP, J5:DiP-A, J5:OT, J5:OT-A, S1:DiP, S1:DiP-A, S5:DiP, S5:DiP-A, S5:OT, S5:OT-A                                   |
| 52 | Yes         | 11      | 11-A | 200    | Bozic | 0   | unif   | singleC     | J1:DiP, J1:DiP-A, J1:OT, J1:OT-A, J5:CBN, J5:CBN-A, J5:DiP, J5:DiP-A, J5:OT, J5:OT-A, S1:DiP, S1:DiP-A, S1:OT, S1:OT-A, S5:DiP, S5:DiP-A, S5:OT, S5:OT-A |
| 53 | Yes         | 11      | 11-A | 200    | Bozic | 0   | unif   | wholeT_0.01 | J5:DiP, J5:DiP-A, J5:OT, J5:OT-A                                                                                                                         |
| 54 | Yes         | 11      | 11-A | 200    | Bozic | 0   | unif   | wholeT_0.5  | J1:DiP, J1:DiP-A, J1:OT, J1:OT-A, J5:CBN, J5:CBN-A, J5:DiP, J5:DiP-A, J5:OT, J5:OT-A, S1:DiP, S1:DiP-A, S1:OT, S1:OT-A, S5:DiP, S5:DiP-A, S5:OT, S5:OT-A |
| 55 | Yes         | 11      | 11-A | 200    | Bozic | Inf | last   | singleC     | J1:DiP, J1:DiP-A, J5:DiP, J5:DiP-A, J5:OT, J5:OT-A, S5:DiP, S5:DiP-A, S5:OT, S5:OT-A                                                                     |
| 56 | Yes         | 11      | 11-A | 200    | Bozic | Inf | last   | wholeT_0.01 | J5:DiP, J5:DiP-A, J5:OT, J5:OT-A                                                                                                                         |
| 57 | Yes         | 11      | 11-A | 200    | Bozic | Inf | last   | wholeT_0.5  | J1:DiP, J1:DiP-A, J5:DiP, J5:DiP-A, J5:OT, J5:OT-A, S5:DiP, S5:DiP-A, S5:OT, S5:OT-A                                                                     |
| 58 | Yes         | 11      | 11-A | 200    | Bozic | Inf | unif   | singleC     | J1:DiP, J1:DiP-A, J1:OT, J1:OT-A, J5:DiP, J5:DiP-A, J5:OT, J5:OT-A, S5:DiP, S5:DiP-A, S5:OT, S5:OT-A                                                     |
| 59 | Yes         | 11      | 11-A | 200    | Bozic | Inf | unif   | wholeT_0.01 | J5:DiP, J5:DiP-A, J5:OT, J5:OT-A                                                                                                                         |
| 60 | Yes         | 11      | 11-A | 200    | Bozic | Inf | unif   | wholeT_0.5  | J1:CBN-A, J1:DiP, J1:DiP-A, J1:OT, J1:OT-A, J5:DiP, J5:DiP-A, J5:OT, J5:OT-A, S5:DiP, S5:DiP-A, S5:OT, S5:OT-A                                           |
| 61 | Yes         | 11      | 11-A | 200    | exp   | 0   | last   | singleC     | J1:DiP, J1:DiP-A, J1:OT, J1:OT-A, J5:CBN, J5:CBN-A, J5:DiP, J5:DiP-A, J5:OT, J5:OT-A, S1:DiP, S1:DiP-A, S1:OT, S1:OT-A, S5:DiP, S5:DiP-A, S5:OT, S5:OT-A |
| 62 | Yes         | 11      | 11-A | 200    | exp   | 0   | last   | wholeT_0.01 | J1:DiP, J1:DiP-A, J1:OT, J1:OT-A, J5:DiP, J5:DiP-A, J5:OT, J5:OT-A, S5:DiP, S5:OT, S5:OT-A                                                               |

Table 8: (continued)

|    | Conjunction | Drivers | Tree | S.Size | Model | sh  | S.Time | S.Type      | Best method(s)                                                                                                                                                             |
|----|-------------|---------|------|--------|-------|-----|--------|-------------|----------------------------------------------------------------------------------------------------------------------------------------------------------------------------|
| 63 | Yes         | 11      | 11-A | 200    | exp   | 0   | last   | wholeT_0.5  | J1:DiP, J1:DiP-A, J1:OT, J1:OT-A, J5:CBN, J5:CBN-A, J5:DiP, J5:DiP-A, J5:OT, J5:OT-A, S1:DiP, S1:DiP-A, S1:OT, S1:OT-A, S5:DiP, S5:DiP-A, S5:OT, S5:OT-A                   |
| 64 | Yes         | 11      | 11-A | 200    | exp   | 0   | unif   | singleC     | J1:CBN, J1:CBN-A, J1:DiP, J1:DiP-A, J1:OT, J1:OT-A, J5:CBN, J5:CBN-A, J5:DiP, J5:DiP-A, J5:OT, J5:OT-A, S1:DiP, S1:DiP-A, S1:OT, S1:OT-A, S5:DiP, S5:DiP-A, S5:OT, S5:OT-A |
| 65 | Yes         | 11      | 11-A | 200    | exp   | 0   | unif   | wholeT_0.01 | J1:DiP, J1:DiP-A, J1:OT, J1:OT-A, J5:CBN, J5:CBN-A, J5:DiP, J5:DiP-A, J5:OT, J5:OT-A, S1:DiP, S1:DiP-A, S1:OT, S1:OT-A, S5:DiP, S5:DiP-A, S5:OT, S5:OT-A                   |
| 66 | Yes         | 11      | 11-A | 200    | exp   | 0   | unif   | wholeT_0.5  | J1:CBN, J1:CBN-A, J1:DiP, J1:DiP-A, J1:OT, J1:OT-A, J5:CBN, J5:CBN-A, J5:DiP, J5:DiP-A, J5:OT, J5:OT-A, S1:DiP, S1:DiP-A, S1:OT, S1:OT-A, S5:DiP, S5:DiP-A, S5:OT, S5:OT-A |
| 67 | Yes         | 11      | 11-A | 200    | exp   | Inf | last   | singleC     | J1:DiP, J1:DiP-A, J1:OT, J1:OT-A, J5:DiP, J5:DiP-A, J5:OT, J5:OT-A, S1:DiP, S1:DiP-A, S5:DiP, S5:DiP-A, S5:OT, S5:OT-A                                                     |
| 68 | Yes         | 11      | 11-A | 200    | exp   | Inf | last   | wholeT_0.01 | J5:DiP, J5:DiP-A, J5:OT, J5:OT-A                                                                                                                                           |
| 69 | Yes         | 11      | 11-A | 200    | exp   | Inf | last   | wholeT_0.5  | J1:DiP, J1:DiP-A, J1:OT, J1:OT-A, J5:DiP, J5:DiP-A, J5:OT, J5:OT-A, S1:DiP, S1:DiP-A, S5:DiP, S5:DiP-A, S5:OT, S5:OT-A                                                     |
| 70 | Yes         | 11      | 11-A | 200    | exp   | Inf | unif   | singleC     | J1:DiP, J1:DiP-A, J1:OT, J1:OT-A, J5:CBN, J5:CBN-A, J5:DiP, J5:DiP-A, J5:OT, J5:OT-A, S1:DiP, S1:DiP-A, S5:DiP, S5:DiP-A, S5:OT, S5:OT-A                                   |
| 71 | Yes         | 11      | 11-A | 200    | exp   | Inf | unif   | wholeT_0.01 | J5:DiP, J5:DiP-A, J5:OT, J5:OT-A, S5:OT, S5:OT-A                                                                                                                           |
| 72 | Yes         | 11      | 11-A | 200    | exp   | Inf | unif   | wholeT_0.5  | J1:DiP, J1:DiP-A, J1:OT, J1:OT-A, J5:CBN, J5:CBN-A, J5:DiP, J5:DiP-A, J5:OT, J5:OT-A, S1:DiP, S1:DiP-A, S5:DiP, S5:DiP-A, S5:OT, S5:OT-A                                   |

Table 8: (continued)

|    | Conjunction | Drivers | Tree | S.Size | Model | sh  | S.Time | S.Type      | Best method(s)                                                                                                                                     |
|----|-------------|---------|------|--------|-------|-----|--------|-------------|----------------------------------------------------------------------------------------------------------------------------------------------------|
| 73 | Yes         | 11      | 11-A | 200    | McF_4 | 0   | last   | singleC     | J1:DiP, J1:DiP-A, J1:OT, J1:OT-A, J5:DiP, J5:DiP-A, J5:OT, J5:OT-A, S5:DiP, S5:DiP-A, S5:OT, S5:OT-A                                               |
| 74 | Yes         | 11      | 11-A | 200    | McF_4 | 0   | last   | wholeT_0.01 | J1:DiP, J1:DiP-A, J1:OT, J1:OT-A, J5:DiP, J5:DiP-A, J5:OT, J5:OT-A, S1:DiP-A, S5:DiP, S5:DiP-A, S5:OT, S5:OT-A                                     |
| 75 | Yes         | 11      | 11-A | 200    | McF_4 | 0   | last   | wholeT_0.5  | J1:DiP, J1:DiP-A, J1:OT, J1:OT-A, J5:DiP, J5:DiP-A, J5:OT, J5:OT-A, S1:DiP-A, S5:DiP, S5:DiP-A, S5:OT, S5:OT-A                                     |
| 76 | Yes         | 11      | 11-A | 200    | McF_4 | 0   | unif   | singleC     | J1:CBN-A, J1:DiP, J1:DiP-A, J1:OT, J1:OT-A, J5:DiP, J5:DiP-A, J5:OT, J5:OT-A, S1:DiP, S5:CBN-A, S5:DiP, S5:DiP-A, S5:OT, S5:OT-A                   |
| 77 | Yes         | 11      | 11-A | 200    | McF_4 | 0   | unif   | wholeT_0.01 | J1:CBN-A, J1:DiP, J1:DiP-A, J1:OT, J1:OT-A, J5:DiP, J5:DiP-A, J5:OT, J5:OT-A, S1:DiP, S1:DiP-A, S5:CBN-A, S5:DiP, S5:DiP-A, S5:OT, S5:OT-A         |
| 78 | Yes         | 11      | 11-A | 200    | McF_4 | 0   | unif   | wholeT_0.5  | J1:CBN-A, J1:DiP, J1:DiP-A, J1:OT, J1:OT-A, J5:DiP, J5:DiP-A, J5:OT, J5:OT-A, S1:DiP, S1:DiP-A, S5:CBN, S5:CBN-A, S5:DiP, S5:DiP-A, S5:OT, S5:OT-A |
| 79 | Yes         | 11      | 11-A | 200    | McF_4 | Inf | last   | singleC     | J1:DiP, J1:DiP-A, J1:OT, J1:OT-A, J5:DiP, J5:DiP-A, J5:OT, J5:OT-A, S1:DiP, S1:DiP-A, S5:DiP, S5:DiP-A, S5:OT, S5:OT-A                             |
| 80 | Yes         | 11      | 11-A | 200    | McF_4 | Inf | last   | wholeT_0.01 | J1:DiP, J1:DiP-A, J1:OT, J1:OT-A, J5:DiP, J5:DiP-A, J5:OT, J5:OT-A, S5:OT                                                                          |
| 81 | Yes         | 11      | 11-A | 200    | McF_4 | Inf | last   | wholeT_0.5  | J1:DiP, J1:DiP-A, J1:OT, J1:OT-A, J5:DiP, J5:DiP-A, J5:OT, J5:OT-A, S1:DiP, S1:DiP-A, S5:DiP, S5:DiP-A, S5:OT, S5:OT-A                             |
| 82 | Yes         | 11      | 11-A | 200    | McF_4 | Inf | unif   | singleC     | J1:CBN-A, J1:DiP, J1:DiP-A, J1:OT, J1:OT-A, J5:CBN-A, J5:DiP, J5:DiP-A, J5:OT, J5:OT-A, S5:CBN-A, S5:DiP, S5:DiP-A, S5:OT, S5:OT-A                 |

Table 8: (continued)

|    | Conjunction | Drivers | Tree | S.Size | Model | sh  | S.Time | S.Type      | Best method(s)                                                                                                                                             |
|----|-------------|---------|------|--------|-------|-----|--------|-------------|------------------------------------------------------------------------------------------------------------------------------------------------------------|
| 83 | Yes         | 11      | 11-A | 200    | McF_4 | Inf | unif   | wholeT_0.01 | J1:CBN-A, J1:DiP, J1:DiP-A, J1:OT, J1:OT-A, J5:DiP, J5:DiP-A, J5:OT, J5:OT-A, S1:DiP, S5:CBN-A, S5:DiP, S5:DiP-A, S5:OT, S5:OT-A                           |
| 84 | Yes         | 11      | 11-A | 200    | McF_4 | Inf | unif   | wholeT_0.5  | J1:CBN-A, J1:DiP, J1:DiP-A, J1:OT, J1:OT-A, J5:DiP, J5:DiP-A, J5:OT, J5:OT-A, S1:DiP, S5:DiP, S5:DiP-A, S5:OT, S5:OT-A                                     |
| 85 | Yes         | 11      | 11-A | 200    | McF_6 | 0   | last   | singleC     | J1:DiP, J1:OT, J5:DiP, J5:OT, S1:DiP, S5:DiP, S5:OT                                                                                                        |
| 86 | Yes         | 11      | 11-A | 200    | McF_6 | 0   | last   | wholeT_0.01 | J1:DiP, J1:OT, J5:DiP, J5:OT, S1:DiP, S5:DiP, S5:OT                                                                                                        |
| 87 | Yes         | 11      | 11-A | 200    | McF_6 | 0   | last   | wholeT_0.5  | J1:DiP, J1:OT, J5:DiP, J5:OT, S1:DiP, S5:DiP, S5:OT                                                                                                        |
| 88 | Yes         | 11      | 11-A | 200    | McF_6 | 0   | unif   | singleC     | J1:CBN, J1:CBN-A, J1:OT, J1:OT-A, J5:CBN, J5:CBN-A, J5:DiP, J5:OT, J5:OT-A, S5:CBN, S5:CBN-A, S5:OT, S5:OT-A                                               |
| 89 | Yes         | 11      | 11-A | 200    | McF_6 | 0   | unif   | wholeT_0.01 | J1:CBN, J1:CBN-A, J1:DiP, J1:DiP-A, J1:OT, J1:OT-A, J5:CBN, J5:CBN-A, J5:DiP, J5:DiP-A, J5:OT, J5:OT-A, S5:CBN, S5:CBN-A, S5:DiP, S5:DiP-A, S5:OT, S5:OT-A |
| 90 | Yes         | 11      | 11-A | 200    | McF_6 | 0   | unif   | wholeT_0.5  | J1:CBN, J1:CBN-A, J1:DiP, J5:CBN, J5:CBN-A, J5:DiP, J5:DiP-A, J5:OT, J5:OT-A, S5:CBN, S5:CBN-A, S5:DiP, S5:OT, S5:OT-A                                     |
| 91 | Yes         | 11      | 11-A | 200    | McF_6 | Inf | last   | singleC     | J1:DiP, J1:OT, J5:DiP, J5:OT, S1:DiP, S5:DiP, S5:OT                                                                                                        |
| 92 | Yes         | 11      | 11-A | 200    | McF_6 | Inf | last   | wholeT_0.01 | J1:DiP, J1:OT, J5:DiP, J5:OT, S1:DiP, S5:DiP, S5:OT                                                                                                        |
| 93 | Yes         | 11      | 11-A | 200    | McF_6 | Inf | last   | wholeT_0.5  | J1:DiP, J1:OT, J5:DiP, J5:OT, S1:DiP, S5:DiP, S5:OT                                                                                                        |
| 94 | Yes         | 11      | 11-A | 200    | McF_6 | Inf | unif   | singleC     | J1:CBN-A, J1:OT, J1:OT-A, J5:CBN, J5:CBN-A, J5:OT, J5:OT-A, S5:CBN, S5:CBN-A                                                                               |
| 95 | Yes         | 11      | 11-A | 200    | McF_6 | Inf | unif   | wholeT_0.01 | J1:CBN-A, J1:OT, J1:OT-A, J5:CBN-A, J5:DiP, J5:DiP-A, J5:OT, J5:OT-A, S5:CBN, S5:CBN-A, S5:OT, S5:OT-A                                                     |

Table 8: (continued)

|     | Conjunction | Drivers | Tree | S.Size | Model | sh  | S.Time | S.Type      | Best method(s)                                                                                                                           |
|-----|-------------|---------|------|--------|-------|-----|--------|-------------|------------------------------------------------------------------------------------------------------------------------------------------|
| 96  | Yes         | 11      | 11-A | 200    | McF_6 | Inf | unif   | wholeT_0.5  | J1:CBN-A, J1:OT, J1:OT-A, J5:CBN, J5:CBN-A, J5:DiP, J5:DiP-A, J5:OT, J5:OT-A, S5:CBN, S5:CBN-A, S5:OT, S5:OT-A                           |
| 97  | Yes         | 11      | 11-A | 100    | Bozic | 0   | last   | singleC     | J1:DiP, J1:DiP-A, J5:DiP, J5:DiP-A, J5:OT, J5:OT-A, S1:DiP, S1:DiP-A, S5:DiP, S5:DiP-A, S5:OT, S5:OT-A                                   |
| 98  | Yes         | 11      | 11-A | 100    | Bozic | 0   | last   | wholeT_0.01 | J1:DiP, J1:DiP-A, J5:DiP, J5:DiP-A, J5:OT, J5:OT-A                                                                                       |
| 99  | Yes         | 11      | 11-A | 100    | Bozic | 0   | last   | wholeT_0.5  | J1:DiP, J1:DiP-A, J5:DiP, J5:DiP-A, J5:OT, J5:OT-A, S1:DiP, S1:DiP-A, S5:DiP, S5:DiP-A, S5:OT, S5:OT-A                                   |
| 100 | Yes         | 11      | 11-A | 100    | Bozic | 0   | unif   | singleC     | J1:DiP, J1:DiP-A, J1:OT, J1:OT-A, J5:CBN, J5:CBN-A, J5:DiP, J5:DiP-A, J5:OT, J5:OT-A, S1:DiP, S1:DiP-A, S5:DiP, S5:DiP-A, S5:OT, S5:OT-A |
| 101 | Yes         | 11      | 11-A | 100    | Bozic | 0   | unif   | wholeT_0.01 | J5:DiP, J5:DiP-A, J5:OT, J5:OT-A, S5:DiP, S5:DiP-A, S5:OT, S5:OT-A                                                                       |
| 102 | Yes         | 11      | 11-A | 100    | Bozic | 0   | unif   | wholeT_0.5  | J1:DiP, J1:DiP-A, J5:CBN, J5:CBN-A, J5:DiP, J5:DiP-A, J5:OT, J5:OT-A, S1:DiP, S1:DiP-A, S5:DiP, S5:DiP-A, S5:OT, S5:OT-A                 |
| 103 | Yes         | 11      | 11-A | 100    | Bozic | Inf | last   | singleC     | J1:DiP, J1:DiP-A, J5:DiP, J5:DiP-A, J5:OT, J5:OT-A, S1:DiP, S5:DiP, S5:DiP-A                                                             |
| 104 | Yes         | 11      | 11-A | 100    | Bozic | Inf | last   | wholeT_0.01 | J5:DiP, J5:DiP-A, J5:OT, J5:OT-A                                                                                                         |
| 105 | Yes         | 11      | 11-A | 100    | Bozic | Inf | last   | wholeT_0.5  | J1:DiP, J1:DiP-A, J5:DiP, J5:DiP-A, J5:OT, J5:OT-A, S1:DiP, S1:DiP-A, S5:DiP, S5:DiP-A                                                   |
| 106 | Yes         | 11      | 11-A | 100    | Bozic | Inf | unif   | singleC     | J1:DiP, J1:DiP-A, J5:DiP, J5:DiP-A, J5:OT, J5:OT-A, S5:DiP, S5:DiP-A, S5:OT, S5:OT-A                                                     |
| 107 | Yes         | 11      | 11-A | 100    | Bozic | Inf | unif   | wholeT_0.01 | J5:DiP, J5:DiP-A, J5:OT, J5:OT-A                                                                                                         |
| 108 | Yes         | 11      | 11-A | 100    | Bozic | Inf | unif   | wholeT_0.5  | J1:DiP, J1:DiP-A, J5:CBN, J5:CBN-A, J5:DiP, J5:DiP-A, J5:OT, J5:OT-A, S1:DiP, S1:DiP-A, S5:DiP, S5:DiP-A, S5:OT, S5:OT-A                 |

Table 8: (continued)

|     | Conjunction | Drivers | Tree | S.Size | Model | sh  | S.Time | S.Type      | Best method(s)                                                                                                                                                             |
|-----|-------------|---------|------|--------|-------|-----|--------|-------------|----------------------------------------------------------------------------------------------------------------------------------------------------------------------------|
| 109 | Yes         | 11      | 11-A | 100    | exp   | 0   | last   | singleC     | J1:DiP, J1:DiP-A, J1:OT, J1:OT-A, J5:CBN, J5:CBN-A, J5:DiP, J5:DiP-A, J5:OT, J5:OT-A, S1:DiP, S1:DiP-A, S5:DiP, S5:DiP-A, S5:OT, S5:OT-A                                   |
| 110 | Yes         | 11      | 11-A | 100    | exp   | 0   | last   | wholeT_0.01 | J1:DiP, J1:DiP-A, J1:OT, J1:OT-A, J5:DiP, J5:DiP-A, J5:OT, J5:OT-A, S1:DiP, S1:DiP-A, S5:DiP, S5:DiP-A, S5:OT, S5:OT-A                                                     |
| 111 | Yes         | 11      | 11-A | 100    | exp   | 0   | last   | wholeT_0.5  | J1:DiP, J1:DiP-A, J1:OT, J1:OT-A, J5:CBN, J5:CBN-A, J5:DiP, J5:DiP-A, J5:OT, J5:OT-A, S1:DiP, S1:DiP-A, S1:OT, S1:OT-A, S5:DiP, S5:DiP-A, S5:OT, S5:OT-A                   |
| 112 | Yes         | 11      | 11-A | 100    | exp   | 0   | unif   | singleC     | J1:CBN, J1:CBN-A, J1:DiP, J1:DiP-A, J1:OT, J1:OT-A, J5:CBN, J5:CBN-A, J5:DiP, J5:DiP-A, J5:OT, J5:OT-A, S1:DiP, S1:DiP-A, S1:OT, S1:OT-A, S5:DiP, S5:DiP-A, S5:OT, S5:OT-A |
| 113 | Yes         | 11      | 11-A | 100    | exp   | 0   | unif   | wholeT_0.01 | J1:DiP, J1:DiP-A, J1:OT, J1:OT-A, J5:CBN, J5:CBN-A, J5:DiP, J5:DiP-A, J5:OT, J5:OT-A, S1:DiP, S1:DiP-A, S5:DiP, S5:DiP-A, S5:OT, S5:OT-A                                   |
| 114 | Yes         | 11      | 11-A | 100    | exp   | 0   | unif   | wholeT_0.5  | J1:DiP, J1:DiP-A, J1:OT, J1:OT-A, J5:CBN, J5:CBN-A, J5:DiP, J5:DiP-A, J5:OT, J5:OT-A, S1:DiP, S1:DiP-A, S5:DiP, S5:DiP-A, S5:OT, S5:OT-A                                   |
| 115 | Yes         | 11      | 11-A | 100    | exp   | Inf | last   | singleC     | J1:DiP, J1:DiP-A, J5:DiP, J5:DiP-A, J5:OT, J5:OT-A, S1:DiP, S1:DiP-A, S5:DiP, S5:DiP-A, S5:OT, S5:OT-A                                                                     |
| 116 | Yes         | 11      | 11-A | 100    | exp   | Inf | last   | wholeT_0.01 | J5:DiP, J5:DiP-A, J5:OT, J5:OT-A                                                                                                                                           |
| 117 | Yes         | 11      | 11-A | 100    | exp   | Inf | last   | wholeT_0.5  | J1:DiP, J1:DiP-A, J5:DiP, J5:DiP-A, J5:OT, J5:OT-A, S1:DiP, S1:DiP-A, S5:DiP, S5:DiP-A, S5:OT, S5:OT-A                                                                     |
| 118 | Yes         | 11      | 11-A | 100    | exp   | Inf | unif   | singleC     | J1:DiP, J1:DiP-A, J5:CBN, J5:CBN-A, J5:DiP, J5:DiP-A, J5:OT, J5:OT-A, S1:DiP, S1:DiP-A, S5:DiP, S5:DiP-A, S5:OT, S5:OT-A                                                   |
| 119 | Yes         | 11      | 11-A | 100    | exp   | Inf | unif   | wholeT_0.01 | J5:DiP, J5:DiP-A, J5:OT, J5:OT-A                                                                                                                                           |

Table 8: (continued)

|     | Conjunction | Drivers | Tree | S.Size | Model | sh  | S.Time | S.Type      | Best method(s)                                                                                                                                       |
|-----|-------------|---------|------|--------|-------|-----|--------|-------------|------------------------------------------------------------------------------------------------------------------------------------------------------|
| 120 | Yes         | 11      | 11-A | 100    | exp   | Inf | unif   | wholeT_0.5  | J1:DiP, J1:DiP-A, J5:CBN, J5:CBN-A, J5:DiP, J5:DiP-A, J5:OT, J5:OT-A, S1:DiP, S1:DiP-A, S5:DiP, S5:DiP-A, S5:OT, S5:OT-A                             |
| 121 | Yes         | 11      | 11-A | 100    | McF_4 | 0   | last   | singleC     | J1:DiP, J1:DiP-A, J5:DiP, J5:DiP-A, J5:OT, J5:OT-A, S1:DiP, S1:DiP-A, S5:DiP, S5:DiP-A, S5:OT, S5:OT-A                                               |
| 122 | Yes         | 11      | 11-A | 100    | McF_4 | 0   | last   | wholeT_0.01 | J1:DiP, J1:DiP-A, J5:DiP, J5:DiP-A, J5:OT, J5:OT-A, S1:DiP, S1:DiP-A, S5:DiP, S5:DiP-A, S5:OT                                                        |
| 123 | Yes         | 11      | 11-A | 100    | McF_4 | 0   | last   | wholeT_0.5  | J1:DiP, J1:DiP-A, J5:DiP, J5:DiP-A, J5:OT, J5:OT-A, S1:DiP, S1:DiP-A, S5:DiP, S5:DiP-A, S5:OT, S5:OT-A                                               |
| 124 | Yes         | 11      | 11-A | 100    | McF_4 | 0   | unif   | singleC     | J1:CBN, J1:CBN-A, J1:DiP, J1:DiP-A, J1:OT, J1:OT-A, J5:DiP, J5:DiP-A, J5:OT, J5:OT-A, S1:DiP, S1:DiP-A, S5:DiP, S5:DiP-A, S5:OT, S5:OT-A             |
| 125 | Yes         | 11      | 11-A | 100    | McF_4 | 0   | unif   | wholeT_0.01 | J1:DiP, J1:DiP-A, J5:DiP, J5:DiP-A, J5:OT, J5:OT-A, S5:DiP, S5:DiP-A                                                                                 |
| 126 | Yes         | 11      | 11-A | 100    | McF_4 | 0   | unif   | wholeT_0.5  | J1:CBN-A, J1:DiP, J1:DiP-A, J1:OT, J1:OT-A, J5:CBN-A, J5:DiP, J5:DiP-A, J5:OT, J5:OT-A, S1:DiP, S1:DiP-A, S5:CBN-A, S5:DiP, S5:DiP-A, S5:OT, S5:OT-A |
| 127 | Yes         | 11      | 11-A | 100    | McF_4 | Inf | last   | singleC     | J1:DiP, J1:DiP-A, J5:DiP, J5:DiP-A, J5:OT, J5:OT-A, S1:DiP, S1:DiP-A, S5:DiP, S5:DiP-A, S5:OT, S5:OT-A                                               |
| 128 | Yes         | 11      | 11-A | 100    | McF_4 | Inf | last   | wholeT_0.01 | J1:DiP, J1:DiP-A, J5:DiP, J5:DiP-A, J5:OT, J5:OT-A, S1:DiP, S5:DiP, S5:DiP-A                                                                         |
| 129 | Yes         | 11      | 11-A | 100    | McF_4 | Inf | last   | wholeT_0.5  | J1:DiP, J1:DiP-A, J5:DiP, J5:DiP-A, J5:OT, J5:OT-A, S1:DiP, S1:DiP-A, S5:DiP, S5:DiP-A, S5:OT, S5:OT-A                                               |
| 130 | Yes         | 11      | 11-A | 100    | McF_4 | Inf | unif   | singleC     | J1:DiP, J1:DiP-A, J1:OT, J1:OT-A, J5:DiP, J5:DiP-A, J5:OT, J5:OT-A, S1:DiP, S1:DiP-A, S5:CBN-A, S5:DiP, S5:DiP-A, S5:OT, S5:OT-A                     |
| 131 | Yes         | 11      | 11-A | 100    | McF_4 | Inf | unif   | wholeT_0.01 | J1:DiP, J1:DiP-A, J5:DiP, J5:DiP-A, J5:OT, J5:OT-A, S5:DiP, S5:DiP-A                                                                                 |

Table 8: (continued)

|     | Conjunction | Drivers | Tree | S.Size | Model | sh  | S.Time | S.Type      | Best method(s)                                                                                                                         |
|-----|-------------|---------|------|--------|-------|-----|--------|-------------|----------------------------------------------------------------------------------------------------------------------------------------|
| 132 | Yes         | 11      | 11-A | 100    | McF_4 | Inf | unif   | wholeT_0.5  | J1:CBN-A, J1:DiP, J1:DiP-A, J5:CBN-A, J5:DiP, J5:DiP-A, J5:OT, J5:OT-A, S1:DiP, S5:CBN-A, S5:DiP                                       |
| 133 | Yes         | 11      | 11-A | 100    | McF_6 | 0   | last   | singleC     | J1:DiP, J1:OT, J5:DiP, J5:OT, S1:DiP, S5:DiP                                                                                           |
| 134 | Yes         | 11      | 11-A | 100    | McF_6 | 0   | last   | wholeT_0.01 | J1:DiP, J5:DiP, J5:OT, S1:DiP, S5:DiP, S5:OT                                                                                           |
| 135 | Yes         | 11      | 11-A | 100    | McF_6 | 0   | last   | wholeT_0.5  | J1:DiP, J5:DiP, J5:OT, S1:DiP, S5:DiP, S5:OT                                                                                           |
| 136 | Yes         | 11      | 11-A | 100    | McF_6 | 0   | unif   | singleC     | J1:CBN-A, J5:CBN, J5:CBN-A, J5:DiP, J5:DiP-A, J5:OT, J5:OT-A                                                                           |
| 137 | Yes         | 11      | 11-A | 100    | McF_6 | 0   | unif   | wholeT_0.01 | J1:DiP, J1:DiP-A, J5:CBN, J5:CBN-A, J5:DiP, J5:DiP-A, J5:OT, J5:OT-A, S5:DiP, S5:OT                                                    |
| 138 | Yes         | 11      | 11-A | 100    | McF_6 | 0   | unif   | wholeT_0.5  | J1:CBN, J1:CBN-A, J5:CBN-A, J5:DiP, J5:DiP-A, S5:CBN, S5:CBN-A                                                                         |
| 139 | Yes         | 11      | 11-A | 100    | McF_6 | Inf | last   | singleC     | J1:DiP, J1:OT, J5:DiP, J5:OT, S1:DiP, S5:DiP                                                                                           |
| 140 | Yes         | 11      | 11-A | 100    | McF_6 | Inf | last   | wholeT_0.01 | J1:DiP, J5:DiP, J5:OT, S1:DiP, S5:DiP                                                                                                  |
| 141 | Yes         | 11      | 11-A | 100    | McF_6 | Inf | last   | wholeT_0.5  | J1:DiP, J5:DiP, J5:OT, S1:DiP, S5:DiP                                                                                                  |
| 142 | Yes         | 11      | 11-A | 100    | McF_6 | Inf | unif   | singleC     | J1:CBN, J1:CBN-A, J5:CBN-A, J5:DiP, J5:DiP-A, J5:OT, J5:OT-A                                                                           |
| 143 | Yes         | 11      | 11-A | 100    | McF_6 | Inf | unif   | wholeT_0.01 | J1:DiP, J5:CBN-A, J5:DiP, J5:DiP-A, J5:OT, J5:OT-A, S5:CBN, S5:CBN-A                                                                   |
| 144 | Yes         | 11      | 11-A | 100    | McF_6 | Inf | unif   | wholeT_0.5  | J1:CBN-A, J1:DiP, J1:DiP-A, J1:OT, J1:OT-A, J5:CBN-A, J5:DiP, J5:DiP-A, J5:OT, J5:OT-A, S5:CBN, S5:CBN-A, S5:OT, S5:OT-A               |
| 145 | Yes         | 9       | 9-A  | 1000   | Bozic | 0   | last   | singleC     | J1:DiP, J1:DiP-A, J1:OT, J1:OT-A, J5:DiP, J5:DiP-A, J5:OT, J5:OT-A, S1:OT, S1:OT-A, S5:DiP, S5:DiP-A, S5:OT, S5:OT-A                   |
| 146 | Yes         | 9       | 9-A  | 1000   | Bozic | 0   | last   | wholeT_0.01 | J1:DiP, J1:DiP-A, J1:OT, J1:OT-A, J5:DiP, J5:DiP-A, J5:OT, J5:OT-A, S1:DiP, S1:DiP-A, S1:OT, S1:OT-A, S5:DiP, S5:DiP-A, S5:OT, S5:OT-A |
| 147 | Yes         | 9       | 9-A  | 1000   | Bozic | 0   | last   | wholeT_0.5  | J1:DiP, J1:DiP-A, J1:OT, J1:OT-A, J5:CBN, J5:CBN-A, J5:DiP, J5:DiP-A, J5:OT, J5:OT-A, S1:OT, S1:OT-A, S5:DiP, S5:DiP-A, S5:OT, S5:OT-A |



Table 8: (continued)

|     | Conjunction | Drivers | Tree | S.Size | Model | sh  | S.Time | S.Type      | Best method(s)                                                                                                                                                             |
|-----|-------------|---------|------|--------|-------|-----|--------|-------------|----------------------------------------------------------------------------------------------------------------------------------------------------------------------------|
| 148 | Yes         | 9       | 9-A  | 1000   | Bozic | 0   | unif   | singleC     | J1:DiP, J1:DiP-A, J1:OT, J1:OT-A, J5:CBN, J5:CBN-A, J5:DiP, J5:DiP-A, J5:OT, J5:OT-A, S1:DiP, S1:DiP-A, S1:OT, S1:OT-A, S5:DiP, S5:DiP-A, S5:OT, S5:OT-A                   |
| 149 | Yes         | 9       | 9-A  | 1000   | Bozic | 0   | unif   | wholeT_0.01 | J1:DiP, J1:DiP-A, J1:OT, J1:OT-A, J5:DiP, J5:DiP-A, J5:OT, J5:OT-A, S1:DiP, S1:DiP-A, S1:OT, S1:OT-A, S5:DiP, S5:DiP-A, S5:OT, S5:OT-A                                     |
| 150 | Yes         | 9       | 9-A  | 1000   | Bozic | 0   | unif   | wholeT_0.5  | J1:CBN, J1:CBN-A, J1:DiP, J1:DiP-A, J1:OT, J1:OT-A, J5:CBN, J5:CBN-A, J5:DiP, J5:DiP-A, J5:OT, J5:OT-A, S1:DiP, S1:DiP-A, S1:OT, S1:OT-A, S5:DiP, S5:DiP-A, S5:OT, S5:OT-A |
| 151 | Yes         | 9       | 9-A  | 1000   | Bozic | Inf | last   | singleC     | J1:DiP, J1:DiP-A, J1:OT, J1:OT-A, J5:DiP, J5:DiP-A, J5:OT, J5:OT-A, S5:OT, S5:OT-A                                                                                         |
| 152 | Yes         | 9       | 9-A  | 1000   | Bozic | Inf | last   | wholeT_0.01 | J5:DiP, J5:DiP-A, J5:OT, J5:OT-A                                                                                                                                           |
| 153 | Yes         | 9       | 9-A  | 1000   | Bozic | Inf | last   | wholeT_0.5  | J1:DiP, J1:DiP-A, J1:OT, J1:OT-A, J5:DiP, J5:DiP-A, J5:OT, J5:OT-A, S5:DiP, S5:DiP-A, S5:OT, S5:OT-A                                                                       |
| 154 | Yes         | 9       | 9-A  | 1000   | Bozic | Inf | unif   | singleC     | J1:DiP, J1:DiP-A, J1:OT, J1:OT-A, J5:CBN, J5:CBN-A, J5:DiP, J5:DiP-A, J5:OT, J5:OT-A, S1:DiP, S1:DiP-A, S1:OT, S1:OT-A, S5:DiP, S5:DiP-A, S5:OT, S5:OT-A                   |
| 155 | Yes         | 9       | 9-A  | 1000   | Bozic | Inf | unif   | wholeT_0.01 | J5:DiP, J5:DiP-A, J5:OT, J5:OT-A, S5:DiP, S5:DiP-A, S5:OT, S5:OT-A                                                                                                         |
| 156 | Yes         | 9       | 9-A  | 1000   | Bozic | Inf | unif   | wholeT_0.5  | J1:DiP, J1:DiP-A, J1:OT, J1:OT-A, J5:CBN, J5:CBN-A, J5:DiP, J5:DiP-A, J5:OT, J5:OT-A, S1:CBN, S1:DiP, S1:DiP-A, S1:OT, S1:OT-A, S5:DiP, S5:DiP-A, S5:OT, S5:OT-A           |
| 157 | Yes         | 9       | 9-A  | 1000   | exp   | 0   | last   | singleC     | J1:DiP, J1:DiP-A, J1:OT, J1:OT-A, J5:CBN, J5:CBN-A, J5:DiP, J5:DiP-A, J5:OT, J5:OT-A, S1:DiP, S1:DiP-A, S1:OT, S1:OT-A, S5:DiP, S5:DiP-A, S5:OT, S5:OT-A                   |

Table 8: (continued)

|     | Conjunction | Drivers | Tree | S.Size | Model | sh  | S.Time | S.Type      | Best method(s)                                                                                                                                                             |
|-----|-------------|---------|------|--------|-------|-----|--------|-------------|----------------------------------------------------------------------------------------------------------------------------------------------------------------------------|
| 158 | Yes         | 9       | 9-A  | 1000   | exp   | 0   | last   | wholeT_0.01 | J1:DiP, J1:DiP-A, J1:OT, J1:OT-A, J5:DiP, J5:DiP-A, J5:OT, J5:OT-A, S1:DiP-A, S1:OT, S1:OT-A, S5:DiP, S5:DiP-A, S5:OT, S5:OT-A                                             |
| 159 | Yes         | 9       | 9-A  | 1000   | exp   | 0   | last   | wholeT_0.5  | J1:DiP, J1:DiP-A, J1:OT, J1:OT-A, J5:CBN, J5:CBN-A, J5:DiP, J5:DiP-A, J5:OT, J5:OT-A, S1:DiP, S1:DiP-A, S1:OT, S1:OT-A, S5:DiP, S5:DiP-A, S5:OT, S5:OT-A                   |
| 160 | Yes         | 9       | 9-A  | 1000   | exp   | 0   | unif   | singleC     | J1:CBN, J1:CBN-A, J1:DiP, J1:DiP-A, J1:OT, J1:OT-A, J5:CBN, J5:CBN-A, J5:DiP, J5:DiP-A, J5:OT, J5:OT-A, S1:DiP, S1:DiP-A, S1:OT, S1:OT-A, S5:DiP, S5:DiP-A, S5:OT, S5:OT-A |
| 161 | Yes         | 9       | 9-A  | 1000   | exp   | 0   | unif   | wholeT_0.01 | J1:DiP, J1:DiP-A, J1:OT, J1:OT-A, J5:CBN, J5:CBN-A, J5:DiP, J5:DiP-A, J5:OT, J5:OT-A, S1:DiP, S1:DiP-A, S1:OT, S1:OT-A, S5:DiP, S5:DiP-A, S5:OT, S5:OT-A                   |
| 162 | Yes         | 9       | 9-A  | 1000   | exp   | 0   | unif   | wholeT_0.5  | J1:CBN, J1:CBN-A, J1:DiP, J1:DiP-A, J1:OT, J1:OT-A, J5:CBN, J5:CBN-A, J5:DiP, J5:DiP-A, J5:OT, J5:OT-A, S1:DiP, S1:DiP-A, S1:OT, S1:OT-A, S5:DiP, S5:DiP-A, S5:OT, S5:OT-A |
| 163 | Yes         | 9       | 9-A  | 1000   | exp   | Inf | last   | singleC     | J1:DiP, J1:DiP-A, J1:OT, J1:OT-A, J5:DiP, J5:DiP-A, J5:OT, J5:OT-A, S5:DiP, S5:DiP-A, S5:OT, S5:OT-A                                                                       |
| 164 | Yes         | 9       | 9-A  | 1000   | exp   | Inf | last   | wholeT_0.01 | J5:DiP, J5:DiP-A, J5:OT, J5:OT-A                                                                                                                                           |
| 165 | Yes         | 9       | 9-A  | 1000   | exp   | Inf | last   | wholeT_0.5  | J1:DiP, J1:DiP-A, J1:OT, J1:OT-A, J5:DiP, J5:DiP-A, J5:OT, J5:OT-A, S5:DiP, S5:DiP-A, S5:OT, S5:OT-A                                                                       |
| 166 | Yes         | 9       | 9-A  | 1000   | exp   | Inf | unif   | singleC     | J1:DiP, J1:DiP-A, J1:OT, J1:OT-A, J5:CBN, J5:CBN-A, J5:DiP, J5:DiP-A, J5:OT, J5:OT-A, S1:DiP, S1:DiP-A, S1:OT, S1:OT-A, S5:DiP, S5:DiP-A, S5:OT, S5:OT-A                   |
| 167 | Yes         | 9       | 9-A  | 1000   | exp   | Inf | unif   | wholeT_0.01 | J1:DiP, J1:DiP-A, J1:OT, J1:OT-A, J5:DiP, J5:DiP-A, J5:OT, J5:OT-A, S5:DiP, S5:DiP-A, S5:OT, S5:OT-A                                                                       |

Table 8: (continued)

|     | Conjunction | Drivers | Tree | S.Size | Model | sh  | S.Time | S.Type      | Best method(s)                                                                                                                                           |
|-----|-------------|---------|------|--------|-------|-----|--------|-------------|----------------------------------------------------------------------------------------------------------------------------------------------------------|
| 168 | Yes         | 9       | 9-A  | 1000   | exp   | Inf | unif   | wholeT_0.5  | J1:DiP, J1:DiP-A, J1:OT, J1:OT-A, J5:CBN, J5:CBN-A, J5:DiP, J5:DiP-A, J5:OT, J5:OT-A, S1:DiP, S1:DiP-A, S1:OT, S1:OT-A, S5:DiP, S5:DiP-A, S5:OT, S5:OT-A |
| 169 | Yes         | 9       | 9-A  | 1000   | McF_4 | 0   | last   | singleC     | J1:DiP, J1:DiP-A, J1:OT, J1:OT-A, J5:DiP, J5:DiP-A, J5:OT, J5:OT-A, S1:DiP, S1:DiP-A, S1:OT, S1:OT-A, S5:DiP, S5:DiP-A, S5:OT, S5:OT-A                   |
| 170 | Yes         | 9       | 9-A  | 1000   | McF_4 | 0   | last   | wholeT_0.01 | J1:DiP, J1:DiP-A, J1:OT, J1:OT-A, J5:CBN, J5:DiP, J5:DiP-A, J5:OT, J5:OT-A, S1:DiP-A, S5:DiP, S5:DiP-A, S5:OT, S5:OT-A                                   |
| 171 | Yes         | 9       | 9-A  | 1000   | McF_4 | 0   | last   | wholeT_0.5  | J1:DiP, J1:DiP-A, J1:OT, J1:OT-A, J5:CBN, J5:DiP, J5:DiP-A, J5:OT, J5:OT-A, S1:DiP, S1:DiP-A, S1:OT, S1:OT-A, S5:DiP, S5:DiP-A, S5:OT, S5:OT-A           |
| 172 | Yes         | 9       | 9-A  | 1000   | McF_4 | 0   | unif   | singleC     | J1:CBN-A, J1:DiP, J1:DiP-A, J1:OT, J1:OT-A, J5:DiP, J5:DiP-A, J5:OT, J5:OT-A, S1:DiP, S1:DiP-A, S1:OT, S1:OT-A, S5:DiP, S5:DiP-A, S5:OT, S5:OT-A         |
| 173 | Yes         | 9       | 9-A  | 1000   | McF_4 | 0   | unif   | wholeT_0.01 | J1:CBN-A, J1:DiP, J1:DiP-A, J1:OT, J1:OT-A, J5:DiP, J5:DiP-A, J5:OT, J5:OT-A, S1:DiP-A, S5:CBN-A, S5:DiP, S5:DiP-A, S5:OT, S5:OT-A                       |
| 174 | Yes         | 9       | 9-A  | 1000   | McF_4 | 0   | unif   | wholeT_0.5  | J1:DiP, J1:DiP-A, J1:OT, J1:OT-A, J5:DiP, J5:DiP-A, J5:OT, J5:OT-A, S1:DiP, S1:DiP-A, S1:OT, S1:OT-A, S5:DiP, S5:DiP-A, S5:OT, S5:OT-A                   |
| 175 | Yes         | 9       | 9-A  | 1000   | McF_4 | Inf | last   | singleC     | J1:DiP, J1:DiP-A, J1:OT, J1:OT-A, J5:DiP, J5:DiP-A, J5:OT, J5:OT-A, S1:OT, S1:OT-A, S5:DiP, S5:DiP-A, S5:OT, S5:OT-A                                     |
| 176 | Yes         | 9       | 9-A  | 1000   | McF_4 | Inf | last   | wholeT_0.01 | J1:DiP, J1:OT, J5:DiP, J5:OT, S1:DiP, S5:DiP, S5:OT                                                                                                      |

Table 8: (continued)

|     | Conjunction | Drivers | Tree | S.Size | Model | sh  | S.Time | S.Type      | Best method(s)                                                                                                                                                                               |
|-----|-------------|---------|------|--------|-------|-----|--------|-------------|----------------------------------------------------------------------------------------------------------------------------------------------------------------------------------------------|
| 177 | Yes         | 9       | 9-A  | 1000   | McF_4 | Inf | last   | wholeT_0.5  | J1:DiP, J1:DiP-A, J1:OT, J1:OT-A, J5:DiP, J5:DiP-A, J5:OT, J5:OT-A, S1:DiP, S1:DiP-A, S1:OT, S1:OT-A, S5:DiP, S5:DiP-A, S5:OT, S5:OT-A                                                       |
| 178 | Yes         | 9       | 9-A  | 1000   | McF_4 | Inf | unif   | singleC     | J1:DiP, J1:DiP-A, J1:OT, J1:OT-A, J5:DiP, J5:DiP-A, J5:OT, J5:OT-A, S1:DiP, S1:DiP-A, S1:OT, S1:OT-A, S5:CBN-A, S5:DiP, S5:DiP-A, S5:OT, S5:OT-A                                             |
| 179 | Yes         | 9       | 9-A  | 1000   | McF_4 | Inf | unif   | wholeT_0.01 | J1:DiP, J1:DiP-A, J1:OT, J1:OT-A, J5:DiP, J5:DiP-A, J5:OT, J5:OT-A, S5:CBN-A, S5:DiP, S5:DiP-A, S5:OT, S5:OT-A                                                                               |
| 180 | Yes         | 9       | 9-A  | 1000   | McF_4 | Inf | unif   | wholeT_0.5  | J1:DiP, J1:DiP-A, J1:OT, J1:OT-A, J5:DiP, J5:DiP-A, J5:OT, J5:OT-A, S1:DiP, S1:DiP-A, S1:OT, S1:OT-A, S5:CBN-A, S5:DiP, S5:DiP-A, S5:OT, S5:OT-A                                             |
| 181 | Yes         | 9       | 9-A  | 1000   | McF_6 | 0   | last   | singleC     | J1:DiP, J1:OT, J5:DiP, J5:OT, S1:DiP, S5:DiP, S5:OT                                                                                                                                          |
| 182 | Yes         | 9       | 9-A  | 1000   | McF_6 | 0   | last   | wholeT_0.01 | J1:DiP, J1:OT, J5:DiP, J5:OT, S1:DiP, S5:DiP, S5:OT                                                                                                                                          |
| 183 | Yes         | 9       | 9-A  | 1000   | McF_6 | 0   | last   | wholeT_0.5  | J1:DiP, J1:OT, J5:DiP, J5:OT, S1:DiP, S1:OT, S5:DiP, S5:OT                                                                                                                                   |
| 184 | Yes         | 9       | 9-A  | 1000   | McF_6 | 0   | unif   | singleC     | J1:CBN, J1:CBN-A, J1:DiP, J1:DiP-A, J1:OT, J1:OT-A, J5:CBN, J5:CBN-A, J5:DiP, J5:DiP-A, J5:OT, J5:OT-A, S1:DiP, S1:DiP-A, S1:OT, S1:OT-A, S5:CBN, S5:CBN-A, S5:DiP, S5:DiP-A, S5:OT, S5:OT-A |
| 185 | Yes         | 9       | 9-A  | 1000   | McF_6 | 0   | unif   | wholeT_0.01 | J1:CBN, J1:CBN-A, J1:DiP, J1:DiP-A, J1:OT, J1:OT-A, J5:CBN, J5:CBN-A, J5:DiP, J5:DiP-A, J5:OT, J5:OT-A, S1:DiP, S5:CBN, S5:CBN-A, S5:DiP, S5:DiP-A, S5:OT, S5:OT-A                           |

Table 8: (continued)

|     | Conjunction | Drivers | Tree | S.Size | Model | sh  | S.Time | S.Type      | Best method(s)                                                                                                                                                                                         |
|-----|-------------|---------|------|--------|-------|-----|--------|-------------|--------------------------------------------------------------------------------------------------------------------------------------------------------------------------------------------------------|
| 186 | Yes         | 9       | 9-A  | 1000   | McF_6 | 0   | unif   | wholeT_0.5  | J1:CBN, J1:CBN-A, J1:DiP, J1:DiP-A, J1:OT, J1:OT-A, J5:CBN, J5:CBN-A, J5:DiP, J5:DiP-A, J5:OT, J5:OT-A, S1:CBN-A, S1:DiP, S1:DiP-A, S1:OT, S1:OT-A, S5:CBN, S5:CBN-A, S5:DiP, S5:DiP-A, S5:OT, S5:OT-A |
| 187 | Yes         | 9       | 9-A  | 1000   | McF_6 | Inf | last   | singleC     | J1:DiP, J1:OT, J5:DiP, J5:OT, S1:DiP, S5:DiP, S5:OT                                                                                                                                                    |
| 188 | Yes         | 9       | 9-A  | 1000   | McF_6 | Inf | last   | wholeT_0.01 | J1:DiP, J1:OT, J5:DiP, J5:OT, S5:OT                                                                                                                                                                    |
| 189 | Yes         | 9       | 9-A  | 1000   | McF_6 | Inf | last   | wholeT_0.5  | J1:DiP, J1:OT, J5:DiP, J5:OT, S1:DiP, S5:DiP, S5:OT                                                                                                                                                    |
| 190 | Yes         | 9       | 9-A  | 1000   | McF_6 | Inf | unif   | singleC     | J1:CBN, J1:CBN-A, J1:DiP, J1:DiP-A, J1:OT, J1:OT-A, J5:CBN, J5:CBN-A, J5:DiP, J5:DiP-A, J5:OT, J5:OT-A, S1:DiP, S1:DiP-A, S1:OT, S1:OT-A, S5:CBN, S5:CBN-A, S5:DiP, S5:DiP-A, S5:OT, S5:OT-A           |
| 191 | Yes         | 9       | 9-A  | 1000   | McF_6 | Inf | unif   | wholeT_0.01 | J1:CBN, J1:CBN-A, J1:DiP, J1:DiP-A, J1:OT, J1:OT-A, J5:CBN, J5:CBN-A, J5:DiP, J5:DiP-A, J5:OT, J5:OT-A, S1:DiP, S1:DiP-A, S5:CBN, S5:CBN-A, S5:DiP, S5:DiP-A, S5:OT, S5:OT-A                           |
| 192 | Yes         | 9       | 9-A  | 1000   | McF_6 | Inf | unif   | wholeT_0.5  | J1:CBN, J1:CBN-A, J1:DiP, J1:DiP-A, J1:OT, J1:OT-A, J5:CBN, J5:CBN-A, J5:DiP, J5:DiP-A, J5:OT, J5:OT-A, S1:DiP, S1:DiP-A, S1:OT, S1:OT-A, S5:CBN, S5:CBN-A, S5:DiP, S5:DiP-A, S5:OT, S5:OT-A           |
| 193 | Yes         | 9       | 9-A  | 200    | Bozic | 0   | last   | singleC     | J1:DiP, J1:DiP-A, J1:OT, J1:OT-A, J5:DiP, J5:DiP-A, J5:OT, J5:OT-A, S1:DiP, S1:DiP-A, S1:OT, S1:OT-A, S5:DiP, S5:DiP-A, S5:OT, S5:OT-A                                                                 |
| 194 | Yes         | 9       | 9-A  | 200    | Bozic | 0   | last   | wholeT_0.01 | J1:DiP, J1:DiP-A, J1:OT, J1:OT-A, J5:DiP, J5:DiP-A, J5:OT, J5:OT-A, S1:DiP, S1:DiP-A, S5:DiP, S5:DiP-A, S5:OT, S5:OT-A                                                                                 |
| 195 | Yes         | 9       | 9-A  | 200    | Bozic | 0   | last   | wholeT_0.5  | J1:DiP, J1:DiP-A, J1:OT, J1:OT-A, J5:DiP, J5:DiP-A, J5:OT, J5:OT-A, S1:DiP, S1:DiP-A, S5:DiP, S5:DiP-A, S5:OT, S5:OT-A                                                                                 |

Table 8: (continued)

|     | Conjunction | Drivers | Tree | S.Size | Model | sh  | S.Time | S.Type      | Best method(s)                                                                                                                                           |
|-----|-------------|---------|------|--------|-------|-----|--------|-------------|----------------------------------------------------------------------------------------------------------------------------------------------------------|
| 196 | Yes         | 9       | 9-A  | 200    | Bozic | 0   | unif   | singleC     | J1:DiP, J1:DiP-A, J1:OT, J1:OT-A, J5:CBN, J5:CBN-A, J5:DiP, J5:DiP-A, J5:OT, J5:OT-A, S1:DiP, S1:DiP-A, S1:OT, S1:OT-A, S5:DiP, S5:DiP-A, S5:OT, S5:OT-A |
| 197 | Yes         | 9       | 9-A  | 200    | Bozic | 0   | unif   | wholeT_0.01 | J1:DiP, J1:DiP-A, J1:OT, J1:OT-A, J5:DiP, J5:DiP-A, J5:OT, J5:OT-A, S5:DiP, S5:DiP-A, S5:OT, S5:OT-A                                                     |
| 198 | Yes         | 9       | 9-A  | 200    | Bozic | 0   | unif   | wholeT_0.5  | J1:DiP, J1:DiP-A, J1:OT, J1:OT-A, J5:CBN, J5:CBN-A, J5:DiP, J5:DiP-A, J5:OT, J5:OT-A, S1:DiP, S1:DiP-A, S1:OT, S1:OT-A, S5:DiP, S5:DiP-A, S5:OT, S5:OT-A |
| 199 | Yes         | 9       | 9-A  | 200    | Bozic | Inf | last   | singleC     | J1:DiP, J1:DiP-A, J5:DiP, J5:DiP-A, J5:OT, J5:OT-A, S5:DiP, S5:DiP-A, S5:OT, S5:OT-A                                                                     |
| 200 | Yes         | 9       | 9-A  | 200    | Bozic | Inf | last   | wholeT_0.01 | J5:DiP, J5:DiP-A, J5:OT, J5:OT-A                                                                                                                         |
| 201 | Yes         | 9       | 9-A  | 200    | Bozic | Inf | last   | wholeT_0.5  | J1:DiP, J1:DiP-A, J5:DiP, J5:DiP-A, J5:OT, J5:OT-A, S5:DiP, S5:DiP-A, S5:OT, S5:OT-A                                                                     |
| 202 | Yes         | 9       | 9-A  | 200    | Bozic | Inf | unif   | singleC     | J1:DiP, J1:DiP-A, J1:OT, J1:OT-A, J5:DiP, J5:DiP-A, J5:OT, J5:OT-A, S5:DiP, S5:DiP-A, S5:OT, S5:OT-A                                                     |
| 203 | Yes         | 9       | 9-A  | 200    | Bozic | Inf | unif   | wholeT_0.01 | J5:DiP, J5:DiP-A, J5:OT, J5:OT-A, S5:OT, S5:OT-A                                                                                                         |
| 204 | Yes         | 9       | 9-A  | 200    | Bozic | Inf | unif   | wholeT_0.5  | J1:DiP, J1:DiP-A, J1:OT, J1:OT-A, J5:DiP, J5:DiP-A, J5:OT, J5:OT-A, S5:DiP, S5:DiP-A, S5:OT, S5:OT-A                                                     |
| 205 | Yes         | 9       | 9-A  | 200    | exp   | 0   | last   | singleC     | J1:DiP, J1:DiP-A, J1:OT, J1:OT-A, J5:CBN, J5:CBN-A, J5:DiP, J5:DiP-A, J5:OT, J5:OT-A, S1:DiP, S1:DiP-A, S1:OT, S1:OT-A, S5:DiP, S5:DiP-A, S5:OT, S5:OT-A |
| 206 | Yes         | 9       | 9-A  | 200    | exp   | 0   | last   | wholeT_0.01 | J1:DiP, J1:DiP-A, J1:OT, J1:OT-A, J5:DiP, J5:DiP-A, J5:OT, J5:OT-A, S1:DiP, S1:DiP-A, S1:OT, S1:OT-A, S5:DiP, S5:DiP-A, S5:OT, S5:OT-A                   |

Table 8: (continued)

|     | Conjunction | Drivers | Tree | S.Size | Model | sh  | S.Time | S.Type      | Best method(s)                                                                                                                                                             |
|-----|-------------|---------|------|--------|-------|-----|--------|-------------|----------------------------------------------------------------------------------------------------------------------------------------------------------------------------|
| 207 | Yes         | 9       | 9-A  | 200    | exp   | 0   | last   | wholeT_0.5  | J1:DiP, J1:DiP-A, J1:OT, J1:OT-A, J5:CBN, J5:CBN-A, J5:DiP, J5:DiP-A, J5:OT, J5:OT-A, S1:DiP, S1:DiP-A, S1:OT, S1:OT-A, S5:DiP, S5:DiP-A, S5:OT, S5:OT-A                   |
| 208 | Yes         | 9       | 9-A  | 200    | exp   | 0   | unif   | singleC     | J1:CBN, J1:CBN-A, J1:DiP, J1:DiP-A, J1:OT, J1:OT-A, J5:CBN, J5:CBN-A, J5:DiP, J5:DiP-A, J5:OT, J5:OT-A, S1:DiP, S1:DiP-A, S1:OT, S1:OT-A, S5:DiP, S5:DiP-A, S5:OT, S5:OT-A |
| 209 | Yes         | 9       | 9-A  | 200    | exp   | 0   | unif   | wholeT_0.01 | J1:DiP, J1:DiP-A, J1:OT, J1:OT-A, J5:CBN, J5:CBN-A, J5:DiP, J5:DiP-A, J5:OT, J5:OT-A, S1:DiP, S1:DiP-A, S1:OT, S1:OT-A, S5:DiP, S5:DiP-A, S5:OT, S5:OT-A                   |
| 210 | Yes         | 9       | 9-A  | 200    | exp   | 0   | unif   | wholeT_0.5  | J1:CBN, J1:CBN-A, J1:DiP, J1:DiP-A, J1:OT, J1:OT-A, J5:CBN, J5:CBN-A, J5:DiP, J5:DiP-A, J5:OT, J5:OT-A, S1:DiP, S1:DiP-A, S1:OT, S1:OT-A, S5:DiP, S5:DiP-A, S5:OT, S5:OT-A |
| 211 | Yes         | 9       | 9-A  | 200    | exp   | Inf | last   | singleC     | J1:DiP, J1:DiP-A, J1:OT, J1:OT-A, J5:DiP, J5:DiP-A, J5:OT, J5:OT-A, S1:DiP, S1:DiP-A, S5:DiP, S5:DiP-A, S5:OT, S5:OT-A                                                     |
| 212 | Yes         | 9       | 9-A  | 200    | exp   | Inf | last   | wholeT_0.01 | J5:DiP, J5:DiP-A, J5:OT, J5:OT-A                                                                                                                                           |
| 213 | Yes         | 9       | 9-A  | 200    | exp   | Inf | last   | wholeT_0.5  | J1:DiP, J1:DiP-A, J1:OT, J1:OT-A, J5:DiP, J5:DiP-A, J5:OT, J5:OT-A, S1:DiP, S1:DiP-A, S5:DiP, S5:DiP-A, S5:OT, S5:OT-A                                                     |
| 214 | Yes         | 9       | 9-A  | 200    | exp   | Inf | unif   | singleC     | J1:DiP, J1:DiP-A, J1:OT, J1:OT-A, J5:CBN, J5:CBN-A, J5:DiP, J5:DiP-A, J5:OT, J5:OT-A, S1:DiP, S1:DiP-A, S5:DiP, S5:DiP-A, S5:OT, S5:OT-A                                   |
| 215 | Yes         | 9       | 9-A  | 200    | exp   | Inf | unif   | wholeT_0.01 | J5:DiP, J5:DiP-A, J5:OT, J5:OT-A, S5:DiP, S5:DiP-A, S5:OT, S5:OT-A                                                                                                         |
| 216 | Yes         | 9       | 9-A  | 200    | exp   | Inf | unif   | wholeT_0.5  | J1:DiP, J1:DiP-A, J1:OT, J1:OT-A, J5:CBN, J5:CBN-A, J5:DiP, J5:DiP-A, J5:OT, J5:OT-A, S1:DiP, S1:DiP-A, S1:OT, S1:OT-A, S5:DiP, S5:DiP-A, S5:OT, S5:OT-A                   |

Table 8: (continued)

|     | Conjunction | Drivers | Tree | S.Size | Model | sh  | S.Time | S.Type      | Best method(s)                                                                                                                   |
|-----|-------------|---------|------|--------|-------|-----|--------|-------------|----------------------------------------------------------------------------------------------------------------------------------|
| 217 | Yes         | 9       | 9-A  | 200    | McF_4 | 0   | last   | singleC     | J1:DiP, J1:DiP-A, J1:OT, J1:OT-A, J5:DiP, J5:DiP-A, J5:OT, J5:OT-A, S5:DiP, S5:DiP-A, S5:OT, S5:OT-A                             |
| 218 | Yes         | 9       | 9-A  | 200    | McF_4 | 0   | last   | wholeT_0.01 | J1:DiP, J1:DiP-A, J1:OT, J1:OT-A, J5:DiP, J5:DiP-A, J5:OT, J5:OT-A, S1:DiP, S1:DiP-A, S5:DiP, S5:DiP-A, S5:OT, S5:OT-A           |
| 219 | Yes         | 9       | 9-A  | 200    | McF_4 | 0   | last   | wholeT_0.5  | J1:DiP, J1:DiP-A, J1:OT, J1:OT-A, J5:DiP, J5:DiP-A, J5:OT, J5:OT-A, S1:DiP, S1:DiP-A, S5:DiP, S5:DiP-A, S5:OT, S5:OT-A           |
| 220 | Yes         | 9       | 9-A  | 200    | McF_4 | 0   | unif   | singleC     | J1:DiP, J1:DiP-A, J1:OT, J1:OT-A, J5:DiP, J5:DiP-A, J5:OT, J5:OT-A, S1:DiP, S1:DiP-A, S5:CBN-A, S5:DiP, S5:DiP-A, S5:OT, S5:OT-A |
| 221 | Yes         | 9       | 9-A  | 200    | McF_4 | 0   | unif   | wholeT_0.01 | J1:DiP, J1:DiP-A, J1:OT, J1:OT-A, J5:DiP, J5:DiP-A, J5:OT, J5:OT-A, S1:DiP, S1:DiP-A, S5:CBN-A, S5:DiP, S5:DiP-A, S5:OT, S5:OT-A |
| 222 | Yes         | 9       | 9-A  | 200    | McF_4 | 0   | unif   | wholeT_0.5  | J1:DiP, J1:DiP-A, J1:OT, J1:OT-A, J5:DiP, J5:DiP-A, J5:OT, J5:OT-A, S1:DiP, S1:DiP-A, S5:DiP, S5:DiP-A, S5:OT, S5:OT-A           |
| 223 | Yes         | 9       | 9-A  | 200    | McF_4 | Inf | last   | singleC     | J1:DiP, J1:DiP-A, J5:DiP, J5:DiP-A, J5:OT, J5:OT-A, S5:DiP, S5:DiP-A, S5:OT, S5:OT-A                                             |
| 224 | Yes         | 9       | 9-A  | 200    | McF_4 | Inf | last   | wholeT_0.01 | J1:DiP, J1:DiP-A, J5:DiP, J5:DiP-A, J5:OT, S1:DiP, S5:DiP, S5:DiP-A, S5:OT                                                       |
| 225 | Yes         | 9       | 9-A  | 200    | McF_4 | Inf | last   | wholeT_0.5  | J1:DiP, J1:DiP-A, J1:OT, J1:OT-A, J5:DiP, J5:DiP-A, J5:OT, J5:OT-A, S1:DiP, S1:DiP-A, S5:DiP, S5:DiP-A, S5:OT, S5:OT-A           |
| 226 | Yes         | 9       | 9-A  | 200    | McF_4 | Inf | unif   | singleC     | J1:DiP, J1:DiP-A, J1:OT, J1:OT-A, J5:DiP, J5:DiP-A, J5:OT, J5:OT-A, S1:DiP, S1:DiP-A, S5:DiP, S5:DiP-A, S5:OT, S5:OT-A           |
| 227 | Yes         | 9       | 9-A  | 200    | McF_4 | Inf | unif   | wholeT_0.01 | J1:DiP, J1:DiP-A, J1:OT, J1:OT-A, J5:DiP, J5:DiP-A, J5:OT, J5:OT-A, S1:DiP, S1:DiP-A, S5:DiP, S5:DiP-A, S5:OT, S5:OT-A           |



Table 8: (continued)

|     | Conjunction | Drivers | Tree | S.Size | Model | sh  | S.Time | S.Type      | Best method(s)                                                                                                                                                               |
|-----|-------------|---------|------|--------|-------|-----|--------|-------------|------------------------------------------------------------------------------------------------------------------------------------------------------------------------------|
| 228 | Yes         | 9       | 9-A  | 200    | McF_4 | Inf | unif   | wholeT_0.5  | J1:DiP, J1:DiP-A, J1:OT, J1:OT-A, J5:DiP, J5:DiP-A, J5:OT, J5:OT-A, S1:DiP, S1:DiP-A, S5:CBN-A, S5:DiP, S5:DiP-A, S5:OT, S5:OT-A                                             |
| 229 | Yes         | 9       | 9-A  | 200    | McF_6 | 0   | last   | singleC     | J1:DiP, J1:OT, J5:DiP, J5:OT, S1:DiP, S5:DiP, S5:OT                                                                                                                          |
| 230 | Yes         | 9       | 9-A  | 200    | McF_6 | 0   | last   | wholeT_0.01 | J1:DiP, J5:DiP, J5:OT, S1:DiP, S5:DiP, S5:OT                                                                                                                                 |
| 231 | Yes         | 9       | 9-A  | 200    | McF_6 | 0   | last   | wholeT_0.5  | J1:DiP, J1:OT, J5:DiP, J5:OT, S1:DiP, S5:DiP, S5:OT                                                                                                                          |
| 232 | Yes         | 9       | 9-A  | 200    | McF_6 | 0   | unif   | singleC     | J1:CBN, J1:CBN-A, J1:DiP, J1:DiP-A, J1:OT, J1:OT-A, J5:CBN, J5:CBN-A, J5:DiP, J5:DiP-A, J5:OT, J5:OT-A, S1:DiP, S1:DiP-A, S5:CBN, S5:CBN-A, S5:DiP, S5:DiP-A, S5:OT, S5:OT-A |
| 233 | Yes         | 9       | 9-A  | 200    | McF_6 | 0   | unif   | wholeT_0.01 | J1:CBN, J1:CBN-A, J1:DiP, J1:DiP-A, J1:OT, J1:OT-A, J5:CBN, J5:CBN-A, J5:DiP, J5:DiP-A, J5:OT, J5:OT-A, S1:DiP, S1:DiP-A, S5:CBN, S5:CBN-A, S5:DiP, S5:DiP-A, S5:OT, S5:OT-A |
| 234 | Yes         | 9       | 9-A  | 200    | McF_6 | 0   | unif   | wholeT_0.5  | J1:CBN, J1:CBN-A, J1:DiP, J1:DiP-A, J1:OT, J1:OT-A, J5:CBN, J5:CBN-A, J5:DiP, J5:DiP-A, J5:OT, J5:OT-A, S1:DiP, S1:DiP-A, S5:CBN, S5:CBN-A, S5:DiP, S5:DiP-A, S5:OT, S5:OT-A |
| 235 | Yes         | 9       | 9-A  | 200    | McF_6 | Inf | last   | singleC     | J1:DiP, J1:OT, J5:DiP, J5:OT, S1:DiP, S5:DiP, S5:OT                                                                                                                          |
| 236 | Yes         | 9       | 9-A  | 200    | McF_6 | Inf | last   | wholeT_0.01 | J1:DiP, J5:DiP, J5:OT, S1:DiP, S5:DiP, S5:OT                                                                                                                                 |
| 237 | Yes         | 9       | 9-A  | 200    | McF_6 | Inf | last   | wholeT_0.5  | J1:DiP, J1:OT, J5:DiP, J5:OT, S1:DiP, S5:DiP, S5:OT                                                                                                                          |
| 238 | Yes         | 9       | 9-A  | 200    | McF_6 | Inf | unif   | singleC     | J1:CBN, J1:CBN-A, J1:DiP, J1:DiP-A, J1:OT, J1:OT-A, J5:CBN, J5:CBN-A, J5:DiP, J5:DiP-A, J5:OT, J5:OT-A, S1:DiP, S1:DiP-A, S5:CBN, S5:CBN-A, S5:DiP, S5:DiP-A, S5:OT, S5:OT-A |

Table 8: (continued)

|     | Conjunction | Drivers | Tree | S.Size | Model | sh  | S.Time | S.Type      | Best method(s)                                                                                                                                                               |
|-----|-------------|---------|------|--------|-------|-----|--------|-------------|------------------------------------------------------------------------------------------------------------------------------------------------------------------------------|
| 239 | Yes         | 9       | 9-A  | 200    | McF_6 | Inf | unif   | wholeT_0.01 | J1:CBN, J1:CBN-A, J1:DiP, J1:DiP-A, J1:OT, J1:OT-A, J5:CBN, J5:CBN-A, J5:DiP, J5:DiP-A, J5:OT, J5:OT-A, S1:DiP, S5:CBN, S5:CBN-A, S5:DiP, S5:DiP-A, S5:OT, S5:OT-A           |
| 240 | Yes         | 9       | 9-A  | 200    | McF_6 | Inf | unif   | wholeT_0.5  | J1:CBN, J1:CBN-A, J1:DiP, J1:DiP-A, J1:OT, J1:OT-A, J5:CBN, J5:CBN-A, J5:DiP, J5:DiP-A, J5:OT, J5:OT-A, S1:DiP, S1:DiP-A, S5:CBN, S5:CBN-A, S5:DiP, S5:DiP-A, S5:OT, S5:OT-A |
| 241 | Yes         | 9       | 9-A  | 100    | Bozic | 0   | last   | singleC     | J1:DiP, J1:DiP-A, J1:OT, J1:OT-A, J5:DiP, J5:DiP-A, J5:OT, J5:OT-A, S1:DiP, S1:DiP-A, S5:DiP, S5:DiP-A, S5:OT, S5:OT-A                                                       |
| 242 | Yes         | 9       | 9-A  | 100    | Bozic | 0   | last   | wholeT_0.01 | J1:DiP, J1:DiP-A, J5:DiP, J5:DiP-A, J5:OT, J5:OT-A, S1:DiP, S1:DiP-A, S5:DiP, S5:DiP-A, S5:OT, S5:OT-A                                                                       |
| 243 | Yes         | 9       | 9-A  | 100    | Bozic | 0   | last   | wholeT_0.5  | J1:DiP, J1:DiP-A, J1:OT, J1:OT-A, J5:DiP, J5:DiP-A, J5:OT, J5:OT-A, S1:DiP, S1:DiP-A, S5:DiP, S5:DiP-A, S5:OT, S5:OT-A                                                       |
| 244 | Yes         | 9       | 9-A  | 100    | Bozic | 0   | unif   | singleC     | J1:DiP, J1:DiP-A, J1:OT, J1:OT-A, J5:CBN, J5:CBN-A, J5:DiP, J5:DiP-A, J5:OT, J5:OT-A, S1:DiP, S1:DiP-A, S5:DiP, S5:DiP-A, S5:OT, S5:OT-A                                     |
| 245 | Yes         | 9       | 9-A  | 100    | Bozic | 0   | unif   | wholeT_0.01 | J1:DiP, J1:DiP-A, J5:DiP, J5:DiP-A, J5:OT, J5:OT-A, S1:DiP, S1:DiP-A, S5:DiP, S5:DiP-A, S5:OT, S5:OT-A                                                                       |
| 246 | Yes         | 9       | 9-A  | 100    | Bozic | 0   | unif   | wholeT_0.5  | J1:DiP, J1:DiP-A, J1:OT, J1:OT-A, J5:CBN, J5:CBN-A, J5:DiP, J5:DiP-A, J5:OT, J5:OT-A, S1:DiP, S1:DiP-A, S5:DiP, S5:DiP-A, S5:OT, S5:OT-A                                     |
| 247 | Yes         | 9       | 9-A  | 100    | Bozic | Inf | last   | singleC     | J1:DiP, J1:DiP-A, J5:DiP, J5:DiP-A, J5:OT, J5:OT-A, S1:DiP, S1:DiP-A, S5:DiP, S5:DiP-A                                                                                       |
| 248 | Yes         | 9       | 9-A  | 100    | Bozic | Inf | last   | wholeT_0.01 | J5:DiP, J5:DiP-A                                                                                                                                                             |
| 249 | Yes         | 9       | 9-A  | 100    | Bozic | Inf | last   | wholeT_0.5  | J1:DiP, J1:DiP-A, J5:DiP, J5:DiP-A, J5:OT, J5:OT-A, S1:DiP, S1:DiP-A, S5:DiP, S5:DiP-A                                                                                       |

Table 8: (continued)

|     | Conjunction | Drivers | Tree | S.Size | Model | sh  | S.Time | S.Type      | Best method(s)                                                                                                                                                             |
|-----|-------------|---------|------|--------|-------|-----|--------|-------------|----------------------------------------------------------------------------------------------------------------------------------------------------------------------------|
| 250 | Yes         | 9       | 9-A  | 100    | Bozic | Inf | unif   | singleC     | J1:DiP, J1:DiP-A, J5:DiP, J5:DiP-A, J5:OT, J5:OT-A, S1:DiP, S1:DiP-A, S5:DiP, S5:DiP-A, S5:OT, S5:OT-A                                                                     |
| 251 | Yes         | 9       | 9-A  | 100    | Bozic | Inf | unif   | wholeT_0.01 | J5:DiP, J5:DiP-A, J5:OT, J5:OT-A                                                                                                                                           |
| 252 | Yes         | 9       | 9-A  | 100    | Bozic | Inf | unif   | wholeT_0.5  | J1:DiP, J1:DiP-A, J5:DiP, J5:DiP-A, J5:OT, J5:OT-A, S5:DiP, S5:DiP-A, S5:OT, S5:OT-A                                                                                       |
| 253 | Yes         | 9       | 9-A  | 100    | exp   | 0   | last   | singleC     | J1:DiP, J1:DiP-A, J1:OT, J1:OT-A, J5:CBN, J5:CBN-A, J5:DiP, J5:DiP-A, J5:OT, J5:OT-A, S1:DiP, S1:DiP-A, S5:DiP, S5:DiP-A, S5:OT, S5:OT-A                                   |
| 254 | Yes         | 9       | 9-A  | 100    | exp   | 0   | last   | wholeT_0.01 | J1:DiP, J1:DiP-A, J1:OT, J1:OT-A, J5:DiP, J5:DiP-A, J5:OT, J5:OT-A, S1:DiP, S1:DiP-A, S5:DiP, S5:DiP-A, S5:OT, S5:OT-A                                                     |
| 255 | Yes         | 9       | 9-A  | 100    | exp   | 0   | last   | wholeT_0.5  | J1:DiP, J1:DiP-A, J1:OT, J1:OT-A, J5:CBN, J5:CBN-A, J5:DiP, J5:DiP-A, J5:OT, J5:OT-A, S1:DiP, S1:DiP-A, S1:OT, S1:OT-A, S5:DiP, S5:DiP-A, S5:OT, S5:OT-A                   |
| 256 | Yes         | 9       | 9-A  | 100    | exp   | 0   | unif   | singleC     | J1:CBN, J1:CBN-A, J1:DiP, J1:DiP-A, J1:OT, J1:OT-A, J5:CBN, J5:CBN-A, J5:DiP, J5:DiP-A, J5:OT, J5:OT-A, S1:DiP, S1:DiP-A, S1:OT, S1:OT-A, S5:DiP, S5:DiP-A, S5:OT, S5:OT-A |
| 257 | Yes         | 9       | 9-A  | 100    | exp   | 0   | unif   | wholeT_0.01 | J1:DiP, J1:DiP-A, J1:OT, J1:OT-A, J5:CBN, J5:CBN-A, J5:DiP, J5:DiP-A, J5:OT, J5:OT-A, S1:DiP, S1:DiP-A, S5:DiP, S5:DiP-A, S5:OT, S5:OT-A                                   |
| 258 | Yes         | 9       | 9-A  | 100    | exp   | 0   | unif   | wholeT_0.5  | J1:DiP, J1:DiP-A, J1:OT, J1:OT-A, J5:CBN, J5:CBN-A, J5:DiP, J5:DiP-A, J5:OT, J5:OT-A, S1:DiP, S1:DiP-A, S1:OT, S1:OT-A, S5:DiP, S5:DiP-A, S5:OT, S5:OT-A                   |
| 259 | Yes         | 9       | 9-A  | 100    | exp   | Inf | last   | singleC     | J1:DiP, J1:DiP-A, J5:DiP, J5:DiP-A, J5:OT, J5:OT-A, S1:DiP, S1:DiP-A, S5:DiP, S5:DiP-A, S5:OT, S5:OT-A                                                                     |
| 260 | Yes         | 9       | 9-A  | 100    | exp   | Inf | last   | wholeT_0.01 | J5:DiP, J5:DiP-A, J5:OT, J5:OT-A                                                                                                                                           |

Table 8: (continued)

|     | Conjunction | Drivers | Tree | S.Size | Model | sh  | S.Time | S.Type      | Best method(s)                                                                                                                           |
|-----|-------------|---------|------|--------|-------|-----|--------|-------------|------------------------------------------------------------------------------------------------------------------------------------------|
| 261 | Yes         | 9       | 9-A  | 100    | exp   | Inf | last   | wholeT_0.5  | J1:DiP, J1:DiP-A, J5:DiP, J5:DiP-A, J5:OT, J5:OT-A, S1:DiP, S1:DiP-A, S5:DiP, S5:DiP-A, S5:OT, S5:OT-A                                   |
| 262 | Yes         | 9       | 9-A  | 100    | exp   | Inf | unif   | singleC     | J1:DiP, J1:DiP-A, J5:CBN, J5:CBN-A, J5:DiP, J5:DiP-A, J5:OT, J5:OT-A, S1:DiP, S1:DiP-A, S5:DiP, S5:DiP-A, S5:OT, S5:OT-A                 |
| 263 | Yes         | 9       | 9-A  | 100    | exp   | Inf | unif   | wholeT_0.01 | J5:DiP, J5:DiP-A, J5:OT, J5:OT-A, S5:DiP, S5:DiP-A, S5:OT, S5:OT-A                                                                       |
| 264 | Yes         | 9       | 9-A  | 100    | exp   | Inf | unif   | wholeT_0.5  | J1:DiP, J1:DiP-A, J1:OT, J1:OT-A, J5:CBN, J5:CBN-A, J5:DiP, J5:DiP-A, J5:OT, J5:OT-A, S1:DiP, S1:DiP-A, S5:DiP, S5:DiP-A, S5:OT, S5:OT-A |
| 265 | Yes         | 9       | 9-A  | 100    | McF_4 | 0   | last   | singleC     | J1:DiP, J1:DiP-A, J5:DiP, J5:DiP-A, J5:OT, J5:OT-A, S1:DiP, S1:DiP-A, S5:DiP, S5:DiP-A, S5:OT, S5:OT-A                                   |
| 266 | Yes         | 9       | 9-A  | 100    | McF_4 | 0   | last   | wholeT_0.01 | J1:DiP, J1:DiP-A, J5:DiP, J5:DiP-A, J5:OT, J5:OT-A, S1:DiP, S1:DiP-A, S5:DiP, S5:DiP-A, S5:OT, S5:OT-A                                   |
| 267 | Yes         | 9       | 9-A  | 100    | McF_4 | 0   | last   | wholeT_0.5  | J1:DiP, J1:DiP-A, J5:DiP, J5:DiP-A, J5:OT, J5:OT-A, S1:DiP, S1:DiP-A, S5:DiP, S5:DiP-A, S5:OT, S5:OT-A                                   |
| 268 | Yes         | 9       | 9-A  | 100    | McF_4 | 0   | unif   | singleC     | J1:DiP, J1:DiP-A, J5:DiP, J5:DiP-A, J5:OT, J5:OT-A, S1:DiP, S1:DiP-A, S5:CBN-A, S5:DiP, S5:DiP-A, S5:OT, S5:OT-A                         |
| 269 | Yes         | 9       | 9-A  | 100    | McF_4 | 0   | unif   | wholeT_0.01 | J1:DiP, J1:DiP-A, J5:DiP, J5:DiP-A, J5:OT, J5:OT-A, S5:DiP, S5:DiP-A, S5:OT, S5:OT-A                                                     |
| 270 | Yes         | 9       | 9-A  | 100    | McF_4 | 0   | unif   | wholeT_0.5  | J1:DiP, J1:DiP-A, J1:OT, J1:OT-A, J5:DiP, J5:DiP-A, J5:OT, J5:OT-A, S1:DiP, S1:DiP-A, S5:CBN-A, S5:DiP, S5:DiP-A, S5:OT, S5:OT-A         |
| 271 | Yes         | 9       | 9-A  | 100    | McF_4 | Inf | last   | singleC     | J1:DiP, J1:DiP-A, J5:DiP, J5:DiP-A, J5:OT, J5:OT-A, S1:DiP, S1:DiP-A, S5:DiP, S5:DiP-A, S5:OT, S5:OT-A                                   |
| 272 | Yes         | 9       | 9-A  | 100    | McF_4 | Inf | last   | wholeT_0.01 | J1:DiP, J5:DiP, J5:OT, S1:DiP, S5:DiP, S5:OT                                                                                             |

Table 8: (continued)

|     | Conjunction | Drivers | Tree | S.Size | Model | sh  | S.Time | S.Type      | Best method(s)                                                                                                                                              |
|-----|-------------|---------|------|--------|-------|-----|--------|-------------|-------------------------------------------------------------------------------------------------------------------------------------------------------------|
| 273 | Yes         | 9       | 9-A  | 100    | McF_4 | Inf | last   | wholeT_0.5  | J1:DiP, J1:DiP-A, J5:DiP, J5:DiP-A, J5:OT, J5:OT-A, S1:DiP, S1:DiP-A, S5:DiP, S5:DiP-A, S5:OT, S5:OT-A                                                      |
| 274 | Yes         | 9       | 9-A  | 100    | McF_4 | Inf | unif   | singleC     | J1:DiP, J1:DiP-A, J1:OT, J1:OT-A, J5:DiP, J5:DiP-A, J5:OT, J5:OT-A, S1:DiP, S1:DiP-A, S5:CBN-A, S5:DiP, S5:DiP-A, S5:OT, S5:OT-A                            |
| 275 | Yes         | 9       | 9-A  | 100    | McF_4 | Inf | unif   | wholeT_0.01 | J1:DiP, J1:DiP-A, J5:DiP, J5:DiP-A, J5:OT, J5:OT-A, S5:DiP, S5:DiP-A, S5:OT, S5:OT-A                                                                        |
| 276 | Yes         | 9       | 9-A  | 100    | McF_4 | Inf | unif   | wholeT_0.5  | J1:DiP, J1:DiP-A, J1:OT, J1:OT-A, J5:DiP, J5:DiP-A, J5:OT, J5:OT-A, S1:DiP, S1:DiP-A, S5:DiP, S5:DiP-A, S5:OT, S5:OT-A                                      |
| 277 | Yes         | 9       | 9-A  | 100    | McF_6 | 0   | last   | singleC     | J1:DiP, J5:DiP, J5:OT, S1:DiP, S5:DiP, S5:OT                                                                                                                |
| 278 | Yes         | 9       | 9-A  | 100    | McF_6 | 0   | last   | wholeT_0.01 | J1:DiP, J5:DiP, J5:OT, S1:DiP, S5:DiP, S5:OT                                                                                                                |
| 279 | Yes         | 9       | 9-A  | 100    | McF_6 | 0   | last   | wholeT_0.5  | J1:DiP, J5:DiP, J5:OT, S1:DiP, S5:DiP, S5:OT                                                                                                                |
| 280 | Yes         | 9       | 9-A  | 100    | McF_6 | 0   | unif   | singleC     | J1:CBN, J1:CBN-A, J1:DiP, J1:DiP-A, J1:OT, J5:CBN, J5:CBN-A, J5:DiP, J5:DiP-A, J5:OT, J5:OT-A, S1:DiP, S1:DiP-A, S5:CBN, S5:CBN-A, S5:DiP, S5:DiP-A, S5:OT  |
| 281 | Yes         | 9       | 9-A  | 100    | McF_6 | 0   | unif   | wholeT_0.01 | J1:DiP, J1:DiP-A, J5:CBN, J5:CBN-A, J5:DiP, J5:DiP-A, J5:OT, J5:OT-A, S5:CBN, S5:DiP, S5:DiP-A, S5:OT, S5:OT-A                                              |
| 282 | Yes         | 9       | 9-A  | 100    | McF_6 | 0   | unif   | wholeT_0.5  | J1:CBN, J1:CBN-A, J1:DiP, J1:DiP-A, J1:OT, J5:CBN, J5:CBN-A, J5:DiP, J5:DiP-A, J5:OT, J5:OT-A, S1:DiP, S1:DiP-A, S5:CBN-A, S5:DiP, S5:DiP-A, S5:OT, S5:OT-A |
| 283 | Yes         | 9       | 9-A  | 100    | McF_6 | Inf | last   | singleC     | J1:DiP, J1:DiP-A, J1:OT, J5:DiP, J5:DiP-A, J5:OT, S1:DiP, S1:DiP-A, S5:DiP, S5:DiP-A, S5:OT                                                                 |
| 284 | Yes         | 9       | 9-A  | 100    | McF_6 | Inf | last   | wholeT_0.01 | J1:DiP, J5:DiP, J5:OT, S1:DiP, S5:DiP, S5:OT                                                                                                                |

Table 8: (continued)

|     | Conjunction | Drivers | Tree | S.Size | Model | sh  | S.Time | S.Type      | Best method(s)                                                                                                                                                                               |
|-----|-------------|---------|------|--------|-------|-----|--------|-------------|----------------------------------------------------------------------------------------------------------------------------------------------------------------------------------------------|
| 285 | Yes         | 9       | 9-A  | 100    | McF_6 | Inf | last   | wholeT_0.5  | J1:DiP, J1:DiP-A, J5:DiP, J5:DiP-A, J5:OT, S1:DiP, S5:DiP, S5:DiP-A, S5:OT                                                                                                                   |
| 286 | Yes         | 9       | 9-A  | 100    | McF_6 | Inf | unif   | singleC     | J1:CBN-A, J1:DiP, J1:DiP-A, J5:CBN, J5:CBN-A, J5:DiP, J5:DiP-A, J5:OT, J5:OT-A, S1:DiP, S1:DiP-A, S5:CBN, S5:CBN-A, S5:DiP, S5:DiP-A, S5:OT, S5:OT-A                                         |
| 287 | Yes         | 9       | 9-A  | 100    | McF_6 | Inf | unif   | wholeT_0.01 | J1:DiP, J5:CBN-A, J5:DiP, J5:DiP-A, J5:OT, J5:OT-A, S1:DiP, S5:CBN, S5:DiP, S5:OT, S5:OT-A                                                                                                   |
| 288 | Yes         | 9       | 9-A  | 100    | McF_6 | Inf | unif   | wholeT_0.5  | J1:CBN, J1:CBN-A, J1:DiP, J1:DiP-A, J1:OT, J1:OT-A, J5:CBN, J5:CBN-A, J5:DiP, J5:DiP-A, J5:OT, J5:OT-A, S1:DiP, S1:DiP-A, S5:CBN-A, S5:DiP, S5:DiP-A, S5:OT, S5:OT-A                         |
| 289 | Yes         | 7       | 7-A  | 1000   | Bozic | 0   | last   | singleC     | J1:CBN, J1:CBN-A, J1:DiP, J1:DiP-A, J1:OT, J1:OT-A, J5:CBN, J5:CBN-A, J5:DiP, J5:DiP-A, J5:OT, J5:OT-A, S1:DiP, S1:DiP-A, S1:OT, S1:OT-A, S5:DiP, S5:DiP-A, S5:OT, S5:OT-A                   |
| 290 | Yes         | 7       | 7-A  | 1000   | Bozic | 0   | last   | wholeT_0.01 | none                                                                                                                                                                                         |
| 291 | Yes         | 7       | 7-A  | 1000   | Bozic | 0   | last   | wholeT_0.5  | J1:CBN, J1:CBN-A, J1:DiP, J1:DiP-A, J1:OT, J1:OT-A, J5:CBN, J5:CBN-A, J5:DiP, J5:DiP-A, J5:OT, J5:OT-A, S1:DiP, S1:DiP-A, S1:OT, S1:OT-A, S5:CBN, S5:CBN-A, S5:DiP, S5:DiP-A, S5:OT, S5:OT-A |
| 292 | Yes         | 7       | 7-A  | 1000   | Bozic | 0   | unif   | singleC     | none                                                                                                                                                                                         |
| 293 | Yes         | 7       | 7-A  | 1000   | Bozic | 0   | unif   | wholeT_0.01 | J5:CBN, J5:CBN-A, J5:DiP, J5:DiP-A, J5:OT, J5:OT-A                                                                                                                                           |
| 294 | Yes         | 7       | 7-A  | 1000   | Bozic | 0   | unif   | wholeT_0.5  | none                                                                                                                                                                                         |
| 295 | Yes         | 7       | 7-A  | 1000   | Bozic | Inf | last   | singleC     | J1:DiP, J1:DiP-A, J1:OT, J1:OT-A, J5:DiP, J5:DiP-A, J5:OT, J5:OT-A, S1:DiP, S1:DiP-A, S5:DiP, S5:DiP-A, S5:OT, S5:OT-A                                                                       |
| 296 | Yes         | 7       | 7-A  | 1000   | Bozic | Inf | last   | wholeT_0.01 | J5:CBN, J5:CBN-A, J5:DiP, J5:OT                                                                                                                                                              |
| 297 | Yes         | 7       | 7-A  | 1000   | Bozic | Inf | last   | wholeT_0.5  | J1:DiP, J1:DiP-A, J1:OT, J1:OT-A, J5:DiP, J5:DiP-A, J5:OT, J5:OT-A, S1:DiP, S1:DiP-A, S5:DiP, S5:DiP-A, S5:OT, S5:OT-A                                                                       |

Table 8: (continued)

|     | Conjunction | Drivers | Tree | S.Size | Model | sh  | S.Time | S.Type      | Best method(s)                                                                                                                                                                               |
|-----|-------------|---------|------|--------|-------|-----|--------|-------------|----------------------------------------------------------------------------------------------------------------------------------------------------------------------------------------------|
| 298 | Yes         | 7       | 7-A  | 1000   | Bozic | Inf | unif   | singleC     | J1:CBN, J1:CBN-A, J5:CBN, J5:CBN-A, J5:DiP, J5:DiP-A, J5:OT, J5:OT-A, S1:CBN, S1:CBN-A, S5:CBN, S5:CBN-A                                                                                     |
| 299 | Yes         | 7       | 7-A  | 1000   | Bozic | Inf | unif   | wholeT_0.01 | J5:CBN, J5:CBN-A, S5:CBN, S5:CBN-A                                                                                                                                                           |
| 300 | Yes         | 7       | 7-A  | 1000   | Bozic | Inf | unif   | wholeT_0.5  | J1:CBN, J1:CBN-A, J5:CBN, J5:CBN-A, J5:DiP, J5:DiP-A, J5:OT, J5:OT-A, S1:CBN, S1:CBN-A, S5:CBN, S5:CBN-A, S5:DiP, S5:DiP-A, S5:OT, S5:OT-A                                                   |
| 301 | Yes         | 7       | 7-A  | 1000   | exp   | 0   | last   | singleC     | J1:CBN, J1:CBN-A, J1:DiP, J1:DiP-A, J1:OT, J1:OT-A, J5:CBN, J5:CBN-A, J5:DiP, J5:DiP-A, J5:OT, J5:OT-A, S1:DiP, S1:DiP-A, S1:OT, S1:OT-A, S5:CBN, S5:CBN-A, S5:DiP, S5:DiP-A, S5:OT, S5:OT-A |
| 302 | Yes         | 7       | 7-A  | 1000   | exp   | 0   | last   | wholeT_0.01 | none                                                                                                                                                                                         |
| 303 | Yes         | 7       | 7-A  | 1000   | exp   | 0   | last   | wholeT_0.5  | J1:CBN, J1:CBN-A, J1:DiP, J1:DiP-A, J1:OT, J1:OT-A, J5:CBN, J5:CBN-A, J5:DiP, J5:DiP-A, J5:OT, J5:OT-A, S1:DiP, S1:DiP-A, S1:OT, S1:OT-A, S5:CBN, S5:CBN-A, S5:DiP, S5:DiP-A, S5:OT, S5:OT-A |
| 304 | Yes         | 7       | 7-A  | 1000   | exp   | 0   | unif   | singleC     | none                                                                                                                                                                                         |
| 305 | Yes         | 7       | 7-A  | 1000   | exp   | 0   | unif   | wholeT_0.01 | J1:CBN, J1:CBN-A, J1:DiP, J1:DiP-A, J1:OT, J1:OT-A, J5:CBN, J5:CBN-A, J5:DiP, J5:DiP-A, J5:OT, J5:OT-A, S5:CBN, S5:CBN-A, S5:DiP, S5:DiP-A, S5:OT, S5:OT-A                                   |
| 306 | Yes         | 7       | 7-A  | 1000   | exp   | 0   | unif   | wholeT_0.5  | none                                                                                                                                                                                         |
| 307 | Yes         | 7       | 7-A  | 1000   | exp   | Inf | last   | singleC     | J1:DiP, J1:DiP-A, J1:OT, J1:OT-A, J5:CBN, J5:CBN-A, J5:DiP, J5:DiP-A, J5:OT, J5:OT-A, S1:DiP, S1:DiP-A, S5:DiP, S5:DiP-A, S5:OT, S5:OT-A                                                     |
| 308 | Yes         | 7       | 7-A  | 1000   | exp   | Inf | last   | wholeT_0.01 | J1:CBN-A, J5:CBN, J5:CBN-A, J5:DiP, J5:DiP-A, J5:OT, J5:OT-A, S5:CBN, S5:CBN-A, S5:DiP, S5:DiP-A, S5:OT, S5:OT-A                                                                             |

Table 8: (continued)

|     | Conjunction | Drivers | Tree | S.Size | Model | sh  | S.Time | S.Type      | Best method(s)                                                                                                                                                                                 |
|-----|-------------|---------|------|--------|-------|-----|--------|-------------|------------------------------------------------------------------------------------------------------------------------------------------------------------------------------------------------|
| 309 | Yes         | 7       | 7-A  | 1000   | exp   | Inf | last   | wholeT_0.5  | J1:DiP, J1:DiP-A, J1:OT, J1:OT-A, J5:CBN, J5:CBN-A, J5:DiP, J5:DiP-A, J5:OT, J5:OT-A, S1:DiP, S1:DiP-A, S1:OT, S1:OT-A, S5:DiP, S5:DiP-A, S5:OT, S5:OT-A                                       |
| 310 | Yes         | 7       | 7-A  | 1000   | exp   | Inf | unif   | singleC     | J1:CBN, J1:CBN-A, J1:DiP, J1:DiP-A, J1:OT, J1:OT-A, J5:CBN, J5:CBN-A, J5:DiP, J5:DiP-A, J5:OT, J5:OT-A, S1:CBN, S1:CBN-A, S1:DiP, S1:DiP-A, S5:CBN, S5:CBN-A, S5:DiP, S5:DiP-A, S5:OT, S5:OT-A |
| 311 | Yes         | 7       | 7-A  | 1000   | exp   | Inf | unif   | wholeT_0.01 | J1:CBN, J1:CBN-A, J5:CBN, J5:CBN-A, S5:CBN, S5:CBN-A                                                                                                                                           |
| 312 | Yes         | 7       | 7-A  | 1000   | exp   | Inf | unif   | wholeT_0.5  | J1:CBN, J1:CBN-A, J1:DiP, J1:DiP-A, J1:OT, J1:OT-A, J5:CBN, J5:CBN-A, J5:DiP, J5:DiP-A, J5:OT, J5:OT-A, S1:CBN, S1:CBN-A, S5:CBN, S5:CBN-A, S5:DiP, S5:DiP-A, S5:OT, S5:OT-A                   |
| 313 | Yes         | 7       | 7-A  | 1000   | McF_4 | 0   | last   | singleC     | J1:DiP, J1:DiP-A, J1:OT, J1:OT-A, J5:DiP, J5:DiP-A, J5:OT, J5:OT-A, S1:DiP, S1:DiP-A, S1:OT, S1:OT-A, S5:DiP, S5:DiP-A, S5:OT, S5:OT-A                                                         |
| 314 | Yes         | 7       | 7-A  | 1000   | McF_4 | 0   | last   | wholeT_0.01 | J1:DiP-A, J1:OT, J1:OT-A, J5:DiP, J5:DiP-A, J5:OT, J5:OT-A, S5:OT, S5:OT-A                                                                                                                     |
| 315 | Yes         | 7       | 7-A  | 1000   | McF_4 | 0   | last   | wholeT_0.5  | J1:DiP, J1:DiP-A, J1:OT, J1:OT-A, J5:DiP, J5:DiP-A, J5:OT, J5:OT-A, S1:DiP, S1:DiP-A, S1:OT, S1:OT-A, S5:DiP, S5:DiP-A, S5:OT, S5:OT-A                                                         |
| 316 | Yes         | 7       | 7-A  | 1000   | McF_4 | 0   | unif   | singleC     | none                                                                                                                                                                                           |
| 317 | Yes         | 7       | 7-A  | 1000   | McF_4 | 0   | unif   | wholeT_0.01 | J1:CBN, J1:CBN-A, J1:DiP, J1:DiP-A, J1:OT, J1:OT-A, J5:CBN, J5:CBN-A, J5:DiP, J5:DiP-A, J5:OT, J5:OT-A, S1:DiP, S1:DiP-A, S5:CBN, S5:CBN-A, S5:DiP, S5:DiP-A, S5:OT, S5:OT-A                   |
| 318 | Yes         | 7       | 7-A  | 1000   | McF_4 | 0   | unif   | wholeT_0.5  | none                                                                                                                                                                                           |
| 319 | Yes         | 7       | 7-A  | 1000   | McF_4 | Inf | last   | singleC     | J1:DiP, J1:DiP-A, J1:OT, J1:OT-A, J5:DiP, J5:DiP-A, J5:OT, J5:OT-A, S1:DiP, S1:DiP-A, S1:OT, S1:OT-A, S5:DiP, S5:DiP-A, S5:OT, S5:OT-A                                                         |



Table 8: (continued)

|     | Conjunction | Drivers | Tree | S.Size | Model | sh  | S.Time | S.Type      | Best method(s)                                                                                                                                                               |
|-----|-------------|---------|------|--------|-------|-----|--------|-------------|------------------------------------------------------------------------------------------------------------------------------------------------------------------------------|
| 320 | Yes         | 7       | 7-A  | 1000   | McF_4 | Inf | last   | wholeT_0.01 | J1:DiP, J1:DiP-A, J5:DiP, J5:DiP-A, J5:OT, J5:OT-A, S5:DiP, S5:DiP-A, S5:OT, S5:OT-A                                                                                         |
| 321 | Yes         | 7       | 7-A  | 1000   | McF_4 | Inf | last   | wholeT_0.5  | J1:DiP, J1:DiP-A, J1:OT, J1:OT-A, J5:DiP, J5:DiP-A, J5:OT, J5:OT-A, S1:DiP, S1:DiP-A, S1:OT, S1:OT-A, S5:DiP, S5:DiP-A, S5:OT, S5:OT-A                                       |
| 322 | Yes         | 7       | 7-A  | 1000   | McF_4 | Inf | unif   | singleC     | none                                                                                                                                                                         |
| 323 | Yes         | 7       | 7-A  | 1000   | McF_4 | Inf | unif   | wholeT_0.01 | J1:CBN, J1:CBN-A, J1:DiP, J1:DiP-A, J1:OT, J1:OT-A, J5:CBN, J5:CBN-A, J5:DiP, J5:DiP-A, J5:OT, J5:OT-A, S1:DiP, S1:DiP-A, S5:CBN, S5:CBN-A, S5:DiP, S5:DiP-A, S5:OT, S5:OT-A |
| 324 | Yes         | 7       | 7-A  | 1000   | McF_4 | Inf | unif   | wholeT_0.5  | none                                                                                                                                                                         |
| 325 | Yes         | 7       | 7-A  | 1000   | McF_6 | 0   | last   | singleC     | J1:DiP, J1:OT, J1:OT-A, J5:DiP, J5:OT, J5:OT-A, S1:DiP, S5:DiP, S5:OT, S5:OT-A                                                                                               |
| 326 | Yes         | 7       | 7-A  | 1000   | McF_6 | 0   | last   | wholeT_0.01 | J1:DiP, J1:OT, J1:OT-A, J5:DiP, J5:OT, J5:OT-A, S1:DiP, S5:DiP, S5:OT, S5:OT-A                                                                                               |
| 327 | Yes         | 7       | 7-A  | 1000   | McF_6 | 0   | last   | wholeT_0.5  | J1:DiP, J1:OT, J1:OT-A, J5:DiP, J5:OT, J5:OT-A, S1:DiP, S5:DiP, S5:OT, S5:OT-A                                                                                               |
| 328 | Yes         | 7       | 7-A  | 1000   | McF_6 | 0   | unif   | singleC     | none                                                                                                                                                                         |
| 329 | Yes         | 7       | 7-A  | 1000   | McF_6 | 0   | unif   | wholeT_0.01 | J1:CBN, J1:CBN-A, J1:DiP, J1:DiP-A, J1:OT, J1:OT-A, J5:CBN, J5:CBN-A, J5:DiP, J5:DiP-A, J5:OT, J5:OT-A, S5:CBN, S5:CBN-A, S5:DiP, S5:DiP-A, S5:OT, S5:OT-A                   |
| 330 | Yes         | 7       | 7-A  | 1000   | McF_6 | 0   | unif   | wholeT_0.5  | none                                                                                                                                                                         |
| 331 | Yes         | 7       | 7-A  | 1000   | McF_6 | Inf | last   | singleC     | J1:DiP, J1:DiP-A, J1:OT, J1:OT-A, J5:DiP, J5:DiP-A, J5:OT, J5:OT-A, S1:DiP, S1:DiP-A, S5:DiP, S5:DiP-A, S5:OT, S5:OT-A                                                       |
| 332 | Yes         | 7       | 7-A  | 1000   | McF_6 | Inf | last   | wholeT_0.01 | J1:DiP, J5:DiP, J5:OT, J5:OT-A, S1:DiP, S5:DiP, S5:OT, S5:OT-A                                                                                                               |
| 333 | Yes         | 7       | 7-A  | 1000   | McF_6 | Inf | last   | wholeT_0.5  | J1:DiP, J1:DiP-A, J1:OT, J1:OT-A, J5:DiP, J5:DiP-A, J5:OT, J5:OT-A, S1:DiP, S1:DiP-A, S5:DiP, S5:DiP-A, S5:OT, S5:OT-A                                                       |

Table 8: (continued)

|     | Conjunction | Drivers | Tree | S.Size | Model | sh  | S.Time | S.Type      | Best method(s)                                                                                                                                                                               |
|-----|-------------|---------|------|--------|-------|-----|--------|-------------|----------------------------------------------------------------------------------------------------------------------------------------------------------------------------------------------|
| 334 | Yes         | 7       | 7-A  | 1000   | McF_6 | Inf | unif   | singleC     | none                                                                                                                                                                                         |
| 335 | Yes         | 7       | 7-A  | 1000   | McF_6 | Inf | unif   | wholeT_0.01 | J1:CBN, J1:CBN-A, J1:DiP, J1:DiP-A, J1:OT, J1:OT-A, J5:CBN, J5:CBN-A, J5:DiP, J5:DiP-A, J5:OT, J5:OT-A, S5:CBN, S5:CBN-A, S5:DiP, S5:DiP-A, S5:OT, S5:OT-A                                   |
| 336 | Yes         | 7       | 7-A  | 1000   | McF_6 | Inf | unif   | wholeT_0.5  | none                                                                                                                                                                                         |
| 337 | Yes         | 7       | 7-A  | 200    | Bozic | 0   | last   | singleC     | J1:CBN, J1:CBN-A, J1:DiP, J1:DiP-A, J1:OT, J1:OT-A, J5:CBN, J5:CBN-A, J5:DiP, J5:DiP-A, J5:OT, J5:OT-A, S1:DiP, S1:DiP-A, S1:OT, S1:OT-A, S5:CBN, S5:DiP, S5:DiP-A, S5:OT, S5:OT-A           |
| 338 | Yes         | 7       | 7-A  | 200    | Bozic | 0   | last   | wholeT_0.01 | J1:CBN, J1:CBN-A, J1:DiP, J1:DiP-A, J1:OT, J1:OT-A, J5:CBN, J5:CBN-A, J5:DiP, J5:DiP-A, J5:OT, J5:OT-A, S1:DiP, S1:DiP-A, S5:CBN, S5:CBN-A, S5:DiP, S5:DiP-A, S5:OT, S5:OT-A                 |
| 339 | Yes         | 7       | 7-A  | 200    | Bozic | 0   | last   | wholeT_0.5  | J1:CBN, J1:CBN-A, J1:DiP, J1:DiP-A, J1:OT, J1:OT-A, J5:CBN, J5:CBN-A, J5:DiP, J5:DiP-A, J5:OT, J5:OT-A, S1:DiP, S1:DiP-A, S5:CBN, S5:CBN-A, S5:DiP, S5:DiP-A, S5:OT, S5:OT-A                 |
| 340 | Yes         | 7       | 7-A  | 200    | Bozic | 0   | unif   | singleC     | J1:CBN, J1:CBN-A, J1:DiP, J1:DiP-A, J1:OT, J1:OT-A, J5:CBN, J5:CBN-A, J5:DiP, J5:DiP-A, J5:OT, J5:OT-A, S1:DiP, S1:DiP-A, S1:OT, S1:OT-A, S5:CBN, S5:CBN-A, S5:DiP, S5:DiP-A, S5:OT, S5:OT-A |
| 341 | Yes         | 7       | 7-A  | 200    | Bozic | 0   | unif   | wholeT_0.01 | J5:CBN, J5:CBN-A, J5:DiP, J5:DiP-A, J5:OT, J5:OT-A                                                                                                                                           |
| 342 | Yes         | 7       | 7-A  | 200    | Bozic | 0   | unif   | wholeT_0.5  | none                                                                                                                                                                                         |
| 343 | Yes         | 7       | 7-A  | 200    | Bozic | Inf | last   | singleC     | J1:DiP, J1:DiP-A, J5:DiP, J5:DiP-A, J5:OT, J5:OT-A, S5:DiP, S5:DiP-A, S5:OT, S5:OT-A                                                                                                         |
| 344 | Yes         | 7       | 7-A  | 200    | Bozic | Inf | last   | wholeT_0.01 | J5:CBN-A, J5:DiP, J5:DiP-A, J5:OT                                                                                                                                                            |
| 345 | Yes         | 7       | 7-A  | 200    | Bozic | Inf | last   | wholeT_0.5  | J1:DiP, J1:DiP-A, J5:DiP, J5:DiP-A, J5:OT, J5:OT-A, S1:DiP, S1:DiP-A, S5:DiP, S5:DiP-A, S5:OT, S5:OT-A                                                                                       |

Table 8: (continued)

|     | Conjunction | Drivers | Tree | S.Size | Model | sh  | S.Time | S.Type      | Best method(s)                                                                                                                                                                                       |
|-----|-------------|---------|------|--------|-------|-----|--------|-------------|------------------------------------------------------------------------------------------------------------------------------------------------------------------------------------------------------|
| 346 | Yes         | 7       | 7-A  | 200    | Bozic | Inf | unif   | singleC     | J1:CBN, J1:CBN-A, J5:CBN, J5:CBN-A, J5:DiP, J5:DiP-A, J5:OT, J5:OT-A, S5:CBN, S5:CBN-A, S5:DiP, S5:DiP-A                                                                                             |
| 347 | Yes         | 7       | 7-A  | 200    | Bozic | Inf | unif   | wholeT_0.01 | J5:CBN, J5:CBN-A, S5:CBN, S5:CBN-A                                                                                                                                                                   |
| 348 | Yes         | 7       | 7-A  | 200    | Bozic | Inf | unif   | wholeT_0.5  | J1:CBN, J1:CBN-A, J5:CBN, J5:CBN-A, J5:DiP, J5:DiP-A, J5:OT, J5:OT-A, S5:CBN, S5:CBN-A, S5:DiP, S5:DiP-A, S5:OT, S5:OT-A                                                                             |
| 349 | Yes         | 7       | 7-A  | 200    | exp   | 0   | last   | singleC     | J1:CBN, J1:CBN-A, J1:DiP, J1:DiP-A, J1:OT, J1:OT-A, J5:CBN, J5:CBN-A, J5:DiP, J5:DiP-A, J5:OT, J5:OT-A, S1:DiP, S1:DiP-A, S1:OT, S1:OT-A, S5:CBN, S5:CBN-A, S5:DiP, S5:DiP-A, S5:OT, S5:OT-A         |
| 350 | Yes         | 7       | 7-A  | 200    | exp   | 0   | last   | wholeT_0.01 | J1:CBN, J1:CBN-A, J1:DiP, J1:DiP-A, J1:OT, J1:OT-A, J5:CBN, J5:CBN-A, J5:DiP, J5:DiP-A, J5:OT, J5:OT-A, S1:CBN, S1:CBN-A, S1:DiP, S1:DiP-A, S5:CBN, S5:DiP, S5:DiP-A                                 |
| 351 | Yes         | 7       | 7-A  | 200    | exp   | 0   | last   | wholeT_0.5  | J1:CBN, J1:CBN-A, J1:DiP, J1:DiP-A, J1:OT, J1:OT-A, J5:CBN, J5:CBN-A, J5:DiP, J5:DiP-A, J5:OT, J5:OT-A, S1:CBN, S1:DiP, S1:DiP-A, S1:OT, S1:OT-A, S5:CBN, S5:CBN-A, S5:DiP, S5:DiP-A, S5:OT, S5:OT-A |
| 352 | Yes         | 7       | 7-A  | 200    | exp   | 0   | unif   | singleC     | none                                                                                                                                                                                                 |
| 353 | Yes         | 7       | 7-A  | 200    | exp   | 0   | unif   | wholeT_0.01 | J1:CBN, J1:CBN-A, J1:DiP, J1:DiP-A, J1:OT, J1:OT-A, J5:CBN, J5:CBN-A, J5:DiP, J5:DiP-A, J5:OT, J5:OT-A, S1:DiP, S1:DiP-A, S5:CBN, S5:CBN-A, S5:DiP, S5:DiP-A, S5:OT, S5:OT-A                         |
| 354 | Yes         | 7       | 7-A  | 200    | exp   | 0   | unif   | wholeT_0.5  | none                                                                                                                                                                                                 |
| 355 | Yes         | 7       | 7-A  | 200    | exp   | Inf | last   | singleC     | J1:DiP, J1:DiP-A, J1:OT, J1:OT-A, J5:CBN, J5:CBN-A, J5:DiP, J5:DiP-A, J5:OT, J5:OT-A, S1:DiP, S1:DiP-A, S5:DiP, S5:DiP-A, S5:OT, S5:OT-A                                                             |
| 356 | Yes         | 7       | 7-A  | 200    | exp   | Inf | last   | wholeT_0.01 | J1:DiP, J5:CBN, J5:CBN-A, J5:DiP, J5:DiP-A, J5:OT, J5:OT-A, S1:DiP, S5:CBN-A, S5:DiP, S5:DiP-A                                                                                                       |

Table 8: (continued)

|     | Conjunction | Drivers | Tree | S.Size | Model | sh  | S.Time | S.Type      | Best method(s)                                                                                                                                                                         |
|-----|-------------|---------|------|--------|-------|-----|--------|-------------|----------------------------------------------------------------------------------------------------------------------------------------------------------------------------------------|
| 357 | Yes         | 7       | 7-A  | 200    | exp   | Inf | last   | wholeT_0.5  | J1:DiP, J1:DiP-A, J1:OT, J1:OT-A, J5:CBN, J5:CBN-A, J5:DiP, J5:DiP-A, J5:OT, J5:OT-A, S1:DiP, S1:DiP-A, S5:DiP, S5:DiP-A, S5:OT, S5:OT-A                                               |
| 358 | Yes         | 7       | 7-A  | 200    | exp   | Inf | unif   | singleC     | J1:CBN, J1:CBN-A, J1:DiP, J1:DiP-A, J1:OT, J1:OT-A, J5:CBN, J5:CBN-A, J5:DiP, J5:DiP-A, J5:OT, J5:OT-A, S1:CBN-A, S1:DiP, S1:DiP-A, S5:CBN, S5:CBN-A, S5:DiP, S5:DiP-A, S5:OT, S5:OT-A |
| 359 | Yes         | 7       | 7-A  | 200    | exp   | Inf | unif   | wholeT_0.01 | J5:CBN, J5:CBN-A, J5:DiP-A, J5:OT, J5:OT-A, S5:CBN, S5:CBN-A                                                                                                                           |
| 360 | Yes         | 7       | 7-A  | 200    | exp   | Inf | unif   | wholeT_0.5  | J1:CBN, J1:CBN-A, J1:DiP, J1:DiP-A, J1:OT, J1:OT-A, J5:CBN, J5:CBN-A, J5:DiP, J5:DiP-A, J5:OT, J5:OT-A, S1:CBN-A, S1:DiP, S1:DiP-A, S5:CBN, S5:CBN-A, S5:DiP, S5:DiP-A, S5:OT, S5:OT-A |
| 361 | Yes         | 7       | 7-A  | 200    | McF_4 | 0   | last   | singleC     | J1:DiP, J1:DiP-A, J1:OT, J1:OT-A, J5:DiP, J5:DiP-A, J5:OT, J5:OT-A, S5:DiP, S5:DiP-A, S5:OT, S5:OT-A                                                                                   |
| 362 | Yes         | 7       | 7-A  | 200    | McF_4 | 0   | last   | wholeT_0.01 | J1:DiP, J1:DiP-A, J5:DiP, J5:DiP-A, J5:OT, J5:OT-A, S1:DiP, S1:DiP-A, S5:DiP, S5:DiP-A, S5:OT, S5:OT-A                                                                                 |
| 363 | Yes         | 7       | 7-A  | 200    | McF_4 | 0   | last   | wholeT_0.5  | J1:DiP, J1:DiP-A, J1:OT, J1:OT-A, J5:DiP, J5:DiP-A, J5:OT, J5:OT-A, S1:DiP, S1:DiP-A, S5:DiP, S5:DiP-A, S5:OT, S5:OT-A                                                                 |
| 364 | Yes         | 7       | 7-A  | 200    | McF_4 | 0   | unif   | singleC     | J1:CBN, J1:CBN-A, J1:DiP, J1:DiP-A, J1:OT, J1:OT-A, J5:CBN, J5:CBN-A, J5:DiP, J5:DiP-A, J5:OT, J5:OT-A, S1:DiP, S1:DiP-A, S5:CBN, S5:CBN-A, S5:DiP, S5:DiP-A, S5:OT, S5:OT-A           |
| 365 | Yes         | 7       | 7-A  | 200    | McF_4 | 0   | unif   | wholeT_0.01 | J1:CBN, J1:CBN-A, J1:DiP, J1:DiP-A, J1:OT, J1:OT-A, J5:CBN, J5:CBN-A, J5:DiP, J5:DiP-A, J5:OT, J5:OT-A, S1:DiP, S1:DiP-A, S5:CBN, S5:CBN-A, S5:DiP, S5:DiP-A, S5:OT, S5:OT-A           |

Table 8: (continued)

|     | Conjunction | Drivers | Tree | S.Size | Model | sh  | S.Time | S.Type      | Best method(s)                                                                                                                                                               |
|-----|-------------|---------|------|--------|-------|-----|--------|-------------|------------------------------------------------------------------------------------------------------------------------------------------------------------------------------|
| 366 | Yes         | 7       | 7-A  | 200    | McF_4 | 0   | unif   | wholeT_0.5  | J1:CBN, J1:CBN-A, J1:DiP, J1:DiP-A, J1:OT, J1:OT-A, J5:CBN, J5:CBN-A, J5:DiP, J5:DiP-A, J5:OT, J5:OT-A, S1:DiP, S1:DiP-A, S5:CBN, S5:CBN-A, S5:DiP, S5:DiP-A, S5:OT, S5:OT-A |
| 367 | Yes         | 7       | 7-A  | 200    | McF_4 | Inf | last   | singleC     | J1:DiP, J1:DiP-A, J1:OT, J1:OT-A, J5:DiP, J5:DiP-A, J5:OT, J5:OT-A, S1:DiP, S1:DiP-A, S5:DiP, S5:DiP-A, S5:OT, S5:OT-A                                                       |
| 368 | Yes         | 7       | 7-A  | 200    | McF_4 | Inf | last   | wholeT_0.01 | J1:DiP, J1:DiP-A, J5:DiP, J5:DiP-A, J5:OT, J5:OT-A, S1:DiP, S1:DiP-A, S5:DiP, S5:DiP-A, S5:OT, S5:OT-A                                                                       |
| 369 | Yes         | 7       | 7-A  | 200    | McF_4 | Inf | last   | wholeT_0.5  | J1:DiP, J1:DiP-A, J1:OT, J1:OT-A, J5:DiP, J5:DiP-A, J5:OT, J5:OT-A, S1:DiP, S1:DiP-A, S5:DiP, S5:DiP-A, S5:OT, S5:OT-A                                                       |
| 370 | Yes         | 7       | 7-A  | 200    | McF_4 | Inf | unif   | singleC     | J1:CBN, J1:CBN-A, J1:DiP, J1:DiP-A, J1:OT, J1:OT-A, J5:CBN, J5:CBN-A, J5:DiP, J5:DiP-A, J5:OT, J5:OT-A, S1:DiP, S1:DiP-A, S5:CBN, S5:CBN-A, S5:DiP, S5:DiP-A, S5:OT, S5:OT-A |
| 371 | Yes         | 7       | 7-A  | 200    | McF_4 | Inf | unif   | wholeT_0.01 | J1:CBN, J1:CBN-A, J1:DiP, J1:DiP-A, J1:OT, J1:OT-A, J5:CBN, J5:CBN-A, J5:DiP, J5:DiP-A, J5:OT, J5:OT-A, S1:DiP, S1:DiP-A, S5:CBN, S5:CBN-A, S5:DiP, S5:DiP-A, S5:OT, S5:OT-A |
| 372 | Yes         | 7       | 7-A  | 200    | McF_4 | Inf | unif   | wholeT_0.5  | J1:CBN, J1:CBN-A, J1:DiP, J1:DiP-A, J1:OT, J1:OT-A, J5:CBN, J5:CBN-A, J5:DiP, J5:DiP-A, J5:OT, J5:OT-A, S1:DiP, S1:DiP-A, S5:CBN, S5:CBN-A, S5:DiP, S5:DiP-A, S5:OT, S5:OT-A |
| 373 | Yes         | 7       | 7-A  | 200    | McF_6 | 0   | last   | singleC     | J1:DiP, J1:OT, J1:OT-A, J5:DiP, J5:OT, J5:OT-A, S1:DiP, S5:DiP, S5:OT, S5:OT-A                                                                                               |
| 374 | Yes         | 7       | 7-A  | 200    | McF_6 | 0   | last   | wholeT_0.01 | J1:DiP, J5:DiP, J5:OT, J5:OT-A, S1:DiP, S5:DiP, S5:OT, S5:OT-A                                                                                                               |
| 375 | Yes         | 7       | 7-A  | 200    | McF_6 | 0   | last   | wholeT_0.5  | J1:DiP, J1:OT, J1:OT-A, J5:DiP, J5:OT, J5:OT-A, S1:DiP, S5:DiP, S5:OT, S5:OT-A                                                                                               |

Table 8: (continued)

|     | Conjunction | Drivers | Tree | S.Size | Model | sh  | S.Time | S.Type      | Best method(s)                                                                                                                                                               |
|-----|-------------|---------|------|--------|-------|-----|--------|-------------|------------------------------------------------------------------------------------------------------------------------------------------------------------------------------|
| 376 | Yes         | 7       | 7-A  | 200    | McF_6 | 0   | unif   | singleC     | J1:CBN, J1:CBN-A, J1:DiP, J1:DiP-A, J5:CBN, J5:CBN-A, J5:DiP, J5:DiP-A, S1:DiP, S1:DiP-A, S5:CBN, S5:CBN-A, S5:DiP, S5:DiP-A                                                 |
| 377 | Yes         | 7       | 7-A  | 200    | McF_6 | 0   | unif   | wholeT_0.01 | J1:CBN, J1:CBN-A, J1:DiP, J1:DiP-A, J1:OT, J1:OT-A, J5:CBN, J5:CBN-A, J5:DiP, J5:DiP-A, J5:OT, J5:OT-A, S1:DiP, S1:DiP-A, S5:CBN, S5:CBN-A, S5:DiP, S5:DiP-A, S5:OT, S5:OT-A |
| 378 | Yes         | 7       | 7-A  | 200    | McF_6 | 0   | unif   | wholeT_0.5  | J1:CBN, J1:CBN-A, J1:DiP, J1:DiP-A, J5:CBN, J5:CBN-A, J5:DiP, J5:DiP-A, S1:DiP, S1:DiP-A, S5:CBN, S5:CBN-A, S5:DiP, S5:DiP-A                                                 |
| 379 | Yes         | 7       | 7-A  | 200    | McF_6 | Inf | last   | singleC     | J1:DiP, J1:DiP-A, J5:DiP, J5:DiP-A, J5:OT, J5:OT-A, S1:DiP, S5:DiP, S5:DiP-A, S5:OT, S5:OT-A                                                                                 |
| 380 | Yes         | 7       | 7-A  | 200    | McF_6 | Inf | last   | wholeT_0.01 | J1:DiP, J5:DiP, J5:OT, J5:OT-A, S1:DiP, S5:DiP, S5:OT, S5:OT-A                                                                                                               |
| 381 | Yes         | 7       | 7-A  | 200    | McF_6 | Inf | last   | wholeT_0.5  | J1:DiP, J1:DiP-A, J1:OT, J1:OT-A, J5:DiP, J5:DiP-A, J5:OT, J5:OT-A, S1:DiP, S5:DiP, S5:DiP-A, S5:OT, S5:OT-A                                                                 |
| 382 | Yes         | 7       | 7-A  | 200    | McF_6 | Inf | unif   | singleC     | J1:CBN, J1:CBN-A, J1:DiP, J1:DiP-A, J5:CBN, J5:CBN-A, J5:DiP, J5:DiP-A, S1:DiP, S1:DiP-A, S5:CBN, S5:CBN-A, S5:DiP, S5:DiP-A                                                 |
| 383 | Yes         | 7       | 7-A  | 200    | McF_6 | Inf | unif   | wholeT_0.01 | J1:CBN, J1:CBN-A, J1:DiP, J1:DiP-A, J5:CBN, J5:CBN-A, J5:DiP, J5:DiP-A, S1:DiP, S1:DiP-A, S5:CBN, S5:CBN-A, S5:DiP, S5:DiP-A                                                 |
| 384 | Yes         | 7       | 7-A  | 200    | McF_6 | Inf | unif   | wholeT_0.5  | J1:CBN, J1:CBN-A, J1:DiP, J1:DiP-A, J5:CBN, J5:CBN-A, J5:DiP, J5:DiP-A, S1:DiP, S1:DiP-A, S5:CBN, S5:CBN-A, S5:DiP, S5:DiP-A                                                 |
| 385 | Yes         | 7       | 7-A  | 100    | Bozic | 0   | last   | singleC     | J1:DiP, J1:DiP-A, J5:CBN, J5:CBN-A, J5:DiP, J5:DiP-A, J5:OT, J5:OT-A, S1:DiP, S1:DiP-A, S5:CBN, S5:DiP, S5:DiP-A, S5:OT, S5:OT-A                                             |

Table 8: (continued)

|     | Conjunction | Drivers | Tree | S.Size | Model | sh  | S.Time | S.Type      | Best method(s)                                                                                                                                                               |
|-----|-------------|---------|------|--------|-------|-----|--------|-------------|------------------------------------------------------------------------------------------------------------------------------------------------------------------------------|
| 386 | Yes         | 7       | 7-A  | 100    | Bozic | 0   | last   | wholeT_0.01 | J1:DiP, J1:DiP-A, J5:CBN, J5:CBN-A, J5:DiP, J5:DiP-A, J5:OT, J5:OT-A, S1:DiP, S1:DiP-A, S5:CBN, S5:CBN-A, S5:DiP, S5:DiP-A, S5:OT, S5:OT-A                                   |
| 387 | Yes         | 7       | 7-A  | 100    | Bozic | 0   | last   | wholeT_0.5  | J1:CBN, J1:CBN-A, J1:DiP, J1:DiP-A, J5:CBN, J5:CBN-A, J5:DiP, J5:DiP-A, J5:OT, J5:OT-A, S1:DiP, S1:DiP-A, S5:CBN, S5:CBN-A, S5:DiP, S5:DiP-A, S5:OT, S5:OT-A                 |
| 388 | Yes         | 7       | 7-A  | 100    | Bozic | 0   | unif   | singleC     | J1:CBN, J1:CBN-A, J1:DiP, J1:DiP-A, J1:OT, J1:OT-A, J5:CBN, J5:CBN-A, J5:DiP, J5:DiP-A, J5:OT, J5:OT-A, S1:DiP, S1:DiP-A, S5:CBN, S5:CBN-A, S5:DiP, S5:DiP-A, S5:OT, S5:OT-A |
| 389 | Yes         | 7       | 7-A  | 100    | Bozic | 0   | unif   | wholeT_0.01 | J5:CBN, J5:CBN-A, J5:DiP, J5:DiP-A, J5:OT, J5:OT-A                                                                                                                           |
| 390 | Yes         | 7       | 7-A  | 100    | Bozic | 0   | unif   | wholeT_0.5  | J1:CBN, J1:CBN-A, J1:DiP, J1:DiP-A, J1:OT, J1:OT-A, J5:CBN, J5:CBN-A, J5:DiP, J5:DiP-A, J5:OT, J5:OT-A, S1:DiP, S1:DiP-A, S5:CBN, S5:CBN-A, S5:DiP, S5:DiP-A, S5:OT, S5:OT-A |
| 391 | Yes         | 7       | 7-A  | 100    | Bozic | Inf | last   | singleC     | J1:DiP, J1:DiP-A, J5:DiP, J5:DiP-A, J5:OT, J5:OT-A, S1:DiP, S1:DiP-A, S5:DiP, S5:DiP-A                                                                                       |
| 392 | Yes         | 7       | 7-A  | 100    | Bozic | Inf | last   | wholeT_0.01 | J5:CBN, J5:DiP, J5:DiP-A                                                                                                                                                     |
| 393 | Yes         | 7       | 7-A  | 100    | Bozic | Inf | last   | wholeT_0.5  | J1:DiP, J1:DiP-A, J5:DiP, J5:DiP-A, J5:OT, J5:OT-A, S1:DiP, S1:DiP-A, S5:DiP, S5:DiP-A                                                                                       |
| 394 | Yes         | 7       | 7-A  | 100    | Bozic | Inf | unif   | singleC     | J5:CBN, J5:CBN-A, J5:DiP, J5:DiP-A, J5:OT, J5:OT-A, S5:CBN, S5:CBN-A, S5:DiP, S5:DiP-A                                                                                       |
| 395 | Yes         | 7       | 7-A  | 100    | Bozic | Inf | unif   | wholeT_0.01 | J5:CBN, J5:CBN-A, J5:OT, J5:OT-A, S5:CBN, S5:CBN-A                                                                                                                           |
| 396 | Yes         | 7       | 7-A  | 100    | Bozic | Inf | unif   | wholeT_0.5  | J5:CBN, J5:CBN-A, J5:DiP, J5:DiP-A, J5:OT, J5:OT-A, S5:CBN, S5:CBN-A, S5:DiP, S5:DiP-A                                                                                       |

Table 8: (continued)

|     | Conjunction | Drivers | Tree | S.Size | Model | sh  | S.Time | S.Type      | Best method(s)                                                                                                                                                                               |
|-----|-------------|---------|------|--------|-------|-----|--------|-------------|----------------------------------------------------------------------------------------------------------------------------------------------------------------------------------------------|
| 397 | Yes         | 7       | 7-A  | 100    | exp   | 0   | last   | singleC     | J1:CBN, J1:CBN-A, J1:DiP, J1:DiP-A, J1:OT, J1:OT-A, J5:CBN, J5:CBN-A, J5:DiP, J5:DiP-A, J5:OT, J5:OT-A, S1:DiP, S1:DiP-A, S1:OT, S1:OT-A, S5:CBN, S5:CBN-A, S5:DiP, S5:DiP-A, S5:OT, S5:OT-A |
| 398 | Yes         | 7       | 7-A  | 100    | exp   | 0   | last   | wholeT_0.01 | J1:CBN, J1:CBN-A, J1:DiP, J1:DiP-A, J5:CBN, J5:CBN-A, J5:DiP, J5:DiP-A, J5:OT, J5:OT-A, S1:DiP, S1:DiP-A, S5:CBN, S5:DiP, S5:DiP-A                                                           |
| 399 | Yes         | 7       | 7-A  | 100    | exp   | 0   | last   | wholeT_0.5  | J1:CBN, J1:CBN-A, J1:DiP, J1:DiP-A, J1:OT, J1:OT-A, J5:CBN, J5:CBN-A, J5:DiP, J5:DiP-A, J5:OT, J5:OT-A, S1:DiP, S1:DiP-A, S1:OT, S1:OT-A, S5:CBN, S5:CBN-A, S5:DiP, S5:DiP-A, S5:OT, S5:OT-A |
| 400 | Yes         | 7       | 7-A  | 100    | exp   | 0   | unif   | singleC     | none                                                                                                                                                                                         |
| 401 | Yes         | 7       | 7-A  | 100    | exp   | 0   | unif   | wholeT_0.01 | J1:DiP, J1:DiP-A, J5:CBN, J5:CBN-A, J5:DiP, J5:DiP-A, J5:OT, J5:OT-A, S1:DiP, S1:DiP-A, S5:CBN, S5:CBN-A, S5:DiP, S5:DiP-A, S5:OT, S5:OT-A                                                   |
| 402 | Yes         | 7       | 7-A  | 100    | exp   | 0   | unif   | wholeT_0.5  | none                                                                                                                                                                                         |
| 403 | Yes         | 7       | 7-A  | 100    | exp   | Inf | last   | singleC     | J1:DiP, J1:DiP-A, J1:OT, J1:OT-A, J5:CBN, J5:CBN-A, J5:DiP, J5:DiP-A, J5:OT, J5:OT-A, S1:DiP, S1:DiP-A, S5:DiP, S5:DiP-A, S5:OT, S5:OT-A                                                     |
| 404 | Yes         | 7       | 7-A  | 100    | exp   | Inf | last   | wholeT_0.01 | J5:DiP, J5:DiP-A, S5:DiP                                                                                                                                                                     |
| 405 | Yes         | 7       | 7-A  | 100    | exp   | Inf | last   | wholeT_0.5  | J1:CBN, J1:DiP, J1:DiP-A, J1:OT, J1:OT-A, J5:CBN, J5:CBN-A, J5:DiP, J5:DiP-A, J5:OT, J5:OT-A, S1:DiP, S1:DiP-A, S5:DiP, S5:DiP-A, S5:OT, S5:OT-A                                             |
| 406 | Yes         | 7       | 7-A  | 100    | exp   | Inf | unif   | singleC     | J1:DiP, J1:DiP-A, J5:CBN, J5:CBN-A, J5:DiP, J5:DiP-A, J5:OT, J5:OT-A, S1:DiP, S1:DiP-A, S5:CBN, S5:CBN-A, S5:DiP, S5:DiP-A, S5:OT, S5:OT-A                                                   |
| 407 | Yes         | 7       | 7-A  | 100    | exp   | Inf | unif   | wholeT_0.01 | J5:CBN, J5:CBN-A, J5:OT, J5:OT-A, S5:CBN, S5:CBN-A, S5:OT, S5:OT-A                                                                                                                           |



Table 8: (continued)

|     | Conjunction | Drivers | Tree | S.Size | Model | sh  | S.Time | S.Type      | Best method(s)                                                                                                                                                               |
|-----|-------------|---------|------|--------|-------|-----|--------|-------------|------------------------------------------------------------------------------------------------------------------------------------------------------------------------------|
| 408 | Yes         | 7       | 7-A  | 100    | exp   | Inf | unif   | wholeT_0.5  | J1:CBN-A, J1:DiP, J1:DiP-A, J5:CBN, J5:CBN-A, J5:DiP, J5:DiP-A, J5:OT, J5:OT-A, S1:DiP, S1:DiP-A, S5:CBN, S5:CBN-A, S5:DiP, S5:DiP-A, S5:OT, S5:OT-A                         |
| 409 | Yes         | 7       | 7-A  | 100    | McF_4 | 0   | last   | singleC     | J1:DiP, J1:DiP-A, J1:OT, J1:OT-A, J5:DiP, J5:DiP-A, J5:OT, J5:OT-A, S1:DiP, S1:DiP-A, S5:DiP, S5:DiP-A, S5:OT, S5:OT-A                                                       |
| 410 | Yes         | 7       | 7-A  | 100    | McF_4 | 0   | last   | wholeT_0.01 | J1:DiP, J1:DiP-A, J5:DiP, J5:DiP-A, J5:OT, J5:OT-A, S5:DiP, S5:DiP-A, S5:OT, S5:OT-A                                                                                         |
| 411 | Yes         | 7       | 7-A  | 100    | McF_4 | 0   | last   | wholeT_0.5  | J1:DiP, J1:DiP-A, J1:OT, J1:OT-A, J5:DiP, J5:DiP-A, J5:OT, J5:OT-A, S1:DiP, S1:DiP-A, S5:DiP, S5:DiP-A, S5:OT, S5:OT-A                                                       |
| 412 | Yes         | 7       | 7-A  | 100    | McF_4 | 0   | unif   | singleC     | J1:CBN, J1:CBN-A, J1:DiP, J1:DiP-A, J1:OT, J1:OT-A, J5:CBN, J5:CBN-A, J5:DiP, J5:DiP-A, J5:OT, J5:OT-A, S1:DiP, S1:DiP-A, S5:CBN, S5:CBN-A, S5:DiP, S5:DiP-A, S5:OT, S5:OT-A |
| 413 | Yes         | 7       | 7-A  | 100    | McF_4 | 0   | unif   | wholeT_0.01 | J1:DiP, J1:DiP-A, J5:CBN, J5:CBN-A, J5:DiP, J5:DiP-A, J5:OT, J5:OT-A, S5:CBN, S5:CBN-A, S5:DiP, S5:DiP-A, S5:OT, S5:OT-A                                                     |
| 414 | Yes         | 7       | 7-A  | 100    | McF_4 | 0   | unif   | wholeT_0.5  | J1:CBN, J1:CBN-A, J1:DiP, J1:DiP-A, J1:OT, J1:OT-A, J5:CBN, J5:CBN-A, J5:DiP, J5:DiP-A, J5:OT, J5:OT-A, S1:DiP, S1:DiP-A, S5:CBN, S5:CBN-A, S5:DiP, S5:DiP-A, S5:OT, S5:OT-A |
| 415 | Yes         | 7       | 7-A  | 100    | McF_4 | Inf | last   | singleC     | J1:DiP, J1:DiP-A, J1:OT, J1:OT-A, J5:DiP, J5:DiP-A, J5:OT, J5:OT-A, S1:DiP, S1:DiP-A, S5:DiP, S5:DiP-A, S5:OT, S5:OT-A                                                       |
| 416 | Yes         | 7       | 7-A  | 100    | McF_4 | Inf | last   | wholeT_0.01 | J1:DiP, J1:DiP-A, J5:DiP, J5:DiP-A, J5:OT, J5:OT-A, S1:DiP, S1:DiP-A, S5:DiP, S5:DiP-A, S5:OT, S5:OT-A                                                                       |
| 417 | Yes         | 7       | 7-A  | 100    | McF_4 | Inf | last   | wholeT_0.5  | J1:DiP, J1:DiP-A, J5:DiP, J5:DiP-A, J5:OT, J5:OT-A, S1:DiP, S1:DiP-A, S5:DiP, S5:DiP-A, S5:OT, S5:OT-A                                                                       |

Table 8: (continued)

|     | Conjunction | Drivers | Tree | S.Size | Model | sh  | S.Time | S.Type      | Best method(s)                                                                                                                                                               |
|-----|-------------|---------|------|--------|-------|-----|--------|-------------|------------------------------------------------------------------------------------------------------------------------------------------------------------------------------|
| 418 | Yes         | 7       | 7-A  | 100    | McF_4 | Inf | unif   | singleC     | J1:CBN, J1:CBN-A, J1:DiP, J1:DiP-A, J1:OT, J1:OT-A, J5:CBN, J5:CBN-A, J5:DiP, J5:DiP-A, J5:OT, J5:OT-A, S1:DiP, S1:DiP-A, S5:CBN, S5:CBN-A, S5:DiP, S5:DiP-A, S5:OT, S5:OT-A |
| 419 | Yes         | 7       | 7-A  | 100    | McF_4 | Inf | unif   | wholeT_0.01 | J1:CBN, J1:CBN-A, J1:DiP, J1:DiP-A, J5:CBN, J5:CBN-A, J5:DiP, J5:DiP-A, J5:OT, J5:OT-A, S5:CBN, S5:CBN-A, S5:DiP, S5:DiP-A, S5:OT, S5:OT-A                                   |
| 420 | Yes         | 7       | 7-A  | 100    | McF_4 | Inf | unif   | wholeT_0.5  | J1:CBN, J1:CBN-A, J1:DiP, J1:DiP-A, J1:OT, J1:OT-A, J5:CBN, J5:CBN-A, J5:DiP, J5:DiP-A, J5:OT, J5:OT-A, S1:DiP, S1:DiP-A, S5:CBN, S5:CBN-A, S5:DiP, S5:DiP-A, S5:OT, S5:OT-A |
| 421 | Yes         | 7       | 7-A  | 100    | McF_6 | 0   | last   | singleC     | J1:DiP, J1:DiP-A, J5:DiP, J5:DiP-A, J5:OT, J5:OT-A, S1:DiP, S1:DiP-A, S5:DiP, S5:DiP-A, S5:OT, S5:OT-A                                                                       |
| 422 | Yes         | 7       | 7-A  | 100    | McF_6 | 0   | last   | wholeT_0.01 | J1:DiP, J5:DiP, J5:OT, J5:OT-A, S1:DiP, S5:DiP, S5:OT, S5:OT-A                                                                                                               |
| 423 | Yes         | 7       | 7-A  | 100    | McF_6 | 0   | last   | wholeT_0.5  | J1:DiP, J5:DiP, J5:DiP-A, J5:OT, J5:OT-A, S1:DiP, S5:DiP, S5:DiP-A, S5:OT, S5:OT-A                                                                                           |
| 424 | Yes         | 7       | 7-A  | 100    | McF_6 | 0   | unif   | singleC     | J1:CBN, J1:CBN-A, J1:DiP, J1:DiP-A, J5:CBN, J5:CBN-A, J5:DiP, J5:DiP-A, S1:DiP, S1:DiP-A, S5:CBN, S5:CBN-A, S5:DiP, S5:DiP-A                                                 |
| 425 | Yes         | 7       | 7-A  | 100    | McF_6 | 0   | unif   | wholeT_0.01 | J1:DiP, J5:CBN, J5:CBN-A, J5:DiP, J5:DiP-A, S5:CBN, S5:CBN-A, S5:DiP, S5:DiP-A                                                                                               |
| 426 | Yes         | 7       | 7-A  | 100    | McF_6 | 0   | unif   | wholeT_0.5  | J1:CBN, J1:CBN-A, J1:DiP, J1:DiP-A, J5:CBN, J5:CBN-A, J5:DiP, J5:DiP-A, S1:DiP, S1:DiP-A, S5:CBN, S5:CBN-A, S5:DiP, S5:DiP-A                                                 |
| 427 | Yes         | 7       | 7-A  | 100    | McF_6 | Inf | last   | singleC     | J1:DiP, J1:DiP-A, J5:DiP, J5:DiP-A, J5:OT, J5:OT-A, S1:DiP, S1:DiP-A, S5:DiP, S5:DiP-A, S5:OT, S5:OT-A                                                                       |
| 428 | Yes         | 7       | 7-A  | 100    | McF_6 | Inf | last   | wholeT_0.01 | J5:DiP, J5:OT, J5:OT-A, S1:DiP, S5:DiP, S5:OT, S5:OT-A                                                                                                                       |

Table 8: (continued)

|     | Conjunction | Drivers | Tree | S.Size | Model | sh  | S.Time | S.Type      | Best method(s)                                                                                                                                                             |
|-----|-------------|---------|------|--------|-------|-----|--------|-------------|----------------------------------------------------------------------------------------------------------------------------------------------------------------------------|
| 429 | Yes         | 7       | 7-A  | 100    | McF_6 | Inf | last   | wholeT_0.5  | J1:DiP, J1:DiP-A, J5:DiP, J5:DiP-A, J5:OT, J5:OT-A, S1:DiP, S1:DiP-A, S5:DiP, S5:DiP-A, S5:OT, S5:OT-A                                                                     |
| 430 | Yes         | 7       | 7-A  | 100    | McF_6 | Inf | unif   | singleC     | J1:DiP, J1:DiP-A, J5:CBN, J5:CBN-A, J5:DiP, J5:DiP-A, S1:DiP, S1:DiP-A, S5:CBN, S5:CBN-A, S5:DiP, S5:DiP-A                                                                 |
| 431 | Yes         | 7       | 7-A  | 100    | McF_6 | Inf | unif   | wholeT_0.01 | J1:DiP, J1:DiP-A, J5:CBN, J5:CBN-A, J5:DiP, J5:DiP-A, S5:CBN, S5:CBN-A, S5:DiP, S5:DiP-A                                                                                   |
| 432 | Yes         | 7       | 7-A  | 100    | McF_6 | Inf | unif   | wholeT_0.5  | J1:CBN, J1:CBN-A, J1:DiP, J1:DiP-A, J5:CBN, J5:CBN-A, J5:DiP, J5:DiP-A, S1:DiP, S1:DiP-A, S5:CBN, S5:CBN-A, S5:DiP, S5:DiP-A                                               |
| 433 | No          | 11      | 11-B | 1000   | Bozic | 0   | last   | singleC     | J1:DiP, J1:DiP-A, J1:OT, J1:OT-A, J5:DiP, J5:DiP-A, J5:OT, J5:OT-A, S1:OT, S1:OT-A, S5:DiP, S5:DiP-A, S5:OT, S5:OT-A                                                       |
| 434 | No          | 11      | 11-B | 1000   | Bozic | 0   | last   | wholeT_0.01 | J1:DiP, J1:DiP-A, J5:DiP, J5:DiP-A, S1:DiP, S1:DiP-A, S5:DiP, S5:DiP-A                                                                                                     |
| 435 | No          | 11      | 11-B | 1000   | Bozic | 0   | last   | wholeT_0.5  | J1:DiP, J1:DiP-A, J1:OT, J1:OT-A, J5:DiP, J5:DiP-A, J5:OT, J5:OT-A, S1:OT, S1:OT-A, S5:DiP, S5:DiP-A, S5:OT, S5:OT-A                                                       |
| 436 | No          | 11      | 11-B | 1000   | Bozic | 0   | unif   | singleC     | J1:DiP, J1:DiP-A, J1:OT, J1:OT-A, J5:CBN, J5:CBN-A, J5:DiP, J5:DiP-A, J5:OT, J5:OT-A, S1:DiP, S1:DiP-A, S1:OT, S1:OT-A, S5:DiP, S5:DiP-A, S5:OT, S5:OT-A                   |
| 437 | No          | 11      | 11-B | 1000   | Bozic | 0   | unif   | wholeT_0.01 | J5:DiP, J5:DiP-A, J5:OT, J5:OT-A, S5:OT, S5:OT-A                                                                                                                           |
| 438 | No          | 11      | 11-B | 1000   | Bozic | 0   | unif   | wholeT_0.5  | J1:CBN, J1:CBN-A, J1:DiP, J1:DiP-A, J1:OT, J1:OT-A, J5:CBN, J5:CBN-A, J5:DiP, J5:DiP-A, J5:OT, J5:OT-A, S1:DiP, S1:DiP-A, S1:OT, S1:OT-A, S5:DiP, S5:DiP-A, S5:OT, S5:OT-A |
| 439 | No          | 11      | 11-B | 1000   | Bozic | Inf | last   | singleC     | J1:DiP, J1:DiP-A, J1:OT, J1:OT-A, J5:DiP, J5:DiP-A, J5:OT, J5:OT-A, S5:DiP, S5:DiP-A, S5:OT, S5:OT-A                                                                       |
| 440 | No          | 11      | 11-B | 1000   | Bozic | Inf | last   | wholeT_0.01 | J5:DiP, J5:DiP-A, J5:OT, J5:OT-A                                                                                                                                           |

Table 8: (continued)

|     | Conjunction | Drivers | Tree | S.Size | Model | sh  | S.Time | S.Type      | Best method(s)                                                                                                                                                             |
|-----|-------------|---------|------|--------|-------|-----|--------|-------------|----------------------------------------------------------------------------------------------------------------------------------------------------------------------------|
| 441 | No          | 11      | 11-B | 1000   | Bozic | Inf | last   | wholeT_0.5  | J1:DiP, J1:DiP-A, J1:OT, J1:OT-A, J5:DiP, J5:DiP-A, J5:OT, J5:OT-A, S5:DiP, S5:DiP-A, S5:OT, S5:OT-A                                                                       |
| 442 | No          | 11      | 11-B | 1000   | Bozic | Inf | unif   | singleC     | J1:DiP, J1:DiP-A, J1:OT, J1:OT-A, J5:DiP, J5:DiP-A, J5:OT, J5:OT-A, S5:DiP, S5:DiP-A, S5:OT, S5:OT-A                                                                       |
| 443 | No          | 11      | 11-B | 1000   | Bozic | Inf | unif   | wholeT_0.01 | J5:DiP, J5:DiP-A, J5:OT, J5:OT-A                                                                                                                                           |
| 444 | No          | 11      | 11-B | 1000   | Bozic | Inf | unif   | wholeT_0.5  | J1:DiP, J1:DiP-A, J1:OT, J1:OT-A, J5:DiP, J5:DiP-A, J5:OT, J5:OT-A, S5:DiP, S5:DiP-A, S5:OT, S5:OT-A                                                                       |
| 445 | No          | 11      | 11-B | 1000   | exp   | 0   | last   | singleC     | J1:DiP, J1:DiP-A, J1:OT, J1:OT-A, J5:CBN, J5:CBN-A, J5:DiP, J5:DiP-A, J5:OT, J5:OT-A, S1:DiP, S1:DiP-A, S1:OT, S1:OT-A, S5:DiP, S5:DiP-A, S5:OT, S5:OT-A                   |
| 446 | No          | 11      | 11-B | 1000   | exp   | 0   | last   | wholeT_0.01 | J1:DiP, J1:DiP-A, J1:OT, J1:OT-A, J5:DiP, J5:DiP-A, J5:OT, J5:OT-A, S1:DiP-A, S1:OT, S1:OT-A, S5:DiP, S5:DiP-A, S5:OT, S5:OT-A                                             |
| 447 | No          | 11      | 11-B | 1000   | exp   | 0   | last   | wholeT_0.5  | J1:DiP, J1:DiP-A, J1:OT, J1:OT-A, J5:CBN, J5:CBN-A, J5:DiP, J5:DiP-A, J5:OT, J5:OT-A, S1:DiP, S1:DiP-A, S1:OT, S1:OT-A, S5:DiP, S5:DiP-A, S5:OT, S5:OT-A                   |
| 448 | No          | 11      | 11-B | 1000   | exp   | 0   | unif   | singleC     | J1:CBN, J1:CBN-A, J1:DiP, J1:DiP-A, J1:OT, J1:OT-A, J5:CBN, J5:CBN-A, J5:DiP, J5:DiP-A, J5:OT, J5:OT-A, S1:DiP, S1:DiP-A, S1:OT, S1:OT-A, S5:DiP, S5:DiP-A, S5:OT, S5:OT-A |
| 449 | No          | 11      | 11-B | 1000   | exp   | 0   | unif   | wholeT_0.01 | J1:DiP, J1:DiP-A, J1:OT, J1:OT-A, J5:CBN, J5:CBN-A, J5:DiP, J5:DiP-A, J5:OT, J5:OT-A, S1:DiP, S1:DiP-A, S1:OT, S1:OT-A, S5:DiP, S5:DiP-A, S5:OT, S5:OT-A                   |
| 450 | No          | 11      | 11-B | 1000   | exp   | 0   | unif   | wholeT_0.5  | J1:CBN, J1:CBN-A, J1:DiP, J1:DiP-A, J1:OT, J1:OT-A, J5:CBN, J5:CBN-A, J5:DiP, J5:DiP-A, J5:OT, J5:OT-A, S1:DiP, S1:DiP-A, S1:OT, S1:OT-A, S5:DiP, S5:DiP-A, S5:OT, S5:OT-A |

Table 8: (continued)

|     | Conjunction | Drivers | Tree | S.Size | Model | sh  | S.Time | S.Type      | Best method(s)                                                                                                                                                     |
|-----|-------------|---------|------|--------|-------|-----|--------|-------------|--------------------------------------------------------------------------------------------------------------------------------------------------------------------|
| 451 | No          | 11      | 11-B | 1000   | exp   | Inf | last   | singleC     | J1:DiP, J1:DiP-A, J1:OT, J1:OT-A, J5:DiP, J5:DiP-A, J5:OT, J5:OT-A, S1:DiP-A, S5:DiP, S5:DiP-A, S5:OT, S5:OT-A                                                     |
| 452 | No          | 11      | 11-B | 1000   | exp   | Inf | last   | wholeT_0.01 | J5:DiP, J5:DiP-A, J5:OT, J5:OT-A, S5:DiP, S5:DiP-A, S5:OT, S5:OT-A                                                                                                 |
| 453 | No          | 11      | 11-B | 1000   | exp   | Inf | last   | wholeT_0.5  | J1:DiP, J1:DiP-A, J1:OT, J1:OT-A, J5:DiP, J5:DiP-A, J5:OT, J5:OT-A, S5:DiP, S5:DiP-A, S5:OT, S5:OT-A                                                               |
| 454 | No          | 11      | 11-B | 1000   | exp   | Inf | unif   | singleC     | J1:DiP, J1:DiP-A, J1:OT, J1:OT-A, J5:CBN, J5:CBN-A, J5:DiP, J5:DiP-A, J5:OT, J5:OT-A, S5:DiP, S5:DiP-A, S5:OT, S5:OT-A                                             |
| 455 | No          | 11      | 11-B | 1000   | exp   | Inf | unif   | wholeT_0.01 | J5:DiP, J5:DiP-A, J5:OT, J5:OT-A, S5:DiP, S5:DiP-A, S5:OT, S5:OT-A                                                                                                 |
| 456 | No          | 11      | 11-B | 1000   | exp   | Inf | unif   | wholeT_0.5  | J1:DiP, J1:DiP-A, J1:OT, J1:OT-A, J5:CBN, J5:CBN-A, J5:DiP, J5:DiP-A, J5:OT, J5:OT-A, S5:DiP, S5:DiP-A, S5:OT, S5:OT-A                                             |
| 457 | No          | 11      | 11-B | 1000   | McF_4 | 0   | last   | singleC     | J1:CBN, J1:DiP, J1:DiP-A, J1:OT, J1:OT-A, J5:CBN, J5:DiP, J5:DiP-A, J5:OT, J5:OT-A, S1:DiP-A, S1:OT, S1:OT-A, S5:DiP, S5:DiP-A, S5:OT, S5:OT-A                     |
| 458 | No          | 11      | 11-B | 1000   | McF_4 | 0   | last   | wholeT_0.01 | J1:DiP, J1:DiP-A, J1:OT, J1:OT-A, J5:CBN, J5:DiP, J5:DiP-A, J5:OT, J5:OT-A, S1:DiP, S1:DiP-A, S5:DiP, S5:DiP-A, S5:OT, S5:OT-A                                     |
| 459 | No          | 11      | 11-B | 1000   | McF_4 | 0   | last   | wholeT_0.5  | J1:CBN, J1:DiP, J1:DiP-A, J1:OT, J1:OT-A, J5:CBN, J5:DiP, J5:DiP-A, J5:OT, J5:OT-A, S1:DiP-A, S1:OT, S1:OT-A, S5:DiP, S5:DiP-A, S5:OT, S5:OT-A                     |
| 460 | No          | 11      | 11-B | 1000   | McF_4 | 0   | unif   | singleC     | J1:CBN, J1:CBN-A, J1:DiP, J1:DiP-A, J1:OT, J1:OT-A, J5:DiP, J5:DiP-A, J5:OT, J5:OT-A, S1:DiP, S1:DiP-A, S1:OT, S1:OT-A, S5:CBN-A, S5:DiP, S5:DiP-A, S5:OT, S5:OT-A |

Table 8: (continued)

|     | Conjunction | Drivers | Tree | S.Size | Model | sh  | S.Time | S.Type      | Best method(s)                                                                                                                                             |
|-----|-------------|---------|------|--------|-------|-----|--------|-------------|------------------------------------------------------------------------------------------------------------------------------------------------------------|
| 461 | No          | 11      | 11-B | 1000   | McF_4 | 0   | unif   | wholeT_0.01 | J1:CBN-A, J1:DiP, J1:DiP-A, J1:OT, J1:OT-A, J5:DiP, J5:DiP-A, J5:OT, J5:OT-A, S5:DiP, S5:DiP-A, S5:OT, S5:OT-A                                             |
| 462 | No          | 11      | 11-B | 1000   | McF_4 | 0   | unif   | wholeT_0.5  | J1:CBN-A, J1:DiP, J1:DiP-A, J1:OT, J1:OT-A, J5:DiP, J5:DiP-A, J5:OT, J5:OT-A, S1:DiP, S1:DiP-A, S1:OT, S1:OT-A, S5:CBN, S5:DiP, S5:DiP-A, S5:OT, S5:OT-A   |
| 463 | No          | 11      | 11-B | 1000   | McF_4 | Inf | last   | singleC     | J1:DiP, J1:DiP-A, J1:OT, J1:OT-A, J5:DiP, J5:DiP-A, J5:OT, J5:OT-A, S1:OT, S1:OT-A, S5:DiP, S5:DiP-A, S5:OT, S5:OT-A                                       |
| 464 | No          | 11      | 11-B | 1000   | McF_4 | Inf | last   | wholeT_0.01 | J1:DiP, J1:DiP-A, J1:OT, J1:OT-A, J5:DiP, J5:DiP-A, J5:OT, J5:OT-A, S1:DiP, S1:DiP-A, S5:DiP, S5:DiP-A, S5:OT, S5:OT-A                                     |
| 465 | No          | 11      | 11-B | 1000   | McF_4 | Inf | last   | wholeT_0.5  | J1:DiP, J1:DiP-A, J1:OT, J1:OT-A, J5:DiP, J5:DiP-A, J5:OT, J5:OT-A, S1:DiP-A, S1:OT, S1:OT-A, S5:DiP, S5:DiP-A, S5:OT, S5:OT-A                             |
| 466 | No          | 11      | 11-B | 1000   | McF_4 | Inf | unif   | singleC     | J1:CBN-A, J1:DiP, J1:DiP-A, J1:OT, J1:OT-A, J5:DiP, J5:DiP-A, J5:OT, J5:OT-A, S1:DiP, S1:DiP-A, S1:OT, S1:OT-A, S5:DiP, S5:DiP-A, S5:OT, S5:OT-A           |
| 467 | No          | 11      | 11-B | 1000   | McF_4 | Inf | unif   | wholeT_0.01 | J1:CBN-A, J1:DiP, J1:DiP-A, J1:OT, J1:OT-A, J5:DiP, J5:DiP-A, J5:OT, J5:OT-A, S5:DiP, S5:DiP-A, S5:OT, S5:OT-A                                             |
| 468 | No          | 11      | 11-B | 1000   | McF_4 | Inf | unif   | wholeT_0.5  | J1:CBN-A, J1:DiP, J1:DiP-A, J1:OT, J1:OT-A, J5:DiP, J5:DiP-A, J5:OT, J5:OT-A, S1:DiP, S1:DiP-A, S1:OT, S1:OT-A, S5:CBN-A, S5:DiP, S5:DiP-A, S5:OT, S5:OT-A |
| 469 | No          | 11      | 11-B | 1000   | McF_6 | 0   | last   | singleC     | J1:DiP, J1:OT, J5:DiP, J5:OT, S1:DiP, S5:DiP, S5:OT                                                                                                        |
| 470 | No          | 11      | 11-B | 1000   | McF_6 | 0   | last   | wholeT_0.01 | J1:DiP, J1:OT, J5:DiP, J5:OT, S1:DiP, S5:DiP, S5:OT                                                                                                        |

Table 8: (continued)

|     | Conjunction | Drivers | Tree | S.Size | Model | sh  | S.Time | S.Type      | Best method(s)                                                                                                                                                                               |
|-----|-------------|---------|------|--------|-------|-----|--------|-------------|----------------------------------------------------------------------------------------------------------------------------------------------------------------------------------------------|
| 471 | No          | 11      | 11-B | 1000   | McF_6 | 0   | last   | wholeT_0.5  | J1:DiP, J1:OT, J5:DiP, J5:OT, S1:DiP, S5:DiP, S5:OT                                                                                                                                          |
| 472 | No          | 11      | 11-B | 1000   | McF_6 | 0   | unif   | singleC     | J1:CBN, J1:CBN-A, J1:DiP, J1:DiP-A, J1:OT, J1:OT-A, J5:CBN, J5:CBN-A, J5:DiP, J5:DiP-A, J5:OT, J5:OT-A, S1:DiP, S1:DiP-A, S1:OT, S1:OT-A, S5:CBN, S5:CBN-A, S5:DiP, S5:DiP-A, S5:OT, S5:OT-A |
| 473 | No          | 11      | 11-B | 1000   | McF_6 | 0   | unif   | wholeT_0.01 | J1:CBN, J1:CBN-A, J1:DiP, J1:DiP-A, J1:OT, J1:OT-A, J5:CBN, J5:CBN-A, J5:DiP, J5:DiP-A, J5:OT, J5:OT-A, S1:DiP, S1:DiP-A, S5:CBN, S5:DiP, S5:DiP-A, S5:OT, S5:OT-A                           |
| 474 | No          | 11      | 11-B | 1000   | McF_6 | 0   | unif   | wholeT_0.5  | J1:CBN, J1:CBN-A, J1:DiP, J1:DiP-A, J1:OT, J1:OT-A, J5:CBN, J5:CBN-A, J5:DiP, J5:DiP-A, J5:OT, J5:OT-A, S1:DiP, S1:DiP-A, S1:OT, S1:OT-A, S5:CBN, S5:CBN-A, S5:DiP, S5:DiP-A, S5:OT, S5:OT-A |
| 475 | No          | 11      | 11-B | 1000   | McF_6 | Inf | last   | singleC     | J1:DiP, J1:OT, J5:DiP, J5:OT, S1:DiP, S5:DiP, S5:OT                                                                                                                                          |
| 476 | No          | 11      | 11-B | 1000   | McF_6 | Inf | last   | wholeT_0.01 | J1:DiP, J1:OT, J5:DiP, J5:OT, S1:DiP, S5:DiP, S5:OT                                                                                                                                          |
| 477 | No          | 11      | 11-B | 1000   | McF_6 | Inf | last   | wholeT_0.5  | J1:DiP, J1:OT, J5:DiP, J5:OT, S1:DiP, S1:OT, S5:DiP, S5:OT                                                                                                                                   |
| 478 | No          | 11      | 11-B | 1000   | McF_6 | Inf | unif   | singleC     | J1:CBN-A, J1:DiP, J1:DiP-A, J1:OT, J1:OT-A, J5:CBN-A, J5:DiP, J5:DiP-A, J5:OT, J5:OT-A, S1:DiP, S1:DiP-A, S5:CBN, S5:CBN-A, S5:DiP, S5:DiP-A, S5:OT, S5:OT-A                                 |
| 479 | No          | 11      | 11-B | 1000   | McF_6 | Inf | unif   | wholeT_0.01 | J1:CBN-A, J1:DiP, J1:DiP-A, J1:OT, J1:OT-A, J5:CBN-A, J5:DiP, J5:DiP-A, J5:OT, J5:OT-A, S1:DiP, S1:DiP-A, S5:CBN, S5:DiP, S5:DiP-A, S5:OT, S5:OT-A                                           |
| 480 | No          | 11      | 11-B | 1000   | McF_6 | Inf | unif   | wholeT_0.5  | J1:CBN, J1:CBN-A, J1:DiP, J1:DiP-A, J1:OT, J1:OT-A, J5:CBN-A, J5:DiP, J5:DiP-A, J5:OT, J5:OT-A, S1:DiP, S1:DiP-A, S5:CBN, S5:CBN-A, S5:DiP, S5:DiP-A, S5:OT, S5:OT-A                         |

Table 8: (continued)

|     | Conjunction | Drivers | Tree | S.Size | Model | sh  | S.Time | S.Type      | Best method(s)                                                                                                                                                             |
|-----|-------------|---------|------|--------|-------|-----|--------|-------------|----------------------------------------------------------------------------------------------------------------------------------------------------------------------------|
| 481 | No          | 11      | 11-B | 200    | Bozic | 0   | last   | singleC     | J1:DiP, J1:DiP-A, J1:OT, J1:OT-A, J5:DiP, J5:DiP-A, J5:OT, J5:OT-A, S1:DiP, S1:DiP-A, S5:DiP, S5:DiP-A, S5:OT, S5:OT-A                                                     |
| 482 | No          | 11      | 11-B | 200    | Bozic | 0   | last   | wholeT_0.01 | J1:DiP, J5:DiP, J5:OT, J5:OT-A                                                                                                                                             |
| 483 | No          | 11      | 11-B | 200    | Bozic | 0   | last   | wholeT_0.5  | J1:DiP, J1:DiP-A, J1:OT, J1:OT-A, J5:DiP, J5:DiP-A, J5:OT, J5:OT-A, S1:DiP, S1:DiP-A, S5:DiP, S5:DiP-A, S5:OT, S5:OT-A                                                     |
| 484 | No          | 11      | 11-B | 200    | Bozic | 0   | unif   | singleC     | J1:DiP, J1:DiP-A, J1:OT, J1:OT-A, J5:CBN, J5:CBN-A, J5:DiP, J5:DiP-A, J5:OT, J5:OT-A, S1:DiP, S1:DiP-A, S1:OT, S1:OT-A, S5:DiP, S5:DiP-A, S5:OT, S5:OT-A                   |
| 485 | No          | 11      | 11-B | 200    | Bozic | 0   | unif   | wholeT_0.01 | J5:DiP, J5:DiP-A, J5:OT, J5:OT-A, S5:DiP, S5:DiP-A                                                                                                                         |
| 486 | No          | 11      | 11-B | 200    | Bozic | 0   | unif   | wholeT_0.5  | J1:CBN, J1:CBN-A, J1:DiP, J1:DiP-A, J1:OT, J1:OT-A, J5:CBN, J5:CBN-A, J5:DiP, J5:DiP-A, J5:OT, J5:OT-A, S1:DiP, S1:DiP-A, S1:OT, S1:OT-A, S5:DiP, S5:DiP-A, S5:OT, S5:OT-A |
| 487 | No          | 11      | 11-B | 200    | Bozic | Inf | last   | singleC     | J1:DiP, J1:DiP-A, J5:DiP, J5:DiP-A, J5:OT, J5:OT-A, S5:DiP, S5:DiP-A, S5:OT, S5:OT-A                                                                                       |
| 488 | No          | 11      | 11-B | 200    | Bozic | Inf | last   | wholeT_0.01 | J5:DiP, J5:DiP-A, J5:OT, J5:OT-A                                                                                                                                           |
| 489 | No          | 11      | 11-B | 200    | Bozic | Inf | last   | wholeT_0.5  | J1:DiP, J1:DiP-A, J5:DiP, J5:DiP-A, J5:OT, J5:OT-A, S5:DiP, S5:DiP-A, S5:OT, S5:OT-A                                                                                       |
| 490 | No          | 11      | 11-B | 200    | Bozic | Inf | unif   | singleC     | J1:CBN, J1:CBN-A, J1:DiP, J1:DiP-A, J1:OT, J1:OT-A, J5:DiP, J5:DiP-A, J5:OT, J5:OT-A, S5:DiP, S5:DiP-A, S5:OT, S5:OT-A                                                     |
| 491 | No          | 11      | 11-B | 200    | Bozic | Inf | unif   | wholeT_0.01 | J5:CBN-A, J5:DiP, J5:DiP-A, J5:OT, J5:OT-A                                                                                                                                 |
| 492 | No          | 11      | 11-B | 200    | Bozic | Inf | unif   | wholeT_0.5  | J1:DiP, J1:DiP-A, J1:OT, J1:OT-A, J5:DiP, J5:DiP-A, J5:OT, J5:OT-A, S5:DiP, S5:DiP-A, S5:OT, S5:OT-A                                                                       |



Table 8: (continued)

|     | Conjunction | Drivers | Tree | S.Size | Model | sh  | S.Time | S.Type      | Best method(s)                                                                                                                                                             |
|-----|-------------|---------|------|--------|-------|-----|--------|-------------|----------------------------------------------------------------------------------------------------------------------------------------------------------------------------|
| 493 | No          | 11      | 11-B | 200    | exp   | 0   | last   | singleC     | J1:DiP, J1:DiP-A, J1:OT, J1:OT-A, J5:CBN, J5:CBN-A, J5:DiP, J5:DiP-A, J5:OT, J5:OT-A, S1:DiP, S1:DiP-A, S1:OT, S1:OT-A, S5:DiP, S5:DiP-A, S5:OT, S5:OT-A                   |
| 494 | No          | 11      | 11-B | 200    | exp   | 0   | last   | wholeT_0.01 | J1:DiP, J1:DiP-A, J1:OT, J1:OT-A, J5:DiP, J5:DiP-A, J5:OT, J5:OT-A, S1:OT, S1:OT-A, S5:DiP, S5:DiP-A, S5:OT, S5:OT-A                                                       |
| 495 | No          | 11      | 11-B | 200    | exp   | 0   | last   | wholeT_0.5  | J1:DiP, J1:DiP-A, J1:OT, J1:OT-A, J5:CBN, J5:CBN-A, J5:DiP, J5:DiP-A, J5:OT, J5:OT-A, S1:DiP, S1:DiP-A, S1:OT, S1:OT-A, S5:DiP, S5:DiP-A, S5:OT, S5:OT-A                   |
| 496 | No          | 11      | 11-B | 200    | exp   | 0   | unif   | singleC     | J1:CBN, J1:CBN-A, J1:DiP, J1:DiP-A, J1:OT, J1:OT-A, J5:CBN, J5:CBN-A, J5:DiP, J5:DiP-A, J5:OT, J5:OT-A, S1:DiP, S1:DiP-A, S1:OT, S1:OT-A, S5:DiP, S5:DiP-A, S5:OT, S5:OT-A |
| 497 | No          | 11      | 11-B | 200    | exp   | 0   | unif   | wholeT_0.01 | J1:DiP, J1:DiP-A, J1:OT, J1:OT-A, J5:CBN, J5:CBN-A, J5:DiP, J5:DiP-A, J5:OT, J5:OT-A, S1:DiP, S1:DiP-A, S1:OT, S1:OT-A, S5:DiP, S5:DiP-A, S5:OT, S5:OT-A                   |
| 498 | No          | 11      | 11-B | 200    | exp   | 0   | unif   | wholeT_0.5  | J1:CBN, J1:CBN-A, J1:DiP, J1:DiP-A, J1:OT, J1:OT-A, J5:CBN, J5:CBN-A, J5:DiP, J5:DiP-A, J5:OT, J5:OT-A, S1:DiP, S1:DiP-A, S1:OT, S1:OT-A, S5:DiP, S5:DiP-A, S5:OT, S5:OT-A |
| 499 | No          | 11      | 11-B | 200    | exp   | Inf | last   | singleC     | J1:DiP, J1:DiP-A, J1:OT, J1:OT-A, J5:DiP, J5:DiP-A, J5:OT, J5:OT-A, S1:DiP, S1:DiP-A, S5:DiP, S5:DiP-A, S5:OT, S5:OT-A                                                     |
| 500 | No          | 11      | 11-B | 200    | exp   | Inf | last   | wholeT_0.01 | J5:DiP, J5:DiP-A, J5:OT, J5:OT-A                                                                                                                                           |
| 501 | No          | 11      | 11-B | 200    | exp   | Inf | last   | wholeT_0.5  | J1:DiP, J1:DiP-A, J1:OT, J1:OT-A, J5:DiP, J5:DiP-A, J5:OT, J5:OT-A, S1:DiP, S1:DiP-A, S5:DiP, S5:DiP-A, S5:OT, S5:OT-A                                                     |

Table 8: (continued)

|     | Conjunction | Drivers | Tree | S.Size | Model | sh  | S.Time | S.Type      | Best method(s)                                                                                                                             |
|-----|-------------|---------|------|--------|-------|-----|--------|-------------|--------------------------------------------------------------------------------------------------------------------------------------------|
| 502 | No          | 11      | 11-B | 200    | exp   | Inf | unif   | singleC     | J1:DiP, J1:DiP-A, J1:OT, J1:OT-A, J5:CBN, J5:CBN-A, J5:DiP, J5:DiP-A, J5:OT, J5:OT-A, S5:DiP, S5:DiP-A, S5:OT, S5:OT-A                     |
| 503 | No          | 11      | 11-B | 200    | exp   | Inf | unif   | wholeT_0.01 | J5:DiP, J5:DiP-A, J5:OT, J5:OT-A, S5:OT, S5:OT-A                                                                                           |
| 504 | No          | 11      | 11-B | 200    | exp   | Inf | unif   | wholeT_0.5  | J1:DiP, J1:DiP-A, J1:OT, J1:OT-A, J5:CBN, J5:CBN-A, J5:DiP, J5:DiP-A, J5:OT, J5:OT-A, S1:DiP, S1:DiP-A, S5:DiP, S5:DiP-A, S5:OT, S5:OT-A   |
| 505 | No          | 11      | 11-B | 200    | McF_4 | 0   | last   | singleC     | J1:DiP, J1:DiP-A, J1:OT, J1:OT-A, J5:DiP, J5:DiP-A, J5:OT, J5:OT-A, S1:DiP-A, S5:DiP, S5:DiP-A, S5:OT, S5:OT-A                             |
| 506 | No          | 11      | 11-B | 200    | McF_4 | 0   | last   | wholeT_0.01 | J1:DiP, J1:DiP-A, J1:OT, J1:OT-A, J5:CBN, J5:DiP, J5:DiP-A, J5:OT, J5:OT-A, S1:DiP, S1:DiP-A, S5:DiP, S5:DiP-A, S5:OT, S5:OT-A             |
| 507 | No          | 11      | 11-B | 200    | McF_4 | 0   | last   | wholeT_0.5  | J1:DiP, J1:DiP-A, J1:OT, J1:OT-A, J5:DiP, J5:DiP-A, J5:OT, J5:OT-A, S5:DiP, S5:DiP-A, S5:OT, S5:OT-A                                       |
| 508 | No          | 11      | 11-B | 200    | McF_4 | 0   | unif   | singleC     | J1:CBN, J1:CBN-A, J1:DiP, J1:DiP-A, J1:OT, J1:OT-A, J5:DiP, J5:DiP-A, J5:OT, J5:OT-A, S5:DiP, S5:DiP-A, S5:OT, S5:OT-A                     |
| 509 | No          | 11      | 11-B | 200    | McF_4 | 0   | unif   | wholeT_0.01 | J1:CBN-A, J1:DiP, J1:DiP-A, J1:OT, J1:OT-A, J5:DiP, J5:DiP-A, J5:OT, J5:OT-A, S1:DiP, S1:DiP-A, S5:DiP, S5:DiP-A, S5:OT, S5:OT-A           |
| 510 | No          | 11      | 11-B | 200    | McF_4 | 0   | unif   | wholeT_0.5  | J1:CBN-A, J1:DiP, J1:DiP-A, J1:OT, J1:OT-A, J5:DiP, J5:DiP-A, J5:OT, J5:OT-A, S1:DiP, S1:DiP-A, S5:CBN-A, S5:DiP, S5:DiP-A, S5:OT, S5:OT-A |
| 511 | No          | 11      | 11-B | 200    | McF_4 | Inf | last   | singleC     | J1:DiP, J1:DiP-A, J1:OT, J1:OT-A, J5:DiP, J5:DiP-A, J5:OT, J5:OT-A, S5:OT, S5:OT-A                                                         |
| 512 | No          | 11      | 11-B | 200    | McF_4 | Inf | last   | wholeT_0.01 | J1:DiP, J1:DiP-A, J1:OT, J1:OT-A, J5:DiP, J5:DiP-A, J5:OT, J5:OT-A, S1:DiP, S1:DiP-A, S5:DiP, S5:DiP-A, S5:OT, S5:OT-A                     |

Table 8: (continued)

|     | Conjunction | Drivers | Tree | S.Size | Model | sh  | S.Time | S.Type      | Best method(s)                                                                                                                                     |
|-----|-------------|---------|------|--------|-------|-----|--------|-------------|----------------------------------------------------------------------------------------------------------------------------------------------------|
| 513 | No          | 11      | 11-B | 200    | McF_4 | Inf | last   | wholeT_0.5  | J1:DiP, J1:DiP-A, J1:OT, J1:OT-A, J5:DiP, J5:DiP-A, J5:OT, J5:OT-A, S1:DiP, S1:DiP-A, S5:DiP, S5:DiP-A, S5:OT, S5:OT-A                             |
| 514 | No          | 11      | 11-B | 200    | McF_4 | Inf | unif   | singleC     | J1:CBN-A, J1:DiP, J1:DiP-A, J1:OT, J1:OT-A, J5:DiP, J5:DiP-A, J5:OT, J5:OT-A, S1:DiP, S5:CBN-A, S5:DiP, S5:DiP-A, S5:OT, S5:OT-A                   |
| 515 | No          | 11      | 11-B | 200    | McF_4 | Inf | unif   | wholeT_0.01 | J1:DiP, J1:DiP-A, J1:OT, J1:OT-A, J5:DiP, J5:DiP-A, J5:OT, J5:OT-A, S1:DiP, S1:DiP-A, S5:DiP, S5:DiP-A, S5:OT, S5:OT-A                             |
| 516 | No          | 11      | 11-B | 200    | McF_4 | Inf | unif   | wholeT_0.5  | J1:CBN-A, J1:DiP, J1:DiP-A, J1:OT, J1:OT-A, J5:DiP, J5:DiP-A, J5:OT, J5:OT-A, S1:DiP, S1:DiP-A, S5:DiP, S5:DiP-A, S5:OT, S5:OT-A                   |
| 517 | No          | 11      | 11-B | 200    | McF_6 | 0   | last   | singleC     | J1:DiP, J1:OT, J5:DiP, J5:OT, S1:DiP, S5:DiP, S5:OT                                                                                                |
| 518 | No          | 11      | 11-B | 200    | McF_6 | 0   | last   | wholeT_0.01 | J1:DiP, J1:OT, J5:DiP, J5:OT, S1:DiP, S5:DiP, S5:OT                                                                                                |
| 519 | No          | 11      | 11-B | 200    | McF_6 | 0   | last   | wholeT_0.5  | J1:DiP, J1:OT, J5:DiP, J5:OT, S1:DiP, S5:DiP, S5:OT                                                                                                |
| 520 | No          | 11      | 11-B | 200    | McF_6 | 0   | unif   | singleC     | J1:CBN, J1:CBN-A, J1:DiP, J1:OT, J1:OT-A, J5:CBN, J5:CBN-A, J5:DiP, J5:DiP-A, J5:OT, J5:OT-A, S5:CBN, S5:CBN-A, S5:OT, S5:OT-A                     |
| 521 | No          | 11      | 11-B | 200    | McF_6 | 0   | unif   | wholeT_0.01 | J1:CBN, J1:CBN-A, J1:DiP, J1:DiP-A, J1:OT, J1:OT-A, J5:CBN, J5:CBN-A, J5:DiP, J5:DiP-A, J5:OT, J5:OT-A, S5:CBN-A, S5:DiP, S5:DiP-A, S5:OT, S5:OT-A |
| 522 | No          | 11      | 11-B | 200    | McF_6 | 0   | unif   | wholeT_0.5  | J1:CBN, J1:CBN-A, J1:DiP, J1:OT, J1:OT-A, J5:CBN, J5:CBN-A, J5:DiP, J5:DiP-A, J5:OT, J5:OT-A, S5:OT, S5:OT-A                                       |
| 523 | No          | 11      | 11-B | 200    | McF_6 | Inf | last   | singleC     | J1:DiP, J1:OT, J5:DiP, J5:OT, S1:DiP, S5:DiP, S5:OT                                                                                                |
| 524 | No          | 11      | 11-B | 200    | McF_6 | Inf | last   | wholeT_0.01 | J1:DiP, J1:OT, J5:DiP, J5:OT, S1:DiP, S5:DiP, S5:OT                                                                                                |

Table 8: (continued)

|     | Conjunction | Drivers | Tree | S.Size | Model | sh  | S.Time | S.Type      | Best method(s)                                                                                                                           |
|-----|-------------|---------|------|--------|-------|-----|--------|-------------|------------------------------------------------------------------------------------------------------------------------------------------|
| 525 | No          | 11      | 11-B | 200    | McF_6 | Inf | last   | wholeT_0.5  | J1:DiP, J1:OT, J5:DiP, J5:OT, S1:DiP, S5:DiP, S5:OT                                                                                      |
| 526 | No          | 11      | 11-B | 200    | McF_6 | Inf | unif   | singleC     | J1:CBN, J1:CBN-A, J1:OT, J1:OT-A, J5:CBN-A, J5:DiP, J5:DiP-A, J5:OT, J5:OT-A, S5:CBN-A                                                   |
| 527 | No          | 11      | 11-B | 200    | McF_6 | Inf | unif   | wholeT_0.01 | J1:CBN-A, J1:DiP, J1:OT, J1:OT-A, J5:CBN-A, J5:DiP, J5:DiP-A, J5:OT, J5:OT-A, S5:CBN, S5:OT, S5:OT-A                                     |
| 528 | No          | 11      | 11-B | 200    | McF_6 | Inf | unif   | wholeT_0.5  | J1:CBN-A, J5:CBN-A, J5:DiP, J5:DiP-A, J5:OT, J5:OT-A, S5:CBN-A                                                                           |
| 529 | No          | 11      | 11-B | 100    | Bozic | 0   | last   | singleC     | J1:DiP, J1:DiP-A, J5:DiP, J5:DiP-A, J5:OT, J5:OT-A, S1:DiP, S1:DiP-A, S5:DiP, S5:DiP-A, S5:OT, S5:OT-A                                   |
| 530 | No          | 11      | 11-B | 100    | Bozic | 0   | last   | wholeT_0.01 | J1:DiP, J1:DiP-A, J5:DiP, J5:DiP-A, J5:OT, J5:OT-A                                                                                       |
| 531 | No          | 11      | 11-B | 100    | Bozic | 0   | last   | wholeT_0.5  | J1:DiP, J1:DiP-A, J5:DiP, J5:DiP-A, J5:OT, J5:OT-A, S1:DiP, S1:DiP-A, S5:DiP, S5:DiP-A, S5:OT, S5:OT-A                                   |
| 532 | No          | 11      | 11-B | 100    | Bozic | 0   | unif   | singleC     | J1:DiP, J1:DiP-A, J1:OT, J1:OT-A, J5:CBN, J5:CBN-A, J5:DiP, J5:DiP-A, J5:OT, J5:OT-A, S1:DiP, S1:DiP-A, S5:DiP, S5:DiP-A, S5:OT, S5:OT-A |
| 533 | No          | 11      | 11-B | 100    | Bozic | 0   | unif   | wholeT_0.01 | J1:DiP, J1:DiP-A, J5:DiP, J5:DiP-A, J5:OT, J5:OT-A, S5:DiP, S5:DiP-A, S5:OT, S5:OT-A                                                     |
| 534 | No          | 11      | 11-B | 100    | Bozic | 0   | unif   | wholeT_0.5  | J1:DiP, J1:DiP-A, J1:OT, J1:OT-A, J5:CBN, J5:CBN-A, J5:DiP, J5:DiP-A, J5:OT, J5:OT-A, S1:DiP, S1:DiP-A, S5:DiP, S5:DiP-A, S5:OT, S5:OT-A |
| 535 | No          | 11      | 11-B | 100    | Bozic | Inf | last   | singleC     | J1:DiP, J1:DiP-A, J5:DiP, J5:DiP-A, J5:OT, J5:OT-A, S5:DiP, S5:DiP-A                                                                     |
| 536 | No          | 11      | 11-B | 100    | Bozic | Inf | last   | wholeT_0.01 | J5:DiP, J5:DiP-A, J5:OT, J5:OT-A                                                                                                         |
| 537 | No          | 11      | 11-B | 100    | Bozic | Inf | last   | wholeT_0.5  | J1:DiP, J1:DiP-A, J5:DiP, J5:DiP-A, J5:OT, J5:OT-A, S1:DiP, S1:DiP-A, S5:DiP, S5:DiP-A                                                   |
| 538 | No          | 11      | 11-B | 100    | Bozic | Inf | unif   | singleC     | J1:DiP, J1:DiP-A, J5:DiP, J5:DiP-A, J5:OT, J5:OT-A, S5:DiP, S5:DiP-A, S5:OT, S5:OT-A                                                     |
| 539 | No          | 11      | 11-B | 100    | Bozic | Inf | unif   | wholeT_0.01 | J5:DiP, J5:DiP-A, J5:OT, J5:OT-A                                                                                                         |

Table 8: (continued)

|     | Conjunction | Drivers | Tree | S.Size | Model | sh  | S.Time | S.Type      | Best method(s)                                                                                                                                                             |
|-----|-------------|---------|------|--------|-------|-----|--------|-------------|----------------------------------------------------------------------------------------------------------------------------------------------------------------------------|
| 540 | No          | 11      | 11-B | 100    | Bozic | Inf | unif   | wholeT_0.5  | J1:DiP, J1:DiP-A, J5:DiP, J5:DiP-A, J5:OT, J5:OT-A, S5:DiP, S5:DiP-A, S5:OT, S5:OT-A                                                                                       |
| 541 | No          | 11      | 11-B | 100    | exp   | 0   | last   | singleC     | J1:DiP, J1:DiP-A, J1:OT, J1:OT-A, J5:CBN, J5:CBN-A, J5:DiP, J5:DiP-A, J5:OT, J5:OT-A, S1:DiP, S1:DiP-A, S1:OT, S1:OT-A, S5:DiP, S5:DiP-A, S5:OT, S5:OT-A                   |
| 542 | No          | 11      | 11-B | 100    | exp   | 0   | last   | wholeT_0.01 | J1:DiP, J1:DiP-A, J1:OT, J1:OT-A, J5:DiP, J5:DiP-A, J5:OT, J5:OT-A, S1:DiP, S1:DiP-A, S5:DiP, S5:DiP-A, S5:OT, S5:OT-A                                                     |
| 543 | No          | 11      | 11-B | 100    | exp   | 0   | last   | wholeT_0.5  | J1:DiP, J1:DiP-A, J1:OT, J1:OT-A, J5:CBN, J5:CBN-A, J5:DiP, J5:DiP-A, J5:OT, J5:OT-A, S1:DiP, S1:DiP-A, S1:OT, S1:OT-A, S5:DiP, S5:DiP-A, S5:OT, S5:OT-A                   |
| 544 | No          | 11      | 11-B | 100    | exp   | 0   | unif   | singleC     | J1:DiP, J1:DiP-A, J1:OT, J1:OT-A, J5:CBN, J5:CBN-A, J5:DiP, J5:DiP-A, J5:OT, J5:OT-A, S1:DiP, S1:DiP-A, S1:OT, S1:OT-A, S5:DiP, S5:DiP-A, S5:OT, S5:OT-A                   |
| 545 | No          | 11      | 11-B | 100    | exp   | 0   | unif   | wholeT_0.01 | J1:DiP, J1:DiP-A, J1:OT, J1:OT-A, J5:CBN, J5:CBN-A, J5:DiP, J5:DiP-A, J5:OT, J5:OT-A, S1:DiP, S1:DiP-A, S5:DiP, S5:DiP-A, S5:OT, S5:OT-A                                   |
| 546 | No          | 11      | 11-B | 100    | exp   | 0   | unif   | wholeT_0.5  | J1:CBN, J1:CBN-A, J1:DiP, J1:DiP-A, J1:OT, J1:OT-A, J5:CBN, J5:CBN-A, J5:DiP, J5:DiP-A, J5:OT, J5:OT-A, S1:DiP, S1:DiP-A, S1:OT, S1:OT-A, S5:DiP, S5:DiP-A, S5:OT, S5:OT-A |
| 547 | No          | 11      | 11-B | 100    | exp   | Inf | last   | singleC     | J1:DiP, J1:DiP-A, J5:DiP, J5:DiP-A, J5:OT, J5:OT-A, S1:DiP, S1:DiP-A, S5:DiP, S5:DiP-A, S5:OT, S5:OT-A                                                                     |
| 548 | No          | 11      | 11-B | 100    | exp   | Inf | last   | wholeT_0.01 | J5:CBN-A, J5:DiP, J5:DiP-A, J5:OT, J5:OT-A                                                                                                                                 |
| 549 | No          | 11      | 11-B | 100    | exp   | Inf | last   | wholeT_0.5  | J1:DiP, J1:DiP-A, J5:DiP, J5:DiP-A, J5:OT, J5:OT-A, S1:DiP, S1:DiP-A, S5:DiP, S5:DiP-A, S5:OT, S5:OT-A                                                                     |

Table 8: (continued)

|     | Conjunction | Drivers | Tree | S.Size | Model | sh  | S.Time | S.Type      | Best method(s)                                                                                                                   |
|-----|-------------|---------|------|--------|-------|-----|--------|-------------|----------------------------------------------------------------------------------------------------------------------------------|
| 550 | No          | 11      | 11-B | 100    | exp   | Inf | unif   | singleC     | J1:DiP, J1:DiP-A, J5:DiP, J5:DiP-A, J5:OT, J5:OT-A, S1:DiP, S1:DiP-A, S5:DiP, S5:DiP-A, S5:OT, S5:OT-A                           |
| 551 | No          | 11      | 11-B | 100    | exp   | Inf | unif   | wholeT_0.01 | J5:DiP, J5:DiP-A, J5:OT, J5:OT-A, S5:DiP, S5:DiP-A, S5:OT, S5:OT-A                                                               |
| 552 | No          | 11      | 11-B | 100    | exp   | Inf | unif   | wholeT_0.5  | J1:DiP, J1:DiP-A, J5:CBN, J5:CBN-A, J5:DiP, J5:DiP-A, J5:OT, J5:OT-A, S1:DiP, S1:DiP-A, S5:DiP, S5:DiP-A, S5:OT, S5:OT-A         |
| 553 | No          | 11      | 11-B | 100    | McF_4 | 0   | last   | singleC     | J1:DiP, J1:DiP-A, J5:DiP, J5:DiP-A, J5:OT, J5:OT-A, S1:DiP, S1:DiP-A, S5:DiP, S5:DiP-A, S5:OT, S5:OT-A                           |
| 554 | No          | 11      | 11-B | 100    | McF_4 | 0   | last   | wholeT_0.01 | J1:DiP, J1:DiP-A, J5:DiP, J5:DiP-A, J5:OT, J5:OT-A, S1:DiP, S1:DiP-A, S5:DiP, S5:DiP-A, S5:OT, S5:OT-A                           |
| 555 | No          | 11      | 11-B | 100    | McF_4 | 0   | last   | wholeT_0.5  | J1:DiP, J1:DiP-A, J5:DiP, J5:DiP-A, J5:OT, J5:OT-A, S1:DiP, S1:DiP-A, S5:DiP, S5:DiP-A, S5:OT, S5:OT-A                           |
| 556 | No          | 11      | 11-B | 100    | McF_4 | 0   | unif   | singleC     | J1:CBN-A, J1:DiP, J1:DiP-A, J1:OT, J1:OT-A, J5:DiP, J5:DiP-A, J5:OT, J5:OT-A, S1:DiP, S1:DiP-A, S5:DiP, S5:DiP-A, S5:OT, S5:OT-A |
| 557 | No          | 11      | 11-B | 100    | McF_4 | 0   | unif   | wholeT_0.01 | J1:DiP, J1:DiP-A, J5:DiP, J5:DiP-A, J5:OT, J5:OT-A, S5:DiP, S5:DiP-A, S5:OT, S5:OT-A                                             |
| 558 | No          | 11      | 11-B | 100    | McF_4 | 0   | unif   | wholeT_0.5  | J1:CBN-A, J1:DiP, J1:DiP-A, J1:OT, J1:OT-A, J5:DiP, J5:DiP-A, J5:OT, J5:OT-A, S1:DiP, S1:DiP-A, S5:DiP, S5:DiP-A, S5:OT, S5:OT-A |
| 559 | No          | 11      | 11-B | 100    | McF_4 | Inf | last   | singleC     | J1:DiP, J1:DiP-A, J5:DiP, J5:DiP-A, J5:OT, J5:OT-A, S1:DiP, S1:DiP-A, S5:DiP, S5:DiP-A, S5:OT, S5:OT-A                           |
| 560 | No          | 11      | 11-B | 100    | McF_4 | Inf | last   | wholeT_0.01 | J1:DiP, J1:DiP-A, J5:DiP, J5:DiP-A, J5:OT, J5:OT-A, S1:DiP, S5:DiP, S5:DiP-A, S5:OT, S5:OT-A                                     |
| 561 | No          | 11      | 11-B | 100    | McF_4 | Inf | last   | wholeT_0.5  | J1:DiP, J1:DiP-A, J5:DiP, J5:DiP-A, J5:OT, J5:OT-A, S1:DiP, S1:DiP-A, S5:DiP, S5:DiP-A, S5:OT, S5:OT-A                           |

Table 8: (continued)

|     | Conjunction | Drivers | Tree | S.Size | Model | sh  | S.Time | S.Type      | Best method(s)                                                                                                         |
|-----|-------------|---------|------|--------|-------|-----|--------|-------------|------------------------------------------------------------------------------------------------------------------------|
| 562 | No          | 11      | 11-B | 100    | McF_4 | Inf | unif   | singleC     | J1:DiP, J1:DiP-A, J1:OT, J1:OT-A, J5:DiP, J5:DiP-A, J5:OT, J5:OT-A, S1:DiP, S1:DiP-A, S5:DiP, S5:DiP-A, S5:OT, S5:OT-A |
| 563 | No          | 11      | 11-B | 100    | McF_4 | Inf | unif   | wholeT_0.01 | J1:DiP, J1:DiP-A, J5:DiP, J5:DiP-A, J5:OT, J5:OT-A, S5:DiP, S5:DiP-A, S5:OT, S5:OT-A                                   |
| 564 | No          | 11      | 11-B | 100    | McF_4 | Inf | unif   | wholeT_0.5  | J1:DiP, J1:DiP-A, J5:DiP, J5:DiP-A, J5:OT, J5:OT-A, S1:DiP, S1:DiP-A, S5:DiP, S5:DiP-A, S5:OT, S5:OT-A                 |
| 565 | No          | 11      | 11-B | 100    | McF_6 | 0   | last   | singleC     | J1:DiP, J1:OT, J5:DiP, J5:OT, S1:DiP, S5:DiP, S5:OT                                                                    |
| 566 | No          | 11      | 11-B | 100    | McF_6 | 0   | last   | wholeT_0.01 | J1:DiP, J5:DiP, J5:OT, S1:DiP, S5:DiP, S5:OT                                                                           |
| 567 | No          | 11      | 11-B | 100    | McF_6 | 0   | last   | wholeT_0.5  | J1:DiP, J1:OT, J5:DiP, J5:OT, S1:DiP, S5:DiP, S5:OT                                                                    |
| 568 | No          | 11      | 11-B | 100    | McF_6 | 0   | unif   | singleC     | J1:CBN, J1:CBN-A, J5:CBN, J5:CBN-A, J5:DiP, J5:OT, J5:OT-A                                                             |
| 569 | No          | 11      | 11-B | 100    | McF_6 | 0   | unif   | wholeT_0.01 | J1:DiP, J5:CBN-A, J5:DiP, J5:DiP-A, J5:OT, J5:OT-A                                                                     |
| 570 | No          | 11      | 11-B | 100    | McF_6 | 0   | unif   | wholeT_0.5  | J1:CBN, J1:CBN-A, J1:DiP, J5:CBN, J5:CBN-A, J5:DiP, J5:DiP-A, J5:OT, J5:OT-A, S5:CBN-A                                 |
| 571 | No          | 11      | 11-B | 100    | McF_6 | Inf | last   | singleC     | J1:DiP, J5:DiP, J5:OT, S1:DiP, S5:DiP, S5:OT                                                                           |
| 572 | No          | 11      | 11-B | 100    | McF_6 | Inf | last   | wholeT_0.01 | J1:DiP, J5:DiP, J5:OT, S1:DiP, S5:DiP                                                                                  |
| 573 | No          | 11      | 11-B | 100    | McF_6 | Inf | last   | wholeT_0.5  | J1:DiP, J5:DiP, J5:OT                                                                                                  |
| 574 | No          | 11      | 11-B | 100    | McF_6 | Inf | unif   | singleC     | J5:CBN-A, J5:DiP, J5:OT, J5:OT-A, S5:CBN                                                                               |
| 575 | No          | 11      | 11-B | 100    | McF_6 | Inf | unif   | wholeT_0.01 | J5:CBN-A, J5:DiP, J5:DiP-A, J5:OT, J5:OT-A                                                                             |
| 576 | No          | 11      | 11-B | 100    | McF_6 | Inf | unif   | wholeT_0.5  | J1:CBN-A, J1:DiP, J5:CBN-A, J5:DiP, J5:DiP-A, J5:OT, J5:OT-A                                                           |
| 577 | No          | 9       | 9-B  | 1000   | Bozic | 0   | last   | singleC     | J1:DiP, J1:DiP-A, J1:OT, J1:OT-A, J5:DiP, J5:DiP-A, J5:OT, J5:OT-A, S1:OT, S1:OT-A, S5:DiP, S5:DiP-A, S5:OT, S5:OT-A   |

Table 8: (continued)

|     | Conjunction | Drivers | Tree | S.Size | Model | sh  | S.Time | S.Type      | Best method(s)                                                                                                                                                                 |
|-----|-------------|---------|------|--------|-------|-----|--------|-------------|--------------------------------------------------------------------------------------------------------------------------------------------------------------------------------|
| 578 | No          | 9       | 9-B  | 1000   | Bozic | 0   | last   | wholeT_0.01 | J1:CBN-A, J1:DiP, J1:DiP-A, J1:OT, J1:OT-A, J5:CBN-A, J5:DiP, J5:DiP-A, J5:OT, J5:OT-A, S1:CBN-A, S1:DiP, S1:DiP-A, S1:OT, S1:OT-A, S5:CBN-A, S5:DiP, S5:DiP-A, S5:OT, S5:OT-A |
| 579 | No          | 9       | 9-B  | 1000   | Bozic | 0   | last   | wholeT_0.5  | J1:DiP, J1:DiP-A, J1:OT, J1:OT-A, J5:CBN, J5:CBN-A, J5:DiP, J5:DiP-A, J5:OT, J5:OT-A, S1:OT, S1:OT-A, S5:DiP, S5:DiP-A, S5:OT, S5:OT-A                                         |
| 580 | No          | 9       | 9-B  | 1000   | Bozic | 0   | unif   | singleC     | J1:DiP, J1:DiP-A, J1:OT, J1:OT-A, J5:CBN, J5:CBN-A, J5:DiP, J5:DiP-A, J5:OT, J5:OT-A, S1:DiP, S1:DiP-A, S1:OT, S1:OT-A, S5:DiP, S5:DiP-A, S5:OT, S5:OT-A                       |
| 581 | No          | 9       | 9-B  | 1000   | Bozic | 0   | unif   | wholeT_0.01 | J1:DiP, J1:DiP-A, J1:OT, J1:OT-A, J5:DiP, J5:DiP-A, J5:OT, J5:OT-A, S5:DiP, S5:DiP-A, S5:OT, S5:OT-A                                                                           |
| 582 | No          | 9       | 9-B  | 1000   | Bozic | 0   | unif   | wholeT_0.5  | J1:CBN, J1:CBN-A, J1:DiP, J1:DiP-A, J1:OT, J1:OT-A, J5:CBN, J5:CBN-A, J5:DiP, J5:DiP-A, J5:OT, J5:OT-A, S1:DiP, S1:DiP-A, S1:OT, S1:OT-A, S5:DiP, S5:DiP-A, S5:OT, S5:OT-A     |
| 583 | No          | 9       | 9-B  | 1000   | Bozic | Inf | last   | singleC     | J1:DiP, J1:DiP-A, J1:OT, J1:OT-A, J5:DiP, J5:DiP-A, J5:OT, J5:OT-A, S1:DiP, S1:DiP-A, S5:DiP, S5:DiP-A, S5:OT, S5:OT-A                                                         |
| 584 | No          | 9       | 9-B  | 1000   | Bozic | Inf | last   | wholeT_0.01 | J5:DiP, J5:DiP-A                                                                                                                                                               |
| 585 | No          | 9       | 9-B  | 1000   | Bozic | Inf | last   | wholeT_0.5  | J1:DiP, J1:DiP-A, J1:OT, J1:OT-A, J5:DiP, J5:DiP-A, J5:OT, J5:OT-A, S1:DiP, S1:DiP-A, S5:DiP, S5:DiP-A, S5:OT, S5:OT-A                                                         |
| 586 | No          | 9       | 9-B  | 1000   | Bozic | Inf | unif   | singleC     | J1:DiP, J1:DiP-A, J1:OT, J1:OT-A, J5:CBN, J5:CBN-A, J5:DiP, J5:DiP-A, J5:OT, J5:OT-A, S5:DiP, S5:DiP-A, S5:OT, S5:OT-A                                                         |
| 587 | No          | 9       | 9-B  | 1000   | Bozic | Inf | unif   | wholeT_0.01 | J1:CBN-A, J5:DiP, J5:DiP-A, J5:OT, J5:OT-A                                                                                                                                     |



Table 8: (continued)

|     | Conjunction | Drivers | Tree | S.Size | Model | sh  | S.Time | S.Type      | Best method(s)                                                                                                                                                             |
|-----|-------------|---------|------|--------|-------|-----|--------|-------------|----------------------------------------------------------------------------------------------------------------------------------------------------------------------------|
| 588 | No          | 9       | 9-B  | 1000   | Bozic | Inf | unif   | wholeT_0.5  | J1:DiP, J1:DiP-A, J1:OT, J1:OT-A, J5:CBN, J5:CBN-A, J5:DiP, J5:DiP-A, J5:OT, J5:OT-A, S5:DiP, S5:DiP-A, S5:OT, S5:OT-A                                                     |
| 589 | No          | 9       | 9-B  | 1000   | exp   | 0   | last   | singleC     | J1:DiP, J1:DiP-A, J1:OT, J1:OT-A, J5:CBN, J5:CBN-A, J5:DiP, J5:DiP-A, J5:OT, J5:OT-A, S1:DiP, S1:DiP-A, S1:OT, S1:OT-A, S5:DiP, S5:DiP-A, S5:OT, S5:OT-A                   |
| 590 | No          | 9       | 9-B  | 1000   | exp   | 0   | last   | wholeT_0.01 | J1:DiP, J1:DiP-A, J1:OT, J1:OT-A, J5:DiP, J5:DiP-A, J5:OT, J5:OT-A, S1:DiP-A, S1:OT, S1:OT-A, S5:DiP, S5:DiP-A, S5:OT, S5:OT-A                                             |
| 591 | No          | 9       | 9-B  | 1000   | exp   | 0   | last   | wholeT_0.5  | J1:DiP, J1:DiP-A, J1:OT, J1:OT-A, J5:CBN, J5:CBN-A, J5:DiP, J5:DiP-A, J5:OT, J5:OT-A, S1:DiP, S1:DiP-A, S1:OT, S1:OT-A, S5:DiP, S5:DiP-A, S5:OT, S5:OT-A                   |
| 592 | No          | 9       | 9-B  | 1000   | exp   | 0   | unif   | singleC     | J1:CBN, J1:CBN-A, J1:DiP, J1:DiP-A, J1:OT, J1:OT-A, J5:CBN, J5:CBN-A, J5:DiP, J5:DiP-A, J5:OT, J5:OT-A, S1:DiP, S1:DiP-A, S1:OT, S1:OT-A, S5:DiP, S5:DiP-A, S5:OT, S5:OT-A |
| 593 | No          | 9       | 9-B  | 1000   | exp   | 0   | unif   | wholeT_0.01 | J1:DiP, J1:DiP-A, J1:OT, J1:OT-A, J5:CBN, J5:CBN-A, J5:DiP, J5:DiP-A, J5:OT, J5:OT-A, S1:DiP, S1:DiP-A, S1:OT, S1:OT-A, S5:DiP, S5:DiP-A, S5:OT, S5:OT-A                   |
| 594 | No          | 9       | 9-B  | 1000   | exp   | 0   | unif   | wholeT_0.5  | J1:CBN, J1:CBN-A, J1:DiP, J1:DiP-A, J1:OT, J1:OT-A, J5:CBN, J5:CBN-A, J5:DiP, J5:DiP-A, J5:OT, J5:OT-A, S1:DiP, S1:DiP-A, S1:OT, S1:OT-A, S5:DiP, S5:DiP-A, S5:OT, S5:OT-A |
| 595 | No          | 9       | 9-B  | 1000   | exp   | Inf | last   | singleC     | J1:DiP, J1:DiP-A, J1:OT, J1:OT-A, J5:DiP, J5:DiP-A, J5:OT, J5:OT-A, S1:DiP-A, S5:DiP, S5:DiP-A, S5:OT, S5:OT-A                                                             |
| 596 | No          | 9       | 9-B  | 1000   | exp   | Inf | last   | wholeT_0.01 | J5:DiP, J5:DiP-A                                                                                                                                                           |

Table 8: (continued)

|     | Conjunction | Drivers | Tree | S.Size | Model | sh  | S.Time | S.Type      | Best method(s)                                                                                                                                           |
|-----|-------------|---------|------|--------|-------|-----|--------|-------------|----------------------------------------------------------------------------------------------------------------------------------------------------------|
| 597 | No          | 9       | 9-B  | 1000   | exp   | Inf | last   | wholeT_0.5  | J1:DiP, J1:DiP-A, J1:OT, J1:OT-A, J5:DiP, J5:DiP-A, J5:OT, J5:OT-A, S1:DiP, S1:DiP-A, S5:DiP, S5:DiP-A, S5:OT, S5:OT-A                                   |
| 598 | No          | 9       | 9-B  | 1000   | exp   | Inf | unif   | singleC     | J1:DiP, J1:DiP-A, J1:OT, J1:OT-A, J5:CBN, J5:CBN-A, J5:DiP, J5:DiP-A, J5:OT, J5:OT-A, S1:DiP, S1:DiP-A, S1:OT, S1:OT-A, S5:DiP, S5:DiP-A, S5:OT, S5:OT-A |
| 599 | No          | 9       | 9-B  | 1000   | exp   | Inf | unif   | wholeT_0.01 | J5:DiP, J5:DiP-A, J5:OT, J5:OT-A, S5:DiP, S5:DiP-A, S5:OT, S5:OT-A                                                                                       |
| 600 | No          | 9       | 9-B  | 1000   | exp   | Inf | unif   | wholeT_0.5  | J1:DiP, J1:DiP-A, J1:OT, J1:OT-A, J5:CBN, J5:CBN-A, J5:DiP, J5:DiP-A, J5:OT, J5:OT-A, S1:DiP, S1:DiP-A, S1:OT, S1:OT-A, S5:DiP, S5:DiP-A, S5:OT, S5:OT-A |
| 601 | No          | 9       | 9-B  | 1000   | McF_4 | 0   | last   | singleC     | J1:DiP, J1:DiP-A, J1:OT, J1:OT-A, J5:CBN, J5:DiP, J5:DiP-A, J5:OT, J5:OT-A, S1:DiP, S1:DiP-A, S1:OT, S1:OT-A, S5:DiP, S5:DiP-A, S5:OT, S5:OT-A           |
| 602 | No          | 9       | 9-B  | 1000   | McF_4 | 0   | last   | wholeT_0.01 | J1:DiP, J1:DiP-A, J1:OT, J1:OT-A, J5:CBN, J5:DiP, J5:DiP-A, J5:OT, J5:OT-A, S1:DiP, S1:DiP-A, S5:DiP, S5:DiP-A, S5:OT, S5:OT-A                           |
| 603 | No          | 9       | 9-B  | 1000   | McF_4 | 0   | last   | wholeT_0.5  | J1:DiP, J1:DiP-A, J1:OT, J1:OT-A, J5:CBN, J5:DiP, J5:DiP-A, J5:OT, J5:OT-A, S1:DiP-A, S1:OT, S1:OT-A, S5:DiP, S5:DiP-A, S5:OT, S5:OT-A                   |
| 604 | No          | 9       | 9-B  | 1000   | McF_4 | 0   | unif   | singleC     | J1:DiP, J1:DiP-A, J1:OT, J1:OT-A, J5:DiP, J5:DiP-A, J5:OT, J5:OT-A, S1:DiP, S1:DiP-A, S1:OT, S1:OT-A, S5:DiP, S5:DiP-A, S5:OT, S5:OT-A                   |
| 605 | No          | 9       | 9-B  | 1000   | McF_4 | 0   | unif   | wholeT_0.01 | J1:DiP, J1:DiP-A, J1:OT, J1:OT-A, J5:DiP, J5:DiP-A, J5:OT, J5:OT-A, S1:DiP-A, S5:DiP, S5:DiP-A, S5:OT, S5:OT-A                                           |

Table 8: (continued)

|     | Conjunction | Drivers | Tree | S.Size | Model | sh  | S.Time | S.Type      | Best method(s)                                                                                                                                                                               |
|-----|-------------|---------|------|--------|-------|-----|--------|-------------|----------------------------------------------------------------------------------------------------------------------------------------------------------------------------------------------|
| 606 | No          | 9       | 9-B  | 1000   | McF_4 | 0   | unif   | wholeT_0.5  | J1:DiP, J1:DiP-A, J1:OT, J1:OT-A, J5:DiP, J5:DiP-A, J5:OT, J5:OT-A, S1:DiP, S1:DiP-A, S1:OT, S1:OT-A, S5:DiP, S5:DiP-A, S5:OT, S5:OT-A                                                       |
| 607 | No          | 9       | 9-B  | 1000   | McF_4 | Inf | last   | singleC     | J1:DiP, J1:DiP-A, J1:OT, J1:OT-A, J5:DiP, J5:DiP-A, J5:OT, J5:OT-A, S1:OT, S1:OT-A, S5:DiP, S5:DiP-A, S5:OT, S5:OT-A                                                                         |
| 608 | No          | 9       | 9-B  | 1000   | McF_4 | Inf | last   | wholeT_0.01 | J1:DiP, J1:DiP-A, J1:OT, J1:OT-A, J5:DiP, J5:DiP-A, J5:OT, J5:OT-A, S1:DiP, S1:DiP-A, S5:DiP, S5:DiP-A, S5:OT, S5:OT-A                                                                       |
| 609 | No          | 9       | 9-B  | 1000   | McF_4 | Inf | last   | wholeT_0.5  | J1:DiP, J1:DiP-A, J1:OT, J1:OT-A, J5:DiP, J5:DiP-A, J5:OT, J5:OT-A, S1:DiP, S1:DiP-A, S1:OT, S1:OT-A, S5:DiP, S5:DiP-A, S5:OT, S5:OT-A                                                       |
| 610 | No          | 9       | 9-B  | 1000   | McF_4 | Inf | unif   | singleC     | J1:DiP, J1:DiP-A, J1:OT, J1:OT-A, J5:DiP, J5:DiP-A, J5:OT, J5:OT-A, S1:DiP, S1:DiP-A, S1:OT, S1:OT-A, S5:DiP, S5:DiP-A, S5:OT, S5:OT-A                                                       |
| 611 | No          | 9       | 9-B  | 1000   | McF_4 | Inf | unif   | wholeT_0.01 | J1:DiP, J1:DiP-A, J1:OT, J1:OT-A, J5:DiP, J5:DiP-A, J5:OT, J5:OT-A, S1:DiP-A, S5:DiP, S5:DiP-A, S5:OT, S5:OT-A                                                                               |
| 612 | No          | 9       | 9-B  | 1000   | McF_4 | Inf | unif   | wholeT_0.5  | J1:DiP, J1:DiP-A, J1:OT, J1:OT-A, J5:DiP, J5:DiP-A, J5:OT, J5:OT-A, S1:DiP, S1:DiP-A, S1:OT, S1:OT-A, S5:DiP, S5:DiP-A, S5:OT, S5:OT-A                                                       |
| 613 | No          | 9       | 9-B  | 1000   | McF_6 | 0   | last   | singleC     | J1:DiP, J1:OT, J5:DiP, J5:OT, S1:DiP, S5:DiP, S5:OT                                                                                                                                          |
| 614 | No          | 9       | 9-B  | 1000   | McF_6 | 0   | last   | wholeT_0.01 | J1:DiP, J1:OT, J5:DiP, J5:OT, S1:DiP, S5:DiP, S5:OT                                                                                                                                          |
| 615 | No          | 9       | 9-B  | 1000   | McF_6 | 0   | last   | wholeT_0.5  | J1:DiP, J1:OT, J5:DiP, J5:OT, S1:DiP, S1:OT, S5:DiP, S5:OT                                                                                                                                   |
| 616 | No          | 9       | 9-B  | 1000   | McF_6 | 0   | unif   | singleC     | J1:CBN, J1:CBN-A, J1:DiP, J1:DiP-A, J1:OT, J1:OT-A, J5:CBN, J5:CBN-A, J5:DiP, J5:DiP-A, J5:OT, J5:OT-A, S1:DiP, S1:DiP-A, S1:OT, S1:OT-A, S5:CBN, S5:CBN-A, S5:DiP, S5:DiP-A, S5:OT, S5:OT-A |

Table 8: (continued)

|     | Conjunction | Drivers | Tree | S.Size | Model | sh  | S.Time | S.Type      | Best method(s)                                                                                                                                                                               |
|-----|-------------|---------|------|--------|-------|-----|--------|-------------|----------------------------------------------------------------------------------------------------------------------------------------------------------------------------------------------|
| 617 | No          | 9       | 9-B  | 1000   | McF_6 | 0   | unif   | wholeT_0.01 | J1:CBN, J1:CBN-A, J1:DiP, J1:DiP-A, J1:OT, J1:OT-A, J5:CBN, J5:CBN-A, J5:DiP, J5:DiP-A, J5:OT, J5:OT-A, S1:DiP, S1:DiP-A, S5:CBN, S5:DiP, S5:DiP-A, S5:OT, S5:OT-A                           |
| 618 | No          | 9       | 9-B  | 1000   | McF_6 | 0   | unif   | wholeT_0.5  | J1:CBN, J1:CBN-A, J1:DiP, J1:DiP-A, J1:OT, J1:OT-A, J5:CBN, J5:CBN-A, J5:DiP, J5:DiP-A, J5:OT, J5:OT-A, S1:DiP, S1:DiP-A, S1:OT, S1:OT-A, S5:CBN, S5:CBN-A, S5:DiP, S5:DiP-A, S5:OT, S5:OT-A |
| 619 | No          | 9       | 9-B  | 1000   | McF_6 | Inf | last   | singleC     | J1:DiP, J1:OT, J5:DiP, J5:OT, S1:DiP, S5:DiP, S5:OT                                                                                                                                          |
| 620 | No          | 9       | 9-B  | 1000   | McF_6 | Inf | last   | wholeT_0.01 | J1:DiP, J1:OT, J5:DiP, J5:OT, S1:DiP, S5:DiP, S5:OT                                                                                                                                          |
| 621 | No          | 9       | 9-B  | 1000   | McF_6 | Inf | last   | wholeT_0.5  | J1:DiP, J1:OT, J5:DiP, J5:OT, S1:DiP, S1:OT, S5:DiP, S5:OT                                                                                                                                   |
| 622 | No          | 9       | 9-B  | 1000   | McF_6 | Inf | unif   | singleC     | J1:CBN, J1:CBN-A, J1:DiP, J1:DiP-A, J1:OT, J1:OT-A, J5:CBN-A, J5:DiP, J5:DiP-A, J5:OT, J5:OT-A, S1:DiP, S1:DiP-A, S1:OT, S1:OT-A, S5:CBN, S5:CBN-A, S5:DiP, S5:DiP-A, S5:OT, S5:OT-A         |
| 623 | No          | 9       | 9-B  | 1000   | McF_6 | Inf | unif   | wholeT_0.01 | J1:CBN, J1:CBN-A, J1:DiP, J1:DiP-A, J1:OT, J1:OT-A, J5:CBN-A, J5:DiP, J5:DiP-A, J5:OT, J5:OT-A, S1:DiP, S5:CBN, S5:DiP, S5:DiP-A, S5:OT, S5:OT-A                                             |
| 624 | No          | 9       | 9-B  | 1000   | McF_6 | Inf | unif   | wholeT_0.5  | J1:CBN, J1:CBN-A, J1:DiP, J1:DiP-A, J1:OT, J1:OT-A, J5:CBN-A, J5:DiP, J5:DiP-A, J5:OT, J5:OT-A, S1:DiP, S1:DiP-A, S1:OT, S1:OT-A, S5:CBN, S5:CBN-A, S5:DiP, S5:DiP-A, S5:OT, S5:OT-A         |
| 625 | No          | 9       | 9-B  | 200    | Bozic | 0   | last   | singleC     | J1:DiP, J1:DiP-A, J1:OT, J1:OT-A, J5:DiP, J5:DiP-A, J5:OT, J5:OT-A, S1:DiP, S1:DiP-A, S5:DiP, S5:DiP-A, S5:OT, S5:OT-A                                                                       |

Table 8: (continued)

|     | Conjunction | Drivers | Tree | S.Size | Model | sh  | S.Time | S.Type      | Best method(s)                                                                                                                                           |
|-----|-------------|---------|------|--------|-------|-----|--------|-------------|----------------------------------------------------------------------------------------------------------------------------------------------------------|
| 626 | No          | 9       | 9-B  | 200    | Bozic | 0   | last   | wholeT_0.01 | J1:CBN-A, J1:DiP, J1:DiP-A, J1:OT, J1:OT-A, J5:CBN-A, J5:DiP, J5:DiP-A, J5:OT, J5:OT-A, S1:DiP, S1:DiP-A, S5:CBN-A, S5:DiP, S5:DiP-A, S5:OT, S5:OT-A     |
| 627 | No          | 9       | 9-B  | 200    | Bozic | 0   | last   | wholeT_0.5  | J1:DiP, J1:DiP-A, J1:OT, J1:OT-A, J5:CBN, J5:CBN-A, J5:DiP, J5:DiP-A, J5:OT, J5:OT-A, S1:DiP, S1:DiP-A, S5:DiP, S5:DiP-A, S5:OT, S5:OT-A                 |
| 628 | No          | 9       | 9-B  | 200    | Bozic | 0   | unif   | singleC     | J1:DiP, J1:DiP-A, J1:OT, J1:OT-A, J5:CBN, J5:CBN-A, J5:DiP, J5:DiP-A, J5:OT, J5:OT-A, S1:DiP, S1:DiP-A, S5:DiP, S5:DiP-A, S5:OT, S5:OT-A                 |
| 629 | No          | 9       | 9-B  | 200    | Bozic | 0   | unif   | wholeT_0.01 | J1:DiP, J1:DiP-A, J1:OT, J1:OT-A, J5:DiP, J5:DiP-A, J5:OT, J5:OT-A, S5:DiP, S5:DiP-A, S5:OT, S5:OT-A                                                     |
| 630 | No          | 9       | 9-B  | 200    | Bozic | 0   | unif   | wholeT_0.5  | J1:DiP, J1:DiP-A, J1:OT, J1:OT-A, J5:CBN, J5:CBN-A, J5:DiP, J5:DiP-A, J5:OT, J5:OT-A, S1:DiP, S1:DiP-A, S1:OT, S1:OT-A, S5:DiP, S5:DiP-A, S5:OT, S5:OT-A |
| 631 | No          | 9       | 9-B  | 200    | Bozic | Inf | last   | singleC     | J1:DiP, J1:DiP-A, J5:DiP, J5:DiP-A, J5:OT, J5:OT-A, S1:DiP, S1:DiP-A, S5:DiP, S5:DiP-A, S5:OT, S5:OT-A                                                   |
| 632 | No          | 9       | 9-B  | 200    | Bozic | Inf | last   | wholeT_0.01 | J5:CBN-A, J5:DiP, J5:DiP-A, J5:OT, J5:OT-A                                                                                                               |
| 633 | No          | 9       | 9-B  | 200    | Bozic | Inf | last   | wholeT_0.5  | J1:DiP, J1:DiP-A, J1:OT, J1:OT-A, J5:DiP, J5:DiP-A, J5:OT, J5:OT-A, S1:DiP-A, S5:DiP, S5:DiP-A, S5:OT, S5:OT-A                                           |
| 634 | No          | 9       | 9-B  | 200    | Bozic | Inf | unif   | singleC     | J1:DiP, J1:DiP-A, J1:OT, J1:OT-A, J5:DiP, J5:DiP-A, J5:OT, J5:OT-A, S5:DiP, S5:DiP-A, S5:OT, S5:OT-A                                                     |
| 635 | No          | 9       | 9-B  | 200    | Bozic | Inf | unif   | wholeT_0.01 | J5:DiP, J5:DiP-A, J5:OT, J5:OT-A                                                                                                                         |
| 636 | No          | 9       | 9-B  | 200    | Bozic | Inf | unif   | wholeT_0.5  | J1:DiP, J1:DiP-A, J1:OT, J1:OT-A, J5:CBN, J5:DiP, J5:DiP-A, J5:OT, J5:OT-A, S5:DiP, S5:DiP-A, S5:OT, S5:OT-A                                             |

Table 8: (continued)

|     | Conjunction | Drivers | Tree | S.Size | Model | sh  | S.Time | S.Type      | Best method(s)                                                                                                                                                             |
|-----|-------------|---------|------|--------|-------|-----|--------|-------------|----------------------------------------------------------------------------------------------------------------------------------------------------------------------------|
| 637 | No          | 9       | 9-B  | 200    | exp   | 0   | last   | singleC     | J1:DiP, J1:DiP-A, J1:OT, J1:OT-A, J5:CBN, J5:CBN-A, J5:DiP, J5:DiP-A, J5:OT, J5:OT-A, S1:DiP, S1:DiP-A, S1:OT, S1:OT-A, S5:DiP, S5:DiP-A, S5:OT, S5:OT-A                   |
| 638 | No          | 9       | 9-B  | 200    | exp   | 0   | last   | wholeT_0.01 | J1:DiP, J1:DiP-A, J1:OT, J1:OT-A, J5:DiP, J5:DiP-A, J5:OT, J5:OT-A, S1:DiP, S1:DiP-A, S5:DiP, S5:DiP-A, S5:OT, S5:OT-A                                                     |
| 639 | No          | 9       | 9-B  | 200    | exp   | 0   | last   | wholeT_0.5  | J1:DiP, J1:DiP-A, J1:OT, J1:OT-A, J5:CBN, J5:CBN-A, J5:DiP, J5:DiP-A, J5:OT, J5:OT-A, S1:DiP, S1:DiP-A, S1:OT, S1:OT-A, S5:DiP, S5:DiP-A, S5:OT, S5:OT-A                   |
| 640 | No          | 9       | 9-B  | 200    | exp   | 0   | unif   | singleC     | J1:CBN, J1:CBN-A, J1:DiP, J1:DiP-A, J1:OT, J1:OT-A, J5:CBN, J5:CBN-A, J5:DiP, J5:DiP-A, J5:OT, J5:OT-A, S1:DiP, S1:DiP-A, S1:OT, S1:OT-A, S5:DiP, S5:DiP-A, S5:OT, S5:OT-A |
| 641 | No          | 9       | 9-B  | 200    | exp   | 0   | unif   | wholeT_0.01 | J1:DiP, J1:DiP-A, J1:OT, J1:OT-A, J5:CBN, J5:CBN-A, J5:DiP, J5:DiP-A, J5:OT, J5:OT-A, S1:DiP, S1:DiP-A, S1:OT, S1:OT-A, S5:DiP, S5:DiP-A, S5:OT, S5:OT-A                   |
| 642 | No          | 9       | 9-B  | 200    | exp   | 0   | unif   | wholeT_0.5  | J1:CBN, J1:CBN-A, J1:DiP, J1:DiP-A, J1:OT, J1:OT-A, J5:CBN, J5:CBN-A, J5:DiP, J5:DiP-A, J5:OT, J5:OT-A, S1:DiP, S1:DiP-A, S1:OT, S1:OT-A, S5:DiP, S5:DiP-A, S5:OT, S5:OT-A |
| 643 | No          | 9       | 9-B  | 200    | exp   | Inf | last   | singleC     | J1:DiP, J1:DiP-A, J1:OT, J1:OT-A, J5:DiP, J5:DiP-A, J5:OT, J5:OT-A, S1:DiP, S1:DiP-A, S5:DiP, S5:DiP-A, S5:OT, S5:OT-A                                                     |
| 644 | No          | 9       | 9-B  | 200    | exp   | Inf | last   | wholeT_0.01 | J5:CBN-A, J5:DiP, J5:DiP-A, J5:OT, J5:OT-A                                                                                                                                 |
| 645 | No          | 9       | 9-B  | 200    | exp   | Inf | last   | wholeT_0.5  | J1:DiP, J1:DiP-A, J1:OT, J1:OT-A, J5:DiP, J5:DiP-A, J5:OT, J5:OT-A, S1:DiP, S1:DiP-A, S5:DiP, S5:DiP-A, S5:OT, S5:OT-A                                                     |

Table 8: (continued)

|     | Conjunction | Drivers | Tree | S.Size | Model | sh  | S.Time | S.Type      | Best method(s)                                                                                                                                           |
|-----|-------------|---------|------|--------|-------|-----|--------|-------------|----------------------------------------------------------------------------------------------------------------------------------------------------------|
| 646 | No          | 9       | 9-B  | 200    | exp   | Inf | unif   | singleC     | J1:DiP, J1:DiP-A, J1:OT, J1:OT-A, J5:CBN, J5:CBN-A, J5:DiP, J5:DiP-A, J5:OT, J5:OT-A, S1:DiP, S1:DiP-A, S5:DiP, S5:DiP-A, S5:OT, S5:OT-A                 |
| 647 | No          | 9       | 9-B  | 200    | exp   | Inf | unif   | wholeT_0.01 | J5:DiP, J5:DiP-A, J5:OT, J5:OT-A, S5:DiP, S5:OT, S5:OT-A                                                                                                 |
| 648 | No          | 9       | 9-B  | 200    | exp   | Inf | unif   | wholeT_0.5  | J1:DiP, J1:DiP-A, J1:OT, J1:OT-A, J5:CBN, J5:CBN-A, J5:DiP, J5:DiP-A, J5:OT, J5:OT-A, S1:DiP, S1:DiP-A, S1:OT, S1:OT-A, S5:DiP, S5:DiP-A, S5:OT, S5:OT-A |
| 649 | No          | 9       | 9-B  | 200    | McF_4 | 0   | last   | singleC     | J1:DiP, J1:DiP-A, J1:OT, J1:OT-A, J5:DiP, J5:DiP-A, J5:OT, J5:OT-A, S5:DiP, S5:DiP-A, S5:OT, S5:OT-A                                                     |
| 650 | No          | 9       | 9-B  | 200    | McF_4 | 0   | last   | wholeT_0.01 | J1:DiP, J1:DiP-A, J1:OT, J1:OT-A, J5:DiP, J5:DiP-A, J5:OT, J5:OT-A, S1:DiP, S1:DiP-A, S5:DiP, S5:DiP-A, S5:OT, S5:OT-A                                   |
| 651 | No          | 9       | 9-B  | 200    | McF_4 | 0   | last   | wholeT_0.5  | J1:DiP, J1:DiP-A, J1:OT, J1:OT-A, J5:DiP, J5:DiP-A, J5:OT, J5:OT-A, S1:DiP-A, S5:DiP, S5:DiP-A, S5:OT, S5:OT-A                                           |
| 652 | No          | 9       | 9-B  | 200    | McF_4 | 0   | unif   | singleC     | J1:DiP, J1:DiP-A, J1:OT, J1:OT-A, J5:DiP, J5:DiP-A, J5:OT, J5:OT-A, S1:DiP, S1:DiP-A, S5:DiP, S5:DiP-A, S5:OT, S5:OT-A                                   |
| 653 | No          | 9       | 9-B  | 200    | McF_4 | 0   | unif   | wholeT_0.01 | J1:DiP, J1:DiP-A, J1:OT, J1:OT-A, J5:DiP, J5:DiP-A, J5:OT, J5:OT-A, S1:DiP, S1:DiP-A, S5:DiP, S5:DiP-A, S5:OT, S5:OT-A                                   |
| 654 | No          | 9       | 9-B  | 200    | McF_4 | 0   | unif   | wholeT_0.5  | J1:DiP, J1:DiP-A, J1:OT, J1:OT-A, J5:DiP, J5:DiP-A, J5:OT, J5:OT-A, S1:DiP, S1:DiP-A, S5:DiP, S5:DiP-A, S5:OT, S5:OT-A                                   |
| 655 | No          | 9       | 9-B  | 200    | McF_4 | Inf | last   | singleC     | J1:DiP, J1:DiP-A, J1:OT, J1:OT-A, J5:DiP, J5:DiP-A, J5:OT, J5:OT-A, S5:DiP, S5:DiP-A, S5:OT, S5:OT-A                                                     |
| 656 | No          | 9       | 9-B  | 200    | McF_4 | Inf | last   | wholeT_0.01 | J1:DiP, J1:DiP-A, J1:OT, J1:OT-A, J5:DiP, J5:DiP-A, J5:OT, J5:OT-A, S5:DiP, S5:DiP-A, S5:OT, S5:OT-A                                                     |

Table 8: (continued)

|     | Conjunction | Drivers | Tree | S.Size | Model | sh  | S.Time | S.Type      | Best method(s)                                                                                                                                                       |
|-----|-------------|---------|------|--------|-------|-----|--------|-------------|----------------------------------------------------------------------------------------------------------------------------------------------------------------------|
| 657 | No          | 9       | 9-B  | 200    | McF_4 | Inf | last   | wholeT_0.5  | J1:DiP, J1:DiP-A, J1:OT, J1:OT-A, J5:DiP, J5:DiP-A, J5:OT, J5:OT-A, S1:DiP, S1:DiP-A, S5:DiP, S5:DiP-A, S5:OT, S5:OT-A                                               |
| 658 | No          | 9       | 9-B  | 200    | McF_4 | Inf | unif   | singleC     | J1:DiP, J1:DiP-A, J1:OT, J1:OT-A, J5:DiP, J5:DiP-A, J5:OT, J5:OT-A, S1:DiP, S1:DiP-A, S5:DiP, S5:DiP-A, S5:OT, S5:OT-A                                               |
| 659 | No          | 9       | 9-B  | 200    | McF_4 | Inf | unif   | wholeT_0.01 | J1:DiP, J1:DiP-A, J1:OT, J1:OT-A, J5:DiP, J5:DiP-A, J5:OT, J5:OT-A, S5:DiP, S5:DiP-A, S5:OT, S5:OT-A                                                                 |
| 660 | No          | 9       | 9-B  | 200    | McF_4 | Inf | unif   | wholeT_0.5  | J1:DiP, J1:DiP-A, J1:OT, J1:OT-A, J5:DiP, J5:DiP-A, J5:OT, J5:OT-A, S1:DiP, S1:DiP-A, S5:DiP, S5:DiP-A, S5:OT, S5:OT-A                                               |
| 661 | No          | 9       | 9-B  | 200    | McF_6 | 0   | last   | singleC     | J1:DiP, J1:OT, J5:DiP, J5:OT, S1:DiP, S5:DiP, S5:OT                                                                                                                  |
| 662 | No          | 9       | 9-B  | 200    | McF_6 | 0   | last   | wholeT_0.01 | J1:DiP, J1:OT, J5:DiP, J5:OT, S1:DiP, S5:DiP, S5:OT                                                                                                                  |
| 663 | No          | 9       | 9-B  | 200    | McF_6 | 0   | last   | wholeT_0.5  | J1:DiP, J1:OT, J5:DiP, J5:OT, S1:DiP, S5:DiP, S5:OT                                                                                                                  |
| 664 | No          | 9       | 9-B  | 200    | McF_6 | 0   | unif   | singleC     | J1:CBN, J1:CBN-A, J1:DiP, J1:DiP-A, J1:OT, J1:OT-A, J5:CBN, J5:CBN-A, J5:DiP, J5:DiP-A, J5:OT, J5:OT-A, S1:DiP, S5:CBN, S5:CBN-A, S5:DiP, S5:DiP-A, S5:OT, S5:OT-A   |
| 665 | No          | 9       | 9-B  | 200    | McF_6 | 0   | unif   | wholeT_0.01 | J1:CBN, J1:CBN-A, J1:DiP, J1:DiP-A, J1:OT, J1:OT-A, J5:CBN, J5:CBN-A, J5:DiP, J5:DiP-A, J5:OT, J5:OT-A, S1:DiP, S1:DiP-A, S5:CBN-A, S5:DiP, S5:DiP-A, S5:OT, S5:OT-A |
| 666 | No          | 9       | 9-B  | 200    | McF_6 | 0   | unif   | wholeT_0.5  | J1:CBN, J1:CBN-A, J1:DiP, J1:DiP-A, J1:OT, J1:OT-A, J5:CBN-A, J5:DiP, J5:DiP-A, J5:OT, J5:OT-A, S1:DiP, S5:CBN-A, S5:DiP, S5:DiP-A, S5:OT, S5:OT-A                   |
| 667 | No          | 9       | 9-B  | 200    | McF_6 | Inf | last   | singleC     | J1:DiP, J1:OT, J5:DiP, J5:OT, S1:DiP, S5:DiP, S5:OT                                                                                                                  |
| 668 | No          | 9       | 9-B  | 200    | McF_6 | Inf | last   | wholeT_0.01 | J1:DiP, J1:OT, J5:DiP, J5:OT, S1:DiP, S5:DiP, S5:OT                                                                                                                  |



Table 8: (continued)

|     | Conjunction | Drivers | Tree | S.Size | Model | sh  | S.Time | S.Type      | Best method(s)                                                                                                                                     |
|-----|-------------|---------|------|--------|-------|-----|--------|-------------|----------------------------------------------------------------------------------------------------------------------------------------------------|
| 669 | No          | 9       | 9-B  | 200    | McF_6 | Inf | last   | wholeT_0.5  | J1:DiP, J1:OT, J5:DiP, J5:OT, S1:DiP, S5:DiP, S5:OT                                                                                                |
| 670 | No          | 9       | 9-B  | 200    | McF_6 | Inf | unif   | singleC     | J1:CBN, J1:CBN-A, J1:DiP, J1:DiP-A, J1:OT, J1:OT-A, J5:CBN-A, J5:DiP, J5:DiP-A, J5:OT, J5:OT-A, S1:DiP, S5:CBN, S5:DiP, S5:OT, S5:OT-A             |
| 671 | No          | 9       | 9-B  | 200    | McF_6 | Inf | unif   | wholeT_0.01 | J1:CBN, J1:CBN-A, J1:DiP, J1:OT, J1:OT-A, J5:CBN-A, J5:DiP, J5:DiP-A, J5:OT, J5:OT-A, S5:CBN, S5:OT, S5:OT-A                                       |
| 672 | No          | 9       | 9-B  | 200    | McF_6 | Inf | unif   | wholeT_0.5  | J1:CBN, J1:CBN-A, J1:DiP, J1:DiP-A, J1:OT, J1:OT-A, J5:CBN-A, J5:DiP, J5:DiP-A, J5:OT, J5:OT-A, S5:CBN, S5:CBN-A, S5:DiP, S5:DiP-A, S5:OT, S5:OT-A |
| 673 | No          | 9       | 9-B  | 100    | Bozic | 0   | last   | singleC     | J1:DiP, J1:DiP-A, J1:OT, J1:OT-A, J5:DiP, J5:DiP-A, J5:OT, J5:OT-A, S1:DiP, S1:DiP-A, S5:DiP, S5:DiP-A, S5:OT, S5:OT-A                             |
| 674 | No          | 9       | 9-B  | 100    | Bozic | 0   | last   | wholeT_0.01 | J1:DiP, J1:DiP-A, J1:OT, J1:OT-A, J5:CBN-A, J5:DiP, J5:DiP-A, J5:OT, J5:OT-A, S1:DiP, S1:DiP-A, S5:DiP, S5:DiP-A, S5:OT, S5:OT-A                   |
| 675 | No          | 9       | 9-B  | 100    | Bozic | 0   | last   | wholeT_0.5  | J1:DiP, J1:DiP-A, J1:OT, J1:OT-A, J5:DiP, J5:DiP-A, J5:OT, J5:OT-A, S1:DiP, S1:DiP-A, S5:DiP, S5:DiP-A, S5:OT, S5:OT-A                             |
| 676 | No          | 9       | 9-B  | 100    | Bozic | 0   | unif   | singleC     | J1:DiP, J1:DiP-A, J1:OT, J1:OT-A, J5:CBN, J5:CBN-A, J5:DiP, J5:DiP-A, J5:OT, J5:OT-A, S1:DiP, S1:DiP-A, S5:DiP, S5:DiP-A, S5:OT, S5:OT-A           |
| 677 | No          | 9       | 9-B  | 100    | Bozic | 0   | unif   | wholeT_0.01 | J1:DiP, J1:DiP-A, J5:DiP, J5:DiP-A, J5:OT, J5:OT-A, S1:DiP, S1:DiP-A, S5:DiP, S5:DiP-A, S5:OT, S5:OT-A                                             |
| 678 | No          | 9       | 9-B  | 100    | Bozic | 0   | unif   | wholeT_0.5  | J1:DiP, J1:DiP-A, J1:OT, J1:OT-A, J5:CBN, J5:CBN-A, J5:DiP, J5:DiP-A, J5:OT, J5:OT-A, S1:DiP, S1:DiP-A, S5:DiP, S5:DiP-A, S5:OT, S5:OT-A           |

Table 8: (continued)

|     | Conjunction | Drivers | Tree | S.Size | Model | sh  | S.Time | S.Type      | Best method(s)                                                                                                                                           |
|-----|-------------|---------|------|--------|-------|-----|--------|-------------|----------------------------------------------------------------------------------------------------------------------------------------------------------|
| 679 | No          | 9       | 9-B  | 100    | Bozic | Inf | last   | singleC     | J1:DiP, J1:DiP-A, J5:DiP, J5:DiP-A, J5:OT, J5:OT-A, S1:DiP, S1:DiP-A, S5:DiP, S5:DiP-A                                                                   |
| 680 | No          | 9       | 9-B  | 100    | Bozic | Inf | last   | wholeT_0.01 | J5:DiP, J5:DiP-A                                                                                                                                         |
| 681 | No          | 9       | 9-B  | 100    | Bozic | Inf | last   | wholeT_0.5  | J1:DiP, J1:DiP-A, J5:DiP, J5:DiP-A, J5:OT, J5:OT-A, S1:DiP, S1:DiP-A, S5:DiP, S5:DiP-A                                                                   |
| 682 | No          | 9       | 9-B  | 100    | Bozic | Inf | unif   | singleC     | J1:DiP, J1:DiP-A, J5:DiP, J5:DiP-A, J5:OT, J5:OT-A, S1:DiP, S1:DiP-A, S5:DiP, S5:DiP-A, S5:OT, S5:OT-A                                                   |
| 683 | No          | 9       | 9-B  | 100    | Bozic | Inf | unif   | wholeT_0.01 | J5:OT, J5:OT-A                                                                                                                                           |
| 684 | No          | 9       | 9-B  | 100    | Bozic | Inf | unif   | wholeT_0.5  | J1:DiP, J1:DiP-A, J5:DiP, J5:DiP-A, J5:OT, J5:OT-A, S1:DiP, S1:DiP-A, S5:DiP, S5:DiP-A, S5:OT, S5:OT-A                                                   |
| 685 | No          | 9       | 9-B  | 100    | exp   | 0   | last   | singleC     | J1:DiP, J1:DiP-A, J1:OT, J1:OT-A, J5:CBN, J5:CBN-A, J5:DiP, J5:DiP-A, J5:OT, J5:OT-A, S1:DiP, S1:DiP-A, S1:OT, S1:OT-A, S5:DiP, S5:DiP-A, S5:OT, S5:OT-A |
| 686 | No          | 9       | 9-B  | 100    | exp   | 0   | last   | wholeT_0.01 | J1:DiP, J1:DiP-A, J1:OT, J1:OT-A, J5:DiP, J5:DiP-A, J5:OT, J5:OT-A, S1:DiP, S1:DiP-A, S5:DiP, S5:DiP-A, S5:OT, S5:OT-A                                   |
| 687 | No          | 9       | 9-B  | 100    | exp   | 0   | last   | wholeT_0.5  | J1:DiP, J1:DiP-A, J1:OT, J1:OT-A, J5:CBN, J5:CBN-A, J5:DiP, J5:DiP-A, J5:OT, J5:OT-A, S1:DiP, S1:DiP-A, S1:OT, S1:OT-A, S5:DiP, S5:DiP-A, S5:OT, S5:OT-A |
| 688 | No          | 9       | 9-B  | 100    | exp   | 0   | unif   | singleC     | J1:DiP, J1:DiP-A, J1:OT, J1:OT-A, J5:CBN, J5:CBN-A, J5:DiP, J5:DiP-A, J5:OT, J5:OT-A, S1:DiP, S1:DiP-A, S1:OT, S1:OT-A, S5:DiP, S5:DiP-A, S5:OT, S5:OT-A |
| 689 | No          | 9       | 9-B  | 100    | exp   | 0   | unif   | wholeT_0.01 | J1:DiP, J1:DiP-A, J1:OT, J1:OT-A, J5:CBN, J5:CBN-A, J5:DiP, J5:DiP-A, J5:OT, J5:OT-A, S1:DiP, S1:DiP-A, S5:DiP, S5:DiP-A, S5:OT, S5:OT-A                 |

Table 8: (continued)

|     | Conjunction | Drivers | Tree | S.Size | Model | sh  | S.Time | S.Type      | Best method(s)                                                                                                                                           |
|-----|-------------|---------|------|--------|-------|-----|--------|-------------|----------------------------------------------------------------------------------------------------------------------------------------------------------|
| 690 | No          | 9       | 9-B  | 100    | exp   | 0   | unif   | wholeT_0.5  | J1:DiP, J1:DiP-A, J1:OT, J1:OT-A, J5:CBN, J5:CBN-A, J5:DiP, J5:DiP-A, J5:OT, J5:OT-A, S1:DiP, S1:DiP-A, S1:OT, S1:OT-A, S5:DiP, S5:DiP-A, S5:OT, S5:OT-A |
| 691 | No          | 9       | 9-B  | 100    | exp   | Inf | last   | singleC     | J1:DiP, J1:DiP-A, J5:DiP, J5:DiP-A, J5:OT, J5:OT-A, S1:DiP, S1:DiP-A, S5:DiP, S5:DiP-A, S5:OT, S5:OT-A                                                   |
| 692 | No          | 9       | 9-B  | 100    | exp   | Inf | last   | wholeT_0.01 | J5:DiP, J5:DiP-A, J5:OT, J5:OT-A                                                                                                                         |
| 693 | No          | 9       | 9-B  | 100    | exp   | Inf | last   | wholeT_0.5  | J1:DiP, J1:DiP-A, J5:DiP, J5:DiP-A, J5:OT, J5:OT-A, S1:DiP, S1:DiP-A, S5:DiP, S5:DiP-A, S5:OT, S5:OT-A                                                   |
| 694 | No          | 9       | 9-B  | 100    | exp   | Inf | unif   | singleC     | J1:DiP, J1:DiP-A, J1:OT, J1:OT-A, J5:CBN, J5:CBN-A, J5:DiP, J5:DiP-A, J5:OT, J5:OT-A, S1:DiP, S1:DiP-A, S5:DiP, S5:DiP-A, S5:OT, S5:OT-A                 |
| 695 | No          | 9       | 9-B  | 100    | exp   | Inf | unif   | wholeT_0.01 | J5:DiP, J5:DiP-A, J5:OT, J5:OT-A, S5:DiP, S5:DiP-A, S5:OT, S5:OT-A                                                                                       |
| 696 | No          | 9       | 9-B  | 100    | exp   | Inf | unif   | wholeT_0.5  | J1:DiP, J1:DiP-A, J1:OT, J1:OT-A, J5:CBN, J5:CBN-A, J5:DiP, J5:DiP-A, J5:OT, J5:OT-A, S1:DiP, S1:DiP-A, S5:DiP, S5:DiP-A, S5:OT, S5:OT-A                 |
| 697 | No          | 9       | 9-B  | 100    | McF_4 | 0   | last   | singleC     | J1:DiP, J1:DiP-A, J1:OT, J1:OT-A, J5:DiP, J5:DiP-A, J5:OT, J5:OT-A, S1:DiP, S1:DiP-A, S5:DiP, S5:DiP-A, S5:OT, S5:OT-A                                   |
| 698 | No          | 9       | 9-B  | 100    | McF_4 | 0   | last   | wholeT_0.01 | J1:DiP, J1:DiP-A, J5:DiP, J5:DiP-A, J5:OT, J5:OT-A, S1:DiP, S1:DiP-A, S5:DiP, S5:DiP-A, S5:OT, S5:OT-A                                                   |
| 699 | No          | 9       | 9-B  | 100    | McF_4 | 0   | last   | wholeT_0.5  | J1:DiP, J1:DiP-A, J1:OT, J1:OT-A, J5:DiP, J5:DiP-A, J5:OT, J5:OT-A, S1:DiP, S1:DiP-A, S5:DiP, S5:DiP-A, S5:OT, S5:OT-A                                   |
| 700 | No          | 9       | 9-B  | 100    | McF_4 | 0   | unif   | singleC     | J1:DiP, J1:DiP-A, J1:OT, J1:OT-A, J5:DiP, J5:DiP-A, J5:OT, J5:OT-A, S1:DiP, S1:DiP-A, S5:DiP, S5:DiP-A, S5:OT, S5:OT-A                                   |
| 701 | No          | 9       | 9-B  | 100    | McF_4 | 0   | unif   | wholeT_0.01 | J1:DiP, J1:DiP-A, J5:DiP, J5:DiP-A, J5:OT, J5:OT-A, S1:DiP, S1:DiP-A, S5:DiP, S5:DiP-A, S5:OT, S5:OT-A                                                   |

Table 8: (continued)

|     | Conjunction | Drivers | Tree | S.Size | Model | sh  | S.Time | S.Type      | Best method(s)                                                                                                                                               |
|-----|-------------|---------|------|--------|-------|-----|--------|-------------|--------------------------------------------------------------------------------------------------------------------------------------------------------------|
| 702 | No          | 9       | 9-B  | 100    | McF_4 | 0   | unif   | wholeT_0.5  | J1:DiP, J1:DiP-A, J1:OT, J1:OT-A, J5:DiP, J5:DiP-A, J5:OT, J5:OT-A, S1:DiP, S1:DiP-A, S5:DiP, S5:DiP-A, S5:OT, S5:OT-A                                       |
| 703 | No          | 9       | 9-B  | 100    | McF_4 | Inf | last   | singleC     | J1:DiP, J1:DiP-A, J1:OT, J1:OT-A, J5:DiP, J5:DiP-A, J5:OT, J5:OT-A, S1:DiP, S1:DiP-A, S5:DiP, S5:DiP-A, S5:OT, S5:OT-A                                       |
| 704 | No          | 9       | 9-B  | 100    | McF_4 | Inf | last   | wholeT_0.01 | J1:DiP, J1:DiP-A, J5:DiP, J5:DiP-A, J5:OT, J5:OT-A, S1:DiP, S1:DiP-A, S5:DiP, S5:DiP-A, S5:OT, S5:OT-A                                                       |
| 705 | No          | 9       | 9-B  | 100    | McF_4 | Inf | last   | wholeT_0.5  | J1:DiP, J1:DiP-A, J1:OT, J1:OT-A, J5:DiP, J5:DiP-A, J5:OT, J5:OT-A, S1:DiP, S1:DiP-A, S5:DiP, S5:DiP-A, S5:OT, S5:OT-A                                       |
| 706 | No          | 9       | 9-B  | 100    | McF_4 | Inf | unif   | singleC     | J1:DiP, J1:DiP-A, J1:OT, J1:OT-A, J5:DiP, J5:DiP-A, J5:OT, J5:OT-A, S1:DiP, S1:DiP-A, S5:DiP, S5:DiP-A, S5:OT, S5:OT-A                                       |
| 707 | No          | 9       | 9-B  | 100    | McF_4 | Inf | unif   | wholeT_0.01 | J1:DiP, J1:DiP-A, J5:DiP, J5:DiP-A, J5:OT, J5:OT-A, S5:DiP, S5:DiP-A, S5:OT, S5:OT-A                                                                         |
| 708 | No          | 9       | 9-B  | 100    | McF_4 | Inf | unif   | wholeT_0.5  | J1:DiP, J1:DiP-A, J1:OT, J1:OT-A, J5:DiP, J5:DiP-A, J5:OT, J5:OT-A, S1:DiP, S1:DiP-A, S5:DiP, S5:DiP-A, S5:OT, S5:OT-A                                       |
| 709 | No          | 9       | 9-B  | 100    | McF_6 | 0   | last   | singleC     | J1:DiP, J1:DiP-A, J1:OT, J5:DiP, J5:DiP-A, J5:OT, S1:DiP, S1:DiP-A, S5:DiP, S5:DiP-A, S5:OT                                                                  |
| 710 | No          | 9       | 9-B  | 100    | McF_6 | 0   | last   | wholeT_0.01 | J1:DiP, J5:DiP, J5:OT, S1:DiP, S5:DiP, S5:OT                                                                                                                 |
| 711 | No          | 9       | 9-B  | 100    | McF_6 | 0   | last   | wholeT_0.5  | J1:DiP, J1:DiP-A, J1:OT, J5:DiP, J5:DiP-A, J5:OT, S1:DiP, S5:DiP, S5:OT                                                                                      |
| 712 | No          | 9       | 9-B  | 100    | McF_6 | 0   | unif   | singleC     | J1:CBN, J1:CBN-A, J1:DiP, J1:DiP-A, J1:OT, J1:OT-A, J5:CBN-A, J5:DiP, J5:DiP-A, J5:OT, J5:OT-A, S1:DiP, S1:DiP-A, S5:CBN-A, S5:DiP, S5:DiP-A, S5:OT, S5:OT-A |

Table 8: (continued)

|     | Conjunction | Drivers | Tree | S.Size | Model | sh  | S.Time | S.Type      | Best method(s)                                                                                                                                                                             |
|-----|-------------|---------|------|--------|-------|-----|--------|-------------|--------------------------------------------------------------------------------------------------------------------------------------------------------------------------------------------|
| 713 | No          | 9       | 9-B  | 100    | McF_6 | 0   | unif   | wholeT_0.01 | J1:CBN, J1:CBN-A, J1:DiP, J1:DiP-A, J1:OT, J5:CBN-A, J5:DiP, J5:DiP-A, J5:OT, J5:OT-A, S1:DiP, S5:CBN, S5:DiP, S5:DiP-A, S5:OT, S5:OT-A                                                    |
| 714 | No          | 9       | 9-B  | 100    | McF_6 | 0   | unif   | wholeT_0.5  | J1:CBN, J1:CBN-A, J1:DiP, J1:DiP-A, J1:OT, J1:OT-A, J5:CBN-A, J5:DiP, J5:DiP-A, J5:OT, J5:OT-A, S1:DiP, S5:CBN, S5:CBN-A, S5:DiP, S5:OT, S5:OT-A                                           |
| 715 | No          | 9       | 9-B  | 100    | McF_6 | Inf | last   | singleC     | J1:DiP, J1:DiP-A, J1:OT, J5:DiP, J5:DiP-A, J5:OT, S1:DiP, S1:DiP-A, S5:DiP, S5:DiP-A, S5:OT                                                                                                |
| 716 | No          | 9       | 9-B  | 100    | McF_6 | Inf | last   | wholeT_0.01 | J1:DiP, J5:DiP, J5:OT, S1:DiP, S5:DiP, S5:OT                                                                                                                                               |
| 717 | No          | 9       | 9-B  | 100    | McF_6 | Inf | last   | wholeT_0.5  | J1:DiP, J1:DiP-A, J1:OT, J5:DiP, J5:DiP-A, J5:OT, S1:DiP, S1:DiP-A, S5:DiP, S5:DiP-A, S5:OT                                                                                                |
| 718 | No          | 9       | 9-B  | 100    | McF_6 | Inf | unif   | singleC     | J1:CBN, J1:CBN-A, J1:DiP, J1:DiP-A, J1:OT, J1:OT-A, J5:CBN-A, J5:DiP, J5:DiP-A, J5:OT, J5:OT-A, S1:DiP, S1:DiP-A, S5:CBN-A, S5:DiP, S5:DiP-A, S5:OT, S5:OT-A                               |
| 719 | No          | 9       | 9-B  | 100    | McF_6 | Inf | unif   | wholeT_0.01 | J1:DiP, J5:CBN, J5:CBN-A, J5:DiP, J5:DiP-A, J5:OT, J5:OT-A, S1:DiP, S5:CBN, S5:CBN-A, S5:DiP, S5:DiP-A, S5:OT, S5:OT-A                                                                     |
| 720 | No          | 9       | 9-B  | 100    | McF_6 | Inf | unif   | wholeT_0.5  | J1:CBN, J1:CBN-A, J1:DiP, J1:DiP-A, J1:OT, J1:OT-A, J5:CBN-A, J5:DiP, J5:DiP-A, J5:OT, J5:OT-A, S1:DiP, S5:CBN, S5:CBN-A, S5:DiP, S5:DiP-A, S5:OT, S5:OT-A                                 |
| 721 | No          | 7       | 7-B  | 1000   | Bozic | 0   | last   | singleC     | J1:CBN, J1:CBN-A, J1:DiP, J1:DiP-A, J1:OT, J1:OT-A, J5:CBN, J5:CBN-A, J5:DiP, J5:DiP-A, J5:OT, J5:OT-A, S1:CBN, S1:DiP, S1:DiP-A, S1:OT, S1:OT-A, S5:CBN, S5:DiP, S5:DiP-A, S5:OT, S5:OT-A |
| 722 | No          | 7       | 7-B  | 1000   | Bozic | 0   | last   | wholeT_0.01 | none                                                                                                                                                                                       |

Table 8: (continued)

|     | Conjunction | Drivers | Tree | S.Size | Model | sh  | S.Time | S.Type      | Best method(s)                                                                                                                                                                               |
|-----|-------------|---------|------|--------|-------|-----|--------|-------------|----------------------------------------------------------------------------------------------------------------------------------------------------------------------------------------------|
| 723 | No          | 7       | 7-B  | 1000   | Bozic | 0   | last   | wholeT_0.5  | J1:CBN, J1:CBN-A, J1:DiP, J1:DiP-A, J1:OT, J1:OT-A, J5:CBN, J5:CBN-A, J5:DiP, J5:DiP-A, J5:OT, J5:OT-A, S1:DiP, S1:DiP-A, S1:OT, S1:OT-A, S5:CBN, S5:CBN-A, S5:DiP, S5:DiP-A, S5:OT, S5:OT-A |
| 724 | No          | 7       | 7-B  | 1000   | Bozic | 0   | unif   | singleC     | none                                                                                                                                                                                         |
| 725 | No          | 7       | 7-B  | 1000   | Bozic | 0   | unif   | wholeT_0.01 | J5:CBN, J5:CBN-A, J5:DiP, J5:DiP-A, J5:OT, J5:OT-A                                                                                                                                           |
| 726 | No          | 7       | 7-B  | 1000   | Bozic | 0   | unif   | wholeT_0.5  | none                                                                                                                                                                                         |
| 727 | No          | 7       | 7-B  | 1000   | Bozic | Inf | last   | singleC     | J1:DiP, J1:DiP-A, J1:OT, J1:OT-A, J5:DiP, J5:DiP-A, J5:OT, J5:OT-A, S1:DiP-A, S5:DiP, S5:DiP-A, S5:OT, S5:OT-A                                                                               |
| 728 | No          | 7       | 7-B  | 1000   | Bozic | Inf | last   | wholeT_0.01 | J5:CBN, J5:CBN-A, J5:DiP, J5:DiP-A, J5:OT, J5:OT-A                                                                                                                                           |
| 729 | No          | 7       | 7-B  | 1000   | Bozic | Inf | last   | wholeT_0.5  | J1:DiP, J1:DiP-A, J1:OT, J1:OT-A, J5:CBN, J5:CBN-A, J5:DiP, J5:DiP-A, J5:OT, J5:OT-A, S5:DiP, S5:DiP-A, S5:OT, S5:OT-A                                                                       |
| 730 | No          | 7       | 7-B  | 1000   | Bozic | Inf | unif   | singleC     | J1:CBN, J1:CBN-A, J5:CBN, J5:CBN-A, J5:DiP, J5:DiP-A, J5:OT, J5:OT-A, S1:CBN, S1:CBN-A, S5:CBN, S5:CBN-A, S5:DiP, S5:DiP-A, S5:OT, S5:OT-A                                                   |
| 731 | No          | 7       | 7-B  | 1000   | Bozic | Inf | unif   | wholeT_0.01 | J5:CBN, J5:CBN-A, S5:CBN, S5:CBN-A                                                                                                                                                           |
| 732 | No          | 7       | 7-B  | 1000   | Bozic | Inf | unif   | wholeT_0.5  | J1:CBN, J1:CBN-A, J1:DiP, J1:DiP-A, J1:OT, J1:OT-A, J5:CBN, J5:CBN-A, J5:DiP, J5:DiP-A, J5:OT, J5:OT-A, S1:CBN, S1:CBN-A, S5:CBN, S5:CBN-A, S5:DiP, S5:DiP-A, S5:OT, S5:OT-A                 |
| 733 | No          | 7       | 7-B  | 1000   | exp   | 0   | last   | singleC     | J1:CBN, J1:CBN-A, J1:DiP, J1:DiP-A, J1:OT, J1:OT-A, J5:CBN, J5:CBN-A, J5:DiP, J5:DiP-A, J5:OT, J5:OT-A, S1:DiP, S1:DiP-A, S1:OT, S1:OT-A, S5:CBN, S5:CBN-A, S5:DiP, S5:DiP-A, S5:OT, S5:OT-A |
| 734 | No          | 7       | 7-B  | 1000   | exp   | 0   | last   | wholeT_0.01 | none                                                                                                                                                                                         |

Table 8: (continued)

|     | Conjunction | Drivers | Tree | S.Size | Model | sh  | S.Time | S.Type      | Best method(s)                                                                                                                                                                                 |
|-----|-------------|---------|------|--------|-------|-----|--------|-------------|------------------------------------------------------------------------------------------------------------------------------------------------------------------------------------------------|
| 735 | No          | 7       | 7-B  | 1000   | exp   | 0   | last   | wholeT_0.5  | J1:CBN, J1:CBN-A, J1:DiP, J1:DiP-A, J1:OT, J1:OT-A, J5:CBN, J5:CBN-A, J5:DiP, J5:DiP-A, J5:OT, J5:OT-A, S1:DiP, S1:DiP-A, S1:OT, S1:OT-A, S5:CBN, S5:CBN-A, S5:DiP, S5:DiP-A, S5:OT, S5:OT-A   |
| 736 | No          | 7       | 7-B  | 1000   | exp   | 0   | unif   | singleC     | none                                                                                                                                                                                           |
| 737 | No          | 7       | 7-B  | 1000   | exp   | 0   | unif   | wholeT_0.01 | J1:CBN, J1:CBN-A, J1:DiP, J1:DiP-A, J1:OT, J1:OT-A, J5:CBN, J5:CBN-A, J5:DiP, J5:DiP-A, J5:OT, J5:OT-A, S5:CBN, S5:CBN-A, S5:DiP, S5:DiP-A, S5:OT, S5:OT-A                                     |
| 738 | No          | 7       | 7-B  | 1000   | exp   | 0   | unif   | wholeT_0.5  | none                                                                                                                                                                                           |
| 739 | No          | 7       | 7-B  | 1000   | exp   | Inf | last   | singleC     | J1:DiP, J1:DiP-A, J1:OT, J1:OT-A, J5:CBN, J5:CBN-A, J5:DiP, J5:DiP-A, J5:OT, J5:OT-A, S1:DiP, S1:DiP-A, S1:OT, S1:OT-A, S5:DiP, S5:DiP-A, S5:OT, S5:OT-A                                       |
| 740 | No          | 7       | 7-B  | 1000   | exp   | Inf | last   | wholeT_0.01 | J1:CBN, J1:CBN-A, J1:DiP-A, J1:OT, J1:OT-A, J5:CBN, J5:CBN-A, J5:DiP, J5:DiP-A, J5:OT, J5:OT-A, S5:CBN, S5:CBN-A, S5:OT, S5:OT-A                                                               |
| 741 | No          | 7       | 7-B  | 1000   | exp   | Inf | last   | wholeT_0.5  | J1:CBN, J1:DiP, J1:DiP-A, J1:OT, J1:OT-A, J5:CBN, J5:CBN-A, J5:DiP, J5:DiP-A, J5:OT, J5:OT-A, S1:DiP, S1:DiP-A, S1:OT, S1:OT-A, S5:DiP, S5:DiP-A, S5:OT, S5:OT-A                               |
| 742 | No          | 7       | 7-B  | 1000   | exp   | Inf | unif   | singleC     | J1:CBN, J1:CBN-A, J1:DiP, J1:DiP-A, J1:OT, J1:OT-A, J5:CBN, J5:CBN-A, J5:DiP, J5:DiP-A, J5:OT, J5:OT-A, S1:CBN, S1:CBN-A, S1:DiP, S1:DiP-A, S5:CBN, S5:CBN-A, S5:DiP, S5:DiP-A, S5:OT, S5:OT-A |
| 743 | No          | 7       | 7-B  | 1000   | exp   | Inf | unif   | wholeT_0.01 | J1:CBN, J1:CBN-A, J5:CBN, J5:CBN-A, J5:DiP-A, S5:CBN, S5:CBN-A                                                                                                                                 |

Table 8: (continued)

|     | Conjunction | Drivers | Tree | S.Size | Model | sh  | S.Time | S.Type      | Best method(s)                                                                                                                                                                                 |
|-----|-------------|---------|------|--------|-------|-----|--------|-------------|------------------------------------------------------------------------------------------------------------------------------------------------------------------------------------------------|
| 744 | No          | 7       | 7-B  | 1000   | exp   | Inf | unif   | wholeT_0.5  | J1:CBN, J1:CBN-A, J1:DiP, J1:DiP-A, J1:OT, J1:OT-A, J5:CBN, J5:CBN-A, J5:DiP, J5:DiP-A, J5:OT, J5:OT-A, S1:CBN, S1:CBN-A, S1:DiP, S1:DiP-A, S5:CBN, S5:CBN-A, S5:DiP, S5:DiP-A, S5:OT, S5:OT-A |
| 745 | No          | 7       | 7-B  | 1000   | McF_4 | 0   | last   | singleC     | J1:DiP, J1:DiP-A, J1:OT, J1:OT-A, J5:DiP, J5:DiP-A, J5:OT, J5:OT-A, S1:DiP, S1:DiP-A, S1:OT, S1:OT-A, S5:DiP, S5:DiP-A, S5:OT, S5:OT-A                                                         |
| 746 | No          | 7       | 7-B  | 1000   | McF_4 | 0   | last   | wholeT_0.01 | J1:CBN-A, J1:DiP, J1:DiP-A, J1:OT, J1:OT-A, J5:CBN-A, J5:DiP, J5:DiP-A, J5:OT, J5:OT-A, S1:DiP, S1:DiP-A, S5:DiP, S5:DiP-A, S5:OT, S5:OT-A                                                     |
| 747 | No          | 7       | 7-B  | 1000   | McF_4 | 0   | last   | wholeT_0.5  | J1:DiP, J1:DiP-A, J1:OT, J1:OT-A, J5:DiP, J5:DiP-A, J5:OT, J5:OT-A, S1:DiP, S1:DiP-A, S1:OT, S1:OT-A, S5:DiP, S5:DiP-A, S5:OT, S5:OT-A                                                         |
| 748 | No          | 7       | 7-B  | 1000   | McF_4 | 0   | unif   | singleC     | J1:CBN, J1:CBN-A, J1:DiP, J1:DiP-A, J1:OT, J1:OT-A, J5:CBN, J5:CBN-A, J5:DiP, J5:DiP-A, J5:OT, J5:OT-A, S1:DiP, S1:DiP-A, S1:OT, S1:OT-A, S5:CBN, S5:CBN-A, S5:DiP, S5:DiP-A, S5:OT, S5:OT-A   |
| 749 | No          | 7       | 7-B  | 1000   | McF_4 | 0   | unif   | wholeT_0.01 | J1:CBN, J1:CBN-A, J1:DiP, J1:DiP-A, J1:OT, J1:OT-A, J5:CBN, J5:CBN-A, J5:DiP, J5:DiP-A, J5:OT, J5:OT-A, S1:DiP, S1:DiP-A, S5:CBN, S5:CBN-A, S5:DiP, S5:DiP-A, S5:OT, S5:OT-A                   |
| 750 | No          | 7       | 7-B  | 1000   | McF_4 | 0   | unif   | wholeT_0.5  | J1:CBN, J1:CBN-A, J1:DiP, J1:DiP-A, J1:OT, J1:OT-A, J5:CBN, J5:CBN-A, J5:DiP, J5:DiP-A, J5:OT, J5:OT-A, S1:DiP, S1:DiP-A, S1:OT, S1:OT-A, S5:CBN, S5:CBN-A, S5:DiP, S5:DiP-A, S5:OT, S5:OT-A   |
| 751 | No          | 7       | 7-B  | 1000   | McF_4 | Inf | last   | singleC     | J1:DiP, J1:DiP-A, J1:OT, J1:OT-A, J5:DiP, J5:DiP-A, J5:OT, J5:OT-A, S1:DiP, S1:DiP-A, S1:OT, S1:OT-A, S5:DiP, S5:DiP-A, S5:OT, S5:OT-A                                                         |



Table 8: (continued)

|     | Conjunction | Drivers | Tree | S.Size | Model | sh  | S.Time | S.Type      | Best method(s)                                                                                                                                                                               |
|-----|-------------|---------|------|--------|-------|-----|--------|-------------|----------------------------------------------------------------------------------------------------------------------------------------------------------------------------------------------|
| 752 | No          | 7       | 7-B  | 1000   | McF_4 | Inf | last   | wholeT_0.01 | J1:DiP, J1:DiP-A, J1:OT, J1:OT-A, J5:DiP, J5:DiP-A, J5:OT, J5:OT-A, S1:DiP, S1:DiP-A, S5:DiP, S5:DiP-A, S5:OT, S5:OT-A                                                                       |
| 753 | No          | 7       | 7-B  | 1000   | McF_4 | Inf | last   | wholeT_0.5  | J1:DiP, J1:DiP-A, J1:OT, J1:OT-A, J5:DiP, J5:DiP-A, J5:OT, J5:OT-A, S1:DiP, S1:DiP-A, S1:OT, S1:OT-A, S5:DiP, S5:DiP-A, S5:OT, S5:OT-A                                                       |
| 754 | No          | 7       | 7-B  | 1000   | McF_4 | Inf | unif   | singleC     | J1:CBN, J1:CBN-A, J1:DiP, J1:DiP-A, J1:OT, J1:OT-A, J5:CBN, J5:CBN-A, J5:DiP, J5:DiP-A, J5:OT, J5:OT-A, S1:DiP, S1:DiP-A, S1:OT, S1:OT-A, S5:CBN, S5:CBN-A, S5:DiP, S5:DiP-A, S5:OT, S5:OT-A |
| 755 | No          | 7       | 7-B  | 1000   | McF_4 | Inf | unif   | wholeT_0.01 | J1:CBN, J1:CBN-A, J1:DiP, J1:DiP-A, J1:OT, J1:OT-A, J5:CBN, J5:CBN-A, J5:DiP, J5:DiP-A, J5:OT, J5:OT-A, S1:DiP, S1:DiP-A, S5:CBN, S5:CBN-A, S5:DiP, S5:DiP-A, S5:OT, S5:OT-A                 |
| 756 | No          | 7       | 7-B  | 1000   | McF_4 | Inf | unif   | wholeT_0.5  | J1:CBN, J1:CBN-A, J1:DiP, J1:DiP-A, J1:OT, J1:OT-A, J5:CBN, J5:CBN-A, J5:DiP, J5:DiP-A, J5:OT, J5:OT-A, S1:DiP, S1:DiP-A, S1:OT, S1:OT-A, S5:CBN, S5:CBN-A, S5:DiP, S5:DiP-A, S5:OT, S5:OT-A |
| 757 | No          | 7       | 7-B  | 1000   | McF_6 | 0   | last   | singleC     | J1:DiP, J1:DiP-A, J1:OT, J1:OT-A, J5:DiP, J5:DiP-A, J5:OT, J5:OT-A, S1:DiP, S1:DiP-A, S5:DiP, S5:DiP-A, S5:OT, S5:OT-A                                                                       |
| 758 | No          | 7       | 7-B  | 1000   | McF_6 | 0   | last   | wholeT_0.01 | J1:DiP, J1:DiP-A, J5:DiP, J5:DiP-A, J5:OT, J5:OT-A, S1:DiP, S1:DiP-A, S5:DiP, S5:DiP-A, S5:OT, S5:OT-A                                                                                       |
| 759 | No          | 7       | 7-B  | 1000   | McF_6 | 0   | last   | wholeT_0.5  | J1:DiP, J1:DiP-A, J1:OT, J1:OT-A, J5:DiP, J5:DiP-A, J5:OT, J5:OT-A, S1:DiP, S1:DiP-A, S1:OT, S1:OT-A, S5:DiP, S5:DiP-A, S5:OT, S5:OT-A                                                       |
| 760 | No          | 7       | 7-B  | 1000   | McF_6 | 0   | unif   | singleC     | none                                                                                                                                                                                         |

Table 8: (continued)

|     | Conjunction | Drivers | Tree | S.Size | Model | sh  | S.Time | S.Type      | Best method(s)                                                                                                                                                                      |
|-----|-------------|---------|------|--------|-------|-----|--------|-------------|-------------------------------------------------------------------------------------------------------------------------------------------------------------------------------------|
| 761 | No          | 7       | 7-B  | 1000   | McF_6 | 0   | unif   | wholeT_0.01 | J1:CBN, J1:CBN-A, J1:DiP, J1:DiP-A, J1:OT, J1:OT-A, J5:CBN, J5:CBN-A, J5:DiP, J5:DiP-A, J5:OT, J5:OT-A, S1:DiP, S5:CBN, S5:CBN-A, S5:DiP, S5:DiP-A, S5:OT, S5:OT-A                  |
| 762 | No          | 7       | 7-B  | 1000   | McF_6 | 0   | unif   | wholeT_0.5  | none                                                                                                                                                                                |
| 763 | No          | 7       | 7-B  | 1000   | McF_6 | Inf | last   | singleC     | J1:DiP, J1:DiP-A, J1:OT, J1:OT-A, J5:DiP, J5:DiP-A, J5:OT, J5:OT-A, S1:DiP, S1:DiP-A, S5:DiP, S5:DiP-A, S5:OT, S5:OT-A                                                              |
| 764 | No          | 7       | 7-B  | 1000   | McF_6 | Inf | last   | wholeT_0.01 | J1:DiP, J1:DiP-A, J5:DiP, J5:DiP-A, J5:OT, J5:OT-A, S1:DiP, S1:DiP-A, S5:DiP, S5:DiP-A, S5:OT, S5:OT-A                                                                              |
| 765 | No          | 7       | 7-B  | 1000   | McF_6 | Inf | last   | wholeT_0.5  | J1:DiP, J1:DiP-A, J1:OT, J1:OT-A, J5:DiP, J5:DiP-A, J5:OT, J5:OT-A, S1:DiP, S1:DiP-A, S5:DiP, S5:DiP-A, S5:OT, S5:OT-A                                                              |
| 766 | No          | 7       | 7-B  | 1000   | McF_6 | Inf | unif   | singleC     | none                                                                                                                                                                                |
| 767 | No          | 7       | 7-B  | 1000   | McF_6 | Inf | unif   | wholeT_0.01 | J1:CBN, J1:CBN-A, J1:DiP, J1:DiP-A, J1:OT, J1:OT-A, J5:CBN, J5:CBN-A, J5:DiP, J5:DiP-A, J5:OT, J5:OT-A, S5:CBN, S5:CBN-A, S5:DiP, S5:DiP-A, S5:OT, S5:OT-A                          |
| 768 | No          | 7       | 7-B  | 1000   | McF_6 | Inf | unif   | wholeT_0.5  | none                                                                                                                                                                                |
| 769 | No          | 7       | 7-B  | 200    | Bozic | 0   | last   | singleC     | J1:CBN, J1:CBN-A, J1:DiP, J1:DiP-A, J1:OT, J1:OT-A, J5:CBN, J5:CBN-A, J5:DiP, J5:DiP-A, J5:OT, J5:OT-A, S1:DiP, S1:DiP-A, S5:CBN, S5:DiP, S5:DiP-A, S5:OT, S5:OT-A                  |
| 770 | No          | 7       | 7-B  | 200    | Bozic | 0   | last   | wholeT_0.01 | J1:CBN, J1:CBN-A, J1:DiP, J1:DiP-A, J1:OT, J1:OT-A, J5:CBN, J5:CBN-A, J5:DiP, J5:DiP-A, J5:OT, J5:OT-A, S1:DiP, S1:DiP-A, S5:CBN, S5:CBN-A, S5:DiP, S5:DiP-A, S5:OT, S5:OT-A        |
| 771 | No          | 7       | 7-B  | 200    | Bozic | 0   | last   | wholeT_0.5  | J1:CBN, J1:CBN-A, J1:DiP, J1:DiP-A, J1:OT, J1:OT-A, J5:CBN, J5:CBN-A, J5:DiP, J5:DiP-A, J5:OT, J5:OT-A, S1:DiP, S1:DiP-A, S1:OT, S5:CBN, S5:CBN-A, S5:DiP, S5:DiP-A, S5:OT, S5:OT-A |

Table 8: (continued)

|     | Conjunction | Drivers | Tree | S.Size | Model | sh  | S.Time | S.Type      | Best method(s)                                                                                                                                                                               |
|-----|-------------|---------|------|--------|-------|-----|--------|-------------|----------------------------------------------------------------------------------------------------------------------------------------------------------------------------------------------|
| 772 | No          | 7       | 7-B  | 200    | Bozic | 0   | unif   | singleC     | J1:CBN, J1:CBN-A, J1:DiP, J1:DiP-A, J1:OT, J1:OT-A, J5:CBN, J5:CBN-A, J5:DiP, J5:DiP-A, J5:OT, J5:OT-A, S1:DiP, S1:DiP-A, S1:OT, S1:OT-A, S5:CBN, S5:CBN-A, S5:DiP, S5:DiP-A, S5:OT, S5:OT-A |
| 773 | No          | 7       | 7-B  | 200    | Bozic | 0   | unif   | wholeT_0.01 | J5:CBN, J5:CBN-A, J5:DiP, J5:DiP-A, J5:OT, J5:OT-A                                                                                                                                           |
| 774 | No          | 7       | 7-B  | 200    | Bozic | 0   | unif   | wholeT_0.5  | none                                                                                                                                                                                         |
| 775 | No          | 7       | 7-B  | 200    | Bozic | Inf | last   | singleC     | J1:DiP, J1:DiP-A, J5:CBN, J5:CBN-A, J5:DiP, J5:DiP-A, J5:OT, J5:OT-A, S1:DiP, S5:DiP, S5:DiP-A, S5:OT, S5:OT-A                                                                               |
| 776 | No          | 7       | 7-B  | 200    | Bozic | Inf | last   | wholeT_0.01 | J5:CBN, J5:CBN-A, J5:OT, J5:OT-A                                                                                                                                                             |
| 777 | No          | 7       | 7-B  | 200    | Bozic | Inf | last   | wholeT_0.5  | J1:DiP, J1:DiP-A, J1:OT, J1:OT-A, J5:CBN, J5:CBN-A, J5:DiP, J5:DiP-A, J5:OT, J5:OT-A, S1:DiP, S5:DiP, S5:DiP-A, S5:OT, S5:OT-A                                                               |
| 778 | No          | 7       | 7-B  | 200    | Bozic | Inf | unif   | singleC     | J1:CBN, J1:CBN-A, J5:CBN, J5:CBN-A, J5:DiP, J5:DiP-A, J5:OT, J5:OT-A, S5:CBN, S5:CBN-A, S5:DiP, S5:DiP-A, S5:OT, S5:OT-A                                                                     |
| 779 | No          | 7       | 7-B  | 200    | Bozic | Inf | unif   | wholeT_0.01 | J5:CBN, J5:CBN-A, J5:OT, J5:OT-A, S5:CBN, S5:CBN-A, S5:OT, S5:OT-A                                                                                                                           |
| 780 | No          | 7       | 7-B  | 200    | Bozic | Inf | unif   | wholeT_0.5  | J1:CBN, J1:CBN-A, J1:DiP, J1:DiP-A, J5:CBN, J5:CBN-A, J5:DiP, J5:DiP-A, J5:OT, J5:OT-A, S5:CBN, S5:CBN-A, S5:DiP, S5:DiP-A, S5:OT, S5:OT-A                                                   |
| 781 | No          | 7       | 7-B  | 200    | exp   | 0   | last   | singleC     | J1:CBN, J1:CBN-A, J1:DiP, J1:DiP-A, J1:OT, J1:OT-A, J5:CBN, J5:CBN-A, J5:DiP, J5:DiP-A, J5:OT, J5:OT-A, S1:DiP, S1:DiP-A, S1:OT, S1:OT-A, S5:CBN, S5:CBN-A, S5:DiP, S5:DiP-A, S5:OT, S5:OT-A |
| 782 | No          | 7       | 7-B  | 200    | exp   | 0   | last   | wholeT_0.01 | J1:CBN, J1:CBN-A, J1:DiP, J1:DiP-A, J1:OT, J1:OT-A, J5:CBN, J5:CBN-A, J5:DiP, J5:DiP-A, J5:OT, J5:OT-A, S1:CBN, S1:CBN-A, S1:DiP, S1:DiP-A, S5:CBN, S5:CBN-A, S5:DiP, S5:DiP-A               |
| 783 | No          | 7       | 7-B  | 200    | exp   | 0   | last   | wholeT_0.5  | none                                                                                                                                                                                         |

Table 8: (continued)

|     | Conjunction | Drivers | Tree | S.Size | Model | sh  | S.Time | S.Type      | Best method(s)                                                                                                                                                                                 |
|-----|-------------|---------|------|--------|-------|-----|--------|-------------|------------------------------------------------------------------------------------------------------------------------------------------------------------------------------------------------|
| 784 | No          | 7       | 7-B  | 200    | exp   | 0   | unif   | singleC     | none                                                                                                                                                                                           |
| 785 | No          | 7       | 7-B  | 200    | exp   | 0   | unif   | wholeT_0.01 | J1:CBN, J1:CBN-A, J1:DiP, J1:DiP-A, J1:OT, J1:OT-A, J5:CBN, J5:CBN-A, J5:DiP, J5:DiP-A, J5:OT, J5:OT-A, S1:DiP, S1:DiP-A, S5:CBN, S5:CBN-A, S5:DiP, S5:DiP-A, S5:OT, S5:OT-A                   |
| 786 | No          | 7       | 7-B  | 200    | exp   | 0   | unif   | wholeT_0.5  | none                                                                                                                                                                                           |
| 787 | No          | 7       | 7-B  | 200    | exp   | Inf | last   | singleC     | J1:DiP, J1:DiP-A, J1:OT, J1:OT-A, J5:CBN, J5:CBN-A, J5:DiP, J5:DiP-A, J5:OT, J5:OT-A, S1:DiP, S1:DiP-A, S5:DiP, S5:DiP-A, S5:OT, S5:OT-A                                                       |
| 788 | No          | 7       | 7-B  | 200    | exp   | Inf | last   | wholeT_0.01 | J1:DiP, J5:CBN, J5:CBN-A, J5:DiP, J5:DiP-A, J5:OT, J5:OT-A, S5:DiP                                                                                                                             |
| 789 | No          | 7       | 7-B  | 200    | exp   | Inf | last   | wholeT_0.5  | J1:CBN, J1:DiP, J1:DiP-A, J1:OT, J1:OT-A, J5:CBN, J5:CBN-A, J5:DiP, J5:DiP-A, J5:OT, J5:OT-A, S1:DiP, S1:DiP-A, S5:DiP, S5:DiP-A, S5:OT, S5:OT-A                                               |
| 790 | No          | 7       | 7-B  | 200    | exp   | Inf | unif   | singleC     | J1:CBN, J1:CBN-A, J1:DiP, J1:DiP-A, J1:OT, J1:OT-A, J5:CBN, J5:CBN-A, J5:DiP, J5:DiP-A, J5:OT, J5:OT-A, S1:DiP, S1:DiP-A, S5:CBN, S5:CBN-A, S5:DiP, S5:DiP-A, S5:OT, S5:OT-A                   |
| 791 | No          | 7       | 7-B  | 200    | exp   | Inf | unif   | wholeT_0.01 | J5:CBN, J5:CBN-A, J5:DiP, J5:DiP-A, J5:OT, J5:OT-A, S5:CBN, S5:CBN-A, S5:OT, S5:OT-A                                                                                                           |
| 792 | No          | 7       | 7-B  | 200    | exp   | Inf | unif   | wholeT_0.5  | J1:CBN, J1:CBN-A, J1:DiP, J1:DiP-A, J1:OT, J1:OT-A, J5:CBN, J5:CBN-A, J5:DiP, J5:DiP-A, J5:OT, J5:OT-A, S1:CBN, S1:CBN-A, S1:DiP, S1:DiP-A, S5:CBN, S5:CBN-A, S5:DiP, S5:DiP-A, S5:OT, S5:OT-A |
| 793 | No          | 7       | 7-B  | 200    | McF_4 | 0   | last   | singleC     | J1:DiP, J1:DiP-A, J1:OT, J1:OT-A, J5:DiP, J5:DiP-A, J5:OT, J5:OT-A, S1:DiP, S1:DiP-A, S5:DiP, S5:DiP-A, S5:OT, S5:OT-A                                                                         |
| 794 | No          | 7       | 7-B  | 200    | McF_4 | 0   | last   | wholeT_0.01 | J1:DiP, J1:DiP-A, J1:OT, J1:OT-A, J5:CBN-A, J5:DiP, J5:DiP-A, J5:OT, J5:OT-A, S1:DiP, S1:DiP-A, S5:DiP, S5:DiP-A, S5:OT, S5:OT-A                                                               |

Table 8: (continued)

|     | Conjunction | Drivers | Tree | S.Size | Model | sh  | S.Time | S.Type      | Best method(s)                                                                                                                                                               |
|-----|-------------|---------|------|--------|-------|-----|--------|-------------|------------------------------------------------------------------------------------------------------------------------------------------------------------------------------|
| 795 | No          | 7       | 7-B  | 200    | McF_4 | 0   | last   | wholeT_0.5  | J1:DiP, J1:DiP-A, J1:OT, J1:OT-A, J5:DiP, J5:DiP-A, J5:OT, J5:OT-A, S1:DiP, S1:DiP-A, S5:DiP, S5:DiP-A, S5:OT, S5:OT-A                                                       |
| 796 | No          | 7       | 7-B  | 200    | McF_4 | 0   | unif   | singleC     | J1:CBN, J1:CBN-A, J1:DiP, J1:DiP-A, J1:OT, J1:OT-A, J5:CBN, J5:CBN-A, J5:DiP, J5:DiP-A, J5:OT, J5:OT-A, S1:DiP, S1:DiP-A, S5:CBN, S5:CBN-A, S5:DiP, S5:DiP-A, S5:OT, S5:OT-A |
| 797 | No          | 7       | 7-B  | 200    | McF_4 | 0   | unif   | wholeT_0.01 | J1:CBN, J1:CBN-A, J1:DiP, J1:DiP-A, J1:OT, J1:OT-A, J5:CBN, J5:CBN-A, J5:DiP, J5:DiP-A, J5:OT, J5:OT-A, S5:CBN, S5:CBN-A, S5:DiP, S5:DiP-A, S5:OT, S5:OT-A                   |
| 798 | No          | 7       | 7-B  | 200    | McF_4 | 0   | unif   | wholeT_0.5  | J1:CBN, J1:CBN-A, J1:DiP, J1:DiP-A, J1:OT, J1:OT-A, J5:CBN, J5:CBN-A, J5:DiP, J5:DiP-A, J5:OT, J5:OT-A, S1:DiP, S1:DiP-A, S5:CBN, S5:CBN-A, S5:DiP, S5:DiP-A, S5:OT, S5:OT-A |
| 799 | No          | 7       | 7-B  | 200    | McF_4 | Inf | last   | singleC     | J1:DiP, J1:DiP-A, J1:OT, J1:OT-A, J5:DiP, J5:DiP-A, J5:OT, J5:OT-A, S1:DiP, S1:DiP-A, S5:DiP, S5:DiP-A, S5:OT, S5:OT-A                                                       |
| 800 | No          | 7       | 7-B  | 200    | McF_4 | Inf | last   | wholeT_0.01 | J1:DiP, J1:DiP-A, J1:OT, J1:OT-A, J5:DiP, J5:DiP-A, J5:OT, J5:OT-A, S1:DiP, S1:DiP-A, S5:DiP, S5:DiP-A, S5:OT, S5:OT-A                                                       |
| 801 | No          | 7       | 7-B  | 200    | McF_4 | Inf | last   | wholeT_0.5  | J1:DiP, J1:DiP-A, J1:OT, J1:OT-A, J5:DiP, J5:DiP-A, J5:OT, J5:OT-A, S1:DiP, S1:DiP-A, S5:DiP, S5:DiP-A, S5:OT, S5:OT-A                                                       |
| 802 | No          | 7       | 7-B  | 200    | McF_4 | Inf | unif   | singleC     | J1:CBN, J1:CBN-A, J1:DiP, J1:DiP-A, J1:OT, J1:OT-A, J5:CBN, J5:CBN-A, J5:DiP, J5:DiP-A, J5:OT, J5:OT-A, S1:DiP, S1:DiP-A, S5:CBN, S5:CBN-A, S5:DiP, S5:DiP-A, S5:OT, S5:OT-A |

Table 8: (continued)

|     | Conjunction | Drivers | Tree | S.Size | Model | sh  | S.Time | S.Type      | Best method(s)                                                                                                                                                               |
|-----|-------------|---------|------|--------|-------|-----|--------|-------------|------------------------------------------------------------------------------------------------------------------------------------------------------------------------------|
| 803 | No          | 7       | 7-B  | 200    | McF_4 | Inf | unif   | wholeT_0.01 | J1:CBN, J1:CBN-A, J1:DiP, J1:DiP-A, J1:OT, J1:OT-A, J5:CBN, J5:CBN-A, J5:DiP, J5:DiP-A, J5:OT, J5:OT-A, S1:DiP, S1:DiP-A, S5:CBN, S5:CBN-A, S5:DiP, S5:DiP-A, S5:OT, S5:OT-A |
| 804 | No          | 7       | 7-B  | 200    | McF_4 | Inf | unif   | wholeT_0.5  | J1:CBN, J1:CBN-A, J1:DiP, J1:DiP-A, J1:OT, J1:OT-A, J5:CBN, J5:CBN-A, J5:DiP, J5:DiP-A, J5:OT, J5:OT-A, S1:DiP, S1:DiP-A, S5:CBN, S5:CBN-A, S5:DiP, S5:DiP-A, S5:OT, S5:OT-A |
| 805 | No          | 7       | 7-B  | 200    | McF_6 | 0   | last   | singleC     | J1:DiP, J1:DiP-A, J1:OT, J1:OT-A, J5:DiP, J5:DiP-A, J5:OT, J5:OT-A, S1:DiP, S1:DiP-A, S5:DiP, S5:DiP-A, S5:OT, S5:OT-A                                                       |
| 806 | No          | 7       | 7-B  | 200    | McF_6 | 0   | last   | wholeT_0.01 | J1:DiP, J1:DiP-A, J5:DiP, J5:DiP-A, J5:OT, J5:OT-A, S1:DiP, S1:DiP-A, S5:DiP, S5:DiP-A, S5:OT, S5:OT-A                                                                       |
| 807 | No          | 7       | 7-B  | 200    | McF_6 | 0   | last   | wholeT_0.5  | J1:DiP, J1:DiP-A, J1:OT, J1:OT-A, J5:DiP, J5:DiP-A, J5:OT, J5:OT-A, S1:DiP, S1:DiP-A, S5:DiP, S5:DiP-A, S5:OT, S5:OT-A                                                       |
| 808 | No          | 7       | 7-B  | 200    | McF_6 | 0   | unif   | singleC     | J1:CBN, J1:CBN-A, J1:DiP, J1:DiP-A, J1:OT, J1:OT-A, J5:CBN, J5:CBN-A, J5:DiP, J5:DiP-A, J5:OT, J5:OT-A, S1:DiP, S1:DiP-A, S5:CBN, S5:CBN-A, S5:DiP, S5:DiP-A, S5:OT, S5:OT-A |
| 809 | No          | 7       | 7-B  | 200    | McF_6 | 0   | unif   | wholeT_0.01 | J1:CBN, J1:CBN-A, J1:DiP, J1:DiP-A, J1:OT, J1:OT-A, J5:CBN, J5:CBN-A, J5:DiP, J5:DiP-A, J5:OT, J5:OT-A, S1:DiP, S1:DiP-A, S5:CBN, S5:CBN-A, S5:DiP, S5:DiP-A, S5:OT, S5:OT-A |
| 810 | No          | 7       | 7-B  | 200    | McF_6 | 0   | unif   | wholeT_0.5  | J1:CBN, J1:CBN-A, J1:DiP, J1:DiP-A, J1:OT, J1:OT-A, J5:CBN, J5:CBN-A, J5:DiP, J5:DiP-A, J5:OT, J5:OT-A, S1:DiP, S5:CBN, S5:CBN-A, S5:DiP, S5:OT, S5:OT-A                     |
| 811 | No          | 7       | 7-B  | 200    | McF_6 | Inf | last   | singleC     | J1:DiP, J1:DiP-A, J1:OT, J1:OT-A, J5:DiP, J5:DiP-A, J5:OT, J5:OT-A, S1:DiP, S1:DiP-A, S5:DiP, S5:DiP-A, S5:OT, S5:OT-A                                                       |

Table 8: (continued)

|     | Conjunction | Drivers | Tree | S.Size | Model | sh  | S.Time | S.Type      | Best method(s)                                                                                                                                                               |
|-----|-------------|---------|------|--------|-------|-----|--------|-------------|------------------------------------------------------------------------------------------------------------------------------------------------------------------------------|
| 812 | No          | 7       | 7-B  | 200    | McF_6 | Inf | last   | wholeT_0.01 | J1:DiP, J5:DiP, J5:OT, J5:OT-A, S1:DiP, S5:DiP, S5:OT, S5:OT-A                                                                                                               |
| 813 | No          | 7       | 7-B  | 200    | McF_6 | Inf | last   | wholeT_0.5  | J1:DiP, J1:DiP-A, J1:OT, J1:OT-A, J5:DiP, J5:DiP-A, J5:OT, J5:OT-A, S1:DiP, S1:DiP-A, S5:DiP, S5:DiP-A, S5:OT, S5:OT-A                                                       |
| 814 | No          | 7       | 7-B  | 200    | McF_6 | Inf | unif   | singleC     | J1:CBN, J1:CBN-A, J1:DiP, J1:DiP-A, J1:OT, J1:OT-A, J5:CBN, J5:CBN-A, J5:DiP, J5:DiP-A, J5:OT, J5:OT-A, S5:CBN, S5:CBN-A, S5:DiP, S5:OT, S5:OT-A                             |
| 815 | No          | 7       | 7-B  | 200    | McF_6 | Inf | unif   | wholeT_0.01 | J1:CBN, J1:CBN-A, J1:DiP, J1:DiP-A, J5:CBN, J5:CBN-A, J5:DiP, J5:DiP-A, S1:DiP, S5:CBN, S5:CBN-A, S5:DiP, S5:DiP-A                                                           |
| 816 | No          | 7       | 7-B  | 200    | McF_6 | Inf | unif   | wholeT_0.5  | J1:CBN, J1:CBN-A, J1:DiP, J1:DiP-A, J5:CBN, J5:CBN-A, J5:DiP, J5:DiP-A, S1:DiP, S5:CBN, S5:CBN-A, S5:DiP, S5:DiP-A                                                           |
| 817 | No          | 7       | 7-B  | 100    | Bozic | 0   | last   | singleC     | J1:DiP, J1:DiP-A, J5:CBN, J5:CBN-A, J5:DiP, J5:DiP-A, J5:OT, J5:OT-A, S1:DiP, S1:DiP-A, S5:CBN, S5:DiP, S5:DiP-A, S5:OT, S5:OT-A                                             |
| 818 | No          | 7       | 7-B  | 100    | Bozic | 0   | last   | wholeT_0.01 | J1:DiP, J1:DiP-A, J1:OT, J5:CBN, J5:CBN-A, J5:DiP, J5:DiP-A, J5:OT, J5:OT-A, S1:DiP, S1:DiP-A, S5:CBN, S5:CBN-A, S5:DiP, S5:DiP-A, S5:OT, S5:OT-A                            |
| 819 | No          | 7       | 7-B  | 100    | Bozic | 0   | last   | wholeT_0.5  | J1:CBN, J1:DiP, J1:DiP-A, J5:CBN, J5:CBN-A, J5:DiP, J5:DiP-A, J5:OT, J5:OT-A, S1:DiP, S1:DiP-A, S5:CBN, S5:CBN-A, S5:DiP, S5:DiP-A, S5:OT, S5:OT-A                           |
| 820 | No          | 7       | 7-B  | 100    | Bozic | 0   | unif   | singleC     | J1:CBN, J1:CBN-A, J1:DiP, J1:DiP-A, J1:OT, J1:OT-A, J5:CBN, J5:CBN-A, J5:DiP, J5:DiP-A, J5:OT, J5:OT-A, S1:DiP, S1:DiP-A, S5:CBN, S5:CBN-A, S5:DiP, S5:DiP-A, S5:OT, S5:OT-A |
| 821 | No          | 7       | 7-B  | 100    | Bozic | 0   | unif   | wholeT_0.01 | J5:CBN, J5:CBN-A, J5:DiP, J5:DiP-A, J5:OT, J5:OT-A                                                                                                                           |

Table 8: (continued)

|     | Conjunction | Drivers | Tree | S.Size | Model | sh  | S.Time | S.Type      | Best method(s)                                                                                                                                                                               |
|-----|-------------|---------|------|--------|-------|-----|--------|-------------|----------------------------------------------------------------------------------------------------------------------------------------------------------------------------------------------|
| 822 | No          | 7       | 7-B  | 100    | Bozic | 0   | unif   | wholeT_0.5  | J1:CBN, J1:CBN-A, J1:DiP, J1:DiP-A, J1:OT, J1:OT-A, J5:CBN, J5:CBN-A, J5:DiP, J5:DiP-A, J5:OT, J5:OT-A, S1:DiP, S1:DiP-A, S5:CBN, S5:CBN-A, S5:DiP, S5:DiP-A, S5:OT, S5:OT-A                 |
| 823 | No          | 7       | 7-B  | 100    | Bozic | Inf | last   | singleC     | J1:DiP, J1:DiP-A, J5:CBN, J5:CBN-A, J5:DiP, J5:DiP-A, J5:OT, J5:OT-A, S1:DiP, S1:DiP-A, S5:DiP, S5:DiP-A                                                                                     |
| 824 | No          | 7       | 7-B  | 100    | Bozic | Inf | last   | wholeT_0.01 | J5:CBN, J5:CBN-A, J5:DiP                                                                                                                                                                     |
| 825 | No          | 7       | 7-B  | 100    | Bozic | Inf | last   | wholeT_0.5  | J1:DiP, J1:DiP-A, J5:CBN, J5:CBN-A, J5:DiP, J5:DiP-A, J5:OT, J5:OT-A, S1:DiP, S1:DiP-A, S5:DiP, S5:DiP-A, S5:OT, S5:OT-A                                                                     |
| 826 | No          | 7       | 7-B  | 100    | Bozic | Inf | unif   | singleC     | J5:CBN, J5:CBN-A, J5:DiP, J5:DiP-A, J5:OT, J5:OT-A, S5:CBN, S5:CBN-A, S5:DiP, S5:DiP-A                                                                                                       |
| 827 | No          | 7       | 7-B  | 100    | Bozic | Inf | unif   | wholeT_0.01 | J5:CBN, J5:CBN-A, J5:OT, J5:OT-A, S5:CBN                                                                                                                                                     |
| 828 | No          | 7       | 7-B  | 100    | Bozic | Inf | unif   | wholeT_0.5  | J5:CBN, J5:CBN-A, J5:DiP, J5:DiP-A, J5:OT, J5:OT-A, S5:CBN, S5:CBN-A, S5:DiP, S5:DiP-A, S5:OT, S5:OT-A                                                                                       |
| 829 | No          | 7       | 7-B  | 100    | exp   | 0   | last   | singleC     | J1:CBN, J1:CBN-A, J1:DiP, J1:DiP-A, J1:OT, J1:OT-A, J5:CBN, J5:CBN-A, J5:DiP, J5:DiP-A, J5:OT, J5:OT-A, S1:DiP, S1:DiP-A, S1:OT, S1:OT-A, S5:CBN, S5:CBN-A, S5:DiP, S5:DiP-A, S5:OT, S5:OT-A |
| 830 | No          | 7       | 7-B  | 100    | exp   | 0   | last   | wholeT_0.01 | J1:CBN, J1:CBN-A, J1:DiP, J1:DiP-A, J5:CBN, J5:CBN-A, J5:DiP, J5:DiP-A, J5:OT, J5:OT-A, S1:DiP, S1:DiP-A, S5:CBN, S5:CBN-A, S5:DiP, S5:DiP-A                                                 |
| 831 | No          | 7       | 7-B  | 100    | exp   | 0   | last   | wholeT_0.5  | J1:CBN, J1:CBN-A, J1:DiP, J1:DiP-A, J1:OT, J1:OT-A, J5:CBN, J5:CBN-A, J5:DiP, J5:DiP-A, J5:OT, J5:OT-A, S1:DiP, S1:DiP-A, S1:OT, S1:OT-A, S5:CBN, S5:CBN-A, S5:DiP, S5:DiP-A, S5:OT, S5:OT-A |
| 832 | No          | 7       | 7-B  | 100    | exp   | 0   | unif   | singleC     | none                                                                                                                                                                                         |



Table 8: (continued)

|     | Conjunction | Drivers | Tree | S.Size | Model | sh  | S.Time | S.Type      | Best method(s)                                                                                                                                     |
|-----|-------------|---------|------|--------|-------|-----|--------|-------------|----------------------------------------------------------------------------------------------------------------------------------------------------|
| 833 | No          | 7       | 7-B  | 100    | exp   | 0   | unif   | wholeT_0.01 | J1:DiP, J1:DiP-A, J5:CBN, J5:CBN-A, J5:DiP, J5:DiP-A, J5:OT, J5:OT-A, S1:DiP, S1:DiP-A, S5:CBN, S5:CBN-A, S5:DiP, S5:DiP-A, S5:OT, S5:OT-A         |
| 834 | No          | 7       | 7-B  | 100    | exp   | 0   | unif   | wholeT_0.5  | none                                                                                                                                               |
| 835 | No          | 7       | 7-B  | 100    | exp   | Inf | last   | singleC     | J1:DiP, J1:DiP-A, J1:OT, J1:OT-A, J5:CBN, J5:CBN-A, J5:DiP, J5:DiP-A, J5:OT, J5:OT-A, S1:DiP, S1:DiP-A, S5:DiP, S5:DiP-A, S5:OT, S5:OT-A           |
| 836 | No          | 7       | 7-B  | 100    | exp   | Inf | last   | wholeT_0.01 | J5:DiP, J5:DiP-A, S5:DiP                                                                                                                           |
| 837 | No          | 7       | 7-B  | 100    | exp   | Inf | last   | wholeT_0.5  | J1:DiP, J1:DiP-A, J1:OT, J1:OT-A, J5:CBN, J5:CBN-A, J5:DiP, J5:DiP-A, J5:OT, J5:OT-A, S1:DiP, S1:DiP-A, S5:DiP, S5:DiP-A, S5:OT, S5:OT-A           |
| 838 | No          | 7       | 7-B  | 100    | exp   | Inf | unif   | singleC     | J1:DiP, J1:DiP-A, J5:CBN, J5:CBN-A, J5:DiP, J5:DiP-A, J5:OT, J5:OT-A, S1:DiP, S1:DiP-A, S5:CBN, S5:CBN-A, S5:DiP, S5:DiP-A, S5:OT, S5:OT-A         |
| 839 | No          | 7       | 7-B  | 100    | exp   | Inf | unif   | wholeT_0.01 | J5:CBN, J5:CBN-A, J5:DiP, J5:DiP-A, J5:OT, J5:OT-A                                                                                                 |
| 840 | No          | 7       | 7-B  | 100    | exp   | Inf | unif   | wholeT_0.5  | J1:CBN, J1:DiP, J1:DiP-A, J5:CBN, J5:CBN-A, J5:DiP, J5:DiP-A, J5:OT, J5:OT-A, S1:DiP, S1:DiP-A, S5:CBN, S5:CBN-A, S5:DiP, S5:DiP-A, S5:OT, S5:OT-A |
| 841 | No          | 7       | 7-B  | 100    | McF_4 | 0   | last   | singleC     | J1:DiP, J1:DiP-A, J1:OT, J1:OT-A, J5:DiP, J5:DiP-A, J5:OT, J5:OT-A, S1:DiP, S1:DiP-A, S5:DiP, S5:DiP-A, S5:OT, S5:OT-A                             |
| 842 | No          | 7       | 7-B  | 100    | McF_4 | 0   | last   | wholeT_0.01 | J1:DiP, J1:DiP-A, J5:DiP, J5:DiP-A, J5:OT, J5:OT-A, S1:DiP, S1:DiP-A, S5:DiP, S5:DiP-A, S5:OT, S5:OT-A                                             |
| 843 | No          | 7       | 7-B  | 100    | McF_4 | 0   | last   | wholeT_0.5  | J1:DiP, J1:DiP-A, J1:OT, J1:OT-A, J5:DiP, J5:DiP-A, J5:OT, J5:OT-A, S1:DiP, S1:DiP-A, S5:DiP, S5:DiP-A, S5:OT, S5:OT-A                             |

Table 8: (continued)

|     | Conjunction | Drivers | Tree | S.Size | Model | sh  | S.Time | S.Type      | Best method(s)                                                                                                                                                               |
|-----|-------------|---------|------|--------|-------|-----|--------|-------------|------------------------------------------------------------------------------------------------------------------------------------------------------------------------------|
| 844 | No          | 7       | 7-B  | 100    | McF_4 | 0   | unif   | singleC     | J1:CBN, J1:CBN-A, J1:DiP, J1:DiP-A, J1:OT, J1:OT-A, J5:CBN, J5:CBN-A, J5:DiP, J5:DiP-A, J5:OT, J5:OT-A, S1:DiP, S1:DiP-A, S5:CBN, S5:CBN-A, S5:DiP, S5:DiP-A, S5:OT, S5:OT-A |
| 845 | No          | 7       | 7-B  | 100    | McF_4 | 0   | unif   | wholeT_0.01 | J1:CBN-A, J1:DiP, J1:DiP-A, J1:OT, J1:OT-A, J5:CBN, J5:CBN-A, J5:DiP, J5:DiP-A, J5:OT, J5:OT-A, S1:DiP, S1:DiP-A, S5:CBN, S5:CBN-A, S5:DiP, S5:DiP-A, S5:OT, S5:OT-A         |
| 846 | No          | 7       | 7-B  | 100    | McF_4 | 0   | unif   | wholeT_0.5  | J1:CBN, J1:CBN-A, J1:DiP, J1:DiP-A, J1:OT, J1:OT-A, J5:CBN, J5:CBN-A, J5:DiP, J5:DiP-A, J5:OT, J5:OT-A, S1:DiP, S1:DiP-A, S5:CBN, S5:CBN-A, S5:DiP, S5:DiP-A, S5:OT, S5:OT-A |
| 847 | No          | 7       | 7-B  | 100    | McF_4 | Inf | last   | singleC     | J1:DiP, J1:DiP-A, J1:OT, J1:OT-A, J5:DiP, J5:DiP-A, J5:OT, J5:OT-A, S1:DiP, S1:DiP-A, S5:DiP, S5:DiP-A, S5:OT, S5:OT-A                                                       |
| 848 | No          | 7       | 7-B  | 100    | McF_4 | Inf | last   | wholeT_0.01 | J1:DiP, J1:DiP-A, J5:DiP, J5:DiP-A, J5:OT, J5:OT-A, S1:DiP, S1:DiP-A, S5:DiP, S5:DiP-A, S5:OT, S5:OT-A                                                                       |
| 849 | No          | 7       | 7-B  | 100    | McF_4 | Inf | last   | wholeT_0.5  | J1:DiP, J1:DiP-A, J1:OT, J1:OT-A, J5:DiP, J5:DiP-A, J5:OT, J5:OT-A, S1:DiP, S1:DiP-A, S5:DiP, S5:DiP-A, S5:OT, S5:OT-A                                                       |
| 850 | No          | 7       | 7-B  | 100    | McF_4 | Inf | unif   | singleC     | J1:CBN, J1:CBN-A, J1:DiP, J1:DiP-A, J1:OT, J1:OT-A, J5:CBN, J5:CBN-A, J5:DiP, J5:DiP-A, J5:OT, J5:OT-A, S1:DiP, S1:DiP-A, S5:CBN, S5:CBN-A, S5:DiP, S5:DiP-A, S5:OT, S5:OT-A |
| 851 | No          | 7       | 7-B  | 100    | McF_4 | Inf | unif   | wholeT_0.01 | J1:CBN, J1:CBN-A, J1:DiP, J1:DiP-A, J5:CBN, J5:CBN-A, J5:DiP, J5:DiP-A, J5:OT, J5:OT-A, S1:DiP, S1:DiP-A, S5:CBN, S5:CBN-A, S5:DiP, S5:DiP-A, S5:OT, S5:OT-A                 |
| 852 | No          | 7       | 7-B  | 100    | McF_4 | Inf | unif   | wholeT_0.5  | J1:CBN, J1:CBN-A, J1:DiP, J1:DiP-A, J5:CBN, J5:CBN-A, J5:DiP, J5:DiP-A, S1:DiP, S1:DiP-A, S5:CBN, S5:CBN-A, S5:DiP, S5:DiP-A                                                 |

Table 8: (continued)

|     | Conjunction | Drivers | Tree | S.Size | Model | sh  | S.Time | S.Type      | Best method(s)                                                                                                         |
|-----|-------------|---------|------|--------|-------|-----|--------|-------------|------------------------------------------------------------------------------------------------------------------------|
| 853 | No          | 7       | 7-B  | 100    | McF_6 | 0   | last   | singleC     | J1:DiP, J1:DiP-A, J5:DiP, J5:DiP-A, J5:OT, J5:OT-A, S1:DiP, S1:DiP-A, S5:DiP, S5:DiP-A, S5:OT, S5:OT-A                 |
| 854 | No          | 7       | 7-B  | 100    | McF_6 | 0   | last   | wholeT_0.01 | J1:DiP, J5:DiP, J5:OT, J5:OT-A, S1:DiP, S5:DiP, S5:OT, S5:OT-A                                                         |
| 855 | No          | 7       | 7-B  | 100    | McF_6 | 0   | last   | wholeT_0.5  | J1:DiP, J1:DiP-A, J5:DiP, J5:DiP-A, J5:OT, J5:OT-A, S1:DiP, S1:DiP-A, S5:DiP, S5:DiP-A, S5:OT, S5:OT-A                 |
| 856 | No          | 7       | 7-B  | 100    | McF_6 | 0   | unif   | singleC     | J1:CBN, J1:CBN-A, J1:DiP, J5:CBN, J5:CBN-A, J5:DiP, J5:DiP-A, S1:DiP, S5:CBN, S5:CBN-A, S5:DiP                         |
| 857 | No          | 7       | 7-B  | 100    | McF_6 | 0   | unif   | wholeT_0.01 | J1:DiP, J1:DiP-A, J5:CBN, J5:CBN-A, J5:DiP, J5:DiP-A, S5:CBN, S5:CBN-A, S5:DiP, S5:DiP-A                               |
| 858 | No          | 7       | 7-B  | 100    | McF_6 | 0   | unif   | wholeT_0.5  | J1:CBN, J1:CBN-A, J5:CBN, J5:CBN-A, J5:DiP, J5:DiP-A, S5:CBN, S5:CBN-A                                                 |
| 859 | No          | 7       | 7-B  | 100    | McF_6 | Inf | last   | singleC     | J1:DiP, J1:DiP-A, J5:DiP, J5:DiP-A, J5:OT, J5:OT-A, S1:DiP, S1:DiP-A, S5:DiP, S5:DiP-A, S5:OT, S5:OT-A                 |
| 860 | No          | 7       | 7-B  | 100    | McF_6 | Inf | last   | wholeT_0.01 | J5:DiP, J5:OT, J5:OT-A, S1:DiP, S5:DiP, S5:OT, S5:OT-A                                                                 |
| 861 | No          | 7       | 7-B  | 100    | McF_6 | Inf | last   | wholeT_0.5  | J1:DiP, J1:DiP-A, J1:OT, J1:OT-A, J5:DiP, J5:DiP-A, J5:OT, J5:OT-A, S1:DiP, S1:DiP-A, S5:DiP, S5:DiP-A, S5:OT, S5:OT-A |
| 862 | No          | 7       | 7-B  | 100    | McF_6 | Inf | unif   | singleC     | J1:CBN, J1:CBN-A, J1:DiP, J5:CBN, J5:CBN-A, J5:DiP, J5:DiP-A, S5:CBN, S5:CBN-A                                         |
| 863 | No          | 7       | 7-B  | 100    | McF_6 | Inf | unif   | wholeT_0.01 | J1:DiP, J5:CBN, J5:CBN-A, J5:DiP, J5:DiP-A, S5:CBN, S5:CBN-A, S5:DiP                                                   |
| 864 | No          | 7       | 7-B  | 100    | McF_6 | Inf | unif   | wholeT_0.5  | J1:CBN, J1:CBN-A, J1:DiP, J5:CBN, J5:CBN-A, J5:DiP, J5:DiP-A, S5:CBN, S5:CBN-A                                         |

#### 4 Drivers Known (MCB)

## 4.1 Confidence sets (MCB), Diff, Drivers Known

Table 9: Confidence sets (method MCB) when Drivers are Known for measure Diff.

|    | Conjunction | Drivers | Tree | S.Size | Model | sh  | S.Time | S.Type      | Best method(s)              |
|----|-------------|---------|------|--------|-------|-----|--------|-------------|-----------------------------|
| 1  | Yes         | 11      | 11-A | 1000   | Bozic | 0   | last   | singleC     | OT, OT-A                    |
| 2  | Yes         | 11      | 11-A | 1000   | Bozic | 0   | last   | wholeT_0.01 | CBN-A, DiP, DiP-A, OT, OT-A |
| 3  | Yes         | 11      | 11-A | 1000   | Bozic | 0   | last   | wholeT_0.5  | OT, OT-A                    |
| 4  | Yes         | 11      | 11-A | 1000   | Bozic | 0   | unif   | singleC     | OT, OT-A                    |
| 5  | Yes         | 11      | 11-A | 1000   | Bozic | 0   | unif   | wholeT_0.01 | CBN-A, OT, OT-A             |
| 6  | Yes         | 11      | 11-A | 1000   | Bozic | 0   | unif   | wholeT_0.5  | OT, OT-A                    |
| 7  | Yes         | 11      | 11-A | 1000   | Bozic | Inf | last   | singleC     | OT, OT-A                    |
| 8  | Yes         | 11      | 11-A | 1000   | Bozic | Inf | last   | wholeT_0.01 | CBN-A, DiP, DiP-A, OT, OT-A |
| 9  | Yes         | 11      | 11-A | 1000   | Bozic | Inf | last   | wholeT_0.5  | OT, OT-A                    |
| 10 | Yes         | 11      | 11-A | 1000   | Bozic | Inf | unif   | singleC     | OT, OT-A                    |
| 11 | Yes         | 11      | 11-A | 1000   | Bozic | Inf | unif   | wholeT_0.01 | CBN-A, OT, OT-A             |
| 12 | Yes         | 11      | 11-A | 1000   | Bozic | Inf | unif   | wholeT_0.5  | OT, OT-A                    |
| 13 | Yes         | 11      | 11-A | 1000   | exp   | 0   | last   | singleC     | OT, OT-A                    |
| 14 | Yes         | 11      | 11-A | 1000   | exp   | 0   | last   | wholeT_0.01 | OT, OT-A                    |
| 15 | Yes         | 11      | 11-A | 1000   | exp   | 0   | last   | wholeT_0.5  | OT-A                        |
| 16 | Yes         | 11      | 11-A | 1000   | exp   | 0   | unif   | singleC     | OT, OT-A                    |
| 17 | Yes         | 11      | 11-A | 1000   | exp   | 0   | unif   | wholeT_0.01 | OT, OT-A                    |
| 18 | Yes         | 11      | 11-A | 1000   | exp   | 0   | unif   | wholeT_0.5  | OT, OT-A                    |
| 19 | Yes         | 11      | 11-A | 1000   | exp   | Inf | last   | singleC     | OT, OT-A                    |
| 20 | Yes         | 11      | 11-A | 1000   | exp   | Inf | last   | wholeT_0.01 | OT, OT-A                    |
| 21 | Yes         | 11      | 11-A | 1000   | exp   | Inf | last   | wholeT_0.5  | OT, OT-A                    |
| 22 | Yes         | 11      | 11-A | 1000   | exp   | Inf | unif   | singleC     | OT, OT-A                    |
| 23 | Yes         | 11      | 11-A | 1000   | exp   | Inf | unif   | wholeT_0.01 | CBN, OT, OT-A               |
| 24 | Yes         | 11      | 11-A | 1000   | exp   | Inf | unif   | wholeT_0.5  | OT, OT-A                    |
| 25 | Yes         | 11      | 11-A | 1000   | McF_4 | 0   | last   | singleC     | OT, OT-A                    |
| 26 | Yes         | 11      | 11-A | 1000   | McF_4 | 0   | last   | wholeT_0.01 | OT, OT-A                    |
| 27 | Yes         | 11      | 11-A | 1000   | McF_4 | 0   | last   | wholeT_0.5  | OT, OT-A                    |
| 28 | Yes         | 11      | 11-A | 1000   | McF_4 | 0   | unif   | singleC     | OT, OT-A                    |
| 29 | Yes         | 11      | 11-A | 1000   | McF_4 | 0   | unif   | wholeT_0.01 | OT, OT-A                    |
| 30 | Yes         | 11      | 11-A | 1000   | McF_4 | 0   | unif   | wholeT_0.5  | OT, OT-A                    |
| 31 | Yes         | 11      | 11-A | 1000   | McF_4 | Inf | last   | singleC     | OT, OT-A                    |
| 32 | Yes         | 11      | 11-A | 1000   | McF_4 | Inf | last   | wholeT_0.01 | OT, OT-A                    |
| 33 | Yes         | 11      | 11-A | 1000   | McF_4 | Inf | last   | wholeT_0.5  | OT, OT-A                    |
| 34 | Yes         | 11      | 11-A | 1000   | McF_4 | Inf | unif   | singleC     | OT, OT-A                    |
| 35 | Yes         | 11      | 11-A | 1000   | McF_4 | Inf | unif   | wholeT_0.01 | OT, OT-A                    |
| 36 | Yes         | 11      | 11-A | 1000   | McF_4 | Inf | unif   | wholeT_0.5  | OT, OT-A                    |
| 37 | Yes         | 11      | 11-A | 1000   | McF_6 | 0   | last   | singleC     | DiP                         |

Table 9: (continued)

|    | Conjunction | Drivers | Tree | S.Size | Model | sh  | S.Time | S.Type      | Best method(s)       |
|----|-------------|---------|------|--------|-------|-----|--------|-------------|----------------------|
| 38 | Yes         | 11      | 11-A | 1000   | McF_6 | 0   | last   | wholeT_0.01 | DiP                  |
| 39 | Yes         | 11      | 11-A | 1000   | McF_6 | 0   | last   | wholeT_0.5  | DiP                  |
| 40 | Yes         | 11      | 11-A | 1000   | McF_6 | 0   | unif   | singleC     | DiP, DiP-A, OT       |
| 41 | Yes         | 11      | 11-A | 1000   | McF_6 | 0   | unif   | wholeT_0.01 | DiP, DiP-A           |
| 42 | Yes         | 11      | 11-A | 1000   | McF_6 | 0   | unif   | wholeT_0.5  | DiP, DiP-A, OT, OT-A |
| 43 | Yes         | 11      | 11-A | 1000   | McF_6 | Inf | last   | singleC     | OT                   |
| 44 | Yes         | 11      | 11-A | 1000   | McF_6 | Inf | last   | wholeT_0.01 | OT                   |
| 45 | Yes         | 11      | 11-A | 1000   | McF_6 | Inf | last   | wholeT_0.5  | DiP, OT              |
| 46 | Yes         | 11      | 11-A | 1000   | McF_6 | Inf | unif   | singleC     | DiP, DiP-A, OT       |
| 47 | Yes         | 11      | 11-A | 1000   | McF_6 | Inf | unif   | wholeT_0.01 | DiP, DiP-A, OT, OT-A |
| 48 | Yes         | 11      | 11-A | 1000   | McF_6 | Inf | unif   | wholeT_0.5  | DiP, DiP-A, OT-A     |
| 49 | Yes         | 11      | 11-A | 200    | Bozic | 0   | last   | singleC     | OT, OT-A             |
| 50 | Yes         | 11      | 11-A | 200    | Bozic | 0   | last   | wholeT_0.01 | OT, OT-A             |
| 51 | Yes         | 11      | 11-A | 200    | Bozic | 0   | last   | wholeT_0.5  | OT, OT-A             |
| 52 | Yes         | 11      | 11-A | 200    | Bozic | 0   | unif   | singleC     | OT, OT-A             |
| 53 | Yes         | 11      | 11-A | 200    | Bozic | 0   | unif   | wholeT_0.01 | OT, OT-A             |
| 54 | Yes         | 11      | 11-A | 200    | Bozic | 0   | unif   | wholeT_0.5  | OT, OT-A             |
| 55 | Yes         | 11      | 11-A | 200    | Bozic | Inf | last   | singleC     | OT, OT-A             |
| 56 | Yes         | 11      | 11-A | 200    | Bozic | Inf | last   | wholeT_0.01 | OT, OT-A             |
| 57 | Yes         | 11      | 11-A | 200    | Bozic | Inf | last   | wholeT_0.5  | OT, OT-A             |
| 58 | Yes         | 11      | 11-A | 200    | Bozic | Inf | unif   | singleC     | OT, OT-A             |
| 59 | Yes         | 11      | 11-A | 200    | Bozic | Inf | unif   | wholeT_0.01 | OT, OT-A             |
| 60 | Yes         | 11      | 11-A | 200    | Bozic | Inf | unif   | wholeT_0.5  | OT, OT-A             |
| 61 | Yes         | 11      | 11-A | 200    | exp   | 0   | last   | singleC     | OT, OT-A             |
| 62 | Yes         | 11      | 11-A | 200    | exp   | 0   | last   | wholeT_0.01 | OT, OT-A             |
| 63 | Yes         | 11      | 11-A | 200    | exp   | 0   | last   | wholeT_0.5  | OT, OT-A             |
| 64 | Yes         | 11      | 11-A | 200    | exp   | 0   | unif   | singleC     | OT, OT-A             |
| 65 | Yes         | 11      | 11-A | 200    | exp   | 0   | unif   | wholeT_0.01 | OT, OT-A             |
| 66 | Yes         | 11      | 11-A | 200    | exp   | 0   | unif   | wholeT_0.5  | OT, OT-A             |
| 67 | Yes         | 11      | 11-A | 200    | exp   | Inf | last   | singleC     | OT, OT-A             |
| 68 | Yes         | 11      | 11-A | 200    | exp   | Inf | last   | wholeT_0.01 | CBN-A, OT, OT-A      |
| 69 | Yes         | 11      | 11-A | 200    | exp   | Inf | last   | wholeT_0.5  | OT, OT-A             |
| 70 | Yes         | 11      | 11-A | 200    | exp   | Inf | unif   | singleC     | OT, OT-A             |
| 71 | Yes         | 11      | 11-A | 200    | exp   | Inf | unif   | wholeT_0.01 | OT, OT-A             |
| 72 | Yes         | 11      | 11-A | 200    | exp   | Inf | unif   | wholeT_0.5  | OT, OT-A             |
| 73 | Yes         | 11      | 11-A | 200    | McF_4 | 0   | last   | singleC     | OT, OT-A             |
| 74 | Yes         | 11      | 11-A | 200    | McF_4 | 0   | last   | wholeT_0.01 | OT, OT-A             |
| 75 | Yes         | 11      | 11-A | 200    | McF_4 | 0   | last   | wholeT_0.5  | OT, OT-A             |
| 76 | Yes         | 11      | 11-A | 200    | McF_4 | 0   | unif   | singleC     | OT, OT-A             |
| 77 | Yes         | 11      | 11-A | 200    | McF_4 | 0   | unif   | wholeT_0.01 | OT, OT-A             |

Table 9: (continued)

|     | Conjunction | Drivers | Tree | S.Size | Model | sh  | S.Time | S.Type      | Best method(s)       |
|-----|-------------|---------|------|--------|-------|-----|--------|-------------|----------------------|
| 78  | Yes         | 11      | 11-A | 200    | McF_4 | 0   | unif   | wholeT_0.5  | OT, OT-A             |
| 79  | Yes         | 11      | 11-A | 200    | McF_4 | Inf | last   | singleC     | OT, OT-A             |
| 80  | Yes         | 11      | 11-A | 200    | McF_4 | Inf | last   | wholeT_0.01 | OT, OT-A             |
| 81  | Yes         | 11      | 11-A | 200    | McF_4 | Inf | last   | wholeT_0.5  | OT, OT-A             |
| 82  | Yes         | 11      | 11-A | 200    | McF_4 | Inf | unif   | singleC     | OT, OT-A             |
| 83  | Yes         | 11      | 11-A | 200    | McF_4 | Inf | unif   | wholeT_0.01 | OT, OT-A             |
| 84  | Yes         | 11      | 11-A | 200    | McF_4 | Inf | unif   | wholeT_0.5  | OT, OT-A             |
| 85  | Yes         | 11      | 11-A | 200    | McF_6 | 0   | last   | singleC     | OT                   |
| 86  | Yes         | 11      | 11-A | 200    | McF_6 | 0   | last   | wholeT_0.01 | OT                   |
| 87  | Yes         | 11      | 11-A | 200    | McF_6 | 0   | last   | wholeT_0.5  | OT                   |
| 88  | Yes         | 11      | 11-A | 200    | McF_6 | 0   | unif   | singleC     | OT, OT-A             |
| 89  | Yes         | 11      | 11-A | 200    | McF_6 | 0   | unif   | wholeT_0.01 | OT, OT-A             |
| 90  | Yes         | 11      | 11-A | 200    | McF_6 | 0   | unif   | wholeT_0.5  | OT, OT-A             |
| 91  | Yes         | 11      | 11-A | 200    | McF_6 | Inf | last   | singleC     | OT                   |
| 92  | Yes         | 11      | 11-A | 200    | McF_6 | Inf | last   | wholeT_0.01 | OT, OT-A             |
| 93  | Yes         | 11      | 11-A | 200    | McF_6 | Inf | last   | wholeT_0.5  | OT                   |
| 94  | Yes         | 11      | 11-A | 200    | McF_6 | Inf | unif   | singleC     | CBN, CBN-A, OT, OT-A |
| 95  | Yes         | 11      | 11-A | 200    | McF_6 | Inf | unif   | wholeT_0.01 | CBN-A, OT, OT-A      |
| 96  | Yes         | 11      | 11-A | 200    | McF_6 | Inf | unif   | wholeT_0.5  | OT, OT-A             |
| 97  | Yes         | 11      | 11-A | 100    | Bozic | 0   | last   | singleC     | OT, OT-A             |
| 98  | Yes         | 11      | 11-A | 100    | Bozic | 0   | last   | wholeT_0.01 | OT, OT-A             |
| 99  | Yes         | 11      | 11-A | 100    | Bozic | 0   | last   | wholeT_0.5  | OT, OT-A             |
| 100 | Yes         | 11      | 11-A | 100    | Bozic | 0   | unif   | singleC     | OT, OT-A             |
| 101 | Yes         | 11      | 11-A | 100    | Bozic | 0   | unif   | wholeT_0.01 | OT, OT-A             |
| 102 | Yes         | 11      | 11-A | 100    | Bozic | 0   | unif   | wholeT_0.5  | OT, OT-A             |
| 103 | Yes         | 11      | 11-A | 100    | Bozic | Inf | last   | singleC     | OT, OT-A             |
| 104 | Yes         | 11      | 11-A | 100    | Bozic | Inf | last   | wholeT_0.01 | OT                   |
| 105 | Yes         | 11      | 11-A | 100    | Bozic | Inf | last   | wholeT_0.5  | OT, OT-A             |
| 106 | Yes         | 11      | 11-A | 100    | Bozic | Inf | unif   | singleC     | OT, OT-A             |
| 107 | Yes         | 11      | 11-A | 100    | Bozic | Inf | unif   | wholeT_0.01 | OT, OT-A             |
| 108 | Yes         | 11      | 11-A | 100    | Bozic | Inf | unif   | wholeT_0.5  | OT, OT-A             |
| 109 | Yes         | 11      | 11-A | 100    | exp   | 0   | last   | singleC     | OT, OT-A             |
| 110 | Yes         | 11      | 11-A | 100    | exp   | 0   | last   | wholeT_0.01 | OT, OT-A             |
| 111 | Yes         | 11      | 11-A | 100    | exp   | 0   | last   | wholeT_0.5  | OT                   |
| 112 | Yes         | 11      | 11-A | 100    | exp   | 0   | unif   | singleC     | OT, OT-A             |
| 113 | Yes         | 11      | 11-A | 100    | exp   | 0   | unif   | wholeT_0.01 | OT, OT-A             |
| 114 | Yes         | 11      | 11-A | 100    | exp   | 0   | unif   | wholeT_0.5  | OT, OT-A             |
| 115 | Yes         | 11      | 11-A | 100    | exp   | Inf | last   | singleC     | OT, OT-A             |
| 116 | Yes         | 11      | 11-A | 100    | exp   | Inf | last   | wholeT_0.01 | OT, OT-A             |
| 117 | Yes         | 11      | 11-A | 100    | exp   | Inf | last   | wholeT_0.5  | OT, OT-A             |

Table 9: (continued)

|     | Conjunction | Drivers | Tree | S.Size | Model | sh  | S.Time | S.Type      | Best method(s)  |
|-----|-------------|---------|------|--------|-------|-----|--------|-------------|-----------------|
| 118 | Yes         | 11      | 11-A | 100    | exp   | Inf | unif   | singleC     | OT, OT-A        |
| 119 | Yes         | 11      | 11-A | 100    | exp   | Inf | unif   | wholeT_0.01 | OT, OT-A        |
| 120 | Yes         | 11      | 11-A | 100    | exp   | Inf | unif   | wholeT_0.5  | OT, OT-A        |
| 121 | Yes         | 11      | 11-A | 100    | McF_4 | 0   | last   | singleC     | OT, OT-A        |
| 122 | Yes         | 11      | 11-A | 100    | McF_4 | 0   | last   | wholeT_0.01 | OT              |
| 123 | Yes         | 11      | 11-A | 100    | McF_4 | 0   | last   | wholeT_0.5  | OT, OT-A        |
| 124 | Yes         | 11      | 11-A | 100    | McF_4 | 0   | unif   | singleC     | OT, OT-A        |
| 125 | Yes         | 11      | 11-A | 100    | McF_4 | 0   | unif   | wholeT_0.01 | OT, OT-A        |
| 126 | Yes         | 11      | 11-A | 100    | McF_4 | 0   | unif   | wholeT_0.5  | OT, OT-A        |
| 127 | Yes         | 11      | 11-A | 100    | McF_4 | Inf | last   | singleC     | OT, OT-A        |
| 128 | Yes         | 11      | 11-A | 100    | McF_4 | Inf | last   | wholeT_0.01 | OT, OT-A        |
| 129 | Yes         | 11      | 11-A | 100    | McF_4 | Inf | last   | wholeT_0.5  | OT, OT-A        |
| 130 | Yes         | 11      | 11-A | 100    | McF_4 | Inf | unif   | singleC     | OT, OT-A        |
| 131 | Yes         | 11      | 11-A | 100    | McF_4 | Inf | unif   | wholeT_0.01 | OT, OT-A        |
| 132 | Yes         | 11      | 11-A | 100    | McF_4 | Inf | unif   | wholeT_0.5  | OT, OT-A        |
| 133 | Yes         | 11      | 11-A | 100    | McF_6 | 0   | last   | singleC     | OT              |
| 134 | Yes         | 11      | 11-A | 100    | McF_6 | 0   | last   | wholeT_0.01 | OT, OT-A        |
| 135 | Yes         | 11      | 11-A | 100    | McF_6 | 0   | last   | wholeT_0.5  | OT              |
| 136 | Yes         | 11      | 11-A | 100    | McF_6 | 0   | unif   | singleC     | OT, OT-A        |
| 137 | Yes         | 11      | 11-A | 100    | McF_6 | 0   | unif   | wholeT_0.01 | OT, OT-A        |
| 138 | Yes         | 11      | 11-A | 100    | McF_6 | 0   | unif   | wholeT_0.5  | OT, OT-A        |
| 139 | Yes         | 11      | 11-A | 100    | McF_6 | Inf | last   | singleC     | OT              |
| 140 | Yes         | 11      | 11-A | 100    | McF_6 | Inf | last   | wholeT_0.01 | OT, OT-A        |
| 141 | Yes         | 11      | 11-A | 100    | McF_6 | Inf | last   | wholeT_0.5  | OT              |
| 142 | Yes         | 11      | 11-A | 100    | McF_6 | Inf | unif   | singleC     | OT, OT-A        |
| 143 | Yes         | 11      | 11-A | 100    | McF_6 | Inf | unif   | wholeT_0.01 | CBN-A, OT, OT-A |
| 144 | Yes         | 11      | 11-A | 100    | McF_6 | Inf | unif   | wholeT_0.5  | OT, OT-A        |
| 145 | Yes         | 9       | 9-A  | 1000   | Bozic | 0   | last   | singleC     | OT, OT-A        |
| 146 | Yes         | 9       | 9-A  | 1000   | Bozic | 0   | last   | wholeT_0.01 | OT, OT-A        |
| 147 | Yes         | 9       | 9-A  | 1000   | Bozic | 0   | last   | wholeT_0.5  | OT, OT-A        |
| 148 | Yes         | 9       | 9-A  | 1000   | Bozic | 0   | unif   | singleC     | OT, OT-A        |
| 149 | Yes         | 9       | 9-A  | 1000   | Bozic | 0   | unif   | wholeT_0.01 | OT, OT-A        |
| 150 | Yes         | 9       | 9-A  | 1000   | Bozic | 0   | unif   | wholeT_0.5  | OT, OT-A        |
| 151 | Yes         | 9       | 9-A  | 1000   | Bozic | Inf | last   | singleC     | OT, OT-A        |
| 152 | Yes         | 9       | 9-A  | 1000   | Bozic | Inf | last   | wholeT_0.01 | OT, OT-A        |
| 153 | Yes         | 9       | 9-A  | 1000   | Bozic | Inf | last   | wholeT_0.5  | OT, OT-A        |
| 154 | Yes         | 9       | 9-A  | 1000   | Bozic | Inf | unif   | singleC     | OT, OT-A        |
| 155 | Yes         | 9       | 9-A  | 1000   | Bozic | Inf | unif   | wholeT_0.01 | CBN-A, OT, OT-A |
| 156 | Yes         | 9       | 9-A  | 1000   | Bozic | Inf | unif   | wholeT_0.5  | OT, OT-A        |
| 157 | Yes         | 9       | 9-A  | 1000   | exp   | 0   | last   | singleC     | OT, OT-A        |



Table 9: (continued)

|     | Conjunction | Drivers | Tree | S.Size | Model | sh  | S.Time | S.Type      | Best method(s)       |
|-----|-------------|---------|------|--------|-------|-----|--------|-------------|----------------------|
| 158 | Yes         | 9       | 9-A  | 1000   | exp   | 0   | last   | wholeT_0.01 | OT, OT-A             |
| 159 | Yes         | 9       | 9-A  | 1000   | exp   | 0   | last   | wholeT_0.5  | OT, OT-A             |
| 160 | Yes         | 9       | 9-A  | 1000   | exp   | 0   | unif   | singleC     | OT, OT-A             |
| 161 | Yes         | 9       | 9-A  | 1000   | exp   | 0   | unif   | wholeT_0.01 | OT, OT-A             |
| 162 | Yes         | 9       | 9-A  | 1000   | exp   | 0   | unif   | wholeT_0.5  | OT, OT-A             |
| 163 | Yes         | 9       | 9-A  | 1000   | exp   | Inf | last   | singleC     | OT, OT-A             |
| 164 | Yes         | 9       | 9-A  | 1000   | exp   | Inf | last   | wholeT_0.01 | CBN, OT, OT-A        |
| 165 | Yes         | 9       | 9-A  | 1000   | exp   | Inf | last   | wholeT_0.5  | OT, OT-A             |
| 166 | Yes         | 9       | 9-A  | 1000   | exp   | Inf | unif   | singleC     | OT, OT-A             |
| 167 | Yes         | 9       | 9-A  | 1000   | exp   | Inf | unif   | wholeT_0.01 | OT, OT-A             |
| 168 | Yes         | 9       | 9-A  | 1000   | exp   | Inf | unif   | wholeT_0.5  | OT, OT-A             |
| 169 | Yes         | 9       | 9-A  | 1000   | McF_4 | 0   | last   | singleC     | OT, OT-A             |
| 170 | Yes         | 9       | 9-A  | 1000   | McF_4 | 0   | last   | wholeT_0.01 | DiP, DiP-A, OT, OT-A |
| 171 | Yes         | 9       | 9-A  | 1000   | McF_4 | 0   | last   | wholeT_0.5  | OT, OT-A             |
| 172 | Yes         | 9       | 9-A  | 1000   | McF_4 | 0   | unif   | singleC     | OT, OT-A             |
| 173 | Yes         | 9       | 9-A  | 1000   | McF_4 | 0   | unif   | wholeT_0.01 | DiP-A, OT, OT-A      |
| 174 | Yes         | 9       | 9-A  | 1000   | McF_4 | 0   | unif   | wholeT_0.5  | OT, OT-A             |
| 175 | Yes         | 9       | 9-A  | 1000   | McF_4 | Inf | last   | singleC     | OT, OT-A             |
| 176 | Yes         | 9       | 9-A  | 1000   | McF_4 | Inf | last   | wholeT_0.01 | OT                   |
| 177 | Yes         | 9       | 9-A  | 1000   | McF_4 | Inf | last   | wholeT_0.5  | OT, OT-A             |
| 178 | Yes         | 9       | 9-A  | 1000   | McF_4 | Inf | unif   | singleC     | OT, OT-A             |
| 179 | Yes         | 9       | 9-A  | 1000   | McF_4 | Inf | unif   | wholeT_0.01 | OT, OT-A             |
| 180 | Yes         | 9       | 9-A  | 1000   | McF_4 | Inf | unif   | wholeT_0.5  | OT, OT-A             |
| 181 | Yes         | 9       | 9-A  | 1000   | McF_6 | 0   | last   | singleC     | OT                   |
| 182 | Yes         | 9       | 9-A  | 1000   | McF_6 | 0   | last   | wholeT_0.01 | DiP, OT              |
| 183 | Yes         | 9       | 9-A  | 1000   | McF_6 | 0   | last   | wholeT_0.5  | OT                   |
| 184 | Yes         | 9       | 9-A  | 1000   | McF_6 | 0   | unif   | singleC     | DiP, DiP-A, OT, OT-A |
| 185 | Yes         | 9       | 9-A  | 1000   | McF_6 | 0   | unif   | wholeT_0.01 | DiP, DiP-A, OT, OT-A |
| 186 | Yes         | 9       | 9-A  | 1000   | McF_6 | 0   | unif   | wholeT_0.5  | DiP, DiP-A, OT, OT-A |
| 187 | Yes         | 9       | 9-A  | 1000   | McF_6 | Inf | last   | singleC     | OT                   |
| 188 | Yes         | 9       | 9-A  | 1000   | McF_6 | Inf | last   | wholeT_0.01 | OT                   |
| 189 | Yes         | 9       | 9-A  | 1000   | McF_6 | Inf | last   | wholeT_0.5  | DiP, OT              |
| 190 | Yes         | 9       | 9-A  | 1000   | McF_6 | Inf | unif   | singleC     | CBN, OT, OT-A        |
| 191 | Yes         | 9       | 9-A  | 1000   | McF_6 | Inf | unif   | wholeT_0.01 | CBN-A, OT, OT-A      |
| 192 | Yes         | 9       | 9-A  | 1000   | McF_6 | Inf | unif   | wholeT_0.5  | OT, OT-A             |
| 193 | Yes         | 9       | 9-A  | 200    | Bozic | 0   | last   | singleC     | OT, OT-A             |
| 194 | Yes         | 9       | 9-A  | 200    | Bozic | 0   | last   | wholeT_0.01 | OT, OT-A             |
| 195 | Yes         | 9       | 9-A  | 200    | Bozic | 0   | last   | wholeT_0.5  | OT, OT-A             |
| 196 | Yes         | 9       | 9-A  | 200    | Bozic | 0   | unif   | singleC     | OT, OT-A             |
| 197 | Yes         | 9       | 9-A  | 200    | Bozic | 0   | unif   | wholeT_0.01 | OT, OT-A             |

Table 9: (continued)

|     | Conjunction | Drivers | Tree | S.Size | Model | sh  | S.Time | S.Type      | Best method(s) |
|-----|-------------|---------|------|--------|-------|-----|--------|-------------|----------------|
| 198 | Yes         | 9       | 9-A  | 200    | Bozic | 0   | unif   | wholeT_0.5  | OT, OT-A       |
| 199 | Yes         | 9       | 9-A  | 200    | Bozic | Inf | last   | singleC     | OT, OT-A       |
| 200 | Yes         | 9       | 9-A  | 200    | Bozic | Inf | last   | wholeT_0.01 | OT, OT-A       |
| 201 | Yes         | 9       | 9-A  | 200    | Bozic | Inf | last   | wholeT_0.5  | OT, OT-A       |
| 202 | Yes         | 9       | 9-A  | 200    | Bozic | Inf | unif   | singleC     | OT, OT-A       |
| 203 | Yes         | 9       | 9-A  | 200    | Bozic | Inf | unif   | wholeT_0.01 | OT, OT-A       |
| 204 | Yes         | 9       | 9-A  | 200    | Bozic | Inf | unif   | wholeT_0.5  | OT, OT-A       |
| 205 | Yes         | 9       | 9-A  | 200    | exp   | 0   | last   | singleC     | OT, OT-A       |
| 206 | Yes         | 9       | 9-A  | 200    | exp   | 0   | last   | wholeT_0.01 | OT, OT-A       |
| 207 | Yes         | 9       | 9-A  | 200    | exp   | 0   | last   | wholeT_0.5  | OT, OT-A       |
| 208 | Yes         | 9       | 9-A  | 200    | exp   | 0   | unif   | singleC     | OT, OT-A       |
| 209 | Yes         | 9       | 9-A  | 200    | exp   | 0   | unif   | wholeT_0.01 | OT, OT-A       |
| 210 | Yes         | 9       | 9-A  | 200    | exp   | 0   | unif   | wholeT_0.5  | OT, OT-A       |
| 211 | Yes         | 9       | 9-A  | 200    | exp   | Inf | last   | singleC     | OT, OT-A       |
| 212 | Yes         | 9       | 9-A  | 200    | exp   | Inf | last   | wholeT_0.01 | OT, OT-A       |
| 213 | Yes         | 9       | 9-A  | 200    | exp   | Inf | last   | wholeT_0.5  | OT, OT-A       |
| 214 | Yes         | 9       | 9-A  | 200    | exp   | Inf | unif   | singleC     | OT, OT-A       |
| 215 | Yes         | 9       | 9-A  | 200    | exp   | Inf | unif   | wholeT_0.01 | OT, OT-A       |
| 216 | Yes         | 9       | 9-A  | 200    | exp   | Inf | unif   | wholeT_0.5  | OT             |
| 217 | Yes         | 9       | 9-A  | 200    | McF_4 | 0   | last   | singleC     | OT, OT-A       |
| 218 | Yes         | 9       | 9-A  | 200    | McF_4 | 0   | last   | wholeT_0.01 | OT, OT-A       |
| 219 | Yes         | 9       | 9-A  | 200    | McF_4 | 0   | last   | wholeT_0.5  | OT, OT-A       |
| 220 | Yes         | 9       | 9-A  | 200    | McF_4 | 0   | unif   | singleC     | OT, OT-A       |
| 221 | Yes         | 9       | 9-A  | 200    | McF_4 | 0   | unif   | wholeT_0.01 | OT, OT-A       |
| 222 | Yes         | 9       | 9-A  | 200    | McF_4 | 0   | unif   | wholeT_0.5  | OT, OT-A       |
| 223 | Yes         | 9       | 9-A  | 200    | McF_4 | Inf | last   | singleC     | OT, OT-A       |
| 224 | Yes         | 9       | 9-A  | 200    | McF_4 | Inf | last   | wholeT_0.01 | OT             |
| 225 | Yes         | 9       | 9-A  | 200    | McF_4 | Inf | last   | wholeT_0.5  | OT, OT-A       |
| 226 | Yes         | 9       | 9-A  | 200    | McF_4 | Inf | unif   | singleC     | OT, OT-A       |
| 227 | Yes         | 9       | 9-A  | 200    | McF_4 | Inf | unif   | wholeT_0.01 | OT, OT-A       |
| 228 | Yes         | 9       | 9-A  | 200    | McF_4 | Inf | unif   | wholeT_0.5  | OT, OT-A       |
| 229 | Yes         | 9       | 9-A  | 200    | McF_6 | 0   | last   | singleC     | OT             |
| 230 | Yes         | 9       | 9-A  | 200    | McF_6 | 0   | last   | wholeT_0.01 | OT             |
| 231 | Yes         | 9       | 9-A  | 200    | McF_6 | 0   | last   | wholeT_0.5  | OT             |
| 232 | Yes         | 9       | 9-A  | 200    | McF_6 | 0   | unif   | singleC     | CBN, OT, OT-A  |
| 233 | Yes         | 9       | 9-A  | 200    | McF_6 | 0   | unif   | wholeT_0.01 | OT, OT-A       |
| 234 | Yes         | 9       | 9-A  | 200    | McF_6 | 0   | unif   | wholeT_0.5  | OT, OT-A       |
| 235 | Yes         | 9       | 9-A  | 200    | McF_6 | Inf | last   | singleC     | OT             |
| 236 | Yes         | 9       | 9-A  | 200    | McF_6 | Inf | last   | wholeT_0.01 | OT             |
| 237 | Yes         | 9       | 9-A  | 200    | McF_6 | Inf | last   | wholeT_0.5  | OT             |

Table 9: (continued)

|     | Conjunction | Drivers | Tree | S.Size | Model | sh  | S.Time | S.Type      | Best method(s) |
|-----|-------------|---------|------|--------|-------|-----|--------|-------------|----------------|
| 238 | Yes         | 9       | 9-A  | 200    | McF_6 | Inf | unif   | singleC     | OT, OT-A       |
| 239 | Yes         | 9       | 9-A  | 200    | McF_6 | Inf | unif   | wholeT_0.01 | OT, OT-A       |
| 240 | Yes         | 9       | 9-A  | 200    | McF_6 | Inf | unif   | wholeT_0.5  | OT, OT-A       |
| 241 | Yes         | 9       | 9-A  | 100    | Bozic | 0   | last   | singleC     | OT, OT-A       |
| 242 | Yes         | 9       | 9-A  | 100    | Bozic | 0   | last   | wholeT_0.01 | OT, OT-A       |
| 243 | Yes         | 9       | 9-A  | 100    | Bozic | 0   | last   | wholeT_0.5  | OT, OT-A       |
| 244 | Yes         | 9       | 9-A  | 100    | Bozic | 0   | unif   | singleC     | OT, OT-A       |
| 245 | Yes         | 9       | 9-A  | 100    | Bozic | 0   | unif   | wholeT_0.01 | OT, OT-A       |
| 246 | Yes         | 9       | 9-A  | 100    | Bozic | 0   | unif   | wholeT_0.5  | OT, OT-A       |
| 247 | Yes         | 9       | 9-A  | 100    | Bozic | Inf | last   | singleC     | OT, OT-A       |
| 248 | Yes         | 9       | 9-A  | 100    | Bozic | Inf | last   | wholeT_0.01 | OT, OT-A       |
| 249 | Yes         | 9       | 9-A  | 100    | Bozic | Inf | last   | wholeT_0.5  | OT, OT-A       |
| 250 | Yes         | 9       | 9-A  | 100    | Bozic | Inf | unif   | singleC     | OT, OT-A       |
| 251 | Yes         | 9       | 9-A  | 100    | Bozic | Inf | unif   | wholeT_0.01 | OT, OT-A       |
| 252 | Yes         | 9       | 9-A  | 100    | Bozic | Inf | unif   | wholeT_0.5  | OT, OT-A       |
| 253 | Yes         | 9       | 9-A  | 100    | exp   | 0   | last   | singleC     | OT, OT-A       |
| 254 | Yes         | 9       | 9-A  | 100    | exp   | 0   | last   | wholeT_0.01 | OT, OT-A       |
| 255 | Yes         | 9       | 9-A  | 100    | exp   | 0   | last   | wholeT_0.5  | OT, OT-A       |
| 256 | Yes         | 9       | 9-A  | 100    | exp   | 0   | unif   | singleC     | OT, OT-A       |
| 257 | Yes         | 9       | 9-A  | 100    | exp   | 0   | unif   | wholeT_0.01 | OT, OT-A       |
| 258 | Yes         | 9       | 9-A  | 100    | exp   | 0   | unif   | wholeT_0.5  | OT, OT-A       |
| 259 | Yes         | 9       | 9-A  | 100    | exp   | Inf | last   | singleC     | OT, OT-A       |
| 260 | Yes         | 9       | 9-A  | 100    | exp   | Inf | last   | wholeT_0.01 | OT, OT-A       |
| 261 | Yes         | 9       | 9-A  | 100    | exp   | Inf | last   | wholeT_0.5  | OT, OT-A       |
| 262 | Yes         | 9       | 9-A  | 100    | exp   | Inf | unif   | singleC     | OT, OT-A       |
| 263 | Yes         | 9       | 9-A  | 100    | exp   | Inf | unif   | wholeT_0.01 | OT, OT-A       |
| 264 | Yes         | 9       | 9-A  | 100    | exp   | Inf | unif   | wholeT_0.5  | OT, OT-A       |
| 265 | Yes         | 9       | 9-A  | 100    | McF_4 | 0   | last   | singleC     | OT, OT-A       |
| 266 | Yes         | 9       | 9-A  | 100    | McF_4 | 0   | last   | wholeT_0.01 | OT, OT-A       |
| 267 | Yes         | 9       | 9-A  | 100    | McF_4 | 0   | last   | wholeT_0.5  | OT, OT-A       |
| 268 | Yes         | 9       | 9-A  | 100    | McF_4 | 0   | unif   | singleC     | OT-A           |
| 269 | Yes         | 9       | 9-A  | 100    | McF_4 | 0   | unif   | wholeT_0.01 | OT, OT-A       |
| 270 | Yes         | 9       | 9-A  | 100    | McF_4 | 0   | unif   | wholeT_0.5  | OT, OT-A       |
| 271 | Yes         | 9       | 9-A  | 100    | McF_4 | Inf | last   | singleC     | OT, OT-A       |
| 272 | Yes         | 9       | 9-A  | 100    | McF_4 | Inf | last   | wholeT_0.01 | OT             |
| 273 | Yes         | 9       | 9-A  | 100    | McF_4 | Inf | last   | wholeT_0.5  | OT, OT-A       |
| 274 | Yes         | 9       | 9-A  | 100    | McF_4 | Inf | unif   | singleC     | OT, OT-A       |
| 275 | Yes         | 9       | 9-A  | 100    | McF_4 | Inf | unif   | wholeT_0.01 | OT, OT-A       |
| 276 | Yes         | 9       | 9-A  | 100    | McF_4 | Inf | unif   | wholeT_0.5  | OT, OT-A       |
| 277 | Yes         | 9       | 9-A  | 100    | McF_6 | 0   | last   | singleC     | OT             |

Table 9: (continued)

|     | Conjunction | Drivers | Tree | S.Size | Model | sh  | S.Time | S.Type      | Best method(s)       |
|-----|-------------|---------|------|--------|-------|-----|--------|-------------|----------------------|
| 278 | Yes         | 9       | 9-A  | 100    | McF_6 | 0   | last   | wholeT_0.01 | OT                   |
| 279 | Yes         | 9       | 9-A  | 100    | McF_6 | 0   | last   | wholeT_0.5  | OT                   |
| 280 | Yes         | 9       | 9-A  | 100    | McF_6 | 0   | unif   | singleC     | OT                   |
| 281 | Yes         | 9       | 9-A  | 100    | McF_6 | 0   | unif   | wholeT_0.01 | OT, OT-A             |
| 282 | Yes         | 9       | 9-A  | 100    | McF_6 | 0   | unif   | wholeT_0.5  | OT, OT-A             |
| 283 | Yes         | 9       | 9-A  | 100    | McF_6 | Inf | last   | singleC     | OT                   |
| 284 | Yes         | 9       | 9-A  | 100    | McF_6 | Inf | last   | wholeT_0.01 | OT                   |
| 285 | Yes         | 9       | 9-A  | 100    | McF_6 | Inf | last   | wholeT_0.5  | OT                   |
| 286 | Yes         | 9       | 9-A  | 100    | McF_6 | Inf | unif   | singleC     | OT, OT-A             |
| 287 | Yes         | 9       | 9-A  | 100    | McF_6 | Inf | unif   | wholeT_0.01 | OT, OT-A             |
| 288 | Yes         | 9       | 9-A  | 100    | McF_6 | Inf | unif   | wholeT_0.5  | OT, OT-A             |
| 289 | Yes         | 7       | 7-A  | 1000   | Bozic | 0   | last   | singleC     | OT-A                 |
| 290 | Yes         | 7       | 7-A  | 1000   | Bozic | 0   | last   | wholeT_0.01 | OT-A                 |
| 291 | Yes         | 7       | 7-A  | 1000   | Bozic | 0   | last   | wholeT_0.5  | OT-A                 |
| 292 | Yes         | 7       | 7-A  | 1000   | Bozic | 0   | unif   | singleC     | OT, OT-A             |
| 293 | Yes         | 7       | 7-A  | 1000   | Bozic | 0   | unif   | wholeT_0.01 | CBN, CBN-A           |
| 294 | Yes         | 7       | 7-A  | 1000   | Bozic | 0   | unif   | wholeT_0.5  | OT, OT-A             |
| 295 | Yes         | 7       | 7-A  | 1000   | Bozic | Inf | last   | singleC     | OT-A                 |
| 296 | Yes         | 7       | 7-A  | 1000   | Bozic | Inf | last   | wholeT_0.01 | OT-A                 |
| 297 | Yes         | 7       | 7-A  | 1000   | Bozic | Inf | last   | wholeT_0.5  | OT-A                 |
| 298 | Yes         | 7       | 7-A  | 1000   | Bozic | Inf | unif   | singleC     | CBN, CBN-A           |
| 299 | Yes         | 7       | 7-A  | 1000   | Bozic | Inf | unif   | wholeT_0.01 | OT, OT-A             |
| 300 | Yes         | 7       | 7-A  | 1000   | Bozic | Inf | unif   | wholeT_0.5  | CBN, CBN-A           |
| 301 | Yes         | 7       | 7-A  | 1000   | exp   | 0   | last   | singleC     | OT-A                 |
| 302 | Yes         | 7       | 7-A  | 1000   | exp   | 0   | last   | wholeT_0.01 | OT-A                 |
| 303 | Yes         | 7       | 7-A  | 1000   | exp   | 0   | last   | wholeT_0.5  | OT-A                 |
| 304 | Yes         | 7       | 7-A  | 1000   | exp   | 0   | unif   | singleC     | OT, OT-A             |
| 305 | Yes         | 7       | 7-A  | 1000   | exp   | 0   | unif   | wholeT_0.01 | CBN, CBN-A, OT, OT-A |
| 306 | Yes         | 7       | 7-A  | 1000   | exp   | 0   | unif   | wholeT_0.5  | OT, OT-A             |
| 307 | Yes         | 7       | 7-A  | 1000   | exp   | Inf | last   | singleC     | OT-A                 |
| 308 | Yes         | 7       | 7-A  | 1000   | exp   | Inf | last   | wholeT_0.01 | OT-A                 |
| 309 | Yes         | 7       | 7-A  | 1000   | exp   | Inf | last   | wholeT_0.5  | OT-A                 |
| 310 | Yes         | 7       | 7-A  | 1000   | exp   | Inf | unif   | singleC     | CBN, CBN-A, OT       |
| 311 | Yes         | 7       | 7-A  | 1000   | exp   | Inf | unif   | wholeT_0.01 | CBN, OT, OT-A        |
| 312 | Yes         | 7       | 7-A  | 1000   | exp   | Inf | unif   | wholeT_0.5  | CBN, CBN-A           |
| 313 | Yes         | 7       | 7-A  | 1000   | McF_4 | 0   | last   | singleC     | OT-A                 |
| 314 | Yes         | 7       | 7-A  | 1000   | McF_4 | 0   | last   | wholeT_0.01 | OT-A                 |
| 315 | Yes         | 7       | 7-A  | 1000   | McF_4 | 0   | last   | wholeT_0.5  | OT-A                 |
| 316 | Yes         | 7       | 7-A  | 1000   | McF_4 | 0   | unif   | singleC     | OT, OT-A             |
| 317 | Yes         | 7       | 7-A  | 1000   | McF_4 | 0   | unif   | wholeT_0.01 | DiP-A, OT, OT-A      |

Table 9: (continued)

|     | Conjunction | Drivers | Tree | S.Size | Model | sh  | S.Time | S.Type      | Best method(s)       |
|-----|-------------|---------|------|--------|-------|-----|--------|-------------|----------------------|
| 318 | Yes         | 7       | 7-A  | 1000   | McF_4 | 0   | unif   | wholeT_0.5  | OT, OT-A             |
| 319 | Yes         | 7       | 7-A  | 1000   | McF_4 | Inf | last   | singleC     | OT-A                 |
| 320 | Yes         | 7       | 7-A  | 1000   | McF_4 | Inf | last   | wholeT_0.01 | OT-A                 |
| 321 | Yes         | 7       | 7-A  | 1000   | McF_4 | Inf | last   | wholeT_0.5  | OT-A                 |
| 322 | Yes         | 7       | 7-A  | 1000   | McF_4 | Inf | unif   | singleC     | OT, OT-A             |
| 323 | Yes         | 7       | 7-A  | 1000   | McF_4 | Inf | unif   | wholeT_0.01 | OT, OT-A             |
| 324 | Yes         | 7       | 7-A  | 1000   | McF_4 | Inf | unif   | wholeT_0.5  | OT, OT-A             |
| 325 | Yes         | 7       | 7-A  | 1000   | McF_6 | 0   | last   | singleC     | OT-A                 |
| 326 | Yes         | 7       | 7-A  | 1000   | McF_6 | 0   | last   | wholeT_0.01 | OT-A                 |
| 327 | Yes         | 7       | 7-A  | 1000   | McF_6 | 0   | last   | wholeT_0.5  | OT-A                 |
| 328 | Yes         | 7       | 7-A  | 1000   | McF_6 | 0   | unif   | singleC     | CBN-A, DiP-A         |
| 329 | Yes         | 7       | 7-A  | 1000   | McF_6 | 0   | unif   | wholeT_0.01 | CBN-A, DiP, DiP-A    |
| 330 | Yes         | 7       | 7-A  | 1000   | McF_6 | 0   | unif   | wholeT_0.5  | CBN-A                |
| 331 | Yes         | 7       | 7-A  | 1000   | McF_6 | Inf | last   | singleC     | DiP-A, OT-A          |
| 332 | Yes         | 7       | 7-A  | 1000   | McF_6 | Inf | last   | wholeT_0.01 | DiP-A, OT-A          |
| 333 | Yes         | 7       | 7-A  | 1000   | McF_6 | Inf | last   | wholeT_0.5  | DiP-A, OT-A          |
| 334 | Yes         | 7       | 7-A  | 1000   | McF_6 | Inf | unif   | singleC     | CBN-A                |
| 335 | Yes         | 7       | 7-A  | 1000   | McF_6 | Inf | unif   | wholeT_0.01 | CBN-A                |
| 336 | Yes         | 7       | 7-A  | 1000   | McF_6 | Inf | unif   | wholeT_0.5  | CBN-A                |
| 337 | Yes         | 7       | 7-A  | 200    | Bozic | 0   | last   | singleC     | OT-A                 |
| 338 | Yes         | 7       | 7-A  | 200    | Bozic | 0   | last   | wholeT_0.01 | OT-A                 |
| 339 | Yes         | 7       | 7-A  | 200    | Bozic | 0   | last   | wholeT_0.5  | OT-A                 |
| 340 | Yes         | 7       | 7-A  | 200    | Bozic | 0   | unif   | singleC     | OT, OT-A             |
| 341 | Yes         | 7       | 7-A  | 200    | Bozic | 0   | unif   | wholeT_0.01 | CBN, CBN-A, OT-A     |
| 342 | Yes         | 7       | 7-A  | 200    | Bozic | 0   | unif   | wholeT_0.5  | OT, OT-A             |
| 343 | Yes         | 7       | 7-A  | 200    | Bozic | Inf | last   | singleC     | OT-A                 |
| 344 | Yes         | 7       | 7-A  | 200    | Bozic | Inf | last   | wholeT_0.01 | OT-A                 |
| 345 | Yes         | 7       | 7-A  | 200    | Bozic | Inf | last   | wholeT_0.5  | OT-A                 |
| 346 | Yes         | 7       | 7-A  | 200    | Bozic | Inf | unif   | singleC     | CBN, CBN-A           |
| 347 | Yes         | 7       | 7-A  | 200    | Bozic | Inf | unif   | wholeT_0.01 | OT, OT-A             |
| 348 | Yes         | 7       | 7-A  | 200    | Bozic | Inf | unif   | wholeT_0.5  | CBN, CBN-A           |
| 349 | Yes         | 7       | 7-A  | 200    | exp   | 0   | last   | singleC     | OT-A                 |
| 350 | Yes         | 7       | 7-A  | 200    | exp   | 0   | last   | wholeT_0.01 | OT-A                 |
| 351 | Yes         | 7       | 7-A  | 200    | exp   | 0   | last   | wholeT_0.5  | OT-A                 |
| 352 | Yes         | 7       | 7-A  | 200    | exp   | 0   | unif   | singleC     | OT, OT-A             |
| 353 | Yes         | 7       | 7-A  | 200    | exp   | 0   | unif   | wholeT_0.01 | CBN, CBN-A, OT, OT-A |
| 354 | Yes         | 7       | 7-A  | 200    | exp   | 0   | unif   | wholeT_0.5  | OT, OT-A             |
| 355 | Yes         | 7       | 7-A  | 200    | exp   | Inf | last   | singleC     | OT-A                 |
| 356 | Yes         | 7       | 7-A  | 200    | exp   | Inf | last   | wholeT_0.01 | OT-A                 |
| 357 | Yes         | 7       | 7-A  | 200    | exp   | Inf | last   | wholeT_0.5  | OT-A                 |

Table 9: (continued)

|     | Conjunction | Drivers | Tree | S.Size | Model | sh  | S.Time | S.Type      | Best method(s)       |
|-----|-------------|---------|------|--------|-------|-----|--------|-------------|----------------------|
| 358 | Yes         | 7       | 7-A  | 200    | exp   | Inf | unif   | singleC     | CBN, CBN-A, OT, OT-A |
| 359 | Yes         | 7       | 7-A  | 200    | exp   | Inf | unif   | wholeT_0.01 | OT, OT-A             |
| 360 | Yes         | 7       | 7-A  | 200    | exp   | Inf | unif   | wholeT_0.5  | CBN, CBN-A, OT, OT-A |
| 361 | Yes         | 7       | 7-A  | 200    | McF_4 | 0   | last   | singleC     | OT-A                 |
| 362 | Yes         | 7       | 7-A  | 200    | McF_4 | 0   | last   | wholeT_0.01 | OT-A                 |
| 363 | Yes         | 7       | 7-A  | 200    | McF_4 | 0   | last   | wholeT_0.5  | OT-A                 |
| 364 | Yes         | 7       | 7-A  | 200    | McF_4 | 0   | unif   | singleC     | OT, OT-A             |
| 365 | Yes         | 7       | 7-A  | 200    | McF_4 | 0   | unif   | wholeT_0.01 | OT, OT-A             |
| 366 | Yes         | 7       | 7-A  | 200    | McF_4 | 0   | unif   | wholeT_0.5  | OT, OT-A             |
| 367 | Yes         | 7       | 7-A  | 200    | McF_4 | Inf | last   | singleC     | OT-A                 |
| 368 | Yes         | 7       | 7-A  | 200    | McF_4 | Inf | last   | wholeT_0.01 | OT-A                 |
| 369 | Yes         | 7       | 7-A  | 200    | McF_4 | Inf | last   | wholeT_0.5  | OT-A                 |
| 370 | Yes         | 7       | 7-A  | 200    | McF_4 | Inf | unif   | singleC     | OT, OT-A             |
| 371 | Yes         | 7       | 7-A  | 200    | McF_4 | Inf | unif   | wholeT_0.01 | OT, OT-A             |
| 372 | Yes         | 7       | 7-A  | 200    | McF_4 | Inf | unif   | wholeT_0.5  | OT, OT-A             |
| 373 | Yes         | 7       | 7-A  | 200    | McF_6 | 0   | last   | singleC     | OT-A                 |
| 374 | Yes         | 7       | 7-A  | 200    | McF_6 | 0   | last   | wholeT_0.01 | OT-A                 |
| 375 | Yes         | 7       | 7-A  | 200    | McF_6 | 0   | last   | wholeT_0.5  | OT-A                 |
| 376 | Yes         | 7       | 7-A  | 200    | McF_6 | 0   | unif   | singleC     | CBN-A                |
| 377 | Yes         | 7       | 7-A  | 200    | McF_6 | 0   | unif   | wholeT_0.01 | CBN-A, OT, OT-A      |
| 378 | Yes         | 7       | 7-A  | 200    | McF_6 | 0   | unif   | wholeT_0.5  | CBN-A                |
| 379 | Yes         | 7       | 7-A  | 200    | McF_6 | Inf | last   | singleC     | OT-A                 |
| 380 | Yes         | 7       | 7-A  | 200    | McF_6 | Inf | last   | wholeT_0.01 | OT-A                 |
| 381 | Yes         | 7       | 7-A  | 200    | McF_6 | Inf | last   | wholeT_0.5  | OT-A                 |
| 382 | Yes         | 7       | 7-A  | 200    | McF_6 | Inf | unif   | singleC     | CBN-A                |
| 383 | Yes         | 7       | 7-A  | 200    | McF_6 | Inf | unif   | wholeT_0.01 | CBN-A                |
| 384 | Yes         | 7       | 7-A  | 200    | McF_6 | Inf | unif   | wholeT_0.5  | CBN-A                |
| 385 | Yes         | 7       | 7-A  | 100    | Bozic | 0   | last   | singleC     | OT-A                 |
| 386 | Yes         | 7       | 7-A  | 100    | Bozic | 0   | last   | wholeT_0.01 | OT-A                 |
| 387 | Yes         | 7       | 7-A  | 100    | Bozic | 0   | last   | wholeT_0.5  | OT-A                 |
| 388 | Yes         | 7       | 7-A  | 100    | Bozic | 0   | unif   | singleC     | OT, OT-A             |
| 389 | Yes         | 7       | 7-A  | 100    | Bozic | 0   | unif   | wholeT_0.01 | CBN, CBN-A, OT, OT-A |
| 390 | Yes         | 7       | 7-A  | 100    | Bozic | 0   | unif   | wholeT_0.5  | OT, OT-A             |
| 391 | Yes         | 7       | 7-A  | 100    | Bozic | Inf | last   | singleC     | OT-A                 |
| 392 | Yes         | 7       | 7-A  | 100    | Bozic | Inf | last   | wholeT_0.01 | OT-A                 |
| 393 | Yes         | 7       | 7-A  | 100    | Bozic | Inf | last   | wholeT_0.5  | OT-A                 |
| 394 | Yes         | 7       | 7-A  | 100    | Bozic | Inf | unif   | singleC     | CBN, CBN-A           |
| 395 | Yes         | 7       | 7-A  | 100    | Bozic | Inf | unif   | wholeT_0.01 | CBN, CBN-A, OT, OT-A |
| 396 | Yes         | 7       | 7-A  | 100    | Bozic | Inf | unif   | wholeT_0.5  | CBN, CBN-A           |
| 397 | Yes         | 7       | 7-A  | 100    | exp   | 0   | last   | singleC     | OT-A                 |

Table 9: (continued)

|     | Conjunction | Drivers | Tree | S.Size | Model | sh  | S.Time | S.Type      | Best method(s)       |
|-----|-------------|---------|------|--------|-------|-----|--------|-------------|----------------------|
| 398 | Yes         | 7       | 7-A  | 100    | exp   | 0   | last   | wholeT_0.01 | OT-A                 |
| 399 | Yes         | 7       | 7-A  | 100    | exp   | 0   | last   | wholeT_0.5  | OT-A                 |
| 400 | Yes         | 7       | 7-A  | 100    | exp   | 0   | unif   | singleC     | OT, OT-A             |
| 401 | Yes         | 7       | 7-A  | 100    | exp   | 0   | unif   | wholeT_0.01 | CBN, OT, OT-A        |
| 402 | Yes         | 7       | 7-A  | 100    | exp   | 0   | unif   | wholeT_0.5  | OT, OT-A             |
| 403 | Yes         | 7       | 7-A  | 100    | exp   | Inf | last   | singleC     | OT-A                 |
| 404 | Yes         | 7       | 7-A  | 100    | exp   | Inf | last   | wholeT_0.01 | OT-A                 |
| 405 | Yes         | 7       | 7-A  | 100    | exp   | Inf | last   | wholeT_0.5  | OT-A                 |
| 406 | Yes         | 7       | 7-A  | 100    | exp   | Inf | unif   | singleC     | CBN-A, OT, OT-A      |
| 407 | Yes         | 7       | 7-A  | 100    | exp   | Inf | unif   | wholeT_0.01 | OT, OT-A             |
| 408 | Yes         | 7       | 7-A  | 100    | exp   | Inf | unif   | wholeT_0.5  | CBN, OT, OT-A        |
| 409 | Yes         | 7       | 7-A  | 100    | McF_4 | 0   | last   | singleC     | OT-A                 |
| 410 | Yes         | 7       | 7-A  | 100    | McF_4 | 0   | last   | wholeT_0.01 | OT-A                 |
| 411 | Yes         | 7       | 7-A  | 100    | McF_4 | 0   | last   | wholeT_0.5  | OT-A                 |
| 412 | Yes         | 7       | 7-A  | 100    | McF_4 | 0   | unif   | singleC     | OT, OT-A             |
| 413 | Yes         | 7       | 7-A  | 100    | McF_4 | 0   | unif   | wholeT_0.01 | OT, OT-A             |
| 414 | Yes         | 7       | 7-A  | 100    | McF_4 | 0   | unif   | wholeT_0.5  | OT, OT-A             |
| 415 | Yes         | 7       | 7-A  | 100    | McF_4 | Inf | last   | singleC     | OT-A                 |
| 416 | Yes         | 7       | 7-A  | 100    | McF_4 | Inf | last   | wholeT_0.01 | OT-A                 |
| 417 | Yes         | 7       | 7-A  | 100    | McF_4 | Inf | last   | wholeT_0.5  | OT-A                 |
| 418 | Yes         | 7       | 7-A  | 100    | McF_4 | Inf | unif   | singleC     | OT, OT-A             |
| 419 | Yes         | 7       | 7-A  | 100    | McF_4 | Inf | unif   | wholeT_0.01 | OT-A                 |
| 420 | Yes         | 7       | 7-A  | 100    | McF_4 | Inf | unif   | wholeT_0.5  | OT, OT-A             |
| 421 | Yes         | 7       | 7-A  | 100    | McF_6 | 0   | last   | singleC     | OT-A                 |
| 422 | Yes         | 7       | 7-A  | 100    | McF_6 | 0   | last   | wholeT_0.01 | OT-A                 |
| 423 | Yes         | 7       | 7-A  | 100    | McF_6 | 0   | last   | wholeT_0.5  | OT-A                 |
| 424 | Yes         | 7       | 7-A  | 100    | McF_6 | 0   | unif   | singleC     | CBN, CBN-A           |
| 425 | Yes         | 7       | 7-A  | 100    | McF_6 | 0   | unif   | wholeT_0.01 | CBN, CBN-A, OT, OT-A |
| 426 | Yes         | 7       | 7-A  | 100    | McF_6 | 0   | unif   | wholeT_0.5  | CBN-A                |
| 427 | Yes         | 7       | 7-A  | 100    | McF_6 | Inf | last   | singleC     | OT-A                 |
| 428 | Yes         | 7       | 7-A  | 100    | McF_6 | Inf | last   | wholeT_0.01 | OT-A                 |
| 429 | Yes         | 7       | 7-A  | 100    | McF_6 | Inf | last   | wholeT_0.5  | OT-A                 |
| 430 | Yes         | 7       | 7-A  | 100    | McF_6 | Inf | unif   | singleC     | CBN-A                |
| 431 | Yes         | 7       | 7-A  | 100    | McF_6 | Inf | unif   | wholeT_0.01 | CBN-A                |
| 432 | Yes         | 7       | 7-A  | 100    | McF_6 | Inf | unif   | wholeT_0.5  | CBN-A                |
| 433 | No          | 11      | 11-B | 1000   | Bozic | 0   | last   | singleC     | OT, OT-A             |
| 434 | No          | 11      | 11-B | 1000   | Bozic | 0   | last   | wholeT_0.01 | OT, OT-A             |
| 435 | No          | 11      | 11-B | 1000   | Bozic | 0   | last   | wholeT_0.5  | OT, OT-A             |
| 436 | No          | 11      | 11-B | 1000   | Bozic | 0   | unif   | singleC     | OT, OT-A             |
| 437 | No          | 11      | 11-B | 1000   | Bozic | 0   | unif   | wholeT_0.01 | OT, OT-A             |

Table 9: (continued)

|     | Conjunction | Drivers | Tree | S.Size | Model | sh  | S.Time | S.Type      | Best method(s)       |
|-----|-------------|---------|------|--------|-------|-----|--------|-------------|----------------------|
| 438 | No          | 11      | 11-B | 1000   | Bozic | 0   | unif   | wholeT_0.5  | OT, OT-A             |
| 439 | No          | 11      | 11-B | 1000   | Bozic | Inf | last   | singleC     | OT, OT-A             |
| 440 | No          | 11      | 11-B | 1000   | Bozic | Inf | last   | wholeT_0.01 | DiP-A                |
| 441 | No          | 11      | 11-B | 1000   | Bozic | Inf | last   | wholeT_0.5  | OT, OT-A             |
| 442 | No          | 11      | 11-B | 1000   | Bozic | Inf | unif   | singleC     | OT, OT-A             |
| 443 | No          | 11      | 11-B | 1000   | Bozic | Inf | unif   | wholeT_0.01 | OT, OT-A             |
| 444 | No          | 11      | 11-B | 1000   | Bozic | Inf | unif   | wholeT_0.5  | OT, OT-A             |
| 445 | No          | 11      | 11-B | 1000   | exp   | 0   | last   | singleC     | OT, OT-A             |
| 446 | No          | 11      | 11-B | 1000   | exp   | 0   | last   | wholeT_0.01 | OT, OT-A             |
| 447 | No          | 11      | 11-B | 1000   | exp   | 0   | last   | wholeT_0.5  | OT, OT-A             |
| 448 | No          | 11      | 11-B | 1000   | exp   | 0   | unif   | singleC     | OT, OT-A             |
| 449 | No          | 11      | 11-B | 1000   | exp   | 0   | unif   | wholeT_0.01 | OT, OT-A             |
| 450 | No          | 11      | 11-B | 1000   | exp   | 0   | unif   | wholeT_0.5  | OT, OT-A             |
| 451 | No          | 11      | 11-B | 1000   | exp   | Inf | last   | singleC     | OT, OT-A             |
| 452 | No          | 11      | 11-B | 1000   | exp   | Inf | last   | wholeT_0.01 | OT, OT-A             |
| 453 | No          | 11      | 11-B | 1000   | exp   | Inf | last   | wholeT_0.5  | OT, OT-A             |
| 454 | No          | 11      | 11-B | 1000   | exp   | Inf | unif   | singleC     | OT, OT-A             |
| 455 | No          | 11      | 11-B | 1000   | exp   | Inf | unif   | wholeT_0.01 | OT, OT-A             |
| 456 | No          | 11      | 11-B | 1000   | exp   | Inf | unif   | wholeT_0.5  | OT, OT-A             |
| 457 | No          | 11      | 11-B | 1000   | McF_4 | 0   | last   | singleC     | OT, OT-A             |
| 458 | No          | 11      | 11-B | 1000   | McF_4 | 0   | last   | wholeT_0.01 | DiP, DiP-A, OT, OT-A |
| 459 | No          | 11      | 11-B | 1000   | McF_4 | 0   | last   | wholeT_0.5  | OT, OT-A             |
| 460 | No          | 11      | 11-B | 1000   | McF_4 | 0   | unif   | singleC     | OT, OT-A             |
| 461 | No          | 11      | 11-B | 1000   | McF_4 | 0   | unif   | wholeT_0.01 | OT, OT-A             |
| 462 | No          | 11      | 11-B | 1000   | McF_4 | 0   | unif   | wholeT_0.5  | OT, OT-A             |
| 463 | No          | 11      | 11-B | 1000   | McF_4 | Inf | last   | singleC     | OT, OT-A             |
| 464 | No          | 11      | 11-B | 1000   | McF_4 | Inf | last   | wholeT_0.01 | OT, OT-A             |
| 465 | No          | 11      | 11-B | 1000   | McF_4 | Inf | last   | wholeT_0.5  | OT, OT-A             |
| 466 | No          | 11      | 11-B | 1000   | McF_4 | Inf | unif   | singleC     | OT, OT-A             |
| 467 | No          | 11      | 11-B | 1000   | McF_4 | Inf | unif   | wholeT_0.01 | OT, OT-A             |
| 468 | No          | 11      | 11-B | 1000   | McF_4 | Inf | unif   | wholeT_0.5  | OT, OT-A             |
| 469 | No          | 11      | 11-B | 1000   | McF_6 | 0   | last   | singleC     | DiP, OT              |
| 470 | No          | 11      | 11-B | 1000   | McF_6 | 0   | last   | wholeT_0.01 | DiP, OT              |
| 471 | No          | 11      | 11-B | 1000   | McF_6 | 0   | last   | wholeT_0.5  | DiP, OT              |
| 472 | No          | 11      | 11-B | 1000   | McF_6 | 0   | unif   | singleC     | DiP, DiP-A, OT, OT-A |
| 473 | No          | 11      | 11-B | 1000   | McF_6 | 0   | unif   | wholeT_0.01 | DiP, DiP-A, OT       |
| 474 | No          | 11      | 11-B | 1000   | McF_6 | 0   | unif   | wholeT_0.5  | DiP, DiP-A           |
| 475 | No          | 11      | 11-B | 1000   | McF_6 | Inf | last   | singleC     | DiP, OT              |
| 476 | No          | 11      | 11-B | 1000   | McF_6 | Inf | last   | wholeT_0.01 | OT                   |
| 477 | No          | 11      | 11-B | 1000   | McF_6 | Inf | last   | wholeT_0.5  | DiP, OT              |



Table 9: (continued)

|     | Conjunction | Drivers | Tree | S.Size | Model | sh  | S.Time | S.Type      | Best method(s)   |
|-----|-------------|---------|------|--------|-------|-----|--------|-------------|------------------|
| 478 | No          | 11      | 11-B | 1000   | McF_6 | Inf | unif   | singleC     | DiP, DiP-A       |
| 479 | No          | 11      | 11-B | 1000   | McF_6 | Inf | unif   | wholeT_0.01 | DiP, DiP-A       |
| 480 | No          | 11      | 11-B | 1000   | McF_6 | Inf | unif   | wholeT_0.5  | DiP, DiP-A, OT-A |
| 481 | No          | 11      | 11-B | 200    | Bozic | 0   | last   | singleC     | OT, OT-A         |
| 482 | No          | 11      | 11-B | 200    | Bozic | 0   | last   | wholeT_0.01 | OT, OT-A         |
| 483 | No          | 11      | 11-B | 200    | Bozic | 0   | last   | wholeT_0.5  | OT, OT-A         |
| 484 | No          | 11      | 11-B | 200    | Bozic | 0   | unif   | singleC     | OT, OT-A         |
| 485 | No          | 11      | 11-B | 200    | Bozic | 0   | unif   | wholeT_0.01 | OT, OT-A         |
| 486 | No          | 11      | 11-B | 200    | Bozic | 0   | unif   | wholeT_0.5  | OT, OT-A         |
| 487 | No          | 11      | 11-B | 200    | Bozic | Inf | last   | singleC     | OT, OT-A         |
| 488 | No          | 11      | 11-B | 200    | Bozic | Inf | last   | wholeT_0.01 | OT, OT-A         |
| 489 | No          | 11      | 11-B | 200    | Bozic | Inf | last   | wholeT_0.5  | OT, OT-A         |
| 490 | No          | 11      | 11-B | 200    | Bozic | Inf | unif   | singleC     | OT, OT-A         |
| 491 | No          | 11      | 11-B | 200    | Bozic | Inf | unif   | wholeT_0.01 | OT, OT-A         |
| 492 | No          | 11      | 11-B | 200    | Bozic | Inf | unif   | wholeT_0.5  | OT, OT-A         |
| 493 | No          | 11      | 11-B | 200    | exp   | 0   | last   | singleC     | OT, OT-A         |
| 494 | No          | 11      | 11-B | 200    | exp   | 0   | last   | wholeT_0.01 | OT, OT-A         |
| 495 | No          | 11      | 11-B | 200    | exp   | 0   | last   | wholeT_0.5  | OT, OT-A         |
| 496 | No          | 11      | 11-B | 200    | exp   | 0   | unif   | singleC     | OT, OT-A         |
| 497 | No          | 11      | 11-B | 200    | exp   | 0   | unif   | wholeT_0.01 | OT, OT-A         |
| 498 | No          | 11      | 11-B | 200    | exp   | 0   | unif   | wholeT_0.5  | OT, OT-A         |
| 499 | No          | 11      | 11-B | 200    | exp   | Inf | last   | singleC     | OT, OT-A         |
| 500 | No          | 11      | 11-B | 200    | exp   | Inf | last   | wholeT_0.01 | OT, OT-A         |
| 501 | No          | 11      | 11-B | 200    | exp   | Inf | last   | wholeT_0.5  | OT, OT-A         |
| 502 | No          | 11      | 11-B | 200    | exp   | Inf | unif   | singleC     | OT, OT-A         |
| 503 | No          | 11      | 11-B | 200    | exp   | Inf | unif   | wholeT_0.01 | OT               |
| 504 | No          | 11      | 11-B | 200    | exp   | Inf | unif   | wholeT_0.5  | OT, OT-A         |
| 505 | No          | 11      | 11-B | 200    | McF_4 | 0   | last   | singleC     | OT, OT-A         |
| 506 | No          | 11      | 11-B | 200    | McF_4 | 0   | last   | wholeT_0.01 | OT, OT-A         |
| 507 | No          | 11      | 11-B | 200    | McF_4 | 0   | last   | wholeT_0.5  | OT, OT-A         |
| 508 | No          | 11      | 11-B | 200    | McF_4 | 0   | unif   | singleC     | OT, OT-A         |
| 509 | No          | 11      | 11-B | 200    | McF_4 | 0   | unif   | wholeT_0.01 | OT, OT-A         |
| 510 | No          | 11      | 11-B | 200    | McF_4 | 0   | unif   | wholeT_0.5  | OT, OT-A         |
| 511 | No          | 11      | 11-B | 200    | McF_4 | Inf | last   | singleC     | OT, OT-A         |
| 512 | No          | 11      | 11-B | 200    | McF_4 | Inf | last   | wholeT_0.01 | OT, OT-A         |
| 513 | No          | 11      | 11-B | 200    | McF_4 | Inf | last   | wholeT_0.5  | OT, OT-A         |
| 514 | No          | 11      | 11-B | 200    | McF_4 | Inf | unif   | singleC     | OT, OT-A         |
| 515 | No          | 11      | 11-B | 200    | McF_4 | Inf | unif   | wholeT_0.01 | OT, OT-A         |
| 516 | No          | 11      | 11-B | 200    | McF_4 | Inf | unif   | wholeT_0.5  | OT, OT-A         |
| 517 | No          | 11      | 11-B | 200    | McF_6 | 0   | last   | singleC     | OT               |

Table 9: (continued)

|     | Conjunction | Drivers | Tree | S.Size | Model | sh  | S.Time | S.Type      | Best method(s) |
|-----|-------------|---------|------|--------|-------|-----|--------|-------------|----------------|
| 518 | No          | 11      | 11-B | 200    | McF_6 | 0   | last   | wholeT_0.01 | OT             |
| 519 | No          | 11      | 11-B | 200    | McF_6 | 0   | last   | wholeT_0.5  | OT             |
| 520 | No          | 11      | 11-B | 200    | McF_6 | 0   | unif   | singleC     | OT, OT-A       |
| 521 | No          | 11      | 11-B | 200    | McF_6 | 0   | unif   | wholeT_0.01 | OT, OT-A       |
| 522 | No          | 11      | 11-B | 200    | McF_6 | 0   | unif   | wholeT_0.5  | OT, OT-A       |
| 523 | No          | 11      | 11-B | 200    | McF_6 | Inf | last   | singleC     | OT             |
| 524 | No          | 11      | 11-B | 200    | McF_6 | Inf | last   | wholeT_0.01 | OT             |
| 525 | No          | 11      | 11-B | 200    | McF_6 | Inf | last   | wholeT_0.5  | OT             |
| 526 | No          | 11      | 11-B | 200    | McF_6 | Inf | unif   | singleC     | OT, OT-A       |
| 527 | No          | 11      | 11-B | 200    | McF_6 | Inf | unif   | wholeT_0.01 | OT, OT-A       |
| 528 | No          | 11      | 11-B | 200    | McF_6 | Inf | unif   | wholeT_0.5  | OT, OT-A       |
| 529 | No          | 11      | 11-B | 100    | Bozic | 0   | last   | singleC     | OT, OT-A       |
| 530 | No          | 11      | 11-B | 100    | Bozic | 0   | last   | wholeT_0.01 | OT, OT-A       |
| 531 | No          | 11      | 11-B | 100    | Bozic | 0   | last   | wholeT_0.5  | OT, OT-A       |
| 532 | No          | 11      | 11-B | 100    | Bozic | 0   | unif   | singleC     | OT, OT-A       |
| 533 | No          | 11      | 11-B | 100    | Bozic | 0   | unif   | wholeT_0.01 | OT, OT-A       |
| 534 | No          | 11      | 11-B | 100    | Bozic | 0   | unif   | wholeT_0.5  | OT, OT-A       |
| 535 | No          | 11      | 11-B | 100    | Bozic | Inf | last   | singleC     | OT, OT-A       |
| 536 | No          | 11      | 11-B | 100    | Bozic | Inf | last   | wholeT_0.01 | OT, OT-A       |
| 537 | No          | 11      | 11-B | 100    | Bozic | Inf | last   | wholeT_0.5  | OT, OT-A       |
| 538 | No          | 11      | 11-B | 100    | Bozic | Inf | unif   | singleC     | OT, OT-A       |
| 539 | No          | 11      | 11-B | 100    | Bozic | Inf | unif   | wholeT_0.01 | OT, OT-A       |
| 540 | No          | 11      | 11-B | 100    | Bozic | Inf | unif   | wholeT_0.5  | OT, OT-A       |
| 541 | No          | 11      | 11-B | 100    | exp   | 0   | last   | singleC     | OT, OT-A       |
| 542 | No          | 11      | 11-B | 100    | exp   | 0   | last   | wholeT_0.01 | OT, OT-A       |
| 543 | No          | 11      | 11-B | 100    | exp   | 0   | last   | wholeT_0.5  | OT, OT-A       |
| 544 | No          | 11      | 11-B | 100    | exp   | 0   | unif   | singleC     | OT, OT-A       |
| 545 | No          | 11      | 11-B | 100    | exp   | 0   | unif   | wholeT_0.01 | OT, OT-A       |
| 546 | No          | 11      | 11-B | 100    | exp   | 0   | unif   | wholeT_0.5  | OT, OT-A       |
| 547 | No          | 11      | 11-B | 100    | exp   | Inf | last   | singleC     | OT, OT-A       |
| 548 | No          | 11      | 11-B | 100    | exp   | Inf | last   | wholeT_0.01 | OT, OT-A       |
| 549 | No          | 11      | 11-B | 100    | exp   | Inf | last   | wholeT_0.5  | OT, OT-A       |
| 550 | No          | 11      | 11-B | 100    | exp   | Inf | unif   | singleC     | OT, OT-A       |
| 551 | No          | 11      | 11-B | 100    | exp   | Inf | unif   | wholeT_0.01 | OT, OT-A       |
| 552 | No          | 11      | 11-B | 100    | exp   | Inf | unif   | wholeT_0.5  | OT, OT-A       |
| 553 | No          | 11      | 11-B | 100    | McF_4 | 0   | last   | singleC     | OT, OT-A       |
| 554 | No          | 11      | 11-B | 100    | McF_4 | 0   | last   | wholeT_0.01 | OT, OT-A       |
| 555 | No          | 11      | 11-B | 100    | McF_4 | 0   | last   | wholeT_0.5  | OT, OT-A       |
| 556 | No          | 11      | 11-B | 100    | McF_4 | 0   | unif   | singleC     | OT, OT-A       |
| 557 | No          | 11      | 11-B | 100    | McF_4 | 0   | unif   | wholeT_0.01 | OT, OT-A       |

Table 9: (continued)

|     | Conjunction | Drivers | Tree | S.Size | Model | sh  | S.Time | S.Type      | Best method(s)         |
|-----|-------------|---------|------|--------|-------|-----|--------|-------------|------------------------|
| 558 | No          | 11      | 11-B | 100    | McF_4 | 0   | unif   | wholeT_0.5  | OT, OT-A               |
| 559 | No          | 11      | 11-B | 100    | McF_4 | Inf | last   | singleC     | OT, OT-A               |
| 560 | No          | 11      | 11-B | 100    | McF_4 | Inf | last   | wholeT_0.01 | OT, OT-A               |
| 561 | No          | 11      | 11-B | 100    | McF_4 | Inf | last   | wholeT_0.5  | OT, OT-A               |
| 562 | No          | 11      | 11-B | 100    | McF_4 | Inf | unif   | singleC     | OT, OT-A               |
| 563 | No          | 11      | 11-B | 100    | McF_4 | Inf | unif   | wholeT_0.01 | OT, OT-A               |
| 564 | No          | 11      | 11-B | 100    | McF_4 | Inf | unif   | wholeT_0.5  | OT, OT-A               |
| 565 | No          | 11      | 11-B | 100    | McF_6 | 0   | last   | singleC     | OT                     |
| 566 | No          | 11      | 11-B | 100    | McF_6 | 0   | last   | wholeT_0.01 | OT                     |
| 567 | No          | 11      | 11-B | 100    | McF_6 | 0   | last   | wholeT_0.5  | OT                     |
| 568 | No          | 11      | 11-B | 100    | McF_6 | 0   | unif   | singleC     | OT, OT-A               |
| 569 | No          | 11      | 11-B | 100    | McF_6 | 0   | unif   | wholeT_0.01 | OT, OT-A               |
| 570 | No          | 11      | 11-B | 100    | McF_6 | 0   | unif   | wholeT_0.5  | OT, OT-A               |
| 571 | No          | 11      | 11-B | 100    | McF_6 | Inf | last   | singleC     | OT                     |
| 572 | No          | 11      | 11-B | 100    | McF_6 | Inf | last   | wholeT_0.01 | OT, OT-A               |
| 573 | No          | 11      | 11-B | 100    | McF_6 | Inf | last   | wholeT_0.5  | OT                     |
| 574 | No          | 11      | 11-B | 100    | McF_6 | Inf | unif   | singleC     | OT, OT-A               |
| 575 | No          | 11      | 11-B | 100    | McF_6 | Inf | unif   | wholeT_0.01 | OT, OT-A               |
| 576 | No          | 11      | 11-B | 100    | McF_6 | Inf | unif   | wholeT_0.5  | OT, OT-A               |
| 577 | No          | 9       | 9-B  | 1000   | Bozic | 0   | last   | singleC     | OT, OT-A               |
| 578 | No          | 9       | 9-B  | 1000   | Bozic | 0   | last   | wholeT_0.01 | OT, OT-A               |
| 579 | No          | 9       | 9-B  | 1000   | Bozic | 0   | last   | wholeT_0.5  | OT-A                   |
| 580 | No          | 9       | 9-B  | 1000   | Bozic | 0   | unif   | singleC     | OT, OT-A               |
| 581 | No          | 9       | 9-B  | 1000   | Bozic | 0   | unif   | wholeT_0.01 | OT, OT-A               |
| 582 | No          | 9       | 9-B  | 1000   | Bozic | 0   | unif   | wholeT_0.5  | OT, OT-A               |
| 583 | No          | 9       | 9-B  | 1000   | Bozic | Inf | last   | singleC     | OT, OT-A               |
| 584 | No          | 9       | 9-B  | 1000   | Bozic | Inf | last   | wholeT_0.01 | DiP, DiP-A             |
| 585 | No          | 9       | 9-B  | 1000   | Bozic | Inf | last   | wholeT_0.5  | OT, OT-A               |
| 586 | No          | 9       | 9-B  | 1000   | Bozic | Inf | unif   | singleC     | OT, OT-A               |
| 587 | No          | 9       | 9-B  | 1000   | Bozic | Inf | unif   | wholeT_0.01 | OT, OT-A               |
| 588 | No          | 9       | 9-B  | 1000   | Bozic | Inf | unif   | wholeT_0.5  | OT, OT-A               |
| 589 | No          | 9       | 9-B  | 1000   | exp   | 0   | last   | singleC     | OT, OT-A               |
| 590 | No          | 9       | 9-B  | 1000   | exp   | 0   | last   | wholeT_0.01 | OT, OT-A               |
| 591 | No          | 9       | 9-B  | 1000   | exp   | 0   | last   | wholeT_0.5  | OT, OT-A               |
| 592 | No          | 9       | 9-B  | 1000   | exp   | 0   | unif   | singleC     | OT                     |
| 593 | No          | 9       | 9-B  | 1000   | exp   | 0   | unif   | wholeT_0.01 | OT, OT-A               |
| 594 | No          | 9       | 9-B  | 1000   | exp   | 0   | unif   | wholeT_0.5  | OT, OT-A               |
| 595 | No          | 9       | 9-B  | 1000   | exp   | Inf | last   | singleC     | OT, OT-A               |
| 596 | No          | 9       | 9-B  | 1000   | exp   | Inf | last   | wholeT_0.01 | CBN-A, DiP-A, OT, OT-A |
| 597 | No          | 9       | 9-B  | 1000   | exp   | Inf | last   | wholeT_0.5  | OT, OT-A               |

Table 9: (continued)

|     | Conjunction | Drivers | Tree | S.Size | Model | sh  | S.Time | S.Type      | Best method(s)       |
|-----|-------------|---------|------|--------|-------|-----|--------|-------------|----------------------|
| 598 | No          | 9       | 9-B  | 1000   | exp   | Inf | unif   | singleC     | OT, OT-A             |
| 599 | No          | 9       | 9-B  | 1000   | exp   | Inf | unif   | wholeT_0.01 | OT, OT-A             |
| 600 | No          | 9       | 9-B  | 1000   | exp   | Inf | unif   | wholeT_0.5  | OT, OT-A             |
| 601 | No          | 9       | 9-B  | 1000   | McF_4 | 0   | last   | singleC     | OT, OT-A             |
| 602 | No          | 9       | 9-B  | 1000   | McF_4 | 0   | last   | wholeT_0.01 | DiP, DiP-A, OT, OT-A |
| 603 | No          | 9       | 9-B  | 1000   | McF_4 | 0   | last   | wholeT_0.5  | OT, OT-A             |
| 604 | No          | 9       | 9-B  | 1000   | McF_4 | 0   | unif   | singleC     | OT, OT-A             |
| 605 | No          | 9       | 9-B  | 1000   | McF_4 | 0   | unif   | wholeT_0.01 | OT, OT-A             |
| 606 | No          | 9       | 9-B  | 1000   | McF_4 | 0   | unif   | wholeT_0.5  | OT, OT-A             |
| 607 | No          | 9       | 9-B  | 1000   | McF_4 | Inf | last   | singleC     | OT, OT-A             |
| 608 | No          | 9       | 9-B  | 1000   | McF_4 | Inf | last   | wholeT_0.01 | DiP, DiP-A, OT, OT-A |
| 609 | No          | 9       | 9-B  | 1000   | McF_4 | Inf | last   | wholeT_0.5  | OT, OT-A             |
| 610 | No          | 9       | 9-B  | 1000   | McF_4 | Inf | unif   | singleC     | OT-A                 |
| 611 | No          | 9       | 9-B  | 1000   | McF_4 | Inf | unif   | wholeT_0.01 | OT, OT-A             |
| 612 | No          | 9       | 9-B  | 1000   | McF_4 | Inf | unif   | wholeT_0.5  | OT, OT-A             |
| 613 | No          | 9       | 9-B  | 1000   | McF_6 | 0   | last   | singleC     | OT                   |
| 614 | No          | 9       | 9-B  | 1000   | McF_6 | 0   | last   | wholeT_0.01 | OT                   |
| 615 | No          | 9       | 9-B  | 1000   | McF_6 | 0   | last   | wholeT_0.5  | OT                   |
| 616 | No          | 9       | 9-B  | 1000   | McF_6 | 0   | unif   | singleC     | DiP, DiP-A, OT, OT-A |
| 617 | No          | 9       | 9-B  | 1000   | McF_6 | 0   | unif   | wholeT_0.01 | DiP, DiP-A, OT, OT-A |
| 618 | No          | 9       | 9-B  | 1000   | McF_6 | 0   | unif   | wholeT_0.5  | DiP, DiP-A, OT, OT-A |
| 619 | No          | 9       | 9-B  | 1000   | McF_6 | Inf | last   | singleC     | DiP, DiP-A, OT-A     |
| 620 | No          | 9       | 9-B  | 1000   | McF_6 | Inf | last   | wholeT_0.01 | DiP, DiP-A, OT-A     |
| 621 | No          | 9       | 9-B  | 1000   | McF_6 | Inf | last   | wholeT_0.5  | DiP, DiP-A, OT-A     |
| 622 | No          | 9       | 9-B  | 1000   | McF_6 | Inf | unif   | singleC     | DiP, DiP-A, OT, OT-A |
| 623 | No          | 9       | 9-B  | 1000   | McF_6 | Inf | unif   | wholeT_0.01 | DiP, DiP-A, OT, OT-A |
| 624 | No          | 9       | 9-B  | 1000   | McF_6 | Inf | unif   | wholeT_0.5  | DiP, DiP-A, OT, OT-A |
| 625 | No          | 9       | 9-B  | 200    | Bozic | 0   | last   | singleC     | OT, OT-A             |
| 626 | No          | 9       | 9-B  | 200    | Bozic | 0   | last   | wholeT_0.01 | OT, OT-A             |
| 627 | No          | 9       | 9-B  | 200    | Bozic | 0   | last   | wholeT_0.5  | OT, OT-A             |
| 628 | No          | 9       | 9-B  | 200    | Bozic | 0   | unif   | singleC     | OT, OT-A             |
| 629 | No          | 9       | 9-B  | 200    | Bozic | 0   | unif   | wholeT_0.01 | OT, OT-A             |
| 630 | No          | 9       | 9-B  | 200    | Bozic | 0   | unif   | wholeT_0.5  | OT, OT-A             |
| 631 | No          | 9       | 9-B  | 200    | Bozic | Inf | last   | singleC     | OT, OT-A             |
| 632 | No          | 9       | 9-B  | 200    | Bozic | Inf | last   | wholeT_0.01 | OT, OT-A             |
| 633 | No          | 9       | 9-B  | 200    | Bozic | Inf | last   | wholeT_0.5  | OT, OT-A             |
| 634 | No          | 9       | 9-B  | 200    | Bozic | Inf | unif   | singleC     | OT, OT-A             |
| 635 | No          | 9       | 9-B  | 200    | Bozic | Inf | unif   | wholeT_0.01 | OT, OT-A             |
| 636 | No          | 9       | 9-B  | 200    | Bozic | Inf | unif   | wholeT_0.5  | OT, OT-A             |
| 637 | No          | 9       | 9-B  | 200    | exp   | 0   | last   | singleC     | OT, OT-A             |

Table 9: (continued)

|     | Conjunction | Drivers | Tree | S.Size | Model | sh  | S.Time | S.Type      | Best method(s) |
|-----|-------------|---------|------|--------|-------|-----|--------|-------------|----------------|
| 638 | No          | 9       | 9-B  | 200    | exp   | 0   | last   | wholeT_0.01 | OT, OT-A       |
| 639 | No          | 9       | 9-B  | 200    | exp   | 0   | last   | wholeT_0.5  | OT, OT-A       |
| 640 | No          | 9       | 9-B  | 200    | exp   | 0   | unif   | singleC     | OT, OT-A       |
| 641 | No          | 9       | 9-B  | 200    | exp   | 0   | unif   | wholeT_0.01 | OT, OT-A       |
| 642 | No          | 9       | 9-B  | 200    | exp   | 0   | unif   | wholeT_0.5  | OT, OT-A       |
| 643 | No          | 9       | 9-B  | 200    | exp   | Inf | last   | singleC     | OT, OT-A       |
| 644 | No          | 9       | 9-B  | 200    | exp   | Inf | last   | wholeT_0.01 | OT, OT-A       |
| 645 | No          | 9       | 9-B  | 200    | exp   | Inf | last   | wholeT_0.5  | OT, OT-A       |
| 646 | No          | 9       | 9-B  | 200    | exp   | Inf | unif   | singleC     | OT, OT-A       |
| 647 | No          | 9       | 9-B  | 200    | exp   | Inf | unif   | wholeT_0.01 | OT, OT-A       |
| 648 | No          | 9       | 9-B  | 200    | exp   | Inf | unif   | wholeT_0.5  | OT, OT-A       |
| 649 | No          | 9       | 9-B  | 200    | McF_4 | 0   | last   | singleC     | OT, OT-A       |
| 650 | No          | 9       | 9-B  | 200    | McF_4 | 0   | last   | wholeT_0.01 | OT, OT-A       |
| 651 | No          | 9       | 9-B  | 200    | McF_4 | 0   | last   | wholeT_0.5  | OT, OT-A       |
| 652 | No          | 9       | 9-B  | 200    | McF_4 | 0   | unif   | singleC     | OT, OT-A       |
| 653 | No          | 9       | 9-B  | 200    | McF_4 | 0   | unif   | wholeT_0.01 | OT, OT-A       |
| 654 | No          | 9       | 9-B  | 200    | McF_4 | 0   | unif   | wholeT_0.5  | OT, OT-A       |
| 655 | No          | 9       | 9-B  | 200    | McF_4 | Inf | last   | singleC     | OT, OT-A       |
| 656 | No          | 9       | 9-B  | 200    | McF_4 | Inf | last   | wholeT_0.01 | OT, OT-A       |
| 657 | No          | 9       | 9-B  | 200    | McF_4 | Inf | last   | wholeT_0.5  | OT, OT-A       |
| 658 | No          | 9       | 9-B  | 200    | McF_4 | Inf | unif   | singleC     | OT, OT-A       |
| 659 | No          | 9       | 9-B  | 200    | McF_4 | Inf | unif   | wholeT_0.01 | OT, OT-A       |
| 660 | No          | 9       | 9-B  | 200    | McF_4 | Inf | unif   | wholeT_0.5  | OT, OT-A       |
| 661 | No          | 9       | 9-B  | 200    | McF_6 | 0   | last   | singleC     | OT, OT-A       |
| 662 | No          | 9       | 9-B  | 200    | McF_6 | 0   | last   | wholeT_0.01 | OT, OT-A       |
| 663 | No          | 9       | 9-B  | 200    | McF_6 | 0   | last   | wholeT_0.5  | OT, OT-A       |
| 664 | No          | 9       | 9-B  | 200    | McF_6 | 0   | unif   | singleC     | OT, OT-A       |
| 665 | No          | 9       | 9-B  | 200    | McF_6 | 0   | unif   | wholeT_0.01 | OT, OT-A       |
| 666 | No          | 9       | 9-B  | 200    | McF_6 | 0   | unif   | wholeT_0.5  | OT, OT-A       |
| 667 | No          | 9       | 9-B  | 200    | McF_6 | Inf | last   | singleC     | OT-A           |
| 668 | No          | 9       | 9-B  | 200    | McF_6 | Inf | last   | wholeT_0.01 | OT-A           |
| 669 | No          | 9       | 9-B  | 200    | McF_6 | Inf | last   | wholeT_0.5  | OT-A           |
| 670 | No          | 9       | 9-B  | 200    | McF_6 | Inf | unif   | singleC     | OT, OT-A       |
| 671 | No          | 9       | 9-B  | 200    | McF_6 | Inf | unif   | wholeT_0.01 | OT, OT-A       |
| 672 | No          | 9       | 9-B  | 200    | McF_6 | Inf | unif   | wholeT_0.5  | OT, OT-A       |
| 673 | No          | 9       | 9-B  | 100    | Bozic | 0   | last   | singleC     | OT, OT-A       |
| 674 | No          | 9       | 9-B  | 100    | Bozic | 0   | last   | wholeT_0.01 | OT, OT-A       |
| 675 | No          | 9       | 9-B  | 100    | Bozic | 0   | last   | wholeT_0.5  | OT, OT-A       |
| 676 | No          | 9       | 9-B  | 100    | Bozic | 0   | unif   | singleC     | OT, OT-A       |
| 677 | No          | 9       | 9-B  | 100    | Bozic | 0   | unif   | wholeT_0.01 | OT, OT-A       |

Table 9: (continued)

|     | Conjunction | Drivers | Tree | S.Size | Model | sh  | S.Time | S.Type      | Best method(s) |
|-----|-------------|---------|------|--------|-------|-----|--------|-------------|----------------|
| 678 | No          | 9       | 9-B  | 100    | Bozic | 0   | unif   | wholeT_0.5  | OT, OT-A       |
| 679 | No          | 9       | 9-B  | 100    | Bozic | Inf | last   | singleC     | OT, OT-A       |
| 680 | No          | 9       | 9-B  | 100    | Bozic | Inf | last   | wholeT_0.01 | OT, OT-A       |
| 681 | No          | 9       | 9-B  | 100    | Bozic | Inf | last   | wholeT_0.5  | OT, OT-A       |
| 682 | No          | 9       | 9-B  | 100    | Bozic | Inf | unif   | singleC     | OT, OT-A       |
| 683 | No          | 9       | 9-B  | 100    | Bozic | Inf | unif   | wholeT_0.01 | OT, OT-A       |
| 684 | No          | 9       | 9-B  | 100    | Bozic | Inf | unif   | wholeT_0.5  | OT, OT-A       |
| 685 | No          | 9       | 9-B  | 100    | exp   | 0   | last   | singleC     | OT, OT-A       |
| 686 | No          | 9       | 9-B  | 100    | exp   | 0   | last   | wholeT_0.01 | OT, OT-A       |
| 687 | No          | 9       | 9-B  | 100    | exp   | 0   | last   | wholeT_0.5  | OT, OT-A       |
| 688 | No          | 9       | 9-B  | 100    | exp   | 0   | unif   | singleC     | OT, OT-A       |
| 689 | No          | 9       | 9-B  | 100    | exp   | 0   | unif   | wholeT_0.01 | OT, OT-A       |
| 690 | No          | 9       | 9-B  | 100    | exp   | 0   | unif   | wholeT_0.5  | OT, OT-A       |
| 691 | No          | 9       | 9-B  | 100    | exp   | Inf | last   | singleC     | OT, OT-A       |
| 692 | No          | 9       | 9-B  | 100    | exp   | Inf | last   | wholeT_0.01 | OT, OT-A       |
| 693 | No          | 9       | 9-B  | 100    | exp   | Inf | last   | wholeT_0.5  | OT, OT-A       |
| 694 | No          | 9       | 9-B  | 100    | exp   | Inf | unif   | singleC     | OT, OT-A       |
| 695 | No          | 9       | 9-B  | 100    | exp   | Inf | unif   | wholeT_0.01 | OT, OT-A       |
| 696 | No          | 9       | 9-B  | 100    | exp   | Inf | unif   | wholeT_0.5  | OT, OT-A       |
| 697 | No          | 9       | 9-B  | 100    | McF_4 | 0   | last   | singleC     | OT, OT-A       |
| 698 | No          | 9       | 9-B  | 100    | McF_4 | 0   | last   | wholeT_0.01 | OT, OT-A       |
| 699 | No          | 9       | 9-B  | 100    | McF_4 | 0   | last   | wholeT_0.5  | OT, OT-A       |
| 700 | No          | 9       | 9-B  | 100    | McF_4 | 0   | unif   | singleC     | OT, OT-A       |
| 701 | No          | 9       | 9-B  | 100    | McF_4 | 0   | unif   | wholeT_0.01 | OT, OT-A       |
| 702 | No          | 9       | 9-B  | 100    | McF_4 | 0   | unif   | wholeT_0.5  | OT, OT-A       |
| 703 | No          | 9       | 9-B  | 100    | McF_4 | Inf | last   | singleC     | OT, OT-A       |
| 704 | No          | 9       | 9-B  | 100    | McF_4 | Inf | last   | wholeT_0.01 | OT             |
| 705 | No          | 9       | 9-B  | 100    | McF_4 | Inf | last   | wholeT_0.5  | OT, OT-A       |
| 706 | No          | 9       | 9-B  | 100    | McF_4 | Inf | unif   | singleC     | OT, OT-A       |
| 707 | No          | 9       | 9-B  | 100    | McF_4 | Inf | unif   | wholeT_0.01 | OT, OT-A       |
| 708 | No          | 9       | 9-B  | 100    | McF_4 | Inf | unif   | wholeT_0.5  | OT, OT-A       |
| 709 | No          | 9       | 9-B  | 100    | McF_6 | 0   | last   | singleC     | OT, OT-A       |
| 710 | No          | 9       | 9-B  | 100    | McF_6 | 0   | last   | wholeT_0.01 | OT, OT-A       |
| 711 | No          | 9       | 9-B  | 100    | McF_6 | 0   | last   | wholeT_0.5  | OT, OT-A       |
| 712 | No          | 9       | 9-B  | 100    | McF_6 | 0   | unif   | singleC     | OT, OT-A       |
| 713 | No          | 9       | 9-B  | 100    | McF_6 | 0   | unif   | wholeT_0.01 | OT, OT-A       |
| 714 | No          | 9       | 9-B  | 100    | McF_6 | 0   | unif   | wholeT_0.5  | OT, OT-A       |
| 715 | No          | 9       | 9-B  | 100    | McF_6 | Inf | last   | singleC     | OT-A           |
| 716 | No          | 9       | 9-B  | 100    | McF_6 | Inf | last   | wholeT_0.01 | OT-A           |
| 717 | No          | 9       | 9-B  | 100    | McF_6 | Inf | last   | wholeT_0.5  | OT-A           |

Table 9: (continued)

|     | Conjunction | Drivers | Tree | S.Size | Model | sh  | S.Time | S.Type      | Best method(s)       |
|-----|-------------|---------|------|--------|-------|-----|--------|-------------|----------------------|
| 718 | No          | 9       | 9-B  | 100    | McF_6 | Inf | unif   | singleC     | OT, OT-A             |
| 719 | No          | 9       | 9-B  | 100    | McF_6 | Inf | unif   | wholeT_0.01 | OT, OT-A             |
| 720 | No          | 9       | 9-B  | 100    | McF_6 | Inf | unif   | wholeT_0.5  | OT, OT-A             |
| 721 | No          | 7       | 7-B  | 1000   | Bozic | 0   | last   | singleC     | OT-A                 |
| 722 | No          | 7       | 7-B  | 1000   | Bozic | 0   | last   | wholeT_0.01 | OT-A                 |
| 723 | No          | 7       | 7-B  | 1000   | Bozic | 0   | last   | wholeT_0.5  | OT-A                 |
| 724 | No          | 7       | 7-B  | 1000   | Bozic | 0   | unif   | singleC     | OT, OT-A             |
| 725 | No          | 7       | 7-B  | 1000   | Bozic | 0   | unif   | wholeT_0.01 | CBN-A, OT, OT-A      |
| 726 | No          | 7       | 7-B  | 1000   | Bozic | 0   | unif   | wholeT_0.5  | OT                   |
| 727 | No          | 7       | 7-B  | 1000   | Bozic | Inf | last   | singleC     | DiP-A, OT-A          |
| 728 | No          | 7       | 7-B  | 1000   | Bozic | Inf | last   | wholeT_0.01 | DiP-A, OT-A          |
| 729 | No          | 7       | 7-B  | 1000   | Bozic | Inf | last   | wholeT_0.5  | DiP-A, OT-A          |
| 730 | No          | 7       | 7-B  | 1000   | Bozic | Inf | unif   | singleC     | CBN, CBN-A, OT, OT-A |
| 731 | No          | 7       | 7-B  | 1000   | Bozic | Inf | unif   | wholeT_0.01 | OT, OT-A             |
| 732 | No          | 7       | 7-B  | 1000   | Bozic | Inf | unif   | wholeT_0.5  | CBN, CBN-A           |
| 733 | No          | 7       | 7-B  | 1000   | exp   | 0   | last   | singleC     | OT-A                 |
| 734 | No          | 7       | 7-B  | 1000   | exp   | 0   | last   | wholeT_0.01 | OT-A                 |
| 735 | No          | 7       | 7-B  | 1000   | exp   | 0   | last   | wholeT_0.5  | OT-A                 |
| 736 | No          | 7       | 7-B  | 1000   | exp   | 0   | unif   | singleC     | OT, OT-A             |
| 737 | No          | 7       | 7-B  | 1000   | exp   | 0   | unif   | wholeT_0.01 | CBN, CBN-A, OT, OT-A |
| 738 | No          | 7       | 7-B  | 1000   | exp   | 0   | unif   | wholeT_0.5  | OT, OT-A             |
| 739 | No          | 7       | 7-B  | 1000   | exp   | Inf | last   | singleC     | OT-A                 |
| 740 | No          | 7       | 7-B  | 1000   | exp   | Inf | last   | wholeT_0.01 | OT-A                 |
| 741 | No          | 7       | 7-B  | 1000   | exp   | Inf | last   | wholeT_0.5  | OT-A                 |
| 742 | No          | 7       | 7-B  | 1000   | exp   | Inf | unif   | singleC     | CBN, OT, OT-A        |
| 743 | No          | 7       | 7-B  | 1000   | exp   | Inf | unif   | wholeT_0.01 | OT, OT-A             |
| 744 | No          | 7       | 7-B  | 1000   | exp   | Inf | unif   | wholeT_0.5  | OT, OT-A             |
| 745 | No          | 7       | 7-B  | 1000   | McF_4 | 0   | last   | singleC     | DiP-A, OT-A          |
| 746 | No          | 7       | 7-B  | 1000   | McF_4 | 0   | last   | wholeT_0.01 | DiP-A, OT-A          |
| 747 | No          | 7       | 7-B  | 1000   | McF_4 | 0   | last   | wholeT_0.5  | DiP-A, OT-A          |
| 748 | No          | 7       | 7-B  | 1000   | McF_4 | 0   | unif   | singleC     | DiP-A, OT, OT-A      |
| 749 | No          | 7       | 7-B  | 1000   | McF_4 | 0   | unif   | wholeT_0.01 | OT, OT-A             |
| 750 | No          | 7       | 7-B  | 1000   | McF_4 | 0   | unif   | wholeT_0.5  | DiP-A, OT, OT-A      |
| 751 | No          | 7       | 7-B  | 1000   | McF_4 | Inf | last   | singleC     | DiP-A, OT-A          |
| 752 | No          | 7       | 7-B  | 1000   | McF_4 | Inf | last   | wholeT_0.01 | DiP-A, OT-A          |
| 753 | No          | 7       | 7-B  | 1000   | McF_4 | Inf | last   | wholeT_0.5  | DiP-A, OT-A          |
| 754 | No          | 7       | 7-B  | 1000   | McF_4 | Inf | unif   | singleC     | OT, OT-A             |
| 755 | No          | 7       | 7-B  | 1000   | McF_4 | Inf | unif   | wholeT_0.01 | OT, OT-A             |
| 756 | No          | 7       | 7-B  | 1000   | McF_4 | Inf | unif   | wholeT_0.5  | OT, OT-A             |
| 757 | No          | 7       | 7-B  | 1000   | McF_6 | 0   | last   | singleC     | DiP-A, OT-A          |

Table 9: (continued)

|     | Conjunction | Drivers | Tree | S.Size | Model | sh  | S.Time | S.Type      | Best method(s)       |
|-----|-------------|---------|------|--------|-------|-----|--------|-------------|----------------------|
| 758 | No          | 7       | 7-B  | 1000   | McF_6 | 0   | last   | wholeT_0.01 | DiP-A, OT-A          |
| 759 | No          | 7       | 7-B  | 1000   | McF_6 | 0   | last   | wholeT_0.5  | DiP-A, OT-A          |
| 760 | No          | 7       | 7-B  | 1000   | McF_6 | 0   | unif   | singleC     | DiP, DiP-A, OT, OT-A |
| 761 | No          | 7       | 7-B  | 1000   | McF_6 | 0   | unif   | wholeT_0.01 | DiP, DiP-A, OT, OT-A |
| 762 | No          | 7       | 7-B  | 1000   | McF_6 | 0   | unif   | wholeT_0.5  | DiP, DiP-A, OT, OT-A |
| 763 | No          | 7       | 7-B  | 1000   | McF_6 | Inf | last   | singleC     | DiP-A, OT-A          |
| 764 | No          | 7       | 7-B  | 1000   | McF_6 | Inf | last   | wholeT_0.01 | DiP-A, OT-A          |
| 765 | No          | 7       | 7-B  | 1000   | McF_6 | Inf | last   | wholeT_0.5  | DiP-A, OT-A          |
| 766 | No          | 7       | 7-B  | 1000   | McF_6 | Inf | unif   | singleC     | DiP-A, OT, OT-A      |
| 767 | No          | 7       | 7-B  | 1000   | McF_6 | Inf | unif   | wholeT_0.01 | DiP-A, OT, OT-A      |
| 768 | No          | 7       | 7-B  | 1000   | McF_6 | Inf | unif   | wholeT_0.5  | DiP-A, OT, OT-A      |
| 769 | No          | 7       | 7-B  | 200    | Bozic | 0   | last   | singleC     | OT-A                 |
| 770 | No          | 7       | 7-B  | 200    | Bozic | 0   | last   | wholeT_0.01 | OT-A                 |
| 771 | No          | 7       | 7-B  | 200    | Bozic | 0   | last   | wholeT_0.5  | OT-A                 |
| 772 | No          | 7       | 7-B  | 200    | Bozic | 0   | unif   | singleC     | OT, OT-A             |
| 773 | No          | 7       | 7-B  | 200    | Bozic | 0   | unif   | wholeT_0.01 | CBN, CBN-A, OT, OT-A |
| 774 | No          | 7       | 7-B  | 200    | Bozic | 0   | unif   | wholeT_0.5  | OT, OT-A             |
| 775 | No          | 7       | 7-B  | 200    | Bozic | Inf | last   | singleC     | OT-A                 |
| 776 | No          | 7       | 7-B  | 200    | Bozic | Inf | last   | wholeT_0.01 | OT-A                 |
| 777 | No          | 7       | 7-B  | 200    | Bozic | Inf | last   | wholeT_0.5  | OT-A                 |
| 778 | No          | 7       | 7-B  | 200    | Bozic | Inf | unif   | singleC     | CBN, CBN-A, OT, OT-A |
| 779 | No          | 7       | 7-B  | 200    | Bozic | Inf | unif   | wholeT_0.01 | OT, OT-A             |
| 780 | No          | 7       | 7-B  | 200    | Bozic | Inf | unif   | wholeT_0.5  | CBN, CBN-A, OT, OT-A |
| 781 | No          | 7       | 7-B  | 200    | exp   | 0   | last   | singleC     | OT-A                 |
| 782 | No          | 7       | 7-B  | 200    | exp   | 0   | last   | wholeT_0.01 | OT-A                 |
| 783 | No          | 7       | 7-B  | 200    | exp   | 0   | last   | wholeT_0.5  | OT-A                 |
| 784 | No          | 7       | 7-B  | 200    | exp   | 0   | unif   | singleC     | OT, OT-A             |
| 785 | No          | 7       | 7-B  | 200    | exp   | 0   | unif   | wholeT_0.01 | OT, OT-A             |
| 786 | No          | 7       | 7-B  | 200    | exp   | 0   | unif   | wholeT_0.5  | OT, OT-A             |
| 787 | No          | 7       | 7-B  | 200    | exp   | Inf | last   | singleC     | OT-A                 |
| 788 | No          | 7       | 7-B  | 200    | exp   | Inf | last   | wholeT_0.01 | OT-A                 |
| 789 | No          | 7       | 7-B  | 200    | exp   | Inf | last   | wholeT_0.5  | OT-A                 |
| 790 | No          | 7       | 7-B  | 200    | exp   | Inf | unif   | singleC     | CBN, CBN-A, OT, OT-A |
| 791 | No          | 7       | 7-B  | 200    | exp   | Inf | unif   | wholeT_0.01 | OT, OT-A             |
| 792 | No          | 7       | 7-B  | 200    | exp   | Inf | unif   | wholeT_0.5  | OT, OT-A             |
| 793 | No          | 7       | 7-B  | 200    | McF_4 | 0   | last   | singleC     | OT-A                 |
| 794 | No          | 7       | 7-B  | 200    | McF_4 | 0   | last   | wholeT_0.01 | OT-A                 |
| 795 | No          | 7       | 7-B  | 200    | McF_4 | 0   | last   | wholeT_0.5  | OT-A                 |
| 796 | No          | 7       | 7-B  | 200    | McF_4 | 0   | unif   | singleC     | OT, OT-A             |
| 797 | No          | 7       | 7-B  | 200    | McF_4 | 0   | unif   | wholeT_0.01 | OT-A                 |



Table 9: (continued)

|     | Conjunction | Drivers | Tree | S.Size | Model | sh  | S.Time | S.Type      | Best method(s)       |
|-----|-------------|---------|------|--------|-------|-----|--------|-------------|----------------------|
| 798 | No          | 7       | 7-B  | 200    | McF_4 | 0   | unif   | wholeT_0.5  | OT, OT-A             |
| 799 | No          | 7       | 7-B  | 200    | McF_4 | Inf | last   | singleC     | OT-A                 |
| 800 | No          | 7       | 7-B  | 200    | McF_4 | Inf | last   | wholeT_0.01 | OT-A                 |
| 801 | No          | 7       | 7-B  | 200    | McF_4 | Inf | last   | wholeT_0.5  | OT-A                 |
| 802 | No          | 7       | 7-B  | 200    | McF_4 | Inf | unif   | singleC     | OT, OT-A             |
| 803 | No          | 7       | 7-B  | 200    | McF_4 | Inf | unif   | wholeT_0.01 | OT, OT-A             |
| 804 | No          | 7       | 7-B  | 200    | McF_4 | Inf | unif   | wholeT_0.5  | OT, OT-A             |
| 805 | No          | 7       | 7-B  | 200    | McF_6 | 0   | last   | singleC     | OT-A                 |
| 806 | No          | 7       | 7-B  | 200    | McF_6 | 0   | last   | wholeT_0.01 | DiP-A, OT-A          |
| 807 | No          | 7       | 7-B  | 200    | McF_6 | 0   | last   | wholeT_0.5  | OT-A                 |
| 808 | No          | 7       | 7-B  | 200    | McF_6 | 0   | unif   | singleC     | CBN-A, OT, OT-A      |
| 809 | No          | 7       | 7-B  | 200    | McF_6 | 0   | unif   | wholeT_0.01 | OT, OT-A             |
| 810 | No          | 7       | 7-B  | 200    | McF_6 | 0   | unif   | wholeT_0.5  | CBN-A, OT, OT-A      |
| 811 | No          | 7       | 7-B  | 200    | McF_6 | Inf | last   | singleC     | OT-A                 |
| 812 | No          | 7       | 7-B  | 200    | McF_6 | Inf | last   | wholeT_0.01 | OT-A                 |
| 813 | No          | 7       | 7-B  | 200    | McF_6 | Inf | last   | wholeT_0.5  | OT-A                 |
| 814 | No          | 7       | 7-B  | 200    | McF_6 | Inf | unif   | singleC     | OT, OT-A             |
| 815 | No          | 7       | 7-B  | 200    | McF_6 | Inf | unif   | wholeT_0.01 | CBN-A, OT, OT-A      |
| 816 | No          | 7       | 7-B  | 200    | McF_6 | Inf | unif   | wholeT_0.5  | CBN-A, OT, OT-A      |
| 817 | No          | 7       | 7-B  | 100    | Bozic | 0   | last   | singleC     | OT-A                 |
| 818 | No          | 7       | 7-B  | 100    | Bozic | 0   | last   | wholeT_0.01 | OT-A                 |
| 819 | No          | 7       | 7-B  | 100    | Bozic | 0   | last   | wholeT_0.5  | OT-A                 |
| 820 | No          | 7       | 7-B  | 100    | Bozic | 0   | unif   | singleC     | OT, OT-A             |
| 821 | No          | 7       | 7-B  | 100    | Bozic | 0   | unif   | wholeT_0.01 | CBN, CBN-A, OT, OT-A |
| 822 | No          | 7       | 7-B  | 100    | Bozic | 0   | unif   | wholeT_0.5  | OT, OT-A             |
| 823 | No          | 7       | 7-B  | 100    | Bozic | Inf | last   | singleC     | OT-A                 |
| 824 | No          | 7       | 7-B  | 100    | Bozic | Inf | last   | wholeT_0.01 | OT-A                 |
| 825 | No          | 7       | 7-B  | 100    | Bozic | Inf | last   | wholeT_0.5  | OT-A                 |
| 826 | No          | 7       | 7-B  | 100    | Bozic | Inf | unif   | singleC     | CBN, OT, OT-A        |
| 827 | No          | 7       | 7-B  | 100    | Bozic | Inf | unif   | wholeT_0.01 | OT, OT-A             |
| 828 | No          | 7       | 7-B  | 100    | Bozic | Inf | unif   | wholeT_0.5  | CBN-A, OT, OT-A      |
| 829 | No          | 7       | 7-B  | 100    | exp   | 0   | last   | singleC     | OT-A                 |
| 830 | No          | 7       | 7-B  | 100    | exp   | 0   | last   | wholeT_0.01 | OT-A                 |
| 831 | No          | 7       | 7-B  | 100    | exp   | 0   | last   | wholeT_0.5  | OT-A                 |
| 832 | No          | 7       | 7-B  | 100    | exp   | 0   | unif   | singleC     | OT, OT-A             |
| 833 | No          | 7       | 7-B  | 100    | exp   | 0   | unif   | wholeT_0.01 | OT, OT-A             |
| 834 | No          | 7       | 7-B  | 100    | exp   | 0   | unif   | wholeT_0.5  | OT, OT-A             |
| 835 | No          | 7       | 7-B  | 100    | exp   | Inf | last   | singleC     | OT-A                 |
| 836 | No          | 7       | 7-B  | 100    | exp   | Inf | last   | wholeT_0.01 | OT-A                 |
| 837 | No          | 7       | 7-B  | 100    | exp   | Inf | last   | wholeT_0.5  | OT-A                 |

Table 9: (continued)

|     | Conjunction | Drivers | Tree | S.Size | Model | sh  | S.Time | S.Type      | Best method(s)  |
|-----|-------------|---------|------|--------|-------|-----|--------|-------------|-----------------|
| 838 | No          | 7       | 7-B  | 100    | exp   | Inf | unif   | singleC     | OT, OT-A        |
| 839 | No          | 7       | 7-B  | 100    | exp   | Inf | unif   | wholeT_0.01 | CBN, OT, OT-A   |
| 840 | No          | 7       | 7-B  | 100    | exp   | Inf | unif   | wholeT_0.5  | OT-A            |
| 841 | No          | 7       | 7-B  | 100    | McF_4 | 0   | last   | singleC     | OT-A            |
| 842 | No          | 7       | 7-B  | 100    | McF_4 | 0   | last   | wholeT_0.01 | OT-A            |
| 843 | No          | 7       | 7-B  | 100    | McF_4 | 0   | last   | wholeT_0.5  | OT-A            |
| 844 | No          | 7       | 7-B  | 100    | McF_4 | 0   | unif   | singleC     | OT, OT-A        |
| 845 | No          | 7       | 7-B  | 100    | McF_4 | 0   | unif   | wholeT_0.01 | OT, OT-A        |
| 846 | No          | 7       | 7-B  | 100    | McF_4 | 0   | unif   | wholeT_0.5  | OT, OT-A        |
| 847 | No          | 7       | 7-B  | 100    | McF_4 | Inf | last   | singleC     | OT-A            |
| 848 | No          | 7       | 7-B  | 100    | McF_4 | Inf | last   | wholeT_0.01 | OT-A            |
| 849 | No          | 7       | 7-B  | 100    | McF_4 | Inf | last   | wholeT_0.5  | OT-A            |
| 850 | No          | 7       | 7-B  | 100    | McF_4 | Inf | unif   | singleC     | OT, OT-A        |
| 851 | No          | 7       | 7-B  | 100    | McF_4 | Inf | unif   | wholeT_0.01 | OT, OT-A        |
| 852 | No          | 7       | 7-B  | 100    | McF_4 | Inf | unif   | wholeT_0.5  | OT, OT-A        |
| 853 | No          | 7       | 7-B  | 100    | McF_6 | 0   | last   | singleC     | OT-A            |
| 854 | No          | 7       | 7-B  | 100    | McF_6 | 0   | last   | wholeT_0.01 | OT-A            |
| 855 | No          | 7       | 7-B  | 100    | McF_6 | 0   | last   | wholeT_0.5  | OT-A            |
| 856 | No          | 7       | 7-B  | 100    | McF_6 | 0   | unif   | singleC     | CBN-A, OT, OT-A |
| 857 | No          | 7       | 7-B  | 100    | McF_6 | 0   | unif   | wholeT_0.01 | CBN-A, OT, OT-A |
| 858 | No          | 7       | 7-B  | 100    | McF_6 | 0   | unif   | wholeT_0.5  | CBN-A, OT, OT-A |
| 859 | No          | 7       | 7-B  | 100    | McF_6 | Inf | last   | singleC     | OT-A            |
| 860 | No          | 7       | 7-B  | 100    | McF_6 | Inf | last   | wholeT_0.01 | OT-A            |
| 861 | No          | 7       | 7-B  | 100    | McF_6 | Inf | last   | wholeT_0.5  | OT-A            |
| 862 | No          | 7       | 7-B  | 100    | McF_6 | Inf | unif   | singleC     | CBN-A, OT, OT-A |
| 863 | No          | 7       | 7-B  | 100    | McF_6 | Inf | unif   | wholeT_0.01 | CBN-A, OT-A     |
| 864 | No          | 7       | 7-B  | 100    | McF_6 | Inf | unif   | wholeT_0.5  | CBN-A, OT, OT-A |

## 4.2 Confidence sets (MCB), PFD, Drivers Known

Table 10: Confidence sets (method MCB) when Drivers are Known for measure PFD.

|    | Conjunction | Drivers | Tree | S.Size | Model | sh  | S.Time | S.Type      | Best method(s)       |
|----|-------------|---------|------|--------|-------|-----|--------|-------------|----------------------|
| 1  | Yes         | 11      | 11-A | 1000   | Bozic | 0   | last   | singleC     | OT, OT-A             |
| 2  | Yes         | 11      | 11-A | 1000   | Bozic | 0   | last   | wholeT_0.01 | DiP, DiP-A           |
| 3  | Yes         | 11      | 11-A | 1000   | Bozic | 0   | last   | wholeT_0.5  | OT, OT-A             |
| 4  | Yes         | 11      | 11-A | 1000   | Bozic | 0   | unif   | singleC     | DiP, DiP-A           |
| 5  | Yes         | 11      | 11-A | 1000   | Bozic | 0   | unif   | wholeT_0.01 | DiP, DiP-A, OT, OT-A |
| 6  | Yes         | 11      | 11-A | 1000   | Bozic | 0   | unif   | wholeT_0.5  | OT, OT-A             |
| 7  | Yes         | 11      | 11-A | 1000   | Bozic | Inf | last   | singleC     | OT, OT-A             |
| 8  | Yes         | 11      | 11-A | 1000   | Bozic | Inf | last   | wholeT_0.01 | DiP, DiP-A           |
| 9  | Yes         | 11      | 11-A | 1000   | Bozic | Inf | last   | wholeT_0.5  | OT                   |
| 10 | Yes         | 11      | 11-A | 1000   | Bozic | Inf | unif   | singleC     | OT, OT-A             |
| 11 | Yes         | 11      | 11-A | 1000   | Bozic | Inf | unif   | wholeT_0.01 | OT, OT-A             |
| 12 | Yes         | 11      | 11-A | 1000   | Bozic | Inf | unif   | wholeT_0.5  | OT, OT-A             |
| 13 | Yes         | 11      | 11-A | 1000   | exp   | 0   | last   | singleC     | OT, OT-A             |
| 14 | Yes         | 11      | 11-A | 1000   | exp   | 0   | last   | wholeT_0.01 | DiP-A, OT, OT-A      |
| 15 | Yes         | 11      | 11-A | 1000   | exp   | 0   | last   | wholeT_0.5  | OT, OT-A             |
| 16 | Yes         | 11      | 11-A | 1000   | exp   | 0   | unif   | singleC     | OT, OT-A             |
| 17 | Yes         | 11      | 11-A | 1000   | exp   | 0   | unif   | wholeT_0.01 | DiP-A                |
| 18 | Yes         | 11      | 11-A | 1000   | exp   | 0   | unif   | wholeT_0.5  | OT, OT-A             |
| 19 | Yes         | 11      | 11-A | 1000   | exp   | Inf | last   | singleC     | OT, OT-A             |
| 20 | Yes         | 11      | 11-A | 1000   | exp   | Inf | last   | wholeT_0.01 | OT, OT-A             |
| 21 | Yes         | 11      | 11-A | 1000   | exp   | Inf | last   | wholeT_0.5  | OT, OT-A             |
| 22 | Yes         | 11      | 11-A | 1000   | exp   | Inf | unif   | singleC     | OT, OT-A             |
| 23 | Yes         | 11      | 11-A | 1000   | exp   | Inf | unif   | wholeT_0.01 | OT, OT-A             |
| 24 | Yes         | 11      | 11-A | 1000   | exp   | Inf | unif   | wholeT_0.5  | OT, OT-A             |
| 25 | Yes         | 11      | 11-A | 1000   | McF_4 | 0   | last   | singleC     | DiP-A, OT, OT-A      |
| 26 | Yes         | 11      | 11-A | 1000   | McF_4 | 0   | last   | wholeT_0.01 | OT, OT-A             |
| 27 | Yes         | 11      | 11-A | 1000   | McF_4 | 0   | last   | wholeT_0.5  | DiP-A, OT, OT-A      |
| 28 | Yes         | 11      | 11-A | 1000   | McF_4 | 0   | unif   | singleC     | DiP, DiP-A, OT, OT-A |
| 29 | Yes         | 11      | 11-A | 1000   | McF_4 | 0   | unif   | wholeT_0.01 | DiP, DiP-A           |
| 30 | Yes         | 11      | 11-A | 1000   | McF_4 | 0   | unif   | wholeT_0.5  | DiP, DiP-A           |
| 31 | Yes         | 11      | 11-A | 1000   | McF_4 | Inf | last   | singleC     | OT, OT-A             |
| 32 | Yes         | 11      | 11-A | 1000   | McF_4 | Inf | last   | wholeT_0.01 | OT, OT-A             |
| 33 | Yes         | 11      | 11-A | 1000   | McF_4 | Inf | last   | wholeT_0.5  | DiP-A, OT, OT-A      |
| 34 | Yes         | 11      | 11-A | 1000   | McF_4 | Inf | unif   | singleC     | DiP, DiP-A, OT, OT-A |
| 35 | Yes         | 11      | 11-A | 1000   | McF_4 | Inf | unif   | wholeT_0.01 | OT, OT-A             |
| 36 | Yes         | 11      | 11-A | 1000   | McF_4 | Inf | unif   | wholeT_0.5  | DiP, DiP-A, OT, OT-A |
| 37 | Yes         | 11      | 11-A | 1000   | McF_6 | 0   | last   | singleC     | DiP, OT              |

Table 10: (continued)

|    | Conjunction | Drivers | Tree | S.Size | Model | sh  | S.Time | S.Type      | Best method(s)       |
|----|-------------|---------|------|--------|-------|-----|--------|-------------|----------------------|
| 38 | Yes         | 11      | 11-A | 1000   | McF_6 | 0   | last   | wholeT_0.01 | DiP, OT              |
| 39 | Yes         | 11      | 11-A | 1000   | McF_6 | 0   | last   | wholeT_0.5  | DiP, OT              |
| 40 | Yes         | 11      | 11-A | 1000   | McF_6 | 0   | unif   | singleC     | DiP, DiP-A, OT, OT-A |
| 41 | Yes         | 11      | 11-A | 1000   | McF_6 | 0   | unif   | wholeT_0.01 | DiP, DiP-A, OT, OT-A |
| 42 | Yes         | 11      | 11-A | 1000   | McF_6 | 0   | unif   | wholeT_0.5  | DiP, DiP-A           |
| 43 | Yes         | 11      | 11-A | 1000   | McF_6 | Inf | last   | singleC     | DiP, OT              |
| 44 | Yes         | 11      | 11-A | 1000   | McF_6 | Inf | last   | wholeT_0.01 | DiP, OT              |
| 45 | Yes         | 11      | 11-A | 1000   | McF_6 | Inf | last   | wholeT_0.5  | DiP, OT              |
| 46 | Yes         | 11      | 11-A | 1000   | McF_6 | Inf | unif   | singleC     | DiP, DiP-A           |
| 47 | Yes         | 11      | 11-A | 1000   | McF_6 | Inf | unif   | wholeT_0.01 | DiP, DiP-A           |
| 48 | Yes         | 11      | 11-A | 1000   | McF_6 | Inf | unif   | wholeT_0.5  | DiP, DiP-A           |
| 49 | Yes         | 11      | 11-A | 200    | Bozic | 0   | last   | singleC     | OT, OT-A             |
| 50 | Yes         | 11      | 11-A | 200    | Bozic | 0   | last   | wholeT_0.01 | OT, OT-A             |
| 51 | Yes         | 11      | 11-A | 200    | Bozic | 0   | last   | wholeT_0.5  | OT, OT-A             |
| 52 | Yes         | 11      | 11-A | 200    | Bozic | 0   | unif   | singleC     | OT, OT-A             |
| 53 | Yes         | 11      | 11-A | 200    | Bozic | 0   | unif   | wholeT_0.01 | DiP, DiP-A, OT, OT-A |
| 54 | Yes         | 11      | 11-A | 200    | Bozic | 0   | unif   | wholeT_0.5  | OT, OT-A             |
| 55 | Yes         | 11      | 11-A | 200    | Bozic | Inf | last   | singleC     | OT, OT-A             |
| 56 | Yes         | 11      | 11-A | 200    | Bozic | Inf | last   | wholeT_0.01 | OT, OT-A             |
| 57 | Yes         | 11      | 11-A | 200    | Bozic | Inf | last   | wholeT_0.5  | OT, OT-A             |
| 58 | Yes         | 11      | 11-A | 200    | Bozic | Inf | unif   | singleC     | OT, OT-A             |
| 59 | Yes         | 11      | 11-A | 200    | Bozic | Inf | unif   | wholeT_0.01 | OT, OT-A             |
| 60 | Yes         | 11      | 11-A | 200    | Bozic | Inf | unif   | wholeT_0.5  | OT, OT-A             |
| 61 | Yes         | 11      | 11-A | 200    | exp   | 0   | last   | singleC     | OT, OT-A             |
| 62 | Yes         | 11      | 11-A | 200    | exp   | 0   | last   | wholeT_0.01 | OT, OT-A             |
| 63 | Yes         | 11      | 11-A | 200    | exp   | 0   | last   | wholeT_0.5  | OT, OT-A             |
| 64 | Yes         | 11      | 11-A | 200    | exp   | 0   | unif   | singleC     | OT, OT-A             |
| 65 | Yes         | 11      | 11-A | 200    | exp   | 0   | unif   | wholeT_0.01 | OT, OT-A             |
| 66 | Yes         | 11      | 11-A | 200    | exp   | 0   | unif   | wholeT_0.5  | CBN, CBN-A           |
| 67 | Yes         | 11      | 11-A | 200    | exp   | Inf | last   | singleC     | OT, OT-A             |
| 68 | Yes         | 11      | 11-A | 200    | exp   | Inf | last   | wholeT_0.01 | OT, OT-A             |
| 69 | Yes         | 11      | 11-A | 200    | exp   | Inf | last   | wholeT_0.5  | OT, OT-A             |
| 70 | Yes         | 11      | 11-A | 200    | exp   | Inf | unif   | singleC     | OT, OT-A             |
| 71 | Yes         | 11      | 11-A | 200    | exp   | Inf | unif   | wholeT_0.01 | OT, OT-A             |
| 72 | Yes         | 11      | 11-A | 200    | exp   | Inf | unif   | wholeT_0.5  | OT, OT-A             |
| 73 | Yes         | 11      | 11-A | 200    | McF_4 | 0   | last   | singleC     | OT, OT-A             |
| 74 | Yes         | 11      | 11-A | 200    | McF_4 | 0   | last   | wholeT_0.01 | DiP-A, OT, OT-A      |
| 75 | Yes         | 11      | 11-A | 200    | McF_4 | 0   | last   | wholeT_0.5  | DiP-A, OT, OT-A      |
| 76 | Yes         | 11      | 11-A | 200    | McF_4 | 0   | unif   | singleC     | OT, OT-A             |
| 77 | Yes         | 11      | 11-A | 200    | McF_4 | 0   | unif   | wholeT_0.01 | DiP, DiP-A, OT, OT-A |

Table 10: (continued)

|     | Conjunction | Drivers | Tree | S.Size | Model | sh  | S.Time | S.Type      | Best method(s)       |
|-----|-------------|---------|------|--------|-------|-----|--------|-------------|----------------------|
| 78  | Yes         | 11      | 11-A | 200    | McF_4 | 0   | unif   | wholeT_0.5  | OT, OT-A             |
| 79  | Yes         | 11      | 11-A | 200    | McF_4 | Inf | last   | singleC     | OT, OT-A             |
| 80  | Yes         | 11      | 11-A | 200    | McF_4 | Inf | last   | wholeT_0.01 | OT, OT-A             |
| 81  | Yes         | 11      | 11-A | 200    | McF_4 | Inf | last   | wholeT_0.5  | OT, OT-A             |
| 82  | Yes         | 11      | 11-A | 200    | McF_4 | Inf | unif   | singleC     | OT, OT-A             |
| 83  | Yes         | 11      | 11-A | 200    | McF_4 | Inf | unif   | wholeT_0.01 | OT, OT-A             |
| 84  | Yes         | 11      | 11-A | 200    | McF_4 | Inf | unif   | wholeT_0.5  | OT, OT-A             |
| 85  | Yes         | 11      | 11-A | 200    | McF_6 | 0   | last   | singleC     | DiP, OT              |
| 86  | Yes         | 11      | 11-A | 200    | McF_6 | 0   | last   | wholeT_0.01 | DiP, OT              |
| 87  | Yes         | 11      | 11-A | 200    | McF_6 | 0   | last   | wholeT_0.5  | DiP, OT              |
| 88  | Yes         | 11      | 11-A | 200    | McF_6 | 0   | unif   | singleC     | OT, OT-A             |
| 89  | Yes         | 11      | 11-A | 200    | McF_6 | 0   | unif   | wholeT_0.01 | DiP, DiP-A, OT, OT-A |
| 90  | Yes         | 11      | 11-A | 200    | McF_6 | 0   | unif   | wholeT_0.5  | OT, OT-A             |
| 91  | Yes         | 11      | 11-A | 200    | McF_6 | Inf | last   | singleC     | OT                   |
| 92  | Yes         | 11      | 11-A | 200    | McF_6 | Inf | last   | wholeT_0.01 | OT                   |
| 93  | Yes         | 11      | 11-A | 200    | McF_6 | Inf | last   | wholeT_0.5  | OT                   |
| 94  | Yes         | 11      | 11-A | 200    | McF_6 | Inf | unif   | singleC     | CBN-A, OT, OT-A      |
| 95  | Yes         | 11      | 11-A | 200    | McF_6 | Inf | unif   | wholeT_0.01 | OT, OT-A             |
| 96  | Yes         | 11      | 11-A | 200    | McF_6 | Inf | unif   | wholeT_0.5  | OT, OT-A             |
| 97  | Yes         | 11      | 11-A | 100    | Bozic | 0   | last   | singleC     | OT, OT-A             |
| 98  | Yes         | 11      | 11-A | 100    | Bozic | 0   | last   | wholeT_0.01 | OT, OT-A             |
| 99  | Yes         | 11      | 11-A | 100    | Bozic | 0   | last   | wholeT_0.5  | OT, OT-A             |
| 100 | Yes         | 11      | 11-A | 100    | Bozic | 0   | unif   | singleC     | OT, OT-A             |
| 101 | Yes         | 11      | 11-A | 100    | Bozic | 0   | unif   | wholeT_0.01 | OT, OT-A             |
| 102 | Yes         | 11      | 11-A | 100    | Bozic | 0   | unif   | wholeT_0.5  | CBN, CBN-A           |
| 103 | Yes         | 11      | 11-A | 100    | Bozic | Inf | last   | singleC     | OT, OT-A             |
| 104 | Yes         | 11      | 11-A | 100    | Bozic | Inf | last   | wholeT_0.01 | OT, OT-A             |
| 105 | Yes         | 11      | 11-A | 100    | Bozic | Inf | last   | wholeT_0.5  | OT, OT-A             |
| 106 | Yes         | 11      | 11-A | 100    | Bozic | Inf | unif   | singleC     | OT, OT-A             |
| 107 | Yes         | 11      | 11-A | 100    | Bozic | Inf | unif   | wholeT_0.01 | OT, OT-A             |
| 108 | Yes         | 11      | 11-A | 100    | Bozic | Inf | unif   | wholeT_0.5  | OT, OT-A             |
| 109 | Yes         | 11      | 11-A | 100    | exp   | 0   | last   | singleC     | OT, OT-A             |
| 110 | Yes         | 11      | 11-A | 100    | exp   | 0   | last   | wholeT_0.01 | OT, OT-A             |
| 111 | Yes         | 11      | 11-A | 100    | exp   | 0   | last   | wholeT_0.5  | OT, OT-A             |
| 112 | Yes         | 11      | 11-A | 100    | exp   | 0   | unif   | singleC     | CBN, CBN-A           |
| 113 | Yes         | 11      | 11-A | 100    | exp   | 0   | unif   | wholeT_0.01 | OT, OT-A             |
| 114 | Yes         | 11      | 11-A | 100    | exp   | 0   | unif   | wholeT_0.5  | CBN, CBN-A           |
| 115 | Yes         | 11      | 11-A | 100    | exp   | Inf | last   | singleC     | OT, OT-A             |
| 116 | Yes         | 11      | 11-A | 100    | exp   | Inf | last   | wholeT_0.01 | OT, OT-A             |
| 117 | Yes         | 11      | 11-A | 100    | exp   | Inf | last   | wholeT_0.5  | OT, OT-A             |

Table 10: (continued)

|     | Conjunction | Drivers | Tree | S.Size | Model | sh  | S.Time | S.Type      | Best method(s)       |
|-----|-------------|---------|------|--------|-------|-----|--------|-------------|----------------------|
| 118 | Yes         | 11      | 11-A | 100    | exp   | Inf | unif   | singleC     | OT, OT-A             |
| 119 | Yes         | 11      | 11-A | 100    | exp   | Inf | unif   | wholeT_0.01 | OT, OT-A             |
| 120 | Yes         | 11      | 11-A | 100    | exp   | Inf | unif   | wholeT_0.5  | OT, OT-A             |
| 121 | Yes         | 11      | 11-A | 100    | McF_4 | 0   | last   | singleC     | OT, OT-A             |
| 122 | Yes         | 11      | 11-A | 100    | McF_4 | 0   | last   | wholeT_0.01 | DiP, DiP-A, OT, OT-A |
| 123 | Yes         | 11      | 11-A | 100    | McF_4 | 0   | last   | wholeT_0.5  | OT, OT-A             |
| 124 | Yes         | 11      | 11-A | 100    | McF_4 | 0   | unif   | singleC     | OT, OT-A             |
| 125 | Yes         | 11      | 11-A | 100    | McF_4 | 0   | unif   | wholeT_0.01 | DiP, DiP-A, OT, OT-A |
| 126 | Yes         | 11      | 11-A | 100    | McF_4 | 0   | unif   | wholeT_0.5  | OT, OT-A             |
| 127 | Yes         | 11      | 11-A | 100    | McF_4 | Inf | last   | singleC     | OT, OT-A             |
| 128 | Yes         | 11      | 11-A | 100    | McF_4 | Inf | last   | wholeT_0.01 | OT, OT-A             |
| 129 | Yes         | 11      | 11-A | 100    | McF_4 | Inf | last   | wholeT_0.5  | OT, OT-A             |
| 130 | Yes         | 11      | 11-A | 100    | McF_4 | Inf | unif   | singleC     | OT, OT-A             |
| 131 | Yes         | 11      | 11-A | 100    | McF_4 | Inf | unif   | wholeT_0.01 | OT, OT-A             |
| 132 | Yes         | 11      | 11-A | 100    | McF_4 | Inf | unif   | wholeT_0.5  | OT, OT-A             |
| 133 | Yes         | 11      | 11-A | 100    | McF_6 | 0   | last   | singleC     | DiP, OT              |
| 134 | Yes         | 11      | 11-A | 100    | McF_6 | 0   | last   | wholeT_0.01 | DiP, OT              |
| 135 | Yes         | 11      | 11-A | 100    | McF_6 | 0   | last   | wholeT_0.5  | OT                   |
| 136 | Yes         | 11      | 11-A | 100    | McF_6 | 0   | unif   | singleC     | OT, OT-A             |
| 137 | Yes         | 11      | 11-A | 100    | McF_6 | 0   | unif   | wholeT_0.01 | DiP, DiP-A, OT       |
| 138 | Yes         | 11      | 11-A | 100    | McF_6 | 0   | unif   | wholeT_0.5  | OT, OT-A             |
| 139 | Yes         | 11      | 11-A | 100    | McF_6 | Inf | last   | singleC     | OT                   |
| 140 | Yes         | 11      | 11-A | 100    | McF_6 | Inf | last   | wholeT_0.01 | OT                   |
| 141 | Yes         | 11      | 11-A | 100    | McF_6 | Inf | last   | wholeT_0.5  | OT                   |
| 142 | Yes         | 11      | 11-A | 100    | McF_6 | Inf | unif   | singleC     | OT, OT-A             |
| 143 | Yes         | 11      | 11-A | 100    | McF_6 | Inf | unif   | wholeT_0.01 | OT, OT-A             |
| 144 | Yes         | 11      | 11-A | 100    | McF_6 | Inf | unif   | wholeT_0.5  | OT, OT-A             |
| 145 | Yes         | 9       | 9-A  | 1000   | Bozic | 0   | last   | singleC     | OT, OT-A             |
| 146 | Yes         | 9       | 9-A  | 1000   | Bozic | 0   | last   | wholeT_0.01 | DiP, DiP-A           |
| 147 | Yes         | 9       | 9-A  | 1000   | Bozic | 0   | last   | wholeT_0.5  | OT, OT-A             |
| 148 | Yes         | 9       | 9-A  | 1000   | Bozic | 0   | unif   | singleC     | OT, OT-A             |
| 149 | Yes         | 9       | 9-A  | 1000   | Bozic | 0   | unif   | wholeT_0.01 | DiP, DiP-A, OT       |
| 150 | Yes         | 9       | 9-A  | 1000   | Bozic | 0   | unif   | wholeT_0.5  | OT, OT-A             |
| 151 | Yes         | 9       | 9-A  | 1000   | Bozic | Inf | last   | singleC     | OT, OT-A             |
| 152 | Yes         | 9       | 9-A  | 1000   | Bozic | Inf | last   | wholeT_0.01 | DiP, DiP-A, OT, OT-A |
| 153 | Yes         | 9       | 9-A  | 1000   | Bozic | Inf | last   | wholeT_0.5  | OT, OT-A             |
| 154 | Yes         | 9       | 9-A  | 1000   | Bozic | Inf | unif   | singleC     | DiP, DiP-A, OT       |
| 155 | Yes         | 9       | 9-A  | 1000   | Bozic | Inf | unif   | wholeT_0.01 | DiP, DiP-A, OT, OT-A |
| 156 | Yes         | 9       | 9-A  | 1000   | Bozic | Inf | unif   | wholeT_0.5  | DiP-A, OT, OT-A      |
| 157 | Yes         | 9       | 9-A  | 1000   | exp   | 0   | last   | singleC     | OT, OT-A             |

Table 10: (continued)

|     | Conjunction | Drivers | Tree | S.Size | Model | sh  | S.Time | S.Type      | Best method(s)            |
|-----|-------------|---------|------|--------|-------|-----|--------|-------------|---------------------------|
| 158 | Yes         | 9       | 9-A  | 1000   | exp   | 0   | last   | wholeT_0.01 | DiP-A, OT, OT-A           |
| 159 | Yes         | 9       | 9-A  | 1000   | exp   | 0   | last   | wholeT_0.5  | OT, OT-A                  |
| 160 | Yes         | 9       | 9-A  | 1000   | exp   | 0   | unif   | singleC     | OT, OT-A                  |
| 161 | Yes         | 9       | 9-A  | 1000   | exp   | 0   | unif   | wholeT_0.01 | OT                        |
| 162 | Yes         | 9       | 9-A  | 1000   | exp   | 0   | unif   | wholeT_0.5  | CBN, CBN-A                |
| 163 | Yes         | 9       | 9-A  | 1000   | exp   | Inf | last   | singleC     | OT, OT-A                  |
| 164 | Yes         | 9       | 9-A  | 1000   | exp   | Inf | last   | wholeT_0.01 | CBN, DiP, DiP-A, OT, OT-A |
| 165 | Yes         | 9       | 9-A  | 1000   | exp   | Inf | last   | wholeT_0.5  | OT, OT-A                  |
| 166 | Yes         | 9       | 9-A  | 1000   | exp   | Inf | unif   | singleC     | OT, OT-A                  |
| 167 | Yes         | 9       | 9-A  | 1000   | exp   | Inf | unif   | wholeT_0.01 | OT, OT-A                  |
| 168 | Yes         | 9       | 9-A  | 1000   | exp   | Inf | unif   | wholeT_0.5  | OT, OT-A                  |
| 169 | Yes         | 9       | 9-A  | 1000   | McF_4 | 0   | last   | singleC     | DiP, DiP-A, OT, OT-A      |
| 170 | Yes         | 9       | 9-A  | 1000   | McF_4 | 0   | last   | wholeT_0.01 | DiP, DiP-A, OT, OT-A      |
| 171 | Yes         | 9       | 9-A  | 1000   | McF_4 | 0   | last   | wholeT_0.5  | DiP, DiP-A, OT, OT-A      |
| 172 | Yes         | 9       | 9-A  | 1000   | McF_4 | 0   | unif   | singleC     | DiP, DiP-A, OT, OT-A      |
| 173 | Yes         | 9       | 9-A  | 1000   | McF_4 | 0   | unif   | wholeT_0.01 | DiP, DiP-A                |
| 174 | Yes         | 9       | 9-A  | 1000   | McF_4 | 0   | unif   | wholeT_0.5  | DiP, DiP-A, OT-A          |
| 175 | Yes         | 9       | 9-A  | 1000   | McF_4 | Inf | last   | singleC     | OT, OT-A                  |
| 176 | Yes         | 9       | 9-A  | 1000   | McF_4 | Inf | last   | wholeT_0.01 | DiP, OT                   |
| 177 | Yes         | 9       | 9-A  | 1000   | McF_4 | Inf | last   | wholeT_0.5  | DiP, DiP-A, OT, OT-A      |
| 178 | Yes         | 9       | 9-A  | 1000   | McF_4 | Inf | unif   | singleC     | DiP, DiP-A, OT, OT-A      |
| 179 | Yes         | 9       | 9-A  | 1000   | McF_4 | Inf | unif   | wholeT_0.01 | OT, OT-A                  |
| 180 | Yes         | 9       | 9-A  | 1000   | McF_4 | Inf | unif   | wholeT_0.5  | DiP, DiP-A, OT, OT-A      |
| 181 | Yes         | 9       | 9-A  | 1000   | McF_6 | 0   | last   | singleC     | OT                        |
| 182 | Yes         | 9       | 9-A  | 1000   | McF_6 | 0   | last   | wholeT_0.01 | DiP, OT                   |
| 183 | Yes         | 9       | 9-A  | 1000   | McF_6 | 0   | last   | wholeT_0.5  | DiP, OT                   |
| 184 | Yes         | 9       | 9-A  | 1000   | McF_6 | 0   | unif   | singleC     | DiP, DiP-A, OT, OT-A      |
| 185 | Yes         | 9       | 9-A  | 1000   | McF_6 | 0   | unif   | wholeT_0.01 | DiP, DiP-A                |
| 186 | Yes         | 9       | 9-A  | 1000   | McF_6 | 0   | unif   | wholeT_0.5  | DiP, DiP-A, OT            |
| 187 | Yes         | 9       | 9-A  | 1000   | McF_6 | Inf | last   | singleC     | DiP, OT                   |
| 188 | Yes         | 9       | 9-A  | 1000   | McF_6 | Inf | last   | wholeT_0.01 | OT                        |
| 189 | Yes         | 9       | 9-A  | 1000   | McF_6 | Inf | last   | wholeT_0.5  | DiP, OT                   |
| 190 | Yes         | 9       | 9-A  | 1000   | McF_6 | Inf | unif   | singleC     | DiP, DiP-A, OT, OT-A      |
| 191 | Yes         | 9       | 9-A  | 1000   | McF_6 | Inf | unif   | wholeT_0.01 | DiP, DiP-A, OT, OT-A      |
| 192 | Yes         | 9       | 9-A  | 1000   | McF_6 | Inf | unif   | wholeT_0.5  | DiP, DiP-A, OT, OT-A      |
| 193 | Yes         | 9       | 9-A  | 200    | Bozic | 0   | last   | singleC     | OT, OT-A                  |
| 194 | Yes         | 9       | 9-A  | 200    | Bozic | 0   | last   | wholeT_0.01 | OT, OT-A                  |
| 195 | Yes         | 9       | 9-A  | 200    | Bozic | 0   | last   | wholeT_0.5  | OT, OT-A                  |
| 196 | Yes         | 9       | 9-A  | 200    | Bozic | 0   | unif   | singleC     | CBN                       |
| 197 | Yes         | 9       | 9-A  | 200    | Bozic | 0   | unif   | wholeT_0.01 | DiP-A, OT, OT-A           |

Table 10: (continued)

|     | Conjunction | Drivers | Tree | S.Size | Model | sh  | S.Time | S.Type      | Best method(s)       |
|-----|-------------|---------|------|--------|-------|-----|--------|-------------|----------------------|
| 198 | Yes         | 9       | 9-A  | 200    | Bozic | 0   | unif   | wholeT_0.5  | CBN, CBN-A           |
| 199 | Yes         | 9       | 9-A  | 200    | Bozic | Inf | last   | singleC     | OT, OT-A             |
| 200 | Yes         | 9       | 9-A  | 200    | Bozic | Inf | last   | wholeT_0.01 | OT, OT-A             |
| 201 | Yes         | 9       | 9-A  | 200    | Bozic | Inf | last   | wholeT_0.5  | OT, OT-A             |
| 202 | Yes         | 9       | 9-A  | 200    | Bozic | Inf | unif   | singleC     | OT, OT-A             |
| 203 | Yes         | 9       | 9-A  | 200    | Bozic | Inf | unif   | wholeT_0.01 | OT, OT-A             |
| 204 | Yes         | 9       | 9-A  | 200    | Bozic | Inf | unif   | wholeT_0.5  | OT, OT-A             |
| 205 | Yes         | 9       | 9-A  | 200    | exp   | 0   | last   | singleC     | OT, OT-A             |
| 206 | Yes         | 9       | 9-A  | 200    | exp   | 0   | last   | wholeT_0.01 | OT, OT-A             |
| 207 | Yes         | 9       | 9-A  | 200    | exp   | 0   | last   | wholeT_0.5  | OT, OT-A             |
| 208 | Yes         | 9       | 9-A  | 200    | exp   | 0   | unif   | singleC     | CBN-A                |
| 209 | Yes         | 9       | 9-A  | 200    | exp   | 0   | unif   | wholeT_0.01 | OT, OT-A             |
| 210 | Yes         | 9       | 9-A  | 200    | exp   | 0   | unif   | wholeT_0.5  | CBN, CBN-A           |
| 211 | Yes         | 9       | 9-A  | 200    | exp   | Inf | last   | singleC     | OT, OT-A             |
| 212 | Yes         | 9       | 9-A  | 200    | exp   | Inf | last   | wholeT_0.01 | OT, OT-A             |
| 213 | Yes         | 9       | 9-A  | 200    | exp   | Inf | last   | wholeT_0.5  | OT, OT-A             |
| 214 | Yes         | 9       | 9-A  | 200    | exp   | Inf | unif   | singleC     | OT, OT-A             |
| 215 | Yes         | 9       | 9-A  | 200    | exp   | Inf | unif   | wholeT_0.01 | CBN-A, OT, OT-A      |
| 216 | Yes         | 9       | 9-A  | 200    | exp   | Inf | unif   | wholeT_0.5  | OT, OT-A             |
| 217 | Yes         | 9       | 9-A  | 200    | McF_4 | 0   | last   | singleC     | DiP-A, OT, OT-A      |
| 218 | Yes         | 9       | 9-A  | 200    | McF_4 | 0   | last   | wholeT_0.01 | DiP, DiP-A           |
| 219 | Yes         | 9       | 9-A  | 200    | McF_4 | 0   | last   | wholeT_0.5  | DiP-A, OT, OT-A      |
| 220 | Yes         | 9       | 9-A  | 200    | McF_4 | 0   | unif   | singleC     | OT, OT-A             |
| 221 | Yes         | 9       | 9-A  | 200    | McF_4 | 0   | unif   | wholeT_0.01 | DiP, DiP-A           |
| 222 | Yes         | 9       | 9-A  | 200    | McF_4 | 0   | unif   | wholeT_0.5  | OT, OT-A             |
| 223 | Yes         | 9       | 9-A  | 200    | McF_4 | Inf | last   | singleC     | OT, OT-A             |
| 224 | Yes         | 9       | 9-A  | 200    | McF_4 | Inf | last   | wholeT_0.01 | DiP-A, OT            |
| 225 | Yes         | 9       | 9-A  | 200    | McF_4 | Inf | last   | wholeT_0.5  | OT, OT-A             |
| 226 | Yes         | 9       | 9-A  | 200    | McF_4 | Inf | unif   | singleC     | OT, OT-A             |
| 227 | Yes         | 9       | 9-A  | 200    | McF_4 | Inf | unif   | wholeT_0.01 | OT, OT-A             |
| 228 | Yes         | 9       | 9-A  | 200    | McF_4 | Inf | unif   | wholeT_0.5  | OT, OT-A             |
| 229 | Yes         | 9       | 9-A  | 200    | McF_6 | 0   | last   | singleC     | DiP, OT              |
| 230 | Yes         | 9       | 9-A  | 200    | McF_6 | 0   | last   | wholeT_0.01 | DiP, OT              |
| 231 | Yes         | 9       | 9-A  | 200    | McF_6 | 0   | last   | wholeT_0.5  | OT                   |
| 232 | Yes         | 9       | 9-A  | 200    | McF_6 | 0   | unif   | singleC     | DiP, DiP-A, OT, OT-A |
| 233 | Yes         | 9       | 9-A  | 200    | McF_6 | 0   | unif   | wholeT_0.01 | DiP, DiP-A, OT-A     |
| 234 | Yes         | 9       | 9-A  | 200    | McF_6 | 0   | unif   | wholeT_0.5  | DiP, DiP-A, OT, OT-A |
| 235 | Yes         | 9       | 9-A  | 200    | McF_6 | Inf | last   | singleC     | OT                   |
| 236 | Yes         | 9       | 9-A  | 200    | McF_6 | Inf | last   | wholeT_0.01 | OT                   |
| 237 | Yes         | 9       | 9-A  | 200    | McF_6 | Inf | last   | wholeT_0.5  | OT                   |



Table 10: (continued)

|     | Conjunction | Drivers | Tree | S.Size | Model | sh  | S.Time | S.Type      | Best method(s)       |
|-----|-------------|---------|------|--------|-------|-----|--------|-------------|----------------------|
| 238 | Yes         | 9       | 9-A  | 200    | McF_6 | Inf | unif   | singleC     | OT, OT-A             |
| 239 | Yes         | 9       | 9-A  | 200    | McF_6 | Inf | unif   | wholeT_0.01 | CBN, DiP-A, OT, OT-A |
| 240 | Yes         | 9       | 9-A  | 200    | McF_6 | Inf | unif   | wholeT_0.5  | DiP, DiP-A, OT, OT-A |
| 241 | Yes         | 9       | 9-A  | 100    | Bozic | 0   | last   | singleC     | OT, OT-A             |
| 242 | Yes         | 9       | 9-A  | 100    | Bozic | 0   | last   | wholeT_0.01 | OT, OT-A             |
| 243 | Yes         | 9       | 9-A  | 100    | Bozic | 0   | last   | wholeT_0.5  | OT, OT-A             |
| 244 | Yes         | 9       | 9-A  | 100    | Bozic | 0   | unif   | singleC     | CBN, CBN-A           |
| 245 | Yes         | 9       | 9-A  | 100    | Bozic | 0   | unif   | wholeT_0.01 | OT, OT-A             |
| 246 | Yes         | 9       | 9-A  | 100    | Bozic | 0   | unif   | wholeT_0.5  | CBN, CBN-A           |
| 247 | Yes         | 9       | 9-A  | 100    | Bozic | Inf | last   | singleC     | OT, OT-A             |
| 248 | Yes         | 9       | 9-A  | 100    | Bozic | Inf | last   | wholeT_0.01 | OT, OT-A             |
| 249 | Yes         | 9       | 9-A  | 100    | Bozic | Inf | last   | wholeT_0.5  | OT, OT-A             |
| 250 | Yes         | 9       | 9-A  | 100    | Bozic | Inf | unif   | singleC     | OT, OT-A             |
| 251 | Yes         | 9       | 9-A  | 100    | Bozic | Inf | unif   | wholeT_0.01 | OT, OT-A             |
| 252 | Yes         | 9       | 9-A  | 100    | Bozic | Inf | unif   | wholeT_0.5  | OT, OT-A             |
| 253 | Yes         | 9       | 9-A  | 100    | exp   | 0   | last   | singleC     | OT, OT-A             |
| 254 | Yes         | 9       | 9-A  | 100    | exp   | 0   | last   | wholeT_0.01 | OT, OT-A             |
| 255 | Yes         | 9       | 9-A  | 100    | exp   | 0   | last   | wholeT_0.5  | OT, OT-A             |
| 256 | Yes         | 9       | 9-A  | 100    | exp   | 0   | unif   | singleC     | CBN, CBN-A           |
| 257 | Yes         | 9       | 9-A  | 100    | exp   | 0   | unif   | wholeT_0.01 | OT, OT-A             |
| 258 | Yes         | 9       | 9-A  | 100    | exp   | 0   | unif   | wholeT_0.5  | CBN, CBN-A           |
| 259 | Yes         | 9       | 9-A  | 100    | exp   | Inf | last   | singleC     | OT, OT-A             |
| 260 | Yes         | 9       | 9-A  | 100    | exp   | Inf | last   | wholeT_0.01 | OT, OT-A             |
| 261 | Yes         | 9       | 9-A  | 100    | exp   | Inf | last   | wholeT_0.5  | OT, OT-A             |
| 262 | Yes         | 9       | 9-A  | 100    | exp   | Inf | unif   | singleC     | OT, OT-A             |
| 263 | Yes         | 9       | 9-A  | 100    | exp   | Inf | unif   | wholeT_0.01 | OT, OT-A             |
| 264 | Yes         | 9       | 9-A  | 100    | exp   | Inf | unif   | wholeT_0.5  | OT, OT-A             |
| 265 | Yes         | 9       | 9-A  | 100    | McF_4 | 0   | last   | singleC     | OT, OT-A             |
| 266 | Yes         | 9       | 9-A  | 100    | McF_4 | 0   | last   | wholeT_0.01 | DiP, DiP-A           |
| 267 | Yes         | 9       | 9-A  | 100    | McF_4 | 0   | last   | wholeT_0.5  | OT, OT-A             |
| 268 | Yes         | 9       | 9-A  | 100    | McF_4 | 0   | unif   | singleC     | OT, OT-A             |
| 269 | Yes         | 9       | 9-A  | 100    | McF_4 | 0   | unif   | wholeT_0.01 | OT, OT-A             |
| 270 | Yes         | 9       | 9-A  | 100    | McF_4 | 0   | unif   | wholeT_0.5  | OT, OT-A             |
| 271 | Yes         | 9       | 9-A  | 100    | McF_4 | Inf | last   | singleC     | OT, OT-A             |
| 272 | Yes         | 9       | 9-A  | 100    | McF_4 | Inf | last   | wholeT_0.01 | OT                   |
| 273 | Yes         | 9       | 9-A  | 100    | McF_4 | Inf | last   | wholeT_0.5  | OT, OT-A             |
| 274 | Yes         | 9       | 9-A  | 100    | McF_4 | Inf | unif   | singleC     | OT, OT-A             |
| 275 | Yes         | 9       | 9-A  | 100    | McF_4 | Inf | unif   | wholeT_0.01 | OT, OT-A             |
| 276 | Yes         | 9       | 9-A  | 100    | McF_4 | Inf | unif   | wholeT_0.5  | OT, OT-A             |
| 277 | Yes         | 9       | 9-A  | 100    | McF_6 | 0   | last   | singleC     | OT                   |

Table 10: (continued)

|     | Conjunction | Drivers | Tree | S.Size | Model | sh  | S.Time | S.Type      | Best method(s)       |
|-----|-------------|---------|------|--------|-------|-----|--------|-------------|----------------------|
| 278 | Yes         | 9       | 9-A  | 100    | McF_6 | 0   | last   | wholeT_0.01 | OT                   |
| 279 | Yes         | 9       | 9-A  | 100    | McF_6 | 0   | last   | wholeT_0.5  | OT                   |
| 280 | Yes         | 9       | 9-A  | 100    | McF_6 | 0   | unif   | singleC     | OT                   |
| 281 | Yes         | 9       | 9-A  | 100    | McF_6 | 0   | unif   | wholeT_0.01 | DiP, DiP-A, OT, OT-A |
| 282 | Yes         | 9       | 9-A  | 100    | McF_6 | 0   | unif   | wholeT_0.5  | OT, OT-A             |
| 283 | Yes         | 9       | 9-A  | 100    | McF_6 | Inf | last   | singleC     | OT                   |
| 284 | Yes         | 9       | 9-A  | 100    | McF_6 | Inf | last   | wholeT_0.01 | OT                   |
| 285 | Yes         | 9       | 9-A  | 100    | McF_6 | Inf | last   | wholeT_0.5  | OT                   |
| 286 | Yes         | 9       | 9-A  | 100    | McF_6 | Inf | unif   | singleC     | OT, OT-A             |
| 287 | Yes         | 9       | 9-A  | 100    | McF_6 | Inf | unif   | wholeT_0.01 | OT, OT-A             |
| 288 | Yes         | 9       | 9-A  | 100    | McF_6 | Inf | unif   | wholeT_0.5  | OT, OT-A             |
| 289 | Yes         | 7       | 7-A  | 1000   | Bozic | 0   | last   | singleC     | OT-A                 |
| 290 | Yes         | 7       | 7-A  | 1000   | Bozic | 0   | last   | wholeT_0.01 | DiP-A                |
| 291 | Yes         | 7       | 7-A  | 1000   | Bozic | 0   | last   | wholeT_0.5  | OT-A                 |
| 292 | Yes         | 7       | 7-A  | 1000   | Bozic | 0   | unif   | singleC     | OT, OT-A             |
| 293 | Yes         | 7       | 7-A  | 1000   | Bozic | 0   | unif   | wholeT_0.01 | CBN, CBN-A           |
| 294 | Yes         | 7       | 7-A  | 1000   | Bozic | 0   | unif   | wholeT_0.5  | OT, OT-A             |
| 295 | Yes         | 7       | 7-A  | 1000   | Bozic | Inf | last   | singleC     | DiP-A, OT, OT-A      |
| 296 | Yes         | 7       | 7-A  | 1000   | Bozic | Inf | last   | wholeT_0.01 | DiP-A, OT, OT-A      |
| 297 | Yes         | 7       | 7-A  | 1000   | Bozic | Inf | last   | wholeT_0.5  | DiP-A, OT, OT-A      |
| 298 | Yes         | 7       | 7-A  | 1000   | Bozic | Inf | unif   | singleC     | CBN, CBN-A           |
| 299 | Yes         | 7       | 7-A  | 1000   | Bozic | Inf | unif   | wholeT_0.01 | CBN, CBN-A, OT, OT-A |
| 300 | Yes         | 7       | 7-A  | 1000   | Bozic | Inf | unif   | wholeT_0.5  | CBN, CBN-A           |
| 301 | Yes         | 7       | 7-A  | 1000   | exp   | 0   | last   | singleC     | OT-A                 |
| 302 | Yes         | 7       | 7-A  | 1000   | exp   | 0   | last   | wholeT_0.01 | OT-A                 |
| 303 | Yes         | 7       | 7-A  | 1000   | exp   | 0   | last   | wholeT_0.5  | OT-A                 |
| 304 | Yes         | 7       | 7-A  | 1000   | exp   | 0   | unif   | singleC     | OT, OT-A             |
| 305 | Yes         | 7       | 7-A  | 1000   | exp   | 0   | unif   | wholeT_0.01 | CBN, CBN-A           |
| 306 | Yes         | 7       | 7-A  | 1000   | exp   | 0   | unif   | wholeT_0.5  | OT, OT-A             |
| 307 | Yes         | 7       | 7-A  | 1000   | exp   | Inf | last   | singleC     | OT-A                 |
| 308 | Yes         | 7       | 7-A  | 1000   | exp   | Inf | last   | wholeT_0.01 | DiP-A, OT-A          |
| 309 | Yes         | 7       | 7-A  | 1000   | exp   | Inf | last   | wholeT_0.5  | OT-A                 |
| 310 | Yes         | 7       | 7-A  | 1000   | exp   | Inf | unif   | singleC     | CBN, CBN-A, OT, OT-A |
| 311 | Yes         | 7       | 7-A  | 1000   | exp   | Inf | unif   | wholeT_0.01 | CBN, CBN-A           |
| 312 | Yes         | 7       | 7-A  | 1000   | exp   | Inf | unif   | wholeT_0.5  | CBN, CBN-A           |
| 313 | Yes         | 7       | 7-A  | 1000   | McF_4 | 0   | last   | singleC     | DiP-A, OT, OT-A      |
| 314 | Yes         | 7       | 7-A  | 1000   | McF_4 | 0   | last   | wholeT_0.01 | OT, OT-A             |
| 315 | Yes         | 7       | 7-A  | 1000   | McF_4 | 0   | last   | wholeT_0.5  | DiP-A, OT-A          |
| 316 | Yes         | 7       | 7-A  | 1000   | McF_4 | 0   | unif   | singleC     | DiP, DiP-A           |
| 317 | Yes         | 7       | 7-A  | 1000   | McF_4 | 0   | unif   | wholeT_0.01 | DiP, DiP-A, OT       |

Table 10: (continued)

|     | Conjunction | Drivers | Tree | S.Size | Model | sh  | S.Time | S.Type      | Best method(s)       |
|-----|-------------|---------|------|--------|-------|-----|--------|-------------|----------------------|
| 318 | Yes         | 7       | 7-A  | 1000   | McF_4 | 0   | unif   | wholeT_0.5  | DiP, DiP-A, OT       |
| 319 | Yes         | 7       | 7-A  | 1000   | McF_4 | Inf | last   | singleC     | DiP-A, OT-A          |
| 320 | Yes         | 7       | 7-A  | 1000   | McF_4 | Inf | last   | wholeT_0.01 | OT, OT-A             |
| 321 | Yes         | 7       | 7-A  | 1000   | McF_4 | Inf | last   | wholeT_0.5  | DiP-A, OT-A          |
| 322 | Yes         | 7       | 7-A  | 1000   | McF_4 | Inf | unif   | singleC     | OT, OT-A             |
| 323 | Yes         | 7       | 7-A  | 1000   | McF_4 | Inf | unif   | wholeT_0.01 | DiP-A, OT, OT-A      |
| 324 | Yes         | 7       | 7-A  | 1000   | McF_4 | Inf | unif   | wholeT_0.5  | DiP-A, OT, OT-A      |
| 325 | Yes         | 7       | 7-A  | 1000   | McF_6 | 0   | last   | singleC     | DiP, OT, OT-A        |
| 326 | Yes         | 7       | 7-A  | 1000   | McF_6 | 0   | last   | wholeT_0.01 | DiP, OT, OT-A        |
| 327 | Yes         | 7       | 7-A  | 1000   | McF_6 | 0   | last   | wholeT_0.5  | DiP, OT, OT-A        |
| 328 | Yes         | 7       | 7-A  | 1000   | McF_6 | 0   | unif   | singleC     | none                 |
| 329 | Yes         | 7       | 7-A  | 1000   | McF_6 | 0   | unif   | wholeT_0.01 | none                 |
| 330 | Yes         | 7       | 7-A  | 1000   | McF_6 | 0   | unif   | wholeT_0.5  | none                 |
| 331 | Yes         | 7       | 7-A  | 1000   | McF_6 | Inf | last   | singleC     | DiP, DiP-A, OT, OT-A |
| 332 | Yes         | 7       | 7-A  | 1000   | McF_6 | Inf | last   | wholeT_0.01 | OT, OT-A             |
| 333 | Yes         | 7       | 7-A  | 1000   | McF_6 | Inf | last   | wholeT_0.5  | DiP, OT, OT-A        |
| 334 | Yes         | 7       | 7-A  | 1000   | McF_6 | Inf | unif   | singleC     | none                 |
| 335 | Yes         | 7       | 7-A  | 1000   | McF_6 | Inf | unif   | wholeT_0.01 | CBN, CBN-A, OT, OT-A |
| 336 | Yes         | 7       | 7-A  | 1000   | McF_6 | Inf | unif   | wholeT_0.5  | none                 |
| 337 | Yes         | 7       | 7-A  | 200    | Bozic | 0   | last   | singleC     | OT-A                 |
| 338 | Yes         | 7       | 7-A  | 200    | Bozic | 0   | last   | wholeT_0.01 | OT-A                 |
| 339 | Yes         | 7       | 7-A  | 200    | Bozic | 0   | last   | wholeT_0.5  | OT-A                 |
| 340 | Yes         | 7       | 7-A  | 200    | Bozic | 0   | unif   | singleC     | OT, OT-A             |
| 341 | Yes         | 7       | 7-A  | 200    | Bozic | 0   | unif   | wholeT_0.01 | CBN, CBN-A           |
| 342 | Yes         | 7       | 7-A  | 200    | Bozic | 0   | unif   | wholeT_0.5  | OT, OT-A             |
| 343 | Yes         | 7       | 7-A  | 200    | Bozic | Inf | last   | singleC     | OT-A                 |
| 344 | Yes         | 7       | 7-A  | 200    | Bozic | Inf | last   | wholeT_0.01 | OT-A                 |
| 345 | Yes         | 7       | 7-A  | 200    | Bozic | Inf | last   | wholeT_0.5  | OT-A                 |
| 346 | Yes         | 7       | 7-A  | 200    | Bozic | Inf | unif   | singleC     | CBN, CBN-A, OT, OT-A |
| 347 | Yes         | 7       | 7-A  | 200    | Bozic | Inf | unif   | wholeT_0.01 | CBN, CBN-A           |
| 348 | Yes         | 7       | 7-A  | 200    | Bozic | Inf | unif   | wholeT_0.5  | CBN, CBN-A, OT, OT-A |
| 349 | Yes         | 7       | 7-A  | 200    | exp   | 0   | last   | singleC     | OT-A                 |
| 350 | Yes         | 7       | 7-A  | 200    | exp   | 0   | last   | wholeT_0.01 | OT-A                 |
| 351 | Yes         | 7       | 7-A  | 200    | exp   | 0   | last   | wholeT_0.5  | OT-A                 |
| 352 | Yes         | 7       | 7-A  | 200    | exp   | 0   | unif   | singleC     | CBN, CBN-A           |
| 353 | Yes         | 7       | 7-A  | 200    | exp   | 0   | unif   | wholeT_0.01 | CBN, CBN-A, OT, OT-A |
| 354 | Yes         | 7       | 7-A  | 200    | exp   | 0   | unif   | wholeT_0.5  | CBN, CBN-A           |
| 355 | Yes         | 7       | 7-A  | 200    | exp   | Inf | last   | singleC     | OT-A                 |
| 356 | Yes         | 7       | 7-A  | 200    | exp   | Inf | last   | wholeT_0.01 | OT-A                 |
| 357 | Yes         | 7       | 7-A  | 200    | exp   | Inf | last   | wholeT_0.5  | OT-A                 |

Table 10: (continued)

|     | Conjunction | Drivers | Tree | S.Size | Model | sh  | S.Time | S.Type      | Best method(s)       |
|-----|-------------|---------|------|--------|-------|-----|--------|-------------|----------------------|
| 358 | Yes         | 7       | 7-A  | 200    | exp   | Inf | unif   | singleC     | CBN, CBN-A, OT, OT-A |
| 359 | Yes         | 7       | 7-A  | 200    | exp   | Inf | unif   | wholeT_0.01 | CBN, CBN-A           |
| 360 | Yes         | 7       | 7-A  | 200    | exp   | Inf | unif   | wholeT_0.5  | CBN, CBN-A, OT, OT-A |
| 361 | Yes         | 7       | 7-A  | 200    | McF_4 | 0   | last   | singleC     | OT, OT-A             |
| 362 | Yes         | 7       | 7-A  | 200    | McF_4 | 0   | last   | wholeT_0.01 | OT-A                 |
| 363 | Yes         | 7       | 7-A  | 200    | McF_4 | 0   | last   | wholeT_0.5  | OT-A                 |
| 364 | Yes         | 7       | 7-A  | 200    | McF_4 | 0   | unif   | singleC     | OT, OT-A             |
| 365 | Yes         | 7       | 7-A  | 200    | McF_4 | 0   | unif   | wholeT_0.01 | DiP-A, OT-A          |
| 366 | Yes         | 7       | 7-A  | 200    | McF_4 | 0   | unif   | wholeT_0.5  | OT, OT-A             |
| 367 | Yes         | 7       | 7-A  | 200    | McF_4 | Inf | last   | singleC     | OT-A                 |
| 368 | Yes         | 7       | 7-A  | 200    | McF_4 | Inf | last   | wholeT_0.01 | OT, OT-A             |
| 369 | Yes         | 7       | 7-A  | 200    | McF_4 | Inf | last   | wholeT_0.5  | OT-A                 |
| 370 | Yes         | 7       | 7-A  | 200    | McF_4 | Inf | unif   | singleC     | OT, OT-A             |
| 371 | Yes         | 7       | 7-A  | 200    | McF_4 | Inf | unif   | wholeT_0.01 | OT, OT-A             |
| 372 | Yes         | 7       | 7-A  | 200    | McF_4 | Inf | unif   | wholeT_0.5  | OT, OT-A             |
| 373 | Yes         | 7       | 7-A  | 200    | McF_6 | 0   | last   | singleC     | OT, OT-A             |
| 374 | Yes         | 7       | 7-A  | 200    | McF_6 | 0   | last   | wholeT_0.01 | OT, OT-A             |
| 375 | Yes         | 7       | 7-A  | 200    | McF_6 | 0   | last   | wholeT_0.5  | OT, OT-A             |
| 376 | Yes         | 7       | 7-A  | 200    | McF_6 | 0   | unif   | singleC     | CBN, CBN-A, DiP-A    |
| 377 | Yes         | 7       | 7-A  | 200    | McF_6 | 0   | unif   | wholeT_0.01 | none                 |
| 378 | Yes         | 7       | 7-A  | 200    | McF_6 | 0   | unif   | wholeT_0.5  | CBN, CBN-A           |
| 379 | Yes         | 7       | 7-A  | 200    | McF_6 | Inf | last   | singleC     | DiP-A, OT, OT-A      |
| 380 | Yes         | 7       | 7-A  | 200    | McF_6 | Inf | last   | wholeT_0.01 | OT, OT-A             |
| 381 | Yes         | 7       | 7-A  | 200    | McF_6 | Inf | last   | wholeT_0.5  | DiP-A, OT, OT-A      |
| 382 | Yes         | 7       | 7-A  | 200    | McF_6 | Inf | unif   | singleC     | CBN, CBN-A           |
| 383 | Yes         | 7       | 7-A  | 200    | McF_6 | Inf | unif   | wholeT_0.01 | CBN, CBN-A           |
| 384 | Yes         | 7       | 7-A  | 200    | McF_6 | Inf | unif   | wholeT_0.5  | CBN, CBN-A           |
| 385 | Yes         | 7       | 7-A  | 100    | Bozic | 0   | last   | singleC     | OT-A                 |
| 386 | Yes         | 7       | 7-A  | 100    | Bozic | 0   | last   | wholeT_0.01 | OT-A                 |
| 387 | Yes         | 7       | 7-A  | 100    | Bozic | 0   | last   | wholeT_0.5  | OT-A                 |
| 388 | Yes         | 7       | 7-A  | 100    | Bozic | 0   | unif   | singleC     | OT, OT-A             |
| 389 | Yes         | 7       | 7-A  | 100    | Bozic | 0   | unif   | wholeT_0.01 | CBN, CBN-A, OT-A     |
| 390 | Yes         | 7       | 7-A  | 100    | Bozic | 0   | unif   | wholeT_0.5  | OT, OT-A             |
| 391 | Yes         | 7       | 7-A  | 100    | Bozic | Inf | last   | singleC     | OT-A                 |
| 392 | Yes         | 7       | 7-A  | 100    | Bozic | Inf | last   | wholeT_0.01 | OT-A                 |
| 393 | Yes         | 7       | 7-A  | 100    | Bozic | Inf | last   | wholeT_0.5  | OT-A                 |
| 394 | Yes         | 7       | 7-A  | 100    | Bozic | Inf | unif   | singleC     | CBN, CBN-A           |
| 395 | Yes         | 7       | 7-A  | 100    | Bozic | Inf | unif   | wholeT_0.01 | CBN, CBN-A           |
| 396 | Yes         | 7       | 7-A  | 100    | Bozic | Inf | unif   | wholeT_0.5  | CBN, CBN-A, OT, OT-A |
| 397 | Yes         | 7       | 7-A  | 100    | exp   | 0   | last   | singleC     | OT-A                 |

Table 10: (continued)

|     | Conjunction | Drivers | Tree | S.Size | Model | sh  | S.Time | S.Type      | Best method(s)       |
|-----|-------------|---------|------|--------|-------|-----|--------|-------------|----------------------|
| 398 | Yes         | 7       | 7-A  | 100    | exp   | 0   | last   | wholeT_0.01 | OT-A                 |
| 399 | Yes         | 7       | 7-A  | 100    | exp   | 0   | last   | wholeT_0.5  | OT-A                 |
| 400 | Yes         | 7       | 7-A  | 100    | exp   | 0   | unif   | singleC     | OT, OT-A             |
| 401 | Yes         | 7       | 7-A  | 100    | exp   | 0   | unif   | wholeT_0.01 | OT, OT-A             |
| 402 | Yes         | 7       | 7-A  | 100    | exp   | 0   | unif   | wholeT_0.5  | CBN, CBN-A           |
| 403 | Yes         | 7       | 7-A  | 100    | exp   | Inf | last   | singleC     | OT-A                 |
| 404 | Yes         | 7       | 7-A  | 100    | exp   | Inf | last   | wholeT_0.01 | OT-A                 |
| 405 | Yes         | 7       | 7-A  | 100    | exp   | Inf | last   | wholeT_0.5  | OT-A                 |
| 406 | Yes         | 7       | 7-A  | 100    | exp   | Inf | unif   | singleC     | OT, OT-A             |
| 407 | Yes         | 7       | 7-A  | 100    | exp   | Inf | unif   | wholeT_0.01 | CBN, CBN-A, OT, OT-A |
| 408 | Yes         | 7       | 7-A  | 100    | exp   | Inf | unif   | wholeT_0.5  | OT, OT-A             |
| 409 | Yes         | 7       | 7-A  | 100    | McF_4 | 0   | last   | singleC     | OT-A                 |
| 410 | Yes         | 7       | 7-A  | 100    | McF_4 | 0   | last   | wholeT_0.01 | OT, OT-A             |
| 411 | Yes         | 7       | 7-A  | 100    | McF_4 | 0   | last   | wholeT_0.5  | OT-A                 |
| 412 | Yes         | 7       | 7-A  | 100    | McF_4 | 0   | unif   | singleC     | OT, OT-A             |
| 413 | Yes         | 7       | 7-A  | 100    | McF_4 | 0   | unif   | wholeT_0.01 | OT, OT-A             |
| 414 | Yes         | 7       | 7-A  | 100    | McF_4 | 0   | unif   | wholeT_0.5  | OT, OT-A             |
| 415 | Yes         | 7       | 7-A  | 100    | McF_4 | Inf | last   | singleC     | OT-A                 |
| 416 | Yes         | 7       | 7-A  | 100    | McF_4 | Inf | last   | wholeT_0.01 | OT, OT-A             |
| 417 | Yes         | 7       | 7-A  | 100    | McF_4 | Inf | last   | wholeT_0.5  | OT-A                 |
| 418 | Yes         | 7       | 7-A  | 100    | McF_4 | Inf | unif   | singleC     | OT, OT-A             |
| 419 | Yes         | 7       | 7-A  | 100    | McF_4 | Inf | unif   | wholeT_0.01 | OT, OT-A             |
| 420 | Yes         | 7       | 7-A  | 100    | McF_4 | Inf | unif   | wholeT_0.5  | OT, OT-A             |
| 421 | Yes         | 7       | 7-A  | 100    | McF_6 | 0   | last   | singleC     | OT, OT-A             |
| 422 | Yes         | 7       | 7-A  | 100    | McF_6 | 0   | last   | wholeT_0.01 | OT, OT-A             |
| 423 | Yes         | 7       | 7-A  | 100    | McF_6 | 0   | last   | wholeT_0.5  | OT, OT-A             |
| 424 | Yes         | 7       | 7-A  | 100    | McF_6 | 0   | unif   | singleC     | CBN                  |
| 425 | Yes         | 7       | 7-A  | 100    | McF_6 | 0   | unif   | wholeT_0.01 | CBN, CBN-A, DiP-A    |
| 426 | Yes         | 7       | 7-A  | 100    | McF_6 | 0   | unif   | wholeT_0.5  | CBN, CBN-A           |
| 427 | Yes         | 7       | 7-A  | 100    | McF_6 | Inf | last   | singleC     | OT, OT-A             |
| 428 | Yes         | 7       | 7-A  | 100    | McF_6 | Inf | last   | wholeT_0.01 | OT, OT-A             |
| 429 | Yes         | 7       | 7-A  | 100    | McF_6 | Inf | last   | wholeT_0.5  | OT, OT-A             |
| 430 | Yes         | 7       | 7-A  | 100    | McF_6 | Inf | unif   | singleC     | CBN, CBN-A           |
| 431 | Yes         | 7       | 7-A  | 100    | McF_6 | Inf | unif   | wholeT_0.01 | CBN, CBN-A           |
| 432 | Yes         | 7       | 7-A  | 100    | McF_6 | Inf | unif   | wholeT_0.5  | CBN, CBN-A           |
| 433 | No          | 11      | 11-B | 1000   | Bozic | 0   | last   | singleC     | OT, OT-A             |
| 434 | No          | 11      | 11-B | 1000   | Bozic | 0   | last   | wholeT_0.01 | DiP, DiP-A, OT, OT-A |
| 435 | No          | 11      | 11-B | 1000   | Bozic | 0   | last   | wholeT_0.5  | OT, OT-A             |
| 436 | No          | 11      | 11-B | 1000   | Bozic | 0   | unif   | singleC     | DiP, DiP-A, OT, OT-A |
| 437 | No          | 11      | 11-B | 1000   | Bozic | 0   | unif   | wholeT_0.01 | DiP, DiP-A, OT, OT-A |

Table 10: (continued)

|     | Conjunction | Drivers | Tree | S.Size | Model | sh  | S.Time | S.Type      | Best method(s)       |
|-----|-------------|---------|------|--------|-------|-----|--------|-------------|----------------------|
| 438 | No          | 11      | 11-B | 1000   | Bozic | 0   | unif   | wholeT_0.5  | OT, OT-A             |
| 439 | No          | 11      | 11-B | 1000   | Bozic | Inf | last   | singleC     | OT, OT-A             |
| 440 | No          | 11      | 11-B | 1000   | Bozic | Inf | last   | wholeT_0.01 | DiP-A                |
| 441 | No          | 11      | 11-B | 1000   | Bozic | Inf | last   | wholeT_0.5  | OT, OT-A             |
| 442 | No          | 11      | 11-B | 1000   | Bozic | Inf | unif   | singleC     | DiP-A, OT, OT-A      |
| 443 | No          | 11      | 11-B | 1000   | Bozic | Inf | unif   | wholeT_0.01 | OT, OT-A             |
| 444 | No          | 11      | 11-B | 1000   | Bozic | Inf | unif   | wholeT_0.5  | OT, OT-A             |
| 445 | No          | 11      | 11-B | 1000   | exp   | 0   | last   | singleC     | OT, OT-A             |
| 446 | No          | 11      | 11-B | 1000   | exp   | 0   | last   | wholeT_0.01 | DiP-A, OT, OT-A      |
| 447 | No          | 11      | 11-B | 1000   | exp   | 0   | last   | wholeT_0.5  | OT, OT-A             |
| 448 | No          | 11      | 11-B | 1000   | exp   | 0   | unif   | singleC     | OT, OT-A             |
| 449 | No          | 11      | 11-B | 1000   | exp   | 0   | unif   | wholeT_0.01 | DiP-A, OT, OT-A      |
| 450 | No          | 11      | 11-B | 1000   | exp   | 0   | unif   | wholeT_0.5  | OT, OT-A             |
| 451 | No          | 11      | 11-B | 1000   | exp   | Inf | last   | singleC     | OT, OT-A             |
| 452 | No          | 11      | 11-B | 1000   | exp   | Inf | last   | wholeT_0.01 | OT, OT-A             |
| 453 | No          | 11      | 11-B | 1000   | exp   | Inf | last   | wholeT_0.5  | OT, OT-A             |
| 454 | No          | 11      | 11-B | 1000   | exp   | Inf | unif   | singleC     | OT, OT-A             |
| 455 | No          | 11      | 11-B | 1000   | exp   | Inf | unif   | wholeT_0.01 | OT, OT-A             |
| 456 | No          | 11      | 11-B | 1000   | exp   | Inf | unif   | wholeT_0.5  | OT, OT-A             |
| 457 | No          | 11      | 11-B | 1000   | McF_4 | 0   | last   | singleC     | DiP, DiP-A, OT, OT-A |
| 458 | No          | 11      | 11-B | 1000   | McF_4 | 0   | last   | wholeT_0.01 | DiP-A, OT, OT-A      |
| 459 | No          | 11      | 11-B | 1000   | McF_4 | 0   | last   | wholeT_0.5  | DiP-A, OT, OT-A      |
| 460 | No          | 11      | 11-B | 1000   | McF_4 | 0   | unif   | singleC     | DiP, DiP-A           |
| 461 | No          | 11      | 11-B | 1000   | McF_4 | 0   | unif   | wholeT_0.01 | DiP, DiP-A, OT, OT-A |
| 462 | No          | 11      | 11-B | 1000   | McF_4 | 0   | unif   | wholeT_0.5  | DiP, DiP-A, OT       |
| 463 | No          | 11      | 11-B | 1000   | McF_4 | Inf | last   | singleC     | OT, OT-A             |
| 464 | No          | 11      | 11-B | 1000   | McF_4 | Inf | last   | wholeT_0.01 | DiP, OT, OT-A        |
| 465 | No          | 11      | 11-B | 1000   | McF_4 | Inf | last   | wholeT_0.5  | DiP-A, OT, OT-A      |
| 466 | No          | 11      | 11-B | 1000   | McF_4 | Inf | unif   | singleC     | DiP, DiP-A, OT, OT-A |
| 467 | No          | 11      | 11-B | 1000   | McF_4 | Inf | unif   | wholeT_0.01 | OT, OT-A             |
| 468 | No          | 11      | 11-B | 1000   | McF_4 | Inf | unif   | wholeT_0.5  | DiP, DiP-A, OT, OT-A |
| 469 | No          | 11      | 11-B | 1000   | McF_6 | 0   | last   | singleC     | DiP, OT              |
| 470 | No          | 11      | 11-B | 1000   | McF_6 | 0   | last   | wholeT_0.01 | DiP, OT              |
| 471 | No          | 11      | 11-B | 1000   | McF_6 | 0   | last   | wholeT_0.5  | DiP, OT              |
| 472 | No          | 11      | 11-B | 1000   | McF_6 | 0   | unif   | singleC     | DiP, DiP-A, OT, OT-A |
| 473 | No          | 11      | 11-B | 1000   | McF_6 | 0   | unif   | wholeT_0.01 | DiP, DiP-A, OT, OT-A |
| 474 | No          | 11      | 11-B | 1000   | McF_6 | 0   | unif   | wholeT_0.5  | DiP, DiP-A           |
| 475 | No          | 11      | 11-B | 1000   | McF_6 | Inf | last   | singleC     | DiP, OT              |
| 476 | No          | 11      | 11-B | 1000   | McF_6 | Inf | last   | wholeT_0.01 | DiP, OT              |
| 477 | No          | 11      | 11-B | 1000   | McF_6 | Inf | last   | wholeT_0.5  | DiP, OT              |

Table 10: (continued)

|     | Conjunction | Drivers | Tree | S.Size | Model | sh  | S.Time | S.Type      | Best method(s)       |
|-----|-------------|---------|------|--------|-------|-----|--------|-------------|----------------------|
| 478 | No          | 11      | 11-B | 1000   | McF_6 | Inf | unif   | singleC     | DiP, DiP-A           |
| 479 | No          | 11      | 11-B | 1000   | McF_6 | Inf | unif   | wholeT_0.01 | DiP, DiP-A           |
| 480 | No          | 11      | 11-B | 1000   | McF_6 | Inf | unif   | wholeT_0.5  | DiP, DiP-A, OT, OT-A |
| 481 | No          | 11      | 11-B | 200    | Bozic | 0   | last   | singleC     | OT, OT-A             |
| 482 | No          | 11      | 11-B | 200    | Bozic | 0   | last   | wholeT_0.01 | OT, OT-A             |
| 483 | No          | 11      | 11-B | 200    | Bozic | 0   | last   | wholeT_0.5  | OT, OT-A             |
| 484 | No          | 11      | 11-B | 200    | Bozic | 0   | unif   | singleC     | OT, OT-A             |
| 485 | No          | 11      | 11-B | 200    | Bozic | 0   | unif   | wholeT_0.01 | DiP, DiP-A, OT, OT-A |
| 486 | No          | 11      | 11-B | 200    | Bozic | 0   | unif   | wholeT_0.5  | OT, OT-A             |
| 487 | No          | 11      | 11-B | 200    | Bozic | Inf | last   | singleC     | OT                   |
| 488 | No          | 11      | 11-B | 200    | Bozic | Inf | last   | wholeT_0.01 | OT, OT-A             |
| 489 | No          | 11      | 11-B | 200    | Bozic | Inf | last   | wholeT_0.5  | OT, OT-A             |
| 490 | No          | 11      | 11-B | 200    | Bozic | Inf | unif   | singleC     | OT, OT-A             |
| 491 | No          | 11      | 11-B | 200    | Bozic | Inf | unif   | wholeT_0.01 | OT, OT-A             |
| 492 | No          | 11      | 11-B | 200    | Bozic | Inf | unif   | wholeT_0.5  | OT, OT-A             |
| 493 | No          | 11      | 11-B | 200    | exp   | 0   | last   | singleC     | OT, OT-A             |
| 494 | No          | 11      | 11-B | 200    | exp   | 0   | last   | wholeT_0.01 | OT, OT-A             |
| 495 | No          | 11      | 11-B | 200    | exp   | 0   | last   | wholeT_0.5  | OT, OT-A             |
| 496 | No          | 11      | 11-B | 200    | exp   | 0   | unif   | singleC     | CBN, CBN-A           |
| 497 | No          | 11      | 11-B | 200    | exp   | 0   | unif   | wholeT_0.01 | OT, OT-A             |
| 498 | No          | 11      | 11-B | 200    | exp   | 0   | unif   | wholeT_0.5  | CBN-A                |
| 499 | No          | 11      | 11-B | 200    | exp   | Inf | last   | singleC     | OT, OT-A             |
| 500 | No          | 11      | 11-B | 200    | exp   | Inf | last   | wholeT_0.01 | OT, OT-A             |
| 501 | No          | 11      | 11-B | 200    | exp   | Inf | last   | wholeT_0.5  | OT, OT-A             |
| 502 | No          | 11      | 11-B | 200    | exp   | Inf | unif   | singleC     | OT, OT-A             |
| 503 | No          | 11      | 11-B | 200    | exp   | Inf | unif   | wholeT_0.01 | OT, OT-A             |
| 504 | No          | 11      | 11-B | 200    | exp   | Inf | unif   | wholeT_0.5  | OT, OT-A             |
| 505 | No          | 11      | 11-B | 200    | McF_4 | 0   | last   | singleC     | DiP, OT, OT-A        |
| 506 | No          | 11      | 11-B | 200    | McF_4 | 0   | last   | wholeT_0.01 | DiP, DiP-A, OT, OT-A |
| 507 | No          | 11      | 11-B | 200    | McF_4 | 0   | last   | wholeT_0.5  | DiP-A, OT, OT-A      |
| 508 | No          | 11      | 11-B | 200    | McF_4 | 0   | unif   | singleC     | DiP, DiP-A, OT, OT-A |
| 509 | No          | 11      | 11-B | 200    | McF_4 | 0   | unif   | wholeT_0.01 | DiP, DiP-A           |
| 510 | No          | 11      | 11-B | 200    | McF_4 | 0   | unif   | wholeT_0.5  | OT, OT-A             |
| 511 | No          | 11      | 11-B | 200    | McF_4 | Inf | last   | singleC     | OT, OT-A             |
| 512 | No          | 11      | 11-B | 200    | McF_4 | Inf | last   | wholeT_0.01 | DiP-A, OT, OT-A      |
| 513 | No          | 11      | 11-B | 200    | McF_4 | Inf | last   | wholeT_0.5  | OT, OT-A             |
| 514 | No          | 11      | 11-B | 200    | McF_4 | Inf | unif   | singleC     | OT, OT-A             |
| 515 | No          | 11      | 11-B | 200    | McF_4 | Inf | unif   | wholeT_0.01 | OT, OT-A             |
| 516 | No          | 11      | 11-B | 200    | McF_4 | Inf | unif   | wholeT_0.5  | OT, OT-A             |
| 517 | No          | 11      | 11-B | 200    | McF_6 | 0   | last   | singleC     | DiP, OT              |

Table 10: (continued)

|     | Conjunction | Drivers | Tree | S.Size | Model | sh  | S.Time | S.Type      | Best method(s)       |
|-----|-------------|---------|------|--------|-------|-----|--------|-------------|----------------------|
| 518 | No          | 11      | 11-B | 200    | McF_6 | 0   | last   | wholeT_0.01 | DiP, OT              |
| 519 | No          | 11      | 11-B | 200    | McF_6 | 0   | last   | wholeT_0.5  | DiP, OT              |
| 520 | No          | 11      | 11-B | 200    | McF_6 | 0   | unif   | singleC     | OT, OT-A             |
| 521 | No          | 11      | 11-B | 200    | McF_6 | 0   | unif   | wholeT_0.01 | DiP, DiP-A, OT, OT-A |
| 522 | No          | 11      | 11-B | 200    | McF_6 | 0   | unif   | wholeT_0.5  | OT, OT-A             |
| 523 | No          | 11      | 11-B | 200    | McF_6 | Inf | last   | singleC     | OT                   |
| 524 | No          | 11      | 11-B | 200    | McF_6 | Inf | last   | wholeT_0.01 | DiP, OT              |
| 525 | No          | 11      | 11-B | 200    | McF_6 | Inf | last   | wholeT_0.5  | OT                   |
| 526 | No          | 11      | 11-B | 200    | McF_6 | Inf | unif   | singleC     | OT, OT-A             |
| 527 | No          | 11      | 11-B | 200    | McF_6 | Inf | unif   | wholeT_0.01 | OT, OT-A             |
| 528 | No          | 11      | 11-B | 200    | McF_6 | Inf | unif   | wholeT_0.5  | OT, OT-A             |
| 529 | No          | 11      | 11-B | 100    | Bozic | 0   | last   | singleC     | OT, OT-A             |
| 530 | No          | 11      | 11-B | 100    | Bozic | 0   | last   | wholeT_0.01 | OT, OT-A             |
| 531 | No          | 11      | 11-B | 100    | Bozic | 0   | last   | wholeT_0.5  | OT, OT-A             |
| 532 | No          | 11      | 11-B | 100    | Bozic | 0   | unif   | singleC     | OT, OT-A             |
| 533 | No          | 11      | 11-B | 100    | Bozic | 0   | unif   | wholeT_0.01 | DiP, DiP-A, OT, OT-A |
| 534 | No          | 11      | 11-B | 100    | Bozic | 0   | unif   | wholeT_0.5  | OT, OT-A             |
| 535 | No          | 11      | 11-B | 100    | Bozic | Inf | last   | singleC     | OT, OT-A             |
| 536 | No          | 11      | 11-B | 100    | Bozic | Inf | last   | wholeT_0.01 | OT, OT-A             |
| 537 | No          | 11      | 11-B | 100    | Bozic | Inf | last   | wholeT_0.5  | OT, OT-A             |
| 538 | No          | 11      | 11-B | 100    | Bozic | Inf | unif   | singleC     | OT, OT-A             |
| 539 | No          | 11      | 11-B | 100    | Bozic | Inf | unif   | wholeT_0.01 | OT, OT-A             |
| 540 | No          | 11      | 11-B | 100    | Bozic | Inf | unif   | wholeT_0.5  | OT-A                 |
| 541 | No          | 11      | 11-B | 100    | exp   | 0   | last   | singleC     | OT, OT-A             |
| 542 | No          | 11      | 11-B | 100    | exp   | 0   | last   | wholeT_0.01 | OT-A                 |
| 543 | No          | 11      | 11-B | 100    | exp   | 0   | last   | wholeT_0.5  | OT, OT-A             |
| 544 | No          | 11      | 11-B | 100    | exp   | 0   | unif   | singleC     | CBN, CBN-A           |
| 545 | No          | 11      | 11-B | 100    | exp   | 0   | unif   | wholeT_0.01 | OT, OT-A             |
| 546 | No          | 11      | 11-B | 100    | exp   | 0   | unif   | wholeT_0.5  | CBN, CBN-A           |
| 547 | No          | 11      | 11-B | 100    | exp   | Inf | last   | singleC     | OT, OT-A             |
| 548 | No          | 11      | 11-B | 100    | exp   | Inf | last   | wholeT_0.01 | OT, OT-A             |
| 549 | No          | 11      | 11-B | 100    | exp   | Inf | last   | wholeT_0.5  | OT, OT-A             |
| 550 | No          | 11      | 11-B | 100    | exp   | Inf | unif   | singleC     | OT-A                 |
| 551 | No          | 11      | 11-B | 100    | exp   | Inf | unif   | wholeT_0.01 | OT, OT-A             |
| 552 | No          | 11      | 11-B | 100    | exp   | Inf | unif   | wholeT_0.5  | OT, OT-A             |
| 553 | No          | 11      | 11-B | 100    | McF_4 | 0   | last   | singleC     | OT, OT-A             |
| 554 | No          | 11      | 11-B | 100    | McF_4 | 0   | last   | wholeT_0.01 | DiP, DiP-A, OT, OT-A |
| 555 | No          | 11      | 11-B | 100    | McF_4 | 0   | last   | wholeT_0.5  | OT, OT-A             |
| 556 | No          | 11      | 11-B | 100    | McF_4 | 0   | unif   | singleC     | OT, OT-A             |
| 557 | No          | 11      | 11-B | 100    | McF_4 | 0   | unif   | wholeT_0.01 | DiP, DiP-A           |



Table 10: (continued)

|     | Conjunction | Drivers | Tree | S.Size | Model | sh  | S.Time | S.Type      | Best method(s)              |
|-----|-------------|---------|------|--------|-------|-----|--------|-------------|-----------------------------|
| 558 | No          | 11      | 11-B | 100    | McF_4 | 0   | unif   | wholeT_0.5  | OT, OT-A                    |
| 559 | No          | 11      | 11-B | 100    | McF_4 | Inf | last   | singleC     | OT, OT-A                    |
| 560 | No          | 11      | 11-B | 100    | McF_4 | Inf | last   | wholeT_0.01 | OT, OT-A                    |
| 561 | No          | 11      | 11-B | 100    | McF_4 | Inf | last   | wholeT_0.5  | OT, OT-A                    |
| 562 | No          | 11      | 11-B | 100    | McF_4 | Inf | unif   | singleC     | OT, OT-A                    |
| 563 | No          | 11      | 11-B | 100    | McF_4 | Inf | unif   | wholeT_0.01 | OT, OT-A                    |
| 564 | No          | 11      | 11-B | 100    | McF_4 | Inf | unif   | wholeT_0.5  | OT, OT-A                    |
| 565 | No          | 11      | 11-B | 100    | McF_6 | 0   | last   | singleC     | OT                          |
| 566 | No          | 11      | 11-B | 100    | McF_6 | 0   | last   | wholeT_0.01 | DiP, OT                     |
| 567 | No          | 11      | 11-B | 100    | McF_6 | 0   | last   | wholeT_0.5  | OT                          |
| 568 | No          | 11      | 11-B | 100    | McF_6 | 0   | unif   | singleC     | OT, OT-A                    |
| 569 | No          | 11      | 11-B | 100    | McF_6 | 0   | unif   | wholeT_0.01 | DiP, DiP-A, OT, OT-A        |
| 570 | No          | 11      | 11-B | 100    | McF_6 | 0   | unif   | wholeT_0.5  | OT, OT-A                    |
| 571 | No          | 11      | 11-B | 100    | McF_6 | Inf | last   | singleC     | OT                          |
| 572 | No          | 11      | 11-B | 100    | McF_6 | Inf | last   | wholeT_0.01 | OT                          |
| 573 | No          | 11      | 11-B | 100    | McF_6 | Inf | last   | wholeT_0.5  | OT                          |
| 574 | No          | 11      | 11-B | 100    | McF_6 | Inf | unif   | singleC     | OT, OT-A                    |
| 575 | No          | 11      | 11-B | 100    | McF_6 | Inf | unif   | wholeT_0.01 | OT, OT-A                    |
| 576 | No          | 11      | 11-B | 100    | McF_6 | Inf | unif   | wholeT_0.5  | OT, OT-A                    |
| 577 | No          | 9       | 9-B  | 1000   | Bozic | 0   | last   | singleC     | OT, OT-A                    |
| 578 | No          | 9       | 9-B  | 1000   | Bozic | 0   | last   | wholeT_0.01 | DiP, DiP-A, OT, OT-A        |
| 579 | No          | 9       | 9-B  | 1000   | Bozic | 0   | last   | wholeT_0.5  | OT, OT-A                    |
| 580 | No          | 9       | 9-B  | 1000   | Bozic | 0   | unif   | singleC     | OT, OT-A                    |
| 581 | No          | 9       | 9-B  | 1000   | Bozic | 0   | unif   | wholeT_0.01 | DiP, DiP-A, OT, OT-A        |
| 582 | No          | 9       | 9-B  | 1000   | Bozic | 0   | unif   | wholeT_0.5  | OT, OT-A                    |
| 583 | No          | 9       | 9-B  | 1000   | Bozic | Inf | last   | singleC     | OT, OT-A                    |
| 584 | No          | 9       | 9-B  | 1000   | Bozic | Inf | last   | wholeT_0.01 | DiP-A                       |
| 585 | No          | 9       | 9-B  | 1000   | Bozic | Inf | last   | wholeT_0.5  | OT, OT-A                    |
| 586 | No          | 9       | 9-B  | 1000   | Bozic | Inf | unif   | singleC     | DiP, DiP-A, OT, OT-A        |
| 587 | No          | 9       | 9-B  | 1000   | Bozic | Inf | unif   | wholeT_0.01 | OT, OT-A                    |
| 588 | No          | 9       | 9-B  | 1000   | Bozic | Inf | unif   | wholeT_0.5  | DiP-A, OT, OT-A             |
| 589 | No          | 9       | 9-B  | 1000   | exp   | 0   | last   | singleC     | OT, OT-A                    |
| 590 | No          | 9       | 9-B  | 1000   | exp   | 0   | last   | wholeT_0.01 | DiP-A, OT, OT-A             |
| 591 | No          | 9       | 9-B  | 1000   | exp   | 0   | last   | wholeT_0.5  | OT, OT-A                    |
| 592 | No          | 9       | 9-B  | 1000   | exp   | 0   | unif   | singleC     | OT, OT-A                    |
| 593 | No          | 9       | 9-B  | 1000   | exp   | 0   | unif   | wholeT_0.01 | DiP, DiP-A, OT, OT-A        |
| 594 | No          | 9       | 9-B  | 1000   | exp   | 0   | unif   | wholeT_0.5  | OT, OT-A                    |
| 595 | No          | 9       | 9-B  | 1000   | exp   | Inf | last   | singleC     | DiP, DiP-A, OT, OT-A        |
| 596 | No          | 9       | 9-B  | 1000   | exp   | Inf | last   | wholeT_0.01 | CBN-A, DiP, DiP-A, OT, OT-A |
| 597 | No          | 9       | 9-B  | 1000   | exp   | Inf | last   | wholeT_0.5  | DiP-A, OT, OT-A             |

Table 10: (continued)

|     | Conjunction | Drivers | Tree | S.Size | Model | sh  | S.Time | S.Type      | Best method(s)       |
|-----|-------------|---------|------|--------|-------|-----|--------|-------------|----------------------|
| 598 | No          | 9       | 9-B  | 1000   | exp   | Inf | unif   | singleC     | OT, OT-A             |
| 599 | No          | 9       | 9-B  | 1000   | exp   | Inf | unif   | wholeT_0.01 | OT, OT-A             |
| 600 | No          | 9       | 9-B  | 1000   | exp   | Inf | unif   | wholeT_0.5  | OT, OT-A             |
| 601 | No          | 9       | 9-B  | 1000   | McF_4 | 0   | last   | singleC     | OT, OT-A             |
| 602 | No          | 9       | 9-B  | 1000   | McF_4 | 0   | last   | wholeT_0.01 | DiP, DiP-A, OT, OT-A |
| 603 | No          | 9       | 9-B  | 1000   | McF_4 | 0   | last   | wholeT_0.5  | DiP-A, OT, OT-A      |
| 604 | No          | 9       | 9-B  | 1000   | McF_4 | 0   | unif   | singleC     | DiP, DiP-A, OT, OT-A |
| 605 | No          | 9       | 9-B  | 1000   | McF_4 | 0   | unif   | wholeT_0.01 | DiP, DiP-A, OT, OT-A |
| 606 | No          | 9       | 9-B  | 1000   | McF_4 | 0   | unif   | wholeT_0.5  | DiP, DiP-A, OT, OT-A |
| 607 | No          | 9       | 9-B  | 1000   | McF_4 | Inf | last   | singleC     | OT, OT-A             |
| 608 | No          | 9       | 9-B  | 1000   | McF_4 | Inf | last   | wholeT_0.01 | DiP, DiP-A, OT, OT-A |
| 609 | No          | 9       | 9-B  | 1000   | McF_4 | Inf | last   | wholeT_0.5  | DiP, OT, OT-A        |
| 610 | No          | 9       | 9-B  | 1000   | McF_4 | Inf | unif   | singleC     | DiP, DiP-A, OT, OT-A |
| 611 | No          | 9       | 9-B  | 1000   | McF_4 | Inf | unif   | wholeT_0.01 | DiP-A, OT, OT-A      |
| 612 | No          | 9       | 9-B  | 1000   | McF_4 | Inf | unif   | wholeT_0.5  | DiP, DiP-A, OT, OT-A |
| 613 | No          | 9       | 9-B  | 1000   | McF_6 | 0   | last   | singleC     | DiP, OT              |
| 614 | No          | 9       | 9-B  | 1000   | McF_6 | 0   | last   | wholeT_0.01 | DiP, OT              |
| 615 | No          | 9       | 9-B  | 1000   | McF_6 | 0   | last   | wholeT_0.5  | DiP, OT              |
| 616 | No          | 9       | 9-B  | 1000   | McF_6 | 0   | unif   | singleC     | DiP, DiP-A, OT, OT-A |
| 617 | No          | 9       | 9-B  | 1000   | McF_6 | 0   | unif   | wholeT_0.01 | DiP, DiP-A, OT, OT-A |
| 618 | No          | 9       | 9-B  | 1000   | McF_6 | 0   | unif   | wholeT_0.5  | DiP, DiP-A, OT, OT-A |
| 619 | No          | 9       | 9-B  | 1000   | McF_6 | Inf | last   | singleC     | DiP, OT              |
| 620 | No          | 9       | 9-B  | 1000   | McF_6 | Inf | last   | wholeT_0.01 | DiP, OT              |
| 621 | No          | 9       | 9-B  | 1000   | McF_6 | Inf | last   | wholeT_0.5  | DiP, OT              |
| 622 | No          | 9       | 9-B  | 1000   | McF_6 | Inf | unif   | singleC     | DiP, DiP-A, OT       |
| 623 | No          | 9       | 9-B  | 1000   | McF_6 | Inf | unif   | wholeT_0.01 | DiP, DiP-A, OT, OT-A |
| 624 | No          | 9       | 9-B  | 1000   | McF_6 | Inf | unif   | wholeT_0.5  | DiP, DiP-A, OT, OT-A |
| 625 | No          | 9       | 9-B  | 200    | Bozic | 0   | last   | singleC     | OT, OT-A             |
| 626 | No          | 9       | 9-B  | 200    | Bozic | 0   | last   | wholeT_0.01 | OT, OT-A             |
| 627 | No          | 9       | 9-B  | 200    | Bozic | 0   | last   | wholeT_0.5  | OT, OT-A             |
| 628 | No          | 9       | 9-B  | 200    | Bozic | 0   | unif   | singleC     | OT, OT-A             |
| 629 | No          | 9       | 9-B  | 200    | Bozic | 0   | unif   | wholeT_0.01 | DiP, DiP-A, OT, OT-A |
| 630 | No          | 9       | 9-B  | 200    | Bozic | 0   | unif   | wholeT_0.5  | CBN, CBN-A           |
| 631 | No          | 9       | 9-B  | 200    | Bozic | Inf | last   | singleC     | OT, OT-A             |
| 632 | No          | 9       | 9-B  | 200    | Bozic | Inf | last   | wholeT_0.01 | OT, OT-A             |
| 633 | No          | 9       | 9-B  | 200    | Bozic | Inf | last   | wholeT_0.5  | OT, OT-A             |
| 634 | No          | 9       | 9-B  | 200    | Bozic | Inf | unif   | singleC     | OT, OT-A             |
| 635 | No          | 9       | 9-B  | 200    | Bozic | Inf | unif   | wholeT_0.01 | OT, OT-A             |
| 636 | No          | 9       | 9-B  | 200    | Bozic | Inf | unif   | wholeT_0.5  | OT, OT-A             |
| 637 | No          | 9       | 9-B  | 200    | exp   | 0   | last   | singleC     | OT, OT-A             |

Table 10: (continued)

|     | Conjunction | Drivers | Tree | S.Size | Model | sh  | S.Time | S.Type      | Best method(s)       |
|-----|-------------|---------|------|--------|-------|-----|--------|-------------|----------------------|
| 638 | No          | 9       | 9-B  | 200    | exp   | 0   | last   | wholeT_0.01 | OT, OT-A             |
| 639 | No          | 9       | 9-B  | 200    | exp   | 0   | last   | wholeT_0.5  | OT, OT-A             |
| 640 | No          | 9       | 9-B  | 200    | exp   | 0   | unif   | singleC     | CBN, CBN-A           |
| 641 | No          | 9       | 9-B  | 200    | exp   | 0   | unif   | wholeT_0.01 | OT, OT-A             |
| 642 | No          | 9       | 9-B  | 200    | exp   | 0   | unif   | wholeT_0.5  | CBN, CBN-A           |
| 643 | No          | 9       | 9-B  | 200    | exp   | Inf | last   | singleC     | OT, OT-A             |
| 644 | No          | 9       | 9-B  | 200    | exp   | Inf | last   | wholeT_0.01 | OT, OT-A             |
| 645 | No          | 9       | 9-B  | 200    | exp   | Inf | last   | wholeT_0.5  | OT, OT-A             |
| 646 | No          | 9       | 9-B  | 200    | exp   | Inf | unif   | singleC     | OT, OT-A             |
| 647 | No          | 9       | 9-B  | 200    | exp   | Inf | unif   | wholeT_0.01 | OT, OT-A             |
| 648 | No          | 9       | 9-B  | 200    | exp   | Inf | unif   | wholeT_0.5  | OT, OT-A             |
| 649 | No          | 9       | 9-B  | 200    | McF_4 | 0   | last   | singleC     | OT, OT-A             |
| 650 | No          | 9       | 9-B  | 200    | McF_4 | 0   | last   | wholeT_0.01 | DiP, DiP-A, OT, OT-A |
| 651 | No          | 9       | 9-B  | 200    | McF_4 | 0   | last   | wholeT_0.5  | DiP-A, OT, OT-A      |
| 652 | No          | 9       | 9-B  | 200    | McF_4 | 0   | unif   | singleC     | OT, OT-A             |
| 653 | No          | 9       | 9-B  | 200    | McF_4 | 0   | unif   | wholeT_0.01 | DiP, DiP-A, OT, OT-A |
| 654 | No          | 9       | 9-B  | 200    | McF_4 | 0   | unif   | wholeT_0.5  | OT, OT-A             |
| 655 | No          | 9       | 9-B  | 200    | McF_4 | Inf | last   | singleC     | OT, OT-A             |
| 656 | No          | 9       | 9-B  | 200    | McF_4 | Inf | last   | wholeT_0.01 | OT, OT-A             |
| 657 | No          | 9       | 9-B  | 200    | McF_4 | Inf | last   | wholeT_0.5  | DiP-A, OT, OT-A      |
| 658 | No          | 9       | 9-B  | 200    | McF_4 | Inf | unif   | singleC     | OT, OT-A             |
| 659 | No          | 9       | 9-B  | 200    | McF_4 | Inf | unif   | wholeT_0.01 | OT, OT-A             |
| 660 | No          | 9       | 9-B  | 200    | McF_4 | Inf | unif   | wholeT_0.5  | OT, OT-A             |
| 661 | No          | 9       | 9-B  | 200    | McF_6 | 0   | last   | singleC     | DiP, OT              |
| 662 | No          | 9       | 9-B  | 200    | McF_6 | 0   | last   | wholeT_0.01 | DiP, OT              |
| 663 | No          | 9       | 9-B  | 200    | McF_6 | 0   | last   | wholeT_0.5  | DiP, OT              |
| 664 | No          | 9       | 9-B  | 200    | McF_6 | 0   | unif   | singleC     | DiP, DiP-A, OT, OT-A |
| 665 | No          | 9       | 9-B  | 200    | McF_6 | 0   | unif   | wholeT_0.01 | DiP, OT              |
| 666 | No          | 9       | 9-B  | 200    | McF_6 | 0   | unif   | wholeT_0.5  | DiP, OT, OT-A        |
| 667 | No          | 9       | 9-B  | 200    | McF_6 | Inf | last   | singleC     | DiP, OT              |
| 668 | No          | 9       | 9-B  | 200    | McF_6 | Inf | last   | wholeT_0.01 | DiP, OT              |
| 669 | No          | 9       | 9-B  | 200    | McF_6 | Inf | last   | wholeT_0.5  | DiP, OT              |
| 670 | No          | 9       | 9-B  | 200    | McF_6 | Inf | unif   | singleC     | OT, OT-A             |
| 671 | No          | 9       | 9-B  | 200    | McF_6 | Inf | unif   | wholeT_0.01 | OT, OT-A             |
| 672 | No          | 9       | 9-B  | 200    | McF_6 | Inf | unif   | wholeT_0.5  | OT, OT-A             |
| 673 | No          | 9       | 9-B  | 100    | Bozic | 0   | last   | singleC     | OT, OT-A             |
| 674 | No          | 9       | 9-B  | 100    | Bozic | 0   | last   | wholeT_0.01 | OT, OT-A             |
| 675 | No          | 9       | 9-B  | 100    | Bozic | 0   | last   | wholeT_0.5  | OT, OT-A             |
| 676 | No          | 9       | 9-B  | 100    | Bozic | 0   | unif   | singleC     | CBN, CBN-A           |
| 677 | No          | 9       | 9-B  | 100    | Bozic | 0   | unif   | wholeT_0.01 | OT, OT-A             |

Table 10: (continued)

|     | Conjunction | Drivers | Tree | S.Size | Model | sh  | S.Time | S.Type      | Best method(s)       |
|-----|-------------|---------|------|--------|-------|-----|--------|-------------|----------------------|
| 678 | No          | 9       | 9-B  | 100    | Bozic | 0   | unif   | wholeT_0.5  | CBN, CBN-A           |
| 679 | No          | 9       | 9-B  | 100    | Bozic | Inf | last   | singleC     | OT, OT-A             |
| 680 | No          | 9       | 9-B  | 100    | Bozic | Inf | last   | wholeT_0.01 | OT, OT-A             |
| 681 | No          | 9       | 9-B  | 100    | Bozic | Inf | last   | wholeT_0.5  | OT, OT-A             |
| 682 | No          | 9       | 9-B  | 100    | Bozic | Inf | unif   | singleC     | OT, OT-A             |
| 683 | No          | 9       | 9-B  | 100    | Bozic | Inf | unif   | wholeT_0.01 | OT, OT-A             |
| 684 | No          | 9       | 9-B  | 100    | Bozic | Inf | unif   | wholeT_0.5  | OT, OT-A             |
| 685 | No          | 9       | 9-B  | 100    | exp   | 0   | last   | singleC     | OT, OT-A             |
| 686 | No          | 9       | 9-B  | 100    | exp   | 0   | last   | wholeT_0.01 | OT, OT-A             |
| 687 | No          | 9       | 9-B  | 100    | exp   | 0   | last   | wholeT_0.5  | OT, OT-A             |
| 688 | No          | 9       | 9-B  | 100    | exp   | 0   | unif   | singleC     | CBN, CBN-A           |
| 689 | No          | 9       | 9-B  | 100    | exp   | 0   | unif   | wholeT_0.01 | OT, OT-A             |
| 690 | No          | 9       | 9-B  | 100    | exp   | 0   | unif   | wholeT_0.5  | CBN, CBN-A           |
| 691 | No          | 9       | 9-B  | 100    | exp   | Inf | last   | singleC     | OT, OT-A             |
| 692 | No          | 9       | 9-B  | 100    | exp   | Inf | last   | wholeT_0.01 | OT, OT-A             |
| 693 | No          | 9       | 9-B  | 100    | exp   | Inf | last   | wholeT_0.5  | OT, OT-A             |
| 694 | No          | 9       | 9-B  | 100    | exp   | Inf | unif   | singleC     | OT, OT-A             |
| 695 | No          | 9       | 9-B  | 100    | exp   | Inf | unif   | wholeT_0.01 | OT, OT-A             |
| 696 | No          | 9       | 9-B  | 100    | exp   | Inf | unif   | wholeT_0.5  | OT, OT-A             |
| 697 | No          | 9       | 9-B  | 100    | McF_4 | 0   | last   | singleC     | OT, OT-A             |
| 698 | No          | 9       | 9-B  | 100    | McF_4 | 0   | last   | wholeT_0.01 | DiP, DiP-A, OT, OT-A |
| 699 | No          | 9       | 9-B  | 100    | McF_4 | 0   | last   | wholeT_0.5  | OT, OT-A             |
| 700 | No          | 9       | 9-B  | 100    | McF_4 | 0   | unif   | singleC     | OT, OT-A             |
| 701 | No          | 9       | 9-B  | 100    | McF_4 | 0   | unif   | wholeT_0.01 | DiP, DiP-A, OT, OT-A |
| 702 | No          | 9       | 9-B  | 100    | McF_4 | 0   | unif   | wholeT_0.5  | OT, OT-A             |
| 703 | No          | 9       | 9-B  | 100    | McF_4 | Inf | last   | singleC     | OT, OT-A             |
| 704 | No          | 9       | 9-B  | 100    | McF_4 | Inf | last   | wholeT_0.01 | OT, OT-A             |
| 705 | No          | 9       | 9-B  | 100    | McF_4 | Inf | last   | wholeT_0.5  | OT, OT-A             |
| 706 | No          | 9       | 9-B  | 100    | McF_4 | Inf | unif   | singleC     | OT, OT-A             |
| 707 | No          | 9       | 9-B  | 100    | McF_4 | Inf | unif   | wholeT_0.01 | OT, OT-A             |
| 708 | No          | 9       | 9-B  | 100    | McF_4 | Inf | unif   | wholeT_0.5  | OT, OT-A             |
| 709 | No          | 9       | 9-B  | 100    | McF_6 | 0   | last   | singleC     | OT                   |
| 710 | No          | 9       | 9-B  | 100    | McF_6 | 0   | last   | wholeT_0.01 | OT                   |
| 711 | No          | 9       | 9-B  | 100    | McF_6 | 0   | last   | wholeT_0.5  | OT                   |
| 712 | No          | 9       | 9-B  | 100    | McF_6 | 0   | unif   | singleC     | OT, OT-A             |
| 713 | No          | 9       | 9-B  | 100    | McF_6 | 0   | unif   | wholeT_0.01 | DiP, DiP-A, OT, OT-A |
| 714 | No          | 9       | 9-B  | 100    | McF_6 | 0   | unif   | wholeT_0.5  | OT, OT-A             |
| 715 | No          | 9       | 9-B  | 100    | McF_6 | Inf | last   | singleC     | OT                   |
| 716 | No          | 9       | 9-B  | 100    | McF_6 | Inf | last   | wholeT_0.01 | OT                   |
| 717 | No          | 9       | 9-B  | 100    | McF_6 | Inf | last   | wholeT_0.5  | OT                   |

Table 10: (continued)

|     | Conjunction | Drivers | Tree | S.Size | Model | sh  | S.Time | S.Type      | Best method(s)              |
|-----|-------------|---------|------|--------|-------|-----|--------|-------------|-----------------------------|
| 718 | No          | 9       | 9-B  | 100    | McF_6 | Inf | unif   | singleC     | OT, OT-A                    |
| 719 | No          | 9       | 9-B  | 100    | McF_6 | Inf | unif   | wholeT_0.01 | OT, OT-A                    |
| 720 | No          | 9       | 9-B  | 100    | McF_6 | Inf | unif   | wholeT_0.5  | OT, OT-A                    |
| 721 | No          | 7       | 7-B  | 1000   | Bozic | 0   | last   | singleC     | DiP-A, OT, OT-A             |
| 722 | No          | 7       | 7-B  | 1000   | Bozic | 0   | last   | wholeT_0.01 | DiP-A, OT, OT-A             |
| 723 | No          | 7       | 7-B  | 1000   | Bozic | 0   | last   | wholeT_0.5  | OT, OT-A                    |
| 724 | No          | 7       | 7-B  | 1000   | Bozic | 0   | unif   | singleC     | DiP, DiP-A, OT, OT-A        |
| 725 | No          | 7       | 7-B  | 1000   | Bozic | 0   | unif   | wholeT_0.01 | CBN-A, DiP, DiP-A, OT, OT-A |
| 726 | No          | 7       | 7-B  | 1000   | Bozic | 0   | unif   | wholeT_0.5  | OT, OT-A                    |
| 727 | No          | 7       | 7-B  | 1000   | Bozic | Inf | last   | singleC     | DiP-A, OT, OT-A             |
| 728 | No          | 7       | 7-B  | 1000   | Bozic | Inf | last   | wholeT_0.01 | none                        |
| 729 | No          | 7       | 7-B  | 1000   | Bozic | Inf | last   | wholeT_0.5  | DiP-A, OT, OT-A             |
| 730 | No          | 7       | 7-B  | 1000   | Bozic | Inf | unif   | singleC     | CBN, CBN-A                  |
| 731 | No          | 7       | 7-B  | 1000   | Bozic | Inf | unif   | wholeT_0.01 | CBN, CBN-A, OT, OT-A        |
| 732 | No          | 7       | 7-B  | 1000   | Bozic | Inf | unif   | wholeT_0.5  | CBN, CBN-A                  |
| 733 | No          | 7       | 7-B  | 1000   | exp   | 0   | last   | singleC     | OT-A                        |
| 734 | No          | 7       | 7-B  | 1000   | exp   | 0   | last   | wholeT_0.01 | OT-A                        |
| 735 | No          | 7       | 7-B  | 1000   | exp   | 0   | last   | wholeT_0.5  | OT-A                        |
| 736 | No          | 7       | 7-B  | 1000   | exp   | 0   | unif   | singleC     | OT, OT-A                    |
| 737 | No          | 7       | 7-B  | 1000   | exp   | 0   | unif   | wholeT_0.01 | CBN, CBN-A, OT, OT-A        |
| 738 | No          | 7       | 7-B  | 1000   | exp   | 0   | unif   | wholeT_0.5  | OT, OT-A                    |
| 739 | No          | 7       | 7-B  | 1000   | exp   | Inf | last   | singleC     | OT, OT-A                    |
| 740 | No          | 7       | 7-B  | 1000   | exp   | Inf | last   | wholeT_0.01 | CBN-A, OT, OT-A             |
| 741 | No          | 7       | 7-B  | 1000   | exp   | Inf | last   | wholeT_0.5  | OT, OT-A                    |
| 742 | No          | 7       | 7-B  | 1000   | exp   | Inf | unif   | singleC     | OT                          |
| 743 | No          | 7       | 7-B  | 1000   | exp   | Inf | unif   | wholeT_0.01 | CBN-A, OT, OT-A             |
| 744 | No          | 7       | 7-B  | 1000   | exp   | Inf | unif   | wholeT_0.5  | OT, OT-A                    |
| 745 | No          | 7       | 7-B  | 1000   | McF_4 | 0   | last   | singleC     | DiP, DiP-A, OT, OT-A        |
| 746 | No          | 7       | 7-B  | 1000   | McF_4 | 0   | last   | wholeT_0.01 | DiP, DiP-A, OT, OT-A        |
| 747 | No          | 7       | 7-B  | 1000   | McF_4 | 0   | last   | wholeT_0.5  | DiP, DiP-A, OT, OT-A        |
| 748 | No          | 7       | 7-B  | 1000   | McF_4 | 0   | unif   | singleC     | DiP, DiP-A, OT, OT-A        |
| 749 | No          | 7       | 7-B  | 1000   | McF_4 | 0   | unif   | wholeT_0.01 | DiP, DiP-A, OT, OT-A        |
| 750 | No          | 7       | 7-B  | 1000   | McF_4 | 0   | unif   | wholeT_0.5  | DiP, DiP-A, OT, OT-A        |
| 751 | No          | 7       | 7-B  | 1000   | McF_4 | Inf | last   | singleC     | DiP, DiP-A, OT, OT-A        |
| 752 | No          | 7       | 7-B  | 1000   | McF_4 | Inf | last   | wholeT_0.01 | DiP, DiP-A, OT, OT-A        |
| 753 | No          | 7       | 7-B  | 1000   | McF_4 | Inf | last   | wholeT_0.5  | DiP, DiP-A, OT, OT-A        |
| 754 | No          | 7       | 7-B  | 1000   | McF_4 | Inf | unif   | singleC     | DiP-A, OT, OT-A             |
| 755 | No          | 7       | 7-B  | 1000   | McF_4 | Inf | unif   | wholeT_0.01 | DiP, DiP-A, OT, OT-A        |
| 756 | No          | 7       | 7-B  | 1000   | McF_4 | Inf | unif   | wholeT_0.5  | DiP, DiP-A, OT, OT-A        |
| 757 | No          | 7       | 7-B  | 1000   | McF_6 | 0   | last   | singleC     | DiP, DiP-A, OT, OT-A        |

Table 10: (continued)

|     | Conjunction | Drivers | Tree | S.Size | Model | sh  | S.Time | S.Type      | Best method(s)             |
|-----|-------------|---------|------|--------|-------|-----|--------|-------------|----------------------------|
| 758 | No          | 7       | 7-B  | 1000   | McF_6 | 0   | last   | wholeT_0.01 | DiP, DiP-A, OT, OT-A       |
| 759 | No          | 7       | 7-B  | 1000   | McF_6 | 0   | last   | wholeT_0.5  | DiP, DiP-A, OT, OT-A       |
| 760 | No          | 7       | 7-B  | 1000   | McF_6 | 0   | unif   | singleC     | none                       |
| 761 | No          | 7       | 7-B  | 1000   | McF_6 | 0   | unif   | wholeT_0.01 | none                       |
| 762 | No          | 7       | 7-B  | 1000   | McF_6 | 0   | unif   | wholeT_0.5  | CBN, DiP, DiP-A, OT-A      |
| 763 | No          | 7       | 7-B  | 1000   | McF_6 | Inf | last   | singleC     | DiP, DiP-A, OT, OT-A       |
| 764 | No          | 7       | 7-B  | 1000   | McF_6 | Inf | last   | wholeT_0.01 | DiP-A, OT, OT-A            |
| 765 | No          | 7       | 7-B  | 1000   | McF_6 | Inf | last   | wholeT_0.5  | DiP, DiP-A, OT, OT-A       |
| 766 | No          | 7       | 7-B  | 1000   | McF_6 | Inf | unif   | singleC     | CBN, CBN-A, DiP, DiP-A, OT |
| 767 | No          | 7       | 7-B  | 1000   | McF_6 | Inf | unif   | wholeT_0.01 | none                       |
| 768 | No          | 7       | 7-B  | 1000   | McF_6 | Inf | unif   | wholeT_0.5  | none                       |
| 769 | No          | 7       | 7-B  | 200    | Bozic | 0   | last   | singleC     | OT-A                       |
| 770 | No          | 7       | 7-B  | 200    | Bozic | 0   | last   | wholeT_0.01 | OT-A                       |
| 771 | No          | 7       | 7-B  | 200    | Bozic | 0   | last   | wholeT_0.5  | OT-A                       |
| 772 | No          | 7       | 7-B  | 200    | Bozic | 0   | unif   | singleC     | OT, OT-A                   |
| 773 | No          | 7       | 7-B  | 200    | Bozic | 0   | unif   | wholeT_0.01 | CBN, CBN-A, OT, OT-A       |
| 774 | No          | 7       | 7-B  | 200    | Bozic | 0   | unif   | wholeT_0.5  | OT, OT-A                   |
| 775 | No          | 7       | 7-B  | 200    | Bozic | Inf | last   | singleC     | OT, OT-A                   |
| 776 | No          | 7       | 7-B  | 200    | Bozic | Inf | last   | wholeT_0.01 | CBN, CBN-A, OT-A           |
| 777 | No          | 7       | 7-B  | 200    | Bozic | Inf | last   | wholeT_0.5  | OT, OT-A                   |
| 778 | No          | 7       | 7-B  | 200    | Bozic | Inf | unif   | singleC     | CBN, CBN-A, OT, OT-A       |
| 779 | No          | 7       | 7-B  | 200    | Bozic | Inf | unif   | wholeT_0.01 | CBN, CBN-A, OT, OT-A       |
| 780 | No          | 7       | 7-B  | 200    | Bozic | Inf | unif   | wholeT_0.5  | CBN, CBN-A, OT, OT-A       |
| 781 | No          | 7       | 7-B  | 200    | exp   | 0   | last   | singleC     | OT-A                       |
| 782 | No          | 7       | 7-B  | 200    | exp   | 0   | last   | wholeT_0.01 | OT-A                       |
| 783 | No          | 7       | 7-B  | 200    | exp   | 0   | last   | wholeT_0.5  | OT-A                       |
| 784 | No          | 7       | 7-B  | 200    | exp   | 0   | unif   | singleC     | OT, OT-A                   |
| 785 | No          | 7       | 7-B  | 200    | exp   | 0   | unif   | wholeT_0.01 | OT, OT-A                   |
| 786 | No          | 7       | 7-B  | 200    | exp   | 0   | unif   | wholeT_0.5  | OT, OT-A                   |
| 787 | No          | 7       | 7-B  | 200    | exp   | Inf | last   | singleC     | OT, OT-A                   |
| 788 | No          | 7       | 7-B  | 200    | exp   | Inf | last   | wholeT_0.01 | CBN-A, OT-A                |
| 789 | No          | 7       | 7-B  | 200    | exp   | Inf | last   | wholeT_0.5  | OT, OT-A                   |
| 790 | No          | 7       | 7-B  | 200    | exp   | Inf | unif   | singleC     | OT, OT-A                   |
| 791 | No          | 7       | 7-B  | 200    | exp   | Inf | unif   | wholeT_0.01 | CBN, CBN-A, OT, OT-A       |
| 792 | No          | 7       | 7-B  | 200    | exp   | Inf | unif   | wholeT_0.5  | OT, OT-A                   |
| 793 | No          | 7       | 7-B  | 200    | McF_4 | 0   | last   | singleC     | OT, OT-A                   |
| 794 | No          | 7       | 7-B  | 200    | McF_4 | 0   | last   | wholeT_0.01 | DiP, DiP-A, OT, OT-A       |
| 795 | No          | 7       | 7-B  | 200    | McF_4 | 0   | last   | wholeT_0.5  | OT, OT-A                   |
| 796 | No          | 7       | 7-B  | 200    | McF_4 | 0   | unif   | singleC     | DiP-A, OT, OT-A            |
| 797 | No          | 7       | 7-B  | 200    | McF_4 | 0   | unif   | wholeT_0.01 | DiP, DiP-A, OT, OT-A       |

Table 10: (continued)

|     | Conjunction | Drivers | Tree | S.Size | Model | sh  | S.Time | S.Type      | Best method(s)            |
|-----|-------------|---------|------|--------|-------|-----|--------|-------------|---------------------------|
| 798 | No          | 7       | 7-B  | 200    | McF_4 | 0   | unif   | wholeT_0.5  | OT, OT-A                  |
| 799 | No          | 7       | 7-B  | 200    | McF_4 | Inf | last   | singleC     | OT, OT-A                  |
| 800 | No          | 7       | 7-B  | 200    | McF_4 | Inf | last   | wholeT_0.01 | OT, OT-A                  |
| 801 | No          | 7       | 7-B  | 200    | McF_4 | Inf | last   | wholeT_0.5  | OT, OT-A                  |
| 802 | No          | 7       | 7-B  | 200    | McF_4 | Inf | unif   | singleC     | OT, OT-A                  |
| 803 | No          | 7       | 7-B  | 200    | McF_4 | Inf | unif   | wholeT_0.01 | OT, OT-A                  |
| 804 | No          | 7       | 7-B  | 200    | McF_4 | Inf | unif   | wholeT_0.5  | OT, OT-A                  |
| 805 | No          | 7       | 7-B  | 200    | McF_6 | 0   | last   | singleC     | DiP-A, OT, OT-A           |
| 806 | No          | 7       | 7-B  | 200    | McF_6 | 0   | last   | wholeT_0.01 | DiP, DiP-A, OT, OT-A      |
| 807 | No          | 7       | 7-B  | 200    | McF_6 | 0   | last   | wholeT_0.5  | DiP-A, OT, OT-A           |
| 808 | No          | 7       | 7-B  | 200    | McF_6 | 0   | unif   | singleC     | none                      |
| 809 | No          | 7       | 7-B  | 200    | McF_6 | 0   | unif   | wholeT_0.01 | CBN-A, DiP, DiP-A, OT-A   |
| 810 | No          | 7       | 7-B  | 200    | McF_6 | 0   | unif   | wholeT_0.5  | CBN, CBN-A, DiP, OT, OT-A |
| 811 | No          | 7       | 7-B  | 200    | McF_6 | Inf | last   | singleC     | DiP-A, OT-A               |
| 812 | No          | 7       | 7-B  | 200    | McF_6 | Inf | last   | wholeT_0.01 | OT, OT-A                  |
| 813 | No          | 7       | 7-B  | 200    | McF_6 | Inf | last   | wholeT_0.5  | DiP-A, OT, OT-A           |
| 814 | No          | 7       | 7-B  | 200    | McF_6 | Inf | unif   | singleC     | CBN, CBN-A, OT-A          |
| 815 | No          | 7       | 7-B  | 200    | McF_6 | Inf | unif   | wholeT_0.01 | CBN, CBN-A, OT-A          |
| 816 | No          | 7       | 7-B  | 200    | McF_6 | Inf | unif   | wholeT_0.5  | none                      |
| 817 | No          | 7       | 7-B  | 100    | Bozic | 0   | last   | singleC     | OT-A                      |
| 818 | No          | 7       | 7-B  | 100    | Bozic | 0   | last   | wholeT_0.01 | OT-A                      |
| 819 | No          | 7       | 7-B  | 100    | Bozic | 0   | last   | wholeT_0.5  | OT-A                      |
| 820 | No          | 7       | 7-B  | 100    | Bozic | 0   | unif   | singleC     | OT, OT-A                  |
| 821 | No          | 7       | 7-B  | 100    | Bozic | 0   | unif   | wholeT_0.01 | CBN-A, OT, OT-A           |
| 822 | No          | 7       | 7-B  | 100    | Bozic | 0   | unif   | wholeT_0.5  | OT, OT-A                  |
| 823 | No          | 7       | 7-B  | 100    | Bozic | Inf | last   | singleC     | OT, OT-A                  |
| 824 | No          | 7       | 7-B  | 100    | Bozic | Inf | last   | wholeT_0.01 | CBN-A, OT-A               |
| 825 | No          | 7       | 7-B  | 100    | Bozic | Inf | last   | wholeT_0.5  | OT, OT-A                  |
| 826 | No          | 7       | 7-B  | 100    | Bozic | Inf | unif   | singleC     | OT, OT-A                  |
| 827 | No          | 7       | 7-B  | 100    | Bozic | Inf | unif   | wholeT_0.01 | CBN-A, OT, OT-A           |
| 828 | No          | 7       | 7-B  | 100    | Bozic | Inf | unif   | wholeT_0.5  | CBN-A, OT, OT-A           |
| 829 | No          | 7       | 7-B  | 100    | exp   | 0   | last   | singleC     | OT-A                      |
| 830 | No          | 7       | 7-B  | 100    | exp   | 0   | last   | wholeT_0.01 | OT-A                      |
| 831 | No          | 7       | 7-B  | 100    | exp   | 0   | last   | wholeT_0.5  | OT-A                      |
| 832 | No          | 7       | 7-B  | 100    | exp   | 0   | unif   | singleC     | OT, OT-A                  |
| 833 | No          | 7       | 7-B  | 100    | exp   | 0   | unif   | wholeT_0.01 | OT, OT-A                  |
| 834 | No          | 7       | 7-B  | 100    | exp   | 0   | unif   | wholeT_0.5  | CBN, CBN-A                |
| 835 | No          | 7       | 7-B  | 100    | exp   | Inf | last   | singleC     | OT, OT-A                  |
| 836 | No          | 7       | 7-B  | 100    | exp   | Inf | last   | wholeT_0.01 | OT-A                      |
| 837 | No          | 7       | 7-B  | 100    | exp   | Inf | last   | wholeT_0.5  | OT-A                      |

Table 10: (continued)

|     | Conjunction | Drivers | Tree | S.Size | Model | sh  | S.Time | S.Type      | Best method(s)         |
|-----|-------------|---------|------|--------|-------|-----|--------|-------------|------------------------|
| 838 | No          | 7       | 7-B  | 100    | exp   | Inf | unif   | singleC     | OT, OT-A               |
| 839 | No          | 7       | 7-B  | 100    | exp   | Inf | unif   | wholeT_0.01 | CBN, CBN-A, OT, OT-A   |
| 840 | No          | 7       | 7-B  | 100    | exp   | Inf | unif   | wholeT_0.5  | OT, OT-A               |
| 841 | No          | 7       | 7-B  | 100    | McF_4 | 0   | last   | singleC     | OT, OT-A               |
| 842 | No          | 7       | 7-B  | 100    | McF_4 | 0   | last   | wholeT_0.01 | OT, OT-A               |
| 843 | No          | 7       | 7-B  | 100    | McF_4 | 0   | last   | wholeT_0.5  | OT, OT-A               |
| 844 | No          | 7       | 7-B  | 100    | McF_4 | 0   | unif   | singleC     | OT, OT-A               |
| 845 | No          | 7       | 7-B  | 100    | McF_4 | 0   | unif   | wholeT_0.01 | OT, OT-A               |
| 846 | No          | 7       | 7-B  | 100    | McF_4 | 0   | unif   | wholeT_0.5  | OT                     |
| 847 | No          | 7       | 7-B  | 100    | McF_4 | Inf | last   | singleC     | OT, OT-A               |
| 848 | No          | 7       | 7-B  | 100    | McF_4 | Inf | last   | wholeT_0.01 | OT, OT-A               |
| 849 | No          | 7       | 7-B  | 100    | McF_4 | Inf | last   | wholeT_0.5  | OT, OT-A               |
| 850 | No          | 7       | 7-B  | 100    | McF_4 | Inf | unif   | singleC     | OT, OT-A               |
| 851 | No          | 7       | 7-B  | 100    | McF_4 | Inf | unif   | wholeT_0.01 | OT, OT-A               |
| 852 | No          | 7       | 7-B  | 100    | McF_4 | Inf | unif   | wholeT_0.5  | OT, OT-A               |
| 853 | No          | 7       | 7-B  | 100    | McF_6 | 0   | last   | singleC     | OT, OT-A               |
| 854 | No          | 7       | 7-B  | 100    | McF_6 | 0   | last   | wholeT_0.01 | OT, OT-A               |
| 855 | No          | 7       | 7-B  | 100    | McF_6 | 0   | last   | wholeT_0.5  | OT, OT-A               |
| 856 | No          | 7       | 7-B  | 100    | McF_6 | 0   | unif   | singleC     | CBN, CBN-A, OT, OT-A   |
| 857 | No          | 7       | 7-B  | 100    | McF_6 | 0   | unif   | wholeT_0.01 | CBN, CBN-A, DiP, DiP-A |
| 858 | No          | 7       | 7-B  | 100    | McF_6 | 0   | unif   | wholeT_0.5  | CBN, CBN-A, OT, OT-A   |
| 859 | No          | 7       | 7-B  | 100    | McF_6 | Inf | last   | singleC     | OT, OT-A               |
| 860 | No          | 7       | 7-B  | 100    | McF_6 | Inf | last   | wholeT_0.01 | OT, OT-A               |
| 861 | No          | 7       | 7-B  | 100    | McF_6 | Inf | last   | wholeT_0.5  | OT, OT-A               |
| 862 | No          | 7       | 7-B  | 100    | McF_6 | Inf | unif   | singleC     | CBN, CBN-A             |
| 863 | No          | 7       | 7-B  | 100    | McF_6 | Inf | unif   | wholeT_0.01 | CBN, CBN-A             |
| 864 | No          | 7       | 7-B  | 100    | McF_6 | Inf | unif   | wholeT_0.5  | CBN, CBN-A             |



### 4.3 Confidence sets (MCB), PND, Drivers Known

Table 11: Confidence sets (method MCB) when Drivers are Known for measure PND.

|    | Conjunction | Drivers | Tree | S.Size | Model | sh  | S.Time | S.Type      | Best method(s)              |
|----|-------------|---------|------|--------|-------|-----|--------|-------------|-----------------------------|
| 1  | Yes         | 11      | 11-A | 1000   | Bozic | 0   | last   | singleC     | CBN, CBN-A                  |
| 2  | Yes         | 11      | 11-A | 1000   | Bozic | 0   | last   | wholeT_0.01 | CBN, CBN-A, OT, OT-A        |
| 3  | Yes         | 11      | 11-A | 1000   | Bozic | 0   | last   | wholeT_0.5  | CBN, CBN-A, OT, OT-A        |
| 4  | Yes         | 11      | 11-A | 1000   | Bozic | 0   | unif   | singleC     | CBN, CBN-A                  |
| 5  | Yes         | 11      | 11-A | 1000   | Bozic | 0   | unif   | wholeT_0.01 | CBN, CBN-A                  |
| 6  | Yes         | 11      | 11-A | 1000   | Bozic | 0   | unif   | wholeT_0.5  | CBN, CBN-A                  |
| 7  | Yes         | 11      | 11-A | 1000   | Bozic | Inf | last   | singleC     | CBN, CBN-A                  |
| 8  | Yes         | 11      | 11-A | 1000   | Bozic | Inf | last   | wholeT_0.01 | CBN, CBN-A                  |
| 9  | Yes         | 11      | 11-A | 1000   | Bozic | Inf | last   | wholeT_0.5  | CBN, CBN-A                  |
| 10 | Yes         | 11      | 11-A | 1000   | Bozic | Inf | unif   | singleC     | CBN, CBN-A                  |
| 11 | Yes         | 11      | 11-A | 1000   | Bozic | Inf | unif   | wholeT_0.01 | CBN, CBN-A                  |
| 12 | Yes         | 11      | 11-A | 1000   | Bozic | Inf | unif   | wholeT_0.5  | CBN, CBN-A                  |
| 13 | Yes         | 11      | 11-A | 1000   | exp   | 0   | last   | singleC     | CBN, CBN-A                  |
| 14 | Yes         | 11      | 11-A | 1000   | exp   | 0   | last   | wholeT_0.01 | CBN, CBN-A                  |
| 15 | Yes         | 11      | 11-A | 1000   | exp   | 0   | last   | wholeT_0.5  | CBN, CBN-A                  |
| 16 | Yes         | 11      | 11-A | 1000   | exp   | 0   | unif   | singleC     | CBN, CBN-A                  |
| 17 | Yes         | 11      | 11-A | 1000   | exp   | 0   | unif   | wholeT_0.01 | CBN, CBN-A                  |
| 18 | Yes         | 11      | 11-A | 1000   | exp   | 0   | unif   | wholeT_0.5  | CBN, CBN-A                  |
| 19 | Yes         | 11      | 11-A | 1000   | exp   | Inf | last   | singleC     | CBN, CBN-A                  |
| 20 | Yes         | 11      | 11-A | 1000   | exp   | Inf | last   | wholeT_0.01 | CBN, CBN-A                  |
| 21 | Yes         | 11      | 11-A | 1000   | exp   | Inf | last   | wholeT_0.5  | CBN, CBN-A                  |
| 22 | Yes         | 11      | 11-A | 1000   | exp   | Inf | unif   | singleC     | CBN, CBN-A                  |
| 23 | Yes         | 11      | 11-A | 1000   | exp   | Inf | unif   | wholeT_0.01 | CBN                         |
| 24 | Yes         | 11      | 11-A | 1000   | exp   | Inf | unif   | wholeT_0.5  | CBN, CBN-A                  |
| 25 | Yes         | 11      | 11-A | 1000   | McF_4 | 0   | last   | singleC     | CBN-A, OT, OT-A             |
| 26 | Yes         | 11      | 11-A | 1000   | McF_4 | 0   | last   | wholeT_0.01 | OT, OT-A                    |
| 27 | Yes         | 11      | 11-A | 1000   | McF_4 | 0   | last   | wholeT_0.5  | CBN, CBN-A, OT, OT-A        |
| 28 | Yes         | 11      | 11-A | 1000   | McF_4 | 0   | unif   | singleC     | CBN, CBN-A                  |
| 29 | Yes         | 11      | 11-A | 1000   | McF_4 | 0   | unif   | wholeT_0.01 | CBN, CBN-A                  |
| 30 | Yes         | 11      | 11-A | 1000   | McF_4 | 0   | unif   | wholeT_0.5  | CBN, CBN-A                  |
| 31 | Yes         | 11      | 11-A | 1000   | McF_4 | Inf | last   | singleC     | CBN, CBN-A, OT, OT-A        |
| 32 | Yes         | 11      | 11-A | 1000   | McF_4 | Inf | last   | wholeT_0.01 | CBN, CBN-A, DiP-A, OT, OT-A |
| 33 | Yes         | 11      | 11-A | 1000   | McF_4 | Inf | last   | wholeT_0.5  | CBN, CBN-A                  |
| 34 | Yes         | 11      | 11-A | 1000   | McF_4 | Inf | unif   | singleC     | CBN, CBN-A                  |
| 35 | Yes         | 11      | 11-A | 1000   | McF_4 | Inf | unif   | wholeT_0.01 | CBN, CBN-A                  |
| 36 | Yes         | 11      | 11-A | 1000   | McF_4 | Inf | unif   | wholeT_0.5  | CBN, CBN-A                  |
| 37 | Yes         | 11      | 11-A | 1000   | McF_6 | 0   | last   | singleC     | DiP, DiP-A                  |

Table 11: (continued)

|    | Conjunction | Drivers | Tree | S.Size | Model | sh  | S.Time | S.Type      | Best method(s)               |
|----|-------------|---------|------|--------|-------|-----|--------|-------------|------------------------------|
| 38 | Yes         | 11      | 11-A | 1000   | McF_6 | 0   | last   | wholeT_0.01 | DiP, DiP-A                   |
| 39 | Yes         | 11      | 11-A | 1000   | McF_6 | 0   | last   | wholeT_0.5  | DiP, DiP-A                   |
| 40 | Yes         | 11      | 11-A | 1000   | McF_6 | 0   | unif   | singleC     | none                         |
| 41 | Yes         | 11      | 11-A | 1000   | McF_6 | 0   | unif   | wholeT_0.01 | CBN, CBN-A, DiP, DiP-A, OT-A |
| 42 | Yes         | 11      | 11-A | 1000   | McF_6 | 0   | unif   | wholeT_0.5  | none                         |
| 43 | Yes         | 11      | 11-A | 1000   | McF_6 | Inf | last   | singleC     | DiP-A, OT, OT-A              |
| 44 | Yes         | 11      | 11-A | 1000   | McF_6 | Inf | last   | wholeT_0.01 | DiP-A                        |
| 45 | Yes         | 11      | 11-A | 1000   | McF_6 | Inf | last   | wholeT_0.5  | DiP-A, OT, OT-A              |
| 46 | Yes         | 11      | 11-A | 1000   | McF_6 | Inf | unif   | singleC     | CBN, OT, OT-A                |
| 47 | Yes         | 11      | 11-A | 1000   | McF_6 | Inf | unif   | wholeT_0.01 | CBN, CBN-A, OT, OT-A         |
| 48 | Yes         | 11      | 11-A | 1000   | McF_6 | Inf | unif   | wholeT_0.5  | CBN, CBN-A, OT, OT-A         |
| 49 | Yes         | 11      | 11-A | 200    | Bozic | 0   | last   | singleC     | CBN, CBN-A                   |
| 50 | Yes         | 11      | 11-A | 200    | Bozic | 0   | last   | wholeT_0.01 | CBN, CBN-A, OT, OT-A         |
| 51 | Yes         | 11      | 11-A | 200    | Bozic | 0   | last   | wholeT_0.5  | CBN, CBN-A                   |
| 52 | Yes         | 11      | 11-A | 200    | Bozic | 0   | unif   | singleC     | CBN, CBN-A                   |
| 53 | Yes         | 11      | 11-A | 200    | Bozic | 0   | unif   | wholeT_0.01 | CBN, CBN-A                   |
| 54 | Yes         | 11      | 11-A | 200    | Bozic | 0   | unif   | wholeT_0.5  | CBN, CBN-A                   |
| 55 | Yes         | 11      | 11-A | 200    | Bozic | Inf | last   | singleC     | CBN, CBN-A                   |
| 56 | Yes         | 11      | 11-A | 200    | Bozic | Inf | last   | wholeT_0.01 | CBN, CBN-A                   |
| 57 | Yes         | 11      | 11-A | 200    | Bozic | Inf | last   | wholeT_0.5  | CBN, CBN-A                   |
| 58 | Yes         | 11      | 11-A | 200    | Bozic | Inf | unif   | singleC     | CBN, CBN-A                   |
| 59 | Yes         | 11      | 11-A | 200    | Bozic | Inf | unif   | wholeT_0.01 | CBN, CBN-A                   |
| 60 | Yes         | 11      | 11-A | 200    | Bozic | Inf | unif   | wholeT_0.5  | CBN, CBN-A                   |
| 61 | Yes         | 11      | 11-A | 200    | exp   | 0   | last   | singleC     | CBN, CBN-A                   |
| 62 | Yes         | 11      | 11-A | 200    | exp   | 0   | last   | wholeT_0.01 | CBN, CBN-A                   |
| 63 | Yes         | 11      | 11-A | 200    | exp   | 0   | last   | wholeT_0.5  | CBN, CBN-A                   |
| 64 | Yes         | 11      | 11-A | 200    | exp   | 0   | unif   | singleC     | CBN, CBN-A                   |
| 65 | Yes         | 11      | 11-A | 200    | exp   | 0   | unif   | wholeT_0.01 | CBN, CBN-A                   |
| 66 | Yes         | 11      | 11-A | 200    | exp   | 0   | unif   | wholeT_0.5  | CBN, CBN-A                   |
| 67 | Yes         | 11      | 11-A | 200    | exp   | Inf | last   | singleC     | CBN, CBN-A                   |
| 68 | Yes         | 11      | 11-A | 200    | exp   | Inf | last   | wholeT_0.01 | CBN-A                        |
| 69 | Yes         | 11      | 11-A | 200    | exp   | Inf | last   | wholeT_0.5  | CBN, CBN-A                   |
| 70 | Yes         | 11      | 11-A | 200    | exp   | Inf | unif   | singleC     | CBN, CBN-A                   |
| 71 | Yes         | 11      | 11-A | 200    | exp   | Inf | unif   | wholeT_0.01 | CBN, CBN-A                   |
| 72 | Yes         | 11      | 11-A | 200    | exp   | Inf | unif   | wholeT_0.5  | CBN, CBN-A                   |
| 73 | Yes         | 11      | 11-A | 200    | McF_4 | 0   | last   | singleC     | CBN, CBN-A, OT, OT-A         |
| 74 | Yes         | 11      | 11-A | 200    | McF_4 | 0   | last   | wholeT_0.01 | CBN-A, OT, OT-A              |
| 75 | Yes         | 11      | 11-A | 200    | McF_4 | 0   | last   | wholeT_0.5  | CBN, CBN-A                   |
| 76 | Yes         | 11      | 11-A | 200    | McF_4 | 0   | unif   | singleC     | CBN, CBN-A                   |
| 77 | Yes         | 11      | 11-A | 200    | McF_4 | 0   | unif   | wholeT_0.01 | CBN, CBN-A                   |

Table 11: (continued)

|     | Conjunction | Drivers | Tree | S.Size | Model | sh  | S.Time | S.Type      | Best method(s)       |
|-----|-------------|---------|------|--------|-------|-----|--------|-------------|----------------------|
| 78  | Yes         | 11      | 11-A | 200    | McF_4 | 0   | unif   | wholeT_0.5  | CBN, CBN-A           |
| 79  | Yes         | 11      | 11-A | 200    | McF_4 | Inf | last   | singleC     | CBN, CBN-A           |
| 80  | Yes         | 11      | 11-A | 200    | McF_4 | Inf | last   | wholeT_0.01 | CBN, CBN-A, OT, OT-A |
| 81  | Yes         | 11      | 11-A | 200    | McF_4 | Inf | last   | wholeT_0.5  | CBN, CBN-A, OT, OT-A |
| 82  | Yes         | 11      | 11-A | 200    | McF_4 | Inf | unif   | singleC     | CBN, CBN-A           |
| 83  | Yes         | 11      | 11-A | 200    | McF_4 | Inf | unif   | wholeT_0.01 | CBN, CBN-A           |
| 84  | Yes         | 11      | 11-A | 200    | McF_4 | Inf | unif   | wholeT_0.5  | CBN, CBN-A           |
| 85  | Yes         | 11      | 11-A | 200    | McF_6 | 0   | last   | singleC     | OT, OT-A             |
| 86  | Yes         | 11      | 11-A | 200    | McF_6 | 0   | last   | wholeT_0.01 | OT, OT-A             |
| 87  | Yes         | 11      | 11-A | 200    | McF_6 | 0   | last   | wholeT_0.5  | OT, OT-A             |
| 88  | Yes         | 11      | 11-A | 200    | McF_6 | 0   | unif   | singleC     | CBN-A, OT, OT-A      |
| 89  | Yes         | 11      | 11-A | 200    | McF_6 | 0   | unif   | wholeT_0.01 | CBN, CBN-A, OT, OT-A |
| 90  | Yes         | 11      | 11-A | 200    | McF_6 | 0   | unif   | wholeT_0.5  | CBN, CBN-A, OT, OT-A |
| 91  | Yes         | 11      | 11-A | 200    | McF_6 | Inf | last   | singleC     | OT, OT-A             |
| 92  | Yes         | 11      | 11-A | 200    | McF_6 | Inf | last   | wholeT_0.01 | OT, OT-A             |
| 93  | Yes         | 11      | 11-A | 200    | McF_6 | Inf | last   | wholeT_0.5  | OT, OT-A             |
| 94  | Yes         | 11      | 11-A | 200    | McF_6 | Inf | unif   | singleC     | CBN, CBN-A, OT, OT-A |
| 95  | Yes         | 11      | 11-A | 200    | McF_6 | Inf | unif   | wholeT_0.01 | CBN, CBN-A, OT, OT-A |
| 96  | Yes         | 11      | 11-A | 200    | McF_6 | Inf | unif   | wholeT_0.5  | CBN, CBN-A, OT, OT-A |
| 97  | Yes         | 11      | 11-A | 100    | Bozic | 0   | last   | singleC     | CBN, CBN-A           |
| 98  | Yes         | 11      | 11-A | 100    | Bozic | 0   | last   | wholeT_0.01 | CBN, CBN-A           |
| 99  | Yes         | 11      | 11-A | 100    | Bozic | 0   | last   | wholeT_0.5  | CBN, CBN-A           |
| 100 | Yes         | 11      | 11-A | 100    | Bozic | 0   | unif   | singleC     | CBN, CBN-A           |
| 101 | Yes         | 11      | 11-A | 100    | Bozic | 0   | unif   | wholeT_0.01 | CBN, CBN-A           |
| 102 | Yes         | 11      | 11-A | 100    | Bozic | 0   | unif   | wholeT_0.5  | CBN, CBN-A           |
| 103 | Yes         | 11      | 11-A | 100    | Bozic | Inf | last   | singleC     | CBN, CBN-A           |
| 104 | Yes         | 11      | 11-A | 100    | Bozic | Inf | last   | wholeT_0.01 | CBN, CBN-A           |
| 105 | Yes         | 11      | 11-A | 100    | Bozic | Inf | last   | wholeT_0.5  | CBN, CBN-A           |
| 106 | Yes         | 11      | 11-A | 100    | Bozic | Inf | unif   | singleC     | CBN, CBN-A           |
| 107 | Yes         | 11      | 11-A | 100    | Bozic | Inf | unif   | wholeT_0.01 | CBN, CBN-A           |
| 108 | Yes         | 11      | 11-A | 100    | Bozic | Inf | unif   | wholeT_0.5  | CBN, CBN-A           |
| 109 | Yes         | 11      | 11-A | 100    | exp   | 0   | last   | singleC     | CBN, CBN-A           |
| 110 | Yes         | 11      | 11-A | 100    | exp   | 0   | last   | wholeT_0.01 | CBN, CBN-A           |
| 111 | Yes         | 11      | 11-A | 100    | exp   | 0   | last   | wholeT_0.5  | CBN, CBN-A           |
| 112 | Yes         | 11      | 11-A | 100    | exp   | 0   | unif   | singleC     | CBN, CBN-A           |
| 113 | Yes         | 11      | 11-A | 100    | exp   | 0   | unif   | wholeT_0.01 | CBN, CBN-A           |
| 114 | Yes         | 11      | 11-A | 100    | exp   | 0   | unif   | wholeT_0.5  | CBN, CBN-A           |
| 115 | Yes         | 11      | 11-A | 100    | exp   | Inf | last   | singleC     | CBN, CBN-A           |
| 116 | Yes         | 11      | 11-A | 100    | exp   | Inf | last   | wholeT_0.01 | CBN, CBN-A           |
| 117 | Yes         | 11      | 11-A | 100    | exp   | Inf | last   | wholeT_0.5  | CBN, CBN-A           |

Table 11: (continued)

|     | Conjunction | Drivers | Tree | S.Size | Model | sh  | S.Time | S.Type      | Best method(s)       |
|-----|-------------|---------|------|--------|-------|-----|--------|-------------|----------------------|
| 118 | Yes         | 11      | 11-A | 100    | exp   | Inf | unif   | singleC     | CBN, CBN-A           |
| 119 | Yes         | 11      | 11-A | 100    | exp   | Inf | unif   | wholeT_0.01 | CBN, CBN-A           |
| 120 | Yes         | 11      | 11-A | 100    | exp   | Inf | unif   | wholeT_0.5  | CBN, CBN-A           |
| 121 | Yes         | 11      | 11-A | 100    | McF_4 | 0   | last   | singleC     | CBN, CBN-A           |
| 122 | Yes         | 11      | 11-A | 100    | McF_4 | 0   | last   | wholeT_0.01 | OT, OT-A             |
| 123 | Yes         | 11      | 11-A | 100    | McF_4 | 0   | last   | wholeT_0.5  | CBN, CBN-A, OT       |
| 124 | Yes         | 11      | 11-A | 100    | McF_4 | 0   | unif   | singleC     | CBN, CBN-A           |
| 125 | Yes         | 11      | 11-A | 100    | McF_4 | 0   | unif   | wholeT_0.01 | CBN                  |
| 126 | Yes         | 11      | 11-A | 100    | McF_4 | 0   | unif   | wholeT_0.5  | CBN, CBN-A           |
| 127 | Yes         | 11      | 11-A | 100    | McF_4 | Inf | last   | singleC     | CBN, CBN-A, OT, OT-A |
| 128 | Yes         | 11      | 11-A | 100    | McF_4 | Inf | last   | wholeT_0.01 | CBN, CBN-A, OT, OT-A |
| 129 | Yes         | 11      | 11-A | 100    | McF_4 | Inf | last   | wholeT_0.5  | CBN, CBN-A           |
| 130 | Yes         | 11      | 11-A | 100    | McF_4 | Inf | unif   | singleC     | CBN, CBN-A           |
| 131 | Yes         | 11      | 11-A | 100    | McF_4 | Inf | unif   | wholeT_0.01 | CBN, CBN-A           |
| 132 | Yes         | 11      | 11-A | 100    | McF_4 | Inf | unif   | wholeT_0.5  | CBN, CBN-A           |
| 133 | Yes         | 11      | 11-A | 100    | McF_6 | 0   | last   | singleC     | OT, OT-A             |
| 134 | Yes         | 11      | 11-A | 100    | McF_6 | 0   | last   | wholeT_0.01 | OT, OT-A             |
| 135 | Yes         | 11      | 11-A | 100    | McF_6 | 0   | last   | wholeT_0.5  | OT, OT-A             |
| 136 | Yes         | 11      | 11-A | 100    | McF_6 | 0   | unif   | singleC     | CBN, CBN-A, OT, OT-A |
| 137 | Yes         | 11      | 11-A | 100    | McF_6 | 0   | unif   | wholeT_0.01 | CBN, CBN-A, OT, OT-A |
| 138 | Yes         | 11      | 11-A | 100    | McF_6 | 0   | unif   | wholeT_0.5  | CBN, CBN-A, OT, OT-A |
| 139 | Yes         | 11      | 11-A | 100    | McF_6 | Inf | last   | singleC     | OT, OT-A             |
| 140 | Yes         | 11      | 11-A | 100    | McF_6 | Inf | last   | wholeT_0.01 | OT, OT-A             |
| 141 | Yes         | 11      | 11-A | 100    | McF_6 | Inf | last   | wholeT_0.5  | OT, OT-A             |
| 142 | Yes         | 11      | 11-A | 100    | McF_6 | Inf | unif   | singleC     | CBN, CBN-A           |
| 143 | Yes         | 11      | 11-A | 100    | McF_6 | Inf | unif   | wholeT_0.01 | CBN, CBN-A, OT, OT-A |
| 144 | Yes         | 11      | 11-A | 100    | McF_6 | Inf | unif   | wholeT_0.5  | CBN-A, OT, OT-A      |
| 145 | Yes         | 9       | 9-A  | 1000   | Bozic | 0   | last   | singleC     | CBN, CBN-A           |
| 146 | Yes         | 9       | 9-A  | 1000   | Bozic | 0   | last   | wholeT_0.01 | CBN, CBN-A           |
| 147 | Yes         | 9       | 9-A  | 1000   | Bozic | 0   | last   | wholeT_0.5  | CBN, CBN-A           |
| 148 | Yes         | 9       | 9-A  | 1000   | Bozic | 0   | unif   | singleC     | CBN, CBN-A           |
| 149 | Yes         | 9       | 9-A  | 1000   | Bozic | 0   | unif   | wholeT_0.01 | CBN, CBN-A           |
| 150 | Yes         | 9       | 9-A  | 1000   | Bozic | 0   | unif   | wholeT_0.5  | CBN, CBN-A           |
| 151 | Yes         | 9       | 9-A  | 1000   | Bozic | Inf | last   | singleC     | CBN, CBN-A           |
| 152 | Yes         | 9       | 9-A  | 1000   | Bozic | Inf | last   | wholeT_0.01 | CBN, CBN-A           |
| 153 | Yes         | 9       | 9-A  | 1000   | Bozic | Inf | last   | wholeT_0.5  | CBN, CBN-A           |
| 154 | Yes         | 9       | 9-A  | 1000   | Bozic | Inf | unif   | singleC     | CBN, CBN-A           |
| 155 | Yes         | 9       | 9-A  | 1000   | Bozic | Inf | unif   | wholeT_0.01 | CBN, CBN-A           |
| 156 | Yes         | 9       | 9-A  | 1000   | Bozic | Inf | unif   | wholeT_0.5  | CBN                  |
| 157 | Yes         | 9       | 9-A  | 1000   | exp   | 0   | last   | singleC     | CBN, CBN-A           |

Table 11: (continued)

|     | Conjunction | Drivers | Tree | S.Size | Model | sh  | S.Time | S.Type      | Best method(s)   |
|-----|-------------|---------|------|--------|-------|-----|--------|-------------|------------------|
| 158 | Yes         | 9       | 9-A  | 1000   | exp   | 0   | last   | wholeT_0.01 | CBN, CBN-A       |
| 159 | Yes         | 9       | 9-A  | 1000   | exp   | 0   | last   | wholeT_0.5  | CBN, CBN-A       |
| 160 | Yes         | 9       | 9-A  | 1000   | exp   | 0   | unif   | singleC     | CBN, CBN-A       |
| 161 | Yes         | 9       | 9-A  | 1000   | exp   | 0   | unif   | wholeT_0.01 | CBN, CBN-A       |
| 162 | Yes         | 9       | 9-A  | 1000   | exp   | 0   | unif   | wholeT_0.5  | CBN, CBN-A       |
| 163 | Yes         | 9       | 9-A  | 1000   | exp   | Inf | last   | singleC     | CBN, CBN-A       |
| 164 | Yes         | 9       | 9-A  | 1000   | exp   | Inf | last   | wholeT_0.01 | CBN, CBN-A       |
| 165 | Yes         | 9       | 9-A  | 1000   | exp   | Inf | last   | wholeT_0.5  | CBN, CBN-A       |
| 166 | Yes         | 9       | 9-A  | 1000   | exp   | Inf | unif   | singleC     | CBN, CBN-A       |
| 167 | Yes         | 9       | 9-A  | 1000   | exp   | Inf | unif   | wholeT_0.01 | CBN, CBN-A       |
| 168 | Yes         | 9       | 9-A  | 1000   | exp   | Inf | unif   | wholeT_0.5  | CBN, CBN-A       |
| 169 | Yes         | 9       | 9-A  | 1000   | McF_4 | 0   | last   | singleC     | CBN, CBN-A, OT-A |
| 170 | Yes         | 9       | 9-A  | 1000   | McF_4 | 0   | last   | wholeT_0.01 | CBN              |
| 171 | Yes         | 9       | 9-A  | 1000   | McF_4 | 0   | last   | wholeT_0.5  | CBN, CBN-A, OT-A |
| 172 | Yes         | 9       | 9-A  | 1000   | McF_4 | 0   | unif   | singleC     | CBN, CBN-A       |
| 173 | Yes         | 9       | 9-A  | 1000   | McF_4 | 0   | unif   | wholeT_0.01 | CBN, CBN-A       |
| 174 | Yes         | 9       | 9-A  | 1000   | McF_4 | 0   | unif   | wholeT_0.5  | CBN, CBN-A       |
| 175 | Yes         | 9       | 9-A  | 1000   | McF_4 | Inf | last   | singleC     | CBN, CBN-A       |
| 176 | Yes         | 9       | 9-A  | 1000   | McF_4 | Inf | last   | wholeT_0.01 | CBN, CBN-A, OT-A |
| 177 | Yes         | 9       | 9-A  | 1000   | McF_4 | Inf | last   | wholeT_0.5  | CBN, CBN-A       |
| 178 | Yes         | 9       | 9-A  | 1000   | McF_4 | Inf | unif   | singleC     | CBN, CBN-A       |
| 179 | Yes         | 9       | 9-A  | 1000   | McF_4 | Inf | unif   | wholeT_0.01 | CBN, CBN-A       |
| 180 | Yes         | 9       | 9-A  | 1000   | McF_4 | Inf | unif   | wholeT_0.5  | CBN, CBN-A       |
| 181 | Yes         | 9       | 9-A  | 1000   | McF_6 | 0   | last   | singleC     | OT-A             |
| 182 | Yes         | 9       | 9-A  | 1000   | McF_6 | 0   | last   | wholeT_0.01 | DiP-A            |
| 183 | Yes         | 9       | 9-A  | 1000   | McF_6 | 0   | last   | wholeT_0.5  | OT-A             |
| 184 | Yes         | 9       | 9-A  | 1000   | McF_6 | 0   | unif   | singleC     | CBN, CBN-A       |
| 185 | Yes         | 9       | 9-A  | 1000   | McF_6 | 0   | unif   | wholeT_0.01 | CBN, CBN-A       |
| 186 | Yes         | 9       | 9-A  | 1000   | McF_6 | 0   | unif   | wholeT_0.5  | CBN, CBN-A       |
| 187 | Yes         | 9       | 9-A  | 1000   | McF_6 | Inf | last   | singleC     | OT-A             |
| 188 | Yes         | 9       | 9-A  | 1000   | McF_6 | Inf | last   | wholeT_0.01 | OT-A             |
| 189 | Yes         | 9       | 9-A  | 1000   | McF_6 | Inf | last   | wholeT_0.5  | DiP-A, OT-A      |
| 190 | Yes         | 9       | 9-A  | 1000   | McF_6 | Inf | unif   | singleC     | CBN, CBN-A       |
| 191 | Yes         | 9       | 9-A  | 1000   | McF_6 | Inf | unif   | wholeT_0.01 | CBN, CBN-A       |
| 192 | Yes         | 9       | 9-A  | 1000   | McF_6 | Inf | unif   | wholeT_0.5  | CBN, CBN-A       |
| 193 | Yes         | 9       | 9-A  | 200    | Bozic | 0   | last   | singleC     | CBN, CBN-A       |
| 194 | Yes         | 9       | 9-A  | 200    | Bozic | 0   | last   | wholeT_0.01 | CBN, CBN-A       |
| 195 | Yes         | 9       | 9-A  | 200    | Bozic | 0   | last   | wholeT_0.5  | CBN, CBN-A       |
| 196 | Yes         | 9       | 9-A  | 200    | Bozic | 0   | unif   | singleC     | CBN, CBN-A       |
| 197 | Yes         | 9       | 9-A  | 200    | Bozic | 0   | unif   | wholeT_0.01 | CBN, CBN-A       |

Table 11: (continued)

|     | Conjunction | Drivers | Tree | S.Size | Model | sh  | S.Time | S.Type      | Best method(s)       |
|-----|-------------|---------|------|--------|-------|-----|--------|-------------|----------------------|
| 198 | Yes         | 9       | 9-A  | 200    | Bozic | 0   | unif   | wholeT_0.5  | CBN, CBN-A           |
| 199 | Yes         | 9       | 9-A  | 200    | Bozic | Inf | last   | singleC     | CBN, CBN-A           |
| 200 | Yes         | 9       | 9-A  | 200    | Bozic | Inf | last   | wholeT_0.01 | CBN, CBN-A           |
| 201 | Yes         | 9       | 9-A  | 200    | Bozic | Inf | last   | wholeT_0.5  | CBN, CBN-A           |
| 202 | Yes         | 9       | 9-A  | 200    | Bozic | Inf | unif   | singleC     | CBN, CBN-A           |
| 203 | Yes         | 9       | 9-A  | 200    | Bozic | Inf | unif   | wholeT_0.01 | CBN, CBN-A           |
| 204 | Yes         | 9       | 9-A  | 200    | Bozic | Inf | unif   | wholeT_0.5  | CBN, CBN-A           |
| 205 | Yes         | 9       | 9-A  | 200    | exp   | 0   | last   | singleC     | CBN, CBN-A           |
| 206 | Yes         | 9       | 9-A  | 200    | exp   | 0   | last   | wholeT_0.01 | CBN, CBN-A           |
| 207 | Yes         | 9       | 9-A  | 200    | exp   | 0   | last   | wholeT_0.5  | CBN, CBN-A           |
| 208 | Yes         | 9       | 9-A  | 200    | exp   | 0   | unif   | singleC     | CBN, CBN-A           |
| 209 | Yes         | 9       | 9-A  | 200    | exp   | 0   | unif   | wholeT_0.01 | CBN, CBN-A           |
| 210 | Yes         | 9       | 9-A  | 200    | exp   | 0   | unif   | wholeT_0.5  | CBN, CBN-A           |
| 211 | Yes         | 9       | 9-A  | 200    | exp   | Inf | last   | singleC     | CBN, CBN-A           |
| 212 | Yes         | 9       | 9-A  | 200    | exp   | Inf | last   | wholeT_0.01 | CBN, CBN-A           |
| 213 | Yes         | 9       | 9-A  | 200    | exp   | Inf | last   | wholeT_0.5  | CBN, CBN-A           |
| 214 | Yes         | 9       | 9-A  | 200    | exp   | Inf | unif   | singleC     | CBN, CBN-A           |
| 215 | Yes         | 9       | 9-A  | 200    | exp   | Inf | unif   | wholeT_0.01 | CBN, CBN-A           |
| 216 | Yes         | 9       | 9-A  | 200    | exp   | Inf | unif   | wholeT_0.5  | CBN, CBN-A           |
| 217 | Yes         | 9       | 9-A  | 200    | McF_4 | 0   | last   | singleC     | CBN, CBN-A, OT-A     |
| 218 | Yes         | 9       | 9-A  | 200    | McF_4 | 0   | last   | wholeT_0.01 | CBN, CBN-A, OT, OT-A |
| 219 | Yes         | 9       | 9-A  | 200    | McF_4 | 0   | last   | wholeT_0.5  | CBN, CBN-A           |
| 220 | Yes         | 9       | 9-A  | 200    | McF_4 | 0   | unif   | singleC     | CBN, CBN-A           |
| 221 | Yes         | 9       | 9-A  | 200    | McF_4 | 0   | unif   | wholeT_0.01 | CBN, CBN-A           |
| 222 | Yes         | 9       | 9-A  | 200    | McF_4 | 0   | unif   | wholeT_0.5  | CBN, CBN-A           |
| 223 | Yes         | 9       | 9-A  | 200    | McF_4 | Inf | last   | singleC     | CBN, CBN-A           |
| 224 | Yes         | 9       | 9-A  | 200    | McF_4 | Inf | last   | wholeT_0.01 | CBN, OT-A            |
| 225 | Yes         | 9       | 9-A  | 200    | McF_4 | Inf | last   | wholeT_0.5  | CBN, CBN-A           |
| 226 | Yes         | 9       | 9-A  | 200    | McF_4 | Inf | unif   | singleC     | CBN, CBN-A           |
| 227 | Yes         | 9       | 9-A  | 200    | McF_4 | Inf | unif   | wholeT_0.01 | CBN, CBN-A           |
| 228 | Yes         | 9       | 9-A  | 200    | McF_4 | Inf | unif   | wholeT_0.5  | CBN, CBN-A           |
| 229 | Yes         | 9       | 9-A  | 200    | McF_6 | 0   | last   | singleC     | OT-A                 |
| 230 | Yes         | 9       | 9-A  | 200    | McF_6 | 0   | last   | wholeT_0.01 | OT-A                 |
| 231 | Yes         | 9       | 9-A  | 200    | McF_6 | 0   | last   | wholeT_0.5  | OT-A                 |
| 232 | Yes         | 9       | 9-A  | 200    | McF_6 | 0   | unif   | singleC     | CBN, CBN-A           |
| 233 | Yes         | 9       | 9-A  | 200    | McF_6 | 0   | unif   | wholeT_0.01 | CBN, CBN-A           |
| 234 | Yes         | 9       | 9-A  | 200    | McF_6 | 0   | unif   | wholeT_0.5  | CBN, CBN-A           |
| 235 | Yes         | 9       | 9-A  | 200    | McF_6 | Inf | last   | singleC     | OT-A                 |
| 236 | Yes         | 9       | 9-A  | 200    | McF_6 | Inf | last   | wholeT_0.01 | OT-A                 |
| 237 | Yes         | 9       | 9-A  | 200    | McF_6 | Inf | last   | wholeT_0.5  | OT-A                 |

Table 11: (continued)

|     | Conjunction | Drivers | Tree | S.Size | Model | sh  | S.Time | S.Type      | Best method(s) |
|-----|-------------|---------|------|--------|-------|-----|--------|-------------|----------------|
| 238 | Yes         | 9       | 9-A  | 200    | McF_6 | Inf | unif   | singleC     | CBN, CBN-A     |
| 239 | Yes         | 9       | 9-A  | 200    | McF_6 | Inf | unif   | wholeT_0.01 | CBN, CBN-A     |
| 240 | Yes         | 9       | 9-A  | 200    | McF_6 | Inf | unif   | wholeT_0.5  | CBN, CBN-A     |
| 241 | Yes         | 9       | 9-A  | 100    | Bozic | 0   | last   | singleC     | CBN, CBN-A     |
| 242 | Yes         | 9       | 9-A  | 100    | Bozic | 0   | last   | wholeT_0.01 | CBN, CBN-A     |
| 243 | Yes         | 9       | 9-A  | 100    | Bozic | 0   | last   | wholeT_0.5  | CBN, CBN-A     |
| 244 | Yes         | 9       | 9-A  | 100    | Bozic | 0   | unif   | singleC     | CBN, CBN-A     |
| 245 | Yes         | 9       | 9-A  | 100    | Bozic | 0   | unif   | wholeT_0.01 | CBN, CBN-A     |
| 246 | Yes         | 9       | 9-A  | 100    | Bozic | 0   | unif   | wholeT_0.5  | CBN, CBN-A     |
| 247 | Yes         | 9       | 9-A  | 100    | Bozic | Inf | last   | singleC     | CBN, CBN-A     |
| 248 | Yes         | 9       | 9-A  | 100    | Bozic | Inf | last   | wholeT_0.01 | CBN, CBN-A     |
| 249 | Yes         | 9       | 9-A  | 100    | Bozic | Inf | last   | wholeT_0.5  | CBN, CBN-A     |
| 250 | Yes         | 9       | 9-A  | 100    | Bozic | Inf | unif   | singleC     | CBN, CBN-A     |
| 251 | Yes         | 9       | 9-A  | 100    | Bozic | Inf | unif   | wholeT_0.01 | CBN, CBN-A     |
| 252 | Yes         | 9       | 9-A  | 100    | Bozic | Inf | unif   | wholeT_0.5  | CBN, CBN-A     |
| 253 | Yes         | 9       | 9-A  | 100    | exp   | 0   | last   | singleC     | CBN            |
| 254 | Yes         | 9       | 9-A  | 100    | exp   | 0   | last   | wholeT_0.01 | CBN, CBN-A     |
| 255 | Yes         | 9       | 9-A  | 100    | exp   | 0   | last   | wholeT_0.5  | CBN, CBN-A     |
| 256 | Yes         | 9       | 9-A  | 100    | exp   | 0   | unif   | singleC     | CBN, CBN-A     |
| 257 | Yes         | 9       | 9-A  | 100    | exp   | 0   | unif   | wholeT_0.01 | CBN, CBN-A     |
| 258 | Yes         | 9       | 9-A  | 100    | exp   | 0   | unif   | wholeT_0.5  | CBN, CBN-A     |
| 259 | Yes         | 9       | 9-A  | 100    | exp   | Inf | last   | singleC     | CBN, CBN-A     |
| 260 | Yes         | 9       | 9-A  | 100    | exp   | Inf | last   | wholeT_0.01 | CBN, CBN-A     |
| 261 | Yes         | 9       | 9-A  | 100    | exp   | Inf | last   | wholeT_0.5  | CBN, CBN-A     |
| 262 | Yes         | 9       | 9-A  | 100    | exp   | Inf | unif   | singleC     | CBN, CBN-A     |
| 263 | Yes         | 9       | 9-A  | 100    | exp   | Inf | unif   | wholeT_0.01 | CBN, CBN-A     |
| 264 | Yes         | 9       | 9-A  | 100    | exp   | Inf | unif   | wholeT_0.5  | CBN, CBN-A     |
| 265 | Yes         | 9       | 9-A  | 100    | McF_4 | 0   | last   | singleC     | CBN, CBN-A     |
| 266 | Yes         | 9       | 9-A  | 100    | McF_4 | 0   | last   | wholeT_0.01 | CBN, CBN-A     |
| 267 | Yes         | 9       | 9-A  | 100    | McF_4 | 0   | last   | wholeT_0.5  | CBN, CBN-A     |
| 268 | Yes         | 9       | 9-A  | 100    | McF_4 | 0   | unif   | singleC     | CBN            |
| 269 | Yes         | 9       | 9-A  | 100    | McF_4 | 0   | unif   | wholeT_0.01 | CBN, CBN-A     |
| 270 | Yes         | 9       | 9-A  | 100    | McF_4 | 0   | unif   | wholeT_0.5  | CBN, CBN-A     |
| 271 | Yes         | 9       | 9-A  | 100    | McF_4 | Inf | last   | singleC     | CBN, CBN-A     |
| 272 | Yes         | 9       | 9-A  | 100    | McF_4 | Inf | last   | wholeT_0.01 | CBN            |
| 273 | Yes         | 9       | 9-A  | 100    | McF_4 | Inf | last   | wholeT_0.5  | CBN, CBN-A     |
| 274 | Yes         | 9       | 9-A  | 100    | McF_4 | Inf | unif   | singleC     | CBN, CBN-A     |
| 275 | Yes         | 9       | 9-A  | 100    | McF_4 | Inf | unif   | wholeT_0.01 | CBN, CBN-A     |
| 276 | Yes         | 9       | 9-A  | 100    | McF_4 | Inf | unif   | wholeT_0.5  | CBN, CBN-A     |
| 277 | Yes         | 9       | 9-A  | 100    | McF_6 | 0   | last   | singleC     | OT-A           |

Table 11: (continued)

|     | Conjunction | Drivers | Tree | S.Size | Model | sh  | S.Time | S.Type      | Best method(s)              |
|-----|-------------|---------|------|--------|-------|-----|--------|-------------|-----------------------------|
| 278 | Yes         | 9       | 9-A  | 100    | McF_6 | 0   | last   | wholeT_0.01 | OT-A                        |
| 279 | Yes         | 9       | 9-A  | 100    | McF_6 | 0   | last   | wholeT_0.5  | OT-A                        |
| 280 | Yes         | 9       | 9-A  | 100    | McF_6 | 0   | unif   | singleC     | CBN, CBN-A                  |
| 281 | Yes         | 9       | 9-A  | 100    | McF_6 | 0   | unif   | wholeT_0.01 | CBN, CBN-A                  |
| 282 | Yes         | 9       | 9-A  | 100    | McF_6 | 0   | unif   | wholeT_0.5  | CBN, CBN-A                  |
| 283 | Yes         | 9       | 9-A  | 100    | McF_6 | Inf | last   | singleC     | OT-A                        |
| 284 | Yes         | 9       | 9-A  | 100    | McF_6 | Inf | last   | wholeT_0.01 | OT-A                        |
| 285 | Yes         | 9       | 9-A  | 100    | McF_6 | Inf | last   | wholeT_0.5  | CBN, OT-A                   |
| 286 | Yes         | 9       | 9-A  | 100    | McF_6 | Inf | unif   | singleC     | CBN, CBN-A                  |
| 287 | Yes         | 9       | 9-A  | 100    | McF_6 | Inf | unif   | wholeT_0.01 | CBN-A                       |
| 288 | Yes         | 9       | 9-A  | 100    | McF_6 | Inf | unif   | wholeT_0.5  | CBN, CBN-A                  |
| 289 | Yes         | 7       | 7-A  | 1000   | Bozic | 0   | last   | singleC     | CBN, CBN-A, OT-A            |
| 290 | Yes         | 7       | 7-A  | 1000   | Bozic | 0   | last   | wholeT_0.01 | OT-A                        |
| 291 | Yes         | 7       | 7-A  | 1000   | Bozic | 0   | last   | wholeT_0.5  | CBN, CBN-A, OT-A            |
| 292 | Yes         | 7       | 7-A  | 1000   | Bozic | 0   | unif   | singleC     | CBN, CBN-A                  |
| 293 | Yes         | 7       | 7-A  | 1000   | Bozic | 0   | unif   | wholeT_0.01 | CBN, CBN-A                  |
| 294 | Yes         | 7       | 7-A  | 1000   | Bozic | 0   | unif   | wholeT_0.5  | CBN, CBN-A                  |
| 295 | Yes         | 7       | 7-A  | 1000   | Bozic | Inf | last   | singleC     | CBN, OT-A                   |
| 296 | Yes         | 7       | 7-A  | 1000   | Bozic | Inf | last   | wholeT_0.01 | CBN-A                       |
| 297 | Yes         | 7       | 7-A  | 1000   | Bozic | Inf | last   | wholeT_0.5  | CBN, OT-A                   |
| 298 | Yes         | 7       | 7-A  | 1000   | Bozic | Inf | unif   | singleC     | CBN, CBN-A                  |
| 299 | Yes         | 7       | 7-A  | 1000   | Bozic | Inf | unif   | wholeT_0.01 | CBN, CBN-A                  |
| 300 | Yes         | 7       | 7-A  | 1000   | Bozic | Inf | unif   | wholeT_0.5  | CBN, CBN-A                  |
| 301 | Yes         | 7       | 7-A  | 1000   | exp   | 0   | last   | singleC     | CBN-A                       |
| 302 | Yes         | 7       | 7-A  | 1000   | exp   | 0   | last   | wholeT_0.01 | CBN, CBN-A, OT-A            |
| 303 | Yes         | 7       | 7-A  | 1000   | exp   | 0   | last   | wholeT_0.5  | CBN, CBN-A                  |
| 304 | Yes         | 7       | 7-A  | 1000   | exp   | 0   | unif   | singleC     | CBN, CBN-A                  |
| 305 | Yes         | 7       | 7-A  | 1000   | exp   | 0   | unif   | wholeT_0.01 | CBN, CBN-A                  |
| 306 | Yes         | 7       | 7-A  | 1000   | exp   | 0   | unif   | wholeT_0.5  | CBN, CBN-A                  |
| 307 | Yes         | 7       | 7-A  | 1000   | exp   | Inf | last   | singleC     | CBN, CBN-A, OT-A            |
| 308 | Yes         | 7       | 7-A  | 1000   | exp   | Inf | last   | wholeT_0.01 | CBN-A                       |
| 309 | Yes         | 7       | 7-A  | 1000   | exp   | Inf | last   | wholeT_0.5  | CBN, CBN-A                  |
| 310 | Yes         | 7       | 7-A  | 1000   | exp   | Inf | unif   | singleC     | CBN, CBN-A                  |
| 311 | Yes         | 7       | 7-A  | 1000   | exp   | Inf | unif   | wholeT_0.01 | CBN, CBN-A                  |
| 312 | Yes         | 7       | 7-A  | 1000   | exp   | Inf | unif   | wholeT_0.5  | CBN, CBN-A                  |
| 313 | Yes         | 7       | 7-A  | 1000   | McF_4 | 0   | last   | singleC     | CBN, OT-A                   |
| 314 | Yes         | 7       | 7-A  | 1000   | McF_4 | 0   | last   | wholeT_0.01 | OT-A                        |
| 315 | Yes         | 7       | 7-A  | 1000   | McF_4 | 0   | last   | wholeT_0.5  | CBN, OT-A                   |
| 316 | Yes         | 7       | 7-A  | 1000   | McF_4 | 0   | unif   | singleC     | CBN, CBN-A, OT-A            |
| 317 | Yes         | 7       | 7-A  | 1000   | McF_4 | 0   | unif   | wholeT_0.01 | CBN-A, DiP, DiP-A, OT, OT-A |



Table 11: (continued)

|     | Conjunction | Drivers | Tree | S.Size | Model | sh  | S.Time | S.Type      | Best method(s)       |
|-----|-------------|---------|------|--------|-------|-----|--------|-------------|----------------------|
| 318 | Yes         | 7       | 7-A  | 1000   | McF_4 | 0   | unif   | wholeT_0.5  | CBN, CBN-A, OT, OT-A |
| 319 | Yes         | 7       | 7-A  | 1000   | McF_4 | Inf | last   | singleC     | CBN, OT-A            |
| 320 | Yes         | 7       | 7-A  | 1000   | McF_4 | Inf | last   | wholeT_0.01 | CBN, OT-A            |
| 321 | Yes         | 7       | 7-A  | 1000   | McF_4 | Inf | last   | wholeT_0.5  | CBN                  |
| 322 | Yes         | 7       | 7-A  | 1000   | McF_4 | Inf | unif   | singleC     | CBN, CBN-A           |
| 323 | Yes         | 7       | 7-A  | 1000   | McF_4 | Inf | unif   | wholeT_0.01 | CBN, CBN-A, OT, OT-A |
| 324 | Yes         | 7       | 7-A  | 1000   | McF_4 | Inf | unif   | wholeT_0.5  | CBN, CBN-A           |
| 325 | Yes         | 7       | 7-A  | 1000   | McF_6 | 0   | last   | singleC     | DiP-A                |
| 326 | Yes         | 7       | 7-A  | 1000   | McF_6 | 0   | last   | wholeT_0.01 | DiP-A, OT-A          |
| 327 | Yes         | 7       | 7-A  | 1000   | McF_6 | 0   | last   | wholeT_0.5  | DiP-A                |
| 328 | Yes         | 7       | 7-A  | 1000   | McF_6 | 0   | unif   | singleC     | CBN-A                |
| 329 | Yes         | 7       | 7-A  | 1000   | McF_6 | 0   | unif   | wholeT_0.01 | CBN-A, DiP, DiP-A    |
| 330 | Yes         | 7       | 7-A  | 1000   | McF_6 | 0   | unif   | wholeT_0.5  | CBN-A                |
| 331 | Yes         | 7       | 7-A  | 1000   | McF_6 | Inf | last   | singleC     | CBN-A, DiP-A         |
| 332 | Yes         | 7       | 7-A  | 1000   | McF_6 | Inf | last   | wholeT_0.01 | DiP-A                |
| 333 | Yes         | 7       | 7-A  | 1000   | McF_6 | Inf | last   | wholeT_0.5  | CBN-A, DiP-A         |
| 334 | Yes         | 7       | 7-A  | 1000   | McF_6 | Inf | unif   | singleC     | CBN-A                |
| 335 | Yes         | 7       | 7-A  | 1000   | McF_6 | Inf | unif   | wholeT_0.01 | CBN-A                |
| 336 | Yes         | 7       | 7-A  | 1000   | McF_6 | Inf | unif   | wholeT_0.5  | CBN-A                |
| 337 | Yes         | 7       | 7-A  | 200    | Bozic | 0   | last   | singleC     | CBN                  |
| 338 | Yes         | 7       | 7-A  | 200    | Bozic | 0   | last   | wholeT_0.01 | CBN, OT-A            |
| 339 | Yes         | 7       | 7-A  | 200    | Bozic | 0   | last   | wholeT_0.5  | CBN, CBN-A           |
| 340 | Yes         | 7       | 7-A  | 200    | Bozic | 0   | unif   | singleC     | CBN, CBN-A           |
| 341 | Yes         | 7       | 7-A  | 200    | Bozic | 0   | unif   | wholeT_0.01 | CBN, CBN-A           |
| 342 | Yes         | 7       | 7-A  | 200    | Bozic | 0   | unif   | wholeT_0.5  | CBN, CBN-A           |
| 343 | Yes         | 7       | 7-A  | 200    | Bozic | Inf | last   | singleC     | CBN, CBN-A, OT-A     |
| 344 | Yes         | 7       | 7-A  | 200    | Bozic | Inf | last   | wholeT_0.01 | CBN-A                |
| 345 | Yes         | 7       | 7-A  | 200    | Bozic | Inf | last   | wholeT_0.5  | CBN, OT-A            |
| 346 | Yes         | 7       | 7-A  | 200    | Bozic | Inf | unif   | singleC     | CBN, CBN-A           |
| 347 | Yes         | 7       | 7-A  | 200    | Bozic | Inf | unif   | wholeT_0.01 | CBN, CBN-A           |
| 348 | Yes         | 7       | 7-A  | 200    | Bozic | Inf | unif   | wholeT_0.5  | CBN, CBN-A           |
| 349 | Yes         | 7       | 7-A  | 200    | exp   | 0   | last   | singleC     | CBN, CBN-A           |
| 350 | Yes         | 7       | 7-A  | 200    | exp   | 0   | last   | wholeT_0.01 | CBN, CBN-A           |
| 351 | Yes         | 7       | 7-A  | 200    | exp   | 0   | last   | wholeT_0.5  | CBN, CBN-A           |
| 352 | Yes         | 7       | 7-A  | 200    | exp   | 0   | unif   | singleC     | CBN, CBN-A           |
| 353 | Yes         | 7       | 7-A  | 200    | exp   | 0   | unif   | wholeT_0.01 | CBN, CBN-A           |
| 354 | Yes         | 7       | 7-A  | 200    | exp   | 0   | unif   | wholeT_0.5  | CBN, CBN-A           |
| 355 | Yes         | 7       | 7-A  | 200    | exp   | Inf | last   | singleC     | CBN                  |
| 356 | Yes         | 7       | 7-A  | 200    | exp   | Inf | last   | wholeT_0.01 | CBN-A                |
| 357 | Yes         | 7       | 7-A  | 200    | exp   | Inf | last   | wholeT_0.5  | CBN                  |

Table 11: (continued)

|     | Conjunction | Drivers | Tree | S.Size | Model | sh  | S.Time | S.Type      | Best method(s)       |
|-----|-------------|---------|------|--------|-------|-----|--------|-------------|----------------------|
| 358 | Yes         | 7       | 7-A  | 200    | exp   | Inf | unif   | singleC     | CBN, CBN-A           |
| 359 | Yes         | 7       | 7-A  | 200    | exp   | Inf | unif   | wholeT_0.01 | CBN-A                |
| 360 | Yes         | 7       | 7-A  | 200    | exp   | Inf | unif   | wholeT_0.5  | CBN, CBN-A           |
| 361 | Yes         | 7       | 7-A  | 200    | McF_4 | 0   | last   | singleC     | CBN, OT-A            |
| 362 | Yes         | 7       | 7-A  | 200    | McF_4 | 0   | last   | wholeT_0.01 | OT-A                 |
| 363 | Yes         | 7       | 7-A  | 200    | McF_4 | 0   | last   | wholeT_0.5  | CBN, OT-A            |
| 364 | Yes         | 7       | 7-A  | 200    | McF_4 | 0   | unif   | singleC     | CBN, CBN-A           |
| 365 | Yes         | 7       | 7-A  | 200    | McF_4 | 0   | unif   | wholeT_0.01 | CBN, CBN-A, OT, OT-A |
| 366 | Yes         | 7       | 7-A  | 200    | McF_4 | 0   | unif   | wholeT_0.5  | CBN, CBN-A           |
| 367 | Yes         | 7       | 7-A  | 200    | McF_4 | Inf | last   | singleC     | CBN                  |
| 368 | Yes         | 7       | 7-A  | 200    | McF_4 | Inf | last   | wholeT_0.01 | CBN, OT-A            |
| 369 | Yes         | 7       | 7-A  | 200    | McF_4 | Inf | last   | wholeT_0.5  | CBN, CBN-A           |
| 370 | Yes         | 7       | 7-A  | 200    | McF_4 | Inf | unif   | singleC     | CBN, CBN-A           |
| 371 | Yes         | 7       | 7-A  | 200    | McF_4 | Inf | unif   | wholeT_0.01 | CBN, CBN-A           |
| 372 | Yes         | 7       | 7-A  | 200    | McF_4 | Inf | unif   | wholeT_0.5  | CBN, CBN-A           |
| 373 | Yes         | 7       | 7-A  | 200    | McF_6 | 0   | last   | singleC     | CBN-A, OT-A          |
| 374 | Yes         | 7       | 7-A  | 200    | McF_6 | 0   | last   | wholeT_0.01 | OT-A                 |
| 375 | Yes         | 7       | 7-A  | 200    | McF_6 | 0   | last   | wholeT_0.5  | CBN-A, OT-A          |
| 376 | Yes         | 7       | 7-A  | 200    | McF_6 | 0   | unif   | singleC     | CBN-A                |
| 377 | Yes         | 7       | 7-A  | 200    | McF_6 | 0   | unif   | wholeT_0.01 | CBN-A, OT, OT-A      |
| 378 | Yes         | 7       | 7-A  | 200    | McF_6 | 0   | unif   | wholeT_0.5  | CBN-A                |
| 379 | Yes         | 7       | 7-A  | 200    | McF_6 | Inf | last   | singleC     | CBN, CBN-A, OT-A     |
| 380 | Yes         | 7       | 7-A  | 200    | McF_6 | Inf | last   | wholeT_0.01 | OT-A                 |
| 381 | Yes         | 7       | 7-A  | 200    | McF_6 | Inf | last   | wholeT_0.5  | CBN, CBN-A, OT-A     |
| 382 | Yes         | 7       | 7-A  | 200    | McF_6 | Inf | unif   | singleC     | CBN-A                |
| 383 | Yes         | 7       | 7-A  | 200    | McF_6 | Inf | unif   | wholeT_0.01 | CBN-A                |
| 384 | Yes         | 7       | 7-A  | 200    | McF_6 | Inf | unif   | wholeT_0.5  | CBN-A                |
| 385 | Yes         | 7       | 7-A  | 100    | Bozic | 0   | last   | singleC     | CBN, CBN-A           |
| 386 | Yes         | 7       | 7-A  | 100    | Bozic | 0   | last   | wholeT_0.01 | CBN, OT-A            |
| 387 | Yes         | 7       | 7-A  | 100    | Bozic | 0   | last   | wholeT_0.5  | CBN, CBN-A           |
| 388 | Yes         | 7       | 7-A  | 100    | Bozic | 0   | unif   | singleC     | CBN, CBN-A           |
| 389 | Yes         | 7       | 7-A  | 100    | Bozic | 0   | unif   | wholeT_0.01 | CBN, CBN-A           |
| 390 | Yes         | 7       | 7-A  | 100    | Bozic | 0   | unif   | wholeT_0.5  | CBN, CBN-A           |
| 391 | Yes         | 7       | 7-A  | 100    | Bozic | Inf | last   | singleC     | CBN, CBN-A, OT-A     |
| 392 | Yes         | 7       | 7-A  | 100    | Bozic | Inf | last   | wholeT_0.01 | CBN-A                |
| 393 | Yes         | 7       | 7-A  | 100    | Bozic | Inf | last   | wholeT_0.5  | CBN, CBN-A, OT-A     |
| 394 | Yes         | 7       | 7-A  | 100    | Bozic | Inf | unif   | singleC     | CBN, CBN-A           |
| 395 | Yes         | 7       | 7-A  | 100    | Bozic | Inf | unif   | wholeT_0.01 | CBN, CBN-A           |
| 396 | Yes         | 7       | 7-A  | 100    | Bozic | Inf | unif   | wholeT_0.5  | CBN, CBN-A           |
| 397 | Yes         | 7       | 7-A  | 100    | exp   | 0   | last   | singleC     | CBN, CBN-A           |

Table 11: (continued)

|     | Conjunction | Drivers | Tree | S.Size | Model | sh  | S.Time | S.Type      | Best method(s)       |
|-----|-------------|---------|------|--------|-------|-----|--------|-------------|----------------------|
| 398 | Yes         | 7       | 7-A  | 100    | exp   | 0   | last   | wholeT_0.01 | CBN, CBN-A           |
| 399 | Yes         | 7       | 7-A  | 100    | exp   | 0   | last   | wholeT_0.5  | CBN-A                |
| 400 | Yes         | 7       | 7-A  | 100    | exp   | 0   | unif   | singleC     | CBN, CBN-A           |
| 401 | Yes         | 7       | 7-A  | 100    | exp   | 0   | unif   | wholeT_0.01 | CBN, CBN-A           |
| 402 | Yes         | 7       | 7-A  | 100    | exp   | 0   | unif   | wholeT_0.5  | CBN, CBN-A           |
| 403 | Yes         | 7       | 7-A  | 100    | exp   | Inf | last   | singleC     | CBN, CBN-A           |
| 404 | Yes         | 7       | 7-A  | 100    | exp   | Inf | last   | wholeT_0.01 | CBN-A                |
| 405 | Yes         | 7       | 7-A  | 100    | exp   | Inf | last   | wholeT_0.5  | CBN                  |
| 406 | Yes         | 7       | 7-A  | 100    | exp   | Inf | unif   | singleC     | CBN, CBN-A           |
| 407 | Yes         | 7       | 7-A  | 100    | exp   | Inf | unif   | wholeT_0.01 | CBN, CBN-A           |
| 408 | Yes         | 7       | 7-A  | 100    | exp   | Inf | unif   | wholeT_0.5  | CBN, CBN-A           |
| 409 | Yes         | 7       | 7-A  | 100    | McF_4 | 0   | last   | singleC     | CBN, CBN-A, OT-A     |
| 410 | Yes         | 7       | 7-A  | 100    | McF_4 | 0   | last   | wholeT_0.01 | OT-A                 |
| 411 | Yes         | 7       | 7-A  | 100    | McF_4 | 0   | last   | wholeT_0.5  | CBN, OT-A            |
| 412 | Yes         | 7       | 7-A  | 100    | McF_4 | 0   | unif   | singleC     | CBN-A                |
| 413 | Yes         | 7       | 7-A  | 100    | McF_4 | 0   | unif   | wholeT_0.01 | CBN, CBN-A, OT-A     |
| 414 | Yes         | 7       | 7-A  | 100    | McF_4 | 0   | unif   | wholeT_0.5  | CBN-A                |
| 415 | Yes         | 7       | 7-A  | 100    | McF_4 | Inf | last   | singleC     | CBN, CBN-A           |
| 416 | Yes         | 7       | 7-A  | 100    | McF_4 | Inf | last   | wholeT_0.01 | CBN, CBN-A, OT-A     |
| 417 | Yes         | 7       | 7-A  | 100    | McF_4 | Inf | last   | wholeT_0.5  | CBN, CBN-A           |
| 418 | Yes         | 7       | 7-A  | 100    | McF_4 | Inf | unif   | singleC     | CBN, CBN-A           |
| 419 | Yes         | 7       | 7-A  | 100    | McF_4 | Inf | unif   | wholeT_0.01 | CBN, CBN-A           |
| 420 | Yes         | 7       | 7-A  | 100    | McF_4 | Inf | unif   | wholeT_0.5  | CBN, CBN-A           |
| 421 | Yes         | 7       | 7-A  | 100    | McF_6 | 0   | last   | singleC     | CBN, CBN-A, OT-A     |
| 422 | Yes         | 7       | 7-A  | 100    | McF_6 | 0   | last   | wholeT_0.01 | OT-A                 |
| 423 | Yes         | 7       | 7-A  | 100    | McF_6 | 0   | last   | wholeT_0.5  | CBN-A, OT-A          |
| 424 | Yes         | 7       | 7-A  | 100    | McF_6 | 0   | unif   | singleC     | CBN, CBN-A           |
| 425 | Yes         | 7       | 7-A  | 100    | McF_6 | 0   | unif   | wholeT_0.01 | CBN, CBN-A, OT, OT-A |
| 426 | Yes         | 7       | 7-A  | 100    | McF_6 | 0   | unif   | wholeT_0.5  | CBN-A                |
| 427 | Yes         | 7       | 7-A  | 100    | McF_6 | Inf | last   | singleC     | CBN, CBN-A, OT-A     |
| 428 | Yes         | 7       | 7-A  | 100    | McF_6 | Inf | last   | wholeT_0.01 | OT-A                 |
| 429 | Yes         | 7       | 7-A  | 100    | McF_6 | Inf | last   | wholeT_0.5  | CBN-A, OT-A          |
| 430 | Yes         | 7       | 7-A  | 100    | McF_6 | Inf | unif   | singleC     | CBN-A                |
| 431 | Yes         | 7       | 7-A  | 100    | McF_6 | Inf | unif   | wholeT_0.01 | CBN-A                |
| 432 | Yes         | 7       | 7-A  | 100    | McF_6 | Inf | unif   | wholeT_0.5  | CBN-A                |
| 433 | No          | 11      | 11-B | 1000   | Bozic | 0   | last   | singleC     | CBN, CBN-A, OT, OT-A |
| 434 | No          | 11      | 11-B | 1000   | Bozic | 0   | last   | wholeT_0.01 | OT, OT-A             |
| 435 | No          | 11      | 11-B | 1000   | Bozic | 0   | last   | wholeT_0.5  | CBN, CBN-A           |
| 436 | No          | 11      | 11-B | 1000   | Bozic | 0   | unif   | singleC     | CBN, CBN-A           |
| 437 | No          | 11      | 11-B | 1000   | Bozic | 0   | unif   | wholeT_0.01 | CBN, CBN-A           |

Table 11: (continued)

|     | Conjunction | Drivers | Tree | S.Size | Model | sh  | S.Time | S.Type      | Best method(s)       |
|-----|-------------|---------|------|--------|-------|-----|--------|-------------|----------------------|
| 438 | No          | 11      | 11-B | 1000   | Bozic | 0   | unif   | wholeT_0.5  | CBN, CBN-A           |
| 439 | No          | 11      | 11-B | 1000   | Bozic | Inf | last   | singleC     | OT, OT-A             |
| 440 | No          | 11      | 11-B | 1000   | Bozic | Inf | last   | wholeT_0.01 | CBN, CBN-A, OT, OT-A |
| 441 | No          | 11      | 11-B | 1000   | Bozic | Inf | last   | wholeT_0.5  | CBN, OT, OT-A        |
| 442 | No          | 11      | 11-B | 1000   | Bozic | Inf | unif   | singleC     | CBN, CBN-A           |
| 443 | No          | 11      | 11-B | 1000   | Bozic | Inf | unif   | wholeT_0.01 | CBN, CBN-A, OT, OT-A |
| 444 | No          | 11      | 11-B | 1000   | Bozic | Inf | unif   | wholeT_0.5  | CBN, CBN-A, OT, OT-A |
| 445 | No          | 11      | 11-B | 1000   | exp   | 0   | last   | singleC     | CBN, CBN-A           |
| 446 | No          | 11      | 11-B | 1000   | exp   | 0   | last   | wholeT_0.01 | CBN, CBN-A           |
| 447 | No          | 11      | 11-B | 1000   | exp   | 0   | last   | wholeT_0.5  | CBN, CBN-A           |
| 448 | No          | 11      | 11-B | 1000   | exp   | 0   | unif   | singleC     | CBN, CBN-A           |
| 449 | No          | 11      | 11-B | 1000   | exp   | 0   | unif   | wholeT_0.01 | CBN, CBN-A           |
| 450 | No          | 11      | 11-B | 1000   | exp   | 0   | unif   | wholeT_0.5  | CBN, CBN-A           |
| 451 | No          | 11      | 11-B | 1000   | exp   | Inf | last   | singleC     | CBN, CBN-A, OT, OT-A |
| 452 | No          | 11      | 11-B | 1000   | exp   | Inf | last   | wholeT_0.01 | CBN, CBN-A, OT, OT-A |
| 453 | No          | 11      | 11-B | 1000   | exp   | Inf | last   | wholeT_0.5  | CBN-A, OT, OT-A      |
| 454 | No          | 11      | 11-B | 1000   | exp   | Inf | unif   | singleC     | CBN, CBN-A           |
| 455 | No          | 11      | 11-B | 1000   | exp   | Inf | unif   | wholeT_0.01 | CBN, CBN-A           |
| 456 | No          | 11      | 11-B | 1000   | exp   | Inf | unif   | wholeT_0.5  | CBN, CBN-A           |
| 457 | No          | 11      | 11-B | 1000   | McF_4 | 0   | last   | singleC     | OT, OT-A             |
| 458 | No          | 11      | 11-B | 1000   | McF_4 | 0   | last   | wholeT_0.01 | DiP, DiP-A, OT, OT-A |
| 459 | No          | 11      | 11-B | 1000   | McF_4 | 0   | last   | wholeT_0.5  | OT, OT-A             |
| 460 | No          | 11      | 11-B | 1000   | McF_4 | 0   | unif   | singleC     | OT, OT-A             |
| 461 | No          | 11      | 11-B | 1000   | McF_4 | 0   | unif   | wholeT_0.01 | CBN-A, OT, OT-A      |
| 462 | No          | 11      | 11-B | 1000   | McF_4 | 0   | unif   | wholeT_0.5  | CBN, OT, OT-A        |
| 463 | No          | 11      | 11-B | 1000   | McF_4 | Inf | last   | singleC     | OT, OT-A             |
| 464 | No          | 11      | 11-B | 1000   | McF_4 | Inf | last   | wholeT_0.01 | OT, OT-A             |
| 465 | No          | 11      | 11-B | 1000   | McF_4 | Inf | last   | wholeT_0.5  | CBN-A, OT, OT-A      |
| 466 | No          | 11      | 11-B | 1000   | McF_4 | Inf | unif   | singleC     | CBN, CBN-A, OT, OT-A |
| 467 | No          | 11      | 11-B | 1000   | McF_4 | Inf | unif   | wholeT_0.01 | CBN, CBN-A, OT, OT-A |
| 468 | No          | 11      | 11-B | 1000   | McF_4 | Inf | unif   | wholeT_0.5  | CBN, CBN-A, OT, OT-A |
| 469 | No          | 11      | 11-B | 1000   | McF_6 | 0   | last   | singleC     | DiP, DiP-A, OT, OT-A |
| 470 | No          | 11      | 11-B | 1000   | McF_6 | 0   | last   | wholeT_0.01 | DiP, DiP-A, OT, OT-A |
| 471 | No          | 11      | 11-B | 1000   | McF_6 | 0   | last   | wholeT_0.5  | DiP, DiP-A, OT, OT-A |
| 472 | No          | 11      | 11-B | 1000   | McF_6 | 0   | unif   | singleC     | DiP, DiP-A, OT, OT-A |
| 473 | No          | 11      | 11-B | 1000   | McF_6 | 0   | unif   | wholeT_0.01 | DiP, DiP-A, OT, OT-A |
| 474 | No          | 11      | 11-B | 1000   | McF_6 | 0   | unif   | wholeT_0.5  | DiP, DiP-A, OT, OT-A |
| 475 | No          | 11      | 11-B | 1000   | McF_6 | Inf | last   | singleC     | DiP, DiP-A, OT, OT-A |
| 476 | No          | 11      | 11-B | 1000   | McF_6 | Inf | last   | wholeT_0.01 | DiP-A, OT, OT-A      |
| 477 | No          | 11      | 11-B | 1000   | McF_6 | Inf | last   | wholeT_0.5  | DiP, DiP-A, OT, OT-A |

Table 11: (continued)

|     | Conjunction | Drivers | Tree | S.Size | Model | sh  | S.Time | S.Type      | Best method(s)       |
|-----|-------------|---------|------|--------|-------|-----|--------|-------------|----------------------|
| 478 | No          | 11      | 11-B | 1000   | McF_6 | Inf | unif   | singleC     | DiP, DiP-A, OT       |
| 479 | No          | 11      | 11-B | 1000   | McF_6 | Inf | unif   | wholeT_0.01 | DiP, DiP-A, OT, OT-A |
| 480 | No          | 11      | 11-B | 1000   | McF_6 | Inf | unif   | wholeT_0.5  | DiP, DiP-A, OT, OT-A |
| 481 | No          | 11      | 11-B | 200    | Bozic | 0   | last   | singleC     | CBN, CBN-A           |
| 482 | No          | 11      | 11-B | 200    | Bozic | 0   | last   | wholeT_0.01 | CBN, CBN-A           |
| 483 | No          | 11      | 11-B | 200    | Bozic | 0   | last   | wholeT_0.5  | CBN, CBN-A           |
| 484 | No          | 11      | 11-B | 200    | Bozic | 0   | unif   | singleC     | CBN, CBN-A           |
| 485 | No          | 11      | 11-B | 200    | Bozic | 0   | unif   | wholeT_0.01 | CBN, CBN-A           |
| 486 | No          | 11      | 11-B | 200    | Bozic | 0   | unif   | wholeT_0.5  | CBN, CBN-A           |
| 487 | No          | 11      | 11-B | 200    | Bozic | Inf | last   | singleC     | CBN, CBN-A, OT, OT-A |
| 488 | No          | 11      | 11-B | 200    | Bozic | Inf | last   | wholeT_0.01 | CBN, CBN-A, OT, OT-A |
| 489 | No          | 11      | 11-B | 200    | Bozic | Inf | last   | wholeT_0.5  | CBN, CBN-A, OT, OT-A |
| 490 | No          | 11      | 11-B | 200    | Bozic | Inf | unif   | singleC     | CBN, CBN-A           |
| 491 | No          | 11      | 11-B | 200    | Bozic | Inf | unif   | wholeT_0.01 | CBN, CBN-A           |
| 492 | No          | 11      | 11-B | 200    | Bozic | Inf | unif   | wholeT_0.5  | CBN, CBN-A           |
| 493 | No          | 11      | 11-B | 200    | exp   | 0   | last   | singleC     | CBN, CBN-A           |
| 494 | No          | 11      | 11-B | 200    | exp   | 0   | last   | wholeT_0.01 | CBN, CBN-A           |
| 495 | No          | 11      | 11-B | 200    | exp   | 0   | last   | wholeT_0.5  | CBN, CBN-A           |
| 496 | No          | 11      | 11-B | 200    | exp   | 0   | unif   | singleC     | CBN, CBN-A           |
| 497 | No          | 11      | 11-B | 200    | exp   | 0   | unif   | wholeT_0.01 | CBN, CBN-A           |
| 498 | No          | 11      | 11-B | 200    | exp   | 0   | unif   | wholeT_0.5  | CBN, CBN-A           |
| 499 | No          | 11      | 11-B | 200    | exp   | Inf | last   | singleC     | CBN, CBN-A, OT, OT-A |
| 500 | No          | 11      | 11-B | 200    | exp   | Inf | last   | wholeT_0.01 | CBN, CBN-A           |
| 501 | No          | 11      | 11-B | 200    | exp   | Inf | last   | wholeT_0.5  | CBN, CBN-A, OT, OT-A |
| 502 | No          | 11      | 11-B | 200    | exp   | Inf | unif   | singleC     | CBN, CBN-A           |
| 503 | No          | 11      | 11-B | 200    | exp   | Inf | unif   | wholeT_0.01 | CBN, CBN-A           |
| 504 | No          | 11      | 11-B | 200    | exp   | Inf | unif   | wholeT_0.5  | CBN, CBN-A           |
| 505 | No          | 11      | 11-B | 200    | McF_4 | 0   | last   | singleC     | OT, OT-A             |
| 506 | No          | 11      | 11-B | 200    | McF_4 | 0   | last   | wholeT_0.01 | OT, OT-A             |
| 507 | No          | 11      | 11-B | 200    | McF_4 | 0   | last   | wholeT_0.5  | OT, OT-A             |
| 508 | No          | 11      | 11-B | 200    | McF_4 | 0   | unif   | singleC     | CBN, CBN-A           |
| 509 | No          | 11      | 11-B | 200    | McF_4 | 0   | unif   | wholeT_0.01 | CBN, CBN-A, OT, OT-A |
| 510 | No          | 11      | 11-B | 200    | McF_4 | 0   | unif   | wholeT_0.5  | CBN, CBN-A           |
| 511 | No          | 11      | 11-B | 200    | McF_4 | Inf | last   | singleC     | CBN, CBN-A, OT, OT-A |
| 512 | No          | 11      | 11-B | 200    | McF_4 | Inf | last   | wholeT_0.01 | OT, OT-A             |
| 513 | No          | 11      | 11-B | 200    | McF_4 | Inf | last   | wholeT_0.5  | CBN, OT, OT-A        |
| 514 | No          | 11      | 11-B | 200    | McF_4 | Inf | unif   | singleC     | CBN, CBN-A, OT-A     |
| 515 | No          | 11      | 11-B | 200    | McF_4 | Inf | unif   | wholeT_0.01 | CBN, CBN-A, OT, OT-A |
| 516 | No          | 11      | 11-B | 200    | McF_4 | Inf | unif   | wholeT_0.5  | CBN, CBN-A           |
| 517 | No          | 11      | 11-B | 200    | McF_6 | 0   | last   | singleC     | OT, OT-A             |

Table 11: (continued)

|     | Conjunction | Drivers | Tree | S.Size | Model | sh  | S.Time | S.Type      | Best method(s)       |
|-----|-------------|---------|------|--------|-------|-----|--------|-------------|----------------------|
| 518 | No          | 11      | 11-B | 200    | McF_6 | 0   | last   | wholeT_0.01 | OT, OT-A             |
| 519 | No          | 11      | 11-B | 200    | McF_6 | 0   | last   | wholeT_0.5  | OT, OT-A             |
| 520 | No          | 11      | 11-B | 200    | McF_6 | 0   | unif   | singleC     | OT, OT-A             |
| 521 | No          | 11      | 11-B | 200    | McF_6 | 0   | unif   | wholeT_0.01 | CBN-A, OT, OT-A      |
| 522 | No          | 11      | 11-B | 200    | McF_6 | 0   | unif   | wholeT_0.5  | OT, OT-A             |
| 523 | No          | 11      | 11-B | 200    | McF_6 | Inf | last   | singleC     | OT, OT-A             |
| 524 | No          | 11      | 11-B | 200    | McF_6 | Inf | last   | wholeT_0.01 | OT, OT-A             |
| 525 | No          | 11      | 11-B | 200    | McF_6 | Inf | last   | wholeT_0.5  | OT, OT-A             |
| 526 | No          | 11      | 11-B | 200    | McF_6 | Inf | unif   | singleC     | OT, OT-A             |
| 527 | No          | 11      | 11-B | 200    | McF_6 | Inf | unif   | wholeT_0.01 | OT, OT-A             |
| 528 | No          | 11      | 11-B | 200    | McF_6 | Inf | unif   | wholeT_0.5  | OT, OT-A             |
| 529 | No          | 11      | 11-B | 100    | Bozic | 0   | last   | singleC     | CBN, CBN-A           |
| 530 | No          | 11      | 11-B | 100    | Bozic | 0   | last   | wholeT_0.01 | CBN, CBN-A           |
| 531 | No          | 11      | 11-B | 100    | Bozic | 0   | last   | wholeT_0.5  | CBN, CBN-A           |
| 532 | No          | 11      | 11-B | 100    | Bozic | 0   | unif   | singleC     | CBN, CBN-A           |
| 533 | No          | 11      | 11-B | 100    | Bozic | 0   | unif   | wholeT_0.01 | CBN, CBN-A           |
| 534 | No          | 11      | 11-B | 100    | Bozic | 0   | unif   | wholeT_0.5  | CBN, CBN-A           |
| 535 | No          | 11      | 11-B | 100    | Bozic | Inf | last   | singleC     | CBN, CBN-A, OT, OT-A |
| 536 | No          | 11      | 11-B | 100    | Bozic | Inf | last   | wholeT_0.01 | CBN, CBN-A, OT       |
| 537 | No          | 11      | 11-B | 100    | Bozic | Inf | last   | wholeT_0.5  | CBN, CBN-A, OT, OT-A |
| 538 | No          | 11      | 11-B | 100    | Bozic | Inf | unif   | singleC     | CBN, CBN-A           |
| 539 | No          | 11      | 11-B | 100    | Bozic | Inf | unif   | wholeT_0.01 | CBN, CBN-A           |
| 540 | No          | 11      | 11-B | 100    | Bozic | Inf | unif   | wholeT_0.5  | CBN, CBN-A           |
| 541 | No          | 11      | 11-B | 100    | exp   | 0   | last   | singleC     | CBN, CBN-A           |
| 542 | No          | 11      | 11-B | 100    | exp   | 0   | last   | wholeT_0.01 | CBN, CBN-A           |
| 543 | No          | 11      | 11-B | 100    | exp   | 0   | last   | wholeT_0.5  | CBN, CBN-A           |
| 544 | No          | 11      | 11-B | 100    | exp   | 0   | unif   | singleC     | CBN, CBN-A           |
| 545 | No          | 11      | 11-B | 100    | exp   | 0   | unif   | wholeT_0.01 | CBN, CBN-A           |
| 546 | No          | 11      | 11-B | 100    | exp   | 0   | unif   | wholeT_0.5  | CBN, CBN-A           |
| 547 | No          | 11      | 11-B | 100    | exp   | Inf | last   | singleC     | CBN, CBN-A           |
| 548 | No          | 11      | 11-B | 100    | exp   | Inf | last   | wholeT_0.01 | CBN, CBN-A           |
| 549 | No          | 11      | 11-B | 100    | exp   | Inf | last   | wholeT_0.5  | CBN, CBN-A           |
| 550 | No          | 11      | 11-B | 100    | exp   | Inf | unif   | singleC     | CBN, CBN-A           |
| 551 | No          | 11      | 11-B | 100    | exp   | Inf | unif   | wholeT_0.01 | CBN, CBN-A           |
| 552 | No          | 11      | 11-B | 100    | exp   | Inf | unif   | wholeT_0.5  | CBN, CBN-A           |
| 553 | No          | 11      | 11-B | 100    | McF_4 | 0   | last   | singleC     | CBN-A, OT-A          |
| 554 | No          | 11      | 11-B | 100    | McF_4 | 0   | last   | wholeT_0.01 | OT, OT-A             |
| 555 | No          | 11      | 11-B | 100    | McF_4 | 0   | last   | wholeT_0.5  | CBN-A, OT, OT-A      |
| 556 | No          | 11      | 11-B | 100    | McF_4 | 0   | unif   | singleC     | CBN, CBN-A           |
| 557 | No          | 11      | 11-B | 100    | McF_4 | 0   | unif   | wholeT_0.01 | CBN, CBN-A           |

Table 11: (continued)

|     | Conjunction | Drivers | Tree | S.Size | Model | sh  | S.Time | S.Type      | Best method(s)       |
|-----|-------------|---------|------|--------|-------|-----|--------|-------------|----------------------|
| 558 | No          | 11      | 11-B | 100    | McF_4 | 0   | unif   | wholeT_0.5  | CBN, CBN-A           |
| 559 | No          | 11      | 11-B | 100    | McF_4 | Inf | last   | singleC     | CBN, CBN-A, OT, OT-A |
| 560 | No          | 11      | 11-B | 100    | McF_4 | Inf | last   | wholeT_0.01 | OT, OT-A             |
| 561 | No          | 11      | 11-B | 100    | McF_4 | Inf | last   | wholeT_0.5  | CBN-A, OT, OT-A      |
| 562 | No          | 11      | 11-B | 100    | McF_4 | Inf | unif   | singleC     | CBN, CBN-A           |
| 563 | No          | 11      | 11-B | 100    | McF_4 | Inf | unif   | wholeT_0.01 | CBN, CBN-A           |
| 564 | No          | 11      | 11-B | 100    | McF_4 | Inf | unif   | wholeT_0.5  | CBN, CBN-A           |
| 565 | No          | 11      | 11-B | 100    | McF_6 | 0   | last   | singleC     | OT, OT-A             |
| 566 | No          | 11      | 11-B | 100    | McF_6 | 0   | last   | wholeT_0.01 | OT, OT-A             |
| 567 | No          | 11      | 11-B | 100    | McF_6 | 0   | last   | wholeT_0.5  | OT, OT-A             |
| 568 | No          | 11      | 11-B | 100    | McF_6 | 0   | unif   | singleC     | CBN-A, OT, OT-A      |
| 569 | No          | 11      | 11-B | 100    | McF_6 | 0   | unif   | wholeT_0.01 | OT, OT-A             |
| 570 | No          | 11      | 11-B | 100    | McF_6 | 0   | unif   | wholeT_0.5  | OT, OT-A             |
| 571 | No          | 11      | 11-B | 100    | McF_6 | Inf | last   | singleC     | OT, OT-A             |
| 572 | No          | 11      | 11-B | 100    | McF_6 | Inf | last   | wholeT_0.01 | OT, OT-A             |
| 573 | No          | 11      | 11-B | 100    | McF_6 | Inf | last   | wholeT_0.5  | OT, OT-A             |
| 574 | No          | 11      | 11-B | 100    | McF_6 | Inf | unif   | singleC     | CBN, CBN-A, OT, OT-A |
| 575 | No          | 11      | 11-B | 100    | McF_6 | Inf | unif   | wholeT_0.01 | CBN, CBN-A, OT, OT-A |
| 576 | No          | 11      | 11-B | 100    | McF_6 | Inf | unif   | wholeT_0.5  | CBN, CBN-A, OT, OT-A |
| 577 | No          | 9       | 9-B  | 1000   | Bozic | 0   | last   | singleC     | CBN, CBN-A, OT, OT-A |
| 578 | No          | 9       | 9-B  | 1000   | Bozic | 0   | last   | wholeT_0.01 | OT, OT-A             |
| 579 | No          | 9       | 9-B  | 1000   | Bozic | 0   | last   | wholeT_0.5  | CBN, CBN-A, OT, OT-A |
| 580 | No          | 9       | 9-B  | 1000   | Bozic | 0   | unif   | singleC     | CBN, CBN-A           |
| 581 | No          | 9       | 9-B  | 1000   | Bozic | 0   | unif   | wholeT_0.01 | CBN, CBN-A           |
| 582 | No          | 9       | 9-B  | 1000   | Bozic | 0   | unif   | wholeT_0.5  | CBN, CBN-A           |
| 583 | No          | 9       | 9-B  | 1000   | Bozic | Inf | last   | singleC     | OT, OT-A             |
| 584 | No          | 9       | 9-B  | 1000   | Bozic | Inf | last   | wholeT_0.01 | DiP, DiP-A, OT, OT-A |
| 585 | No          | 9       | 9-B  | 1000   | Bozic | Inf | last   | wholeT_0.5  | OT, OT-A             |
| 586 | No          | 9       | 9-B  | 1000   | Bozic | Inf | unif   | singleC     | CBN, OT, OT-A        |
| 587 | No          | 9       | 9-B  | 1000   | Bozic | Inf | unif   | wholeT_0.01 | CBN-A, OT, OT-A      |
| 588 | No          | 9       | 9-B  | 1000   | Bozic | Inf | unif   | wholeT_0.5  | CBN, CBN-A, OT, OT-A |
| 589 | No          | 9       | 9-B  | 1000   | exp   | 0   | last   | singleC     | CBN, CBN-A           |
| 590 | No          | 9       | 9-B  | 1000   | exp   | 0   | last   | wholeT_0.01 | CBN, CBN-A           |
| 591 | No          | 9       | 9-B  | 1000   | exp   | 0   | last   | wholeT_0.5  | CBN, CBN-A           |
| 592 | No          | 9       | 9-B  | 1000   | exp   | 0   | unif   | singleC     | CBN, CBN-A           |
| 593 | No          | 9       | 9-B  | 1000   | exp   | 0   | unif   | wholeT_0.01 | CBN, CBN-A           |
| 594 | No          | 9       | 9-B  | 1000   | exp   | 0   | unif   | wholeT_0.5  | CBN, CBN-A           |
| 595 | No          | 9       | 9-B  | 1000   | exp   | Inf | last   | singleC     | OT, OT-A             |
| 596 | No          | 9       | 9-B  | 1000   | exp   | Inf | last   | wholeT_0.01 | OT, OT-A             |
| 597 | No          | 9       | 9-B  | 1000   | exp   | Inf | last   | wholeT_0.5  | OT, OT-A             |

Table 11: (continued)

|     | Conjunction | Drivers | Tree | S.Size | Model | sh  | S.Time | S.Type      | Best method(s)       |
|-----|-------------|---------|------|--------|-------|-----|--------|-------------|----------------------|
| 598 | No          | 9       | 9-B  | 1000   | exp   | Inf | unif   | singleC     | CBN, CBN-A, OT, OT-A |
| 599 | No          | 9       | 9-B  | 1000   | exp   | Inf | unif   | wholeT_0.01 | CBN, CBN-A, OT, OT-A |
| 600 | No          | 9       | 9-B  | 1000   | exp   | Inf | unif   | wholeT_0.5  | CBN, CBN-A           |
| 601 | No          | 9       | 9-B  | 1000   | McF_4 | 0   | last   | singleC     | DiP-A, OT, OT-A      |
| 602 | No          | 9       | 9-B  | 1000   | McF_4 | 0   | last   | wholeT_0.01 | DiP, DiP-A, OT, OT-A |
| 603 | No          | 9       | 9-B  | 1000   | McF_4 | 0   | last   | wholeT_0.5  | OT, OT-A             |
| 604 | No          | 9       | 9-B  | 1000   | McF_4 | 0   | unif   | singleC     | OT, OT-A             |
| 605 | No          | 9       | 9-B  | 1000   | McF_4 | 0   | unif   | wholeT_0.01 | OT, OT-A             |
| 606 | No          | 9       | 9-B  | 1000   | McF_4 | 0   | unif   | wholeT_0.5  | OT, OT-A             |
| 607 | No          | 9       | 9-B  | 1000   | McF_4 | Inf | last   | singleC     | OT, OT-A             |
| 608 | No          | 9       | 9-B  | 1000   | McF_4 | Inf | last   | wholeT_0.01 | DiP, DiP-A, OT, OT-A |
| 609 | No          | 9       | 9-B  | 1000   | McF_4 | Inf | last   | wholeT_0.5  | OT, OT-A             |
| 610 | No          | 9       | 9-B  | 1000   | McF_4 | Inf | unif   | singleC     | OT, OT-A             |
| 611 | No          | 9       | 9-B  | 1000   | McF_4 | Inf | unif   | wholeT_0.01 | OT, OT-A             |
| 612 | No          | 9       | 9-B  | 1000   | McF_4 | Inf | unif   | wholeT_0.5  | OT, OT-A             |
| 613 | No          | 9       | 9-B  | 1000   | McF_6 | 0   | last   | singleC     | DiP-A, OT-A          |
| 614 | No          | 9       | 9-B  | 1000   | McF_6 | 0   | last   | wholeT_0.01 | DiP-A, OT-A          |
| 615 | No          | 9       | 9-B  | 1000   | McF_6 | 0   | last   | wholeT_0.5  | DiP-A, OT-A          |
| 616 | No          | 9       | 9-B  | 1000   | McF_6 | 0   | unif   | singleC     | DiP, DiP-A, OT, OT-A |
| 617 | No          | 9       | 9-B  | 1000   | McF_6 | 0   | unif   | wholeT_0.01 | DiP, DiP-A, OT, OT-A |
| 618 | No          | 9       | 9-B  | 1000   | McF_6 | 0   | unif   | wholeT_0.5  | none                 |
| 619 | No          | 9       | 9-B  | 1000   | McF_6 | Inf | last   | singleC     | DiP-A, OT-A          |
| 620 | No          | 9       | 9-B  | 1000   | McF_6 | Inf | last   | wholeT_0.01 | DiP-A, OT-A          |
| 621 | No          | 9       | 9-B  | 1000   | McF_6 | Inf | last   | wholeT_0.5  | DiP-A, OT-A          |
| 622 | No          | 9       | 9-B  | 1000   | McF_6 | Inf | unif   | singleC     | DiP, DiP-A, OT, OT-A |
| 623 | No          | 9       | 9-B  | 1000   | McF_6 | Inf | unif   | wholeT_0.01 | DiP, DiP-A, OT, OT-A |
| 624 | No          | 9       | 9-B  | 1000   | McF_6 | Inf | unif   | wholeT_0.5  | DiP, DiP-A, OT, OT-A |
| 625 | No          | 9       | 9-B  | 200    | Bozic | 0   | last   | singleC     | CBN, CBN-A, OT, OT-A |
| 626 | No          | 9       | 9-B  | 200    | Bozic | 0   | last   | wholeT_0.01 | CBN, CBN-A, OT       |
| 627 | No          | 9       | 9-B  | 200    | Bozic | 0   | last   | wholeT_0.5  | CBN, CBN-A           |
| 628 | No          | 9       | 9-B  | 200    | Bozic | 0   | unif   | singleC     | CBN, CBN-A           |
| 629 | No          | 9       | 9-B  | 200    | Bozic | 0   | unif   | wholeT_0.01 | CBN, CBN-A           |
| 630 | No          | 9       | 9-B  | 200    | Bozic | 0   | unif   | wholeT_0.5  | CBN, CBN-A           |
| 631 | No          | 9       | 9-B  | 200    | Bozic | Inf | last   | singleC     | OT, OT-A             |
| 632 | No          | 9       | 9-B  | 200    | Bozic | Inf | last   | wholeT_0.01 | CBN, OT, OT-A        |
| 633 | No          | 9       | 9-B  | 200    | Bozic | Inf | last   | wholeT_0.5  | OT, OT-A             |
| 634 | No          | 9       | 9-B  | 200    | Bozic | Inf | unif   | singleC     | CBN, CBN-A           |
| 635 | No          | 9       | 9-B  | 200    | Bozic | Inf | unif   | wholeT_0.01 | CBN-A                |
| 636 | No          | 9       | 9-B  | 200    | Bozic | Inf | unif   | wholeT_0.5  | CBN, CBN-A           |
| 637 | No          | 9       | 9-B  | 200    | exp   | 0   | last   | singleC     | CBN, CBN-A           |



Table 11: (continued)

|     | Conjunction | Drivers | Tree | S.Size | Model | sh  | S.Time | S.Type      | Best method(s)       |
|-----|-------------|---------|------|--------|-------|-----|--------|-------------|----------------------|
| 638 | No          | 9       | 9-B  | 200    | exp   | 0   | last   | wholeT_0.01 | CBN, CBN-A           |
| 639 | No          | 9       | 9-B  | 200    | exp   | 0   | last   | wholeT_0.5  | CBN, CBN-A           |
| 640 | No          | 9       | 9-B  | 200    | exp   | 0   | unif   | singleC     | CBN, CBN-A           |
| 641 | No          | 9       | 9-B  | 200    | exp   | 0   | unif   | wholeT_0.01 | CBN, CBN-A           |
| 642 | No          | 9       | 9-B  | 200    | exp   | 0   | unif   | wholeT_0.5  | CBN, CBN-A           |
| 643 | No          | 9       | 9-B  | 200    | exp   | Inf | last   | singleC     | CBN, CBN-A, OT, OT-A |
| 644 | No          | 9       | 9-B  | 200    | exp   | Inf | last   | wholeT_0.01 | OT, OT-A             |
| 645 | No          | 9       | 9-B  | 200    | exp   | Inf | last   | wholeT_0.5  | CBN, CBN-A, OT, OT-A |
| 646 | No          | 9       | 9-B  | 200    | exp   | Inf | unif   | singleC     | CBN, CBN-A           |
| 647 | No          | 9       | 9-B  | 200    | exp   | Inf | unif   | wholeT_0.01 | CBN, CBN-A           |
| 648 | No          | 9       | 9-B  | 200    | exp   | Inf | unif   | wholeT_0.5  | CBN, CBN-A           |
| 649 | No          | 9       | 9-B  | 200    | McF_4 | 0   | last   | singleC     | OT, OT-A             |
| 650 | No          | 9       | 9-B  | 200    | McF_4 | 0   | last   | wholeT_0.01 | OT, OT-A             |
| 651 | No          | 9       | 9-B  | 200    | McF_4 | 0   | last   | wholeT_0.5  | OT, OT-A             |
| 652 | No          | 9       | 9-B  | 200    | McF_4 | 0   | unif   | singleC     | CBN, CBN-A, OT, OT-A |
| 653 | No          | 9       | 9-B  | 200    | McF_4 | 0   | unif   | wholeT_0.01 | CBN, OT, OT-A        |
| 654 | No          | 9       | 9-B  | 200    | McF_4 | 0   | unif   | wholeT_0.5  | CBN, CBN-A, OT, OT-A |
| 655 | No          | 9       | 9-B  | 200    | McF_4 | Inf | last   | singleC     | OT, OT-A             |
| 656 | No          | 9       | 9-B  | 200    | McF_4 | Inf | last   | wholeT_0.01 | OT, OT-A             |
| 657 | No          | 9       | 9-B  | 200    | McF_4 | Inf | last   | wholeT_0.5  | OT, OT-A             |
| 658 | No          | 9       | 9-B  | 200    | McF_4 | Inf | unif   | singleC     | CBN, CBN-A, OT, OT-A |
| 659 | No          | 9       | 9-B  | 200    | McF_4 | Inf | unif   | wholeT_0.01 | CBN, CBN-A, OT, OT-A |
| 660 | No          | 9       | 9-B  | 200    | McF_4 | Inf | unif   | wholeT_0.5  | CBN, CBN-A, OT, OT-A |
| 661 | No          | 9       | 9-B  | 200    | McF_6 | 0   | last   | singleC     | OT-A                 |
| 662 | No          | 9       | 9-B  | 200    | McF_6 | 0   | last   | wholeT_0.01 | OT-A                 |
| 663 | No          | 9       | 9-B  | 200    | McF_6 | 0   | last   | wholeT_0.5  | OT-A                 |
| 664 | No          | 9       | 9-B  | 200    | McF_6 | 0   | unif   | singleC     | CBN-A, OT, OT-A      |
| 665 | No          | 9       | 9-B  | 200    | McF_6 | 0   | unif   | wholeT_0.01 | OT, OT-A             |
| 666 | No          | 9       | 9-B  | 200    | McF_6 | 0   | unif   | wholeT_0.5  | OT, OT-A             |
| 667 | No          | 9       | 9-B  | 200    | McF_6 | Inf | last   | singleC     | OT-A                 |
| 668 | No          | 9       | 9-B  | 200    | McF_6 | Inf | last   | wholeT_0.01 | OT-A                 |
| 669 | No          | 9       | 9-B  | 200    | McF_6 | Inf | last   | wholeT_0.5  | OT-A                 |
| 670 | No          | 9       | 9-B  | 200    | McF_6 | Inf | unif   | singleC     | OT, OT-A             |
| 671 | No          | 9       | 9-B  | 200    | McF_6 | Inf | unif   | wholeT_0.01 | OT, OT-A             |
| 672 | No          | 9       | 9-B  | 200    | McF_6 | Inf | unif   | wholeT_0.5  | OT, OT-A             |
| 673 | No          | 9       | 9-B  | 100    | Bozic | 0   | last   | singleC     | CBN, CBN-A           |
| 674 | No          | 9       | 9-B  | 100    | Bozic | 0   | last   | wholeT_0.01 | CBN, CBN-A           |
| 675 | No          | 9       | 9-B  | 100    | Bozic | 0   | last   | wholeT_0.5  | CBN, CBN-A           |
| 676 | No          | 9       | 9-B  | 100    | Bozic | 0   | unif   | singleC     | CBN, CBN-A           |
| 677 | No          | 9       | 9-B  | 100    | Bozic | 0   | unif   | wholeT_0.01 | CBN, CBN-A           |

Table 11: (continued)

|     | Conjunction | Drivers | Tree | S.Size | Model | sh  | S.Time | S.Type      | Best method(s)       |
|-----|-------------|---------|------|--------|-------|-----|--------|-------------|----------------------|
| 678 | No          | 9       | 9-B  | 100    | Bozic | 0   | unif   | wholeT_0.5  | CBN, CBN-A           |
| 679 | No          | 9       | 9-B  | 100    | Bozic | Inf | last   | singleC     | CBN-A, OT, OT-A      |
| 680 | No          | 9       | 9-B  | 100    | Bozic | Inf | last   | wholeT_0.01 | OT, OT-A             |
| 681 | No          | 9       | 9-B  | 100    | Bozic | Inf | last   | wholeT_0.5  | CBN, CBN-A, OT, OT-A |
| 682 | No          | 9       | 9-B  | 100    | Bozic | Inf | unif   | singleC     | CBN, CBN-A           |
| 683 | No          | 9       | 9-B  | 100    | Bozic | Inf | unif   | wholeT_0.01 | CBN, CBN-A           |
| 684 | No          | 9       | 9-B  | 100    | Bozic | Inf | unif   | wholeT_0.5  | CBN, CBN-A           |
| 685 | No          | 9       | 9-B  | 100    | exp   | 0   | last   | singleC     | CBN, CBN-A           |
| 686 | No          | 9       | 9-B  | 100    | exp   | 0   | last   | wholeT_0.01 | CBN, CBN-A           |
| 687 | No          | 9       | 9-B  | 100    | exp   | 0   | last   | wholeT_0.5  | CBN, CBN-A           |
| 688 | No          | 9       | 9-B  | 100    | exp   | 0   | unif   | singleC     | CBN, CBN-A           |
| 689 | No          | 9       | 9-B  | 100    | exp   | 0   | unif   | wholeT_0.01 | CBN, CBN-A           |
| 690 | No          | 9       | 9-B  | 100    | exp   | 0   | unif   | wholeT_0.5  | CBN, CBN-A           |
| 691 | No          | 9       | 9-B  | 100    | exp   | Inf | last   | singleC     | CBN, CBN-A           |
| 692 | No          | 9       | 9-B  | 100    | exp   | Inf | last   | wholeT_0.01 | CBN, CBN-A, OT, OT-A |
| 693 | No          | 9       | 9-B  | 100    | exp   | Inf | last   | wholeT_0.5  | CBN, CBN-A           |
| 694 | No          | 9       | 9-B  | 100    | exp   | Inf | unif   | singleC     | CBN, CBN-A           |
| 695 | No          | 9       | 9-B  | 100    | exp   | Inf | unif   | wholeT_0.01 | CBN, CBN-A           |
| 696 | No          | 9       | 9-B  | 100    | exp   | Inf | unif   | wholeT_0.5  | CBN, CBN-A           |
| 697 | No          | 9       | 9-B  | 100    | McF_4 | 0   | last   | singleC     | OT, OT-A             |
| 698 | No          | 9       | 9-B  | 100    | McF_4 | 0   | last   | wholeT_0.01 | OT, OT-A             |
| 699 | No          | 9       | 9-B  | 100    | McF_4 | 0   | last   | wholeT_0.5  | OT, OT-A             |
| 700 | No          | 9       | 9-B  | 100    | McF_4 | 0   | unif   | singleC     | CBN, CBN-A, OT, OT-A |
| 701 | No          | 9       | 9-B  | 100    | McF_4 | 0   | unif   | wholeT_0.01 | CBN, CBN-A, OT, OT-A |
| 702 | No          | 9       | 9-B  | 100    | McF_4 | 0   | unif   | wholeT_0.5  | CBN, CBN-A           |
| 703 | No          | 9       | 9-B  | 100    | McF_4 | Inf | last   | singleC     | OT, OT-A             |
| 704 | No          | 9       | 9-B  | 100    | McF_4 | Inf | last   | wholeT_0.01 | OT, OT-A             |
| 705 | No          | 9       | 9-B  | 100    | McF_4 | Inf | last   | wholeT_0.5  | OT, OT-A             |
| 706 | No          | 9       | 9-B  | 100    | McF_4 | Inf | unif   | singleC     | CBN, CBN-A, OT, OT-A |
| 707 | No          | 9       | 9-B  | 100    | McF_4 | Inf | unif   | wholeT_0.01 | CBN, CBN-A, OT, OT-A |
| 708 | No          | 9       | 9-B  | 100    | McF_4 | Inf | unif   | wholeT_0.5  | CBN, CBN-A, OT       |
| 709 | No          | 9       | 9-B  | 100    | McF_6 | 0   | last   | singleC     | OT-A                 |
| 710 | No          | 9       | 9-B  | 100    | McF_6 | 0   | last   | wholeT_0.01 | OT-A                 |
| 711 | No          | 9       | 9-B  | 100    | McF_6 | 0   | last   | wholeT_0.5  | OT-A                 |
| 712 | No          | 9       | 9-B  | 100    | McF_6 | 0   | unif   | singleC     | OT, OT-A             |
| 713 | No          | 9       | 9-B  | 100    | McF_6 | 0   | unif   | wholeT_0.01 | CBN, OT, OT-A        |
| 714 | No          | 9       | 9-B  | 100    | McF_6 | 0   | unif   | wholeT_0.5  | OT, OT-A             |
| 715 | No          | 9       | 9-B  | 100    | McF_6 | Inf | last   | singleC     | OT-A                 |
| 716 | No          | 9       | 9-B  | 100    | McF_6 | Inf | last   | wholeT_0.01 | OT-A                 |
| 717 | No          | 9       | 9-B  | 100    | McF_6 | Inf | last   | wholeT_0.5  | OT-A                 |

Table 11: (continued)

|     | Conjunction | Drivers | Tree | S.Size | Model | sh  | S.Time | S.Type      | Best method(s)              |
|-----|-------------|---------|------|--------|-------|-----|--------|-------------|-----------------------------|
| 718 | No          | 9       | 9-B  | 100    | McF_6 | Inf | unif   | singleC     | OT, OT-A                    |
| 719 | No          | 9       | 9-B  | 100    | McF_6 | Inf | unif   | wholeT_0.01 | OT, OT-A                    |
| 720 | No          | 9       | 9-B  | 100    | McF_6 | Inf | unif   | wholeT_0.5  | OT, OT-A                    |
| 721 | No          | 7       | 7-B  | 1000   | Bozic | 0   | last   | singleC     | OT-A                        |
| 722 | No          | 7       | 7-B  | 1000   | Bozic | 0   | last   | wholeT_0.01 | OT-A                        |
| 723 | No          | 7       | 7-B  | 1000   | Bozic | 0   | last   | wholeT_0.5  | OT-A                        |
| 724 | No          | 7       | 7-B  | 1000   | Bozic | 0   | unif   | singleC     | CBN, CBN-A, OT, OT-A        |
| 725 | No          | 7       | 7-B  | 1000   | Bozic | 0   | unif   | wholeT_0.01 | CBN, CBN-A, DiP-A, OT, OT-A |
| 726 | No          | 7       | 7-B  | 1000   | Bozic | 0   | unif   | wholeT_0.5  | CBN, CBN-A, OT, OT-A        |
| 727 | No          | 7       | 7-B  | 1000   | Bozic | Inf | last   | singleC     | DiP-A, OT-A                 |
| 728 | No          | 7       | 7-B  | 1000   | Bozic | Inf | last   | wholeT_0.01 | DiP-A, OT-A                 |
| 729 | No          | 7       | 7-B  | 1000   | Bozic | Inf | last   | wholeT_0.5  | DiP-A, OT-A                 |
| 730 | No          | 7       | 7-B  | 1000   | Bozic | Inf | unif   | singleC     | OT, OT-A                    |
| 731 | No          | 7       | 7-B  | 1000   | Bozic | Inf | unif   | wholeT_0.01 | CBN, CBN-A, OT, OT-A        |
| 732 | No          | 7       | 7-B  | 1000   | Bozic | Inf | unif   | wholeT_0.5  | OT, OT-A                    |
| 733 | No          | 7       | 7-B  | 1000   | exp   | 0   | last   | singleC     | CBN-A                       |
| 734 | No          | 7       | 7-B  | 1000   | exp   | 0   | last   | wholeT_0.01 | CBN, CBN-A, OT-A            |
| 735 | No          | 7       | 7-B  | 1000   | exp   | 0   | last   | wholeT_0.5  | CBN-A                       |
| 736 | No          | 7       | 7-B  | 1000   | exp   | 0   | unif   | singleC     | CBN, CBN-A                  |
| 737 | No          | 7       | 7-B  | 1000   | exp   | 0   | unif   | wholeT_0.01 | CBN, CBN-A, OT-A            |
| 738 | No          | 7       | 7-B  | 1000   | exp   | 0   | unif   | wholeT_0.5  | CBN, CBN-A                  |
| 739 | No          | 7       | 7-B  | 1000   | exp   | Inf | last   | singleC     | OT-A                        |
| 740 | No          | 7       | 7-B  | 1000   | exp   | Inf | last   | wholeT_0.01 | OT-A                        |
| 741 | No          | 7       | 7-B  | 1000   | exp   | Inf | last   | wholeT_0.5  | OT-A                        |
| 742 | No          | 7       | 7-B  | 1000   | exp   | Inf | unif   | singleC     | CBN, CBN-A, OT, OT-A        |
| 743 | No          | 7       | 7-B  | 1000   | exp   | Inf | unif   | wholeT_0.01 | CBN-A, OT, OT-A             |
| 744 | No          | 7       | 7-B  | 1000   | exp   | Inf | unif   | wholeT_0.5  | CBN, CBN-A                  |
| 745 | No          | 7       | 7-B  | 1000   | McF_4 | 0   | last   | singleC     | DiP-A, OT-A                 |
| 746 | No          | 7       | 7-B  | 1000   | McF_4 | 0   | last   | wholeT_0.01 | DiP-A, OT-A                 |
| 747 | No          | 7       | 7-B  | 1000   | McF_4 | 0   | last   | wholeT_0.5  | DiP-A                       |
| 748 | No          | 7       | 7-B  | 1000   | McF_4 | 0   | unif   | singleC     | DiP, DiP-A, OT, OT-A        |
| 749 | No          | 7       | 7-B  | 1000   | McF_4 | 0   | unif   | wholeT_0.01 | DiP-A, OT, OT-A             |
| 750 | No          | 7       | 7-B  | 1000   | McF_4 | 0   | unif   | wholeT_0.5  | DiP-A, OT, OT-A             |
| 751 | No          | 7       | 7-B  | 1000   | McF_4 | Inf | last   | singleC     | DiP-A, OT-A                 |
| 752 | No          | 7       | 7-B  | 1000   | McF_4 | Inf | last   | wholeT_0.01 | DiP-A, OT-A                 |
| 753 | No          | 7       | 7-B  | 1000   | McF_4 | Inf | last   | wholeT_0.5  | DiP-A, OT-A                 |
| 754 | No          | 7       | 7-B  | 1000   | McF_4 | Inf | unif   | singleC     | OT, OT-A                    |
| 755 | No          | 7       | 7-B  | 1000   | McF_4 | Inf | unif   | wholeT_0.01 | OT, OT-A                    |
| 756 | No          | 7       | 7-B  | 1000   | McF_4 | Inf | unif   | wholeT_0.5  | OT, OT-A                    |
| 757 | No          | 7       | 7-B  | 1000   | McF_6 | 0   | last   | singleC     | DiP-A, OT-A                 |

Table 11: (continued)

|     | Conjunction | Drivers | Tree | S.Size | Model | sh  | S.Time | S.Type      | Best method(s)       |
|-----|-------------|---------|------|--------|-------|-----|--------|-------------|----------------------|
| 758 | No          | 7       | 7-B  | 1000   | McF_6 | 0   | last   | wholeT_0.01 | DiP-A, OT-A          |
| 759 | No          | 7       | 7-B  | 1000   | McF_6 | 0   | last   | wholeT_0.5  | DiP-A, OT-A          |
| 760 | No          | 7       | 7-B  | 1000   | McF_6 | 0   | unif   | singleC     | DiP, DiP-A, OT, OT-A |
| 761 | No          | 7       | 7-B  | 1000   | McF_6 | 0   | unif   | wholeT_0.01 | DiP-A, OT, OT-A      |
| 762 | No          | 7       | 7-B  | 1000   | McF_6 | 0   | unif   | wholeT_0.5  | DiP, DiP-A, OT, OT-A |
| 763 | No          | 7       | 7-B  | 1000   | McF_6 | Inf | last   | singleC     | DiP-A, OT-A          |
| 764 | No          | 7       | 7-B  | 1000   | McF_6 | Inf | last   | wholeT_0.01 | DiP-A, OT-A          |
| 765 | No          | 7       | 7-B  | 1000   | McF_6 | Inf | last   | wholeT_0.5  | DiP-A, OT-A          |
| 766 | No          | 7       | 7-B  | 1000   | McF_6 | Inf | unif   | singleC     | DiP-A, OT, OT-A      |
| 767 | No          | 7       | 7-B  | 1000   | McF_6 | Inf | unif   | wholeT_0.01 | DiP-A, OT, OT-A      |
| 768 | No          | 7       | 7-B  | 1000   | McF_6 | Inf | unif   | wholeT_0.5  | DiP-A, OT, OT-A      |
| 769 | No          | 7       | 7-B  | 200    | Bozic | 0   | last   | singleC     | CBN, OT-A            |
| 770 | No          | 7       | 7-B  | 200    | Bozic | 0   | last   | wholeT_0.01 | OT-A                 |
| 771 | No          | 7       | 7-B  | 200    | Bozic | 0   | last   | wholeT_0.5  | CBN, CBN-A, OT-A     |
| 772 | No          | 7       | 7-B  | 200    | Bozic | 0   | unif   | singleC     | CBN, CBN-A           |
| 773 | No          | 7       | 7-B  | 200    | Bozic | 0   | unif   | wholeT_0.01 | CBN, CBN-A, OT, OT-A |
| 774 | No          | 7       | 7-B  | 200    | Bozic | 0   | unif   | wholeT_0.5  | CBN, CBN-A           |
| 775 | No          | 7       | 7-B  | 200    | Bozic | Inf | last   | singleC     | OT-A                 |
| 776 | No          | 7       | 7-B  | 200    | Bozic | Inf | last   | wholeT_0.01 | OT-A                 |
| 777 | No          | 7       | 7-B  | 200    | Bozic | Inf | last   | wholeT_0.5  | OT-A                 |
| 778 | No          | 7       | 7-B  | 200    | Bozic | Inf | unif   | singleC     | CBN, CBN-A, OT, OT-A |
| 779 | No          | 7       | 7-B  | 200    | Bozic | Inf | unif   | wholeT_0.01 | CBN, CBN-A, OT, OT-A |
| 780 | No          | 7       | 7-B  | 200    | Bozic | Inf | unif   | wholeT_0.5  | CBN, CBN-A           |
| 781 | No          | 7       | 7-B  | 200    | exp   | 0   | last   | singleC     | CBN-A                |
| 782 | No          | 7       | 7-B  | 200    | exp   | 0   | last   | wholeT_0.01 | CBN, CBN-A, OT-A     |
| 783 | No          | 7       | 7-B  | 200    | exp   | 0   | last   | wholeT_0.5  | CBN, CBN-A           |
| 784 | No          | 7       | 7-B  | 200    | exp   | 0   | unif   | singleC     | CBN, CBN-A           |
| 785 | No          | 7       | 7-B  | 200    | exp   | 0   | unif   | wholeT_0.01 | CBN, CBN-A           |
| 786 | No          | 7       | 7-B  | 200    | exp   | 0   | unif   | wholeT_0.5  | CBN                  |
| 787 | No          | 7       | 7-B  | 200    | exp   | Inf | last   | singleC     | OT-A                 |
| 788 | No          | 7       | 7-B  | 200    | exp   | Inf | last   | wholeT_0.01 | OT-A                 |
| 789 | No          | 7       | 7-B  | 200    | exp   | Inf | last   | wholeT_0.5  | OT-A                 |
| 790 | No          | 7       | 7-B  | 200    | exp   | Inf | unif   | singleC     | CBN, CBN-A           |
| 791 | No          | 7       | 7-B  | 200    | exp   | Inf | unif   | wholeT_0.01 | CBN, CBN-A           |
| 792 | No          | 7       | 7-B  | 200    | exp   | Inf | unif   | wholeT_0.5  | CBN, CBN-A           |
| 793 | No          | 7       | 7-B  | 200    | McF_4 | 0   | last   | singleC     | OT-A                 |
| 794 | No          | 7       | 7-B  | 200    | McF_4 | 0   | last   | wholeT_0.01 | OT-A                 |
| 795 | No          | 7       | 7-B  | 200    | McF_4 | 0   | last   | wholeT_0.5  | OT-A                 |
| 796 | No          | 7       | 7-B  | 200    | McF_4 | 0   | unif   | singleC     | OT, OT-A             |
| 797 | No          | 7       | 7-B  | 200    | McF_4 | 0   | unif   | wholeT_0.01 | OT, OT-A             |

Table 11: (continued)

|     | Conjunction | Drivers | Tree | S.Size | Model | sh  | S.Time | S.Type      | Best method(s)   |
|-----|-------------|---------|------|--------|-------|-----|--------|-------------|------------------|
| 798 | No          | 7       | 7-B  | 200    | McF_4 | 0   | unif   | wholeT_0.5  | OT, OT-A         |
| 799 | No          | 7       | 7-B  | 200    | McF_4 | Inf | last   | singleC     | OT-A             |
| 800 | No          | 7       | 7-B  | 200    | McF_4 | Inf | last   | wholeT_0.01 | OT-A             |
| 801 | No          | 7       | 7-B  | 200    | McF_4 | Inf | last   | wholeT_0.5  | OT-A             |
| 802 | No          | 7       | 7-B  | 200    | McF_4 | Inf | unif   | singleC     | OT, OT-A         |
| 803 | No          | 7       | 7-B  | 200    | McF_4 | Inf | unif   | wholeT_0.01 | OT, OT-A         |
| 804 | No          | 7       | 7-B  | 200    | McF_4 | Inf | unif   | wholeT_0.5  | OT, OT-A         |
| 805 | No          | 7       | 7-B  | 200    | McF_6 | 0   | last   | singleC     | OT-A             |
| 806 | No          | 7       | 7-B  | 200    | McF_6 | 0   | last   | wholeT_0.01 | OT-A             |
| 807 | No          | 7       | 7-B  | 200    | McF_6 | 0   | last   | wholeT_0.5  | OT-A             |
| 808 | No          | 7       | 7-B  | 200    | McF_6 | 0   | unif   | singleC     | OT, OT-A         |
| 809 | No          | 7       | 7-B  | 200    | McF_6 | 0   | unif   | wholeT_0.01 | OT, OT-A         |
| 810 | No          | 7       | 7-B  | 200    | McF_6 | 0   | unif   | wholeT_0.5  | OT, OT-A         |
| 811 | No          | 7       | 7-B  | 200    | McF_6 | Inf | last   | singleC     | OT-A             |
| 812 | No          | 7       | 7-B  | 200    | McF_6 | Inf | last   | wholeT_0.01 | OT-A             |
| 813 | No          | 7       | 7-B  | 200    | McF_6 | Inf | last   | wholeT_0.5  | OT-A             |
| 814 | No          | 7       | 7-B  | 200    | McF_6 | Inf | unif   | singleC     | OT, OT-A         |
| 815 | No          | 7       | 7-B  | 200    | McF_6 | Inf | unif   | wholeT_0.01 | OT, OT-A         |
| 816 | No          | 7       | 7-B  | 200    | McF_6 | Inf | unif   | wholeT_0.5  | OT, OT-A         |
| 817 | No          | 7       | 7-B  | 100    | Bozic | 0   | last   | singleC     | CBN, CBN-A, OT-A |
| 818 | No          | 7       | 7-B  | 100    | Bozic | 0   | last   | wholeT_0.01 | OT-A             |
| 819 | No          | 7       | 7-B  | 100    | Bozic | 0   | last   | wholeT_0.5  | CBN, CBN-A, OT-A |
| 820 | No          | 7       | 7-B  | 100    | Bozic | 0   | unif   | singleC     | CBN, CBN-A       |
| 821 | No          | 7       | 7-B  | 100    | Bozic | 0   | unif   | wholeT_0.01 | CBN, CBN-A, OT-A |
| 822 | No          | 7       | 7-B  | 100    | Bozic | 0   | unif   | wholeT_0.5  | CBN, CBN-A       |
| 823 | No          | 7       | 7-B  | 100    | Bozic | Inf | last   | singleC     | OT-A             |
| 824 | No          | 7       | 7-B  | 100    | Bozic | Inf | last   | wholeT_0.01 | OT-A             |
| 825 | No          | 7       | 7-B  | 100    | Bozic | Inf | last   | wholeT_0.5  | OT-A             |
| 826 | No          | 7       | 7-B  | 100    | Bozic | Inf | unif   | singleC     | CBN, CBN-A       |
| 827 | No          | 7       | 7-B  | 100    | Bozic | Inf | unif   | wholeT_0.01 | CBN, CBN-A, OT-A |
| 828 | No          | 7       | 7-B  | 100    | Bozic | Inf | unif   | wholeT_0.5  | CBN, CBN-A       |
| 829 | No          | 7       | 7-B  | 100    | exp   | 0   | last   | singleC     | CBN-A            |
| 830 | No          | 7       | 7-B  | 100    | exp   | 0   | last   | wholeT_0.01 | CBN, CBN-A       |
| 831 | No          | 7       | 7-B  | 100    | exp   | 0   | last   | wholeT_0.5  | CBN, CBN-A       |
| 832 | No          | 7       | 7-B  | 100    | exp   | 0   | unif   | singleC     | CBN, CBN-A       |
| 833 | No          | 7       | 7-B  | 100    | exp   | 0   | unif   | wholeT_0.01 | CBN, CBN-A       |
| 834 | No          | 7       | 7-B  | 100    | exp   | 0   | unif   | wholeT_0.5  | CBN, CBN-A       |
| 835 | No          | 7       | 7-B  | 100    | exp   | Inf | last   | singleC     | OT-A             |
| 836 | No          | 7       | 7-B  | 100    | exp   | Inf | last   | wholeT_0.01 | OT-A             |
| 837 | No          | 7       | 7-B  | 100    | exp   | Inf | last   | wholeT_0.5  | CBN, OT-A        |

Table 11: (continued)

|     | Conjunction | Drivers | Tree | S.Size | Model | sh  | S.Time | S.Type      | Best method(s) |
|-----|-------------|---------|------|--------|-------|-----|--------|-------------|----------------|
| 838 | No          | 7       | 7-B  | 100    | exp   | Inf | unif   | singleC     | CBN, CBN-A     |
| 839 | No          | 7       | 7-B  | 100    | exp   | Inf | unif   | wholeT_0.01 | CBN, CBN-A     |
| 840 | No          | 7       | 7-B  | 100    | exp   | Inf | unif   | wholeT_0.5  | CBN, CBN-A     |
| 841 | No          | 7       | 7-B  | 100    | McF_4 | 0   | last   | singleC     | OT-A           |
| 842 | No          | 7       | 7-B  | 100    | McF_4 | 0   | last   | wholeT_0.01 | OT-A           |
| 843 | No          | 7       | 7-B  | 100    | McF_4 | 0   | last   | wholeT_0.5  | OT-A           |
| 844 | No          | 7       | 7-B  | 100    | McF_4 | 0   | unif   | singleC     | OT-A           |
| 845 | No          | 7       | 7-B  | 100    | McF_4 | 0   | unif   | wholeT_0.01 | OT, OT-A       |
| 846 | No          | 7       | 7-B  | 100    | McF_4 | 0   | unif   | wholeT_0.5  | OT, OT-A       |
| 847 | No          | 7       | 7-B  | 100    | McF_4 | Inf | last   | singleC     | OT-A           |
| 848 | No          | 7       | 7-B  | 100    | McF_4 | Inf | last   | wholeT_0.01 | OT-A           |
| 849 | No          | 7       | 7-B  | 100    | McF_4 | Inf | last   | wholeT_0.5  | OT-A           |
| 850 | No          | 7       | 7-B  | 100    | McF_4 | Inf | unif   | singleC     | OT, OT-A       |
| 851 | No          | 7       | 7-B  | 100    | McF_4 | Inf | unif   | wholeT_0.01 | OT, OT-A       |
| 852 | No          | 7       | 7-B  | 100    | McF_4 | Inf | unif   | wholeT_0.5  | OT, OT-A       |
| 853 | No          | 7       | 7-B  | 100    | McF_6 | 0   | last   | singleC     | OT-A           |
| 854 | No          | 7       | 7-B  | 100    | McF_6 | 0   | last   | wholeT_0.01 | OT-A           |
| 855 | No          | 7       | 7-B  | 100    | McF_6 | 0   | last   | wholeT_0.5  | OT-A           |
| 856 | No          | 7       | 7-B  | 100    | McF_6 | 0   | unif   | singleC     | OT, OT-A       |
| 857 | No          | 7       | 7-B  | 100    | McF_6 | 0   | unif   | wholeT_0.01 | OT, OT-A       |
| 858 | No          | 7       | 7-B  | 100    | McF_6 | 0   | unif   | wholeT_0.5  | OT-A           |
| 859 | No          | 7       | 7-B  | 100    | McF_6 | Inf | last   | singleC     | OT-A           |
| 860 | No          | 7       | 7-B  | 100    | McF_6 | Inf | last   | wholeT_0.01 | OT-A           |
| 861 | No          | 7       | 7-B  | 100    | McF_6 | Inf | last   | wholeT_0.5  | OT-A           |
| 862 | No          | 7       | 7-B  | 100    | McF_6 | Inf | unif   | singleC     | OT-A           |
| 863 | No          | 7       | 7-B  | 100    | McF_6 | Inf | unif   | wholeT_0.01 | OT-A           |
| 864 | No          | 7       | 7-B  | 100    | McF_6 | Inf | unif   | wholeT_0.5  | OT, OT-A       |

#### 4.4 Confidence sets (MCB), FPF, Drivers Known

Table 12: Confidence sets (method MCB) when Drivers are Known for measure FPF.

|    | Conjunction | Drivers | Tree | S.Size | Model | sh  | S.Time | S.Type      | Best method(s)       |
|----|-------------|---------|------|--------|-------|-----|--------|-------------|----------------------|
| 1  | Yes         | 11      | 11-A | 1000   | Bozic | 0   | last   | singleC     | DiP-A, OT, OT-A      |
| 2  | Yes         | 11      | 11-A | 1000   | Bozic | 0   | last   | wholeT_0.01 | DiP, DiP-A           |
| 3  | Yes         | 11      | 11-A | 1000   | Bozic | 0   | last   | wholeT_0.5  | DiP, DiP-A, OT, OT-A |
| 4  | Yes         | 11      | 11-A | 1000   | Bozic | 0   | unif   | singleC     | DiP, DiP-A           |
| 5  | Yes         | 11      | 11-A | 1000   | Bozic | 0   | unif   | wholeT_0.01 | DiP-A                |
| 6  | Yes         | 11      | 11-A | 1000   | Bozic | 0   | unif   | wholeT_0.5  | DiP, DiP-A           |
| 7  | Yes         | 11      | 11-A | 1000   | Bozic | Inf | last   | singleC     | OT, OT-A             |
| 8  | Yes         | 11      | 11-A | 1000   | Bozic | Inf | last   | wholeT_0.01 | DiP, DiP-A           |
| 9  | Yes         | 11      | 11-A | 1000   | Bozic | Inf | last   | wholeT_0.5  | OT, OT-A             |
| 10 | Yes         | 11      | 11-A | 1000   | Bozic | Inf | unif   | singleC     | DiP, DiP-A, OT, OT-A |
| 11 | Yes         | 11      | 11-A | 1000   | Bozic | Inf | unif   | wholeT_0.01 | DiP, OT, OT-A        |
| 12 | Yes         | 11      | 11-A | 1000   | Bozic | Inf | unif   | wholeT_0.5  | DiP, DiP-A, OT, OT-A |
| 13 | Yes         | 11      | 11-A | 1000   | exp   | 0   | last   | singleC     | DiP, DiP-A, OT, OT-A |
| 14 | Yes         | 11      | 11-A | 1000   | exp   | 0   | last   | wholeT_0.01 | DiP-A, OT, OT-A      |
| 15 | Yes         | 11      | 11-A | 1000   | exp   | 0   | last   | wholeT_0.5  | DiP, DiP-A, OT, OT-A |
| 16 | Yes         | 11      | 11-A | 1000   | exp   | 0   | unif   | singleC     | DiP, DiP-A, OT, OT-A |
| 17 | Yes         | 11      | 11-A | 1000   | exp   | 0   | unif   | wholeT_0.01 | DiP, DiP-A           |
| 18 | Yes         | 11      | 11-A | 1000   | exp   | 0   | unif   | wholeT_0.5  | DiP, DiP-A, OT, OT-A |
| 19 | Yes         | 11      | 11-A | 1000   | exp   | Inf | last   | singleC     | DiP, DiP-A, OT, OT-A |
| 20 | Yes         | 11      | 11-A | 1000   | exp   | Inf | last   | wholeT_0.01 | OT, OT-A             |
| 21 | Yes         | 11      | 11-A | 1000   | exp   | Inf | last   | wholeT_0.5  | DiP, DiP-A, OT, OT-A |
| 22 | Yes         | 11      | 11-A | 1000   | exp   | Inf | unif   | singleC     | DiP, DiP-A, OT, OT-A |
| 23 | Yes         | 11      | 11-A | 1000   | exp   | Inf | unif   | wholeT_0.01 | DiP, DiP-A, OT, OT-A |
| 24 | Yes         | 11      | 11-A | 1000   | exp   | Inf | unif   | wholeT_0.5  | DiP, DiP-A, OT, OT-A |
| 25 | Yes         | 11      | 11-A | 1000   | McF_4 | 0   | last   | singleC     | DiP, DiP-A, OT, OT-A |
| 26 | Yes         | 11      | 11-A | 1000   | McF_4 | 0   | last   | wholeT_0.01 | DiP-A, OT, OT-A      |
| 27 | Yes         | 11      | 11-A | 1000   | McF_4 | 0   | last   | wholeT_0.5  | DiP-A, OT, OT-A      |
| 28 | Yes         | 11      | 11-A | 1000   | McF_4 | 0   | unif   | singleC     | DiP, DiP-A           |
| 29 | Yes         | 11      | 11-A | 1000   | McF_4 | 0   | unif   | wholeT_0.01 | DiP-A                |
| 30 | Yes         | 11      | 11-A | 1000   | McF_4 | 0   | unif   | wholeT_0.5  | DiP, DiP-A           |
| 31 | Yes         | 11      | 11-A | 1000   | McF_4 | Inf | last   | singleC     | OT, OT-A             |
| 32 | Yes         | 11      | 11-A | 1000   | McF_4 | Inf | last   | wholeT_0.01 | OT, OT-A             |
| 33 | Yes         | 11      | 11-A | 1000   | McF_4 | Inf | last   | wholeT_0.5  | DiP-A, OT, OT-A      |
| 34 | Yes         | 11      | 11-A | 1000   | McF_4 | Inf | unif   | singleC     | DiP, DiP-A, OT, OT-A |
| 35 | Yes         | 11      | 11-A | 1000   | McF_4 | Inf | unif   | wholeT_0.01 | DiP-A, OT, OT-A      |
| 36 | Yes         | 11      | 11-A | 1000   | McF_4 | Inf | unif   | wholeT_0.5  | DiP, DiP-A, OT, OT-A |
| 37 | Yes         | 11      | 11-A | 1000   | McF_6 | 0   | last   | singleC     | DiP, OT              |

Table 12: (continued)

|    | Conjunction | Drivers | Tree | S.Size | Model | sh  | S.Time | S.Type      | Best method(s)       |
|----|-------------|---------|------|--------|-------|-----|--------|-------------|----------------------|
| 38 | Yes         | 11      | 11-A | 1000   | McF_6 | 0   | last   | wholeT_0.01 | DiP, OT              |
| 39 | Yes         | 11      | 11-A | 1000   | McF_6 | 0   | last   | wholeT_0.5  | DiP, OT              |
| 40 | Yes         | 11      | 11-A | 1000   | McF_6 | 0   | unif   | singleC     | DiP, DiP-A, OT-A     |
| 41 | Yes         | 11      | 11-A | 1000   | McF_6 | 0   | unif   | wholeT_0.01 | DiP, DiP-A, OT, OT-A |
| 42 | Yes         | 11      | 11-A | 1000   | McF_6 | 0   | unif   | wholeT_0.5  | DiP, DiP-A, OT       |
| 43 | Yes         | 11      | 11-A | 1000   | McF_6 | Inf | last   | singleC     | DiP, OT              |
| 44 | Yes         | 11      | 11-A | 1000   | McF_6 | Inf | last   | wholeT_0.01 | DiP, OT              |
| 45 | Yes         | 11      | 11-A | 1000   | McF_6 | Inf | last   | wholeT_0.5  | DiP, OT              |
| 46 | Yes         | 11      | 11-A | 1000   | McF_6 | Inf | unif   | singleC     | DiP, DiP-A           |
| 47 | Yes         | 11      | 11-A | 1000   | McF_6 | Inf | unif   | wholeT_0.01 | DiP, DiP-A           |
| 48 | Yes         | 11      | 11-A | 1000   | McF_6 | Inf | unif   | wholeT_0.5  | DiP, DiP-A           |
| 49 | Yes         | 11      | 11-A | 200    | Bozic | 0   | last   | singleC     | DiP, DiP-A, OT, OT-A |
| 50 | Yes         | 11      | 11-A | 200    | Bozic | 0   | last   | wholeT_0.01 | DiP, DiP-A           |
| 51 | Yes         | 11      | 11-A | 200    | Bozic | 0   | last   | wholeT_0.5  | DiP, DiP-A, OT, OT-A |
| 52 | Yes         | 11      | 11-A | 200    | Bozic | 0   | unif   | singleC     | DiP, DiP-A           |
| 53 | Yes         | 11      | 11-A | 200    | Bozic | 0   | unif   | wholeT_0.01 | DiP, DiP-A           |
| 54 | Yes         | 11      | 11-A | 200    | Bozic | 0   | unif   | wholeT_0.5  | DiP, DiP-A, OT, OT-A |
| 55 | Yes         | 11      | 11-A | 200    | Bozic | Inf | last   | singleC     | DiP, DiP-A, OT, OT-A |
| 56 | Yes         | 11      | 11-A | 200    | Bozic | Inf | last   | wholeT_0.01 | DiP, DiP-A, OT, OT-A |
| 57 | Yes         | 11      | 11-A | 200    | Bozic | Inf | last   | wholeT_0.5  | DiP, DiP-A, OT, OT-A |
| 58 | Yes         | 11      | 11-A | 200    | Bozic | Inf | unif   | singleC     | DiP, DiP-A           |
| 59 | Yes         | 11      | 11-A | 200    | Bozic | Inf | unif   | wholeT_0.01 | DiP, DiP-A, OT, OT-A |
| 60 | Yes         | 11      | 11-A | 200    | Bozic | Inf | unif   | wholeT_0.5  | DiP, DiP-A           |
| 61 | Yes         | 11      | 11-A | 200    | exp   | 0   | last   | singleC     | DiP, DiP-A, OT, OT-A |
| 62 | Yes         | 11      | 11-A | 200    | exp   | 0   | last   | wholeT_0.01 | DiP, DiP-A, OT, OT-A |
| 63 | Yes         | 11      | 11-A | 200    | exp   | 0   | last   | wholeT_0.5  | DiP, DiP-A, OT, OT-A |
| 64 | Yes         | 11      | 11-A | 200    | exp   | 0   | unif   | singleC     | DiP, DiP-A, OT, OT-A |
| 65 | Yes         | 11      | 11-A | 200    | exp   | 0   | unif   | wholeT_0.01 | DiP, DiP-A           |
| 66 | Yes         | 11      | 11-A | 200    | exp   | 0   | unif   | wholeT_0.5  | DiP, DiP-A, OT, OT-A |
| 67 | Yes         | 11      | 11-A | 200    | exp   | Inf | last   | singleC     | DiP, DiP-A, OT, OT-A |
| 68 | Yes         | 11      | 11-A | 200    | exp   | Inf | last   | wholeT_0.01 | DiP, DiP-A, OT, OT-A |
| 69 | Yes         | 11      | 11-A | 200    | exp   | Inf | last   | wholeT_0.5  | DiP, DiP-A           |
| 70 | Yes         | 11      | 11-A | 200    | exp   | Inf | unif   | singleC     | DiP, DiP-A, OT, OT-A |
| 71 | Yes         | 11      | 11-A | 200    | exp   | Inf | unif   | wholeT_0.01 | DiP, DiP-A           |
| 72 | Yes         | 11      | 11-A | 200    | exp   | Inf | unif   | wholeT_0.5  | DiP, DiP-A, OT-A     |
| 73 | Yes         | 11      | 11-A | 200    | McF_4 | 0   | last   | singleC     | DiP, DiP-A, OT, OT-A |
| 74 | Yes         | 11      | 11-A | 200    | McF_4 | 0   | last   | wholeT_0.01 | DiP-A, OT, OT-A      |
| 75 | Yes         | 11      | 11-A | 200    | McF_4 | 0   | last   | wholeT_0.5  | DiP, DiP-A, OT, OT-A |
| 76 | Yes         | 11      | 11-A | 200    | McF_4 | 0   | unif   | singleC     | DiP, DiP-A, OT, OT-A |
| 77 | Yes         | 11      | 11-A | 200    | McF_4 | 0   | unif   | wholeT_0.01 | DiP, DiP-A           |



Table 12: (continued)

|     | Conjunction | Drivers | Tree | S.Size | Model | sh  | S.Time | S.Type      | Best method(s)       |
|-----|-------------|---------|------|--------|-------|-----|--------|-------------|----------------------|
| 78  | Yes         | 11      | 11-A | 200    | McF_4 | 0   | unif   | wholeT_0.5  | DiP, DiP-A           |
| 79  | Yes         | 11      | 11-A | 200    | McF_4 | Inf | last   | singleC     | DiP, DiP-A, OT, OT-A |
| 80  | Yes         | 11      | 11-A | 200    | McF_4 | Inf | last   | wholeT_0.01 | OT, OT-A             |
| 81  | Yes         | 11      | 11-A | 200    | McF_4 | Inf | last   | wholeT_0.5  | DiP, DiP-A, OT, OT-A |
| 82  | Yes         | 11      | 11-A | 200    | McF_4 | Inf | unif   | singleC     | DiP, DiP-A, OT, OT-A |
| 83  | Yes         | 11      | 11-A | 200    | McF_4 | Inf | unif   | wholeT_0.01 | DiP, DiP-A, OT, OT-A |
| 84  | Yes         | 11      | 11-A | 200    | McF_4 | Inf | unif   | wholeT_0.5  | DiP, DiP-A, OT, OT-A |
| 85  | Yes         | 11      | 11-A | 200    | McF_6 | 0   | last   | singleC     | DiP, OT              |
| 86  | Yes         | 11      | 11-A | 200    | McF_6 | 0   | last   | wholeT_0.01 | DiP, OT              |
| 87  | Yes         | 11      | 11-A | 200    | McF_6 | 0   | last   | wholeT_0.5  | DiP, OT              |
| 88  | Yes         | 11      | 11-A | 200    | McF_6 | 0   | unif   | singleC     | DiP, OT, OT-A        |
| 89  | Yes         | 11      | 11-A | 200    | McF_6 | 0   | unif   | wholeT_0.01 | DiP, DiP-A, OT, OT-A |
| 90  | Yes         | 11      | 11-A | 200    | McF_6 | 0   | unif   | wholeT_0.5  | DiP, OT, OT-A        |
| 91  | Yes         | 11      | 11-A | 200    | McF_6 | Inf | last   | singleC     | DiP, OT              |
| 92  | Yes         | 11      | 11-A | 200    | McF_6 | Inf | last   | wholeT_0.01 | DiP, OT              |
| 93  | Yes         | 11      | 11-A | 200    | McF_6 | Inf | last   | wholeT_0.5  | DiP, OT              |
| 94  | Yes         | 11      | 11-A | 200    | McF_6 | Inf | unif   | singleC     | OT, OT-A             |
| 95  | Yes         | 11      | 11-A | 200    | McF_6 | Inf | unif   | wholeT_0.01 | OT, OT-A             |
| 96  | Yes         | 11      | 11-A | 200    | McF_6 | Inf | unif   | wholeT_0.5  | OT, OT-A             |
| 97  | Yes         | 11      | 11-A | 100    | Bozic | 0   | last   | singleC     | DiP, DiP-A, OT       |
| 98  | Yes         | 11      | 11-A | 100    | Bozic | 0   | last   | wholeT_0.01 | DiP, DiP-A           |
| 99  | Yes         | 11      | 11-A | 100    | Bozic | 0   | last   | wholeT_0.5  | DiP, DiP-A, OT, OT-A |
| 100 | Yes         | 11      | 11-A | 100    | Bozic | 0   | unif   | singleC     | DiP, DiP-A, OT       |
| 101 | Yes         | 11      | 11-A | 100    | Bozic | 0   | unif   | wholeT_0.01 | DiP, DiP-A, OT, OT-A |
| 102 | Yes         | 11      | 11-A | 100    | Bozic | 0   | unif   | wholeT_0.5  | DiP, DiP-A, OT, OT-A |
| 103 | Yes         | 11      | 11-A | 100    | Bozic | Inf | last   | singleC     | DiP, DiP-A, OT, OT-A |
| 104 | Yes         | 11      | 11-A | 100    | Bozic | Inf | last   | wholeT_0.01 | DiP, DiP-A           |
| 105 | Yes         | 11      | 11-A | 100    | Bozic | Inf | last   | wholeT_0.5  | DiP, DiP-A, OT-A     |
| 106 | Yes         | 11      | 11-A | 100    | Bozic | Inf | unif   | singleC     | DiP, DiP-A, OT, OT-A |
| 107 | Yes         | 11      | 11-A | 100    | Bozic | Inf | unif   | wholeT_0.01 | DiP, DiP-A           |
| 108 | Yes         | 11      | 11-A | 100    | Bozic | Inf | unif   | wholeT_0.5  | DiP, DiP-A           |
| 109 | Yes         | 11      | 11-A | 100    | exp   | 0   | last   | singleC     | DiP, DiP-A, OT-A     |
| 110 | Yes         | 11      | 11-A | 100    | exp   | 0   | last   | wholeT_0.01 | DiP, DiP-A, OT, OT-A |
| 111 | Yes         | 11      | 11-A | 100    | exp   | 0   | last   | wholeT_0.5  | DiP, DiP-A, OT, OT-A |
| 112 | Yes         | 11      | 11-A | 100    | exp   | 0   | unif   | singleC     | DiP, DiP-A, OT, OT-A |
| 113 | Yes         | 11      | 11-A | 100    | exp   | 0   | unif   | wholeT_0.01 | DiP, DiP-A           |
| 114 | Yes         | 11      | 11-A | 100    | exp   | 0   | unif   | wholeT_0.5  | DiP, DiP-A, OT, OT-A |
| 115 | Yes         | 11      | 11-A | 100    | exp   | Inf | last   | singleC     | DiP, DiP-A, OT       |
| 116 | Yes         | 11      | 11-A | 100    | exp   | Inf | last   | wholeT_0.01 | DiP, DiP-A, OT, OT-A |
| 117 | Yes         | 11      | 11-A | 100    | exp   | Inf | last   | wholeT_0.5  | DiP, DiP-A, OT, OT-A |

Table 12: (continued)

|     | Conjunction | Drivers | Tree | S.Size | Model | sh  | S.Time | S.Type      | Best method(s)       |
|-----|-------------|---------|------|--------|-------|-----|--------|-------------|----------------------|
| 118 | Yes         | 11      | 11-A | 100    | exp   | Inf | unif   | singleC     | DiP, DiP-A, OT, OT-A |
| 119 | Yes         | 11      | 11-A | 100    | exp   | Inf | unif   | wholeT_0.01 | DiP, DiP-A           |
| 120 | Yes         | 11      | 11-A | 100    | exp   | Inf | unif   | wholeT_0.5  | DiP, DiP-A, OT, OT-A |
| 121 | Yes         | 11      | 11-A | 100    | McF_4 | 0   | last   | singleC     | DiP, DiP-A           |
| 122 | Yes         | 11      | 11-A | 100    | McF_4 | 0   | last   | wholeT_0.01 | DiP, DiP-A           |
| 123 | Yes         | 11      | 11-A | 100    | McF_4 | 0   | last   | wholeT_0.5  | DiP, DiP-A, OT, OT-A |
| 124 | Yes         | 11      | 11-A | 100    | McF_4 | 0   | unif   | singleC     | DiP, DiP-A, OT-A     |
| 125 | Yes         | 11      | 11-A | 100    | McF_4 | 0   | unif   | wholeT_0.01 | DiP, DiP-A           |
| 126 | Yes         | 11      | 11-A | 100    | McF_4 | 0   | unif   | wholeT_0.5  | DiP, DiP-A, OT, OT-A |
| 127 | Yes         | 11      | 11-A | 100    | McF_4 | Inf | last   | singleC     | DiP, DiP-A, OT, OT-A |
| 128 | Yes         | 11      | 11-A | 100    | McF_4 | Inf | last   | wholeT_0.01 | DiP, DiP-A           |
| 129 | Yes         | 11      | 11-A | 100    | McF_4 | Inf | last   | wholeT_0.5  | DiP, DiP-A, OT, OT-A |
| 130 | Yes         | 11      | 11-A | 100    | McF_4 | Inf | unif   | singleC     | DiP, DiP-A, OT, OT-A |
| 131 | Yes         | 11      | 11-A | 100    | McF_4 | Inf | unif   | wholeT_0.01 | DiP                  |
| 132 | Yes         | 11      | 11-A | 100    | McF_4 | Inf | unif   | wholeT_0.5  | DiP, DiP-A, OT, OT-A |
| 133 | Yes         | 11      | 11-A | 100    | McF_6 | 0   | last   | singleC     | DiP                  |
| 134 | Yes         | 11      | 11-A | 100    | McF_6 | 0   | last   | wholeT_0.01 | DiP, OT              |
| 135 | Yes         | 11      | 11-A | 100    | McF_6 | 0   | last   | wholeT_0.5  | DiP, OT              |
| 136 | Yes         | 11      | 11-A | 100    | McF_6 | 0   | unif   | singleC     | DiP, DiP-A, OT, OT-A |
| 137 | Yes         | 11      | 11-A | 100    | McF_6 | 0   | unif   | wholeT_0.01 | DiP, DiP-A           |
| 138 | Yes         | 11      | 11-A | 100    | McF_6 | 0   | unif   | wholeT_0.5  | DiP, DiP-A, OT, OT-A |
| 139 | Yes         | 11      | 11-A | 100    | McF_6 | Inf | last   | singleC     | DiP, OT              |
| 140 | Yes         | 11      | 11-A | 100    | McF_6 | Inf | last   | wholeT_0.01 | DiP                  |
| 141 | Yes         | 11      | 11-A | 100    | McF_6 | Inf | last   | wholeT_0.5  | DiP, OT              |
| 142 | Yes         | 11      | 11-A | 100    | McF_6 | Inf | unif   | singleC     | DiP, DiP-A, OT, OT-A |
| 143 | Yes         | 11      | 11-A | 100    | McF_6 | Inf | unif   | wholeT_0.01 | DiP, OT, OT-A        |
| 144 | Yes         | 11      | 11-A | 100    | McF_6 | Inf | unif   | wholeT_0.5  | DiP, DiP-A, OT, OT-A |
| 145 | Yes         | 9       | 9-A  | 1000   | Bozic | 0   | last   | singleC     | DiP, DiP-A, OT, OT-A |
| 146 | Yes         | 9       | 9-A  | 1000   | Bozic | 0   | last   | wholeT_0.01 | DiP, DiP-A           |
| 147 | Yes         | 9       | 9-A  | 1000   | Bozic | 0   | last   | wholeT_0.5  | DiP, DiP-A, OT, OT-A |
| 148 | Yes         | 9       | 9-A  | 1000   | Bozic | 0   | unif   | singleC     | DiP, DiP-A, OT       |
| 149 | Yes         | 9       | 9-A  | 1000   | Bozic | 0   | unif   | wholeT_0.01 | DiP, DiP-A, OT-A     |
| 150 | Yes         | 9       | 9-A  | 1000   | Bozic | 0   | unif   | wholeT_0.5  | DiP, DiP-A, OT-A     |
| 151 | Yes         | 9       | 9-A  | 1000   | Bozic | Inf | last   | singleC     | OT, OT-A             |
| 152 | Yes         | 9       | 9-A  | 1000   | Bozic | Inf | last   | wholeT_0.01 | DiP, DiP-A, OT-A     |
| 153 | Yes         | 9       | 9-A  | 1000   | Bozic | Inf | last   | wholeT_0.5  | OT, OT-A             |
| 154 | Yes         | 9       | 9-A  | 1000   | Bozic | Inf | unif   | singleC     | DiP, DiP-A, OT-A     |
| 155 | Yes         | 9       | 9-A  | 1000   | Bozic | Inf | unif   | wholeT_0.01 | DiP, DiP-A           |
| 156 | Yes         | 9       | 9-A  | 1000   | Bozic | Inf | unif   | wholeT_0.5  | DiP, DiP-A, OT, OT-A |
| 157 | Yes         | 9       | 9-A  | 1000   | exp   | 0   | last   | singleC     | DiP, DiP-A, OT, OT-A |

Table 12: (continued)

|     | Conjunction | Drivers | Tree | S.Size | Model | sh  | S.Time | S.Type      | Best method(s)       |
|-----|-------------|---------|------|--------|-------|-----|--------|-------------|----------------------|
| 158 | Yes         | 9       | 9-A  | 1000   | exp   | 0   | last   | wholeT_0.01 | DiP-A, OT, OT-A      |
| 159 | Yes         | 9       | 9-A  | 1000   | exp   | 0   | last   | wholeT_0.5  | DiP, DiP-A, OT, OT-A |
| 160 | Yes         | 9       | 9-A  | 1000   | exp   | 0   | unif   | singleC     | DiP, DiP-A, OT, OT-A |
| 161 | Yes         | 9       | 9-A  | 1000   | exp   | 0   | unif   | wholeT_0.01 | DiP, DiP-A, OT       |
| 162 | Yes         | 9       | 9-A  | 1000   | exp   | 0   | unif   | wholeT_0.5  | DiP, DiP-A, OT, OT-A |
| 163 | Yes         | 9       | 9-A  | 1000   | exp   | Inf | last   | singleC     | OT, OT-A             |
| 164 | Yes         | 9       | 9-A  | 1000   | exp   | Inf | last   | wholeT_0.01 | DiP, DiP-A, OT, OT-A |
| 165 | Yes         | 9       | 9-A  | 1000   | exp   | Inf | last   | wholeT_0.5  | OT, OT-A             |
| 166 | Yes         | 9       | 9-A  | 1000   | exp   | Inf | unif   | singleC     | DiP, DiP-A, OT, OT-A |
| 167 | Yes         | 9       | 9-A  | 1000   | exp   | Inf | unif   | wholeT_0.01 | OT, OT-A             |
| 168 | Yes         | 9       | 9-A  | 1000   | exp   | Inf | unif   | wholeT_0.5  | DiP, DiP-A, OT, OT-A |
| 169 | Yes         | 9       | 9-A  | 1000   | McF_4 | 0   | last   | singleC     | DiP, DiP-A, OT, OT-A |
| 170 | Yes         | 9       | 9-A  | 1000   | McF_4 | 0   | last   | wholeT_0.01 | DiP, DiP-A, OT, OT-A |
| 171 | Yes         | 9       | 9-A  | 1000   | McF_4 | 0   | last   | wholeT_0.5  | DiP, DiP-A, OT, OT-A |
| 172 | Yes         | 9       | 9-A  | 1000   | McF_4 | 0   | unif   | singleC     | DiP-A, OT, OT-A      |
| 173 | Yes         | 9       | 9-A  | 1000   | McF_4 | 0   | unif   | wholeT_0.01 | DiP, DiP-A           |
| 174 | Yes         | 9       | 9-A  | 1000   | McF_4 | 0   | unif   | wholeT_0.5  | DiP, DiP-A, OT, OT-A |
| 175 | Yes         | 9       | 9-A  | 1000   | McF_4 | Inf | last   | singleC     | OT, OT-A             |
| 176 | Yes         | 9       | 9-A  | 1000   | McF_4 | Inf | last   | wholeT_0.01 | DiP, OT              |
| 177 | Yes         | 9       | 9-A  | 1000   | McF_4 | Inf | last   | wholeT_0.5  | DiP, OT, OT-A        |
| 178 | Yes         | 9       | 9-A  | 1000   | McF_4 | Inf | unif   | singleC     | DiP, DiP-A, OT, OT-A |
| 179 | Yes         | 9       | 9-A  | 1000   | McF_4 | Inf | unif   | wholeT_0.01 | OT, OT-A             |
| 180 | Yes         | 9       | 9-A  | 1000   | McF_4 | Inf | unif   | wholeT_0.5  | DiP, DiP-A, OT, OT-A |
| 181 | Yes         | 9       | 9-A  | 1000   | McF_6 | 0   | last   | singleC     | OT                   |
| 182 | Yes         | 9       | 9-A  | 1000   | McF_6 | 0   | last   | wholeT_0.01 | DiP, OT              |
| 183 | Yes         | 9       | 9-A  | 1000   | McF_6 | 0   | last   | wholeT_0.5  | DiP, OT              |
| 184 | Yes         | 9       | 9-A  | 1000   | McF_6 | 0   | unif   | singleC     | DiP, DiP-A, OT, OT-A |
| 185 | Yes         | 9       | 9-A  | 1000   | McF_6 | 0   | unif   | wholeT_0.01 | DiP, DiP-A, OT, OT-A |
| 186 | Yes         | 9       | 9-A  | 1000   | McF_6 | 0   | unif   | wholeT_0.5  | DiP, DiP-A           |
| 187 | Yes         | 9       | 9-A  | 1000   | McF_6 | Inf | last   | singleC     | DiP, OT              |
| 188 | Yes         | 9       | 9-A  | 1000   | McF_6 | Inf | last   | wholeT_0.01 | OT                   |
| 189 | Yes         | 9       | 9-A  | 1000   | McF_6 | Inf | last   | wholeT_0.5  | DiP, OT              |
| 190 | Yes         | 9       | 9-A  | 1000   | McF_6 | Inf | unif   | singleC     | DiP, DiP-A, OT, OT-A |
| 191 | Yes         | 9       | 9-A  | 1000   | McF_6 | Inf | unif   | wholeT_0.01 | DiP, DiP-A, OT, OT-A |
| 192 | Yes         | 9       | 9-A  | 1000   | McF_6 | Inf | unif   | wholeT_0.5  | DiP, DiP-A, OT, OT-A |
| 193 | Yes         | 9       | 9-A  | 200    | Bozic | 0   | last   | singleC     | DiP, DiP-A, OT, OT-A |
| 194 | Yes         | 9       | 9-A  | 200    | Bozic | 0   | last   | wholeT_0.01 | DiP, DiP-A           |
| 195 | Yes         | 9       | 9-A  | 200    | Bozic | 0   | last   | wholeT_0.5  | DiP, DiP-A           |
| 196 | Yes         | 9       | 9-A  | 200    | Bozic | 0   | unif   | singleC     | DiP, DiP-A, OT, OT-A |
| 197 | Yes         | 9       | 9-A  | 200    | Bozic | 0   | unif   | wholeT_0.01 | DiP-A, OT, OT-A      |

Table 12: (continued)

|     | Conjunction | Drivers | Tree | S.Size | Model | sh  | S.Time | S.Type      | Best method(s)       |
|-----|-------------|---------|------|--------|-------|-----|--------|-------------|----------------------|
| 198 | Yes         | 9       | 9-A  | 200    | Bozic | 0   | unif   | wholeT_0.5  | DiP, DiP-A, OT, OT-A |
| 199 | Yes         | 9       | 9-A  | 200    | Bozic | Inf | last   | singleC     | OT, OT-A             |
| 200 | Yes         | 9       | 9-A  | 200    | Bozic | Inf | last   | wholeT_0.01 | DiP, DiP-A           |
| 201 | Yes         | 9       | 9-A  | 200    | Bozic | Inf | last   | wholeT_0.5  | OT, OT-A             |
| 202 | Yes         | 9       | 9-A  | 200    | Bozic | Inf | unif   | singleC     | DiP, DiP-A, OT, OT-A |
| 203 | Yes         | 9       | 9-A  | 200    | Bozic | Inf | unif   | wholeT_0.01 | DiP, DiP-A, OT, OT-A |
| 204 | Yes         | 9       | 9-A  | 200    | Bozic | Inf | unif   | wholeT_0.5  | DiP, DiP-A, OT, OT-A |
| 205 | Yes         | 9       | 9-A  | 200    | exp   | 0   | last   | singleC     | DiP, DiP-A, OT, OT-A |
| 206 | Yes         | 9       | 9-A  | 200    | exp   | 0   | last   | wholeT_0.01 | DiP, DiP-A, OT, OT-A |
| 207 | Yes         | 9       | 9-A  | 200    | exp   | 0   | last   | wholeT_0.5  | DiP, DiP-A, OT, OT-A |
| 208 | Yes         | 9       | 9-A  | 200    | exp   | 0   | unif   | singleC     | DiP, DiP-A, OT, OT-A |
| 209 | Yes         | 9       | 9-A  | 200    | exp   | 0   | unif   | wholeT_0.01 | DiP, DiP-A, OT, OT-A |
| 210 | Yes         | 9       | 9-A  | 200    | exp   | 0   | unif   | wholeT_0.5  | DiP, DiP-A, OT, OT-A |
| 211 | Yes         | 9       | 9-A  | 200    | exp   | Inf | last   | singleC     | DiP, DiP-A, OT, OT-A |
| 212 | Yes         | 9       | 9-A  | 200    | exp   | Inf | last   | wholeT_0.01 | DiP, DiP-A           |
| 213 | Yes         | 9       | 9-A  | 200    | exp   | Inf | last   | wholeT_0.5  | DiP, DiP-A, OT, OT-A |
| 214 | Yes         | 9       | 9-A  | 200    | exp   | Inf | unif   | singleC     | DiP, DiP-A, OT, OT-A |
| 215 | Yes         | 9       | 9-A  | 200    | exp   | Inf | unif   | wholeT_0.01 | DiP, DiP-A           |
| 216 | Yes         | 9       | 9-A  | 200    | exp   | Inf | unif   | wholeT_0.5  | DiP, DiP-A, OT, OT-A |
| 217 | Yes         | 9       | 9-A  | 200    | McF_4 | 0   | last   | singleC     | DiP, DiP-A, OT, OT-A |
| 218 | Yes         | 9       | 9-A  | 200    | McF_4 | 0   | last   | wholeT_0.01 | DiP, DiP-A           |
| 219 | Yes         | 9       | 9-A  | 200    | McF_4 | 0   | last   | wholeT_0.5  | DiP, DiP-A, OT, OT-A |
| 220 | Yes         | 9       | 9-A  | 200    | McF_4 | 0   | unif   | singleC     | DiP, DiP-A, OT, OT-A |
| 221 | Yes         | 9       | 9-A  | 200    | McF_4 | 0   | unif   | wholeT_0.01 | DiP, DiP-A           |
| 222 | Yes         | 9       | 9-A  | 200    | McF_4 | 0   | unif   | wholeT_0.5  | DiP, DiP-A, OT, OT-A |
| 223 | Yes         | 9       | 9-A  | 200    | McF_4 | Inf | last   | singleC     | OT, OT-A             |
| 224 | Yes         | 9       | 9-A  | 200    | McF_4 | Inf | last   | wholeT_0.01 | DiP, OT              |
| 225 | Yes         | 9       | 9-A  | 200    | McF_4 | Inf | last   | wholeT_0.5  | DiP, DiP-A, OT, OT-A |
| 226 | Yes         | 9       | 9-A  | 200    | McF_4 | Inf | unif   | singleC     | DiP, DiP-A, OT, OT-A |
| 227 | Yes         | 9       | 9-A  | 200    | McF_4 | Inf | unif   | wholeT_0.01 | DiP, DiP-A, OT, OT-A |
| 228 | Yes         | 9       | 9-A  | 200    | McF_4 | Inf | unif   | wholeT_0.5  | DiP, DiP-A, OT, OT-A |
| 229 | Yes         | 9       | 9-A  | 200    | McF_6 | 0   | last   | singleC     | DiP, OT              |
| 230 | Yes         | 9       | 9-A  | 200    | McF_6 | 0   | last   | wholeT_0.01 | DiP, OT              |
| 231 | Yes         | 9       | 9-A  | 200    | McF_6 | 0   | last   | wholeT_0.5  | DiP, OT              |
| 232 | Yes         | 9       | 9-A  | 200    | McF_6 | 0   | unif   | singleC     | DiP, DiP-A, OT, OT-A |
| 233 | Yes         | 9       | 9-A  | 200    | McF_6 | 0   | unif   | wholeT_0.01 | DiP, DiP-A, OT, OT-A |
| 234 | Yes         | 9       | 9-A  | 200    | McF_6 | 0   | unif   | wholeT_0.5  | DiP, DiP-A, OT, OT-A |
| 235 | Yes         | 9       | 9-A  | 200    | McF_6 | Inf | last   | singleC     | DiP, OT              |
| 236 | Yes         | 9       | 9-A  | 200    | McF_6 | Inf | last   | wholeT_0.01 | OT                   |
| 237 | Yes         | 9       | 9-A  | 200    | McF_6 | Inf | last   | wholeT_0.5  | DiP, OT              |

Table 12: (continued)

|     | Conjunction | Drivers | Tree | S.Size | Model | sh  | S.Time | S.Type      | Best method(s)       |
|-----|-------------|---------|------|--------|-------|-----|--------|-------------|----------------------|
| 238 | Yes         | 9       | 9-A  | 200    | McF_6 | Inf | unif   | singleC     | DiP, DiP-A, OT       |
| 239 | Yes         | 9       | 9-A  | 200    | McF_6 | Inf | unif   | wholeT_0.01 | DiP, DiP-A, OT, OT-A |
| 240 | Yes         | 9       | 9-A  | 200    | McF_6 | Inf | unif   | wholeT_0.5  | DiP, DiP-A, OT, OT-A |
| 241 | Yes         | 9       | 9-A  | 100    | Bozic | 0   | last   | singleC     | DiP, DiP-A, OT, OT-A |
| 242 | Yes         | 9       | 9-A  | 100    | Bozic | 0   | last   | wholeT_0.01 | DiP, DiP-A, OT, OT-A |
| 243 | Yes         | 9       | 9-A  | 100    | Bozic | 0   | last   | wholeT_0.5  | DiP, DiP-A, OT, OT-A |
| 244 | Yes         | 9       | 9-A  | 100    | Bozic | 0   | unif   | singleC     | DiP, DiP-A, OT, OT-A |
| 245 | Yes         | 9       | 9-A  | 100    | Bozic | 0   | unif   | wholeT_0.01 | DiP, DiP-A           |
| 246 | Yes         | 9       | 9-A  | 100    | Bozic | 0   | unif   | wholeT_0.5  | DiP, DiP-A, OT, OT-A |
| 247 | Yes         | 9       | 9-A  | 100    | Bozic | Inf | last   | singleC     | DiP, DiP-A, OT, OT-A |
| 248 | Yes         | 9       | 9-A  | 100    | Bozic | Inf | last   | wholeT_0.01 | DiP, DiP-A, OT       |
| 249 | Yes         | 9       | 9-A  | 100    | Bozic | Inf | last   | wholeT_0.5  | DiP, DiP-A, OT, OT-A |
| 250 | Yes         | 9       | 9-A  | 100    | Bozic | Inf | unif   | singleC     | DiP, DiP-A, OT, OT-A |
| 251 | Yes         | 9       | 9-A  | 100    | Bozic | Inf | unif   | wholeT_0.01 | DiP, DiP-A, OT, OT-A |
| 252 | Yes         | 9       | 9-A  | 100    | Bozic | Inf | unif   | wholeT_0.5  | DiP, DiP-A, OT       |
| 253 | Yes         | 9       | 9-A  | 100    | exp   | 0   | last   | singleC     | DiP, DiP-A, OT, OT-A |
| 254 | Yes         | 9       | 9-A  | 100    | exp   | 0   | last   | wholeT_0.01 | DiP, DiP-A, OT, OT-A |
| 255 | Yes         | 9       | 9-A  | 100    | exp   | 0   | last   | wholeT_0.5  | DiP, DiP-A, OT, OT-A |
| 256 | Yes         | 9       | 9-A  | 100    | exp   | 0   | unif   | singleC     | DiP, DiP-A, OT, OT-A |
| 257 | Yes         | 9       | 9-A  | 100    | exp   | 0   | unif   | wholeT_0.01 | DiP, DiP-A, OT, OT-A |
| 258 | Yes         | 9       | 9-A  | 100    | exp   | 0   | unif   | wholeT_0.5  | DiP, DiP-A, OT, OT-A |
| 259 | Yes         | 9       | 9-A  | 100    | exp   | Inf | last   | singleC     | DiP, DiP-A, OT-A     |
| 260 | Yes         | 9       | 9-A  | 100    | exp   | Inf | last   | wholeT_0.01 | DiP, DiP-A           |
| 261 | Yes         | 9       | 9-A  | 100    | exp   | Inf | last   | wholeT_0.5  | DiP, DiP-A, OT, OT-A |
| 262 | Yes         | 9       | 9-A  | 100    | exp   | Inf | unif   | singleC     | DiP, DiP-A, OT, OT-A |
| 263 | Yes         | 9       | 9-A  | 100    | exp   | Inf | unif   | wholeT_0.01 | DiP, DiP-A           |
| 264 | Yes         | 9       | 9-A  | 100    | exp   | Inf | unif   | wholeT_0.5  | DiP, DiP-A, OT, OT-A |
| 265 | Yes         | 9       | 9-A  | 100    | McF_4 | 0   | last   | singleC     | DiP, DiP-A, OT, OT-A |
| 266 | Yes         | 9       | 9-A  | 100    | McF_4 | 0   | last   | wholeT_0.01 | DiP, DiP-A           |
| 267 | Yes         | 9       | 9-A  | 100    | McF_4 | 0   | last   | wholeT_0.5  | DiP, DiP-A, OT, OT-A |
| 268 | Yes         | 9       | 9-A  | 100    | McF_4 | 0   | unif   | singleC     | DiP, OT-A            |
| 269 | Yes         | 9       | 9-A  | 100    | McF_4 | 0   | unif   | wholeT_0.01 | DiP, DiP-A           |
| 270 | Yes         | 9       | 9-A  | 100    | McF_4 | 0   | unif   | wholeT_0.5  | DiP, DiP-A, OT, OT-A |
| 271 | Yes         | 9       | 9-A  | 100    | McF_4 | Inf | last   | singleC     | DiP-A, OT, OT-A      |
| 272 | Yes         | 9       | 9-A  | 100    | McF_4 | Inf | last   | wholeT_0.01 | DiP, OT              |
| 273 | Yes         | 9       | 9-A  | 100    | McF_4 | Inf | last   | wholeT_0.5  | DiP-A, OT, OT-A      |
| 274 | Yes         | 9       | 9-A  | 100    | McF_4 | Inf | unif   | singleC     | DiP, DiP-A, OT, OT-A |
| 275 | Yes         | 9       | 9-A  | 100    | McF_4 | Inf | unif   | wholeT_0.01 | DiP, DiP-A, OT, OT-A |
| 276 | Yes         | 9       | 9-A  | 100    | McF_4 | Inf | unif   | wholeT_0.5  | DiP, DiP-A, OT-A     |
| 277 | Yes         | 9       | 9-A  | 100    | McF_6 | 0   | last   | singleC     | DiP, OT              |

Table 12: (continued)

|     | Conjunction | Drivers | Tree | S.Size | Model | sh  | S.Time | S.Type      | Best method(s)       |
|-----|-------------|---------|------|--------|-------|-----|--------|-------------|----------------------|
| 278 | Yes         | 9       | 9-A  | 100    | McF_6 | 0   | last   | wholeT_0.01 | DiP, OT              |
| 279 | Yes         | 9       | 9-A  | 100    | McF_6 | 0   | last   | wholeT_0.5  | DiP, OT              |
| 280 | Yes         | 9       | 9-A  | 100    | McF_6 | 0   | unif   | singleC     | DiP, DiP-A, OT       |
| 281 | Yes         | 9       | 9-A  | 100    | McF_6 | 0   | unif   | wholeT_0.01 | DiP, DiP-A, OT, OT-A |
| 282 | Yes         | 9       | 9-A  | 100    | McF_6 | 0   | unif   | wholeT_0.5  | DiP, OT, OT-A        |
| 283 | Yes         | 9       | 9-A  | 100    | McF_6 | Inf | last   | singleC     | DiP, DiP-A, OT       |
| 284 | Yes         | 9       | 9-A  | 100    | McF_6 | Inf | last   | wholeT_0.01 | DiP, OT              |
| 285 | Yes         | 9       | 9-A  | 100    | McF_6 | Inf | last   | wholeT_0.5  | DiP, OT              |
| 286 | Yes         | 9       | 9-A  | 100    | McF_6 | Inf | unif   | singleC     | DiP, DiP-A, OT       |
| 287 | Yes         | 9       | 9-A  | 100    | McF_6 | Inf | unif   | wholeT_0.01 | DiP, DiP-A, OT, OT-A |
| 288 | Yes         | 9       | 9-A  | 100    | McF_6 | Inf | unif   | wholeT_0.5  | DiP, DiP-A, OT, OT-A |
| 289 | Yes         | 7       | 7-A  | 1000   | Bozic | 0   | last   | singleC     | DiP, DiP-A, OT, OT-A |
| 290 | Yes         | 7       | 7-A  | 1000   | Bozic | 0   | last   | wholeT_0.01 | DiP, DiP-A           |
| 291 | Yes         | 7       | 7-A  | 1000   | Bozic | 0   | last   | wholeT_0.5  | DiP, DiP-A, OT, OT-A |
| 292 | Yes         | 7       | 7-A  | 1000   | Bozic | 0   | unif   | singleC     | DiP, DiP-A, OT, OT-A |
| 293 | Yes         | 7       | 7-A  | 1000   | Bozic | 0   | unif   | wholeT_0.01 | none                 |
| 294 | Yes         | 7       | 7-A  | 1000   | Bozic | 0   | unif   | wholeT_0.5  | DiP, DiP-A, OT, OT-A |
| 295 | Yes         | 7       | 7-A  | 1000   | Bozic | Inf | last   | singleC     | DiP, DiP-A, OT       |
| 296 | Yes         | 7       | 7-A  | 1000   | Bozic | Inf | last   | wholeT_0.01 | DiP, DiP-A, OT       |
| 297 | Yes         | 7       | 7-A  | 1000   | Bozic | Inf | last   | wholeT_0.5  | DiP, DiP-A, OT, OT-A |
| 298 | Yes         | 7       | 7-A  | 1000   | Bozic | Inf | unif   | singleC     | CBN, CBN-A, OT       |
| 299 | Yes         | 7       | 7-A  | 1000   | Bozic | Inf | unif   | wholeT_0.01 | DiP, DiP-A           |
| 300 | Yes         | 7       | 7-A  | 1000   | Bozic | Inf | unif   | wholeT_0.5  | CBN, CBN-A           |
| 301 | Yes         | 7       | 7-A  | 1000   | exp   | 0   | last   | singleC     | DiP, DiP-A, OT, OT-A |
| 302 | Yes         | 7       | 7-A  | 1000   | exp   | 0   | last   | wholeT_0.01 | DiP, DiP-A, OT, OT-A |
| 303 | Yes         | 7       | 7-A  | 1000   | exp   | 0   | last   | wholeT_0.5  | DiP, DiP-A, OT, OT-A |
| 304 | Yes         | 7       | 7-A  | 1000   | exp   | 0   | unif   | singleC     | DiP, DiP-A, OT, OT-A |
| 305 | Yes         | 7       | 7-A  | 1000   | exp   | 0   | unif   | wholeT_0.01 | DiP, DiP-A           |
| 306 | Yes         | 7       | 7-A  | 1000   | exp   | 0   | unif   | wholeT_0.5  | DiP, DiP-A, OT, OT-A |
| 307 | Yes         | 7       | 7-A  | 1000   | exp   | Inf | last   | singleC     | DiP, DiP-A, OT, OT-A |
| 308 | Yes         | 7       | 7-A  | 1000   | exp   | Inf | last   | wholeT_0.01 | DiP, DiP-A, OT, OT-A |
| 309 | Yes         | 7       | 7-A  | 1000   | exp   | Inf | last   | wholeT_0.5  | DiP, DiP-A, OT, OT-A |
| 310 | Yes         | 7       | 7-A  | 1000   | exp   | Inf | unif   | singleC     | DiP, DiP-A           |
| 311 | Yes         | 7       | 7-A  | 1000   | exp   | Inf | unif   | wholeT_0.01 | DiP-A, OT, OT-A      |
| 312 | Yes         | 7       | 7-A  | 1000   | exp   | Inf | unif   | wholeT_0.5  | DiP, DiP-A           |
| 313 | Yes         | 7       | 7-A  | 1000   | McF_4 | 0   | last   | singleC     | DiP, DiP-A, OT, OT-A |
| 314 | Yes         | 7       | 7-A  | 1000   | McF_4 | 0   | last   | wholeT_0.01 | OT, OT-A             |
| 315 | Yes         | 7       | 7-A  | 1000   | McF_4 | 0   | last   | wholeT_0.5  | DiP, DiP-A, OT       |
| 316 | Yes         | 7       | 7-A  | 1000   | McF_4 | 0   | unif   | singleC     | DiP, DiP-A           |
| 317 | Yes         | 7       | 7-A  | 1000   | McF_4 | 0   | unif   | wholeT_0.01 | DiP, DiP-A           |

Table 12: (continued)

|     | Conjunction | Drivers | Tree | S.Size | Model | sh  | S.Time | S.Type      | Best method(s)       |
|-----|-------------|---------|------|--------|-------|-----|--------|-------------|----------------------|
| 318 | Yes         | 7       | 7-A  | 1000   | McF_4 | 0   | unif   | wholeT_0.5  | DiP, DiP-A           |
| 319 | Yes         | 7       | 7-A  | 1000   | McF_4 | Inf | last   | singleC     | DiP, DiP-A, OT, OT-A |
| 320 | Yes         | 7       | 7-A  | 1000   | McF_4 | Inf | last   | wholeT_0.01 | OT, OT-A             |
| 321 | Yes         | 7       | 7-A  | 1000   | McF_4 | Inf | last   | wholeT_0.5  | DiP, DiP-A, OT, OT-A |
| 322 | Yes         | 7       | 7-A  | 1000   | McF_4 | Inf | unif   | singleC     | DiP, DiP-A, OT, OT-A |
| 323 | Yes         | 7       | 7-A  | 1000   | McF_4 | Inf | unif   | wholeT_0.01 | DiP, DiP-A, OT, OT-A |
| 324 | Yes         | 7       | 7-A  | 1000   | McF_4 | Inf | unif   | wholeT_0.5  | DiP, OT, OT-A        |
| 325 | Yes         | 7       | 7-A  | 1000   | McF_6 | 0   | last   | singleC     | DiP, OT, OT-A        |
| 326 | Yes         | 7       | 7-A  | 1000   | McF_6 | 0   | last   | wholeT_0.01 | DiP, OT, OT-A        |
| 327 | Yes         | 7       | 7-A  | 1000   | McF_6 | 0   | last   | wholeT_0.5  | DiP, OT, OT-A        |
| 328 | Yes         | 7       | 7-A  | 1000   | McF_6 | 0   | unif   | singleC     | none                 |
| 329 | Yes         | 7       | 7-A  | 1000   | McF_6 | 0   | unif   | wholeT_0.01 | none                 |
| 330 | Yes         | 7       | 7-A  | 1000   | McF_6 | 0   | unif   | wholeT_0.5  | none                 |
| 331 | Yes         | 7       | 7-A  | 1000   | McF_6 | Inf | last   | singleC     | DiP, DiP-A, OT, OT-A |
| 332 | Yes         | 7       | 7-A  | 1000   | McF_6 | Inf | last   | wholeT_0.01 | DiP, OT, OT-A        |
| 333 | Yes         | 7       | 7-A  | 1000   | McF_6 | Inf | last   | wholeT_0.5  | DiP, OT, OT-A        |
| 334 | Yes         | 7       | 7-A  | 1000   | McF_6 | Inf | unif   | singleC     | none                 |
| 335 | Yes         | 7       | 7-A  | 1000   | McF_6 | Inf | unif   | wholeT_0.01 | CBN, CBN-A, OT, OT-A |
| 336 | Yes         | 7       | 7-A  | 1000   | McF_6 | Inf | unif   | wholeT_0.5  | none                 |
| 337 | Yes         | 7       | 7-A  | 200    | Bozic | 0   | last   | singleC     | DiP, DiP-A, OT, OT-A |
| 338 | Yes         | 7       | 7-A  | 200    | Bozic | 0   | last   | wholeT_0.01 | DiP, DiP-A, OT, OT-A |
| 339 | Yes         | 7       | 7-A  | 200    | Bozic | 0   | last   | wholeT_0.5  | DiP, DiP-A, OT, OT-A |
| 340 | Yes         | 7       | 7-A  | 200    | Bozic | 0   | unif   | singleC     | DiP, DiP-A, OT, OT-A |
| 341 | Yes         | 7       | 7-A  | 200    | Bozic | 0   | unif   | wholeT_0.01 | none                 |
| 342 | Yes         | 7       | 7-A  | 200    | Bozic | 0   | unif   | wholeT_0.5  | DiP, DiP-A, OT, OT-A |
| 343 | Yes         | 7       | 7-A  | 200    | Bozic | Inf | last   | singleC     | DiP, DiP-A, OT, OT-A |
| 344 | Yes         | 7       | 7-A  | 200    | Bozic | Inf | last   | wholeT_0.01 | DiP, DiP-A, OT, OT-A |
| 345 | Yes         | 7       | 7-A  | 200    | Bozic | Inf | last   | wholeT_0.5  | DiP, DiP-A, OT, OT-A |
| 346 | Yes         | 7       | 7-A  | 200    | Bozic | Inf | unif   | singleC     | DiP, DiP-A           |
| 347 | Yes         | 7       | 7-A  | 200    | Bozic | Inf | unif   | wholeT_0.01 | DiP-A, OT, OT-A      |
| 348 | Yes         | 7       | 7-A  | 200    | Bozic | Inf | unif   | wholeT_0.5  | DiP, DiP-A           |
| 349 | Yes         | 7       | 7-A  | 200    | exp   | 0   | last   | singleC     | DiP, DiP-A, OT, OT-A |
| 350 | Yes         | 7       | 7-A  | 200    | exp   | 0   | last   | wholeT_0.01 | DiP, DiP-A           |
| 351 | Yes         | 7       | 7-A  | 200    | exp   | 0   | last   | wholeT_0.5  | DiP, DiP-A, OT, OT-A |
| 352 | Yes         | 7       | 7-A  | 200    | exp   | 0   | unif   | singleC     | DiP, DiP-A, OT, OT-A |
| 353 | Yes         | 7       | 7-A  | 200    | exp   | 0   | unif   | wholeT_0.01 | DiP, DiP-A           |
| 354 | Yes         | 7       | 7-A  | 200    | exp   | 0   | unif   | wholeT_0.5  | DiP, DiP-A, OT, OT-A |
| 355 | Yes         | 7       | 7-A  | 200    | exp   | Inf | last   | singleC     | DiP, OT, OT-A        |
| 356 | Yes         | 7       | 7-A  | 200    | exp   | Inf | last   | wholeT_0.01 | DiP, DiP-A, OT       |
| 357 | Yes         | 7       | 7-A  | 200    | exp   | Inf | last   | wholeT_0.5  | DiP, DiP-A, OT, OT-A |

Table 12: (continued)

|     | Conjunction | Drivers | Tree | S.Size | Model | sh  | S.Time | S.Type      | Best method(s)             |
|-----|-------------|---------|------|--------|-------|-----|--------|-------------|----------------------------|
| 358 | Yes         | 7       | 7-A  | 200    | exp   | Inf | unif   | singleC     | DiP, DiP-A                 |
| 359 | Yes         | 7       | 7-A  | 200    | exp   | Inf | unif   | wholeT_0.01 | DiP, DiP-A, OT, OT-A       |
| 360 | Yes         | 7       | 7-A  | 200    | exp   | Inf | unif   | wholeT_0.5  | DiP, DiP-A                 |
| 361 | Yes         | 7       | 7-A  | 200    | McF_4 | 0   | last   | singleC     | DiP, DiP-A, OT, OT-A       |
| 362 | Yes         | 7       | 7-A  | 200    | McF_4 | 0   | last   | wholeT_0.01 | DiP, DiP-A, OT, OT-A       |
| 363 | Yes         | 7       | 7-A  | 200    | McF_4 | 0   | last   | wholeT_0.5  | DiP, DiP-A                 |
| 364 | Yes         | 7       | 7-A  | 200    | McF_4 | 0   | unif   | singleC     | DiP, DiP-A, OT, OT-A       |
| 365 | Yes         | 7       | 7-A  | 200    | McF_4 | 0   | unif   | wholeT_0.01 | DiP, DiP-A                 |
| 366 | Yes         | 7       | 7-A  | 200    | McF_4 | 0   | unif   | wholeT_0.5  | DiP, DiP-A, OT             |
| 367 | Yes         | 7       | 7-A  | 200    | McF_4 | Inf | last   | singleC     | DiP, DiP-A, OT, OT-A       |
| 368 | Yes         | 7       | 7-A  | 200    | McF_4 | Inf | last   | wholeT_0.01 | DiP, DiP-A, OT, OT-A       |
| 369 | Yes         | 7       | 7-A  | 200    | McF_4 | Inf | last   | wholeT_0.5  | DiP, DiP-A, OT, OT-A       |
| 370 | Yes         | 7       | 7-A  | 200    | McF_4 | Inf | unif   | singleC     | DiP, DiP-A, OT, OT-A       |
| 371 | Yes         | 7       | 7-A  | 200    | McF_4 | Inf | unif   | wholeT_0.01 | DiP, DiP-A, OT, OT-A       |
| 372 | Yes         | 7       | 7-A  | 200    | McF_4 | Inf | unif   | wholeT_0.5  | DiP, DiP-A, OT, OT-A       |
| 373 | Yes         | 7       | 7-A  | 200    | McF_6 | 0   | last   | singleC     | DiP, OT, OT-A              |
| 374 | Yes         | 7       | 7-A  | 200    | McF_6 | 0   | last   | wholeT_0.01 | DiP, OT, OT-A              |
| 375 | Yes         | 7       | 7-A  | 200    | McF_6 | 0   | last   | wholeT_0.5  | DiP, OT, OT-A              |
| 376 | Yes         | 7       | 7-A  | 200    | McF_6 | 0   | unif   | singleC     | CBN, CBN-A, DiP, DiP-A     |
| 377 | Yes         | 7       | 7-A  | 200    | McF_6 | 0   | unif   | wholeT_0.01 | CBN, CBN-A, DiP, DiP-A, OT |
| 378 | Yes         | 7       | 7-A  | 200    | McF_6 | 0   | unif   | wholeT_0.5  | CBN, CBN-A, DiP, DiP-A     |
| 379 | Yes         | 7       | 7-A  | 200    | McF_6 | Inf | last   | singleC     | DiP, DiP-A, OT, OT-A       |
| 380 | Yes         | 7       | 7-A  | 200    | McF_6 | Inf | last   | wholeT_0.01 | OT, OT-A                   |
| 381 | Yes         | 7       | 7-A  | 200    | McF_6 | Inf | last   | wholeT_0.5  | DiP, OT, OT-A              |
| 382 | Yes         | 7       | 7-A  | 200    | McF_6 | Inf | unif   | singleC     | CBN, CBN-A, DiP, DiP-A     |
| 383 | Yes         | 7       | 7-A  | 200    | McF_6 | Inf | unif   | wholeT_0.01 | CBN, CBN-A, DiP, DiP-A     |
| 384 | Yes         | 7       | 7-A  | 200    | McF_6 | Inf | unif   | wholeT_0.5  | CBN, CBN-A, DiP, DiP-A     |
| 385 | Yes         | 7       | 7-A  | 100    | Bozic | 0   | last   | singleC     | DiP-A, OT, OT-A            |
| 386 | Yes         | 7       | 7-A  | 100    | Bozic | 0   | last   | wholeT_0.01 | DiP, DiP-A, OT, OT-A       |
| 387 | Yes         | 7       | 7-A  | 100    | Bozic | 0   | last   | wholeT_0.5  | DiP, DiP-A, OT-A           |
| 388 | Yes         | 7       | 7-A  | 100    | Bozic | 0   | unif   | singleC     | DiP, DiP-A, OT, OT-A       |
| 389 | Yes         | 7       | 7-A  | 100    | Bozic | 0   | unif   | wholeT_0.01 | CBN, DiP, DiP-A, OT, OT-A  |
| 390 | Yes         | 7       | 7-A  | 100    | Bozic | 0   | unif   | wholeT_0.5  | DiP, DiP-A, OT, OT-A       |
| 391 | Yes         | 7       | 7-A  | 100    | Bozic | Inf | last   | singleC     | DiP, DiP-A, OT, OT-A       |
| 392 | Yes         | 7       | 7-A  | 100    | Bozic | Inf | last   | wholeT_0.01 | DiP, DiP-A, OT             |
| 393 | Yes         | 7       | 7-A  | 100    | Bozic | Inf | last   | wholeT_0.5  | DiP, DiP-A, OT, OT-A       |
| 394 | Yes         | 7       | 7-A  | 100    | Bozic | Inf | unif   | singleC     | DiP, DiP-A                 |
| 395 | Yes         | 7       | 7-A  | 100    | Bozic | Inf | unif   | wholeT_0.01 | OT, OT-A                   |
| 396 | Yes         | 7       | 7-A  | 100    | Bozic | Inf | unif   | wholeT_0.5  | DiP, DiP-A                 |
| 397 | Yes         | 7       | 7-A  | 100    | exp   | 0   | last   | singleC     | DiP-A, OT, OT-A            |



Table 12: (continued)

|     | Conjunction | Drivers | Tree | S.Size | Model | sh  | S.Time | S.Type      | Best method(s)         |
|-----|-------------|---------|------|--------|-------|-----|--------|-------------|------------------------|
| 398 | Yes         | 7       | 7-A  | 100    | exp   | 0   | last   | wholeT_0.01 | DiP, DiP-A             |
| 399 | Yes         | 7       | 7-A  | 100    | exp   | 0   | last   | wholeT_0.5  | DiP, DiP-A, OT, OT-A   |
| 400 | Yes         | 7       | 7-A  | 100    | exp   | 0   | unif   | singleC     | DiP, DiP-A, OT, OT-A   |
| 401 | Yes         | 7       | 7-A  | 100    | exp   | 0   | unif   | wholeT_0.01 | DiP, DiP-A, OT-A       |
| 402 | Yes         | 7       | 7-A  | 100    | exp   | 0   | unif   | wholeT_0.5  | DiP, DiP-A, OT, OT-A   |
| 403 | Yes         | 7       | 7-A  | 100    | exp   | Inf | last   | singleC     | DiP, DiP-A, OT-A       |
| 404 | Yes         | 7       | 7-A  | 100    | exp   | Inf | last   | wholeT_0.01 | DiP, DiP-A             |
| 405 | Yes         | 7       | 7-A  | 100    | exp   | Inf | last   | wholeT_0.5  | DiP, DiP-A, OT, OT-A   |
| 406 | Yes         | 7       | 7-A  | 100    | exp   | Inf | unif   | singleC     | DiP, DiP-A, OT-A       |
| 407 | Yes         | 7       | 7-A  | 100    | exp   | Inf | unif   | wholeT_0.01 | DiP, OT, OT-A          |
| 408 | Yes         | 7       | 7-A  | 100    | exp   | Inf | unif   | wholeT_0.5  | DiP, DiP-A             |
| 409 | Yes         | 7       | 7-A  | 100    | McF_4 | 0   | last   | singleC     | DiP, DiP-A, OT, OT-A   |
| 410 | Yes         | 7       | 7-A  | 100    | McF_4 | 0   | last   | wholeT_0.01 | DiP, DiP-A, OT-A       |
| 411 | Yes         | 7       | 7-A  | 100    | McF_4 | 0   | last   | wholeT_0.5  | DiP, DiP-A, OT, OT-A   |
| 412 | Yes         | 7       | 7-A  | 100    | McF_4 | 0   | unif   | singleC     | DiP, DiP-A             |
| 413 | Yes         | 7       | 7-A  | 100    | McF_4 | 0   | unif   | wholeT_0.01 | DiP, DiP-A             |
| 414 | Yes         | 7       | 7-A  | 100    | McF_4 | 0   | unif   | wholeT_0.5  | DiP, DiP-A, OT         |
| 415 | Yes         | 7       | 7-A  | 100    | McF_4 | Inf | last   | singleC     | DiP, DiP-A, OT, OT-A   |
| 416 | Yes         | 7       | 7-A  | 100    | McF_4 | Inf | last   | wholeT_0.01 | DiP, DiP-A, OT, OT-A   |
| 417 | Yes         | 7       | 7-A  | 100    | McF_4 | Inf | last   | wholeT_0.5  | DiP, DiP-A, OT, OT-A   |
| 418 | Yes         | 7       | 7-A  | 100    | McF_4 | Inf | unif   | singleC     | DiP, DiP-A, OT         |
| 419 | Yes         | 7       | 7-A  | 100    | McF_4 | Inf | unif   | wholeT_0.01 | DiP, DiP-A, OT, OT-A   |
| 420 | Yes         | 7       | 7-A  | 100    | McF_4 | Inf | unif   | wholeT_0.5  | DiP, DiP-A, OT         |
| 421 | Yes         | 7       | 7-A  | 100    | McF_6 | 0   | last   | singleC     | DiP, DiP-A, OT, OT-A   |
| 422 | Yes         | 7       | 7-A  | 100    | McF_6 | 0   | last   | wholeT_0.01 | DiP, OT, OT-A          |
| 423 | Yes         | 7       | 7-A  | 100    | McF_6 | 0   | last   | wholeT_0.5  | DiP, OT, OT-A          |
| 424 | Yes         | 7       | 7-A  | 100    | McF_6 | 0   | unif   | singleC     | CBN, CBN-A, DiP, DiP-A |
| 425 | Yes         | 7       | 7-A  | 100    | McF_6 | 0   | unif   | wholeT_0.01 | CBN, CBN-A, DiP, DiP-A |
| 426 | Yes         | 7       | 7-A  | 100    | McF_6 | 0   | unif   | wholeT_0.5  | CBN, CBN-A, DiP, DiP-A |
| 427 | Yes         | 7       | 7-A  | 100    | McF_6 | Inf | last   | singleC     | DiP, DiP-A, OT, OT-A   |
| 428 | Yes         | 7       | 7-A  | 100    | McF_6 | Inf | last   | wholeT_0.01 | DiP, OT, OT-A          |
| 429 | Yes         | 7       | 7-A  | 100    | McF_6 | Inf | last   | wholeT_0.5  | DiP, DiP-A, OT, OT-A   |
| 430 | Yes         | 7       | 7-A  | 100    | McF_6 | Inf | unif   | singleC     | CBN, CBN-A, DiP, DiP-A |
| 431 | Yes         | 7       | 7-A  | 100    | McF_6 | Inf | unif   | wholeT_0.01 | CBN, CBN-A, DiP, DiP-A |
| 432 | Yes         | 7       | 7-A  | 100    | McF_6 | Inf | unif   | wholeT_0.5  | CBN, CBN-A, DiP, DiP-A |
| 433 | No          | 11      | 11-B | 1000   | Bozic | 0   | last   | singleC     | OT, OT-A               |
| 434 | No          | 11      | 11-B | 1000   | Bozic | 0   | last   | wholeT_0.01 | DiP, DiP-A             |
| 435 | No          | 11      | 11-B | 1000   | Bozic | 0   | last   | wholeT_0.5  | DiP, DiP-A, OT, OT-A   |
| 436 | No          | 11      | 11-B | 1000   | Bozic | 0   | unif   | singleC     | DiP, DiP-A, OT, OT-A   |
| 437 | No          | 11      | 11-B | 1000   | Bozic | 0   | unif   | wholeT_0.01 | DiP-A                  |

Table 12: (continued)

|     | Conjunction | Drivers | Tree | S.Size | Model | sh  | S.Time | S.Type      | Best method(s)       |
|-----|-------------|---------|------|--------|-------|-----|--------|-------------|----------------------|
| 438 | No          | 11      | 11-B | 1000   | Bozic | 0   | unif   | wholeT_0.5  | DiP, DiP-A, OT, OT-A |
| 439 | No          | 11      | 11-B | 1000   | Bozic | Inf | last   | singleC     | OT, OT-A             |
| 440 | No          | 11      | 11-B | 1000   | Bozic | Inf | last   | wholeT_0.01 | DiP-A                |
| 441 | No          | 11      | 11-B | 1000   | Bozic | Inf | last   | wholeT_0.5  | OT, OT-A             |
| 442 | No          | 11      | 11-B | 1000   | Bozic | Inf | unif   | singleC     | DiP, DiP-A           |
| 443 | No          | 11      | 11-B | 1000   | Bozic | Inf | unif   | wholeT_0.01 | OT, OT-A             |
| 444 | No          | 11      | 11-B | 1000   | Bozic | Inf | unif   | wholeT_0.5  | DiP, DiP-A           |
| 445 | No          | 11      | 11-B | 1000   | exp   | 0   | last   | singleC     | DiP, DiP-A, OT, OT-A |
| 446 | No          | 11      | 11-B | 1000   | exp   | 0   | last   | wholeT_0.01 | DiP, DiP-A, OT, OT-A |
| 447 | No          | 11      | 11-B | 1000   | exp   | 0   | last   | wholeT_0.5  | DiP-A, OT, OT-A      |
| 448 | No          | 11      | 11-B | 1000   | exp   | 0   | unif   | singleC     | DiP, DiP-A, OT, OT-A |
| 449 | No          | 11      | 11-B | 1000   | exp   | 0   | unif   | wholeT_0.01 | DiP, DiP-A           |
| 450 | No          | 11      | 11-B | 1000   | exp   | 0   | unif   | wholeT_0.5  | DiP, DiP-A, OT, OT-A |
| 451 | No          | 11      | 11-B | 1000   | exp   | Inf | last   | singleC     | OT, OT-A             |
| 452 | No          | 11      | 11-B | 1000   | exp   | Inf | last   | wholeT_0.01 | OT, OT-A             |
| 453 | No          | 11      | 11-B | 1000   | exp   | Inf | last   | wholeT_0.5  | OT, OT-A             |
| 454 | No          | 11      | 11-B | 1000   | exp   | Inf | unif   | singleC     | DiP, DiP-A, OT, OT-A |
| 455 | No          | 11      | 11-B | 1000   | exp   | Inf | unif   | wholeT_0.01 | DiP, DiP-A, OT, OT-A |
| 456 | No          | 11      | 11-B | 1000   | exp   | Inf | unif   | wholeT_0.5  | DiP, DiP-A, OT, OT-A |
| 457 | No          | 11      | 11-B | 1000   | McF_4 | 0   | last   | singleC     | DiP, DiP-A, OT, OT-A |
| 458 | No          | 11      | 11-B | 1000   | McF_4 | 0   | last   | wholeT_0.01 | DiP, DiP-A, OT, OT-A |
| 459 | No          | 11      | 11-B | 1000   | McF_4 | 0   | last   | wholeT_0.5  | DiP-A, OT, OT-A      |
| 460 | No          | 11      | 11-B | 1000   | McF_4 | 0   | unif   | singleC     | DiP, DiP-A           |
| 461 | No          | 11      | 11-B | 1000   | McF_4 | 0   | unif   | wholeT_0.01 | DiP-A, OT, OT-A      |
| 462 | No          | 11      | 11-B | 1000   | McF_4 | 0   | unif   | wholeT_0.5  | DiP, DiP-A, OT, OT-A |
| 463 | No          | 11      | 11-B | 1000   | McF_4 | Inf | last   | singleC     | OT, OT-A             |
| 464 | No          | 11      | 11-B | 1000   | McF_4 | Inf | last   | wholeT_0.01 | DiP, DiP-A, OT, OT-A |
| 465 | No          | 11      | 11-B | 1000   | McF_4 | Inf | last   | wholeT_0.5  | DiP-A, OT, OT-A      |
| 466 | No          | 11      | 11-B | 1000   | McF_4 | Inf | unif   | singleC     | DiP, DiP-A, OT, OT-A |
| 467 | No          | 11      | 11-B | 1000   | McF_4 | Inf | unif   | wholeT_0.01 | OT, OT-A             |
| 468 | No          | 11      | 11-B | 1000   | McF_4 | Inf | unif   | wholeT_0.5  | DiP, DiP-A, OT, OT-A |
| 469 | No          | 11      | 11-B | 1000   | McF_6 | 0   | last   | singleC     | DiP, OT              |
| 470 | No          | 11      | 11-B | 1000   | McF_6 | 0   | last   | wholeT_0.01 | DiP, OT              |
| 471 | No          | 11      | 11-B | 1000   | McF_6 | 0   | last   | wholeT_0.5  | DiP, OT              |
| 472 | No          | 11      | 11-B | 1000   | McF_6 | 0   | unif   | singleC     | DiP, DiP-A, OT       |
| 473 | No          | 11      | 11-B | 1000   | McF_6 | 0   | unif   | wholeT_0.01 | DiP, DiP-A, OT, OT-A |
| 474 | No          | 11      | 11-B | 1000   | McF_6 | 0   | unif   | wholeT_0.5  | DiP, DiP-A           |
| 475 | No          | 11      | 11-B | 1000   | McF_6 | Inf | last   | singleC     | DiP, OT              |
| 476 | No          | 11      | 11-B | 1000   | McF_6 | Inf | last   | wholeT_0.01 | DiP, OT              |
| 477 | No          | 11      | 11-B | 1000   | McF_6 | Inf | last   | wholeT_0.5  | DiP, OT              |

Table 12: (continued)

|     | Conjunction | Drivers | Tree | S.Size | Model | sh  | S.Time | S.Type      | Best method(s)       |
|-----|-------------|---------|------|--------|-------|-----|--------|-------------|----------------------|
| 478 | No          | 11      | 11-B | 1000   | McF_6 | Inf | unif   | singleC     | DiP, DiP-A           |
| 479 | No          | 11      | 11-B | 1000   | McF_6 | Inf | unif   | wholeT_0.01 | DiP, DiP-A, OT-A     |
| 480 | No          | 11      | 11-B | 1000   | McF_6 | Inf | unif   | wholeT_0.5  | DiP, DiP-A           |
| 481 | No          | 11      | 11-B | 200    | Bozic | 0   | last   | singleC     | DiP, DiP-A, OT, OT-A |
| 482 | No          | 11      | 11-B | 200    | Bozic | 0   | last   | wholeT_0.01 | DiP                  |
| 483 | No          | 11      | 11-B | 200    | Bozic | 0   | last   | wholeT_0.5  | DiP, DiP-A, OT, OT-A |
| 484 | No          | 11      | 11-B | 200    | Bozic | 0   | unif   | singleC     | DiP, DiP-A, OT, OT-A |
| 485 | No          | 11      | 11-B | 200    | Bozic | 0   | unif   | wholeT_0.01 | DiP, DiP-A           |
| 486 | No          | 11      | 11-B | 200    | Bozic | 0   | unif   | wholeT_0.5  | DiP, DiP-A, OT, OT-A |
| 487 | No          | 11      | 11-B | 200    | Bozic | Inf | last   | singleC     | DiP, DiP-A, OT, OT-A |
| 488 | No          | 11      | 11-B | 200    | Bozic | Inf | last   | wholeT_0.01 | DiP-A, OT, OT-A      |
| 489 | No          | 11      | 11-B | 200    | Bozic | Inf | last   | wholeT_0.5  | DiP, DiP-A, OT, OT-A |
| 490 | No          | 11      | 11-B | 200    | Bozic | Inf | unif   | singleC     | DiP, DiP-A           |
| 491 | No          | 11      | 11-B | 200    | Bozic | Inf | unif   | wholeT_0.01 | DiP, DiP-A           |
| 492 | No          | 11      | 11-B | 200    | Bozic | Inf | unif   | wholeT_0.5  | DiP, DiP-A           |
| 493 | No          | 11      | 11-B | 200    | exp   | 0   | last   | singleC     | DiP, DiP-A, OT, OT-A |
| 494 | No          | 11      | 11-B | 200    | exp   | 0   | last   | wholeT_0.01 | DiP, DiP-A, OT, OT-A |
| 495 | No          | 11      | 11-B | 200    | exp   | 0   | last   | wholeT_0.5  | DiP, DiP-A, OT, OT-A |
| 496 | No          | 11      | 11-B | 200    | exp   | 0   | unif   | singleC     | DiP, DiP-A, OT, OT-A |
| 497 | No          | 11      | 11-B | 200    | exp   | 0   | unif   | wholeT_0.01 | DiP, DiP-A, OT       |
| 498 | No          | 11      | 11-B | 200    | exp   | 0   | unif   | wholeT_0.5  | DiP, DiP-A, OT, OT-A |
| 499 | No          | 11      | 11-B | 200    | exp   | Inf | last   | singleC     | DiP, DiP-A, OT, OT-A |
| 500 | No          | 11      | 11-B | 200    | exp   | Inf | last   | wholeT_0.01 | DiP, OT, OT-A        |
| 501 | No          | 11      | 11-B | 200    | exp   | Inf | last   | wholeT_0.5  | DiP, DiP-A, OT, OT-A |
| 502 | No          | 11      | 11-B | 200    | exp   | Inf | unif   | singleC     | DiP, DiP-A, OT, OT-A |
| 503 | No          | 11      | 11-B | 200    | exp   | Inf | unif   | wholeT_0.01 | DiP, DiP-A           |
| 504 | No          | 11      | 11-B | 200    | exp   | Inf | unif   | wholeT_0.5  | DiP, DiP-A, OT, OT-A |
| 505 | No          | 11      | 11-B | 200    | McF_4 | 0   | last   | singleC     | DiP, DiP-A, OT, OT-A |
| 506 | No          | 11      | 11-B | 200    | McF_4 | 0   | last   | wholeT_0.01 | DiP, DiP-A, OT, OT-A |
| 507 | No          | 11      | 11-B | 200    | McF_4 | 0   | last   | wholeT_0.5  | DiP-A, OT, OT-A      |
| 508 | No          | 11      | 11-B | 200    | McF_4 | 0   | unif   | singleC     | DiP, DiP-A, OT, OT-A |
| 509 | No          | 11      | 11-B | 200    | McF_4 | 0   | unif   | wholeT_0.01 | DiP, DiP-A           |
| 510 | No          | 11      | 11-B | 200    | McF_4 | 0   | unif   | wholeT_0.5  | DiP, DiP-A, OT, OT-A |
| 511 | No          | 11      | 11-B | 200    | McF_4 | Inf | last   | singleC     | OT, OT-A             |
| 512 | No          | 11      | 11-B | 200    | McF_4 | Inf | last   | wholeT_0.01 | DiP, OT, OT-A        |
| 513 | No          | 11      | 11-B | 200    | McF_4 | Inf | last   | wholeT_0.5  | DiP, DiP-A, OT       |
| 514 | No          | 11      | 11-B | 200    | McF_4 | Inf | unif   | singleC     | DiP, DiP-A, OT, OT-A |
| 515 | No          | 11      | 11-B | 200    | McF_4 | Inf | unif   | wholeT_0.01 | DiP, DiP-A, OT, OT-A |
| 516 | No          | 11      | 11-B | 200    | McF_4 | Inf | unif   | wholeT_0.5  | DiP, DiP-A, OT, OT-A |
| 517 | No          | 11      | 11-B | 200    | McF_6 | 0   | last   | singleC     | DiP, OT              |

Table 12: (continued)

|     | Conjunction | Drivers | Tree | S.Size | Model | sh  | S.Time | S.Type      | Best method(s)              |
|-----|-------------|---------|------|--------|-------|-----|--------|-------------|-----------------------------|
| 518 | No          | 11      | 11-B | 200    | McF_6 | 0   | last   | wholeT_0.01 | DiP, OT                     |
| 519 | No          | 11      | 11-B | 200    | McF_6 | 0   | last   | wholeT_0.5  | DiP, OT                     |
| 520 | No          | 11      | 11-B | 200    | McF_6 | 0   | unif   | singleC     | DiP, DiP-A, OT, OT-A        |
| 521 | No          | 11      | 11-B | 200    | McF_6 | 0   | unif   | wholeT_0.01 | DiP, DiP-A, OT, OT-A        |
| 522 | No          | 11      | 11-B | 200    | McF_6 | 0   | unif   | wholeT_0.5  | OT, OT-A                    |
| 523 | No          | 11      | 11-B | 200    | McF_6 | Inf | last   | singleC     | DiP, OT                     |
| 524 | No          | 11      | 11-B | 200    | McF_6 | Inf | last   | wholeT_0.01 | DiP, OT                     |
| 525 | No          | 11      | 11-B | 200    | McF_6 | Inf | last   | wholeT_0.5  | DiP, OT                     |
| 526 | No          | 11      | 11-B | 200    | McF_6 | Inf | unif   | singleC     | OT, OT-A                    |
| 527 | No          | 11      | 11-B | 200    | McF_6 | Inf | unif   | wholeT_0.01 | OT, OT-A                    |
| 528 | No          | 11      | 11-B | 200    | McF_6 | Inf | unif   | wholeT_0.5  | CBN-A, DiP, DiP-A, OT, OT-A |
| 529 | No          | 11      | 11-B | 100    | Bozic | 0   | last   | singleC     | DiP, DiP-A, OT, OT-A        |
| 530 | No          | 11      | 11-B | 100    | Bozic | 0   | last   | wholeT_0.01 | DiP, DiP-A                  |
| 531 | No          | 11      | 11-B | 100    | Bozic | 0   | last   | wholeT_0.5  | DiP, DiP-A, OT              |
| 532 | No          | 11      | 11-B | 100    | Bozic | 0   | unif   | singleC     | DiP, DiP-A, OT, OT-A        |
| 533 | No          | 11      | 11-B | 100    | Bozic | 0   | unif   | wholeT_0.01 | DiP, DiP-A                  |
| 534 | No          | 11      | 11-B | 100    | Bozic | 0   | unif   | wholeT_0.5  | DiP, DiP-A, OT, OT-A        |
| 535 | No          | 11      | 11-B | 100    | Bozic | Inf | last   | singleC     | DiP, DiP-A, OT-A            |
| 536 | No          | 11      | 11-B | 100    | Bozic | Inf | last   | wholeT_0.01 | DiP, DiP-A, OT              |
| 537 | No          | 11      | 11-B | 100    | Bozic | Inf | last   | wholeT_0.5  | DiP, DiP-A, OT              |
| 538 | No          | 11      | 11-B | 100    | Bozic | Inf | unif   | singleC     | DiP, DiP-A                  |
| 539 | No          | 11      | 11-B | 100    | Bozic | Inf | unif   | wholeT_0.01 | DiP, DiP-A                  |
| 540 | No          | 11      | 11-B | 100    | Bozic | Inf | unif   | wholeT_0.5  | DiP, DiP-A, OT, OT-A        |
| 541 | No          | 11      | 11-B | 100    | exp   | 0   | last   | singleC     | DiP, DiP-A, OT, OT-A        |
| 542 | No          | 11      | 11-B | 100    | exp   | 0   | last   | wholeT_0.01 | DiP, DiP-A                  |
| 543 | No          | 11      | 11-B | 100    | exp   | 0   | last   | wholeT_0.5  | DiP, DiP-A, OT, OT-A        |
| 544 | No          | 11      | 11-B | 100    | exp   | 0   | unif   | singleC     | DiP, DiP-A, OT, OT-A        |
| 545 | No          | 11      | 11-B | 100    | exp   | 0   | unif   | wholeT_0.01 | DiP, DiP-A, OT, OT-A        |
| 546 | No          | 11      | 11-B | 100    | exp   | 0   | unif   | wholeT_0.5  | DiP, DiP-A, OT, OT-A        |
| 547 | No          | 11      | 11-B | 100    | exp   | Inf | last   | singleC     | DiP, DiP-A, OT              |
| 548 | No          | 11      | 11-B | 100    | exp   | Inf | last   | wholeT_0.01 | DiP, DiP-A, OT, OT-A        |
| 549 | No          | 11      | 11-B | 100    | exp   | Inf | last   | wholeT_0.5  | DiP, DiP-A, OT, OT-A        |
| 550 | No          | 11      | 11-B | 100    | exp   | Inf | unif   | singleC     | DiP, DiP-A, OT, OT-A        |
| 551 | No          | 11      | 11-B | 100    | exp   | Inf | unif   | wholeT_0.01 | DiP, DiP-A                  |
| 552 | No          | 11      | 11-B | 100    | exp   | Inf | unif   | wholeT_0.5  | DiP, DiP-A, OT              |
| 553 | No          | 11      | 11-B | 100    | McF_4 | 0   | last   | singleC     | DiP, DiP-A, OT              |
| 554 | No          | 11      | 11-B | 100    | McF_4 | 0   | last   | wholeT_0.01 | DiP, DiP-A, OT              |
| 555 | No          | 11      | 11-B | 100    | McF_4 | 0   | last   | wholeT_0.5  | DiP, DiP-A, OT, OT-A        |
| 556 | No          | 11      | 11-B | 100    | McF_4 | 0   | unif   | singleC     | DiP, DiP-A                  |
| 557 | No          | 11      | 11-B | 100    | McF_4 | 0   | unif   | wholeT_0.01 | DiP, DiP-A                  |

Table 12: (continued)

|     | Conjunction | Drivers | Tree | S.Size | Model | sh  | S.Time | S.Type      | Best method(s)              |
|-----|-------------|---------|------|--------|-------|-----|--------|-------------|-----------------------------|
| 558 | No          | 11      | 11-B | 100    | McF_4 | 0   | unif   | wholeT_0.5  | DiP, DiP-A, OT-A            |
| 559 | No          | 11      | 11-B | 100    | McF_4 | Inf | last   | singleC     | DiP, DiP-A, OT, OT-A        |
| 560 | No          | 11      | 11-B | 100    | McF_4 | Inf | last   | wholeT_0.01 | DiP, DiP-A, OT, OT-A        |
| 561 | No          | 11      | 11-B | 100    | McF_4 | Inf | last   | wholeT_0.5  | DiP, DiP-A, OT, OT-A        |
| 562 | No          | 11      | 11-B | 100    | McF_4 | Inf | unif   | singleC     | DiP, DiP-A, OT, OT-A        |
| 563 | No          | 11      | 11-B | 100    | McF_4 | Inf | unif   | wholeT_0.01 | DiP, DiP-A, OT, OT-A        |
| 564 | No          | 11      | 11-B | 100    | McF_4 | Inf | unif   | wholeT_0.5  | DiP, DiP-A                  |
| 565 | No          | 11      | 11-B | 100    | McF_6 | 0   | last   | singleC     | DiP, OT                     |
| 566 | No          | 11      | 11-B | 100    | McF_6 | 0   | last   | wholeT_0.01 | DiP, OT                     |
| 567 | No          | 11      | 11-B | 100    | McF_6 | 0   | last   | wholeT_0.5  | DiP, OT                     |
| 568 | No          | 11      | 11-B | 100    | McF_6 | 0   | unif   | singleC     | DiP, DiP-A                  |
| 569 | No          | 11      | 11-B | 100    | McF_6 | 0   | unif   | wholeT_0.01 | DiP, DiP-A, OT, OT-A        |
| 570 | No          | 11      | 11-B | 100    | McF_6 | 0   | unif   | wholeT_0.5  | DiP, DiP-A, OT, OT-A        |
| 571 | No          | 11      | 11-B | 100    | McF_6 | Inf | last   | singleC     | DiP, OT                     |
| 572 | No          | 11      | 11-B | 100    | McF_6 | Inf | last   | wholeT_0.01 | DiP, OT                     |
| 573 | No          | 11      | 11-B | 100    | McF_6 | Inf | last   | wholeT_0.5  | DiP, OT                     |
| 574 | No          | 11      | 11-B | 100    | McF_6 | Inf | unif   | singleC     | DiP, DiP-A, OT, OT-A        |
| 575 | No          | 11      | 11-B | 100    | McF_6 | Inf | unif   | wholeT_0.01 | DiP, DiP-A, OT, OT-A        |
| 576 | No          | 11      | 11-B | 100    | McF_6 | Inf | unif   | wholeT_0.5  | DiP, DiP-A, OT, OT-A        |
| 577 | No          | 9       | 9-B  | 1000   | Bozic | 0   | last   | singleC     | DiP-A, OT, OT-A             |
| 578 | No          | 9       | 9-B  | 1000   | Bozic | 0   | last   | wholeT_0.01 | DiP, DiP-A                  |
| 579 | No          | 9       | 9-B  | 1000   | Bozic | 0   | last   | wholeT_0.5  | DiP, DiP-A, OT-A            |
| 580 | No          | 9       | 9-B  | 1000   | Bozic | 0   | unif   | singleC     | DiP, DiP-A, OT, OT-A        |
| 581 | No          | 9       | 9-B  | 1000   | Bozic | 0   | unif   | wholeT_0.01 | DiP, DiP-A                  |
| 582 | No          | 9       | 9-B  | 1000   | Bozic | 0   | unif   | wholeT_0.5  | DiP, DiP-A                  |
| 583 | No          | 9       | 9-B  | 1000   | Bozic | Inf | last   | singleC     | OT, OT-A                    |
| 584 | No          | 9       | 9-B  | 1000   | Bozic | Inf | last   | wholeT_0.01 | DiP, DiP-A                  |
| 585 | No          | 9       | 9-B  | 1000   | Bozic | Inf | last   | wholeT_0.5  | OT, OT-A                    |
| 586 | No          | 9       | 9-B  | 1000   | Bozic | Inf | unif   | singleC     | DiP, DiP-A                  |
| 587 | No          | 9       | 9-B  | 1000   | Bozic | Inf | unif   | wholeT_0.01 | DiP, DiP-A, OT-A            |
| 588 | No          | 9       | 9-B  | 1000   | Bozic | Inf | unif   | wholeT_0.5  | DiP, DiP-A, OT-A            |
| 589 | No          | 9       | 9-B  | 1000   | exp   | 0   | last   | singleC     | DiP-A, OT, OT-A             |
| 590 | No          | 9       | 9-B  | 1000   | exp   | 0   | last   | wholeT_0.01 | DiP-A, OT, OT-A             |
| 591 | No          | 9       | 9-B  | 1000   | exp   | 0   | last   | wholeT_0.5  | DiP, DiP-A, OT, OT-A        |
| 592 | No          | 9       | 9-B  | 1000   | exp   | 0   | unif   | singleC     | DiP, DiP-A, OT, OT-A        |
| 593 | No          | 9       | 9-B  | 1000   | exp   | 0   | unif   | wholeT_0.01 | DiP, DiP-A                  |
| 594 | No          | 9       | 9-B  | 1000   | exp   | 0   | unif   | wholeT_0.5  | DiP, DiP-A, OT, OT-A        |
| 595 | No          | 9       | 9-B  | 1000   | exp   | Inf | last   | singleC     | DiP, OT, OT-A               |
| 596 | No          | 9       | 9-B  | 1000   | exp   | Inf | last   | wholeT_0.01 | CBN-A, DiP, DiP-A, OT, OT-A |
| 597 | No          | 9       | 9-B  | 1000   | exp   | Inf | last   | wholeT_0.5  | DiP, DiP-A, OT, OT-A        |

Table 12: (continued)

|     | Conjunction | Drivers | Tree | S.Size | Model | sh  | S.Time | S.Type      | Best method(s)       |
|-----|-------------|---------|------|--------|-------|-----|--------|-------------|----------------------|
| 598 | No          | 9       | 9-B  | 1000   | exp   | Inf | unif   | singleC     | DiP, DiP-A, OT, OT-A |
| 599 | No          | 9       | 9-B  | 1000   | exp   | Inf | unif   | wholeT_0.01 | DiP-A, OT, OT-A      |
| 600 | No          | 9       | 9-B  | 1000   | exp   | Inf | unif   | wholeT_0.5  | DiP, DiP-A, OT, OT-A |
| 601 | No          | 9       | 9-B  | 1000   | McF_4 | 0   | last   | singleC     | OT, OT-A             |
| 602 | No          | 9       | 9-B  | 1000   | McF_4 | 0   | last   | wholeT_0.01 | DiP, DiP-A, OT, OT-A |
| 603 | No          | 9       | 9-B  | 1000   | McF_4 | 0   | last   | wholeT_0.5  | DiP-A, OT, OT-A      |
| 604 | No          | 9       | 9-B  | 1000   | McF_4 | 0   | unif   | singleC     | DiP, DiP-A, OT, OT-A |
| 605 | No          | 9       | 9-B  | 1000   | McF_4 | 0   | unif   | wholeT_0.01 | DiP-A, OT, OT-A      |
| 606 | No          | 9       | 9-B  | 1000   | McF_4 | 0   | unif   | wholeT_0.5  | DiP, DiP-A, OT, OT-A |
| 607 | No          | 9       | 9-B  | 1000   | McF_4 | Inf | last   | singleC     | OT, OT-A             |
| 608 | No          | 9       | 9-B  | 1000   | McF_4 | Inf | last   | wholeT_0.01 | DiP, DiP-A, OT, OT-A |
| 609 | No          | 9       | 9-B  | 1000   | McF_4 | Inf | last   | wholeT_0.5  | DiP, DiP-A, OT, OT-A |
| 610 | No          | 9       | 9-B  | 1000   | McF_4 | Inf | unif   | singleC     | DiP, DiP-A, OT, OT-A |
| 611 | No          | 9       | 9-B  | 1000   | McF_4 | Inf | unif   | wholeT_0.01 | DiP-A, OT, OT-A      |
| 612 | No          | 9       | 9-B  | 1000   | McF_4 | Inf | unif   | wholeT_0.5  | DiP, DiP-A, OT, OT-A |
| 613 | No          | 9       | 9-B  | 1000   | McF_6 | 0   | last   | singleC     | DiP, OT              |
| 614 | No          | 9       | 9-B  | 1000   | McF_6 | 0   | last   | wholeT_0.01 | DiP, OT              |
| 615 | No          | 9       | 9-B  | 1000   | McF_6 | 0   | last   | wholeT_0.5  | DiP, OT              |
| 616 | No          | 9       | 9-B  | 1000   | McF_6 | 0   | unif   | singleC     | DiP, DiP-A, OT, OT-A |
| 617 | No          | 9       | 9-B  | 1000   | McF_6 | 0   | unif   | wholeT_0.01 | DiP, DiP-A, OT, OT-A |
| 618 | No          | 9       | 9-B  | 1000   | McF_6 | 0   | unif   | wholeT_0.5  | DiP, DiP-A, OT, OT-A |
| 619 | No          | 9       | 9-B  | 1000   | McF_6 | Inf | last   | singleC     | DiP, OT              |
| 620 | No          | 9       | 9-B  | 1000   | McF_6 | Inf | last   | wholeT_0.01 | DiP, OT              |
| 621 | No          | 9       | 9-B  | 1000   | McF_6 | Inf | last   | wholeT_0.5  | DiP, OT              |
| 622 | No          | 9       | 9-B  | 1000   | McF_6 | Inf | unif   | singleC     | DiP, DiP-A, OT, OT-A |
| 623 | No          | 9       | 9-B  | 1000   | McF_6 | Inf | unif   | wholeT_0.01 | DiP, DiP-A, OT, OT-A |
| 624 | No          | 9       | 9-B  | 1000   | McF_6 | Inf | unif   | wholeT_0.5  | DiP, DiP-A, OT, OT-A |
| 625 | No          | 9       | 9-B  | 200    | Bozic | 0   | last   | singleC     | DiP, DiP-A, OT       |
| 626 | No          | 9       | 9-B  | 200    | Bozic | 0   | last   | wholeT_0.01 | DiP, DiP-A           |
| 627 | No          | 9       | 9-B  | 200    | Bozic | 0   | last   | wholeT_0.5  | DiP, DiP-A, OT, OT-A |
| 628 | No          | 9       | 9-B  | 200    | Bozic | 0   | unif   | singleC     | DiP, DiP-A, OT, OT-A |
| 629 | No          | 9       | 9-B  | 200    | Bozic | 0   | unif   | wholeT_0.01 | DiP, DiP-A           |
| 630 | No          | 9       | 9-B  | 200    | Bozic | 0   | unif   | wholeT_0.5  | DiP, DiP-A, OT-A     |
| 631 | No          | 9       | 9-B  | 200    | Bozic | Inf | last   | singleC     | DiP, DiP-A, OT, OT-A |
| 632 | No          | 9       | 9-B  | 200    | Bozic | Inf | last   | wholeT_0.01 | DiP, DiP-A, OT, OT-A |
| 633 | No          | 9       | 9-B  | 200    | Bozic | Inf | last   | wholeT_0.5  | DiP, DiP-A, OT, OT-A |
| 634 | No          | 9       | 9-B  | 200    | Bozic | Inf | unif   | singleC     | DiP, DiP-A, OT, OT-A |
| 635 | No          | 9       | 9-B  | 200    | Bozic | Inf | unif   | wholeT_0.01 | DiP, OT, OT-A        |
| 636 | No          | 9       | 9-B  | 200    | Bozic | Inf | unif   | wholeT_0.5  | DiP, DiP-A           |
| 637 | No          | 9       | 9-B  | 200    | exp   | 0   | last   | singleC     | DiP, DiP-A, OT, OT-A |

Table 12: (continued)

|     | Conjunction | Drivers | Tree | S.Size | Model | sh  | S.Time | S.Type      | Best method(s)       |
|-----|-------------|---------|------|--------|-------|-----|--------|-------------|----------------------|
| 638 | No          | 9       | 9-B  | 200    | exp   | 0   | last   | wholeT_0.01 | DiP, DiP-A           |
| 639 | No          | 9       | 9-B  | 200    | exp   | 0   | last   | wholeT_0.5  | DiP, DiP-A, OT, OT-A |
| 640 | No          | 9       | 9-B  | 200    | exp   | 0   | unif   | singleC     | DiP, DiP-A, OT, OT-A |
| 641 | No          | 9       | 9-B  | 200    | exp   | 0   | unif   | wholeT_0.01 | DiP, DiP-A, OT       |
| 642 | No          | 9       | 9-B  | 200    | exp   | 0   | unif   | wholeT_0.5  | DiP, DiP-A, OT, OT-A |
| 643 | No          | 9       | 9-B  | 200    | exp   | Inf | last   | singleC     | DiP, DiP-A, OT, OT-A |
| 644 | No          | 9       | 9-B  | 200    | exp   | Inf | last   | wholeT_0.01 | DiP, DiP-A           |
| 645 | No          | 9       | 9-B  | 200    | exp   | Inf | last   | wholeT_0.5  | DiP, DiP-A, OT, OT-A |
| 646 | No          | 9       | 9-B  | 200    | exp   | Inf | unif   | singleC     | DiP, DiP-A, OT, OT-A |
| 647 | No          | 9       | 9-B  | 200    | exp   | Inf | unif   | wholeT_0.01 | DiP, DiP-A, OT, OT-A |
| 648 | No          | 9       | 9-B  | 200    | exp   | Inf | unif   | wholeT_0.5  | DiP, DiP-A, OT, OT-A |
| 649 | No          | 9       | 9-B  | 200    | McF_4 | 0   | last   | singleC     | OT, OT-A             |
| 650 | No          | 9       | 9-B  | 200    | McF_4 | 0   | last   | wholeT_0.01 | DiP, DiP-A, OT, OT-A |
| 651 | No          | 9       | 9-B  | 200    | McF_4 | 0   | last   | wholeT_0.5  | DiP, DiP-A, OT, OT-A |
| 652 | No          | 9       | 9-B  | 200    | McF_4 | 0   | unif   | singleC     | DiP, DiP-A, OT, OT-A |
| 653 | No          | 9       | 9-B  | 200    | McF_4 | 0   | unif   | wholeT_0.01 | DiP, DiP-A, OT-A     |
| 654 | No          | 9       | 9-B  | 200    | McF_4 | 0   | unif   | wholeT_0.5  | DiP, DiP-A, OT, OT-A |
| 655 | No          | 9       | 9-B  | 200    | McF_4 | Inf | last   | singleC     | OT, OT-A             |
| 656 | No          | 9       | 9-B  | 200    | McF_4 | Inf | last   | wholeT_0.01 | OT, OT-A             |
| 657 | No          | 9       | 9-B  | 200    | McF_4 | Inf | last   | wholeT_0.5  | DiP, DiP-A, OT, OT-A |
| 658 | No          | 9       | 9-B  | 200    | McF_4 | Inf | unif   | singleC     | DiP, DiP-A, OT, OT-A |
| 659 | No          | 9       | 9-B  | 200    | McF_4 | Inf | unif   | wholeT_0.01 | DiP, DiP-A, OT, OT-A |
| 660 | No          | 9       | 9-B  | 200    | McF_4 | Inf | unif   | wholeT_0.5  | DiP, DiP-A, OT, OT-A |
| 661 | No          | 9       | 9-B  | 200    | McF_6 | 0   | last   | singleC     | DiP, OT              |
| 662 | No          | 9       | 9-B  | 200    | McF_6 | 0   | last   | wholeT_0.01 | DiP, OT              |
| 663 | No          | 9       | 9-B  | 200    | McF_6 | 0   | last   | wholeT_0.5  | DiP, OT              |
| 664 | No          | 9       | 9-B  | 200    | McF_6 | 0   | unif   | singleC     | DiP, OT, OT-A        |
| 665 | No          | 9       | 9-B  | 200    | McF_6 | 0   | unif   | wholeT_0.01 | DiP, DiP-A, OT, OT-A |
| 666 | No          | 9       | 9-B  | 200    | McF_6 | 0   | unif   | wholeT_0.5  | OT, OT-A             |
| 667 | No          | 9       | 9-B  | 200    | McF_6 | Inf | last   | singleC     | DiP, OT              |
| 668 | No          | 9       | 9-B  | 200    | McF_6 | Inf | last   | wholeT_0.01 | DiP, OT              |
| 669 | No          | 9       | 9-B  | 200    | McF_6 | Inf | last   | wholeT_0.5  | DiP, OT              |
| 670 | No          | 9       | 9-B  | 200    | McF_6 | Inf | unif   | singleC     | DiP, OT, OT-A        |
| 671 | No          | 9       | 9-B  | 200    | McF_6 | Inf | unif   | wholeT_0.01 | OT, OT-A             |
| 672 | No          | 9       | 9-B  | 200    | McF_6 | Inf | unif   | wholeT_0.5  | OT, OT-A             |
| 673 | No          | 9       | 9-B  | 100    | Bozic | 0   | last   | singleC     | DiP, DiP-A, OT-A     |
| 674 | No          | 9       | 9-B  | 100    | Bozic | 0   | last   | wholeT_0.01 | DiP, DiP-A, OT       |
| 675 | No          | 9       | 9-B  | 100    | Bozic | 0   | last   | wholeT_0.5  | DiP, DiP-A, OT, OT-A |
| 676 | No          | 9       | 9-B  | 100    | Bozic | 0   | unif   | singleC     | DiP, DiP-A, OT, OT-A |
| 677 | No          | 9       | 9-B  | 100    | Bozic | 0   | unif   | wholeT_0.01 | DiP, DiP-A, OT       |

Table 12: (continued)

|     | Conjunction | Drivers | Tree | S.Size | Model | sh  | S.Time | S.Type      | Best method(s)       |
|-----|-------------|---------|------|--------|-------|-----|--------|-------------|----------------------|
| 678 | No          | 9       | 9-B  | 100    | Bozic | 0   | unif   | wholeT_0.5  | DiP, DiP-A, OT, OT-A |
| 679 | No          | 9       | 9-B  | 100    | Bozic | Inf | last   | singleC     | DiP, DiP-A, OT, OT-A |
| 680 | No          | 9       | 9-B  | 100    | Bozic | Inf | last   | wholeT_0.01 | DiP                  |
| 681 | No          | 9       | 9-B  | 100    | Bozic | Inf | last   | wholeT_0.5  | DiP, DiP-A, OT, OT-A |
| 682 | No          | 9       | 9-B  | 100    | Bozic | Inf | unif   | singleC     | DiP, DiP-A, OT       |
| 683 | No          | 9       | 9-B  | 100    | Bozic | Inf | unif   | wholeT_0.01 | DiP, DiP-A, OT, OT-A |
| 684 | No          | 9       | 9-B  | 100    | Bozic | Inf | unif   | wholeT_0.5  | DiP, DiP-A, OT-A     |
| 685 | No          | 9       | 9-B  | 100    | exp   | 0   | last   | singleC     | DiP, DiP-A, OT, OT-A |
| 686 | No          | 9       | 9-B  | 100    | exp   | 0   | last   | wholeT_0.01 | DiP, DiP-A, OT, OT-A |
| 687 | No          | 9       | 9-B  | 100    | exp   | 0   | last   | wholeT_0.5  | DiP, DiP-A, OT, OT-A |
| 688 | No          | 9       | 9-B  | 100    | exp   | 0   | unif   | singleC     | DiP, DiP-A, OT, OT-A |
| 689 | No          | 9       | 9-B  | 100    | exp   | 0   | unif   | wholeT_0.01 | DiP, DiP-A, OT       |
| 690 | No          | 9       | 9-B  | 100    | exp   | 0   | unif   | wholeT_0.5  | DiP, DiP-A, OT, OT-A |
| 691 | No          | 9       | 9-B  | 100    | exp   | Inf | last   | singleC     | DiP, DiP-A, OT, OT-A |
| 692 | No          | 9       | 9-B  | 100    | exp   | Inf | last   | wholeT_0.01 | DiP, DiP-A           |
| 693 | No          | 9       | 9-B  | 100    | exp   | Inf | last   | wholeT_0.5  | DiP, DiP-A, OT, OT-A |
| 694 | No          | 9       | 9-B  | 100    | exp   | Inf | unif   | singleC     | DiP, DiP-A, OT       |
| 695 | No          | 9       | 9-B  | 100    | exp   | Inf | unif   | wholeT_0.01 | DiP, DiP-A, OT, OT-A |
| 696 | No          | 9       | 9-B  | 100    | exp   | Inf | unif   | wholeT_0.5  | DiP, DiP-A, OT       |
| 697 | No          | 9       | 9-B  | 100    | McF_4 | 0   | last   | singleC     | DiP, DiP-A, OT, OT-A |
| 698 | No          | 9       | 9-B  | 100    | McF_4 | 0   | last   | wholeT_0.01 | DiP, DiP-A, OT, OT-A |
| 699 | No          | 9       | 9-B  | 100    | McF_4 | 0   | last   | wholeT_0.5  | DiP, DiP-A, OT, OT-A |
| 700 | No          | 9       | 9-B  | 100    | McF_4 | 0   | unif   | singleC     | DiP, DiP-A, OT-A     |
| 701 | No          | 9       | 9-B  | 100    | McF_4 | 0   | unif   | wholeT_0.01 | DiP, DiP-A           |
| 702 | No          | 9       | 9-B  | 100    | McF_4 | 0   | unif   | wholeT_0.5  | DiP, DiP-A, OT, OT-A |
| 703 | No          | 9       | 9-B  | 100    | McF_4 | Inf | last   | singleC     | DiP, DiP-A, OT, OT-A |
| 704 | No          | 9       | 9-B  | 100    | McF_4 | Inf | last   | wholeT_0.01 | DiP, DiP-A, OT, OT-A |
| 705 | No          | 9       | 9-B  | 100    | McF_4 | Inf | last   | wholeT_0.5  | DiP, DiP-A, OT, OT-A |
| 706 | No          | 9       | 9-B  | 100    | McF_4 | Inf | unif   | singleC     | DiP, DiP-A, OT, OT-A |
| 707 | No          | 9       | 9-B  | 100    | McF_4 | Inf | unif   | wholeT_0.01 | DiP, DiP-A, OT, OT-A |
| 708 | No          | 9       | 9-B  | 100    | McF_4 | Inf | unif   | wholeT_0.5  | DiP, DiP-A, OT, OT-A |
| 709 | No          | 9       | 9-B  | 100    | McF_6 | 0   | last   | singleC     | DiP, DiP-A, OT       |
| 710 | No          | 9       | 9-B  | 100    | McF_6 | 0   | last   | wholeT_0.01 | DiP, OT              |
| 711 | No          | 9       | 9-B  | 100    | McF_6 | 0   | last   | wholeT_0.5  | DiP, OT              |
| 712 | No          | 9       | 9-B  | 100    | McF_6 | 0   | unif   | singleC     | DiP, DiP-A, OT, OT-A |
| 713 | No          | 9       | 9-B  | 100    | McF_6 | 0   | unif   | wholeT_0.01 | DiP, DiP-A, OT, OT-A |
| 714 | No          | 9       | 9-B  | 100    | McF_6 | 0   | unif   | wholeT_0.5  | DiP, DiP-A, OT, OT-A |
| 715 | No          | 9       | 9-B  | 100    | McF_6 | Inf | last   | singleC     | DiP-A, OT            |
| 716 | No          | 9       | 9-B  | 100    | McF_6 | Inf | last   | wholeT_0.01 | DiP, OT              |
| 717 | No          | 9       | 9-B  | 100    | McF_6 | Inf | last   | wholeT_0.5  | DiP, DiP-A, OT       |



Table 12: (continued)

|     | Conjunction | Drivers | Tree | S.Size | Model | sh  | S.Time | S.Type      | Best method(s)              |
|-----|-------------|---------|------|--------|-------|-----|--------|-------------|-----------------------------|
| 718 | No          | 9       | 9-B  | 100    | McF_6 | Inf | unif   | singleC     | DiP, DiP-A, OT, OT-A        |
| 719 | No          | 9       | 9-B  | 100    | McF_6 | Inf | unif   | wholeT_0.01 | DiP, OT                     |
| 720 | No          | 9       | 9-B  | 100    | McF_6 | Inf | unif   | wholeT_0.5  | DiP, DiP-A, OT, OT-A        |
| 721 | No          | 7       | 7-B  | 1000   | Bozic | 0   | last   | singleC     | DiP, DiP-A, OT, OT-A        |
| 722 | No          | 7       | 7-B  | 1000   | Bozic | 0   | last   | wholeT_0.01 | DiP, DiP-A, OT, OT-A        |
| 723 | No          | 7       | 7-B  | 1000   | Bozic | 0   | last   | wholeT_0.5  | DiP, DiP-A, OT, OT-A        |
| 724 | No          | 7       | 7-B  | 1000   | Bozic | 0   | unif   | singleC     | DiP, DiP-A, OT, OT-A        |
| 725 | No          | 7       | 7-B  | 1000   | Bozic | 0   | unif   | wholeT_0.01 | CBN-A, DiP, DiP-A, OT, OT-A |
| 726 | No          | 7       | 7-B  | 1000   | Bozic | 0   | unif   | wholeT_0.5  | DiP, DiP-A, OT, OT-A        |
| 727 | No          | 7       | 7-B  | 1000   | Bozic | Inf | last   | singleC     | DiP-A, OT, OT-A             |
| 728 | No          | 7       | 7-B  | 1000   | Bozic | Inf | last   | wholeT_0.01 | none                        |
| 729 | No          | 7       | 7-B  | 1000   | Bozic | Inf | last   | wholeT_0.5  | DiP-A, OT, OT-A             |
| 730 | No          | 7       | 7-B  | 1000   | Bozic | Inf | unif   | singleC     | CBN, CBN-A, DiP             |
| 731 | No          | 7       | 7-B  | 1000   | Bozic | Inf | unif   | wholeT_0.01 | CBN, CBN-A, OT, OT-A        |
| 732 | No          | 7       | 7-B  | 1000   | Bozic | Inf | unif   | wholeT_0.5  | CBN, CBN-A, DiP, DiP-A      |
| 733 | No          | 7       | 7-B  | 1000   | exp   | 0   | last   | singleC     | DiP, DiP-A, OT              |
| 734 | No          | 7       | 7-B  | 1000   | exp   | 0   | last   | wholeT_0.01 | DiP, DiP-A, OT, OT-A        |
| 735 | No          | 7       | 7-B  | 1000   | exp   | 0   | last   | wholeT_0.5  | DiP, DiP-A, OT, OT-A        |
| 736 | No          | 7       | 7-B  | 1000   | exp   | 0   | unif   | singleC     | DiP, DiP-A, OT, OT-A        |
| 737 | No          | 7       | 7-B  | 1000   | exp   | 0   | unif   | wholeT_0.01 | DiP, DiP-A                  |
| 738 | No          | 7       | 7-B  | 1000   | exp   | 0   | unif   | wholeT_0.5  | DiP, DiP-A, OT, OT-A        |
| 739 | No          | 7       | 7-B  | 1000   | exp   | Inf | last   | singleC     | DiP, DiP-A, OT, OT-A        |
| 740 | No          | 7       | 7-B  | 1000   | exp   | Inf | last   | wholeT_0.01 | CBN, CBN-A, OT, OT-A        |
| 741 | No          | 7       | 7-B  | 1000   | exp   | Inf | last   | wholeT_0.5  | DiP, DiP-A, OT, OT-A        |
| 742 | No          | 7       | 7-B  | 1000   | exp   | Inf | unif   | singleC     | DiP, DiP-A                  |
| 743 | No          | 7       | 7-B  | 1000   | exp   | Inf | unif   | wholeT_0.01 | CBN, CBN-A, DiP, DiP-A, OT  |
| 744 | No          | 7       | 7-B  | 1000   | exp   | Inf | unif   | wholeT_0.5  | DiP, DiP-A                  |
| 745 | No          | 7       | 7-B  | 1000   | McF_4 | 0   | last   | singleC     | DiP, DiP-A, OT, OT-A        |
| 746 | No          | 7       | 7-B  | 1000   | McF_4 | 0   | last   | wholeT_0.01 | DiP, DiP-A, OT, OT-A        |
| 747 | No          | 7       | 7-B  | 1000   | McF_4 | 0   | last   | wholeT_0.5  | DiP, DiP-A, OT, OT-A        |
| 748 | No          | 7       | 7-B  | 1000   | McF_4 | 0   | unif   | singleC     | DiP, DiP-A, OT, OT-A        |
| 749 | No          | 7       | 7-B  | 1000   | McF_4 | 0   | unif   | wholeT_0.01 | DiP, DiP-A, OT, OT-A        |
| 750 | No          | 7       | 7-B  | 1000   | McF_4 | 0   | unif   | wholeT_0.5  | DiP, DiP-A, OT, OT-A        |
| 751 | No          | 7       | 7-B  | 1000   | McF_4 | Inf | last   | singleC     | DiP, OT, OT-A               |
| 752 | No          | 7       | 7-B  | 1000   | McF_4 | Inf | last   | wholeT_0.01 | DiP, DiP-A, OT, OT-A        |
| 753 | No          | 7       | 7-B  | 1000   | McF_4 | Inf | last   | wholeT_0.5  | DiP, DiP-A, OT, OT-A        |
| 754 | No          | 7       | 7-B  | 1000   | McF_4 | Inf | unif   | singleC     | DiP, DiP-A, OT, OT-A        |
| 755 | No          | 7       | 7-B  | 1000   | McF_4 | Inf | unif   | wholeT_0.01 | DiP, DiP-A, OT, OT-A        |
| 756 | No          | 7       | 7-B  | 1000   | McF_4 | Inf | unif   | wholeT_0.5  | DiP, DiP-A, OT, OT-A        |
| 757 | No          | 7       | 7-B  | 1000   | McF_6 | 0   | last   | singleC     | DiP, DiP-A, OT, OT-A        |

Table 12: (continued)

|     | Conjunction | Drivers | Tree | S.Size | Model | sh  | S.Time | S.Type      | Best method(s)       |
|-----|-------------|---------|------|--------|-------|-----|--------|-------------|----------------------|
| 758 | No          | 7       | 7-B  | 1000   | McF_6 | 0   | last   | wholeT_0.01 | DiP, DiP-A, OT, OT-A |
| 759 | No          | 7       | 7-B  | 1000   | McF_6 | 0   | last   | wholeT_0.5  | DiP, DiP-A, OT, OT-A |
| 760 | No          | 7       | 7-B  | 1000   | McF_6 | 0   | unif   | singleC     | none                 |
| 761 | No          | 7       | 7-B  | 1000   | McF_6 | 0   | unif   | wholeT_0.01 | none                 |
| 762 | No          | 7       | 7-B  | 1000   | McF_6 | 0   | unif   | wholeT_0.5  | none                 |
| 763 | No          | 7       | 7-B  | 1000   | McF_6 | Inf | last   | singleC     | DiP, DiP-A, OT, OT-A |
| 764 | No          | 7       | 7-B  | 1000   | McF_6 | Inf | last   | wholeT_0.01 | DiP, DiP-A, OT, OT-A |
| 765 | No          | 7       | 7-B  | 1000   | McF_6 | Inf | last   | wholeT_0.5  | DiP-A, OT, OT-A      |
| 766 | No          | 7       | 7-B  | 1000   | McF_6 | Inf | unif   | singleC     | none                 |
| 767 | No          | 7       | 7-B  | 1000   | McF_6 | Inf | unif   | wholeT_0.01 | none                 |
| 768 | No          | 7       | 7-B  | 1000   | McF_6 | Inf | unif   | wholeT_0.5  | none                 |
| 769 | No          | 7       | 7-B  | 200    | Bozic | 0   | last   | singleC     | DiP, DiP-A, OT, OT-A |
| 770 | No          | 7       | 7-B  | 200    | Bozic | 0   | last   | wholeT_0.01 | DiP, DiP-A, OT-A     |
| 771 | No          | 7       | 7-B  | 200    | Bozic | 0   | last   | wholeT_0.5  | DiP, DiP-A, OT-A     |
| 772 | No          | 7       | 7-B  | 200    | Bozic | 0   | unif   | singleC     | DiP, DiP-A, OT, OT-A |
| 773 | No          | 7       | 7-B  | 200    | Bozic | 0   | unif   | wholeT_0.01 | DiP, DiP-A           |
| 774 | No          | 7       | 7-B  | 200    | Bozic | 0   | unif   | wholeT_0.5  | DiP, DiP-A, OT, OT-A |
| 775 | No          | 7       | 7-B  | 200    | Bozic | Inf | last   | singleC     | DiP, DiP-A, OT, OT-A |
| 776 | No          | 7       | 7-B  | 200    | Bozic | Inf | last   | wholeT_0.01 | CBN, CBN-A, OT, OT-A |
| 777 | No          | 7       | 7-B  | 200    | Bozic | Inf | last   | wholeT_0.5  | DiP, DiP-A, OT, OT-A |
| 778 | No          | 7       | 7-B  | 200    | Bozic | Inf | unif   | singleC     | DiP                  |
| 779 | No          | 7       | 7-B  | 200    | Bozic | Inf | unif   | wholeT_0.01 | DiP-A, OT, OT-A      |
| 780 | No          | 7       | 7-B  | 200    | Bozic | Inf | unif   | wholeT_0.5  | DiP, DiP-A           |
| 781 | No          | 7       | 7-B  | 200    | exp   | 0   | last   | singleC     | DiP, DiP-A, OT, OT-A |
| 782 | No          | 7       | 7-B  | 200    | exp   | 0   | last   | wholeT_0.01 | DiP, DiP-A           |
| 783 | No          | 7       | 7-B  | 200    | exp   | 0   | last   | wholeT_0.5  | DiP, DiP-A, OT, OT-A |
| 784 | No          | 7       | 7-B  | 200    | exp   | 0   | unif   | singleC     | DiP, DiP-A, OT, OT-A |
| 785 | No          | 7       | 7-B  | 200    | exp   | 0   | unif   | wholeT_0.01 | DiP, DiP-A           |
| 786 | No          | 7       | 7-B  | 200    | exp   | 0   | unif   | wholeT_0.5  | DiP, DiP-A, OT, OT-A |
| 787 | No          | 7       | 7-B  | 200    | exp   | Inf | last   | singleC     | DiP, DiP-A, OT, OT-A |
| 788 | No          | 7       | 7-B  | 200    | exp   | Inf | last   | wholeT_0.01 | DiP, OT              |
| 789 | No          | 7       | 7-B  | 200    | exp   | Inf | last   | wholeT_0.5  | DiP, DiP-A, OT, OT-A |
| 790 | No          | 7       | 7-B  | 200    | exp   | Inf | unif   | singleC     | DiP, DiP-A           |
| 791 | No          | 7       | 7-B  | 200    | exp   | Inf | unif   | wholeT_0.01 | DiP, DiP-A           |
| 792 | No          | 7       | 7-B  | 200    | exp   | Inf | unif   | wholeT_0.5  | DiP, DiP-A           |
| 793 | No          | 7       | 7-B  | 200    | McF_4 | 0   | last   | singleC     | DiP, DiP-A, OT, OT-A |
| 794 | No          | 7       | 7-B  | 200    | McF_4 | 0   | last   | wholeT_0.01 | DiP, DiP-A, OT, OT-A |
| 795 | No          | 7       | 7-B  | 200    | McF_4 | 0   | last   | wholeT_0.5  | DiP, DiP-A, OT, OT-A |
| 796 | No          | 7       | 7-B  | 200    | McF_4 | 0   | unif   | singleC     | DiP, DiP-A, OT, OT-A |
| 797 | No          | 7       | 7-B  | 200    | McF_4 | 0   | unif   | wholeT_0.01 | DiP, DiP-A, OT, OT-A |

Table 12: (continued)

|     | Conjunction | Drivers | Tree | S.Size | Model | sh  | S.Time | S.Type      | Best method(s)         |
|-----|-------------|---------|------|--------|-------|-----|--------|-------------|------------------------|
| 798 | No          | 7       | 7-B  | 200    | McF_4 | 0   | unif   | wholeT_0.5  | DiP, DiP-A, OT, OT-A   |
| 799 | No          | 7       | 7-B  | 200    | McF_4 | Inf | last   | singleC     | DiP, DiP-A, OT, OT-A   |
| 800 | No          | 7       | 7-B  | 200    | McF_4 | Inf | last   | wholeT_0.01 | DiP, DiP-A, OT, OT-A   |
| 801 | No          | 7       | 7-B  | 200    | McF_4 | Inf | last   | wholeT_0.5  | DiP, DiP-A, OT, OT-A   |
| 802 | No          | 7       | 7-B  | 200    | McF_4 | Inf | unif   | singleC     | DiP, DiP-A, OT, OT-A   |
| 803 | No          | 7       | 7-B  | 200    | McF_4 | Inf | unif   | wholeT_0.01 | DiP, DiP-A, OT, OT-A   |
| 804 | No          | 7       | 7-B  | 200    | McF_4 | Inf | unif   | wholeT_0.5  | DiP, DiP-A, OT, OT-A   |
| 805 | No          | 7       | 7-B  | 200    | McF_6 | 0   | last   | singleC     | DiP, DiP-A, OT, OT-A   |
| 806 | No          | 7       | 7-B  | 200    | McF_6 | 0   | last   | wholeT_0.01 | DiP, OT, OT-A          |
| 807 | No          | 7       | 7-B  | 200    | McF_6 | 0   | last   | wholeT_0.5  | DiP-A, OT              |
| 808 | No          | 7       | 7-B  | 200    | McF_6 | 0   | unif   | singleC     | none                   |
| 809 | No          | 7       | 7-B  | 200    | McF_6 | 0   | unif   | wholeT_0.01 | none                   |
| 810 | No          | 7       | 7-B  | 200    | McF_6 | 0   | unif   | wholeT_0.5  | CBN, CBN-A, OT, OT-A   |
| 811 | No          | 7       | 7-B  | 200    | McF_6 | Inf | last   | singleC     | DiP, DiP-A, OT, OT-A   |
| 812 | No          | 7       | 7-B  | 200    | McF_6 | Inf | last   | wholeT_0.01 | DiP, OT, OT-A          |
| 813 | No          | 7       | 7-B  | 200    | McF_6 | Inf | last   | wholeT_0.5  | DiP, DiP-A, OT, OT-A   |
| 814 | No          | 7       | 7-B  | 200    | McF_6 | Inf | unif   | singleC     | CBN, CBN-A, OT-A       |
| 815 | No          | 7       | 7-B  | 200    | McF_6 | Inf | unif   | wholeT_0.01 | CBN, CBN-A, DiP, DiP-A |
| 816 | No          | 7       | 7-B  | 200    | McF_6 | Inf | unif   | wholeT_0.5  | CBN, CBN-A, DiP, DiP-A |
| 817 | No          | 7       | 7-B  | 100    | Bozic | 0   | last   | singleC     | DiP, DiP-A, OT         |
| 818 | No          | 7       | 7-B  | 100    | Bozic | 0   | last   | wholeT_0.01 | DiP, DiP-A, OT-A       |
| 819 | No          | 7       | 7-B  | 100    | Bozic | 0   | last   | wholeT_0.5  | DiP, DiP-A, OT, OT-A   |
| 820 | No          | 7       | 7-B  | 100    | Bozic | 0   | unif   | singleC     | DiP, DiP-A, OT, OT-A   |
| 821 | No          | 7       | 7-B  | 100    | Bozic | 0   | unif   | wholeT_0.01 | DiP, DiP-A             |
| 822 | No          | 7       | 7-B  | 100    | Bozic | 0   | unif   | wholeT_0.5  | DiP, DiP-A, OT, OT-A   |
| 823 | No          | 7       | 7-B  | 100    | Bozic | Inf | last   | singleC     | DiP, DiP-A, OT, OT-A   |
| 824 | No          | 7       | 7-B  | 100    | Bozic | Inf | last   | wholeT_0.01 | CBN, CBN-A, DiP        |
| 825 | No          | 7       | 7-B  | 100    | Bozic | Inf | last   | wholeT_0.5  | DiP, DiP-A, OT, OT-A   |
| 826 | No          | 7       | 7-B  | 100    | Bozic | Inf | unif   | singleC     | DiP, DiP-A             |
| 827 | No          | 7       | 7-B  | 100    | Bozic | Inf | unif   | wholeT_0.01 | DiP, DiP-A             |
| 828 | No          | 7       | 7-B  | 100    | Bozic | Inf | unif   | wholeT_0.5  | DiP, DiP-A             |
| 829 | No          | 7       | 7-B  | 100    | exp   | 0   | last   | singleC     | DiP, DiP-A, OT, OT-A   |
| 830 | No          | 7       | 7-B  | 100    | exp   | 0   | last   | wholeT_0.01 | DiP, DiP-A             |
| 831 | No          | 7       | 7-B  | 100    | exp   | 0   | last   | wholeT_0.5  | DiP, DiP-A, OT, OT-A   |
| 832 | No          | 7       | 7-B  | 100    | exp   | 0   | unif   | singleC     | DiP, DiP-A, OT, OT-A   |
| 833 | No          | 7       | 7-B  | 100    | exp   | 0   | unif   | wholeT_0.01 | DiP, DiP-A, OT, OT-A   |
| 834 | No          | 7       | 7-B  | 100    | exp   | 0   | unif   | wholeT_0.5  | DiP, DiP-A, OT, OT-A   |
| 835 | No          | 7       | 7-B  | 100    | exp   | Inf | last   | singleC     | DiP, DiP-A, OT, OT-A   |
| 836 | No          | 7       | 7-B  | 100    | exp   | Inf | last   | wholeT_0.01 | DiP, DiP-A             |
| 837 | No          | 7       | 7-B  | 100    | exp   | Inf | last   | wholeT_0.5  | DiP, DiP-A, OT, OT-A   |

Table 12: (continued)

|     | Conjunction | Drivers | Tree | S.Size | Model | sh  | S.Time | S.Type      | Best method(s)       |
|-----|-------------|---------|------|--------|-------|-----|--------|-------------|----------------------|
| 838 | No          | 7       | 7-B  | 100    | exp   | Inf | unif   | singleC     | DiP, DiP-A           |
| 839 | No          | 7       | 7-B  | 100    | exp   | Inf | unif   | wholeT_0.01 | DiP, DiP-A, OT, OT-A |
| 840 | No          | 7       | 7-B  | 100    | exp   | Inf | unif   | wholeT_0.5  | DiP, DiP-A           |
| 841 | No          | 7       | 7-B  | 100    | McF_4 | 0   | last   | singleC     | DiP, DiP-A, OT, OT-A |
| 842 | No          | 7       | 7-B  | 100    | McF_4 | 0   | last   | wholeT_0.01 | DiP, DiP-A, OT, OT-A |
| 843 | No          | 7       | 7-B  | 100    | McF_4 | 0   | last   | wholeT_0.5  | DiP, DiP-A, OT, OT-A |
| 844 | No          | 7       | 7-B  | 100    | McF_4 | 0   | unif   | singleC     | DiP, DiP-A           |
| 845 | No          | 7       | 7-B  | 100    | McF_4 | 0   | unif   | wholeT_0.01 | DiP, DiP-A, OT       |
| 846 | No          | 7       | 7-B  | 100    | McF_4 | 0   | unif   | wholeT_0.5  | DiP, DiP-A, OT, OT-A |
| 847 | No          | 7       | 7-B  | 100    | McF_4 | Inf | last   | singleC     | DiP, DiP-A, OT, OT-A |
| 848 | No          | 7       | 7-B  | 100    | McF_4 | Inf | last   | wholeT_0.01 | DiP, DiP-A, OT, OT-A |
| 849 | No          | 7       | 7-B  | 100    | McF_4 | Inf | last   | wholeT_0.5  | DiP, DiP-A, OT, OT-A |
| 850 | No          | 7       | 7-B  | 100    | McF_4 | Inf | unif   | singleC     | DiP, DiP-A, OT, OT-A |
| 851 | No          | 7       | 7-B  | 100    | McF_4 | Inf | unif   | wholeT_0.01 | DiP, DiP-A           |
| 852 | No          | 7       | 7-B  | 100    | McF_4 | Inf | unif   | wholeT_0.5  | DiP, DiP-A           |
| 853 | No          | 7       | 7-B  | 100    | McF_6 | 0   | last   | singleC     | DiP, DiP-A, OT       |
| 854 | No          | 7       | 7-B  | 100    | McF_6 | 0   | last   | wholeT_0.01 | DiP, OT, OT-A        |
| 855 | No          | 7       | 7-B  | 100    | McF_6 | 0   | last   | wholeT_0.5  | DiP, DiP-A, OT, OT-A |
| 856 | No          | 7       | 7-B  | 100    | McF_6 | 0   | unif   | singleC     | CBN, CBN-A, DiP, OT  |
| 857 | No          | 7       | 7-B  | 100    | McF_6 | 0   | unif   | wholeT_0.01 | CBN, CBN-A, DiP-A    |
| 858 | No          | 7       | 7-B  | 100    | McF_6 | 0   | unif   | wholeT_0.5  | CBN, CBN-A           |
| 859 | No          | 7       | 7-B  | 100    | McF_6 | Inf | last   | singleC     | DiP, DiP-A, OT, OT-A |
| 860 | No          | 7       | 7-B  | 100    | McF_6 | Inf | last   | wholeT_0.01 | DiP, OT, OT-A        |
| 861 | No          | 7       | 7-B  | 100    | McF_6 | Inf | last   | wholeT_0.5  | DiP, DiP-A, OT, OT-A |
| 862 | No          | 7       | 7-B  | 100    | McF_6 | Inf | unif   | singleC     | CBN, CBN-A           |
| 863 | No          | 7       | 7-B  | 100    | McF_6 | Inf | unif   | wholeT_0.01 | CBN, CBN-A           |
| 864 | No          | 7       | 7-B  | 100    | McF_6 | Inf | unif   | wholeT_0.5  | CBN, CBN-A           |

**5 Drivers Unknown (MCB)**

## 5.1 Confidence sets (MCB), Diff, Drivers Unknown

Table 13: Confidence sets (method MCB) when Drivers are Unknown for measure Diff.

|    | Conjunction | Drivers | Tree | S.Size | Model | sh  | S.Time | S.Type      | Best method(s)                                                                       |
|----|-------------|---------|------|--------|-------|-----|--------|-------------|--------------------------------------------------------------------------------------|
| 1  | Yes         | 11      | 11-A | 1000   | Bozic | 0   | last   | singleC     | S1:OT, S1:OT-A                                                                       |
| 2  | Yes         | 11      | 11-A | 1000   | Bozic | 0   | last   | wholeT_0.01 | S1:DiP, S1:DiP-A, S5:DiP, S5:DiP-A                                                   |
| 3  | Yes         | 11      | 11-A | 1000   | Bozic | 0   | last   | wholeT_0.5  | S1:OT, S1:OT-A                                                                       |
| 4  | Yes         | 11      | 11-A | 1000   | Bozic | 0   | unif   | singleC     | S1:DiP, S1:DiP-A, S1:OT, S1:OT-A                                                     |
| 5  | Yes         | 11      | 11-A | 1000   | Bozic | 0   | unif   | wholeT_0.01 | J1:CBN-A, J1:DiP, J1:DiP-A, S5:CBN, S5:CBN-A, S5:DiP, S5:DiP-A, S5:OT, S5:OT-A       |
| 6  | Yes         | 11      | 11-A | 1000   | Bozic | 0   | unif   | wholeT_0.5  | S1:DiP, S1:DiP-A, S1:OT, S1:OT-A, S5:DiP, S5:DiP-A, S5:OT, S5:OT-A                   |
| 7  | Yes         | 11      | 11-A | 1000   | Bozic | Inf | last   | singleC     | S5:DiP, S5:DiP-A, S5:OT, S5:OT-A                                                     |
| 8  | Yes         | 11      | 11-A | 1000   | Bozic | Inf | last   | wholeT_0.01 | J1:DiP, J1:DiP-A, J1:OT, J1:OT-A, J5:DiP, J5:DiP-A, J5:OT, J5:OT-A                   |
| 9  | Yes         | 11      | 11-A | 1000   | Bozic | Inf | last   | wholeT_0.5  | S5:DiP, S5:DiP-A, S5:OT, S5:OT-A                                                     |
| 10 | Yes         | 11      | 11-A | 1000   | Bozic | Inf | unif   | singleC     | S1:CBN, S1:CBN-A, S1:DiP, S1:DiP-A, S1:OT, S1:OT-A                                   |
| 11 | Yes         | 11      | 11-A | 1000   | Bozic | Inf | unif   | wholeT_0.01 | J1:CBN, J1:CBN-A, S5:CBN, S5:CBN-A, S5:OT, S5:OT-A                                   |
| 12 | Yes         | 11      | 11-A | 1000   | Bozic | Inf | unif   | wholeT_0.5  | J1:DiP, J1:DiP-A, J1:OT, J1:OT-A, S1:CBN, S1:CBN-A, S1:DiP-A, S1:OT, S1:OT-A, S5:DiP |
| 13 | Yes         | 11      | 11-A | 1000   | exp   | 0   | last   | singleC     | S1:OT, S1:OT-A                                                                       |
| 14 | Yes         | 11      | 11-A | 1000   | exp   | 0   | last   | wholeT_0.01 | S1:DiP-A, S1:OT, S1:OT-A, S5:DiP-A, S5:OT-A                                          |
| 15 | Yes         | 11      | 11-A | 1000   | exp   | 0   | last   | wholeT_0.5  | S1:OT, S1:OT-A                                                                       |
| 16 | Yes         | 11      | 11-A | 1000   | exp   | 0   | unif   | singleC     | S1:DiP, S1:DiP-A, S1:OT, S1:OT-A, S5:DiP, S5:DiP-A, S5:OT, S5:OT-A                   |
| 17 | Yes         | 11      | 11-A | 1000   | exp   | 0   | unif   | wholeT_0.01 | S1:CBN-A, S1:DiP, S1:DiP-A, S1:OT, S1:OT-A                                           |
| 18 | Yes         | 11      | 11-A | 1000   | exp   | 0   | unif   | wholeT_0.5  | S1:DiP, S1:DiP-A, S1:OT, S1:OT-A, S5:DiP, S5:DiP-A, S5:OT, S5:OT-A                   |
| 19 | Yes         | 11      | 11-A | 1000   | exp   | Inf | last   | singleC     | S5:DiP, S5:DiP-A, S5:OT, S5:OT-A                                                     |
| 20 | Yes         | 11      | 11-A | 1000   | exp   | Inf | last   | wholeT_0.01 | S5:DiP, S5:DiP-A, S5:OT, S5:OT-A                                                     |
| 21 | Yes         | 11      | 11-A | 1000   | exp   | Inf | last   | wholeT_0.5  | S5:DiP, S5:DiP-A, S5:OT, S5:OT-A                                                     |
| 22 | Yes         | 11      | 11-A | 1000   | exp   | Inf | unif   | singleC     | S1:CBN, S1:CBN-A, S1:OT, S1:OT-A                                                     |
| 23 | Yes         | 11      | 11-A | 1000   | exp   | Inf | unif   | wholeT_0.01 | J1:CBN-A, J1:OT, J1:OT-A, J5:OT-A, S5:DiP, S5:DiP-A, S5:OT, S5:OT-A                  |
| 24 | Yes         | 11      | 11-A | 1000   | exp   | Inf | unif   | wholeT_0.5  | S1:CBN, S1:CBN-A, S1:OT, S1:OT-A                                                     |

Table 13: (continued)

|    | Conjunction | Drivers | Tree | S.Size | Model | sh  | S.Time | S.Type      | Best method(s)                                                                                         |
|----|-------------|---------|------|--------|-------|-----|--------|-------------|--------------------------------------------------------------------------------------------------------|
| 25 | Yes         | 11      | 11-A | 1000   | McF_4 | 0   | last   | singleC     | S1:DiP-A, S1:OT, S1:OT-A                                                                               |
| 26 | Yes         | 11      | 11-A | 1000   | McF_4 | 0   | last   | wholeT_0.01 | S1:OT, S1:OT-A, S5:DiP, S5:DiP-A, S5:OT, S5:OT-A                                                       |
| 27 | Yes         | 11      | 11-A | 1000   | McF_4 | 0   | last   | wholeT_0.5  | S1:DiP-A, S1:OT, S1:OT-A                                                                               |
| 28 | Yes         | 11      | 11-A | 1000   | McF_4 | 0   | unif   | singleC     | S1:DiP, S1:DiP-A, S1:OT, S1:OT-A                                                                       |
| 29 | Yes         | 11      | 11-A | 1000   | McF_4 | 0   | unif   | wholeT_0.01 | S1:OT, S1:OT-A, S5:DiP, S5:DiP-A, S5:OT, S5:OT-A                                                       |
| 30 | Yes         | 11      | 11-A | 1000   | McF_4 | 0   | unif   | wholeT_0.5  | S1:DiP, S1:DiP-A, S1:OT, S1:OT-A, S5:DiP, S5:DiP-A, S5:OT, S5:OT-A                                     |
| 31 | Yes         | 11      | 11-A | 1000   | McF_4 | Inf | last   | singleC     | S1:OT, S1:OT-A                                                                                         |
| 32 | Yes         | 11      | 11-A | 1000   | McF_4 | Inf | last   | wholeT_0.01 | S5:DiP, S5:OT, S5:OT-A                                                                                 |
| 33 | Yes         | 11      | 11-A | 1000   | McF_4 | Inf | last   | wholeT_0.5  | S1:DiP-A, S1:OT, S1:OT-A                                                                               |
| 34 | Yes         | 11      | 11-A | 1000   | McF_4 | Inf | unif   | singleC     | S1:OT, S1:OT-A                                                                                         |
| 35 | Yes         | 11      | 11-A | 1000   | McF_4 | Inf | unif   | wholeT_0.01 | S5:DiP, S5:DiP-A, S5:OT, S5:OT-A                                                                       |
| 36 | Yes         | 11      | 11-A | 1000   | McF_4 | Inf | unif   | wholeT_0.5  | S1:OT, S1:OT-A                                                                                         |
| 37 | Yes         | 11      | 11-A | 1000   | McF_6 | 0   | last   | singleC     | S1:DiP, S1:OT                                                                                          |
| 38 | Yes         | 11      | 11-A | 1000   | McF_6 | 0   | last   | wholeT_0.01 | S5:DiP                                                                                                 |
| 39 | Yes         | 11      | 11-A | 1000   | McF_6 | 0   | last   | wholeT_0.5  | S1:DiP, S5:DiP                                                                                         |
| 40 | Yes         | 11      | 11-A | 1000   | McF_6 | 0   | unif   | singleC     | S1:DiP, S1:DiP-A                                                                                       |
| 41 | Yes         | 11      | 11-A | 1000   | McF_6 | 0   | unif   | wholeT_0.01 | S1:DiP, S1:DiP-A, S1:OT, S1:OT-A                                                                       |
| 42 | Yes         | 11      | 11-A | 1000   | McF_6 | 0   | unif   | wholeT_0.5  | S1:DiP, S1:DiP-A, S1:OT, S1:OT-A                                                                       |
| 43 | Yes         | 11      | 11-A | 1000   | McF_6 | Inf | last   | singleC     | S1:DiP, S1:OT, S5:OT                                                                                   |
| 44 | Yes         | 11      | 11-A | 1000   | McF_6 | Inf | last   | wholeT_0.01 | S5:OT                                                                                                  |
| 45 | Yes         | 11      | 11-A | 1000   | McF_6 | Inf | last   | wholeT_0.5  | S1:DiP, S1:OT                                                                                          |
| 46 | Yes         | 11      | 11-A | 1000   | McF_6 | Inf | unif   | singleC     | S1:DiP, S1:DiP-A                                                                                       |
| 47 | Yes         | 11      | 11-A | 1000   | McF_6 | Inf | unif   | wholeT_0.01 | S1:DiP, S1:DiP-A, S5:DiP, S5:DiP-A, S5:OT, S5:OT-A                                                     |
| 48 | Yes         | 11      | 11-A | 1000   | McF_6 | Inf | unif   | wholeT_0.5  | S1:DiP, S1:DiP-A                                                                                       |
| 49 | Yes         | 11      | 11-A | 200    | Bozic | 0   | last   | singleC     | S1:OT, S1:OT-A                                                                                         |
| 50 | Yes         | 11      | 11-A | 200    | Bozic | 0   | last   | wholeT_0.01 | J1:OT, J1:OT-A, J5:OT-A, S5:OT, S5:OT-A                                                                |
| 51 | Yes         | 11      | 11-A | 200    | Bozic | 0   | last   | wholeT_0.5  | S1:OT, S1:OT-A                                                                                         |
| 52 | Yes         | 11      | 11-A | 200    | Bozic | 0   | unif   | singleC     | S1:OT, S1:OT-A, S5:OT                                                                                  |
| 53 | Yes         | 11      | 11-A | 200    | Bozic | 0   | unif   | wholeT_0.01 | J1:CBN, J1:CBN-A, J1:DiP, J1:DiP-A, J1:OT, J1:OT-A, S5:CBN, S5:CBN-A, S5:DiP, S5:DiP-A, S5:OT, S5:OT-A |
| 54 | Yes         | 11      | 11-A | 200    | Bozic | 0   | unif   | wholeT_0.5  | S1:OT, S1:OT-A, S5:DiP, S5:DiP-A, S5:OT, S5:OT-A                                                       |
| 55 | Yes         | 11      | 11-A | 200    | Bozic | Inf | last   | singleC     | S5:OT, S5:OT-A                                                                                         |
| 56 | Yes         | 11      | 11-A | 200    | Bozic | Inf | last   | wholeT_0.01 | J5:OT, J5:OT-A                                                                                         |

Table 13: (continued)

|    | Conjunction | Drivers | Tree | S.Size | Model | sh  | S.Time | S.Type      | Best method(s)                                                     |
|----|-------------|---------|------|--------|-------|-----|--------|-------------|--------------------------------------------------------------------|
| 57 | Yes         | 11      | 11-A | 200    | Bozic | Inf | last   | wholeT_0.5  | S5:OT, S5:OT-A                                                     |
| 58 | Yes         | 11      | 11-A | 200    | Bozic | Inf | unif   | singleC     | J1:CBN, J1:CBN-A, J1:OT, J1:OT-A                                   |
| 59 | Yes         | 11      | 11-A | 200    | Bozic | Inf | unif   | wholeT_0.01 | J5:OT, J5:OT-A, S5:CBN, S5:CBN-A, S5:OT, S5:OT-A                   |
| 60 | Yes         | 11      | 11-A | 200    | Bozic | Inf | unif   | wholeT_0.5  | J1:CBN-A, J1:OT, J1:OT-A                                           |
| 61 | Yes         | 11      | 11-A | 200    | exp   | 0   | last   | singleC     | S1:OT, S1:OT-A                                                     |
| 62 | Yes         | 11      | 11-A | 200    | exp   | 0   | last   | wholeT_0.01 | S1:OT, S1:OT-A, S5:OT, S5:OT-A                                     |
| 63 | Yes         | 11      | 11-A | 200    | exp   | 0   | last   | wholeT_0.5  | S1:OT, S1:OT-A                                                     |
| 64 | Yes         | 11      | 11-A | 200    | exp   | 0   | unif   | singleC     | S1:DiP, S1:DiP-A, S1:OT, S1:OT-A, S5:DiP, S5:DiP-A, S5:OT, S5:OT-A |
| 65 | Yes         | 11      | 11-A | 200    | exp   | 0   | unif   | wholeT_0.01 | S1:OT, S1:OT-A                                                     |
| 66 | Yes         | 11      | 11-A | 200    | exp   | 0   | unif   | wholeT_0.5  | S1:DiP, S1:DiP-A, S1:OT, S1:OT-A, S5:DiP, S5:DiP-A, S5:OT, S5:OT-A |
| 67 | Yes         | 11      | 11-A | 200    | exp   | Inf | last   | singleC     | S5:OT, S5:OT-A                                                     |
| 68 | Yes         | 11      | 11-A | 200    | exp   | Inf | last   | wholeT_0.01 | J5:OT, J5:OT-A                                                     |
| 69 | Yes         | 11      | 11-A | 200    | exp   | Inf | last   | wholeT_0.5  | S5:OT, S5:OT-A                                                     |
| 70 | Yes         | 11      | 11-A | 200    | exp   | Inf | unif   | singleC     | S1:OT, S1:OT-A                                                     |
| 71 | Yes         | 11      | 11-A | 200    | exp   | Inf | unif   | wholeT_0.01 | J5:DiP-A, S5:CBN-A, S5:OT, S5:OT-A                                 |
| 72 | Yes         | 11      | 11-A | 200    | exp   | Inf | unif   | wholeT_0.5  | S1:OT, S1:OT-A                                                     |
| 73 | Yes         | 11      | 11-A | 200    | McF_4 | 0   | last   | singleC     | S1:OT, S1:OT-A, S5:OT, S5:OT-A                                     |
| 74 | Yes         | 11      | 11-A | 200    | McF_4 | 0   | last   | wholeT_0.01 | S1:OT, S1:OT-A, S5:OT, S5:OT-A                                     |
| 75 | Yes         | 11      | 11-A | 200    | McF_4 | 0   | last   | wholeT_0.5  | S1:OT, S1:OT-A, S5:OT, S5:OT-A                                     |
| 76 | Yes         | 11      | 11-A | 200    | McF_4 | 0   | unif   | singleC     | S5:CBN-A, S5:OT, S5:OT-A                                           |
| 77 | Yes         | 11      | 11-A | 200    | McF_4 | 0   | unif   | wholeT_0.01 | S5:OT, S5:OT-A                                                     |
| 78 | Yes         | 11      | 11-A | 200    | McF_4 | 0   | unif   | wholeT_0.5  | S5:OT, S5:OT-A                                                     |
| 79 | Yes         | 11      | 11-A | 200    | McF_4 | Inf | last   | singleC     | S1:OT, S1:OT-A, S5:OT, S5:OT-A                                     |
| 80 | Yes         | 11      | 11-A | 200    | McF_4 | Inf | last   | wholeT_0.01 | S5:OT, S5:OT-A                                                     |
| 81 | Yes         | 11      | 11-A | 200    | McF_4 | Inf | last   | wholeT_0.5  | S5:OT, S5:OT-A                                                     |
| 82 | Yes         | 11      | 11-A | 200    | McF_4 | Inf | unif   | singleC     | S5:CBN-A, S5:OT, S5:OT-A                                           |
| 83 | Yes         | 11      | 11-A | 200    | McF_4 | Inf | unif   | wholeT_0.01 | S5:CBN-A, S5:OT, S5:OT-A                                           |
| 84 | Yes         | 11      | 11-A | 200    | McF_4 | Inf | unif   | wholeT_0.5  | S1:OT, S1:OT-A, S5:CBN-A, S5:OT, S5:OT-A                           |
| 85 | Yes         | 11      | 11-A | 200    | McF_6 | 0   | last   | singleC     | S1:OT, S5:OT                                                       |
| 86 | Yes         | 11      | 11-A | 200    | McF_6 | 0   | last   | wholeT_0.01 | S5:OT                                                              |
| 87 | Yes         | 11      | 11-A | 200    | McF_6 | 0   | last   | wholeT_0.5  | S1:OT, S5:OT                                                       |
| 88 | Yes         | 11      | 11-A | 200    | McF_6 | 0   | unif   | singleC     | J1:CBN, J1:CBN-A, S1:OT, S1:OT-A, S5:CBN, S5:CBN-A, S5:OT, S5:OT-A |
| 89 | Yes         | 11      | 11-A | 200    | McF_6 | 0   | unif   | wholeT_0.01 | S1:OT, S1:OT-A, S5:CBN, S5:CBN-A, S5:OT, S5:OT-A                   |



Table 13: (continued)

|     | Conjunction | Drivers | Tree | S.Size | Model | sh  | S.Time | S.Type      | Best method(s)                                                              |
|-----|-------------|---------|------|--------|-------|-----|--------|-------------|-----------------------------------------------------------------------------|
| 90  | Yes         | 11      | 11-A | 200    | McF_6 | 0   | unif   | wholeT_0.5  | J1:CBN, J1:CBN-A, S1:OT, S1:OT-A, S5:CBN, S5:CBN-A, S5:OT, S5:OT-A          |
| 91  | Yes         | 11      | 11-A | 200    | McF_6 | Inf | last   | singleC     | S1:OT, S5:OT                                                                |
| 92  | Yes         | 11      | 11-A | 200    | McF_6 | Inf | last   | wholeT_0.01 | S5:OT, S5:OT-A                                                              |
| 93  | Yes         | 11      | 11-A | 200    | McF_6 | Inf | last   | wholeT_0.5  | S1:OT, S5:OT                                                                |
| 94  | Yes         | 11      | 11-A | 200    | McF_6 | Inf | unif   | singleC     | J1:CBN-A, S1:OT, S1:OT-A, S5:CBN, S5:CBN-A, S5:OT, S5:OT-A                  |
| 95  | Yes         | 11      | 11-A | 200    | McF_6 | Inf | unif   | wholeT_0.01 | J1:CBN-A, S5:CBN, S5:CBN-A, S5:OT, S5:OT-A                                  |
| 96  | Yes         | 11      | 11-A | 200    | McF_6 | Inf | unif   | wholeT_0.5  | J1:CBN-A, J1:OT, S1:CBN-A, S1:OT, S1:OT-A, S5:CBN, S5:CBN-A, S5:OT, S5:OT-A |
| 97  | Yes         | 11      | 11-A | 100    | Bozic | 0   | last   | singleC     | S5:OT, S5:OT-A                                                              |
| 98  | Yes         | 11      | 11-A | 100    | Bozic | 0   | last   | wholeT_0.01 | J5:OT, J5:OT-A, S5:OT, S5:OT-A                                              |
| 99  | Yes         | 11      | 11-A | 100    | Bozic | 0   | last   | wholeT_0.5  | S1:OT, S1:OT-A, S5:OT, S5:OT-A                                              |
| 100 | Yes         | 11      | 11-A | 100    | Bozic | 0   | unif   | singleC     | J1:OT, J1:OT-A, S5:DiP, S5:DiP-A, S5:OT, S5:OT-A                            |
| 101 | Yes         | 11      | 11-A | 100    | Bozic | 0   | unif   | wholeT_0.01 | J1:OT, J1:OT-A, S5:OT, S5:OT-A                                              |
| 102 | Yes         | 11      | 11-A | 100    | Bozic | 0   | unif   | wholeT_0.5  | S5:DiP, S5:DiP-A, S5:OT, S5:OT-A                                            |
| 103 | Yes         | 11      | 11-A | 100    | Bozic | Inf | last   | singleC     | J1:OT, J1:OT-A, J5:OT, J5:OT-A, S5:OT, S5:OT-A                              |
| 104 | Yes         | 11      | 11-A | 100    | Bozic | Inf | last   | wholeT_0.01 | J5:CBN-A, J5:OT, J5:OT-A                                                    |
| 105 | Yes         | 11      | 11-A | 100    | Bozic | Inf | last   | wholeT_0.5  | J1:OT, J1:OT-A, J5:OT, J5:OT-A, S5:OT, S5:OT-A                              |
| 106 | Yes         | 11      | 11-A | 100    | Bozic | Inf | unif   | singleC     | S5:OT, S5:OT-A                                                              |
| 107 | Yes         | 11      | 11-A | 100    | Bozic | Inf | unif   | wholeT_0.01 | J5:OT, J5:OT-A, S5:OT, S5:OT-A                                              |
| 108 | Yes         | 11      | 11-A | 100    | Bozic | Inf | unif   | wholeT_0.5  | S5:DiP-A, S5:OT, S5:OT-A                                                    |
| 109 | Yes         | 11      | 11-A | 100    | exp   | 0   | last   | singleC     | S1:OT, S1:OT-A                                                              |
| 110 | Yes         | 11      | 11-A | 100    | exp   | 0   | last   | wholeT_0.01 | S1:OT, S1:OT-A, S5:OT, S5:OT-A                                              |
| 111 | Yes         | 11      | 11-A | 100    | exp   | 0   | last   | wholeT_0.5  | S1:OT-A                                                                     |
| 112 | Yes         | 11      | 11-A | 100    | exp   | 0   | unif   | singleC     | S1:OT, S1:OT-A, S5:DiP, S5:DiP-A, S5:OT, S5:OT-A                            |
| 113 | Yes         | 11      | 11-A | 100    | exp   | 0   | unif   | wholeT_0.01 | J1:OT, J1:OT-A, S1:OT, S1:OT-A, S5:DiP, S5:DiP-A, S5:OT, S5:OT-A            |
| 114 | Yes         | 11      | 11-A | 100    | exp   | 0   | unif   | wholeT_0.5  | S1:OT, S1:OT-A, S5:DiP, S5:DiP-A, S5:OT, S5:OT-A                            |
| 115 | Yes         | 11      | 11-A | 100    | exp   | Inf | last   | singleC     | S5:OT, S5:OT-A                                                              |
| 116 | Yes         | 11      | 11-A | 100    | exp   | Inf | last   | wholeT_0.01 | J5:CBN-A, J5:OT, J5:OT-A                                                    |
| 117 | Yes         | 11      | 11-A | 100    | exp   | Inf | last   | wholeT_0.5  | S5:OT, S5:OT-A                                                              |

Table 13: (continued)

|     | Conjunction | Drivers | Tree | S.Size | Model | sh  | S.Time | S.Type      | Best method(s)                                                      |
|-----|-------------|---------|------|--------|-------|-----|--------|-------------|---------------------------------------------------------------------|
| 118 | Yes         | 11      | 11-A | 100    | exp   | Inf | unif   | singleC     | J1:CBN-A, J1:OT, J1:OT-A, S1:OT-A, S5:DiP, S5:DiP-A, S5:OT, S5:OT-A |
| 119 | Yes         | 11      | 11-A | 100    | exp   | Inf | unif   | wholeT_0.01 | J5:OT, J5:OT-A, S5:OT, S5:OT-A                                      |
| 120 | Yes         | 11      | 11-A | 100    | exp   | Inf | unif   | wholeT_0.5  | J1:OT, J1:OT-A, S5:DiP, S5:DiP-A, S5:OT, S5:OT-A                    |
| 121 | Yes         | 11      | 11-A | 100    | McF_4 | 0   | last   | singleC     | S5:OT, S5:OT-A                                                      |
| 122 | Yes         | 11      | 11-A | 100    | McF_4 | 0   | last   | wholeT_0.01 | S5:OT, S5:OT-A                                                      |
| 123 | Yes         | 11      | 11-A | 100    | McF_4 | 0   | last   | wholeT_0.5  | S5:OT, S5:OT-A                                                      |
| 124 | Yes         | 11      | 11-A | 100    | McF_4 | 0   | unif   | singleC     | S5:CBN, S5:CBN-A, S5:OT, S5:OT-A                                    |
| 125 | Yes         | 11      | 11-A | 100    | McF_4 | 0   | unif   | wholeT_0.01 | S5:CBN-A, S5:OT, S5:OT-A                                            |
| 126 | Yes         | 11      | 11-A | 100    | McF_4 | 0   | unif   | wholeT_0.5  | S5:CBN, S5:CBN-A, S5:OT, S5:OT-A                                    |
| 127 | Yes         | 11      | 11-A | 100    | McF_4 | Inf | last   | singleC     | S1:OT, S1:OT-A, S5:OT, S5:OT-A                                      |
| 128 | Yes         | 11      | 11-A | 100    | McF_4 | Inf | last   | wholeT_0.01 | S5:OT, S5:OT-A                                                      |
| 129 | Yes         | 11      | 11-A | 100    | McF_4 | Inf | last   | wholeT_0.5  | S5:OT, S5:OT-A                                                      |
| 130 | Yes         | 11      | 11-A | 100    | McF_4 | Inf | unif   | singleC     | S5:CBN-A, S5:OT, S5:OT-A                                            |
| 131 | Yes         | 11      | 11-A | 100    | McF_4 | Inf | unif   | wholeT_0.01 | S5:CBN-A, S5:OT, S5:OT-A                                            |
| 132 | Yes         | 11      | 11-A | 100    | McF_4 | Inf | unif   | wholeT_0.5  | S5:CBN, S5:CBN-A, S5:OT, S5:OT-A                                    |
| 133 | Yes         | 11      | 11-A | 100    | McF_6 | 0   | last   | singleC     | S1:OT, S5:OT                                                        |
| 134 | Yes         | 11      | 11-A | 100    | McF_6 | 0   | last   | wholeT_0.01 | S5:OT, S5:OT-A                                                      |
| 135 | Yes         | 11      | 11-A | 100    | McF_6 | 0   | last   | wholeT_0.5  | S5:OT                                                               |
| 136 | Yes         | 11      | 11-A | 100    | McF_6 | 0   | unif   | singleC     | J1:CBN-A, S5:CBN, S5:CBN-A, S5:OT, S5:OT-A                          |
| 137 | Yes         | 11      | 11-A | 100    | McF_6 | 0   | unif   | wholeT_0.01 | S5:CBN, S5:OT, S5:OT-A                                              |
| 138 | Yes         | 11      | 11-A | 100    | McF_6 | 0   | unif   | wholeT_0.5  | J1:CBN, J1:CBN-A, S1:OT, S1:OT-A, S5:CBN, S5:CBN-A, S5:OT, S5:OT-A  |
| 139 | Yes         | 11      | 11-A | 100    | McF_6 | Inf | last   | singleC     | S5:OT                                                               |
| 140 | Yes         | 11      | 11-A | 100    | McF_6 | Inf | last   | wholeT_0.01 | S5:OT, S5:OT-A                                                      |
| 141 | Yes         | 11      | 11-A | 100    | McF_6 | Inf | last   | wholeT_0.5  | S5:OT                                                               |
| 142 | Yes         | 11      | 11-A | 100    | McF_6 | Inf | unif   | singleC     | J1:CBN, J1:CBN-A, S1:OT, S1:OT-A, S5:CBN, S5:CBN-A, S5:OT, S5:OT-A  |
| 143 | Yes         | 11      | 11-A | 100    | McF_6 | Inf | unif   | wholeT_0.01 | S5:CBN, S5:CBN-A, S5:OT, S5:OT-A                                    |
| 144 | Yes         | 11      | 11-A | 100    | McF_6 | Inf | unif   | wholeT_0.5  | J1:CBN-A, S1:OT, S1:OT-A, S5:CBN, S5:CBN-A, S5:OT, S5:OT-A          |
| 145 | Yes         | 9       | 9-A  | 1000   | Bozic | 0   | last   | singleC     | S1:OT, S1:OT-A                                                      |
| 146 | Yes         | 9       | 9-A  | 1000   | Bozic | 0   | last   | wholeT_0.01 | S1:DiP, S1:DiP-A, S1:OT, S1:OT-A, S5:DiP, S5:DiP-A, S5:OT, S5:OT-A  |
| 147 | Yes         | 9       | 9-A  | 1000   | Bozic | 0   | last   | wholeT_0.5  | S1:OT, S1:OT-A                                                      |
| 148 | Yes         | 9       | 9-A  | 1000   | Bozic | 0   | unif   | singleC     | S1:DiP, S1:DiP-A, S1:OT, S1:OT-A, S5:DiP, S5:DiP-A, S5:OT, S5:OT-A  |

Table 13: (continued)

|     | Conjunction | Drivers | Tree | S.Size | Model | sh  | S.Time | S.Type      | Best method(s)                                                     |
|-----|-------------|---------|------|--------|-------|-----|--------|-------------|--------------------------------------------------------------------|
| 149 | Yes         | 9       | 9-A  | 1000   | Bozic | 0   | unif   | wholeT_0.01 | J1:DiP, J1:DiP-A, J1:OT, J1:OT-A, S1:DiP, S1:DiP-A, S1:OT, S1:OT-A |
| 150 | Yes         | 9       | 9-A  | 1000   | Bozic | 0   | unif   | wholeT_0.5  | S1:DiP, S1:DiP-A, S1:OT, S1:OT-A, S5:DiP, S5:DiP-A, S5:OT, S5:OT-A |
| 151 | Yes         | 9       | 9-A  | 1000   | Bozic | Inf | last   | singleC     | S5:DiP, S5:DiP-A, S5:OT, S5:OT-A                                   |
| 152 | Yes         | 9       | 9-A  | 1000   | Bozic | Inf | last   | wholeT_0.01 | J5:DiP, J5:DiP-A, J5:OT, J5:OT-A                                   |
| 153 | Yes         | 9       | 9-A  | 1000   | Bozic | Inf | last   | wholeT_0.5  | S5:DiP-A, S5:OT, S5:OT-A                                           |
| 154 | Yes         | 9       | 9-A  | 1000   | Bozic | Inf | unif   | singleC     | S1:OT, S1:OT-A                                                     |
| 155 | Yes         | 9       | 9-A  | 1000   | Bozic | Inf | unif   | wholeT_0.01 | S5:DiP, S5:DiP-A, S5:OT, S5:OT-A                                   |
| 156 | Yes         | 9       | 9-A  | 1000   | Bozic | Inf | unif   | wholeT_0.5  | S1:CBN, S1:OT, S1:OT-A                                             |
| 157 | Yes         | 9       | 9-A  | 1000   | exp   | 0   | last   | singleC     | J1:OT, S1:DiP, S1:DiP-A, S1:OT, S1:OT-A, S5:OT, S5:OT-A            |
| 158 | Yes         | 9       | 9-A  | 1000   | exp   | 0   | last   | wholeT_0.01 | S1:DiP-A, S1:OT, S1:OT-A                                           |
| 159 | Yes         | 9       | 9-A  | 1000   | exp   | 0   | last   | wholeT_0.5  | S1:DiP, S1:DiP-A, S1:OT, S1:OT-A, S5:DiP, S5:DiP-A, S5:OT          |
| 160 | Yes         | 9       | 9-A  | 1000   | exp   | 0   | unif   | singleC     | S1:DiP, S1:DiP-A, S1:OT, S1:OT-A, S5:DiP, S5:DiP-A, S5:OT, S5:OT-A |
| 161 | Yes         | 9       | 9-A  | 1000   | exp   | 0   | unif   | wholeT_0.01 | S1:DiP, S1:DiP-A, S1:OT, S1:OT-A                                   |
| 162 | Yes         | 9       | 9-A  | 1000   | exp   | 0   | unif   | wholeT_0.5  | S1:DiP, S1:DiP-A, S1:OT, S1:OT-A, S5:DiP, S5:DiP-A, S5:OT, S5:OT-A |
| 163 | Yes         | 9       | 9-A  | 1000   | exp   | Inf | last   | singleC     | S5:DiP, S5:DiP-A, S5:OT, S5:OT-A                                   |
| 164 | Yes         | 9       | 9-A  | 1000   | exp   | Inf | last   | wholeT_0.01 | J5:DiP, J5:DiP-A, J5:OT, J5:OT-A, S5:CBN-A                         |
| 165 | Yes         | 9       | 9-A  | 1000   | exp   | Inf | last   | wholeT_0.5  | S5:DiP, S5:DiP-A, S5:OT, S5:OT-A                                   |
| 166 | Yes         | 9       | 9-A  | 1000   | exp   | Inf | unif   | singleC     | S1:OT, S1:OT-A                                                     |
| 167 | Yes         | 9       | 9-A  | 1000   | exp   | Inf | unif   | wholeT_0.01 | J1:DiP, J1:DiP-A, J1:OT, J1:OT-A                                   |
| 168 | Yes         | 9       | 9-A  | 1000   | exp   | Inf | unif   | wholeT_0.5  | S1:OT, S1:OT-A                                                     |
| 169 | Yes         | 9       | 9-A  | 1000   | McF_4 | 0   | last   | singleC     | S1:DiP, S1:DiP-A, S1:OT, S1:OT-A, S5:DiP                           |
| 170 | Yes         | 9       | 9-A  | 1000   | McF_4 | 0   | last   | wholeT_0.01 | S5:DiP, S5:DiP-A                                                   |
| 171 | Yes         | 9       | 9-A  | 1000   | McF_4 | 0   | last   | wholeT_0.5  | S1:DiP, S1:DiP-A, S1:OT, S1:OT-A                                   |
| 172 | Yes         | 9       | 9-A  | 1000   | McF_4 | 0   | unif   | singleC     | S1:DiP-A, S1:OT, S1:OT-A                                           |
| 173 | Yes         | 9       | 9-A  | 1000   | McF_4 | 0   | unif   | wholeT_0.01 | S5:CBN-A, S5:DiP, S5:DiP-A, S5:OT, S5:OT-A                         |
| 174 | Yes         | 9       | 9-A  | 1000   | McF_4 | 0   | unif   | wholeT_0.5  | S1:DiP-A, S1:OT, S1:OT-A                                           |
| 175 | Yes         | 9       | 9-A  | 1000   | McF_4 | Inf | last   | singleC     | S1:OT, S1:OT-A                                                     |
| 176 | Yes         | 9       | 9-A  | 1000   | McF_4 | Inf | last   | wholeT_0.01 | S5:OT                                                              |
| 177 | Yes         | 9       | 9-A  | 1000   | McF_4 | Inf | last   | wholeT_0.5  | S1:DiP, S1:DiP-A, S1:OT, S1:OT-A                                   |
| 178 | Yes         | 9       | 9-A  | 1000   | McF_4 | Inf | unif   | singleC     | S1:OT, S1:OT-A                                                     |

Table 13: (continued)

|     | Conjunction | Drivers | Tree | S.Size | Model | sh  | S.Time | S.Type      | Best method(s)                                                       |
|-----|-------------|---------|------|--------|-------|-----|--------|-------------|----------------------------------------------------------------------|
| 179 | Yes         | 9       | 9-A  | 1000   | McF_4 | Inf | unif   | wholeT_0.01 | S5:CBN-A, S5:DiP, S5:DiP-A, S5:OT, S5:OT-A                           |
| 180 | Yes         | 9       | 9-A  | 1000   | McF_4 | Inf | unif   | wholeT_0.5  | S1:OT, S1:OT-A                                                       |
| 181 | Yes         | 9       | 9-A  | 1000   | McF_6 | 0   | last   | singleC     | S1:OT, S5:OT                                                         |
| 182 | Yes         | 9       | 9-A  | 1000   | McF_6 | 0   | last   | wholeT_0.01 | S5:DiP, S5:OT                                                        |
| 183 | Yes         | 9       | 9-A  | 1000   | McF_6 | 0   | last   | wholeT_0.5  | S1:OT, S5:OT                                                         |
| 184 | Yes         | 9       | 9-A  | 1000   | McF_6 | 0   | unif   | singleC     | S1:DiP, S1:DiP-A                                                     |
| 185 | Yes         | 9       | 9-A  | 1000   | McF_6 | 0   | unif   | wholeT_0.01 | S5:CBN, S5:CBN-A, S5:DiP, S5:DiP-A                                   |
| 186 | Yes         | 9       | 9-A  | 1000   | McF_6 | 0   | unif   | wholeT_0.5  | S1:CBN-A, S1:DiP, S1:DiP-A                                           |
| 187 | Yes         | 9       | 9-A  | 1000   | McF_6 | Inf | last   | singleC     | S5:DiP                                                               |
| 188 | Yes         | 9       | 9-A  | 1000   | McF_6 | Inf | last   | wholeT_0.01 | S5:OT                                                                |
| 189 | Yes         | 9       | 9-A  | 1000   | McF_6 | Inf | last   | wholeT_0.5  | S5:DiP                                                               |
| 190 | Yes         | 9       | 9-A  | 1000   | McF_6 | Inf | unif   | singleC     | S1:CBN, S1:CBN-A, S1:DiP, S1:DiP-A, S1:OT, S1:OT-A, S5:CBN-A         |
| 191 | Yes         | 9       | 9-A  | 1000   | McF_6 | Inf | unif   | wholeT_0.01 | J1:CBN, J1:CBN-A, S5:CBN, S5:CBN-A                                   |
| 192 | Yes         | 9       | 9-A  | 1000   | McF_6 | Inf | unif   | wholeT_0.5  | S1:CBN, S1:CBN-A, S1:DiP, S1:DiP-A, S1:OT, S1:OT-A, S5:CBN, S5:CBN-A |
| 193 | Yes         | 9       | 9-A  | 200    | Bozic | 0   | last   | singleC     | S1:OT, S1:OT-A                                                       |
| 194 | Yes         | 9       | 9-A  | 200    | Bozic | 0   | last   | wholeT_0.01 | S5:OT, S5:OT-A                                                       |
| 195 | Yes         | 9       | 9-A  | 200    | Bozic | 0   | last   | wholeT_0.5  | S1:OT, S1:OT-A                                                       |
| 196 | Yes         | 9       | 9-A  | 200    | Bozic | 0   | unif   | singleC     | S1:OT, S1:OT-A, S5:DiP, S5:DiP-A, S5:OT, S5:OT-A                     |
| 197 | Yes         | 9       | 9-A  | 200    | Bozic | 0   | unif   | wholeT_0.01 | J1:DiP, J1:DiP-A, J1:OT, J1:OT-A, S5:DiP-A, S5:OT, S5:OT-A           |
| 198 | Yes         | 9       | 9-A  | 200    | Bozic | 0   | unif   | wholeT_0.5  | S1:DiP-A, S1:OT, S1:OT-A, S5:DiP, S5:DiP-A, S5:OT, S5:OT-A           |
| 199 | Yes         | 9       | 9-A  | 200    | Bozic | Inf | last   | singleC     | S5:OT, S5:OT-A                                                       |
| 200 | Yes         | 9       | 9-A  | 200    | Bozic | Inf | last   | wholeT_0.01 | J5:OT, J5:OT-A                                                       |
| 201 | Yes         | 9       | 9-A  | 200    | Bozic | Inf | last   | wholeT_0.5  | S5:OT, S5:OT-A                                                       |
| 202 | Yes         | 9       | 9-A  | 200    | Bozic | Inf | unif   | singleC     | J1:DiP, J1:DiP-A, J1:OT, J1:OT-A, S5:DiP, S5:DiP-A, S5:OT, S5:OT-A   |
| 203 | Yes         | 9       | 9-A  | 200    | Bozic | Inf | unif   | wholeT_0.01 | S5:OT, S5:OT-A                                                       |
| 204 | Yes         | 9       | 9-A  | 200    | Bozic | Inf | unif   | wholeT_0.5  | J1:DiP, J1:DiP-A, J1:OT, J1:OT-A, S5:DiP, S5:DiP-A, S5:OT, S5:OT-A   |
| 205 | Yes         | 9       | 9-A  | 200    | exp   | 0   | last   | singleC     | S1:OT, S1:OT-A                                                       |
| 206 | Yes         | 9       | 9-A  | 200    | exp   | 0   | last   | wholeT_0.01 | S1:OT, S1:OT-A                                                       |
| 207 | Yes         | 9       | 9-A  | 200    | exp   | 0   | last   | wholeT_0.5  | S1:OT, S1:OT-A                                                       |
| 208 | Yes         | 9       | 9-A  | 200    | exp   | 0   | unif   | singleC     | S1:DiP, S1:DiP-A, S1:OT, S1:OT-A, S5:DiP, S5:DiP-A, S5:OT, S5:OT-A   |

Table 13: (continued)

|     | Conjunction | Drivers | Tree | S.Size | Model | sh  | S.Time | S.Type      | Best method(s)                                                                     |
|-----|-------------|---------|------|--------|-------|-----|--------|-------------|------------------------------------------------------------------------------------|
| 209 | Yes         | 9       | 9-A  | 200    | exp   | 0   | unif   | wholeT_0.01 | S1:OT, S1:OT-A, S5:DiP, S5:DiP-A, S5:OT                                            |
| 210 | Yes         | 9       | 9-A  | 200    | exp   | 0   | unif   | wholeT_0.5  | S1:DiP, S1:DiP-A, S1:OT, S1:OT-A, S5:DiP, S5:DiP-A, S5:OT, S5:OT-A                 |
| 211 | Yes         | 9       | 9-A  | 200    | exp   | Inf | last   | singleC     | S5:OT, S5:OT-A                                                                     |
| 212 | Yes         | 9       | 9-A  | 200    | exp   | Inf | last   | wholeT_0.01 | J5:OT, J5:OT-A                                                                     |
| 213 | Yes         | 9       | 9-A  | 200    | exp   | Inf | last   | wholeT_0.5  | S5:OT, S5:OT-A                                                                     |
| 214 | Yes         | 9       | 9-A  | 200    | exp   | Inf | unif   | singleC     | J1:DiP, J1:DiP-A, J1:OT, J1:OT-A, S1:OT, S1:OT-A, S5:DiP, S5:DiP-A, S5:OT, S5:OT-A |
| 215 | Yes         | 9       | 9-A  | 200    | exp   | Inf | unif   | wholeT_0.01 | J1:OT-A, J5:OT, S5:OT, S5:OT-A                                                     |
| 216 | Yes         | 9       | 9-A  | 200    | exp   | Inf | unif   | wholeT_0.5  | S1:OT, S1:OT-A                                                                     |
| 217 | Yes         | 9       | 9-A  | 200    | McF_4 | 0   | last   | singleC     | S5:OT, S5:OT-A                                                                     |
| 218 | Yes         | 9       | 9-A  | 200    | McF_4 | 0   | last   | wholeT_0.01 | S5:OT, S5:OT-A                                                                     |
| 219 | Yes         | 9       | 9-A  | 200    | McF_4 | 0   | last   | wholeT_0.5  | S5:OT, S5:OT-A                                                                     |
| 220 | Yes         | 9       | 9-A  | 200    | McF_4 | 0   | unif   | singleC     | S1:OT, S1:OT-A, S5:CBN-A, S5:OT, S5:OT-A                                           |
| 221 | Yes         | 9       | 9-A  | 200    | McF_4 | 0   | unif   | wholeT_0.01 | S5:OT, S5:OT-A                                                                     |
| 222 | Yes         | 9       | 9-A  | 200    | McF_4 | 0   | unif   | wholeT_0.5  | S1:OT, S1:OT-A, S5:OT, S5:OT-A                                                     |
| 223 | Yes         | 9       | 9-A  | 200    | McF_4 | Inf | last   | singleC     | S5:OT, S5:OT-A                                                                     |
| 224 | Yes         | 9       | 9-A  | 200    | McF_4 | Inf | last   | wholeT_0.01 | S5:OT                                                                              |
| 225 | Yes         | 9       | 9-A  | 200    | McF_4 | Inf | last   | wholeT_0.5  | S5:OT, S5:OT-A                                                                     |
| 226 | Yes         | 9       | 9-A  | 200    | McF_4 | Inf | unif   | singleC     | S5:OT, S5:OT-A                                                                     |
| 227 | Yes         | 9       | 9-A  | 200    | McF_4 | Inf | unif   | wholeT_0.01 | S5:CBN-A, S5:OT, S5:OT-A                                                           |
| 228 | Yes         | 9       | 9-A  | 200    | McF_4 | Inf | unif   | wholeT_0.5  | S1:OT, S1:OT-A, S5:CBN-A, S5:OT, S5:OT-A                                           |
| 229 | Yes         | 9       | 9-A  | 200    | McF_6 | 0   | last   | singleC     | S5:OT                                                                              |
| 230 | Yes         | 9       | 9-A  | 200    | McF_6 | 0   | last   | wholeT_0.01 | S5:OT                                                                              |
| 231 | Yes         | 9       | 9-A  | 200    | McF_6 | 0   | last   | wholeT_0.5  | S5:OT                                                                              |
| 232 | Yes         | 9       | 9-A  | 200    | McF_6 | 0   | unif   | singleC     | S5:CBN, S5:CBN-A                                                                   |
| 233 | Yes         | 9       | 9-A  | 200    | McF_6 | 0   | unif   | wholeT_0.01 | J1:CBN, J1:CBN-A, S5:CBN, S5:CBN-A, S5:OT, S5:OT-A                                 |
| 234 | Yes         | 9       | 9-A  | 200    | McF_6 | 0   | unif   | wholeT_0.5  | J1:CBN, J1:CBN-A, S5:CBN, S5:CBN-A, S5:OT, S5:OT-A                                 |
| 235 | Yes         | 9       | 9-A  | 200    | McF_6 | Inf | last   | singleC     | S5:OT                                                                              |
| 236 | Yes         | 9       | 9-A  | 200    | McF_6 | Inf | last   | wholeT_0.01 | S5:OT                                                                              |
| 237 | Yes         | 9       | 9-A  | 200    | McF_6 | Inf | last   | wholeT_0.5  | S5:OT                                                                              |
| 238 | Yes         | 9       | 9-A  | 200    | McF_6 | Inf | unif   | singleC     | J1:CBN, J1:CBN-A, S5:CBN, S5:CBN-A                                                 |
| 239 | Yes         | 9       | 9-A  | 200    | McF_6 | Inf | unif   | wholeT_0.01 | J1:CBN, J1:CBN-A, S5:CBN, S5:CBN-A                                                 |
| 240 | Yes         | 9       | 9-A  | 200    | McF_6 | Inf | unif   | wholeT_0.5  | S5:CBN, S5:CBN-A                                                                   |

Table 13: (continued)

|     | Conjunction | Drivers | Tree | S.Size | Model | sh  | S.Time | S.Type      | Best method(s)                                                        |
|-----|-------------|---------|------|--------|-------|-----|--------|-------------|-----------------------------------------------------------------------|
| 241 | Yes         | 9       | 9-A  | 100    | Bozic | 0   | last   | singleC     | S5:OT, S5:OT-A                                                        |
| 242 | Yes         | 9       | 9-A  | 100    | Bozic | 0   | last   | wholeT_0.01 | S5:OT, S5:OT-A                                                        |
| 243 | Yes         | 9       | 9-A  | 100    | Bozic | 0   | last   | wholeT_0.5  | J1:DiP, J1:DiP-A, J1:OT, J1:OT-A,<br>S5:DiP, S5:DiP-A, S5:OT, S5:OT-A |
| 244 | Yes         | 9       | 9-A  | 100    | Bozic | 0   | unif   | singleC     | S5:DiP, S5:DiP-A, S5:OT, S5:OT-A                                      |
| 245 | Yes         | 9       | 9-A  | 100    | Bozic | 0   | unif   | wholeT_0.01 | J1:OT, J1:OT-A, S5:DiP, S5:DiP-A,<br>S5:OT, S5:OT-A                   |
| 246 | Yes         | 9       | 9-A  | 100    | Bozic | 0   | unif   | wholeT_0.5  | S5:DiP, S5:DiP-A, S5:OT, S5:OT-A                                      |
| 247 | Yes         | 9       | 9-A  | 100    | Bozic | Inf | last   | singleC     | J5:OT, J5:OT-A, S5:OT, S5:OT-A                                        |
| 248 | Yes         | 9       | 9-A  | 100    | Bozic | Inf | last   | wholeT_0.01 | J5:OT, J5:OT-A                                                        |
| 249 | Yes         | 9       | 9-A  | 100    | Bozic | Inf | last   | wholeT_0.5  | J5:OT, J5:OT-A, S5:OT, S5:OT-A                                        |
| 250 | Yes         | 9       | 9-A  | 100    | Bozic | Inf | unif   | singleC     | S5:DiP-A, S5:OT, S5:OT-A                                              |
| 251 | Yes         | 9       | 9-A  | 100    | Bozic | Inf | unif   | wholeT_0.01 | J5:OT, J5:OT-A, S5:OT, S5:OT-A                                        |
| 252 | Yes         | 9       | 9-A  | 100    | Bozic | Inf | unif   | wholeT_0.5  | J1:OT-A, S5:DiP, S5:DiP-A, S5:OT,<br>S5:OT-A                          |
| 253 | Yes         | 9       | 9-A  | 100    | exp   | 0   | last   | singleC     | S1:OT, S1:OT-A, S5:DiP, S5:DiP-A,<br>S5:OT, S5:OT-A                   |
| 254 | Yes         | 9       | 9-A  | 100    | exp   | 0   | last   | wholeT_0.01 | J1:OT, S1:OT, S1:OT-A, S5:OT, S5:OT-<br>A                             |
| 255 | Yes         | 9       | 9-A  | 100    | exp   | 0   | last   | wholeT_0.5  | S1:OT, S1:OT-A, S5:DiP, S5:DiP-A,<br>S5:OT, S5:OT-A                   |
| 256 | Yes         | 9       | 9-A  | 100    | exp   | 0   | unif   | singleC     | S1:OT, S1:OT-A, S5:DiP, S5:DiP-A,<br>S5:OT, S5:OT-A                   |
| 257 | Yes         | 9       | 9-A  | 100    | exp   | 0   | unif   | wholeT_0.01 | S5:DiP, S5:DiP-A, S5:OT, S5:OT-A                                      |
| 258 | Yes         | 9       | 9-A  | 100    | exp   | 0   | unif   | wholeT_0.5  | S1:DiP, S1:OT, S1:OT-A, S5:DiP,<br>S5:DiP-A, S5:OT, S5:OT-A           |
| 259 | Yes         | 9       | 9-A  | 100    | exp   | Inf | last   | singleC     | S5:OT, S5:OT-A                                                        |
| 260 | Yes         | 9       | 9-A  | 100    | exp   | Inf | last   | wholeT_0.01 | J5:CBN-A, J5:OT, J5:OT-A                                              |
| 261 | Yes         | 9       | 9-A  | 100    | exp   | Inf | last   | wholeT_0.5  | S5:OT, S5:OT-A                                                        |
| 262 | Yes         | 9       | 9-A  | 100    | exp   | Inf | unif   | singleC     | S5:DiP, S5:DiP-A, S5:OT, S5:OT-A                                      |
| 263 | Yes         | 9       | 9-A  | 100    | exp   | Inf | unif   | wholeT_0.01 | J5:OT, S5:OT, S5:OT-A                                                 |
| 264 | Yes         | 9       | 9-A  | 100    | exp   | Inf | unif   | wholeT_0.5  | J1:DiP, J1:DiP-A, S5:DiP, S5:DiP-A,<br>S5:OT, S5:OT-A                 |
| 265 | Yes         | 9       | 9-A  | 100    | McF_4 | 0   | last   | singleC     | S5:OT, S5:OT-A                                                        |
| 266 | Yes         | 9       | 9-A  | 100    | McF_4 | 0   | last   | wholeT_0.01 | S5:OT, S5:OT-A                                                        |
| 267 | Yes         | 9       | 9-A  | 100    | McF_4 | 0   | last   | wholeT_0.5  | S5:OT, S5:OT-A                                                        |
| 268 | Yes         | 9       | 9-A  | 100    | McF_4 | 0   | unif   | singleC     | S5:CBN-A, S5:OT, S5:OT-A                                              |
| 269 | Yes         | 9       | 9-A  | 100    | McF_4 | 0   | unif   | wholeT_0.01 | S5:OT, S5:OT-A                                                        |
| 270 | Yes         | 9       | 9-A  | 100    | McF_4 | 0   | unif   | wholeT_0.5  | S5:OT, S5:OT-A                                                        |
| 271 | Yes         | 9       | 9-A  | 100    | McF_4 | Inf | last   | singleC     | S5:OT, S5:OT-A                                                        |

Table 13: (continued)

|     | Conjunction | Drivers | Tree | S.Size | Model | sh  | S.Time | S.Type      | Best method(s)                                                                                                  |
|-----|-------------|---------|------|--------|-------|-----|--------|-------------|-----------------------------------------------------------------------------------------------------------------|
| 272 | Yes         | 9       | 9-A  | 100    | McF_4 | Inf | last   | wholeT_0.01 | S5:OT                                                                                                           |
| 273 | Yes         | 9       | 9-A  | 100    | McF_4 | Inf | last   | wholeT_0.5  | S5:OT, S5:OT-A                                                                                                  |
| 274 | Yes         | 9       | 9-A  | 100    | McF_4 | Inf | unif   | singleC     | S5:CBN-A, S5:OT, S5:OT-A                                                                                        |
| 275 | Yes         | 9       | 9-A  | 100    | McF_4 | Inf | unif   | wholeT_0.01 | S5:CBN-A, S5:OT, S5:OT-A                                                                                        |
| 276 | Yes         | 9       | 9-A  | 100    | McF_4 | Inf | unif   | wholeT_0.5  | S5:OT, S5:OT-A                                                                                                  |
| 277 | Yes         | 9       | 9-A  | 100    | McF_6 | 0   | last   | singleC     | S5:OT                                                                                                           |
| 278 | Yes         | 9       | 9-A  | 100    | McF_6 | 0   | last   | wholeT_0.01 | S5:OT                                                                                                           |
| 279 | Yes         | 9       | 9-A  | 100    | McF_6 | 0   | last   | wholeT_0.5  | S5:OT                                                                                                           |
| 280 | Yes         | 9       | 9-A  | 100    | McF_6 | 0   | unif   | singleC     | J1:CBN, J1:CBN-A, S5:CBN, S5:CBN-A, S5:OT, S5:OT-A                                                              |
| 281 | Yes         | 9       | 9-A  | 100    | McF_6 | 0   | unif   | wholeT_0.01 | S5:CBN, S5:CBN-A, S5:OT, S5:OT-A                                                                                |
| 282 | Yes         | 9       | 9-A  | 100    | McF_6 | 0   | unif   | wholeT_0.5  | J1:CBN, J1:CBN-A, S5:CBN, S5:CBN-A, S5:OT, S5:OT-A                                                              |
| 283 | Yes         | 9       | 9-A  | 100    | McF_6 | Inf | last   | singleC     | S5:OT                                                                                                           |
| 284 | Yes         | 9       | 9-A  | 100    | McF_6 | Inf | last   | wholeT_0.01 | S5:OT, S5:OT-A                                                                                                  |
| 285 | Yes         | 9       | 9-A  | 100    | McF_6 | Inf | last   | wholeT_0.5  | S5:OT                                                                                                           |
| 286 | Yes         | 9       | 9-A  | 100    | McF_6 | Inf | unif   | singleC     | J1:CBN-A, S5:CBN, S5:CBN-A, S5:OT, S5:OT-A                                                                      |
| 287 | Yes         | 9       | 9-A  | 100    | McF_6 | Inf | unif   | wholeT_0.01 | S5:CBN, S5:CBN-A, S5:OT, S5:OT-A                                                                                |
| 288 | Yes         | 9       | 9-A  | 100    | McF_6 | Inf | unif   | wholeT_0.5  | J1:CBN-A, S5:CBN, S5:CBN-A, S5:OT, S5:OT-A                                                                      |
| 289 | Yes         | 7       | 7-A  | 1000   | Bozic | 0   | last   | singleC     | S1:OT-A, S5:OT-A                                                                                                |
| 290 | Yes         | 7       | 7-A  | 1000   | Bozic | 0   | last   | wholeT_0.01 | J1:DiP-A, J1:OT-A, J5:DiP-A, J5:OT-A, S1:DiP-A, S1:OT-A, S5:DiP-A, S5:OT-A                                      |
| 291 | Yes         | 7       | 7-A  | 1000   | Bozic | 0   | last   | wholeT_0.5  | S1:OT-A                                                                                                         |
| 292 | Yes         | 7       | 7-A  | 1000   | Bozic | 0   | unif   | singleC     | S1:OT, S1:OT-A                                                                                                  |
| 293 | Yes         | 7       | 7-A  | 1000   | Bozic | 0   | unif   | wholeT_0.01 | J5:CBN, J5:CBN-A, J5:DiP-A, J5:OT, J5:OT-A                                                                      |
| 294 | Yes         | 7       | 7-A  | 1000   | Bozic | 0   | unif   | wholeT_0.5  | J1:DiP, J1:DiP-A, J1:OT, J5:DiP, J5:DiP-A, S1:CBN, S1:CBN-A, S1:DiP, S1:DiP-A, S1:OT, S1:OT-A, S5:DiP, S5:DiP-A |
| 295 | Yes         | 7       | 7-A  | 1000   | Bozic | Inf | last   | singleC     | J1:DiP-A, J1:OT-A, J5:DiP-A, J5:OT-A, S5:DiP-A, S5:OT-A                                                         |
| 296 | Yes         | 7       | 7-A  | 1000   | Bozic | Inf | last   | wholeT_0.01 | J5:DiP-A, J5:OT-A                                                                                               |
| 297 | Yes         | 7       | 7-A  | 1000   | Bozic | Inf | last   | wholeT_0.5  | J1:DiP-A, J1:OT-A, J5:DiP-A, J5:OT-A, S5:OT-A                                                                   |
| 298 | Yes         | 7       | 7-A  | 1000   | Bozic | Inf | unif   | singleC     | S1:CBN, S1:CBN-A                                                                                                |

Table 13: (continued)

|     | Conjunction | Drivers | Tree | S.Size | Model | sh  | S.Time | S.Type      | Best method(s)                                                                                       |
|-----|-------------|---------|------|--------|-------|-----|--------|-------------|------------------------------------------------------------------------------------------------------|
| 299 | Yes         | 7       | 7-A  | 1000   | Bozic | Inf | unif   | wholeT_0.01 | J5:CBN, J5:CBN-A, J5:DiP-A, J5:OT, S5:CBN, S5:CBN-A, S5:DiP-A, S5:OT, S5:OT-A                        |
| 300 | Yes         | 7       | 7-A  | 1000   | Bozic | Inf | unif   | wholeT_0.5  | S1:CBN, S1:CBN-A                                                                                     |
| 301 | Yes         | 7       | 7-A  | 1000   | exp   | 0   | last   | singleC     | S1:OT-A                                                                                              |
| 302 | Yes         | 7       | 7-A  | 1000   | exp   | 0   | last   | wholeT_0.01 | J1:OT-A, S1:OT-A, S5:OT-A                                                                            |
| 303 | Yes         | 7       | 7-A  | 1000   | exp   | 0   | last   | wholeT_0.5  | S1:OT-A                                                                                              |
| 304 | Yes         | 7       | 7-A  | 1000   | exp   | 0   | unif   | singleC     | J1:DiP, J1:DiP-A, J5:DiP, J5:DiP-A, S1:DiP, S1:DiP-A, S5:DiP-A                                       |
| 305 | Yes         | 7       | 7-A  | 1000   | exp   | 0   | unif   | wholeT_0.01 | J1:CBN, J1:CBN-A, J1:OT, J1:OT-A, S1:CBN-A                                                           |
| 306 | Yes         | 7       | 7-A  | 1000   | exp   | 0   | unif   | wholeT_0.5  | J1:DiP, J1:DiP-A, J5:DiP, J5:DiP-A, S1:DiP, S1:DiP-A, S5:DiP, S5:DiP-A                               |
| 307 | Yes         | 7       | 7-A  | 1000   | exp   | Inf | last   | singleC     | J1:OT-A, S1:OT-A, S5:OT-A                                                                            |
| 308 | Yes         | 7       | 7-A  | 1000   | exp   | Inf | last   | wholeT_0.01 | J5:DiP-A, J5:OT-A, S5:DiP-A, S5:OT-A                                                                 |
| 309 | Yes         | 7       | 7-A  | 1000   | exp   | Inf | last   | wholeT_0.5  | S1:OT-A, S5:OT-A                                                                                     |
| 310 | Yes         | 7       | 7-A  | 1000   | exp   | Inf | unif   | singleC     | S1:CBN, S1:CBN-A                                                                                     |
| 311 | Yes         | 7       | 7-A  | 1000   | exp   | Inf | unif   | wholeT_0.01 | J1:CBN, J1:CBN-A, J1:OT, J1:OT-A, J5:CBN, J5:CBN-A, J5:OT, J5:OT-A, S5:CBN, S5:CBN-A, S5:OT, S5:OT-A |
| 312 | Yes         | 7       | 7-A  | 1000   | exp   | Inf | unif   | wholeT_0.5  | S1:CBN, S1:CBN-A                                                                                     |
| 313 | Yes         | 7       | 7-A  | 1000   | McF_4 | 0   | last   | singleC     | J1:DiP-A, J1:OT-A, J5:DiP-A, J5:OT-A, S1:DiP-A, S1:OT-A, S5:DiP-A, S5:OT-A                           |
| 314 | Yes         | 7       | 7-A  | 1000   | McF_4 | 0   | last   | wholeT_0.01 | S5:DiP-A, S5:OT-A                                                                                    |
| 315 | Yes         | 7       | 7-A  | 1000   | McF_4 | 0   | last   | wholeT_0.5  | J1:DiP-A, J1:OT-A, J5:DiP-A, J5:OT-A, S1:DiP-A, S5:DiP-A, S5:OT-A                                    |
| 316 | Yes         | 7       | 7-A  | 1000   | McF_4 | 0   | unif   | singleC     | J1:DiP-A, J1:OT, J1:OT-A, S1:DiP-A, S1:OT, S1:OT-A, S5:DiP-A, S5:OT, S5:OT-A                         |
| 317 | Yes         | 7       | 7-A  | 1000   | McF_4 | 0   | unif   | wholeT_0.01 | J1:DiP-A, J1:OT, J1:OT-A, S5:DiP-A, S5:OT, S5:OT-A                                                   |
| 318 | Yes         | 7       | 7-A  | 1000   | McF_4 | 0   | unif   | wholeT_0.5  | J1:DiP-A, J1:OT, J1:OT-A, S1:DiP-A, S1:OT, S1:OT-A, S5:DiP-A, S5:OT, S5:OT-A                         |
| 319 | Yes         | 7       | 7-A  | 1000   | McF_4 | Inf | last   | singleC     | J1:DiP-A, J1:OT-A, J5:DiP-A, J5:OT-A, S1:OT-A, S5:DiP-A, S5:OT-A                                     |
| 320 | Yes         | 7       | 7-A  | 1000   | McF_4 | Inf | last   | wholeT_0.01 | J1:OT-A, J5:DiP-A, J5:OT-A, S5:DiP-A, S5:OT-A                                                        |
| 321 | Yes         | 7       | 7-A  | 1000   | McF_4 | Inf | last   | wholeT_0.5  | J1:DiP-A, J1:OT-A, J5:DiP-A, J5:OT-A, S1:DiP-A, S1:OT-A, S5:DiP-A, S5:OT-A                           |



Table 13: (continued)

|     | Conjunction | Drivers | Tree | S.Size | Model | sh  | S.Time | S.Type      | Best method(s)                                                               |
|-----|-------------|---------|------|--------|-------|-----|--------|-------------|------------------------------------------------------------------------------|
| 322 | Yes         | 7       | 7-A  | 1000   | McF_4 | Inf | unif   | singleC     | J1:DiP-A, J1:OT, J1:OT-A, S1:DiP-A, S1:OT, S1:OT-A, S5:DiP-A, S5:OT, S5:OT-A |
| 323 | Yes         | 7       | 7-A  | 1000   | McF_4 | Inf | unif   | wholeT_0.01 | J1:DiP-A, J1:OT, J1:OT-A, J5:OT, S5:OT, S5:OT-A                              |
| 324 | Yes         | 7       | 7-A  | 1000   | McF_4 | Inf | unif   | wholeT_0.5  | J1:DiP-A, J1:OT, J1:OT-A, S1:DiP-A, S1:OT, S1:OT-A, S5:DiP-A, S5:OT, S5:OT-A |
| 325 | Yes         | 7       | 7-A  | 1000   | McF_6 | 0   | last   | singleC     | S5:OT-A                                                                      |
| 326 | Yes         | 7       | 7-A  | 1000   | McF_6 | 0   | last   | wholeT_0.01 | J1:OT-A, S5:DiP-A, S5:OT-A                                                   |
| 327 | Yes         | 7       | 7-A  | 1000   | McF_6 | 0   | last   | wholeT_0.5  | S5:OT-A                                                                      |
| 328 | Yes         | 7       | 7-A  | 1000   | McF_6 | 0   | unif   | singleC     | S1:CBN-A                                                                     |
| 329 | Yes         | 7       | 7-A  | 1000   | McF_6 | 0   | unif   | wholeT_0.01 | J1:DiP, J1:DiP-A, S5:DiP, S5:DiP-A                                           |
| 330 | Yes         | 7       | 7-A  | 1000   | McF_6 | 0   | unif   | wholeT_0.5  | S1:CBN-A                                                                     |
| 331 | Yes         | 7       | 7-A  | 1000   | McF_6 | Inf | last   | singleC     | S5:DiP-A, S5:OT-A                                                            |
| 332 | Yes         | 7       | 7-A  | 1000   | McF_6 | Inf | last   | wholeT_0.01 | S5:DiP-A, S5:OT-A                                                            |
| 333 | Yes         | 7       | 7-A  | 1000   | McF_6 | Inf | last   | wholeT_0.5  | J1:DiP-A, J5:DiP-A, S5:DiP-A, S5:OT-A                                        |
| 334 | Yes         | 7       | 7-A  | 1000   | McF_6 | Inf | unif   | singleC     | S1:CBN-A                                                                     |
| 335 | Yes         | 7       | 7-A  | 1000   | McF_6 | Inf | unif   | wholeT_0.01 | J1:CBN-A, S5:CBN-A                                                           |
| 336 | Yes         | 7       | 7-A  | 1000   | McF_6 | Inf | unif   | wholeT_0.5  | S1:CBN-A                                                                     |
| 337 | Yes         | 7       | 7-A  | 200    | Bozic | 0   | last   | singleC     | S1:OT-A, S5:OT-A                                                             |
| 338 | Yes         | 7       | 7-A  | 200    | Bozic | 0   | last   | wholeT_0.01 | J1:OT-A, J5:OT-A, S5:OT-A                                                    |
| 339 | Yes         | 7       | 7-A  | 200    | Bozic | 0   | last   | wholeT_0.5  | S1:OT-A, S5:OT-A                                                             |
| 340 | Yes         | 7       | 7-A  | 200    | Bozic | 0   | unif   | singleC     | J1:CBN-A, J1:OT, J1:OT-A, S1:CBN, S1:OT, S1:OT-A                             |
| 341 | Yes         | 7       | 7-A  | 200    | Bozic | 0   | unif   | wholeT_0.01 | J5:CBN, J5:OT, J5:OT-A                                                       |
| 342 | Yes         | 7       | 7-A  | 200    | Bozic | 0   | unif   | wholeT_0.5  | J1:CBN, J1:OT, J1:OT-A, S1:CBN-A, S1:OT, S1:OT-A                             |
| 343 | Yes         | 7       | 7-A  | 200    | Bozic | Inf | last   | singleC     | J5:OT-A, S5:OT-A                                                             |
| 344 | Yes         | 7       | 7-A  | 200    | Bozic | Inf | last   | wholeT_0.01 | J5:OT-A                                                                      |
| 345 | Yes         | 7       | 7-A  | 200    | Bozic | Inf | last   | wholeT_0.5  | J5:OT-A, S5:OT-A                                                             |
| 346 | Yes         | 7       | 7-A  | 200    | Bozic | Inf | unif   | singleC     | J1:CBN, J1:CBN-A, S5:CBN, S5:CBN-A                                           |
| 347 | Yes         | 7       | 7-A  | 200    | Bozic | Inf | unif   | wholeT_0.01 | J5:CBN, J5:CBN-A, J5:OT, J5:OT-A, S5:CBN, S5:CBN-A, S5:OT, S5:OT-A           |
| 348 | Yes         | 7       | 7-A  | 200    | Bozic | Inf | unif   | wholeT_0.5  | J1:CBN, J1:CBN-A, S1:CBN                                                     |
| 349 | Yes         | 7       | 7-A  | 200    | exp   | 0   | last   | singleC     | S1:OT-A                                                                      |
| 350 | Yes         | 7       | 7-A  | 200    | exp   | 0   | last   | wholeT_0.01 | J1:CBN-A, J1:OT-A, S1:OT-A, S5:OT-A                                          |
| 351 | Yes         | 7       | 7-A  | 200    | exp   | 0   | last   | wholeT_0.5  | S1:OT-A                                                                      |

Table 13: (continued)

|     | Conjunction | Drivers | Tree | S.Size | Model | sh  | S.Time | S.Type      | Best method(s)                                                                                                                             |
|-----|-------------|---------|------|--------|-------|-----|--------|-------------|--------------------------------------------------------------------------------------------------------------------------------------------|
| 352 | Yes         | 7       | 7-A  | 200    | exp   | 0   | unif   | singleC     | J1:CBN, J1:CBN-A, J1:DiP, J1:DiP-A, J1:OT, J1:OT-A, J5:DiP, J5:DiP-A, S1:CBN, S1:CBN-A, S1:DiP, S1:DiP-A, S1:OT, S1:OT-A, S5:DiP, S5:DiP-A |
| 353 | Yes         | 7       | 7-A  | 200    | exp   | 0   | unif   | wholeT_0.01 | J1:CBN, J1:CBN-A, J1:OT, J1:OT-A, S1:CBN, S1:CBN-A, S1:OT, S1:OT-A                                                                         |
| 354 | Yes         | 7       | 7-A  | 200    | exp   | 0   | unif   | wholeT_0.5  | J1:DiP, J1:DiP-A, J5:DiP, J5:DiP-A, S1:DiP, S1:DiP-A, S5:DiP, S5:DiP-A                                                                     |
| 355 | Yes         | 7       | 7-A  | 200    | exp   | Inf | last   | singleC     | S5:OT-A                                                                                                                                    |
| 356 | Yes         | 7       | 7-A  | 200    | exp   | Inf | last   | wholeT_0.01 | J5:OT-A                                                                                                                                    |
| 357 | Yes         | 7       | 7-A  | 200    | exp   | Inf | last   | wholeT_0.5  | S5:OT-A                                                                                                                                    |
| 358 | Yes         | 7       | 7-A  | 200    | exp   | Inf | unif   | singleC     | J1:CBN, J1:CBN-A, J1:OT, J1:OT-A, S1:CBN, S1:CBN-A, S1:OT, S1:OT-A                                                                         |
| 359 | Yes         | 7       | 7-A  | 200    | exp   | Inf | unif   | wholeT_0.01 | J5:CBN, J5:CBN-A, J5:OT, J5:OT-A, S5:CBN, S5:CBN-A, S5:OT, S5:OT-A                                                                         |
| 360 | Yes         | 7       | 7-A  | 200    | exp   | Inf | unif   | wholeT_0.5  | J1:CBN, J1:CBN-A, J1:OT, J1:OT-A, S1:CBN, S1:CBN-A, S1:OT, S1:OT-A                                                                         |
| 361 | Yes         | 7       | 7-A  | 200    | McF_4 | 0   | last   | singleC     | J1:OT-A, J5:OT-A, S5:OT-A                                                                                                                  |
| 362 | Yes         | 7       | 7-A  | 200    | McF_4 | 0   | last   | wholeT_0.01 | S5:OT-A                                                                                                                                    |
| 363 | Yes         | 7       | 7-A  | 200    | McF_4 | 0   | last   | wholeT_0.5  | J1:OT-A, J5:OT-A, S5:OT-A                                                                                                                  |
| 364 | Yes         | 7       | 7-A  | 200    | McF_4 | 0   | unif   | singleC     | J1:OT, J1:OT-A, S5:OT, S5:OT-A                                                                                                             |
| 365 | Yes         | 7       | 7-A  | 200    | McF_4 | 0   | unif   | wholeT_0.01 | J1:OT, J1:OT-A, S5:OT, S5:OT-A                                                                                                             |
| 366 | Yes         | 7       | 7-A  | 200    | McF_4 | 0   | unif   | wholeT_0.5  | J1:OT, J1:OT-A, S5:OT, S5:OT-A                                                                                                             |
| 367 | Yes         | 7       | 7-A  | 200    | McF_4 | Inf | last   | singleC     | J1:OT-A, J5:OT-A, S5:OT-A                                                                                                                  |
| 368 | Yes         | 7       | 7-A  | 200    | McF_4 | Inf | last   | wholeT_0.01 | J5:OT-A, S5:OT-A                                                                                                                           |
| 369 | Yes         | 7       | 7-A  | 200    | McF_4 | Inf | last   | wholeT_0.5  | J1:OT-A, J5:OT-A, S5:OT-A                                                                                                                  |
| 370 | Yes         | 7       | 7-A  | 200    | McF_4 | Inf | unif   | singleC     | J1:OT, J1:OT-A, S5:OT, S5:OT-A                                                                                                             |
| 371 | Yes         | 7       | 7-A  | 200    | McF_4 | Inf | unif   | wholeT_0.01 | J1:OT, J1:OT-A, S5:OT, S5:OT-A                                                                                                             |
| 372 | Yes         | 7       | 7-A  | 200    | McF_4 | Inf | unif   | wholeT_0.5  | J1:OT, J1:OT-A, S5:OT, S5:OT-A                                                                                                             |
| 373 | Yes         | 7       | 7-A  | 200    | McF_6 | 0   | last   | singleC     | S5:OT-A                                                                                                                                    |
| 374 | Yes         | 7       | 7-A  | 200    | McF_6 | 0   | last   | wholeT_0.01 | S5:OT-A                                                                                                                                    |
| 375 | Yes         | 7       | 7-A  | 200    | McF_6 | 0   | last   | wholeT_0.5  | S5:OT-A                                                                                                                                    |
| 376 | Yes         | 7       | 7-A  | 200    | McF_6 | 0   | unif   | singleC     | J1:CBN-A, J1:OT, J1:OT-A, S5:CBN-A, S5:OT, S5:OT-A                                                                                         |
| 377 | Yes         | 7       | 7-A  | 200    | McF_6 | 0   | unif   | wholeT_0.01 | J1:CBN-A, J1:OT, J1:OT-A, S5:CBN-A, S5:OT, S5:OT-A                                                                                         |
| 378 | Yes         | 7       | 7-A  | 200    | McF_6 | 0   | unif   | wholeT_0.5  | J1:CBN-A, S5:CBN-A                                                                                                                         |
| 379 | Yes         | 7       | 7-A  | 200    | McF_6 | Inf | last   | singleC     | S5:OT-A                                                                                                                                    |
| 380 | Yes         | 7       | 7-A  | 200    | McF_6 | Inf | last   | wholeT_0.01 | S5:OT-A                                                                                                                                    |
| 381 | Yes         | 7       | 7-A  | 200    | McF_6 | Inf | last   | wholeT_0.5  | S5:OT-A                                                                                                                                    |

Table 13: (continued)

|     | Conjunction | Drivers | Tree | S.Size | Model | sh  | S.Time | S.Type      | Best method(s)                                                                                                                                                       |
|-----|-------------|---------|------|--------|-------|-----|--------|-------------|----------------------------------------------------------------------------------------------------------------------------------------------------------------------|
| 382 | Yes         | 7       | 7-A  | 200    | McF_6 | Inf | unif   | singleC     | J1:CBN-A, J1:OT, S5:CBN-A                                                                                                                                            |
| 383 | Yes         | 7       | 7-A  | 200    | McF_6 | Inf | unif   | wholeT_0.01 | J1:CBN-A, S5:CBN-A, S5:OT-A                                                                                                                                          |
| 384 | Yes         | 7       | 7-A  | 200    | McF_6 | Inf | unif   | wholeT_0.5  | J1:CBN-A, S5:CBN-A, S5:OT-A                                                                                                                                          |
| 385 | Yes         | 7       | 7-A  | 100    | Bozic | 0   | last   | singleC     | S5:OT-A                                                                                                                                                              |
| 386 | Yes         | 7       | 7-A  | 100    | Bozic | 0   | last   | wholeT_0.01 | J5:OT-A, S5:OT-A                                                                                                                                                     |
| 387 | Yes         | 7       | 7-A  | 100    | Bozic | 0   | last   | wholeT_0.5  | S5:OT-A                                                                                                                                                              |
| 388 | Yes         | 7       | 7-A  | 100    | Bozic | 0   | unif   | singleC     | J1:CBN, J1:CBN-A, J1:OT, J1:OT-A,<br>J5:DiP, J5:DiP-A, S1:OT, S1:OT-A,<br>S5:DiP-A                                                                                   |
| 389 | Yes         | 7       | 7-A  | 100    | Bozic | 0   | unif   | wholeT_0.01 | J5:CBN, J5:CBN-A, J5:OT, J5:OT-A,<br>S5:CBN-A                                                                                                                        |
| 390 | Yes         | 7       | 7-A  | 100    | Bozic | 0   | unif   | wholeT_0.5  | J1:CBN, J1:CBN-A, J1:OT, J1:OT-A,<br>J5:DiP, J5:DiP-A, S1:OT, S1:OT-A,<br>S5:DiP, S5:DiP-A                                                                           |
| 391 | Yes         | 7       | 7-A  | 100    | Bozic | Inf | last   | singleC     | J5:OT-A                                                                                                                                                              |
| 392 | Yes         | 7       | 7-A  | 100    | Bozic | Inf | last   | wholeT_0.01 | J5:OT-A                                                                                                                                                              |
| 393 | Yes         | 7       | 7-A  | 100    | Bozic | Inf | last   | wholeT_0.5  | J5:OT-A, S5:OT-A                                                                                                                                                     |
| 394 | Yes         | 7       | 7-A  | 100    | Bozic | Inf | unif   | singleC     | J1:CBN, J1:CBN-A, S5:CBN, S5:CBN-A                                                                                                                                   |
| 395 | Yes         | 7       | 7-A  | 100    | Bozic | Inf | unif   | wholeT_0.01 | J5:CBN, J5:CBN-A, J5:OT, J5:OT-A,<br>S5:CBN-A                                                                                                                        |
| 396 | Yes         | 7       | 7-A  | 100    | Bozic | Inf | unif   | wholeT_0.5  | J1:CBN, J1:CBN-A, S5:CBN, S5:CBN-A                                                                                                                                   |
| 397 | Yes         | 7       | 7-A  | 100    | exp   | 0   | last   | singleC     | S1:OT-A                                                                                                                                                              |
| 398 | Yes         | 7       | 7-A  | 100    | exp   | 0   | last   | wholeT_0.01 | J1:CBN-A, J1:OT-A, J5:CBN-A, J5:OT-A,<br>S1:OT-A, S5:OT-A                                                                                                            |
| 399 | Yes         | 7       | 7-A  | 100    | exp   | 0   | last   | wholeT_0.5  | S1:OT-A                                                                                                                                                              |
| 400 | Yes         | 7       | 7-A  | 100    | exp   | 0   | unif   | singleC     | J1:CBN, J1:CBN-A, J1:OT, J1:OT-A,<br>J5:DiP, J5:DiP-A, S1:CBN, S1:CBN-A,<br>S1:OT, S1:OT-A, S5:DiP, S5:DiP-A                                                         |
| 401 | Yes         | 7       | 7-A  | 100    | exp   | 0   | unif   | wholeT_0.01 | J1:CBN, J1:CBN-A, J1:OT, J1:OT-A,<br>J5:CBN, J5:CBN-A, J5:DiP, J5:DiP-A,<br>J5:OT, J5:OT-A, S1:OT, S1:OT-A,<br>S5:CBN, S5:CBN-A, S5:DiP, S5:DiP-A,<br>S5:OT, S5:OT-A |
| 402 | Yes         | 7       | 7-A  | 100    | exp   | 0   | unif   | wholeT_0.5  | J1:CBN, J1:CBN-A, J1:OT, J1:OT-A,<br>J5:DiP, J5:DiP-A, S1:CBN, S1:CBN-A,<br>S1:OT, S1:OT-A, S5:DiP, S5:DiP-A                                                         |
| 403 | Yes         | 7       | 7-A  | 100    | exp   | Inf | last   | singleC     | S5:OT-A                                                                                                                                                              |
| 404 | Yes         | 7       | 7-A  | 100    | exp   | Inf | last   | wholeT_0.01 | J5:OT-A                                                                                                                                                              |
| 405 | Yes         | 7       | 7-A  | 100    | exp   | Inf | last   | wholeT_0.5  | S5:OT-A                                                                                                                                                              |

Table 13: (continued)

|     | Conjunction | Drivers | Tree | S.Size | Model | sh  | S.Time | S.Type      | Best method(s)                                                                                                       |
|-----|-------------|---------|------|--------|-------|-----|--------|-------------|----------------------------------------------------------------------------------------------------------------------|
| 406 | Yes         | 7       | 7-A  | 100    | exp   | Inf | unif   | singleC     | J1:CBN, J1:CBN-A, J1:OT, J1:OT-A, J5:CBN, J5:CBN-A, J5:OT, J5:OT-A, S1:OT, S1:OT-A, S5:CBN, S5:CBN-A, S5:OT, S5:OT-A |
| 407 | Yes         | 7       | 7-A  | 100    | exp   | Inf | unif   | wholeT_0.01 | J5:CBN, J5:CBN-A, J5:OT, J5:OT-A, S5:OT, S5:OT-A                                                                     |
| 408 | Yes         | 7       | 7-A  | 100    | exp   | Inf | unif   | wholeT_0.5  | J1:CBN, J1:CBN-A, J1:OT, J1:OT-A, S1:CBN-A, S1:OT, S1:OT-A                                                           |
| 409 | Yes         | 7       | 7-A  | 100    | McF_4 | 0   | last   | singleC     | J5:OT-A, S5:OT-A                                                                                                     |
| 410 | Yes         | 7       | 7-A  | 100    | McF_4 | 0   | last   | wholeT_0.01 | S5:OT-A                                                                                                              |
| 411 | Yes         | 7       | 7-A  | 100    | McF_4 | 0   | last   | wholeT_0.5  | J1:OT-A, J5:OT-A, S5:OT-A                                                                                            |
| 412 | Yes         | 7       | 7-A  | 100    | McF_4 | 0   | unif   | singleC     | J1:OT, J1:OT-A, S5:OT, S5:OT-A                                                                                       |
| 413 | Yes         | 7       | 7-A  | 100    | McF_4 | 0   | unif   | wholeT_0.01 | J1:OT, J1:OT-A, S5:OT, S5:OT-A                                                                                       |
| 414 | Yes         | 7       | 7-A  | 100    | McF_4 | 0   | unif   | wholeT_0.5  | J1:OT, J1:OT-A, S5:OT, S5:OT-A                                                                                       |
| 415 | Yes         | 7       | 7-A  | 100    | McF_4 | Inf | last   | singleC     | J1:OT-A, J5:OT-A, S5:OT-A                                                                                            |
| 416 | Yes         | 7       | 7-A  | 100    | McF_4 | Inf | last   | wholeT_0.01 | J5:OT-A, S5:OT-A                                                                                                     |
| 417 | Yes         | 7       | 7-A  | 100    | McF_4 | Inf | last   | wholeT_0.5  | J5:OT-A, S5:OT-A                                                                                                     |
| 418 | Yes         | 7       | 7-A  | 100    | McF_4 | Inf | unif   | singleC     | J1:OT, J1:OT-A, S5:OT, S5:OT-A                                                                                       |
| 419 | Yes         | 7       | 7-A  | 100    | McF_4 | Inf | unif   | wholeT_0.01 | J1:OT-A, J5:OT-A, S5:OT, S5:OT-A                                                                                     |
| 420 | Yes         | 7       | 7-A  | 100    | McF_4 | Inf | unif   | wholeT_0.5  | J1:OT, J1:OT-A, J5:OT-A, S5:OT, S5:OT-A                                                                              |
| 421 | Yes         | 7       | 7-A  | 100    | McF_6 | 0   | last   | singleC     | S5:OT-A                                                                                                              |
| 422 | Yes         | 7       | 7-A  | 100    | McF_6 | 0   | last   | wholeT_0.01 | S5:OT-A                                                                                                              |
| 423 | Yes         | 7       | 7-A  | 100    | McF_6 | 0   | last   | wholeT_0.5  | S5:OT-A                                                                                                              |
| 424 | Yes         | 7       | 7-A  | 100    | McF_6 | 0   | unif   | singleC     | J1:CBN-A, S5:CBN-A, S5:OT-A                                                                                          |
| 425 | Yes         | 7       | 7-A  | 100    | McF_6 | 0   | unif   | wholeT_0.01 | J5:CBN-A, S5:CBN, S5:CBN-A, S5:OT, S5:OT-A                                                                           |
| 426 | Yes         | 7       | 7-A  | 100    | McF_6 | 0   | unif   | wholeT_0.5  | J1:CBN-A, J5:CBN-A, S5:CBN-A                                                                                         |
| 427 | Yes         | 7       | 7-A  | 100    | McF_6 | Inf | last   | singleC     | S5:OT-A                                                                                                              |
| 428 | Yes         | 7       | 7-A  | 100    | McF_6 | Inf | last   | wholeT_0.01 | S5:OT-A                                                                                                              |
| 429 | Yes         | 7       | 7-A  | 100    | McF_6 | Inf | last   | wholeT_0.5  | S5:OT-A                                                                                                              |
| 430 | Yes         | 7       | 7-A  | 100    | McF_6 | Inf | unif   | singleC     | S5:CBN-A                                                                                                             |
| 431 | Yes         | 7       | 7-A  | 100    | McF_6 | Inf | unif   | wholeT_0.01 | J5:CBN-A, S5:CBN-A                                                                                                   |
| 432 | Yes         | 7       | 7-A  | 100    | McF_6 | Inf | unif   | wholeT_0.5  | J1:CBN-A, J1:OT-A, J5:CBN-A, S5:CBN-A, S5:OT-A                                                                       |
| 433 | No          | 11      | 11-B | 1000   | Bozic | 0   | last   | singleC     | S1:OT, S1:OT-A                                                                                                       |
| 434 | No          | 11      | 11-B | 1000   | Bozic | 0   | last   | wholeT_0.01 | S1:DiP, S1:DiP-A, S5:DiP, S5:DiP-A                                                                                   |
| 435 | No          | 11      | 11-B | 1000   | Bozic | 0   | last   | wholeT_0.5  | S1:OT, S1:OT-A                                                                                                       |
| 436 | No          | 11      | 11-B | 1000   | Bozic | 0   | unif   | singleC     | S1:DiP, S1:DiP-A, S1:OT, S1:OT-A, S5:DiP, S5:DiP-A, S5:OT, S5:OT-A                                                   |

Table 13: (continued)

|     | Conjunction | Drivers | Tree | S.Size | Model | sh  | S.Time | S.Type      | Best method(s)                                                                                                                   |
|-----|-------------|---------|------|--------|-------|-----|--------|-------------|----------------------------------------------------------------------------------------------------------------------------------|
| 437 | No          | 11      | 11-B | 1000   | Bozic | 0   | unif   | wholeT_0.01 | J1:CBN-A, S1:OT-A, S5:DiP-A, S5:OT, S5:OT-A                                                                                      |
| 438 | No          | 11      | 11-B | 1000   | Bozic | 0   | unif   | wholeT_0.5  | S1:DiP, S1:DiP-A, S1:OT, S1:OT-A, S5:DiP, S5:DiP-A, S5:OT, S5:OT-A                                                               |
| 439 | No          | 11      | 11-B | 1000   | Bozic | Inf | last   | singleC     | S5:DiP, S5:DiP-A, S5:OT, S5:OT-A                                                                                                 |
| 440 | No          | 11      | 11-B | 1000   | Bozic | Inf | last   | wholeT_0.01 | J1:DiP, J1:DiP-A, J1:OT, J1:OT-A, J5:DiP, J5:DiP-A, J5:OT, J5:OT-A                                                               |
| 441 | No          | 11      | 11-B | 1000   | Bozic | Inf | last   | wholeT_0.5  | S5:DiP, S5:DiP-A, S5:OT, S5:OT-A                                                                                                 |
| 442 | No          | 11      | 11-B | 1000   | Bozic | Inf | unif   | singleC     | S1:CBN, S1:CBN-A, S1:DiP-A, S1:OT, S1:OT-A                                                                                       |
| 443 | No          | 11      | 11-B | 1000   | Bozic | Inf | unif   | wholeT_0.01 | J1:CBN-A, J1:DiP, J1:DiP-A, J1:OT, J1:OT-A, J5:DiP, J5:DiP-A, J5:OT, J5:OT-A, S5:CBN, S5:CBN-A, S5:DiP, S5:DiP-A, S5:OT, S5:OT-A |
| 444 | No          | 11      | 11-B | 1000   | Bozic | Inf | unif   | wholeT_0.5  | S1:CBN, S1:CBN-A, S1:OT, S1:OT-A                                                                                                 |
| 445 | No          | 11      | 11-B | 1000   | exp   | 0   | last   | singleC     | S1:OT, S1:OT-A                                                                                                                   |
| 446 | No          | 11      | 11-B | 1000   | exp   | 0   | last   | wholeT_0.01 | S1:DiP-A, S1:OT, S1:OT-A, S5:DiP, S5:DiP-A, S5:OT, S5:OT-A                                                                       |
| 447 | No          | 11      | 11-B | 1000   | exp   | 0   | last   | wholeT_0.5  | S1:OT, S1:OT-A                                                                                                                   |
| 448 | No          | 11      | 11-B | 1000   | exp   | 0   | unif   | singleC     | S1:DiP, S1:DiP-A, S1:OT, S1:OT-A, S5:DiP, S5:DiP-A, S5:OT, S5:OT-A                                                               |
| 449 | No          | 11      | 11-B | 1000   | exp   | 0   | unif   | wholeT_0.01 | S1:DiP, S1:DiP-A, S1:OT, S1:OT-A                                                                                                 |
| 450 | No          | 11      | 11-B | 1000   | exp   | 0   | unif   | wholeT_0.5  | S1:DiP, S1:DiP-A, S1:OT, S1:OT-A, S5:DiP, S5:DiP-A, S5:OT, S5:OT-A                                                               |
| 451 | No          | 11      | 11-B | 1000   | exp   | Inf | last   | singleC     | S5:DiP, S5:DiP-A, S5:OT, S5:OT-A                                                                                                 |
| 452 | No          | 11      | 11-B | 1000   | exp   | Inf | last   | wholeT_0.01 | S5:DiP, S5:DiP-A, S5:OT, S5:OT-A                                                                                                 |
| 453 | No          | 11      | 11-B | 1000   | exp   | Inf | last   | wholeT_0.5  | S5:DiP, S5:DiP-A, S5:OT, S5:OT-A                                                                                                 |
| 454 | No          | 11      | 11-B | 1000   | exp   | Inf | unif   | singleC     | S1:CBN, S1:CBN-A, S1:OT                                                                                                          |
| 455 | No          | 11      | 11-B | 1000   | exp   | Inf | unif   | wholeT_0.01 | J5:OT, S5:DiP, S5:DiP-A, S5:OT, S5:OT-A                                                                                          |
| 456 | No          | 11      | 11-B | 1000   | exp   | Inf | unif   | wholeT_0.5  | S1:CBN, S1:CBN-A, S1:OT, S1:OT-A                                                                                                 |
| 457 | No          | 11      | 11-B | 1000   | McF_4 | 0   | last   | singleC     | S1:DiP, S1:DiP-A, S1:OT, S1:OT-A                                                                                                 |
| 458 | No          | 11      | 11-B | 1000   | McF_4 | 0   | last   | wholeT_0.01 | S1:DiP, S1:DiP-A, S1:OT, S1:OT-A, S5:DiP, S5:DiP-A, S5:OT, S5:OT-A                                                               |
| 459 | No          | 11      | 11-B | 1000   | McF_4 | 0   | last   | wholeT_0.5  | S1:DiP-A, S1:OT, S1:OT-A                                                                                                         |
| 460 | No          | 11      | 11-B | 1000   | McF_4 | 0   | unif   | singleC     | S1:DiP, S1:DiP-A, S1:OT, S1:OT-A                                                                                                 |
| 461 | No          | 11      | 11-B | 1000   | McF_4 | 0   | unif   | wholeT_0.01 | S1:OT, S1:OT-A                                                                                                                   |
| 462 | No          | 11      | 11-B | 1000   | McF_4 | 0   | unif   | wholeT_0.5  | S1:DiP, S1:DiP-A, S1:OT, S1:OT-A                                                                                                 |
| 463 | No          | 11      | 11-B | 1000   | McF_4 | Inf | last   | singleC     | S1:OT, S1:OT-A                                                                                                                   |
| 464 | No          | 11      | 11-B | 1000   | McF_4 | Inf | last   | wholeT_0.01 | S5:DiP, S5:DiP-A, S5:OT, S5:OT-A                                                                                                 |

Table 13: (continued)

|     | Conjunction | Drivers | Tree | S.Size | Model | sh  | S.Time | S.Type      | Best method(s)                                                     |
|-----|-------------|---------|------|--------|-------|-----|--------|-------------|--------------------------------------------------------------------|
| 465 | No          | 11      | 11-B | 1000   | McF_4 | Inf | last   | wholeT_0.5  | S1:DiP-A, S1:OT, S1:OT-A                                           |
| 466 | No          | 11      | 11-B | 1000   | McF_4 | Inf | unif   | singleC     | S1:OT, S1:OT-A                                                     |
| 467 | No          | 11      | 11-B | 1000   | McF_4 | Inf | unif   | wholeT_0.01 | S5:DiP, S5:DiP-A, S5:OT, S5:OT-A                                   |
| 468 | No          | 11      | 11-B | 1000   | McF_4 | Inf | unif   | wholeT_0.5  | S1:OT, S1:OT-A                                                     |
| 469 | No          | 11      | 11-B | 1000   | McF_6 | 0   | last   | singleC     | S1:OT, S5:DiP, S5:OT                                               |
| 470 | No          | 11      | 11-B | 1000   | McF_6 | 0   | last   | wholeT_0.01 | S5:DiP, S5:OT                                                      |
| 471 | No          | 11      | 11-B | 1000   | McF_6 | 0   | last   | wholeT_0.5  | S1:OT, S5:DiP, S5:OT                                               |
| 472 | No          | 11      | 11-B | 1000   | McF_6 | 0   | unif   | singleC     | S1:DiP, S1:DiP-A, S1:OT, S1:OT-A                                   |
| 473 | No          | 11      | 11-B | 1000   | McF_6 | 0   | unif   | wholeT_0.01 | S1:DiP, S1:DiP-A, S1:OT, S1:OT-A                                   |
| 474 | No          | 11      | 11-B | 1000   | McF_6 | 0   | unif   | wholeT_0.5  | S1:DiP, S1:DiP-A, S1:OT-A                                          |
| 475 | No          | 11      | 11-B | 1000   | McF_6 | Inf | last   | singleC     | S1:OT, S5:DiP, S5:OT                                               |
| 476 | No          | 11      | 11-B | 1000   | McF_6 | Inf | last   | wholeT_0.01 | S5:OT                                                              |
| 477 | No          | 11      | 11-B | 1000   | McF_6 | Inf | last   | wholeT_0.5  | S1:DiP, S1:OT, S5:DiP, S5:OT                                       |
| 478 | No          | 11      | 11-B | 1000   | McF_6 | Inf | unif   | singleC     | S1:DiP, S1:DiP-A, S1:OT                                            |
| 479 | No          | 11      | 11-B | 1000   | McF_6 | Inf | unif   | wholeT_0.01 | S1:DiP, S1:DiP-A                                                   |
| 480 | No          | 11      | 11-B | 1000   | McF_6 | Inf | unif   | wholeT_0.5  | S1:DiP, S1:DiP-A                                                   |
| 481 | No          | 11      | 11-B | 200    | Bozic | 0   | last   | singleC     | S1:OT, S1:OT-A                                                     |
| 482 | No          | 11      | 11-B | 200    | Bozic | 0   | last   | wholeT_0.01 | J1:OT, J1:OT-A, J5:OT, J5:OT-A, S5:OT, S5:OT-A                     |
| 483 | No          | 11      | 11-B | 200    | Bozic | 0   | last   | wholeT_0.5  | S1:OT, S1:OT-A                                                     |
| 484 | No          | 11      | 11-B | 200    | Bozic | 0   | unif   | singleC     | S1:OT, S1:OT-A                                                     |
| 485 | No          | 11      | 11-B | 200    | Bozic | 0   | unif   | wholeT_0.01 | J1:CBN-A, S5:DiP-A, S5:OT, S5:OT-A                                 |
| 486 | No          | 11      | 11-B | 200    | Bozic | 0   | unif   | wholeT_0.5  | S1:OT, S1:OT-A, S5:DiP, S5:DiP-A, S5:OT, S5:OT-A                   |
| 487 | No          | 11      | 11-B | 200    | Bozic | Inf | last   | singleC     | S5:OT, S5:OT-A                                                     |
| 488 | No          | 11      | 11-B | 200    | Bozic | Inf | last   | wholeT_0.01 | J5:OT, J5:OT-A                                                     |
| 489 | No          | 11      | 11-B | 200    | Bozic | Inf | last   | wholeT_0.5  | S5:OT, S5:OT-A                                                     |
| 490 | No          | 11      | 11-B | 200    | Bozic | Inf | unif   | singleC     | J1:CBN, J1:CBN-A, J1:OT, J1:OT-A, S5:DiP, S5:DiP-A, S5:OT, S5:OT-A |
| 491 | No          | 11      | 11-B | 200    | Bozic | Inf | unif   | wholeT_0.01 | J5:CBN-A, J5:OT, J5:OT-A, S5:CBN, S5:CBN-A, S5:OT, S5:OT-A         |
| 492 | No          | 11      | 11-B | 200    | Bozic | Inf | unif   | wholeT_0.5  | J1:CBN, J1:CBN-A, J1:OT, J1:OT-A, S5:OT, S5:OT-A                   |
| 493 | No          | 11      | 11-B | 200    | exp   | 0   | last   | singleC     | S1:OT, S1:OT-A                                                     |
| 494 | No          | 11      | 11-B | 200    | exp   | 0   | last   | wholeT_0.01 | S1:OT, S1:OT-A, S5:OT, S5:OT-A                                     |
| 495 | No          | 11      | 11-B | 200    | exp   | 0   | last   | wholeT_0.5  | S1:OT, S1:OT-A                                                     |
| 496 | No          | 11      | 11-B | 200    | exp   | 0   | unif   | singleC     | S1:DiP, S1:DiP-A, S1:OT, S1:OT-A, S5:DiP, S5:DiP-A, S5:OT, S5:OT-A |
| 497 | No          | 11      | 11-B | 200    | exp   | 0   | unif   | wholeT_0.01 | S1:OT, S1:OT-A                                                     |

Table 13: (continued)

|     | Conjunction | Drivers | Tree | S.Size | Model | sh  | S.Time | S.Type      | Best method(s)                                             |
|-----|-------------|---------|------|--------|-------|-----|--------|-------------|------------------------------------------------------------|
| 498 | No          | 11      | 11-B | 200    | exp   | 0   | unif   | wholeT_0.5  | S1:DiP, S1:DiP-A, S1:OT, S1:OT-A, S5:DiP-A, S5:OT, S5:OT-A |
| 499 | No          | 11      | 11-B | 200    | exp   | Inf | last   | singleC     | S5:OT                                                      |
| 500 | No          | 11      | 11-B | 200    | exp   | Inf | last   | wholeT_0.01 | J5:OT, J5:OT-A                                             |
| 501 | No          | 11      | 11-B | 200    | exp   | Inf | last   | wholeT_0.5  | S5:OT, S5:OT-A                                             |
| 502 | No          | 11      | 11-B | 200    | exp   | Inf | unif   | singleC     | S1:OT, S1:OT-A                                             |
| 503 | No          | 11      | 11-B | 200    | exp   | Inf | unif   | wholeT_0.01 | S5:OT, S5:OT-A                                             |
| 504 | No          | 11      | 11-B | 200    | exp   | Inf | unif   | wholeT_0.5  | S1:OT, S1:OT-A                                             |
| 505 | No          | 11      | 11-B | 200    | McF_4 | 0   | last   | singleC     | S1:OT, S1:OT-A, S5:OT, S5:OT-A                             |
| 506 | No          | 11      | 11-B | 200    | McF_4 | 0   | last   | wholeT_0.01 | S5:OT, S5:OT-A                                             |
| 507 | No          | 11      | 11-B | 200    | McF_4 | 0   | last   | wholeT_0.5  | S1:OT, S1:OT-A, S5:OT, S5:OT-A                             |
| 508 | No          | 11      | 11-B | 200    | McF_4 | 0   | unif   | singleC     | S1:OT, S1:OT-A, S5:CBN-A, S5:OT, S5:OT-A                   |
| 509 | No          | 11      | 11-B | 200    | McF_4 | 0   | unif   | wholeT_0.01 | S5:OT, S5:OT-A                                             |
| 510 | No          | 11      | 11-B | 200    | McF_4 | 0   | unif   | wholeT_0.5  | S1:OT, S1:OT-A, S5:OT, S5:OT-A                             |
| 511 | No          | 11      | 11-B | 200    | McF_4 | Inf | last   | singleC     | S1:OT, S1:OT-A, S5:OT, S5:OT-A                             |
| 512 | No          | 11      | 11-B | 200    | McF_4 | Inf | last   | wholeT_0.01 | S5:OT, S5:OT-A                                             |
| 513 | No          | 11      | 11-B | 200    | McF_4 | Inf | last   | wholeT_0.5  | S1:OT, S1:OT-A                                             |
| 514 | No          | 11      | 11-B | 200    | McF_4 | Inf | unif   | singleC     | S1:OT, S1:OT-A, S5:CBN-A, S5:OT, S5:OT-A                   |
| 515 | No          | 11      | 11-B | 200    | McF_4 | Inf | unif   | wholeT_0.01 | S5:CBN-A, S5:OT, S5:OT-A                                   |
| 516 | No          | 11      | 11-B | 200    | McF_4 | Inf | unif   | wholeT_0.5  | S1:OT, S1:OT-A, S5:OT, S5:OT-A                             |
| 517 | No          | 11      | 11-B | 200    | McF_6 | 0   | last   | singleC     | S5:OT                                                      |
| 518 | No          | 11      | 11-B | 200    | McF_6 | 0   | last   | wholeT_0.01 | S5:OT                                                      |
| 519 | No          | 11      | 11-B | 200    | McF_6 | 0   | last   | wholeT_0.5  | S5:OT                                                      |
| 520 | No          | 11      | 11-B | 200    | McF_6 | 0   | unif   | singleC     | J1:CBN-A, S1:OT, S1:OT-A, S5:CBN-A, S5:OT, S5:OT-A         |
| 521 | No          | 11      | 11-B | 200    | McF_6 | 0   | unif   | wholeT_0.01 | S1:OT, S1:OT-A, S5:OT, S5:OT-A                             |
| 522 | No          | 11      | 11-B | 200    | McF_6 | 0   | unif   | wholeT_0.5  | S1:OT, S1:OT-A, S5:CBN, S5:OT, S5:OT-A                     |
| 523 | No          | 11      | 11-B | 200    | McF_6 | Inf | last   | singleC     | S5:OT                                                      |
| 524 | No          | 11      | 11-B | 200    | McF_6 | Inf | last   | wholeT_0.01 | S5:OT                                                      |
| 525 | No          | 11      | 11-B | 200    | McF_6 | Inf | last   | wholeT_0.5  | S5:OT                                                      |
| 526 | No          | 11      | 11-B | 200    | McF_6 | Inf | unif   | singleC     | J1:CBN-A, S1:OT, S1:OT-A, S5:CBN, S5:CBN-A, S5:OT, S5:OT-A |
| 527 | No          | 11      | 11-B | 200    | McF_6 | Inf | unif   | wholeT_0.01 | S1:OT, S5:CBN, S5:CBN-A, S5:OT, S5:OT-A                    |
| 528 | No          | 11      | 11-B | 200    | McF_6 | Inf | unif   | wholeT_0.5  | J1:CBN-A, S1:OT, S1:OT-A, S5:CBN, S5:CBN-A, S5:OT, S5:OT-A |
| 529 | No          | 11      | 11-B | 100    | Bozic | 0   | last   | singleC     | S5:OT, S5:OT-A                                             |

Table 13: (continued)

|     | Conjunction | Drivers | Tree | S.Size | Model | sh  | S.Time | S.Type      | Best method(s)                                                   |
|-----|-------------|---------|------|--------|-------|-----|--------|-------------|------------------------------------------------------------------|
| 530 | No          | 11      | 11-B | 100    | Bozic | 0   | last   | wholeT_0.01 | J1:OT, J1:OT-A, J5:CBN-A, J5:OT, J5:OT-A, S5:OT, S5:OT-A         |
| 531 | No          | 11      | 11-B | 100    | Bozic | 0   | last   | wholeT_0.5  | S1:OT, S1:OT-A, S5:DiP, S5:OT, S5:OT-A                           |
| 532 | No          | 11      | 11-B | 100    | Bozic | 0   | unif   | singleC     | S5:DiP, S5:DiP-A, S5:OT, S5:OT-A                                 |
| 533 | No          | 11      | 11-B | 100    | Bozic | 0   | unif   | wholeT_0.01 | S5:CBN, S5:OT, S5:OT-A                                           |
| 534 | No          | 11      | 11-B | 100    | Bozic | 0   | unif   | wholeT_0.5  | J1:OT, S5:DiP, S5:DiP-A, S5:OT, S5:OT-A                          |
| 535 | No          | 11      | 11-B | 100    | Bozic | Inf | last   | singleC     | S5:OT, S5:OT-A                                                   |
| 536 | No          | 11      | 11-B | 100    | Bozic | Inf | last   | wholeT_0.01 | J5:OT, J5:OT-A                                                   |
| 537 | No          | 11      | 11-B | 100    | Bozic | Inf | last   | wholeT_0.5  | J5:OT, J5:OT-A, S5:OT, S5:OT-A                                   |
| 538 | No          | 11      | 11-B | 100    | Bozic | Inf | unif   | singleC     | J1:OT, J1:OT-A, J5:DiP, J5:OT-A, S5:CBN-A, S5:OT, S5:OT-A        |
| 539 | No          | 11      | 11-B | 100    | Bozic | Inf | unif   | wholeT_0.01 | J5:CBN-A, J5:OT, J5:OT-A, S5:CBN-A, S5:OT, S5:OT-A               |
| 540 | No          | 11      | 11-B | 100    | Bozic | Inf | unif   | wholeT_0.5  | S5:OT, S5:OT-A                                                   |
| 541 | No          | 11      | 11-B | 100    | exp   | 0   | last   | singleC     | S1:OT, S1:OT-A                                                   |
| 542 | No          | 11      | 11-B | 100    | exp   | 0   | last   | wholeT_0.01 | S1:OT, S1:OT-A, S5:OT, S5:OT-A                                   |
| 543 | No          | 11      | 11-B | 100    | exp   | 0   | last   | wholeT_0.5  | S1:OT, S1:OT-A                                                   |
| 544 | No          | 11      | 11-B | 100    | exp   | 0   | unif   | singleC     | S1:CBN-A, S1:OT, S1:OT-A, S5:DiP, S5:DiP-A, S5:OT, S5:OT-A       |
| 545 | No          | 11      | 11-B | 100    | exp   | 0   | unif   | wholeT_0.01 | J1:OT, J1:OT-A, S1:OT, S1:OT-A, S5:DiP, S5:DiP-A, S5:OT, S5:OT-A |
| 546 | No          | 11      | 11-B | 100    | exp   | 0   | unif   | wholeT_0.5  | S1:OT, S1:OT-A, S5:DiP, S5:DiP-A, S5:OT, S5:OT-A                 |
| 547 | No          | 11      | 11-B | 100    | exp   | Inf | last   | singleC     | S5:OT, S5:OT-A                                                   |
| 548 | No          | 11      | 11-B | 100    | exp   | Inf | last   | wholeT_0.01 | J5:CBN-A, J5:OT, J5:OT-A                                         |
| 549 | No          | 11      | 11-B | 100    | exp   | Inf | last   | wholeT_0.5  | S5:OT, S5:OT-A                                                   |
| 550 | No          | 11      | 11-B | 100    | exp   | Inf | unif   | singleC     | J1:OT, J1:OT-A, S5:DiP, S5:DiP-A, S5:OT, S5:OT-A                 |
| 551 | No          | 11      | 11-B | 100    | exp   | Inf | unif   | wholeT_0.01 | S5:OT, S5:OT-A                                                   |
| 552 | No          | 11      | 11-B | 100    | exp   | Inf | unif   | wholeT_0.5  | J1:OT, J1:OT-A, S5:DiP, S5:DiP-A, S5:OT, S5:OT-A                 |
| 553 | No          | 11      | 11-B | 100    | McF_4 | 0   | last   | singleC     | S1:OT, S1:OT-A, S5:OT, S5:OT-A                                   |
| 554 | No          | 11      | 11-B | 100    | McF_4 | 0   | last   | wholeT_0.01 | S5:OT, S5:OT-A                                                   |
| 555 | No          | 11      | 11-B | 100    | McF_4 | 0   | last   | wholeT_0.5  | S1:OT, S1:OT-A, S5:OT, S5:OT-A                                   |
| 556 | No          | 11      | 11-B | 100    | McF_4 | 0   | unif   | singleC     | S5:CBN-A, S5:OT, S5:OT-A                                         |
| 557 | No          | 11      | 11-B | 100    | McF_4 | 0   | unif   | wholeT_0.01 | S5:CBN, S5:CBN-A, S5:OT, S5:OT-A                                 |
| 558 | No          | 11      | 11-B | 100    | McF_4 | 0   | unif   | wholeT_0.5  | S5:OT, S5:OT-A                                                   |
| 559 | No          | 11      | 11-B | 100    | McF_4 | Inf | last   | singleC     | S1:OT, S1:OT-A, S5:OT, S5:OT-A                                   |



Table 13: (continued)

|     | Conjunction | Drivers | Tree | S.Size | Model | sh  | S.Time | S.Type      | Best method(s)                                                                         |
|-----|-------------|---------|------|--------|-------|-----|--------|-------------|----------------------------------------------------------------------------------------|
| 560 | No          | 11      | 11-B | 100    | McF_4 | Inf | last   | wholeT_0.01 | S5:OT, S5:OT-A                                                                         |
| 561 | No          | 11      | 11-B | 100    | McF_4 | Inf | last   | wholeT_0.5  | S1:OT, S1:OT-A, S5:OT, S5:OT-A                                                         |
| 562 | No          | 11      | 11-B | 100    | McF_4 | Inf | unif   | singleC     | S1:OT, S1:OT-A, S5:CBN-A, S5:OT, S5:OT-A                                               |
| 563 | No          | 11      | 11-B | 100    | McF_4 | Inf | unif   | wholeT_0.01 | S5:CBN-A, S5:OT, S5:OT-A                                                               |
| 564 | No          | 11      | 11-B | 100    | McF_4 | Inf | unif   | wholeT_0.5  | S1:OT, S1:OT-A, S5:OT, S5:OT-A                                                         |
| 565 | No          | 11      | 11-B | 100    | McF_6 | 0   | last   | singleC     | S5:OT                                                                                  |
| 566 | No          | 11      | 11-B | 100    | McF_6 | 0   | last   | wholeT_0.01 | S5:OT                                                                                  |
| 567 | No          | 11      | 11-B | 100    | McF_6 | 0   | last   | wholeT_0.5  | S5:OT                                                                                  |
| 568 | No          | 11      | 11-B | 100    | McF_6 | 0   | unif   | singleC     | S1:OT, S1:OT-A, S5:CBN, S5:CBN-A, S5:OT, S5:OT-A                                       |
| 569 | No          | 11      | 11-B | 100    | McF_6 | 0   | unif   | wholeT_0.01 | S5:CBN-A, S5:OT, S5:OT-A                                                               |
| 570 | No          | 11      | 11-B | 100    | McF_6 | 0   | unif   | wholeT_0.5  | J1:CBN, J1:CBN-A, S1:OT, S1:OT-A, S5:CBN, S5:CBN-A, S5:OT, S5:OT-A                     |
| 571 | No          | 11      | 11-B | 100    | McF_6 | Inf | last   | singleC     | S5:OT                                                                                  |
| 572 | No          | 11      | 11-B | 100    | McF_6 | Inf | last   | wholeT_0.01 | S5:OT, S5:OT-A                                                                         |
| 573 | No          | 11      | 11-B | 100    | McF_6 | Inf | last   | wholeT_0.5  | S5:OT                                                                                  |
| 574 | No          | 11      | 11-B | 100    | McF_6 | Inf | unif   | singleC     | S5:CBN, S5:CBN-A, S5:OT, S5:OT-A                                                       |
| 575 | No          | 11      | 11-B | 100    | McF_6 | Inf | unif   | wholeT_0.01 | S5:CBN, S5:CBN-A, S5:OT, S5:OT-A                                                       |
| 576 | No          | 11      | 11-B | 100    | McF_6 | Inf | unif   | wholeT_0.5  | S1:OT, S1:OT-A, S5:CBN-A, S5:OT, S5:OT-A                                               |
| 577 | No          | 9       | 9-B  | 1000   | Bozic | 0   | last   | singleC     | S1:OT, S1:OT-A                                                                         |
| 578 | No          | 9       | 9-B  | 1000   | Bozic | 0   | last   | wholeT_0.01 | S1:CBN-A, S1:DiP, S1:DiP-A, S1:OT, S1:OT-A, S5:CBN-A, S5:DiP, S5:DiP-A, S5:OT, S5:OT-A |
| 579 | No          | 9       | 9-B  | 1000   | Bozic | 0   | last   | wholeT_0.5  | S1:OT, S1:OT-A                                                                         |
| 580 | No          | 9       | 9-B  | 1000   | Bozic | 0   | unif   | singleC     | S1:DiP, S1:DiP-A, S1:OT, S1:OT-A, S5:DiP, S5:DiP-A, S5:OT, S5:OT-A                     |
| 581 | No          | 9       | 9-B  | 1000   | Bozic | 0   | unif   | wholeT_0.01 | J1:DiP, J1:DiP-A, J1:OT, J1:OT-A, S1:DiP, S1:DiP-A, S1:OT, S1:OT-A                     |
| 582 | No          | 9       | 9-B  | 1000   | Bozic | 0   | unif   | wholeT_0.5  | S1:DiP, S1:DiP-A, S1:OT, S1:OT-A, S5:DiP, S5:DiP-A, S5:OT, S5:OT-A                     |
| 583 | No          | 9       | 9-B  | 1000   | Bozic | Inf | last   | singleC     | S5:DiP, S5:DiP-A, S5:OT, S5:OT-A                                                       |
| 584 | No          | 9       | 9-B  | 1000   | Bozic | Inf | last   | wholeT_0.01 | J5:DiP, J5:DiP-A                                                                       |
| 585 | No          | 9       | 9-B  | 1000   | Bozic | Inf | last   | wholeT_0.5  | S5:DiP, S5:DiP-A, S5:OT, S5:OT-A                                                       |
| 586 | No          | 9       | 9-B  | 1000   | Bozic | Inf | unif   | singleC     | S1:CBN, S1:CBN-A, S1:OT, S1:OT-A                                                       |
| 587 | No          | 9       | 9-B  | 1000   | Bozic | Inf | unif   | wholeT_0.01 | J1:CBN-A, S5:CBN, S5:CBN-A, S5:DiP, S5:DiP-A, S5:OT, S5:OT-A                           |
| 588 | No          | 9       | 9-B  | 1000   | Bozic | Inf | unif   | wholeT_0.5  | S1:CBN, S1:CBN-A, S1:OT, S1:OT-A                                                       |
| 589 | No          | 9       | 9-B  | 1000   | exp   | 0   | last   | singleC     | S1:OT, S1:OT-A                                                                         |

Table 13: (continued)

|     | Conjunction | Drivers | Tree | S.Size | Model | sh  | S.Time | S.Type      | Best method(s)                                                                           |
|-----|-------------|---------|------|--------|-------|-----|--------|-------------|------------------------------------------------------------------------------------------|
| 590 | No          | 9       | 9-B  | 1000   | exp   | 0   | last   | wholeT_0.01 | S1:DiP-A, S1:OT, S1:OT-A                                                                 |
| 591 | No          | 9       | 9-B  | 1000   | exp   | 0   | last   | wholeT_0.5  | S1:DiP, S1:DiP-A, S1:OT, S1:OT-A,<br>S5:DiP, S5:DiP-A, S5:OT, S5:OT-A                    |
| 592 | No          | 9       | 9-B  | 1000   | exp   | 0   | unif   | singleC     | S1:DiP, S1:DiP-A, S1:OT, S1:OT-A,<br>S5:DiP, S5:DiP-A, S5:OT, S5:OT-A                    |
| 593 | No          | 9       | 9-B  | 1000   | exp   | 0   | unif   | wholeT_0.01 | S1:DiP-A, S1:OT, S1:OT-A, S5:DiP-A,<br>S5:OT, S5:OT-A                                    |
| 594 | No          | 9       | 9-B  | 1000   | exp   | 0   | unif   | wholeT_0.5  | S1:DiP, S1:DiP-A, S1:OT, S1:OT-A,<br>S5:DiP, S5:DiP-A, S5:OT, S5:OT-A                    |
| 595 | No          | 9       | 9-B  | 1000   | exp   | Inf | last   | singleC     | S5:DiP, S5:DiP-A, S5:OT, S5:OT-A                                                         |
| 596 | No          | 9       | 9-B  | 1000   | exp   | Inf | last   | wholeT_0.01 | J1:DiP, J1:DiP-A, J5:DiP, J5:DiP-A,<br>S5:DiP, S5:DiP-A                                  |
| 597 | No          | 9       | 9-B  | 1000   | exp   | Inf | last   | wholeT_0.5  | S5:DiP, S5:DiP-A, S5:OT, S5:OT-A                                                         |
| 598 | No          | 9       | 9-B  | 1000   | exp   | Inf | unif   | singleC     | S1:OT, S1:OT-A                                                                           |
| 599 | No          | 9       | 9-B  | 1000   | exp   | Inf | unif   | wholeT_0.01 | J1:OT, J1:OT-A, J5:DiP, J5:DiP-A,<br>J5:OT, J5:OT-A, S5:DiP, S5:DiP-A,<br>S5:OT, S5:OT-A |
| 600 | No          | 9       | 9-B  | 1000   | exp   | Inf | unif   | wholeT_0.5  | S1:OT, S1:OT-A                                                                           |
| 601 | No          | 9       | 9-B  | 1000   | McF_4 | 0   | last   | singleC     | S1:DiP-A, S1:OT, S1:OT-A                                                                 |
| 602 | No          | 9       | 9-B  | 1000   | McF_4 | 0   | last   | wholeT_0.01 | S5:DiP, S5:DiP-A, S5:OT, S5:OT-A                                                         |
| 603 | No          | 9       | 9-B  | 1000   | McF_4 | 0   | last   | wholeT_0.5  | S1:OT, S1:OT-A                                                                           |
| 604 | No          | 9       | 9-B  | 1000   | McF_4 | 0   | unif   | singleC     | S1:DiP, S1:DiP-A, S1:OT, S1:OT-A                                                         |
| 605 | No          | 9       | 9-B  | 1000   | McF_4 | 0   | unif   | wholeT_0.01 | S1:OT, S1:OT-A, S5:DiP, S5:DiP-A,<br>S5:OT, S5:OT-A                                      |
| 606 | No          | 9       | 9-B  | 1000   | McF_4 | 0   | unif   | wholeT_0.5  | S1:DiP, S1:DiP-A, S1:OT, S1:OT-A                                                         |
| 607 | No          | 9       | 9-B  | 1000   | McF_4 | Inf | last   | singleC     | S1:OT, S1:OT-A                                                                           |
| 608 | No          | 9       | 9-B  | 1000   | McF_4 | Inf | last   | wholeT_0.01 | S5:DiP, S5:DiP-A, S5:OT, S5:OT-A                                                         |
| 609 | No          | 9       | 9-B  | 1000   | McF_4 | Inf | last   | wholeT_0.5  | S1:OT, S1:OT-A                                                                           |
| 610 | No          | 9       | 9-B  | 1000   | McF_4 | Inf | unif   | singleC     | S1:DiP, S1:DiP-A, S1:OT, S1:OT-A                                                         |
| 611 | No          | 9       | 9-B  | 1000   | McF_4 | Inf | unif   | wholeT_0.01 | S5:DiP, S5:DiP-A, S5:OT, S5:OT-A                                                         |
| 612 | No          | 9       | 9-B  | 1000   | McF_4 | Inf | unif   | wholeT_0.5  | S1:DiP, S1:DiP-A, S1:OT, S1:OT-A                                                         |
| 613 | No          | 9       | 9-B  | 1000   | McF_6 | 0   | last   | singleC     | S5:OT                                                                                    |
| 614 | No          | 9       | 9-B  | 1000   | McF_6 | 0   | last   | wholeT_0.01 | J1:OT, S5:OT                                                                             |
| 615 | No          | 9       | 9-B  | 1000   | McF_6 | 0   | last   | wholeT_0.5  | S1:OT, S5:OT                                                                             |
| 616 | No          | 9       | 9-B  | 1000   | McF_6 | 0   | unif   | singleC     | S1:DiP, S1:DiP-A, S1:OT, S1:OT-A                                                         |
| 617 | No          | 9       | 9-B  | 1000   | McF_6 | 0   | unif   | wholeT_0.01 | S5:CBN, S5:DiP, S5:DiP-A, S5:OT,<br>S5:OT-A                                              |
| 618 | No          | 9       | 9-B  | 1000   | McF_6 | 0   | unif   | wholeT_0.5  | S1:DiP, S1:DiP-A, S1:OT, S1:OT-A                                                         |
| 619 | No          | 9       | 9-B  | 1000   | McF_6 | Inf | last   | singleC     | S5:DiP, S5:DiP-A, S5:OT, S5:OT-A                                                         |
| 620 | No          | 9       | 9-B  | 1000   | McF_6 | Inf | last   | wholeT_0.01 | S5:DiP, S5:DiP-A, S5:OT-A                                                                |

Table 13: (continued)

|     | Conjunction | Drivers | Tree | S.Size | Model | sh  | S.Time | S.Type      | Best method(s)                                                                     |
|-----|-------------|---------|------|--------|-------|-----|--------|-------------|------------------------------------------------------------------------------------|
| 621 | No          | 9       | 9-B  | 1000   | McF_6 | Inf | last   | wholeT_0.5  | S1:DiP, S1:DiP-A, S1:OT-A, S5:DiP, S5:DiP-A, S5:OT-A                               |
| 622 | No          | 9       | 9-B  | 1000   | McF_6 | Inf | unif   | singleC     | S1:DiP, S1:DiP-A, S1:OT, S1:OT-A                                                   |
| 623 | No          | 9       | 9-B  | 1000   | McF_6 | Inf | unif   | wholeT_0.01 | S5:DiP, S5:DiP-A, S5:OT, S5:OT-A                                                   |
| 624 | No          | 9       | 9-B  | 1000   | McF_6 | Inf | unif   | wholeT_0.5  | S1:DiP, S1:DiP-A, S1:OT, S1:OT-A                                                   |
| 625 | No          | 9       | 9-B  | 200    | Bozic | 0   | last   | singleC     | S1:OT, S1:OT-A                                                                     |
| 626 | No          | 9       | 9-B  | 200    | Bozic | 0   | last   | wholeT_0.01 | S5:OT, S5:OT-A                                                                     |
| 627 | No          | 9       | 9-B  | 200    | Bozic | 0   | last   | wholeT_0.5  | S1:OT, S1:OT-A                                                                     |
| 628 | No          | 9       | 9-B  | 200    | Bozic | 0   | unif   | singleC     | S1:OT, S1:OT-A, S5:DiP, S5:DiP-A, S5:OT, S5:OT-A                                   |
| 629 | No          | 9       | 9-B  | 200    | Bozic | 0   | unif   | wholeT_0.01 | J1:DiP-A, J1:OT, J1:OT-A, S5:DiP, S5:DiP-A, S5:OT, S5:OT-A                         |
| 630 | No          | 9       | 9-B  | 200    | Bozic | 0   | unif   | wholeT_0.5  | S1:OT, S1:OT-A, S5:DiP, S5:DiP-A, S5:OT, S5:OT-A                                   |
| 631 | No          | 9       | 9-B  | 200    | Bozic | Inf | last   | singleC     | S5:OT, S5:OT-A                                                                     |
| 632 | No          | 9       | 9-B  | 200    | Bozic | Inf | last   | wholeT_0.01 | J5:CBN-A, J5:OT, J5:OT-A                                                           |
| 633 | No          | 9       | 9-B  | 200    | Bozic | Inf | last   | wholeT_0.5  | S5:OT, S5:OT-A                                                                     |
| 634 | No          | 9       | 9-B  | 200    | Bozic | Inf | unif   | singleC     | J1:DiP-A, J1:OT, J1:OT-A, S5:DiP, S5:DiP-A, S5:OT, S5:OT-A                         |
| 635 | No          | 9       | 9-B  | 200    | Bozic | Inf | unif   | wholeT_0.01 | J5:OT, J5:OT-A, S5:CBN-A, S5:OT, S5:OT-A                                           |
| 636 | No          | 9       | 9-B  | 200    | Bozic | Inf | unif   | wholeT_0.5  | J1:DiP, J1:DiP-A, J1:OT, J1:OT-A, S5:DiP, S5:DiP-A, S5:OT, S5:OT-A                 |
| 637 | No          | 9       | 9-B  | 200    | exp   | 0   | last   | singleC     | S1:OT, S1:OT-A                                                                     |
| 638 | No          | 9       | 9-B  | 200    | exp   | 0   | last   | wholeT_0.01 | S1:OT, S1:OT-A                                                                     |
| 639 | No          | 9       | 9-B  | 200    | exp   | 0   | last   | wholeT_0.5  | S1:OT, S1:OT-A                                                                     |
| 640 | No          | 9       | 9-B  | 200    | exp   | 0   | unif   | singleC     | S1:DiP, S1:DiP-A, S1:OT, S1:OT-A, S5:DiP, S5:DiP-A, S5:OT, S5:OT-A                 |
| 641 | No          | 9       | 9-B  | 200    | exp   | 0   | unif   | wholeT_0.01 | S1:OT, S1:OT-A                                                                     |
| 642 | No          | 9       | 9-B  | 200    | exp   | 0   | unif   | wholeT_0.5  | S1:DiP, S1:DiP-A, S1:OT, S1:OT-A, S5:DiP, S5:DiP-A, S5:OT, S5:OT-A                 |
| 643 | No          | 9       | 9-B  | 200    | exp   | Inf | last   | singleC     | S5:OT, S5:OT-A                                                                     |
| 644 | No          | 9       | 9-B  | 200    | exp   | Inf | last   | wholeT_0.01 | J5:CBN-A, J5:OT, J5:OT-A                                                           |
| 645 | No          | 9       | 9-B  | 200    | exp   | Inf | last   | wholeT_0.5  | S5:OT, S5:OT-A                                                                     |
| 646 | No          | 9       | 9-B  | 200    | exp   | Inf | unif   | singleC     | J1:DiP, J1:DiP-A, J1:OT, J1:OT-A, S1:OT, S1:OT-A, S5:DiP, S5:DiP-A, S5:OT, S5:OT-A |
| 647 | No          | 9       | 9-B  | 200    | exp   | Inf | unif   | wholeT_0.01 | S5:OT, S5:OT-A                                                                     |
| 648 | No          | 9       | 9-B  | 200    | exp   | Inf | unif   | wholeT_0.5  | S1:OT, S1:OT-A                                                                     |
| 649 | No          | 9       | 9-B  | 200    | McF_4 | 0   | last   | singleC     | S1:OT, S1:OT-A, S5:OT, S5:OT-A                                                     |

Table 13: (continued)

|     | Conjunction | Drivers | Tree | S.Size | Model | sh  | S.Time | S.Type      | Best method(s)                                                                           |
|-----|-------------|---------|------|--------|-------|-----|--------|-------------|------------------------------------------------------------------------------------------|
| 650 | No          | 9       | 9-B  | 200    | McF_4 | 0   | last   | wholeT_0.01 | S5:OT, S5:OT-A                                                                           |
| 651 | No          | 9       | 9-B  | 200    | McF_4 | 0   | last   | wholeT_0.5  | S1:OT, S1:OT-A, S5:OT, S5:OT-A                                                           |
| 652 | No          | 9       | 9-B  | 200    | McF_4 | 0   | unif   | singleC     | S1:OT, S5:OT, S5:OT-A                                                                    |
| 653 | No          | 9       | 9-B  | 200    | McF_4 | 0   | unif   | wholeT_0.01 | S5:OT, S5:OT-A                                                                           |
| 654 | No          | 9       | 9-B  | 200    | McF_4 | 0   | unif   | wholeT_0.5  | S1:OT, S1:OT-A, S5:OT, S5:OT-A                                                           |
| 655 | No          | 9       | 9-B  | 200    | McF_4 | Inf | last   | singleC     | S1:OT, S5:OT, S5:OT-A                                                                    |
| 656 | No          | 9       | 9-B  | 200    | McF_4 | Inf | last   | wholeT_0.01 | S5:OT, S5:OT-A                                                                           |
| 657 | No          | 9       | 9-B  | 200    | McF_4 | Inf | last   | wholeT_0.5  | S1:OT, S1:OT-A, S5:OT, S5:OT-A                                                           |
| 658 | No          | 9       | 9-B  | 200    | McF_4 | Inf | unif   | singleC     | S1:OT, S1:OT-A, S5:OT, S5:OT-A                                                           |
| 659 | No          | 9       | 9-B  | 200    | McF_4 | Inf | unif   | wholeT_0.01 | S5:OT, S5:OT-A                                                                           |
| 660 | No          | 9       | 9-B  | 200    | McF_4 | Inf | unif   | wholeT_0.5  | S1:OT, S1:OT-A, S5:OT, S5:OT-A                                                           |
| 661 | No          | 9       | 9-B  | 200    | McF_6 | 0   | last   | singleC     | S5:OT, S5:OT-A                                                                           |
| 662 | No          | 9       | 9-B  | 200    | McF_6 | 0   | last   | wholeT_0.01 | J1:OT, S5:OT, S5:OT-A                                                                    |
| 663 | No          | 9       | 9-B  | 200    | McF_6 | 0   | last   | wholeT_0.5  | S5:OT, S5:OT-A                                                                           |
| 664 | No          | 9       | 9-B  | 200    | McF_6 | 0   | unif   | singleC     | S5:CBN, S5:OT, S5:OT-A                                                                   |
| 665 | No          | 9       | 9-B  | 200    | McF_6 | 0   | unif   | wholeT_0.01 | S5:CBN-A, S5:OT, S5:OT-A                                                                 |
| 666 | No          | 9       | 9-B  | 200    | McF_6 | 0   | unif   | wholeT_0.5  | S1:OT-A, S5:CBN-A, S5:OT, S5:OT-A                                                        |
| 667 | No          | 9       | 9-B  | 200    | McF_6 | Inf | last   | singleC     | S5:OT-A                                                                                  |
| 668 | No          | 9       | 9-B  | 200    | McF_6 | Inf | last   | wholeT_0.01 | S5:OT-A                                                                                  |
| 669 | No          | 9       | 9-B  | 200    | McF_6 | Inf | last   | wholeT_0.5  | S5:OT-A                                                                                  |
| 670 | No          | 9       | 9-B  | 200    | McF_6 | Inf | unif   | singleC     | S5:CBN, S5:OT, S5:OT-A                                                                   |
| 671 | No          | 9       | 9-B  | 200    | McF_6 | Inf | unif   | wholeT_0.01 | S5:CBN-A, S5:OT, S5:OT-A                                                                 |
| 672 | No          | 9       | 9-B  | 200    | McF_6 | Inf | unif   | wholeT_0.5  | S1:OT, S1:OT-A, S5:CBN, S5:CBN-A,<br>S5:OT, S5:OT-A                                      |
| 673 | No          | 9       | 9-B  | 100    | Bozic | 0   | last   | singleC     | S1:OT, S1:OT-A, S5:OT, S5:OT-A                                                           |
| 674 | No          | 9       | 9-B  | 100    | Bozic | 0   | last   | wholeT_0.01 | S5:OT, S5:OT-A                                                                           |
| 675 | No          | 9       | 9-B  | 100    | Bozic | 0   | last   | wholeT_0.5  | J1:DiP, J1:DiP-A, J1:OT, J1:OT-A,<br>S1:OT, S1:OT-A, S5:DiP, S5:DiP-A,<br>S5:OT, S5:OT-A |
| 676 | No          | 9       | 9-B  | 100    | Bozic | 0   | unif   | singleC     | S5:DiP, S5:DiP-A, S5:OT, S5:OT-A                                                         |
| 677 | No          | 9       | 9-B  | 100    | Bozic | 0   | unif   | wholeT_0.01 | J1:OT, J1:OT-A, S5:DiP, S5:DiP-A,<br>S5:OT, S5:OT-A                                      |
| 678 | No          | 9       | 9-B  | 100    | Bozic | 0   | unif   | wholeT_0.5  | S5:DiP, S5:DiP-A, S5:OT, S5:OT-A                                                         |
| 679 | No          | 9       | 9-B  | 100    | Bozic | Inf | last   | singleC     | J1:OT, J1:OT-A, J5:OT, J5:OT-A,<br>S5:OT, S5:OT-A                                        |
| 680 | No          | 9       | 9-B  | 100    | Bozic | Inf | last   | wholeT_0.01 | J5:OT, J5:OT-A                                                                           |
| 681 | No          | 9       | 9-B  | 100    | Bozic | Inf | last   | wholeT_0.5  | J1:OT, J1:OT-A, J5:OT, J5:OT-A,<br>S5:OT, S5:OT-A                                        |
| 682 | No          | 9       | 9-B  | 100    | Bozic | Inf | unif   | singleC     | S5:DiP, S5:DiP-A, S5:OT, S5:OT-A                                                         |
| 683 | No          | 9       | 9-B  | 100    | Bozic | Inf | unif   | wholeT_0.01 | J5:OT, J5:OT-A                                                                           |

Table 13: (continued)

|     | Conjunction | Drivers | Tree | S.Size | Model | sh  | S.Time | S.Type      | Best method(s)                                                     |
|-----|-------------|---------|------|--------|-------|-----|--------|-------------|--------------------------------------------------------------------|
| 684 | No          | 9       | 9-B  | 100    | Bozic | Inf | unif   | wholeT_0.5  | J1:OT, J1:OT-A, S5:DiP-A, S5:OT, S5:OT-A                           |
| 685 | No          | 9       | 9-B  | 100    | exp   | 0   | last   | singleC     | S1:OT, S1:OT-A                                                     |
| 686 | No          | 9       | 9-B  | 100    | exp   | 0   | last   | wholeT_0.01 | S1:OT, S1:OT-A, S5:OT, S5:OT-A                                     |
| 687 | No          | 9       | 9-B  | 100    | exp   | 0   | last   | wholeT_0.5  | S1:OT, S1:OT-A, S5:OT                                              |
| 688 | No          | 9       | 9-B  | 100    | exp   | 0   | unif   | singleC     | S1:DiP, S1:DiP-A, S1:OT, S1:OT-A, S5:DiP, S5:DiP-A, S5:OT, S5:OT-A |
| 689 | No          | 9       | 9-B  | 100    | exp   | 0   | unif   | wholeT_0.01 | J1:OT, J1:OT-A, S1:OT, S1:OT-A, S5:DiP, S5:DiP-A, S5:OT, S5:OT-A   |
| 690 | No          | 9       | 9-B  | 100    | exp   | 0   | unif   | wholeT_0.5  | S1:OT, S1:OT-A, S5:DiP, S5:DiP-A, S5:OT, S5:OT-A                   |
| 691 | No          | 9       | 9-B  | 100    | exp   | Inf | last   | singleC     | S5:OT, S5:OT-A                                                     |
| 692 | No          | 9       | 9-B  | 100    | exp   | Inf | last   | wholeT_0.01 | J5:OT, J5:OT-A                                                     |
| 693 | No          | 9       | 9-B  | 100    | exp   | Inf | last   | wholeT_0.5  | S5:OT, S5:OT-A                                                     |
| 694 | No          | 9       | 9-B  | 100    | exp   | Inf | unif   | singleC     | J1:DiP, J1:DiP-A, J1:OT, J1:OT-A, S5:DiP, S5:DiP-A, S5:OT, S5:OT-A |
| 695 | No          | 9       | 9-B  | 100    | exp   | Inf | unif   | wholeT_0.01 | S5:OT, S5:OT-A                                                     |
| 696 | No          | 9       | 9-B  | 100    | exp   | Inf | unif   | wholeT_0.5  | J1:OT, S5:DiP, S5:DiP-A, S5:OT, S5:OT-A                            |
| 697 | No          | 9       | 9-B  | 100    | McF_4 | 0   | last   | singleC     | S5:OT, S5:OT-A                                                     |
| 698 | No          | 9       | 9-B  | 100    | McF_4 | 0   | last   | wholeT_0.01 | S5:OT, S5:OT-A                                                     |
| 699 | No          | 9       | 9-B  | 100    | McF_4 | 0   | last   | wholeT_0.5  | S5:OT, S5:OT-A                                                     |
| 700 | No          | 9       | 9-B  | 100    | McF_4 | 0   | unif   | singleC     | S5:OT, S5:OT-A                                                     |
| 701 | No          | 9       | 9-B  | 100    | McF_4 | 0   | unif   | wholeT_0.01 | S5:OT, S5:OT-A                                                     |
| 702 | No          | 9       | 9-B  | 100    | McF_4 | 0   | unif   | wholeT_0.5  | S5:OT, S5:OT-A                                                     |
| 703 | No          | 9       | 9-B  | 100    | McF_4 | Inf | last   | singleC     | S5:OT, S5:OT-A                                                     |
| 704 | No          | 9       | 9-B  | 100    | McF_4 | Inf | last   | wholeT_0.01 | S5:OT, S5:OT-A                                                     |
| 705 | No          | 9       | 9-B  | 100    | McF_4 | Inf | last   | wholeT_0.5  | S5:OT, S5:OT-A                                                     |
| 706 | No          | 9       | 9-B  | 100    | McF_4 | Inf | unif   | singleC     | S5:OT, S5:OT-A                                                     |
| 707 | No          | 9       | 9-B  | 100    | McF_4 | Inf | unif   | wholeT_0.01 | S5:OT, S5:OT-A                                                     |
| 708 | No          | 9       | 9-B  | 100    | McF_4 | Inf | unif   | wholeT_0.5  | S5:OT, S5:OT-A                                                     |
| 709 | No          | 9       | 9-B  | 100    | McF_6 | 0   | last   | singleC     | S5:OT, S5:OT-A                                                     |
| 710 | No          | 9       | 9-B  | 100    | McF_6 | 0   | last   | wholeT_0.01 | S5:OT, S5:OT-A                                                     |
| 711 | No          | 9       | 9-B  | 100    | McF_6 | 0   | last   | wholeT_0.5  | S5:OT, S5:OT-A                                                     |
| 712 | No          | 9       | 9-B  | 100    | McF_6 | 0   | unif   | singleC     | S5:CBN-A, S5:OT, S5:OT-A                                           |
| 713 | No          | 9       | 9-B  | 100    | McF_6 | 0   | unif   | wholeT_0.01 | S5:CBN, S5:OT, S5:OT-A                                             |
| 714 | No          | 9       | 9-B  | 100    | McF_6 | 0   | unif   | wholeT_0.5  | S5:CBN, S5:CBN-A, S5:OT, S5:OT-A                                   |
| 715 | No          | 9       | 9-B  | 100    | McF_6 | Inf | last   | singleC     | S5:OT-A                                                            |
| 716 | No          | 9       | 9-B  | 100    | McF_6 | Inf | last   | wholeT_0.01 | S5:OT-A                                                            |
| 717 | No          | 9       | 9-B  | 100    | McF_6 | Inf | last   | wholeT_0.5  | S5:OT-A                                                            |

Table 13: (continued)

|     | Conjunction | Drivers | Tree | S.Size | Model | sh  | S.Time | S.Type      | Best method(s)                                                                                                                     |
|-----|-------------|---------|------|--------|-------|-----|--------|-------------|------------------------------------------------------------------------------------------------------------------------------------|
| 718 | No          | 9       | 9-B  | 100    | McF_6 | Inf | unif   | singleC     | S5:OT, S5:OT-A                                                                                                                     |
| 719 | No          | 9       | 9-B  | 100    | McF_6 | Inf | unif   | wholeT_0.01 | S5:CBN, S5:CBN-A, S5:OT, S5:OT-A                                                                                                   |
| 720 | No          | 9       | 9-B  | 100    | McF_6 | Inf | unif   | wholeT_0.5  | S5:CBN, S5:CBN-A, S5:OT, S5:OT-A                                                                                                   |
| 721 | No          | 7       | 7-B  | 1000   | Bozic | 0   | last   | singleC     | S1:OT-A, S5:OT-A                                                                                                                   |
| 722 | No          | 7       | 7-B  | 1000   | Bozic | 0   | last   | wholeT_0.01 | J1:DiP-A, J1:OT-A, J5:DiP-A, J5:OT-A,<br>S1:OT-A, S5:DiP-A                                                                         |
| 723 | No          | 7       | 7-B  | 1000   | Bozic | 0   | last   | wholeT_0.5  | S1:OT-A                                                                                                                            |
| 724 | No          | 7       | 7-B  | 1000   | Bozic | 0   | unif   | singleC     | S1:CBN-A, S1:OT, S1:OT-A                                                                                                           |
| 725 | No          | 7       | 7-B  | 1000   | Bozic | 0   | unif   | wholeT_0.01 | J5:CBN, J5:CBN-A, J5:DiP-A, J5:OT,<br>J5:OT-A                                                                                      |
| 726 | No          | 7       | 7-B  | 1000   | Bozic | 0   | unif   | wholeT_0.5  | J1:CBN, J1:CBN-A, J1:DiP, J1:DiP-<br>A, J1:OT, J1:OT-A, J5:DiP, J5:DiP-A,<br>S1:CBN, S1:CBN-A, S1:OT, S1:OT-A,<br>S5:DiP, S5:DiP-A |
| 727 | No          | 7       | 7-B  | 1000   | Bozic | Inf | last   | singleC     | J1:DiP-A, J1:OT-A, J5:DiP-A, J5:OT-A,<br>S5:DiP-A, S5:OT-A                                                                         |
| 728 | No          | 7       | 7-B  | 1000   | Bozic | Inf | last   | wholeT_0.01 | J5:CBN-A, J5:DiP-A, J5:OT-A                                                                                                        |
| 729 | No          | 7       | 7-B  | 1000   | Bozic | Inf | last   | wholeT_0.5  | J1:DiP-A, J1:OT-A, S5:DiP-A, S5:OT-A                                                                                               |
| 730 | No          | 7       | 7-B  | 1000   | Bozic | Inf | unif   | singleC     | S1:CBN, S1:CBN-A, S5:CBN                                                                                                           |
| 731 | No          | 7       | 7-B  | 1000   | Bozic | Inf | unif   | wholeT_0.01 | J1:OT, J1:OT-A, J5:CBN, J5:CBN-A,<br>J5:DiP-A, J5:OT, J5:OT-A, S5:CBN,<br>S5:CBN-A, S5:DiP-A, S5:OT, S5:OT-A                       |
| 732 | No          | 7       | 7-B  | 1000   | Bozic | Inf | unif   | wholeT_0.5  | S1:CBN, S1:CBN-A                                                                                                                   |
| 733 | No          | 7       | 7-B  | 1000   | exp   | 0   | last   | singleC     | S1:OT-A                                                                                                                            |
| 734 | No          | 7       | 7-B  | 1000   | exp   | 0   | last   | wholeT_0.01 | J1:OT-A, S1:OT-A, S5:OT-A                                                                                                          |
| 735 | No          | 7       | 7-B  | 1000   | exp   | 0   | last   | wholeT_0.5  | S1:OT-A                                                                                                                            |
| 736 | No          | 7       | 7-B  | 1000   | exp   | 0   | unif   | singleC     | J1:DiP, J1:DiP-A, J5:DiP, J5:DiP-A,<br>S1:DiP, S1:DiP-A, S5:DiP, S5:DiP-A                                                          |
| 737 | No          | 7       | 7-B  | 1000   | exp   | 0   | unif   | wholeT_0.01 | J1:CBN, J1:CBN-A, J1:OT, J1:OT-A,<br>S1:CBN-A                                                                                      |
| 738 | No          | 7       | 7-B  | 1000   | exp   | 0   | unif   | wholeT_0.5  | J1:DiP, J1:DiP-A, J5:DiP, J5:DiP-A,<br>S1:DiP, S1:DiP-A, S5:DiP, S5:DiP-A                                                          |
| 739 | No          | 7       | 7-B  | 1000   | exp   | Inf | last   | singleC     | J1:OT-A, S1:OT-A, S5:OT-A                                                                                                          |
| 740 | No          | 7       | 7-B  | 1000   | exp   | Inf | last   | wholeT_0.01 | S5:OT-A                                                                                                                            |
| 741 | No          | 7       | 7-B  | 1000   | exp   | Inf | last   | wholeT_0.5  | S1:OT-A, S5:OT-A                                                                                                                   |
| 742 | No          | 7       | 7-B  | 1000   | exp   | Inf | unif   | singleC     | S1:CBN, S1:CBN-A                                                                                                                   |
| 743 | No          | 7       | 7-B  | 1000   | exp   | Inf | unif   | wholeT_0.01 | J1:CBN, J1:CBN-A, J1:OT, J1:OT-A,<br>J5:CBN, J5:CBN-A, J5:OT, J5:OT-A,<br>S5:CBN, S5:CBN-A, S5:OT, S5:OT-A                         |
| 744 | No          | 7       | 7-B  | 1000   | exp   | Inf | unif   | wholeT_0.5  | S1:CBN, S1:CBN-A, S1:OT, S1:OT-A                                                                                                   |

Table 13: (continued)

|     | Conjunction | Drivers | Tree | S.Size | Model | sh  | S.Time | S.Type      | Best method(s)                                                     |
|-----|-------------|---------|------|--------|-------|-----|--------|-------------|--------------------------------------------------------------------|
| 745 | No          | 7       | 7-B  | 1000   | McF_4 | 0   | last   | singleC     | S1:DiP-A, S1:OT-A, S5:DiP-A, S5:OT-A                               |
| 746 | No          | 7       | 7-B  | 1000   | McF_4 | 0   | last   | wholeT_0.01 | S5:DiP-A, S5:OT-A                                                  |
| 747 | No          | 7       | 7-B  | 1000   | McF_4 | 0   | last   | wholeT_0.5  | S1:DiP-A, S1:OT-A, S5:DiP-A, S5:OT-A                               |
| 748 | No          | 7       | 7-B  | 1000   | McF_4 | 0   | unif   | singleC     | S1:DiP-A, S1:OT, S1:OT-A                                           |
| 749 | No          | 7       | 7-B  | 1000   | McF_4 | 0   | unif   | wholeT_0.01 | J1:DiP-A, J1:OT, J1:OT-A, S5:DiP-A, S5:OT, S5:OT-A                 |
| 750 | No          | 7       | 7-B  | 1000   | McF_4 | 0   | unif   | wholeT_0.5  | S1:DiP-A, S1:OT, S1:OT-A                                           |
| 751 | No          | 7       | 7-B  | 1000   | McF_4 | Inf | last   | singleC     | S1:DiP-A, S1:OT-A, S5:DiP-A, S5:OT-A                               |
| 752 | No          | 7       | 7-B  | 1000   | McF_4 | Inf | last   | wholeT_0.01 | S5:DiP-A, S5:OT-A                                                  |
| 753 | No          | 7       | 7-B  | 1000   | McF_4 | Inf | last   | wholeT_0.5  | S1:DiP-A, S1:OT-A, S5:DiP-A, S5:OT-A                               |
| 754 | No          | 7       | 7-B  | 1000   | McF_4 | Inf | unif   | singleC     | S1:OT, S1:OT-A                                                     |
| 755 | No          | 7       | 7-B  | 1000   | McF_4 | Inf | unif   | wholeT_0.01 | J1:OT, J1:OT-A, S5:OT, S5:OT-A                                     |
| 756 | No          | 7       | 7-B  | 1000   | McF_4 | Inf | unif   | wholeT_0.5  | S1:OT, S1:OT-A                                                     |
| 757 | No          | 7       | 7-B  | 1000   | McF_6 | 0   | last   | singleC     | J1:DiP-A, J1:OT-A, S5:DiP-A, S5:OT-A                               |
| 758 | No          | 7       | 7-B  | 1000   | McF_6 | 0   | last   | wholeT_0.01 | J5:DiP-A, J5:OT-A, S5:DiP-A, S5:OT-A                               |
| 759 | No          | 7       | 7-B  | 1000   | McF_6 | 0   | last   | wholeT_0.5  | J1:DiP-A, J1:OT-A, S1:OT-A, S5:DiP-A, S5:OT-A                      |
| 760 | No          | 7       | 7-B  | 1000   | McF_6 | 0   | unif   | singleC     | S1:DiP, S1:DiP-A, S1:OT, S1:OT-A, S5:DiP, S5:DiP-A, S5:OT, S5:OT-A |
| 761 | No          | 7       | 7-B  | 1000   | McF_6 | 0   | unif   | wholeT_0.01 | S5:DiP, S5:DiP-A, S5:OT, S5:OT-A                                   |
| 762 | No          | 7       | 7-B  | 1000   | McF_6 | 0   | unif   | wholeT_0.5  | S1:DiP, S1:DiP-A, S1:OT, S1:OT-A, S5:DiP, S5:DiP-A, S5:OT, S5:OT-A |
| 763 | No          | 7       | 7-B  | 1000   | McF_6 | Inf | last   | singleC     | J1:DiP-A, J1:OT-A, S5:DiP-A, S5:OT-A                               |
| 764 | No          | 7       | 7-B  | 1000   | McF_6 | Inf | last   | wholeT_0.01 | J5:DiP-A, J5:OT-A, S5:DiP-A, S5:OT-A                               |
| 765 | No          | 7       | 7-B  | 1000   | McF_6 | Inf | last   | wholeT_0.5  | J1:DiP-A, J1:OT-A, S1:OT-A, S5:DiP-A, S5:OT-A                      |
| 766 | No          | 7       | 7-B  | 1000   | McF_6 | Inf | unif   | singleC     | S1:DiP-A, S1:OT, S1:OT-A, S5:DiP-A, S5:OT, S5:OT-A                 |
| 767 | No          | 7       | 7-B  | 1000   | McF_6 | Inf | unif   | wholeT_0.01 | S5:DiP-A, S5:OT, S5:OT-A                                           |
| 768 | No          | 7       | 7-B  | 1000   | McF_6 | Inf | unif   | wholeT_0.5  | S1:DiP-A, S1:OT, S1:OT-A, S5:DiP-A, S5:OT, S5:OT-A                 |
| 769 | No          | 7       | 7-B  | 200    | Bozic | 0   | last   | singleC     | S1:OT-A, S5:OT-A                                                   |
| 770 | No          | 7       | 7-B  | 200    | Bozic | 0   | last   | wholeT_0.01 | J1:OT-A, J5:OT-A, S5:OT-A                                          |
| 771 | No          | 7       | 7-B  | 200    | Bozic | 0   | last   | wholeT_0.5  | S1:OT-A                                                            |
| 772 | No          | 7       | 7-B  | 200    | Bozic | 0   | unif   | singleC     | J1:CBN, J1:CBN-A, J1:OT, J1:OT-A, S1:OT, S1:OT-A                   |
| 773 | No          | 7       | 7-B  | 200    | Bozic | 0   | unif   | wholeT_0.01 | J5:CBN, J5:CBN-A, J5:OT, J5:OT-A                                   |
| 774 | No          | 7       | 7-B  | 200    | Bozic | 0   | unif   | wholeT_0.5  | J1:CBN, J1:CBN-A, J1:OT, J1:OT-A, S1:CBN-A, S1:OT, S1:OT-A         |
| 775 | No          | 7       | 7-B  | 200    | Bozic | Inf | last   | singleC     | S5:OT-A                                                            |

Table 13: (continued)

|     | Conjunction | Drivers | Tree | S.Size | Model | sh  | S.Time | S.Type      | Best method(s)                                                                                                                   |
|-----|-------------|---------|------|--------|-------|-----|--------|-------------|----------------------------------------------------------------------------------------------------------------------------------|
| 776 | No          | 7       | 7-B  | 200    | Bozic | Inf | last   | wholeT_0.01 | J5:CBN-A, J5:OT-A                                                                                                                |
| 777 | No          | 7       | 7-B  | 200    | Bozic | Inf | last   | wholeT_0.5  | S5:OT-A                                                                                                                          |
| 778 | No          | 7       | 7-B  | 200    | Bozic | Inf | unif   | singleC     | J1:CBN, J1:CBN-A, S5:CBN, S5:CBN-A, S5:OT, S5:OT-A                                                                               |
| 779 | No          | 7       | 7-B  | 200    | Bozic | Inf | unif   | wholeT_0.01 | J5:CBN-A, J5:OT, J5:OT-A, S5:CBN, S5:CBN-A, S5:OT, S5:OT-A                                                                       |
| 780 | No          | 7       | 7-B  | 200    | Bozic | Inf | unif   | wholeT_0.5  | J1:CBN, J1:CBN-A                                                                                                                 |
| 781 | No          | 7       | 7-B  | 200    | exp   | 0   | last   | singleC     | S1:OT-A                                                                                                                          |
| 782 | No          | 7       | 7-B  | 200    | exp   | 0   | last   | wholeT_0.01 | J1:OT-A, S1:OT-A, S5:OT-A                                                                                                        |
| 783 | No          | 7       | 7-B  | 200    | exp   | 0   | last   | wholeT_0.5  | S1:OT-A                                                                                                                          |
| 784 | No          | 7       | 7-B  | 200    | exp   | 0   | unif   | singleC     | J1:CBN, J1:CBN-A, J1:OT, J5:DiP, J5:DiP-A, S1:CBN, S1:CBN-A, S1:OT, S1:OT-A, S5:DiP, S5:DiP-A                                    |
| 785 | No          | 7       | 7-B  | 200    | exp   | 0   | unif   | wholeT_0.01 | J1:CBN, J1:CBN-A, J1:OT, J1:OT-A, S1:CBN-A, S1:OT, S1:OT-A                                                                       |
| 786 | No          | 7       | 7-B  | 200    | exp   | 0   | unif   | wholeT_0.5  | J1:CBN, J1:CBN-A, J1:DiP, J1:OT, J1:OT-A, J5:DiP, J5:DiP-A, S1:CBN, S1:CBN-A, S1:DiP, S1:DiP-A, S1:OT, S1:OT-A, S5:DiP, S5:DiP-A |
| 787 | No          | 7       | 7-B  | 200    | exp   | Inf | last   | singleC     | J1:OT-A, S5:OT-A                                                                                                                 |
| 788 | No          | 7       | 7-B  | 200    | exp   | Inf | last   | wholeT_0.01 | J5:OT-A, S5:OT-A                                                                                                                 |
| 789 | No          | 7       | 7-B  | 200    | exp   | Inf | last   | wholeT_0.5  | S5:OT-A                                                                                                                          |
| 790 | No          | 7       | 7-B  | 200    | exp   | Inf | unif   | singleC     | J1:CBN, J1:CBN-A, J1:OT, J1:OT-A, S1:CBN, S1:CBN-A, S1:OT, S1:OT-A                                                               |
| 791 | No          | 7       | 7-B  | 200    | exp   | Inf | unif   | wholeT_0.01 | J5:CBN, J5:OT, J5:OT-A, S5:OT, S5:OT-A                                                                                           |
| 792 | No          | 7       | 7-B  | 200    | exp   | Inf | unif   | wholeT_0.5  | S1:CBN, S1:CBN-A, S1:OT, S1:OT-A                                                                                                 |
| 793 | No          | 7       | 7-B  | 200    | McF_4 | 0   | last   | singleC     | S5:OT-A                                                                                                                          |
| 794 | No          | 7       | 7-B  | 200    | McF_4 | 0   | last   | wholeT_0.01 | S5:OT-A                                                                                                                          |
| 795 | No          | 7       | 7-B  | 200    | McF_4 | 0   | last   | wholeT_0.5  | S5:OT-A                                                                                                                          |
| 796 | No          | 7       | 7-B  | 200    | McF_4 | 0   | unif   | singleC     | J1:OT, J1:OT-A, S5:OT, S5:OT-A                                                                                                   |
| 797 | No          | 7       | 7-B  | 200    | McF_4 | 0   | unif   | wholeT_0.01 | J1:OT, J1:OT-A, S5:OT, S5:OT-A                                                                                                   |
| 798 | No          | 7       | 7-B  | 200    | McF_4 | 0   | unif   | wholeT_0.5  | J1:OT, J1:OT-A, S1:OT, S1:OT-A, S5:OT, S5:OT-A                                                                                   |
| 799 | No          | 7       | 7-B  | 200    | McF_4 | Inf | last   | singleC     | S5:OT-A                                                                                                                          |
| 800 | No          | 7       | 7-B  | 200    | McF_4 | Inf | last   | wholeT_0.01 | S5:OT-A                                                                                                                          |
| 801 | No          | 7       | 7-B  | 200    | McF_4 | Inf | last   | wholeT_0.5  | S5:OT-A                                                                                                                          |
| 802 | No          | 7       | 7-B  | 200    | McF_4 | Inf | unif   | singleC     | J1:OT, J1:OT-A, S5:OT, S5:OT-A                                                                                                   |
| 803 | No          | 7       | 7-B  | 200    | McF_4 | Inf | unif   | wholeT_0.01 | J1:OT, J1:OT-A, S5:OT, S5:OT-A                                                                                                   |



Table 13: (continued)

|     | Conjunction | Drivers | Tree | S.Size | Model | sh  | S.Time | S.Type      | Best method(s)                                                                                         |
|-----|-------------|---------|------|--------|-------|-----|--------|-------------|--------------------------------------------------------------------------------------------------------|
| 804 | No          | 7       | 7-B  | 200    | McF_4 | Inf | unif   | wholeT_0.5  | J1:OT, J1:OT-A, S1:OT, S1:OT-A, S5:OT, S5:OT-A                                                         |
| 805 | No          | 7       | 7-B  | 200    | McF_6 | 0   | last   | singleC     | J1:OT-A, J5:OT-A, S5:OT-A                                                                              |
| 806 | No          | 7       | 7-B  | 200    | McF_6 | 0   | last   | wholeT_0.01 | J5:OT-A, S5:OT-A                                                                                       |
| 807 | No          | 7       | 7-B  | 200    | McF_6 | 0   | last   | wholeT_0.5  | J1:OT-A, S5:OT-A                                                                                       |
| 808 | No          | 7       | 7-B  | 200    | McF_6 | 0   | unif   | singleC     | S5:OT, S5:OT-A                                                                                         |
| 809 | No          | 7       | 7-B  | 200    | McF_6 | 0   | unif   | wholeT_0.01 | S5:OT, S5:OT-A                                                                                         |
| 810 | No          | 7       | 7-B  | 200    | McF_6 | 0   | unif   | wholeT_0.5  | S5:CBN-A, S5:OT, S5:OT-A                                                                               |
| 811 | No          | 7       | 7-B  | 200    | McF_6 | Inf | last   | singleC     | J1:OT-A, J5:OT-A, S5:OT-A                                                                              |
| 812 | No          | 7       | 7-B  | 200    | McF_6 | Inf | last   | wholeT_0.01 | J5:OT-A, S5:OT-A                                                                                       |
| 813 | No          | 7       | 7-B  | 200    | McF_6 | Inf | last   | wholeT_0.5  | J1:OT-A, S5:OT-A                                                                                       |
| 814 | No          | 7       | 7-B  | 200    | McF_6 | Inf | unif   | singleC     | S5:CBN-A, S5:OT, S5:OT-A                                                                               |
| 815 | No          | 7       | 7-B  | 200    | McF_6 | Inf | unif   | wholeT_0.01 | J1:OT-A, S5:CBN-A, S5:OT, S5:OT-A                                                                      |
| 816 | No          | 7       | 7-B  | 200    | McF_6 | Inf | unif   | wholeT_0.5  | J1:CBN-A, J1:OT, J1:OT-A, J5:CBN-A, S5:CBN-A, S5:OT, S5:OT-A                                           |
| 817 | No          | 7       | 7-B  | 100    | Bozic | 0   | last   | singleC     | S5:OT-A                                                                                                |
| 818 | No          | 7       | 7-B  | 100    | Bozic | 0   | last   | wholeT_0.01 | J1:OT-A, J5:OT-A, S5:OT-A                                                                              |
| 819 | No          | 7       | 7-B  | 100    | Bozic | 0   | last   | wholeT_0.5  | S1:OT-A, S5:OT-A                                                                                       |
| 820 | No          | 7       | 7-B  | 100    | Bozic | 0   | unif   | singleC     | J1:CBN, J1:CBN-A, J1:OT, J1:OT-A, S1:OT, S1:OT-A                                                       |
| 821 | No          | 7       | 7-B  | 100    | Bozic | 0   | unif   | wholeT_0.01 | J5:CBN, J5:CBN-A, J5:OT, J5:OT-A                                                                       |
| 822 | No          | 7       | 7-B  | 100    | Bozic | 0   | unif   | wholeT_0.5  | J1:CBN, J1:CBN-A, J1:OT, J1:OT-A, J5:DiP, J5:DiP-A, S1:OT, S1:OT-A, S5:DiP, S5:DiP-A                   |
| 823 | No          | 7       | 7-B  | 100    | Bozic | Inf | last   | singleC     | J1:OT-A, S5:OT-A                                                                                       |
| 824 | No          | 7       | 7-B  | 100    | Bozic | Inf | last   | wholeT_0.01 | J5:CBN-A, J5:OT-A                                                                                      |
| 825 | No          | 7       | 7-B  | 100    | Bozic | Inf | last   | wholeT_0.5  | S5:OT-A                                                                                                |
| 826 | No          | 7       | 7-B  | 100    | Bozic | Inf | unif   | singleC     | S5:CBN, S5:CBN-A                                                                                       |
| 827 | No          | 7       | 7-B  | 100    | Bozic | Inf | unif   | wholeT_0.01 | J5:CBN, J5:CBN-A, J5:OT, J5:OT-A                                                                       |
| 828 | No          | 7       | 7-B  | 100    | Bozic | Inf | unif   | wholeT_0.5  | J1:CBN, J1:CBN-A, S5:CBN, S5:CBN-A, S5:OT, S5:OT-A                                                     |
| 829 | No          | 7       | 7-B  | 100    | exp   | 0   | last   | singleC     | S1:OT-A                                                                                                |
| 830 | No          | 7       | 7-B  | 100    | exp   | 0   | last   | wholeT_0.01 | J1:CBN-A, J1:OT-A, J5:CBN-A, J5:OT-A, S1:OT-A, S5:OT-A                                                 |
| 831 | No          | 7       | 7-B  | 100    | exp   | 0   | last   | wholeT_0.5  | S1:OT-A                                                                                                |
| 832 | No          | 7       | 7-B  | 100    | exp   | 0   | unif   | singleC     | J1:CBN, J1:CBN-A, J1:OT, J1:OT-A, J5:DiP, J5:DiP-A, S1:CBN, S1:CBN-A, S1:OT, S1:OT-A, S5:DiP, S5:DiP-A |

Table 13: (continued)

|     | Conjunction | Drivers | Tree | S.Size | Model | sh  | S.Time | S.Type      | Best method(s)                                                                                         |
|-----|-------------|---------|------|--------|-------|-----|--------|-------------|--------------------------------------------------------------------------------------------------------|
| 833 | No          | 7       | 7-B  | 100    | exp   | 0   | unif   | wholeT_0.01 | J1:CBN, J1:CBN-A, J1:OT, J1:OT-A, J5:DiP, J5:DiP-A, S1:OT, S1:OT-A, S5:CBN, S5:CBN-A, S5:DiP, S5:DiP-A |
| 834 | No          | 7       | 7-B  | 100    | exp   | 0   | unif   | wholeT_0.5  | J1:CBN, J1:CBN-A, J1:OT, J1:OT-A, J5:DiP, J5:DiP-A, S1:CBN, S1:CBN-A, S1:OT, S1:OT-A, S5:DiP, S5:DiP-A |
| 835 | No          | 7       | 7-B  | 100    | exp   | Inf | last   | singleC     | S5:OT-A                                                                                                |
| 836 | No          | 7       | 7-B  | 100    | exp   | Inf | last   | wholeT_0.01 | J5:OT-A                                                                                                |
| 837 | No          | 7       | 7-B  | 100    | exp   | Inf | last   | wholeT_0.5  | S5:OT-A                                                                                                |
| 838 | No          | 7       | 7-B  | 100    | exp   | Inf | unif   | singleC     | J1:CBN, J1:CBN-A, J1:OT, J1:OT-A, J5:CBN, J5:OT-A, S1:OT, S1:OT-A, S5:CBN, S5:CBN-A, S5:OT, S5:OT-A    |
| 839 | No          | 7       | 7-B  | 100    | exp   | Inf | unif   | wholeT_0.01 | J5:CBN, J5:CBN-A, J5:OT, J5:OT-A, S5:OT, S5:OT-A                                                       |
| 840 | No          | 7       | 7-B  | 100    | exp   | Inf | unif   | wholeT_0.5  | J1:CBN, J1:CBN-A, S1:CBN-A, S1:OT, S1:OT-A                                                             |
| 841 | No          | 7       | 7-B  | 100    | McF_4 | 0   | last   | singleC     | S5:OT-A                                                                                                |
| 842 | No          | 7       | 7-B  | 100    | McF_4 | 0   | last   | wholeT_0.01 | S5:OT-A                                                                                                |
| 843 | No          | 7       | 7-B  | 100    | McF_4 | 0   | last   | wholeT_0.5  | S5:OT-A                                                                                                |
| 844 | No          | 7       | 7-B  | 100    | McF_4 | 0   | unif   | singleC     | J1:OT, J1:OT-A, S5:OT, S5:OT-A                                                                         |
| 845 | No          | 7       | 7-B  | 100    | McF_4 | 0   | unif   | wholeT_0.01 | J1:OT-A, S5:OT, S5:OT-A                                                                                |
| 846 | No          | 7       | 7-B  | 100    | McF_4 | 0   | unif   | wholeT_0.5  | J1:OT, J1:OT-A, S5:OT, S5:OT-A                                                                         |
| 847 | No          | 7       | 7-B  | 100    | McF_4 | Inf | last   | singleC     | S5:OT-A                                                                                                |
| 848 | No          | 7       | 7-B  | 100    | McF_4 | Inf | last   | wholeT_0.01 | S5:OT-A                                                                                                |
| 849 | No          | 7       | 7-B  | 100    | McF_4 | Inf | last   | wholeT_0.5  | S5:OT-A                                                                                                |
| 850 | No          | 7       | 7-B  | 100    | McF_4 | Inf | unif   | singleC     | J1:OT, J1:OT-A, S5:OT, S5:OT-A                                                                         |
| 851 | No          | 7       | 7-B  | 100    | McF_4 | Inf | unif   | wholeT_0.01 | J1:OT-A, S5:OT, S5:OT-A                                                                                |
| 852 | No          | 7       | 7-B  | 100    | McF_4 | Inf | unif   | wholeT_0.5  | J1:OT, J1:OT-A, J5:CBN-A, S5:OT, S5:OT-A                                                               |
| 853 | No          | 7       | 7-B  | 100    | McF_6 | 0   | last   | singleC     | J5:OT-A, S5:OT-A                                                                                       |
| 854 | No          | 7       | 7-B  | 100    | McF_6 | 0   | last   | wholeT_0.01 | J5:OT-A, S5:OT-A                                                                                       |
| 855 | No          | 7       | 7-B  | 100    | McF_6 | 0   | last   | wholeT_0.5  | S5:OT-A                                                                                                |
| 856 | No          | 7       | 7-B  | 100    | McF_6 | 0   | unif   | singleC     | J1:CBN-A, S5:CBN-A, S5:OT, S5:OT-A                                                                     |
| 857 | No          | 7       | 7-B  | 100    | McF_6 | 0   | unif   | wholeT_0.01 | S5:CBN-A, S5:OT, S5:OT-A                                                                               |
| 858 | No          | 7       | 7-B  | 100    | McF_6 | 0   | unif   | wholeT_0.5  | J1:CBN-A, S5:CBN-A, S5:OT, S5:OT-A                                                                     |
| 859 | No          | 7       | 7-B  | 100    | McF_6 | Inf | last   | singleC     | S5:OT-A                                                                                                |
| 860 | No          | 7       | 7-B  | 100    | McF_6 | Inf | last   | wholeT_0.01 | J5:OT-A                                                                                                |
| 861 | No          | 7       | 7-B  | 100    | McF_6 | Inf | last   | wholeT_0.5  | J1:OT-A, S5:OT-A                                                                                       |
| 862 | No          | 7       | 7-B  | 100    | McF_6 | Inf | unif   | singleC     | J5:CBN-A, S5:CBN-A, S5:OT, S5:OT-A                                                                     |

Table 13: *(continued)*

|     | Conjunction | Drivers | Tree | S.Size | Model | sh  | S.Time | S.Type      | Best method(s)                                  |
|-----|-------------|---------|------|--------|-------|-----|--------|-------------|-------------------------------------------------|
| 863 | No          | 7       | 7-B  | 100    | McF_6 | Inf | unif   | wholeT_0.01 | J1:CBN-A, J5:CBN-A, S5:CBN-A,<br>S5:OT-A        |
| 864 | No          | 7       | 7-B  | 100    | McF_6 | Inf | unif   | wholeT_0.5  | J1:CBN-A, J5:CBN-A, S5:CBN-A,<br>S5:OT, S5:OT-A |

## 5.2 Confidence sets (MCB), PFD, Drivers Unknown

Table 14: Confidence sets (method MCB) when Drivers are Unknown for measure PFD.

|    | Conjunction | Drivers | Tree | S.Size | Model | sh  | S.Time | S.Type      | Best method(s)                                                                                                 |
|----|-------------|---------|------|--------|-------|-----|--------|-------------|----------------------------------------------------------------------------------------------------------------|
| 1  | Yes         | 11      | 11-A | 1000   | Bozic | 0   | last   | singleC     | S1:OT, S1:OT-A                                                                                                 |
| 2  | Yes         | 11      | 11-A | 1000   | Bozic | 0   | last   | wholeT_0.01 | J1:DiP, J1:DiP-A, J5:DiP, J5:DiP-A, S1:DiP, S1:DiP-A, S5:DiP, S5:DiP-A                                         |
| 3  | Yes         | 11      | 11-A | 1000   | Bozic | 0   | last   | wholeT_0.5  | S1:OT, S1:OT-A                                                                                                 |
| 4  | Yes         | 11      | 11-A | 1000   | Bozic | 0   | unif   | singleC     | S1:CBN, S1:CBN-A                                                                                               |
| 5  | Yes         | 11      | 11-A | 1000   | Bozic | 0   | unif   | wholeT_0.01 | J1:CBN-A, J1:DiP-A, S5:CBN, S5:CBN-A, S5:DiP, S5:DiP-A, S5:OT, S5:OT-A                                         |
| 6  | Yes         | 11      | 11-A | 1000   | Bozic | 0   | unif   | wholeT_0.5  | S1:CBN, S1:CBN-A, S5:CBN, S5:CBN-A                                                                             |
| 7  | Yes         | 11      | 11-A | 1000   | Bozic | Inf | last   | singleC     | J1:DiP, J1:DiP-A, J1:OT, J1:OT-A, J5:DiP, J5:DiP-A, J5:OT, J5:OT-A, S1:DiP-A, S5:DiP, S5:DiP-A, S5:OT, S5:OT-A |
| 8  | Yes         | 11      | 11-A | 1000   | Bozic | Inf | last   | wholeT_0.01 | J5:DiP, J5:DiP-A, J5:OT, J5:OT-A                                                                               |
| 9  | Yes         | 11      | 11-A | 1000   | Bozic | Inf | last   | wholeT_0.5  | J1:DiP, J1:DiP-A, J1:OT, J1:OT-A, J5:DiP, J5:DiP-A, J5:OT, J5:OT-A, S5:DiP, S5:DiP-A, S5:OT, S5:OT-A           |
| 10 | Yes         | 11      | 11-A | 1000   | Bozic | Inf | unif   | singleC     | J1:CBN-A, S1:CBN, S1:CBN-A, S1:DiP, S1:DiP-A, S1:OT, S1:OT-A                                                   |
| 11 | Yes         | 11      | 11-A | 1000   | Bozic | Inf | unif   | wholeT_0.01 | J1:CBN, J1:CBN-A, S5:CBN-A, S5:OT, S5:OT-A                                                                     |
| 12 | Yes         | 11      | 11-A | 1000   | Bozic | Inf | unif   | wholeT_0.5  | S1:CBN, S1:CBN-A, S1:DiP-A, S1:OT, S1:OT-A                                                                     |
| 13 | Yes         | 11      | 11-A | 1000   | exp   | 0   | last   | singleC     | S1:OT, S1:OT-A                                                                                                 |
| 14 | Yes         | 11      | 11-A | 1000   | exp   | 0   | last   | wholeT_0.01 | J1:DiP, J1:DiP-A, J1:OT, J1:OT-A, S1:DiP-A, S1:OT, S5:DiP-A, S5:OT, S5:OT-A                                    |
| 15 | Yes         | 11      | 11-A | 1000   | exp   | 0   | last   | wholeT_0.5  | S1:OT, S1:OT-A                                                                                                 |
| 16 | Yes         | 11      | 11-A | 1000   | exp   | 0   | unif   | singleC     | S1:CBN, S1:CBN-A, S5:CBN, S5:CBN-A                                                                             |
| 17 | Yes         | 11      | 11-A | 1000   | exp   | 0   | unif   | wholeT_0.01 | S1:DiP, S1:DiP-A, S1:OT, S1:OT-A                                                                               |
| 18 | Yes         | 11      | 11-A | 1000   | exp   | 0   | unif   | wholeT_0.5  | S1:CBN, S1:CBN-A, S5:CBN, S5:CBN-A                                                                             |
| 19 | Yes         | 11      | 11-A | 1000   | exp   | Inf | last   | singleC     | J1:DiP, J1:DiP-A, J1:OT, J1:OT-A, S5:DiP, S5:DiP-A, S5:OT, S5:OT-A                                             |
| 20 | Yes         | 11      | 11-A | 1000   | exp   | Inf | last   | wholeT_0.01 | J5:DiP, J5:DiP-A, J5:OT, J5:OT-A, S5:DiP, S5:DiP-A, S5:OT, S5:OT-A                                             |
| 21 | Yes         | 11      | 11-A | 1000   | exp   | Inf | last   | wholeT_0.5  | J1:DiP, J1:DiP-A, J1:OT, J1:OT-A, S5:DiP, S5:OT, S5:OT-A                                                       |
| 22 | Yes         | 11      | 11-A | 1000   | exp   | Inf | unif   | singleC     | S1:CBN, S1:CBN-A, S1:OT, S1:OT-A                                                                               |

Table 14: (continued)

|    | Conjunction | Drivers | Tree | S.Size | Model | sh  | S.Time | S.Type      | Best method(s)                                                                                                                 |
|----|-------------|---------|------|--------|-------|-----|--------|-------------|--------------------------------------------------------------------------------------------------------------------------------|
| 23 | Yes         | 11      | 11-A | 1000   | exp   | Inf | unif   | wholeT_0.01 | J1:CBN-A, J1:DiP, J1:DiP-A, J1:OT, J1:OT-A                                                                                     |
| 24 | Yes         | 11      | 11-A | 1000   | exp   | Inf | unif   | wholeT_0.5  | S1:CBN, S1:CBN-A, S1:OT, S1:OT-A                                                                                               |
| 25 | Yes         | 11      | 11-A | 1000   | McF_4 | 0   | last   | singleC     | J1:DiP, J1:DiP-A, J1:OT, J1:OT-A, J5:DiP-A, J5:OT, J5:OT-A, S1:DiP-A, S1:OT, S1:OT-A, S5:DiP, S5:DiP-A, S5:OT, S5:OT-A         |
| 26 | Yes         | 11      | 11-A | 1000   | McF_4 | 0   | last   | wholeT_0.01 | J1:DiP, J1:DiP-A, J1:OT, J1:OT-A, J5:DiP, J5:DiP-A, J5:OT, J5:OT-A, S5:DiP, S5:OT, S5:OT-A                                     |
| 27 | Yes         | 11      | 11-A | 1000   | McF_4 | 0   | last   | wholeT_0.5  | J1:DiP, J1:DiP-A, J1:OT, J1:OT-A, J5:DiP, J5:DiP-A, J5:OT, J5:OT-A, S1:DiP-A, S1:OT, S1:OT-A, S5:DiP, S5:DiP-A, S5:OT, S5:OT-A |
| 28 | Yes         | 11      | 11-A | 1000   | McF_4 | 0   | unif   | singleC     | J1:CBN-A, J1:DiP, J1:OT, J1:OT-A, S1:DiP-A, S1:OT, S1:OT-A, S5:DiP, S5:DiP-A, S5:OT, S5:OT-A                                   |
| 29 | Yes         | 11      | 11-A | 1000   | McF_4 | 0   | unif   | wholeT_0.01 | J1:CBN-A, J1:DiP, J1:DiP-A, J1:OT, J1:OT-A, S5:DiP, S5:DiP-A, S5:OT, S5:OT-A                                                   |
| 30 | Yes         | 11      | 11-A | 1000   | McF_4 | 0   | unif   | wholeT_0.5  | J1:CBN, J1:DiP, J1:DiP-A, J1:OT, S1:DiP, S1:DiP-A, S1:OT, S1:OT-A, S5:DiP, S5:DiP-A, S5:OT, S5:OT-A                            |
| 31 | Yes         | 11      | 11-A | 1000   | McF_4 | Inf | last   | singleC     | J1:DiP, J1:DiP-A, J1:OT, J1:OT-A, J5:DiP, J5:DiP-A, J5:OT, J5:OT-A, S1:OT-A, S5:DiP, S5:DiP-A, S5:OT-A                         |
| 32 | Yes         | 11      | 11-A | 1000   | McF_4 | Inf | last   | wholeT_0.01 | J1:DiP, J1:DiP-A, J1:OT, J1:OT-A, J5:DiP, J5:DiP-A, J5:OT, J5:OT-A, S5:DiP, S5:DiP-A, S5:OT, S5:OT-A                           |
| 33 | Yes         | 11      | 11-A | 1000   | McF_4 | Inf | last   | wholeT_0.5  | J1:DiP, J1:DiP-A, J1:OT, J1:OT-A, J5:DiP, J5:DiP-A, J5:OT, J5:OT-A, S1:DiP-A, S1:OT, S1:OT-A, S5:DiP, S5:DiP-A, S5:OT, S5:OT-A |
| 34 | Yes         | 11      | 11-A | 1000   | McF_4 | Inf | unif   | singleC     | J1:CBN-A, J1:DiP, J1:DiP-A, J1:OT, J1:OT-A, S1:DiP, S1:DiP-A, S1:OT, S1:OT-A, S5:DiP, S5:DiP-A, S5:OT, S5:OT-A                 |

Table 14: (continued)

|    | Conjunction | Drivers | Tree | S.Size | Model | sh  | S.Time | S.Type      | Best method(s)                                                                                                                                                                      |
|----|-------------|---------|------|--------|-------|-----|--------|-------------|-------------------------------------------------------------------------------------------------------------------------------------------------------------------------------------|
| 35 | Yes         | 11      | 11-A | 1000   | McF_4 | Inf | unif   | wholeT_0.01 | J1:CBN-A, J1:DiP, J1:DiP-A, J1:OT, J1:OT-A, J5:DiP, J5:DiP-A, J5:OT, J5:OT-A, S1:DiP, S1:DiP-A, S5:CBN-A, S5:DiP, S5:DiP-A, S5:OT, S5:OT-A                                          |
| 36 | Yes         | 11      | 11-A | 1000   | McF_4 | Inf | unif   | wholeT_0.5  | J1:DiP, J1:DiP-A, J1:OT, J1:OT-A, S1:DiP, S1:DiP-A, S1:OT, S1:OT-A, S5:DiP-A, S5:OT, S5:OT-A                                                                                        |
| 37 | Yes         | 11      | 11-A | 1000   | McF_6 | 0   | last   | singleC     | J1:DiP, J1:OT, J5:DiP, J5:OT, S1:DiP, S1:OT, S5:DiP, S5:OT                                                                                                                          |
| 38 | Yes         | 11      | 11-A | 1000   | McF_6 | 0   | last   | wholeT_0.01 | J1:DiP, J1:OT, J5:DiP, J5:OT, S1:DiP, S5:DiP, S5:OT                                                                                                                                 |
| 39 | Yes         | 11      | 11-A | 1000   | McF_6 | 0   | last   | wholeT_0.5  | J1:DiP, J1:OT, J5:DiP, J5:OT, S1:DiP, S5:DiP, S5:OT                                                                                                                                 |
| 40 | Yes         | 11      | 11-A | 1000   | McF_6 | 0   | unif   | singleC     | J1:CBN, J1:CBN-A, J1:DiP, J1:DiP-A, J1:OT, J1:OT-A, J5:CBN, J5:CBN-A, J5:DiP, J5:DiP-A, J5:OT, J5:OT-A, S1:DiP, S1:DiP-A, S1:OT, S1:OT-A, S5:CBN, S5:CBN-A, S5:DiP, S5:DiP-A, S5:OT |
| 41 | Yes         | 11      | 11-A | 1000   | McF_6 | 0   | unif   | wholeT_0.01 | J1:CBN-A, J1:DiP, J1:DiP-A, J1:OT, J1:OT-A, J5:CBN, J5:CBN-A, J5:DiP, J5:DiP-A, J5:OT, J5:OT-A, S1:DiP, S1:DiP-A, S5:CBN, S5:DiP, S5:DiP-A, S5:OT, S5:OT-A                          |
| 42 | Yes         | 11      | 11-A | 1000   | McF_6 | 0   | unif   | wholeT_0.5  | J1:CBN, J1:DiP, J1:DiP-A, J1:OT-A, J5:CBN, J5:CBN-A, J5:DiP, J5:DiP-A, J5:OT, J5:OT-A, S1:DiP, S1:DiP-A, S1:OT, S1:OT-A, S5:CBN-A, S5:DiP, S5:DiP-A, S5:OT, S5:OT-A                 |
| 43 | Yes         | 11      | 11-A | 1000   | McF_6 | Inf | last   | singleC     | J1:DiP, J1:OT, J5:DiP, J5:OT, S1:DiP, S5:DiP, S5:OT                                                                                                                                 |
| 44 | Yes         | 11      | 11-A | 1000   | McF_6 | Inf | last   | wholeT_0.01 | J1:DiP, J1:OT, J5:DiP, J5:OT, S1:DiP, S5:DiP, S5:OT                                                                                                                                 |
| 45 | Yes         | 11      | 11-A | 1000   | McF_6 | Inf | last   | wholeT_0.5  | J1:DiP, J1:OT, J5:DiP, J5:OT, S1:DiP, S5:DiP, S5:OT                                                                                                                                 |
| 46 | Yes         | 11      | 11-A | 1000   | McF_6 | Inf | unif   | singleC     | J1:CBN-A, J1:DiP, J1:DiP-A, J5:CBN-A, J5:DiP, J5:DiP-A, J5:OT, J5:OT-A, S1:DiP, S1:DiP-A, S5:CBN-A, S5:DiP, S5:DiP-A, S5:OT, S5:OT-A                                                |

Table 14: (continued)

|    | Conjunction | Drivers | Tree | S.Size | Model | sh  | S.Time | S.Type      | Best method(s)                                                                                                                             |
|----|-------------|---------|------|--------|-------|-----|--------|-------------|--------------------------------------------------------------------------------------------------------------------------------------------|
| 47 | Yes         | 11      | 11-A | 1000   | McF_6 | Inf | unif   | wholeT_0.01 | J1:CBN, J1:CBN-A, J1:DiP, J1:DiP-A, J1:OT, J5:CBN-A, J5:DiP, J5:DiP-A, J5:OT, J5:OT-A, S1:DiP, S1:DiP-A, S5:CBN-A, S5:DiP, S5:DiP-A, S5:OT |
| 48 | Yes         | 11      | 11-A | 1000   | McF_6 | Inf | unif   | wholeT_0.5  | J1:CBN-A, J1:DiP, J1:DiP-A, J5:CBN, J5:CBN-A, J5:DiP, J5:DiP-A, J5:OT, J5:OT-A, S1:DiP, S1:DiP-A, S5:CBN-A, S5:DiP, S5:DiP-A               |
| 49 | Yes         | 11      | 11-A | 200    | Bozic | 0   | last   | singleC     | S1:OT, S5:OT, S5:OT-A                                                                                                                      |
| 50 | Yes         | 11      | 11-A | 200    | Bozic | 0   | last   | wholeT_0.01 | J1:CBN, J1:OT, J1:OT-A, J5:OT, J5:OT-A, S5:OT, S5:OT-A                                                                                     |
| 51 | Yes         | 11      | 11-A | 200    | Bozic | 0   | last   | wholeT_0.5  | S1:OT, S1:OT-A                                                                                                                             |
| 52 | Yes         | 11      | 11-A | 200    | Bozic | 0   | unif   | singleC     | S1:OT, S1:OT-A                                                                                                                             |
| 53 | Yes         | 11      | 11-A | 200    | Bozic | 0   | unif   | wholeT_0.01 | J1:DiP, J1:DiP-A, J1:OT-A, S1:DiP-A, S5:CBN, S5:CBN-A, S5:DiP, S5:DiP-A, S5:OT, S5:OT-A                                                    |
| 54 | Yes         | 11      | 11-A | 200    | Bozic | 0   | unif   | wholeT_0.5  | J1:CBN, J1:CBN-A, S1:CBN, S1:CBN-A                                                                                                         |
| 55 | Yes         | 11      | 11-A | 200    | Bozic | Inf | last   | singleC     | J5:OT, J5:OT-A, S5:OT, S5:OT-A                                                                                                             |
| 56 | Yes         | 11      | 11-A | 200    | Bozic | Inf | last   | wholeT_0.01 | J5:CBN-A, J5:OT, J5:OT-A                                                                                                                   |
| 57 | Yes         | 11      | 11-A | 200    | Bozic | Inf | last   | wholeT_0.5  | J5:OT, J5:OT-A, S5:OT, S5:OT-A                                                                                                             |
| 58 | Yes         | 11      | 11-A | 200    | Bozic | Inf | unif   | singleC     | J1:CBN, J1:CBN-A, J1:OT, J1:OT-A                                                                                                           |
| 59 | Yes         | 11      | 11-A | 200    | Bozic | Inf | unif   | wholeT_0.01 | S5:CBN, S5:CBN-A, S5:OT, S5:OT-A                                                                                                           |
| 60 | Yes         | 11      | 11-A | 200    | Bozic | Inf | unif   | wholeT_0.5  | J1:CBN, J1:CBN-A, J1:OT, J1:OT-A                                                                                                           |
| 61 | Yes         | 11      | 11-A | 200    | exp   | 0   | last   | singleC     | S1:OT, S1:OT-A                                                                                                                             |
| 62 | Yes         | 11      | 11-A | 200    | exp   | 0   | last   | wholeT_0.01 | J1:OT, J1:OT-A, S5:OT, S5:OT-A                                                                                                             |
| 63 | Yes         | 11      | 11-A | 200    | exp   | 0   | last   | wholeT_0.5  | S1:OT, S1:OT-A                                                                                                                             |
| 64 | Yes         | 11      | 11-A | 200    | exp   | 0   | unif   | singleC     | S1:CBN, S1:CBN-A, S5:CBN, S5:CBN-A                                                                                                         |
| 65 | Yes         | 11      | 11-A | 200    | exp   | 0   | unif   | wholeT_0.01 | S1:OT, S1:OT-A                                                                                                                             |
| 66 | Yes         | 11      | 11-A | 200    | exp   | 0   | unif   | wholeT_0.5  | S1:CBN, S1:CBN-A                                                                                                                           |
| 67 | Yes         | 11      | 11-A | 200    | exp   | Inf | last   | singleC     | J1:OT-A, S5:OT, S5:OT-A                                                                                                                    |
| 68 | Yes         | 11      | 11-A | 200    | exp   | Inf | last   | wholeT_0.01 | J5:CBN-A, J5:OT, J5:OT-A                                                                                                                   |
| 69 | Yes         | 11      | 11-A | 200    | exp   | Inf | last   | wholeT_0.5  | J1:OT, J1:OT-A, S5:OT, S5:OT-A                                                                                                             |
| 70 | Yes         | 11      | 11-A | 200    | exp   | Inf | unif   | singleC     | S1:OT, S1:OT-A                                                                                                                             |
| 71 | Yes         | 11      | 11-A | 200    | exp   | Inf | unif   | wholeT_0.01 | S5:CBN-A, S5:OT, S5:OT-A                                                                                                                   |
| 72 | Yes         | 11      | 11-A | 200    | exp   | Inf | unif   | wholeT_0.5  | S1:OT, S1:OT-A                                                                                                                             |
| 73 | Yes         | 11      | 11-A | 200    | McF_4 | 0   | last   | singleC     | J1:DiP-A, J1:OT, J1:OT-A, J5:DiP-A, J5:OT, J5:OT-A, S1:DiP, S5:DiP, S5:DiP-A, S5:OT, S5:OT-A                                               |

Table 14: (continued)

|    | Conjunction | Drivers | Tree | S.Size | Model | sh  | S.Time | S.Type      | Best method(s)                                                                                                                                             |
|----|-------------|---------|------|--------|-------|-----|--------|-------------|------------------------------------------------------------------------------------------------------------------------------------------------------------|
| 74 | Yes         | 11      | 11-A | 200    | McF_4 | 0   | last   | wholeT_0.01 | J1:DiP, J1:DiP-A, J1:OT, J1:OT-A, J5:DiP-A, J5:OT, J5:OT-A, S1:DiP-A, S5:DiP, S5:DiP-A, S5:OT, S5:OT-A                                                     |
| 75 | Yes         | 11      | 11-A | 200    | McF_4 | 0   | last   | wholeT_0.5  | J1:OT, J1:OT-A, J5:OT, J5:OT-A, S1:DiP-A, S5:DiP-A, S5:OT, S5:OT-A                                                                                         |
| 76 | Yes         | 11      | 11-A | 200    | McF_4 | 0   | unif   | singleC     | J1:CBN-A, J1:OT, J1:OT-A, S5:CBN-A, S5:OT, S5:OT-A                                                                                                         |
| 77 | Yes         | 11      | 11-A | 200    | McF_4 | 0   | unif   | wholeT_0.01 | J1:CBN-A, J1:DiP, J1:DiP-A, J1:OT, J1:OT-A, S1:DiP, S1:DiP-A, S5:CBN, S5:CBN-A, S5:DiP, S5:DiP-A, S5:OT, S5:OT-A                                           |
| 78 | Yes         | 11      | 11-A | 200    | McF_4 | 0   | unif   | wholeT_0.5  | J1:CBN, J1:CBN-A, J1:OT, J1:OT-A, S1:DiP, S5:CBN, S5:CBN-A, S5:OT, S5:OT-A                                                                                 |
| 79 | Yes         | 11      | 11-A | 200    | McF_4 | Inf | last   | singleC     | J1:OT, J1:OT-A, J5:OT, J5:OT-A, S5:OT, S5:OT-A                                                                                                             |
| 80 | Yes         | 11      | 11-A | 200    | McF_4 | Inf | last   | wholeT_0.01 | J1:DiP-A, J1:OT, J5:DiP-A, J5:OT, J5:OT-A, S5:OT-A                                                                                                         |
| 81 | Yes         | 11      | 11-A | 200    | McF_4 | Inf | last   | wholeT_0.5  | J1:OT, J1:OT-A, J5:OT, J5:OT-A, S5:OT, S5:OT-A                                                                                                             |
| 82 | Yes         | 11      | 11-A | 200    | McF_4 | Inf | unif   | singleC     | J1:CBN-A, J1:OT, J1:OT-A, J5:CBN-A, J5:OT, J5:OT-A, S5:CBN-A, S5:OT, S5:OT-A                                                                               |
| 83 | Yes         | 11      | 11-A | 200    | McF_4 | Inf | unif   | wholeT_0.01 | J1:CBN-A, J1:OT, J1:OT-A, J5:OT, J5:OT-A, S5:CBN-A, S5:OT, S5:OT-A                                                                                         |
| 84 | Yes         | 11      | 11-A | 200    | McF_4 | Inf | unif   | wholeT_0.5  | J1:CBN-A, J1:OT, J1:OT-A, J5:OT, J5:OT-A, S5:OT, S5:OT-A                                                                                                   |
| 85 | Yes         | 11      | 11-A | 200    | McF_6 | 0   | last   | singleC     | J1:OT, J5:OT, S1:DiP, S5:DiP, S5:OT                                                                                                                        |
| 86 | Yes         | 11      | 11-A | 200    | McF_6 | 0   | last   | wholeT_0.01 | J1:DiP, J5:DiP, J5:OT, S1:DiP, S5:DiP                                                                                                                      |
| 87 | Yes         | 11      | 11-A | 200    | McF_6 | 0   | last   | wholeT_0.5  | J1:OT, J5:OT, S1:DiP, S5:DiP, S5:OT                                                                                                                        |
| 88 | Yes         | 11      | 11-A | 200    | McF_6 | 0   | unif   | singleC     | J1:CBN, J1:CBN-A, J1:OT, J1:OT-A, J5:CBN, J5:CBN-A, J5:DiP-A, J5:OT, J5:OT-A, S5:CBN, S5:CBN-A, S5:OT, S5:OT-A                                             |
| 89 | Yes         | 11      | 11-A | 200    | McF_6 | 0   | unif   | wholeT_0.01 | J1:CBN, J1:CBN-A, J1:DiP, J1:DiP-A, J1:OT, J1:OT-A, J5:CBN, J5:CBN-A, J5:DiP, J5:DiP-A, J5:OT, J5:OT-A, S5:CBN, S5:CBN-A, S5:DiP, S5:DiP-A, S5:OT, S5:OT-A |



Table 14: (continued)

|     | Conjunction | Drivers | Tree | S.Size | Model | sh  | S.Time | S.Type      | Best method(s)                                                                                                                                     |
|-----|-------------|---------|------|--------|-------|-----|--------|-------------|----------------------------------------------------------------------------------------------------------------------------------------------------|
| 90  | Yes         | 11      | 11-A | 200    | McF_6 | 0   | unif   | wholeT_0.5  | J1:CBN, J1:CBN-A, J1:DiP, J1:DiP-A, J1:OT, J1:OT-A, J5:CBN, J5:CBN-A, J5:DiP-A, J5:OT, J5:OT-A, S5:CBN, S5:CBN-A, S5:DiP, S5:DiP-A, S5:OT, S5:OT-A |
| 91  | Yes         | 11      | 11-A | 200    | McF_6 | Inf | last   | singleC     | J1:OT, J5:OT, S5:OT                                                                                                                                |
| 92  | Yes         | 11      | 11-A | 200    | McF_6 | Inf | last   | wholeT_0.01 | J1:OT, J5:OT, S5:OT                                                                                                                                |
| 93  | Yes         | 11      | 11-A | 200    | McF_6 | Inf | last   | wholeT_0.5  | J1:OT, J5:OT, S5:OT                                                                                                                                |
| 94  | Yes         | 11      | 11-A | 200    | McF_6 | Inf | unif   | singleC     | J1:CBN-A, J1:OT, J1:OT-A, J5:CBN, J5:CBN-A, J5:OT, J5:OT-A, S5:CBN, S5:CBN-A, S5:OT, S5:OT-A                                                       |
| 95  | Yes         | 11      | 11-A | 200    | McF_6 | Inf | unif   | wholeT_0.01 | J1:CBN, J1:CBN-A, J1:OT, J1:OT-A, J5:CBN-A, J5:OT, J5:OT-A, S5:CBN, S5:CBN-A, S5:OT, S5:OT-A                                                       |
| 96  | Yes         | 11      | 11-A | 200    | McF_6 | Inf | unif   | wholeT_0.5  | J1:CBN, J1:CBN-A, J1:OT, J1:OT-A, J5:CBN, J5:CBN-A, J5:OT, J5:OT-A, S5:CBN, S5:CBN-A, S5:OT, S5:OT-A                                               |
| 97  | Yes         | 11      | 11-A | 100    | Bozic | 0   | last   | singleC     | S5:OT, S5:OT-A                                                                                                                                     |
| 98  | Yes         | 11      | 11-A | 100    | Bozic | 0   | last   | wholeT_0.01 | J5:OT, J5:OT-A, S5:OT, S5:OT-A                                                                                                                     |
| 99  | Yes         | 11      | 11-A | 100    | Bozic | 0   | last   | wholeT_0.5  | J1:CBN, J1:CBN-A, J1:OT, J1:OT-A, S1:OT, S1:OT-A, S5:CBN-A                                                                                         |
| 100 | Yes         | 11      | 11-A | 100    | Bozic | 0   | unif   | singleC     | J1:CBN-A, S1:OT, S1:OT-A                                                                                                                           |
| 101 | Yes         | 11      | 11-A | 100    | Bozic | 0   | unif   | wholeT_0.01 | S5:OT, S5:OT-A                                                                                                                                     |
| 102 | Yes         | 11      | 11-A | 100    | Bozic | 0   | unif   | wholeT_0.5  | S1:OT, S1:OT-A                                                                                                                                     |
| 103 | Yes         | 11      | 11-A | 100    | Bozic | Inf | last   | singleC     | J5:OT, J5:OT-A                                                                                                                                     |
| 104 | Yes         | 11      | 11-A | 100    | Bozic | Inf | last   | wholeT_0.01 | J5:CBN-A, J5:OT, J5:OT-A                                                                                                                           |
| 105 | Yes         | 11      | 11-A | 100    | Bozic | Inf | last   | wholeT_0.5  | J5:OT, J5:OT-A                                                                                                                                     |
| 106 | Yes         | 11      | 11-A | 100    | Bozic | Inf | unif   | singleC     | J1:CBN, J1:CBN-A, J1:OT, J1:OT-A, S1:OT, S1:OT-A, S5:CBN, S5:CBN-A                                                                                 |
| 107 | Yes         | 11      | 11-A | 100    | Bozic | Inf | unif   | wholeT_0.01 | J5:OT, J5:OT-A                                                                                                                                     |
| 108 | Yes         | 11      | 11-A | 100    | Bozic | Inf | unif   | wholeT_0.5  | J1:CBN, J1:CBN-A, J1:OT, J1:OT-A, S1:OT, S1:OT-A, S5:CBN, S5:CBN-A                                                                                 |
| 109 | Yes         | 11      | 11-A | 100    | exp   | 0   | last   | singleC     | S1:OT, S1:OT-A                                                                                                                                     |
| 110 | Yes         | 11      | 11-A | 100    | exp   | 0   | last   | wholeT_0.01 | J1:OT, J1:OT-A, S5:OT, S5:OT-A                                                                                                                     |
| 111 | Yes         | 11      | 11-A | 100    | exp   | 0   | last   | wholeT_0.5  | S1:OT, S1:OT-A                                                                                                                                     |
| 112 | Yes         | 11      | 11-A | 100    | exp   | 0   | unif   | singleC     | S1:CBN, S1:CBN-A                                                                                                                                   |
| 113 | Yes         | 11      | 11-A | 100    | exp   | 0   | unif   | wholeT_0.01 | J1:CBN-A, S1:OT, S1:OT-A                                                                                                                           |
| 114 | Yes         | 11      | 11-A | 100    | exp   | 0   | unif   | wholeT_0.5  | S1:CBN, S1:CBN-A, S5:CBN, S5:CBN-A                                                                                                                 |
| 115 | Yes         | 11      | 11-A | 100    | exp   | Inf | last   | singleC     | S5:OT, S5:OT-A                                                                                                                                     |
| 116 | Yes         | 11      | 11-A | 100    | exp   | Inf | last   | wholeT_0.01 | J5:CBN-A, J5:OT, J5:OT-A                                                                                                                           |

Table 14: (continued)

|     | Conjunction | Drivers | Tree | S.Size | Model | sh  | S.Time | S.Type      | Best method(s)                                                                                                                             |
|-----|-------------|---------|------|--------|-------|-----|--------|-------------|--------------------------------------------------------------------------------------------------------------------------------------------|
| 117 | Yes         | 11      | 11-A | 100    | exp   | Inf | last   | wholeT_0.5  | S5:OT, S5:OT-A                                                                                                                             |
| 118 | Yes         | 11      | 11-A | 100    | exp   | Inf | unif   | singleC     | J1:CBN-A, J1:OT, J1:OT-A, S1:OT, S1:OT-A                                                                                                   |
| 119 | Yes         | 11      | 11-A | 100    | exp   | Inf | unif   | wholeT_0.01 | S5:CBN, S5:OT, S5:OT-A                                                                                                                     |
| 120 | Yes         | 11      | 11-A | 100    | exp   | Inf | unif   | wholeT_0.5  | J1:CBN-A, J1:OT, J1:OT-A, S1:OT, S1:OT-A                                                                                                   |
| 121 | Yes         | 11      | 11-A | 100    | McF_4 | 0   | last   | singleC     | J5:OT, J5:OT-A, S5:OT, S5:OT-A                                                                                                             |
| 122 | Yes         | 11      | 11-A | 100    | McF_4 | 0   | last   | wholeT_0.01 | J1:DiP-A, J1:OT-A, J5:OT, J5:OT-A, S1:DiP, S1:DiP-A, S5:DiP, S5:DiP-A, S5:OT, S5:OT-A                                                      |
| 123 | Yes         | 11      | 11-A | 100    | McF_4 | 0   | last   | wholeT_0.5  | J5:OT, J5:OT-A, S5:OT, S5:OT-A                                                                                                             |
| 124 | Yes         | 11      | 11-A | 100    | McF_4 | 0   | unif   | singleC     | J1:CBN, J1:OT, J1:OT-A, S5:OT, S5:OT-A                                                                                                     |
| 125 | Yes         | 11      | 11-A | 100    | McF_4 | 0   | unif   | wholeT_0.01 | S5:CBN, S5:CBN-A, S5:DiP-A, S5:OT, S5:OT-A                                                                                                 |
| 126 | Yes         | 11      | 11-A | 100    | McF_4 | 0   | unif   | wholeT_0.5  | J1:CBN-A, J1:OT, J1:OT-A, S5:CBN, S5:CBN-A, S5:OT, S5:OT-A                                                                                 |
| 127 | Yes         | 11      | 11-A | 100    | McF_4 | Inf | last   | singleC     | J5:OT, J5:OT-A, S5:OT, S5:OT-A                                                                                                             |
| 128 | Yes         | 11      | 11-A | 100    | McF_4 | Inf | last   | wholeT_0.01 | J5:OT, J5:OT-A                                                                                                                             |
| 129 | Yes         | 11      | 11-A | 100    | McF_4 | Inf | last   | wholeT_0.5  | J5:OT, J5:OT-A, S5:OT, S5:OT-A                                                                                                             |
| 130 | Yes         | 11      | 11-A | 100    | McF_4 | Inf | unif   | singleC     | J1:OT, J1:OT-A, J5:OT, J5:OT-A, S5:CBN-A, S5:OT, S5:OT-A                                                                                   |
| 131 | Yes         | 11      | 11-A | 100    | McF_4 | Inf | unif   | wholeT_0.01 | J5:OT, J5:OT-A, S5:OT, S5:OT-A                                                                                                             |
| 132 | Yes         | 11      | 11-A | 100    | McF_4 | Inf | unif   | wholeT_0.5  | J1:CBN-A, J1:OT, J5:OT, J5:OT-A, S5:CBN-A, S5:OT, S5:OT-A                                                                                  |
| 133 | Yes         | 11      | 11-A | 100    | McF_6 | 0   | last   | singleC     | J1:OT, J5:OT, S1:DiP, S5:DiP, S5:OT                                                                                                        |
| 134 | Yes         | 11      | 11-A | 100    | McF_6 | 0   | last   | wholeT_0.01 | J1:DiP, J5:OT, S1:DiP, S5:DiP, S5:OT                                                                                                       |
| 135 | Yes         | 11      | 11-A | 100    | McF_6 | 0   | last   | wholeT_0.5  | J1:OT, J5:OT, S5:OT                                                                                                                        |
| 136 | Yes         | 11      | 11-A | 100    | McF_6 | 0   | unif   | singleC     | J1:CBN, J1:CBN-A, J5:CBN, J5:CBN-A, J5:OT, J5:OT-A, S5:CBN-A, S5:OT                                                                        |
| 137 | Yes         | 11      | 11-A | 100    | McF_6 | 0   | unif   | wholeT_0.01 | J1:CBN-A, J1:DiP, J1:DiP-A, J5:CBN, J5:CBN-A, J5:DiP, J5:DiP-A, J5:OT, J5:OT-A, S1:DiP, S1:DiP-A, S5:CBN, S5:DiP, S5:DiP-A, S5:OT, S5:OT-A |
| 138 | Yes         | 11      | 11-A | 100    | McF_6 | 0   | unif   | wholeT_0.5  | J1:CBN, J1:CBN-A, J1:OT, J1:OT-A, J5:CBN-A, S5:CBN, S5:CBN-A                                                                               |
| 139 | Yes         | 11      | 11-A | 100    | McF_6 | Inf | last   | singleC     | J1:OT, J5:OT, S5:OT                                                                                                                        |
| 140 | Yes         | 11      | 11-A | 100    | McF_6 | Inf | last   | wholeT_0.01 | J5:OT, S5:OT                                                                                                                               |
| 141 | Yes         | 11      | 11-A | 100    | McF_6 | Inf | last   | wholeT_0.5  | J1:OT, J5:OT, S5:OT                                                                                                                        |

Table 14: (continued)

|     | Conjunction | Drivers | Tree | S.Size | Model | sh  | S.Time | S.Type      | Best method(s)                                                                                                               |
|-----|-------------|---------|------|--------|-------|-----|--------|-------------|------------------------------------------------------------------------------------------------------------------------------|
| 142 | Yes         | 11      | 11-A | 100    | McF_6 | Inf | unif   | singleC     | J1:CBN, J1:CBN-A, J1:OT, J1:OT-A, J5:CBN-A, J5:OT, J5:OT-A, S5:CBN, S5:CBN-A, S5:OT, S5:OT-A                                 |
| 143 | Yes         | 11      | 11-A | 100    | McF_6 | Inf | unif   | wholeT_0.01 | J1:CBN-A, J5:CBN, J5:CBN-A, J5:OT, J5:OT-A, S5:CBN, S5:CBN-A, S5:OT, S5:OT-A                                                 |
| 144 | Yes         | 11      | 11-A | 100    | McF_6 | Inf | unif   | wholeT_0.5  | J1:CBN-A, J1:OT, J1:OT-A, J5:CBN-A, J5:OT, J5:OT-A, S5:CBN, S5:CBN-A, S5:OT, S5:OT-A                                         |
| 145 | Yes         | 9       | 9-A  | 1000   | Bozic | 0   | last   | singleC     | S1:OT, S1:OT-A                                                                                                               |
| 146 | Yes         | 9       | 9-A  | 1000   | Bozic | 0   | last   | wholeT_0.01 | J1:DiP, J1:OT, J1:OT-A, J5:DiP, J5:DiP-A, J5:OT, J5:OT-A, S1:DiP, S1:DiP-A, S1:OT, S1:OT-A, S5:DiP, S5:DiP-A, S5:OT, S5:OT-A |
| 147 | Yes         | 9       | 9-A  | 1000   | Bozic | 0   | last   | wholeT_0.5  | S1:OT, S1:OT-A                                                                                                               |
| 148 | Yes         | 9       | 9-A  | 1000   | Bozic | 0   | unif   | singleC     | S1:CBN, S1:CBN-A, S5:CBN, S5:CBN-A                                                                                           |
| 149 | Yes         | 9       | 9-A  | 1000   | Bozic | 0   | unif   | wholeT_0.01 | J1:DiP, J1:DiP-A, J1:OT, J1:OT-A, S1:DiP, S1:DiP-A, S1:OT, S1:OT-A                                                           |
| 150 | Yes         | 9       | 9-A  | 1000   | Bozic | 0   | unif   | wholeT_0.5  | S1:CBN, S1:CBN-A, S5:CBN, S5:CBN-A                                                                                           |
| 151 | Yes         | 9       | 9-A  | 1000   | Bozic | Inf | last   | singleC     | J1:DiP, J1:DiP-A, J1:OT, J1:OT-A, J5:DiP, J5:DiP-A, J5:OT, J5:OT-A, S5:OT, S5:OT-A                                           |
| 152 | Yes         | 9       | 9-A  | 1000   | Bozic | Inf | last   | wholeT_0.01 | J5:DiP, J5:DiP-A, J5:OT, J5:OT-A                                                                                             |
| 153 | Yes         | 9       | 9-A  | 1000   | Bozic | Inf | last   | wholeT_0.5  | J1:DiP, J1:DiP-A, J1:OT-A, J5:DiP, J5:DiP-A, J5:OT, J5:OT-A, S5:DiP, S5:DiP-A, S5:OT, S5:OT-A                                |
| 154 | Yes         | 9       | 9-A  | 1000   | Bozic | Inf | unif   | singleC     | S1:CBN, S1:DiP, S1:DiP-A, S1:OT, S1:OT-A                                                                                     |
| 155 | Yes         | 9       | 9-A  | 1000   | Bozic | Inf | unif   | wholeT_0.01 | S5:DiP, S5:DiP-A, S5:OT, S5:OT-A                                                                                             |
| 156 | Yes         | 9       | 9-A  | 1000   | Bozic | Inf | unif   | wholeT_0.5  | S1:CBN, S1:DiP-A, S1:OT, S1:OT-A                                                                                             |
| 157 | Yes         | 9       | 9-A  | 1000   | exp   | 0   | last   | singleC     | S1:CBN, S1:CBN-A, S5:CBN, S5:CBN-A                                                                                           |
| 158 | Yes         | 9       | 9-A  | 1000   | exp   | 0   | last   | wholeT_0.01 | S1:DiP-A, S1:OT, S1:OT-A                                                                                                     |
| 159 | Yes         | 9       | 9-A  | 1000   | exp   | 0   | last   | wholeT_0.5  | J1:CBN, J1:CBN-A, S1:CBN, S1:CBN-A, S5:CBN, S5:CBN-A                                                                         |
| 160 | Yes         | 9       | 9-A  | 1000   | exp   | 0   | unif   | singleC     | S1:CBN, S1:CBN-A, S5:CBN, S5:CBN-A                                                                                           |
| 161 | Yes         | 9       | 9-A  | 1000   | exp   | 0   | unif   | wholeT_0.01 | J1:CBN, S1:CBN, S1:CBN-A, S5:CBN-A                                                                                           |
| 162 | Yes         | 9       | 9-A  | 1000   | exp   | 0   | unif   | wholeT_0.5  | S1:CBN, S1:CBN-A, S5:CBN, S5:CBN-A                                                                                           |
| 163 | Yes         | 9       | 9-A  | 1000   | exp   | Inf | last   | singleC     | J1:DiP, J1:DiP-A, J1:OT, S5:DiP, S5:DiP-A, S5:OT, S5:OT-A                                                                    |
| 164 | Yes         | 9       | 9-A  | 1000   | exp   | Inf | last   | wholeT_0.01 | J5:DiP, J5:DiP-A, J5:OT, J5:OT-A                                                                                             |

Table 14: (continued)

|     | Conjunction | Drivers | Tree | S.Size | Model | sh  | S.Time | S.Type      | Best method(s)                                                                                                                         |
|-----|-------------|---------|------|--------|-------|-----|--------|-------------|----------------------------------------------------------------------------------------------------------------------------------------|
| 165 | Yes         | 9       | 9-A  | 1000   | exp   | Inf | last   | wholeT_0.5  | J1:DiP, J1:DiP-A, J1:OT, J1:OT-A, S5:DiP, S5:DiP-A, S5:OT, S5:OT-A                                                                     |
| 166 | Yes         | 9       | 9-A  | 1000   | exp   | Inf | unif   | singleC     | S1:OT, S1:OT-A                                                                                                                         |
| 167 | Yes         | 9       | 9-A  | 1000   | exp   | Inf | unif   | wholeT_0.01 | J1:DiP, J1:DiP-A, J1:OT, J1:OT-A                                                                                                       |
| 168 | Yes         | 9       | 9-A  | 1000   | exp   | Inf | unif   | wholeT_0.5  | S1:OT, S1:OT-A                                                                                                                         |
| 169 | Yes         | 9       | 9-A  | 1000   | McF_4 | 0   | last   | singleC     | J1:DiP, J1:DiP-A, J1:OT, J1:OT-A, J5:DiP, J5:DiP-A, J5:OT, J5:OT-A, S1:DiP, S1:DiP-A, S1:OT, S5:DiP, S5:DiP-A, S5:OT, S5:OT-A          |
| 170 | Yes         | 9       | 9-A  | 1000   | McF_4 | 0   | last   | wholeT_0.01 | J1:DiP, J1:DiP-A, J1:OT, J1:OT-A, J5:DiP, J5:DiP-A, J5:OT, J5:OT-A, S5:DiP, S5:DiP-A, S5:OT, S5:OT-A                                   |
| 171 | Yes         | 9       | 9-A  | 1000   | McF_4 | 0   | last   | wholeT_0.5  | J1:DiP, J1:DiP-A, J1:OT, J1:OT-A, J5:DiP, J5:DiP-A, J5:OT, J5:OT-A, S1:DiP, S1:DiP-A, S1:OT, S1:OT-A, S5:DiP, S5:DiP-A, S5:OT, S5:OT-A |
| 172 | Yes         | 9       | 9-A  | 1000   | McF_4 | 0   | unif   | singleC     | J1:DiP, J1:DiP-A, J1:OT, J1:OT-A, S1:DiP, S1:DiP-A, S1:OT, S1:OT-A, S5:DiP, S5:DiP-A, S5:OT, S5:OT-A                                   |
| 173 | Yes         | 9       | 9-A  | 1000   | McF_4 | 0   | unif   | wholeT_0.01 | J1:DiP, J1:DiP-A, J1:OT, J1:OT-A, S1:DiP-A, S5:DiP, S5:DiP-A, S5:OT, S5:OT-A                                                           |
| 174 | Yes         | 9       | 9-A  | 1000   | McF_4 | 0   | unif   | wholeT_0.5  | J1:DiP, J1:DiP-A, J1:OT, J1:OT-A, S1:DiP, S1:DiP-A, S1:OT, S1:OT-A, S5:DiP, S5:DiP-A, S5:OT, S5:OT-A                                   |
| 175 | Yes         | 9       | 9-A  | 1000   | McF_4 | Inf | last   | singleC     | J1:DiP, J1:DiP-A, J1:OT, J1:OT-A, J5:DiP, J5:DiP-A, J5:OT, J5:OT-A, S1:OT, S1:OT-A, S5:DiP, S5:DiP-A, S5:OT, S5:OT-A                   |
| 176 | Yes         | 9       | 9-A  | 1000   | McF_4 | Inf | last   | wholeT_0.01 | J1:DiP, J1:OT, J5:DiP, J5:OT, S1:DiP, S5:DiP, S5:OT                                                                                    |
| 177 | Yes         | 9       | 9-A  | 1000   | McF_4 | Inf | last   | wholeT_0.5  | J1:DiP, J1:DiP-A, J1:OT, J1:OT-A, J5:DiP, J5:DiP-A, J5:OT, J5:OT-A, S1:DiP, S1:DiP-A, S1:OT, S1:OT-A, S5:DiP, S5:DiP-A, S5:OT, S5:OT-A |
| 178 | Yes         | 9       | 9-A  | 1000   | McF_4 | Inf | unif   | singleC     | J1:DiP, J1:DiP-A, J1:OT, J1:OT-A, S1:OT, S1:OT-A, S5:DiP, S5:DiP-A, S5:OT, S5:OT-A                                                     |
| 179 | Yes         | 9       | 9-A  | 1000   | McF_4 | Inf | unif   | wholeT_0.01 | J1:DiP, J1:DiP-A, J1:OT, J1:OT-A, S5:DiP, S5:DiP-A, S5:OT, S5:OT-A                                                                     |

Table 14: (continued)

|     | Conjunction | Drivers | Tree | S.Size | Model | sh  | S.Time | S.Type      | Best method(s)                                                                                                                                                                                         |
|-----|-------------|---------|------|--------|-------|-----|--------|-------------|--------------------------------------------------------------------------------------------------------------------------------------------------------------------------------------------------------|
| 180 | Yes         | 9       | 9-A  | 1000   | McF_4 | Inf | unif   | wholeT_0.5  | J1:DiP, J1:DiP-A, J1:OT, J1:OT-A, S1:DiP, S1:DiP-A, S1:OT, S1:OT-A, S5:CBN-A, S5:DiP, S5:DiP-A, S5:OT, S5:OT-A                                                                                         |
| 181 | Yes         | 9       | 9-A  | 1000   | McF_6 | 0   | last   | singleC     | J1:DiP, J1:OT, J5:DiP, J5:OT, S5:DiP, S5:OT                                                                                                                                                            |
| 182 | Yes         | 9       | 9-A  | 1000   | McF_6 | 0   | last   | wholeT_0.01 | J1:DiP, J1:OT, J5:DiP, J5:OT, S5:OT                                                                                                                                                                    |
| 183 | Yes         | 9       | 9-A  | 1000   | McF_6 | 0   | last   | wholeT_0.5  | J1:DiP, J1:OT, J5:DiP, J5:OT, S1:DiP, S5:DiP, S5:OT                                                                                                                                                    |
| 184 | Yes         | 9       | 9-A  | 1000   | McF_6 | 0   | unif   | singleC     | J1:CBN, J1:CBN-A, J1:DiP, J1:DiP-A, J1:OT, J1:OT-A, J5:CBN, J5:CBN-A, J5:DiP, J5:DiP-A, J5:OT, J5:OT-A, S1:DiP, S1:DiP-A, S1:OT, S1:OT-A, S5:CBN, S5:CBN-A, S5:DiP, S5:DiP-A, S5:OT, S5:OT-A           |
| 185 | Yes         | 9       | 9-A  | 1000   | McF_6 | 0   | unif   | wholeT_0.01 | J1:CBN, J1:CBN-A, J1:DiP, J1:DiP-A, J1:OT, J1:OT-A, J5:CBN, J5:CBN-A, J5:DiP, J5:DiP-A, J5:OT, J5:OT-A, S1:DiP, S5:CBN-A, S5:DiP, S5:OT, S5:OT-A                                                       |
| 186 | Yes         | 9       | 9-A  | 1000   | McF_6 | 0   | unif   | wholeT_0.5  | J1:CBN, J1:CBN-A, J1:DiP, J1:DiP-A, J1:OT, J1:OT-A, J5:CBN, J5:CBN-A, J5:DiP, J5:DiP-A, J5:OT, J5:OT-A, S1:CBN-A, S1:DiP, S1:DiP-A, S1:OT, S1:OT-A, S5:CBN, S5:CBN-A, S5:DiP, S5:DiP-A, S5:OT, S5:OT-A |
| 187 | Yes         | 9       | 9-A  | 1000   | McF_6 | Inf | last   | singleC     | J1:DiP, J1:OT, J5:DiP, J5:OT, S1:DiP, S5:DiP, S5:OT                                                                                                                                                    |
| 188 | Yes         | 9       | 9-A  | 1000   | McF_6 | Inf | last   | wholeT_0.01 | J1:DiP, J1:OT, J5:DiP, J5:OT, S5:OT                                                                                                                                                                    |
| 189 | Yes         | 9       | 9-A  | 1000   | McF_6 | Inf | last   | wholeT_0.5  | J1:DiP, J1:OT, J5:DiP, J5:OT, S1:DiP, S5:DiP, S5:OT                                                                                                                                                    |
| 190 | Yes         | 9       | 9-A  | 1000   | McF_6 | Inf | unif   | singleC     | J1:CBN, J1:CBN-A, J1:DiP, J1:DiP-A, J1:OT, J1:OT-A, J5:CBN, J5:CBN-A, J5:DiP, J5:DiP-A, J5:OT, J5:OT-A, S1:DiP, S1:DiP-A, S1:OT, S1:OT-A, S5:CBN, S5:CBN-A, S5:DiP, S5:DiP-A, S5:OT, S5:OT-A           |

Table 14: (continued)

|     | Conjunction | Drivers | Tree | S.Size | Model | sh  | S.Time | S.Type      | Best method(s)                                                                                                                                                               |
|-----|-------------|---------|------|--------|-------|-----|--------|-------------|------------------------------------------------------------------------------------------------------------------------------------------------------------------------------|
| 191 | Yes         | 9       | 9-A  | 1000   | McF_6 | Inf | unif   | wholeT_0.01 | J1:CBN, J1:CBN-A, J1:DiP, J1:DiP-A, J1:OT, J1:OT-A, J5:CBN, J5:CBN-A, J5:DiP, J5:DiP-A, J5:OT, J5:OT-A, S1:DiP, S1:DiP-A, S5:CBN, S5:CBN-A, S5:DiP, S5:DiP-A, S5:OT, S5:OT-A |
| 192 | Yes         | 9       | 9-A  | 1000   | McF_6 | Inf | unif   | wholeT_0.5  | J1:CBN, J1:DiP, J1:DiP-A, J1:OT, J1:OT-A, J5:CBN, J5:CBN-A, J5:DiP, J5:DiP-A, J5:OT, J5:OT-A, S1:DiP, S1:DiP-A, S1:OT, S1:OT-A, S5:CBN, S5:CBN-A, S5:DiP, S5:DiP-A, S5:OT-A  |
| 193 | Yes         | 9       | 9-A  | 200    | Bozic | 0   | last   | singleC     | S1:OT, S1:OT-A                                                                                                                                                               |
| 194 | Yes         | 9       | 9-A  | 200    | Bozic | 0   | last   | wholeT_0.01 | J1:OT, J1:OT-A, J5:OT, J5:OT-A, S5:OT, S5:OT-A                                                                                                                               |
| 195 | Yes         | 9       | 9-A  | 200    | Bozic | 0   | last   | wholeT_0.5  | S1:OT, S1:OT-A                                                                                                                                                               |
| 196 | Yes         | 9       | 9-A  | 200    | Bozic | 0   | unif   | singleC     | J1:CBN, J1:CBN-A, S1:CBN, S1:CBN-A, S5:CBN, S5:CBN-A                                                                                                                         |
| 197 | Yes         | 9       | 9-A  | 200    | Bozic | 0   | unif   | wholeT_0.01 | S1:DiP, S1:DiP-A                                                                                                                                                             |
| 198 | Yes         | 9       | 9-A  | 200    | Bozic | 0   | unif   | wholeT_0.5  | J1:CBN, J1:CBN-A, S1:CBN, S1:CBN-A, S5:CBN, S5:CBN-A                                                                                                                         |
| 199 | Yes         | 9       | 9-A  | 200    | Bozic | Inf | last   | singleC     | J5:OT, J5:OT-A, S5:OT                                                                                                                                                        |
| 200 | Yes         | 9       | 9-A  | 200    | Bozic | Inf | last   | wholeT_0.01 | J5:CBN-A, J5:OT, J5:OT-A                                                                                                                                                     |
| 201 | Yes         | 9       | 9-A  | 200    | Bozic | Inf | last   | wholeT_0.5  | J5:OT, J5:OT-A, S5:OT-A                                                                                                                                                      |
| 202 | Yes         | 9       | 9-A  | 200    | Bozic | Inf | unif   | singleC     | S1:CBN, S1:CBN-A, S1:OT, S1:OT-A                                                                                                                                             |
| 203 | Yes         | 9       | 9-A  | 200    | Bozic | Inf | unif   | wholeT_0.01 | S5:OT, S5:OT-A                                                                                                                                                               |
| 204 | Yes         | 9       | 9-A  | 200    | Bozic | Inf | unif   | wholeT_0.5  | S1:OT, S1:OT-A                                                                                                                                                               |
| 205 | Yes         | 9       | 9-A  | 200    | exp   | 0   | last   | singleC     | S1:CBN                                                                                                                                                                       |
| 206 | Yes         | 9       | 9-A  | 200    | exp   | 0   | last   | wholeT_0.01 | S1:OT, S1:OT-A                                                                                                                                                               |
| 207 | Yes         | 9       | 9-A  | 200    | exp   | 0   | last   | wholeT_0.5  | J1:CBN, J1:CBN-A, S1:CBN, S1:CBN-A, S5:CBN, S5:CBN-A                                                                                                                         |
| 208 | Yes         | 9       | 9-A  | 200    | exp   | 0   | unif   | singleC     | S1:CBN, S1:CBN-A, S5:CBN, S5:CBN-A                                                                                                                                           |
| 209 | Yes         | 9       | 9-A  | 200    | exp   | 0   | unif   | wholeT_0.01 | S1:OT, S1:OT-A                                                                                                                                                               |
| 210 | Yes         | 9       | 9-A  | 200    | exp   | 0   | unif   | wholeT_0.5  | S1:CBN, S1:CBN-A, S5:CBN, S5:CBN-A                                                                                                                                           |
| 211 | Yes         | 9       | 9-A  | 200    | exp   | Inf | last   | singleC     | J1:OT, J1:OT-A, S5:OT, S5:OT-A                                                                                                                                               |
| 212 | Yes         | 9       | 9-A  | 200    | exp   | Inf | last   | wholeT_0.01 | J5:OT, J5:OT-A                                                                                                                                                               |
| 213 | Yes         | 9       | 9-A  | 200    | exp   | Inf | last   | wholeT_0.5  | J1:OT, J1:OT-A, S5:OT, S5:OT-A                                                                                                                                               |
| 214 | Yes         | 9       | 9-A  | 200    | exp   | Inf | unif   | singleC     | S1:OT, S1:OT-A                                                                                                                                                               |
| 215 | Yes         | 9       | 9-A  | 200    | exp   | Inf | unif   | wholeT_0.01 | J1:CBN, J1:CBN-A, J1:OT, J1:OT-A, S5:CBN, S5:CBN-A                                                                                                                           |
| 216 | Yes         | 9       | 9-A  | 200    | exp   | Inf | unif   | wholeT_0.5  | S1:OT, S1:OT-A                                                                                                                                                               |

Table 14: (continued)

|     | Conjunction | Drivers | Tree | S.Size | Model | sh  | S.Time | S.Type      | Best method(s)                                                                                                                                                               |
|-----|-------------|---------|------|--------|-------|-----|--------|-------------|------------------------------------------------------------------------------------------------------------------------------------------------------------------------------|
| 217 | Yes         | 9       | 9-A  | 200    | McF_4 | 0   | last   | singleC     | J1:DiP-A, J1:OT, J1:OT-A, J5:DiP-A, J5:OT, J5:OT-A, S1:DiP-A, S5:DiP-A, S5:OT, S5:OT-A                                                                                       |
| 218 | Yes         | 9       | 9-A  | 200    | McF_4 | 0   | last   | wholeT_0.01 | J1:DiP, J1:DiP-A, J1:OT, J1:OT-A, J5:DiP, J5:DiP-A, J5:OT, J5:OT-A, S1:DiP, S1:DiP-A, S5:DiP, S5:DiP-A, S5:OT, S5:OT-A                                                       |
| 219 | Yes         | 9       | 9-A  | 200    | McF_4 | 0   | last   | wholeT_0.5  | J1:OT, J1:OT-A, J5:OT, J5:OT-A, S1:DiP-A, S5:DiP-A, S5:OT, S5:OT-A                                                                                                           |
| 220 | Yes         | 9       | 9-A  | 200    | McF_4 | 0   | unif   | singleC     | J1:OT, J1:OT-A, S5:OT, S5:OT-A                                                                                                                                               |
| 221 | Yes         | 9       | 9-A  | 200    | McF_4 | 0   | unif   | wholeT_0.01 | J1:OT, J1:OT-A, S1:DiP, S1:DiP-A, S5:CBN-A, S5:DiP, S5:DiP-A, S5:OT, S5:OT-A                                                                                                 |
| 222 | Yes         | 9       | 9-A  | 200    | McF_4 | 0   | unif   | wholeT_0.5  | J1:OT, J1:OT-A, S5:OT, S5:OT-A                                                                                                                                               |
| 223 | Yes         | 9       | 9-A  | 200    | McF_4 | Inf | last   | singleC     | J1:OT, J5:OT, J5:OT-A, S5:OT, S5:OT-A                                                                                                                                        |
| 224 | Yes         | 9       | 9-A  | 200    | McF_4 | Inf | last   | wholeT_0.01 | J1:DiP-A, J5:OT, S5:DiP-A, S5:OT                                                                                                                                             |
| 225 | Yes         | 9       | 9-A  | 200    | McF_4 | Inf | last   | wholeT_0.5  | J1:OT-A, J5:OT, J5:OT-A, S5:OT, S5:OT-A                                                                                                                                      |
| 226 | Yes         | 9       | 9-A  | 200    | McF_4 | Inf | unif   | singleC     | J1:OT, J1:OT-A, S5:OT, S5:OT-A                                                                                                                                               |
| 227 | Yes         | 9       | 9-A  | 200    | McF_4 | Inf | unif   | wholeT_0.01 | S5:OT, S5:OT-A                                                                                                                                                               |
| 228 | Yes         | 9       | 9-A  | 200    | McF_4 | Inf | unif   | wholeT_0.5  | J1:OT, J1:OT-A, S5:OT, S5:OT-A                                                                                                                                               |
| 229 | Yes         | 9       | 9-A  | 200    | McF_6 | 0   | last   | singleC     | J1:OT, J5:OT, S1:DiP, S5:DiP, S5:OT                                                                                                                                          |
| 230 | Yes         | 9       | 9-A  | 200    | McF_6 | 0   | last   | wholeT_0.01 | J1:DiP, J5:DiP, J5:OT, S1:DiP, S5:DiP, S5:OT                                                                                                                                 |
| 231 | Yes         | 9       | 9-A  | 200    | McF_6 | 0   | last   | wholeT_0.5  | J1:OT, J5:OT, S5:OT                                                                                                                                                          |
| 232 | Yes         | 9       | 9-A  | 200    | McF_6 | 0   | unif   | singleC     | J1:CBN, J1:CBN-A, J1:DiP, J1:DiP-A, J1:OT, J1:OT-A, J5:CBN, J5:CBN-A, J5:DiP, J5:DiP-A, J5:OT, J5:OT-A, S1:DiP, S1:DiP-A, S5:CBN, S5:CBN-A, S5:DiP, S5:DiP-A, S5:OT, S5:OT-A |
| 233 | Yes         | 9       | 9-A  | 200    | McF_6 | 0   | unif   | wholeT_0.01 | J1:CBN, J1:CBN-A, J1:DiP, J1:DiP-A, J1:OT, J1:OT-A, J5:CBN, J5:DiP, J5:DiP-A, J5:OT, J5:OT-A, S1:DiP, S1:DiP-A, S5:DiP, S5:DiP-A, S5:OT, S5:OT-A                             |

Table 14: (continued)

|     | Conjunction | Drivers | Tree | S.Size | Model | sh  | S.Time | S.Type      | Best method(s)                                                                                                                                                               |
|-----|-------------|---------|------|--------|-------|-----|--------|-------------|------------------------------------------------------------------------------------------------------------------------------------------------------------------------------|
| 234 | Yes         | 9       | 9-A  | 200    | McF_6 | 0   | unif   | wholeT_0.5  | J1:CBN, J1:CBN-A, J1:DiP, J1:DiP-A, J1:OT, J1:OT-A, J5:CBN, J5:CBN-A, J5:DiP, J5:DiP-A, J5:OT, J5:OT-A, S1:DiP, S1:DiP-A, S5:CBN, S5:CBN-A, S5:DiP, S5:DiP-A, S5:OT, S5:OT-A |
| 235 | Yes         | 9       | 9-A  | 200    | McF_6 | Inf | last   | singleC     | J1:OT, J5:OT, S5:OT                                                                                                                                                          |
| 236 | Yes         | 9       | 9-A  | 200    | McF_6 | Inf | last   | wholeT_0.01 | J5:OT                                                                                                                                                                        |
| 237 | Yes         | 9       | 9-A  | 200    | McF_6 | Inf | last   | wholeT_0.5  | J1:OT, J5:OT, S5:OT                                                                                                                                                          |
| 238 | Yes         | 9       | 9-A  | 200    | McF_6 | Inf | unif   | singleC     | J1:CBN, J1:CBN-A, J1:DiP, J1:DiP-A, J1:OT, J1:OT-A, J5:CBN, J5:CBN-A, J5:DiP-A, J5:OT, J5:OT-A, S1:DiP, S1:DiP-A, S5:CBN, S5:CBN-A, S5:DiP, S5:DiP-A, S5:OT, S5:OT-A         |
| 239 | Yes         | 9       | 9-A  | 200    | McF_6 | Inf | unif   | wholeT_0.01 | J1:CBN, J1:CBN-A, J1:DiP-A, J1:OT, J1:OT-A, J5:CBN, J5:CBN-A, J5:DiP-A, J5:OT, J5:OT-A, S1:DiP, S5:CBN, S5:CBN-A, S5:DiP, S5:DiP-A, S5:OT, S5:OT-A                           |
| 240 | Yes         | 9       | 9-A  | 200    | McF_6 | Inf | unif   | wholeT_0.5  | J1:CBN, J1:CBN-A, J1:DiP-A, J1:OT, J1:OT-A, J5:CBN, J5:CBN-A, J5:DiP-A, J5:OT, J5:OT-A, S1:DiP, S1:DiP-A, S5:CBN, S5:CBN-A, S5:DiP, S5:DiP-A, S5:OT, S5:OT-A                 |
| 241 | Yes         | 9       | 9-A  | 100    | Bozic | 0   | last   | singleC     | S1:OT, S1:OT-A                                                                                                                                                               |
| 242 | Yes         | 9       | 9-A  | 100    | Bozic | 0   | last   | wholeT_0.01 | J5:OT, J5:OT-A, S5:OT, S5:OT-A                                                                                                                                               |
| 243 | Yes         | 9       | 9-A  | 100    | Bozic | 0   | last   | wholeT_0.5  | S1:OT, S1:OT-A                                                                                                                                                               |
| 244 | Yes         | 9       | 9-A  | 100    | Bozic | 0   | unif   | singleC     | S1:OT, S1:OT-A                                                                                                                                                               |
| 245 | Yes         | 9       | 9-A  | 100    | Bozic | 0   | unif   | wholeT_0.01 | J1:CBN, J1:CBN-A, J1:OT, J1:OT-A, S1:OT, S1:OT-A, S5:CBN                                                                                                                     |
| 246 | Yes         | 9       | 9-A  | 100    | Bozic | 0   | unif   | wholeT_0.5  | S1:CBN, S1:CBN-A, S1:OT, S1:OT-A                                                                                                                                             |
| 247 | Yes         | 9       | 9-A  | 100    | Bozic | Inf | last   | singleC     | S5:OT, S5:OT-A                                                                                                                                                               |
| 248 | Yes         | 9       | 9-A  | 100    | Bozic | Inf | last   | wholeT_0.01 | J5:CBN-A, J5:OT, J5:OT-A                                                                                                                                                     |
| 249 | Yes         | 9       | 9-A  | 100    | Bozic | Inf | last   | wholeT_0.5  | J5:OT, J5:OT-A                                                                                                                                                               |
| 250 | Yes         | 9       | 9-A  | 100    | Bozic | Inf | unif   | singleC     | J1:CBN, J1:CBN-A, J1:OT, J1:OT-A, S1:OT, S1:OT-A                                                                                                                             |
| 251 | Yes         | 9       | 9-A  | 100    | Bozic | Inf | unif   | wholeT_0.01 | S5:OT, S5:OT-A                                                                                                                                                               |
| 252 | Yes         | 9       | 9-A  | 100    | Bozic | Inf | unif   | wholeT_0.5  | J1:CBN, J1:CBN-A, J1:OT, J1:OT-A, S1:OT, S1:OT-A                                                                                                                             |
| 253 | Yes         | 9       | 9-A  | 100    | exp   | 0   | last   | singleC     | S1:OT, S1:OT-A                                                                                                                                                               |
| 254 | Yes         | 9       | 9-A  | 100    | exp   | 0   | last   | wholeT_0.01 | S1:OT, S1:OT-A, S5:OT, S5:OT-A                                                                                                                                               |



Table 14: (continued)

|     | Conjunction | Drivers | Tree | S.Size | Model | sh  | S.Time | S.Type      | Best method(s)                                                                                                |
|-----|-------------|---------|------|--------|-------|-----|--------|-------------|---------------------------------------------------------------------------------------------------------------|
| 255 | Yes         | 9       | 9-A  | 100    | exp   | 0   | last   | wholeT_0.5  | S1:OT, S1:OT-A                                                                                                |
| 256 | Yes         | 9       | 9-A  | 100    | exp   | 0   | unif   | singleC     | S1:CBN, S1:CBN-A                                                                                              |
| 257 | Yes         | 9       | 9-A  | 100    | exp   | 0   | unif   | wholeT_0.01 | J1:CBN, J1:CBN-A, S1:OT, S1:OT-A                                                                              |
| 258 | Yes         | 9       | 9-A  | 100    | exp   | 0   | unif   | wholeT_0.5  | J1:CBN, J1:CBN-A, S1:CBN, S1:CBN-A, S5:CBN-A                                                                  |
| 259 | Yes         | 9       | 9-A  | 100    | exp   | Inf | last   | singleC     | S5:OT, S5:OT-A                                                                                                |
| 260 | Yes         | 9       | 9-A  | 100    | exp   | Inf | last   | wholeT_0.01 | J5:CBN-A, J5:OT, J5:OT-A                                                                                      |
| 261 | Yes         | 9       | 9-A  | 100    | exp   | Inf | last   | wholeT_0.5  | S5:OT, S5:OT-A                                                                                                |
| 262 | Yes         | 9       | 9-A  | 100    | exp   | Inf | unif   | singleC     | J1:CBN, J1:CBN-A, S1:OT, S1:OT-A                                                                              |
| 263 | Yes         | 9       | 9-A  | 100    | exp   | Inf | unif   | wholeT_0.01 | J1:OT, J1:OT-A, S1:OT, S1:OT-A, S5:CBN, S5:CBN-A                                                              |
| 264 | Yes         | 9       | 9-A  | 100    | exp   | Inf | unif   | wholeT_0.5  | J1:CBN-A, S1:OT, S1:OT-A                                                                                      |
| 265 | Yes         | 9       | 9-A  | 100    | McF_4 | 0   | last   | singleC     | J5:OT, J5:OT-A, S5:OT, S5:OT-A                                                                                |
| 266 | Yes         | 9       | 9-A  | 100    | McF_4 | 0   | last   | wholeT_0.01 | J1:DiP-A, J5:DiP, J5:DiP-A, J5:OT, J5:OT-A, S1:DiP, S1:DiP-A, S5:DiP, S5:DiP-A, S5:OT, S5:OT-A                |
| 267 | Yes         | 9       | 9-A  | 100    | McF_4 | 0   | last   | wholeT_0.5  | J5:OT, J5:OT-A, S5:OT, S5:OT-A                                                                                |
| 268 | Yes         | 9       | 9-A  | 100    | McF_4 | 0   | unif   | singleC     | S5:CBN-A, S5:OT, S5:OT-A                                                                                      |
| 269 | Yes         | 9       | 9-A  | 100    | McF_4 | 0   | unif   | wholeT_0.01 | J1:OT, S5:CBN-A, S5:OT, S5:OT-A                                                                               |
| 270 | Yes         | 9       | 9-A  | 100    | McF_4 | 0   | unif   | wholeT_0.5  | J1:OT, J1:OT-A, S5:CBN-A, S5:OT, S5:OT-A                                                                      |
| 271 | Yes         | 9       | 9-A  | 100    | McF_4 | Inf | last   | singleC     | J5:OT, J5:OT-A, S5:OT, S5:OT-A                                                                                |
| 272 | Yes         | 9       | 9-A  | 100    | McF_4 | Inf | last   | wholeT_0.01 | J5:OT, S5:OT                                                                                                  |
| 273 | Yes         | 9       | 9-A  | 100    | McF_4 | Inf | last   | wholeT_0.5  | J5:OT, J5:OT-A, S5:OT, S5:OT-A                                                                                |
| 274 | Yes         | 9       | 9-A  | 100    | McF_4 | Inf | unif   | singleC     | J1:OT, J1:OT-A, S5:OT, S5:OT-A                                                                                |
| 275 | Yes         | 9       | 9-A  | 100    | McF_4 | Inf | unif   | wholeT_0.01 | S5:OT, S5:OT-A                                                                                                |
| 276 | Yes         | 9       | 9-A  | 100    | McF_4 | Inf | unif   | wholeT_0.5  | J1:OT, J1:OT-A, S5:OT, S5:OT-A                                                                                |
| 277 | Yes         | 9       | 9-A  | 100    | McF_6 | 0   | last   | singleC     | J5:OT, S5:OT                                                                                                  |
| 278 | Yes         | 9       | 9-A  | 100    | McF_6 | 0   | last   | wholeT_0.01 | J5:OT, S5:OT                                                                                                  |
| 279 | Yes         | 9       | 9-A  | 100    | McF_6 | 0   | last   | wholeT_0.5  | J5:OT, S5:OT                                                                                                  |
| 280 | Yes         | 9       | 9-A  | 100    | McF_6 | 0   | unif   | singleC     | J1:CBN, J1:CBN-A, J1:OT, J5:CBN, J5:CBN-A, J5:OT, S5:CBN, S5:CBN-A, S5:OT, S5:OT-A                            |
| 281 | Yes         | 9       | 9-A  | 100    | McF_6 | 0   | unif   | wholeT_0.01 | J1:DiP, J1:DiP-A, J1:OT, J5:CBN, J5:CBN-A, J5:OT, J5:OT-A, S5:CBN, S5:CBN-A, S5:DiP, S5:DiP-A, S5:OT, S5:OT-A |
| 282 | Yes         | 9       | 9-A  | 100    | McF_6 | 0   | unif   | wholeT_0.5  | J1:CBN, J1:CBN-A, J1:OT, J1:OT-A, J5:CBN, J5:CBN-A, J5:OT, J5:OT-A, S5:CBN, S5:CBN-A, S5:OT, S5:OT-A          |

Table 14: (continued)

|     | Conjunction | Drivers | Tree | S.Size | Model | sh  | S.Time | S.Type      | Best method(s)                                                                                       |
|-----|-------------|---------|------|--------|-------|-----|--------|-------------|------------------------------------------------------------------------------------------------------|
| 283 | Yes         | 9       | 9-A  | 100    | McF_6 | Inf | last   | singleC     | J1:OT, J5:OT, S5:OT                                                                                  |
| 284 | Yes         | 9       | 9-A  | 100    | McF_6 | Inf | last   | wholeT_0.01 | J5:OT, S5:OT                                                                                         |
| 285 | Yes         | 9       | 9-A  | 100    | McF_6 | Inf | last   | wholeT_0.5  | J5:OT, S5:OT                                                                                         |
| 286 | Yes         | 9       | 9-A  | 100    | McF_6 | Inf | unif   | singleC     | J1:CBN-A, J5:CBN, J5:CBN-A, J5:OT, J5:OT-A, S5:CBN, S5:CBN-A, S5:OT                                  |
| 287 | Yes         | 9       | 9-A  | 100    | McF_6 | Inf | unif   | wholeT_0.01 | J5:CBN-A, J5:OT, S5:CBN, S5:OT                                                                       |
| 288 | Yes         | 9       | 9-A  | 100    | McF_6 | Inf | unif   | wholeT_0.5  | J1:CBN, J1:CBN-A, J1:OT, J1:OT-A, J5:CBN, J5:CBN-A, J5:OT, J5:OT-A, S5:CBN, S5:CBN-A, S5:OT, S5:OT-A |
| 289 | Yes         | 7       | 7-A  | 1000   | Bozic | 0   | last   | singleC     | J1:CBN-A, J1:OT-A, J5:CBN-A, J5:OT-A, S1:OT-A, S5:OT-A                                               |
| 290 | Yes         | 7       | 7-A  | 1000   | Bozic | 0   | last   | wholeT_0.01 | J1:DiP-A, J1:OT-A, J5:DiP-A, J5:OT-A, S1:DiP-A, S1:OT-A, S5:DiP-A, S5:OT-A                           |
| 291 | Yes         | 7       | 7-A  | 1000   | Bozic | 0   | last   | wholeT_0.5  | J1:CBN-A, J1:OT-A, J5:CBN-A, J5:OT-A, S1:OT-A, S5:CBN-A, S5:OT-A                                     |
| 292 | Yes         | 7       | 7-A  | 1000   | Bozic | 0   | unif   | singleC     | J1:CBN, J1:CBN-A, J1:OT, J1:OT-A, S1:CBN, S1:CBN-A, S1:OT, S1:OT-A                                   |
| 293 | Yes         | 7       | 7-A  | 1000   | Bozic | 0   | unif   | wholeT_0.01 | J5:CBN, J5:CBN-A, J5:DiP-A, J5:OT, J5:OT-A                                                           |
| 294 | Yes         | 7       | 7-A  | 1000   | Bozic | 0   | unif   | wholeT_0.5  | NA                                                                                                   |
| 295 | Yes         | 7       | 7-A  | 1000   | Bozic | Inf | last   | singleC     | J1:DiP-A, J1:OT-A, J5:DiP-A, J5:OT-A, S1:DiP-A, S5:DiP-A, S5:OT-A                                    |
| 296 | Yes         | 7       | 7-A  | 1000   | Bozic | Inf | last   | wholeT_0.01 | J5:CBN-A                                                                                             |
| 297 | Yes         | 7       | 7-A  | 1000   | Bozic | Inf | last   | wholeT_0.5  | J1:DiP-A, J1:OT-A, J5:DiP-A, J5:OT-A, S1:DiP-A, S5:DiP-A, S5:OT-A                                    |
| 298 | Yes         | 7       | 7-A  | 1000   | Bozic | Inf | unif   | singleC     | J1:CBN, J1:CBN-A, J5:CBN, J5:CBN-A, J5:OT, J5:OT-A, S1:CBN, S1:CBN-A, S5:CBN, S5:CBN-A, S5:OT        |
| 299 | Yes         | 7       | 7-A  | 1000   | Bozic | Inf | unif   | wholeT_0.01 | J5:CBN, J5:CBN-A, S5:CBN, S5:CBN-A                                                                   |
| 300 | Yes         | 7       | 7-A  | 1000   | Bozic | Inf | unif   | wholeT_0.5  | J1:CBN, J1:CBN-A, S1:CBN, S1:CBN-A                                                                   |
| 301 | Yes         | 7       | 7-A  | 1000   | exp   | 0   | last   | singleC     | J1:CBN-A, J1:OT-A, S1:OT-A                                                                           |
| 302 | Yes         | 7       | 7-A  | 1000   | exp   | 0   | last   | wholeT_0.01 | J1:CBN, J1:CBN-A, J1:OT-A, J5:CBN-A, J5:OT-A, S1:CBN, S1:CBN-A, S1:OT-A, S5:CBN, S5:OT-A             |
| 303 | Yes         | 7       | 7-A  | 1000   | exp   | 0   | last   | wholeT_0.5  | J1:CBN-A, J1:OT-A, S1:OT-A                                                                           |
| 304 | Yes         | 7       | 7-A  | 1000   | exp   | 0   | unif   | singleC     | NA                                                                                                   |
| 305 | Yes         | 7       | 7-A  | 1000   | exp   | 0   | unif   | wholeT_0.01 | J1:CBN                                                                                               |
| 306 | Yes         | 7       | 7-A  | 1000   | exp   | 0   | unif   | wholeT_0.5  | NA                                                                                                   |
| 307 | Yes         | 7       | 7-A  | 1000   | exp   | Inf | last   | singleC     | J1:OT-A, J5:CBN-A, J5:OT-A, S5:OT-A                                                                  |

Table 14: (continued)

|     | Conjunction | Drivers | Tree | S.Size | Model | sh  | S.Time | S.Type      | Best method(s)                                                                                                                                                                 |
|-----|-------------|---------|------|--------|-------|-----|--------|-------------|--------------------------------------------------------------------------------------------------------------------------------------------------------------------------------|
| 308 | Yes         | 7       | 7-A  | 1000   | exp   | Inf | last   | wholeT_0.01 | J1:CBN-A, J5:CBN-A, J5:DiP-A, J5:OT-A, S5:CBN-A, S5:DiP-A, S5:OT-A                                                                                                             |
| 309 | Yes         | 7       | 7-A  | 1000   | exp   | Inf | last   | wholeT_0.5  | J1:OT-A, J5:CBN-A, J5:OT-A, S1:OT-A, S5:OT-A                                                                                                                                   |
| 310 | Yes         | 7       | 7-A  | 1000   | exp   | Inf | unif   | singleC     | J1:CBN, J1:CBN-A, J1:OT, J1:OT-A, S1:CBN-A                                                                                                                                     |
| 311 | Yes         | 7       | 7-A  | 1000   | exp   | Inf | unif   | wholeT_0.01 | J1:CBN, J1:CBN-A, J5:CBN, J5:CBN-A, S5:CBN, S5:CBN-A                                                                                                                           |
| 312 | Yes         | 7       | 7-A  | 1000   | exp   | Inf | unif   | wholeT_0.5  | J1:CBN, J1:CBN-A, J1:OT, J1:OT-A, S1:CBN, S1:CBN-A                                                                                                                             |
| 313 | Yes         | 7       | 7-A  | 1000   | McF_4 | 0   | last   | singleC     | J1:DiP-A, J1:OT-A, J5:DiP-A, J5:OT-A, S1:DiP-A, S1:OT-A, S5:DiP-A, S5:OT-A                                                                                                     |
| 314 | Yes         | 7       | 7-A  | 1000   | McF_4 | 0   | last   | wholeT_0.01 | J1:DiP-A, J1:OT-A, J5:DiP-A, J5:OT-A, S5:OT, S5:OT-A                                                                                                                           |
| 315 | Yes         | 7       | 7-A  | 1000   | McF_4 | 0   | last   | wholeT_0.5  | J1:DiP-A, J1:OT-A, J5:DiP-A, J5:OT-A, S1:DiP-A, S1:OT-A, S5:DiP-A, S5:OT-A                                                                                                     |
| 316 | Yes         | 7       | 7-A  | 1000   | McF_4 | 0   | unif   | singleC     | J1:CBN-A, J1:DiP, J1:DiP-A, J1:OT, J1:OT-A, J5:CBN-A, J5:DiP, J5:DiP-A, J5:OT, J5:OT-A, S1:CBN-A, S1:DiP, S1:DiP-A, S1:OT, S1:OT-A, S5:CBN-A, S5:DiP, S5:DiP-A, S5:OT, S5:OT-A |
| 317 | Yes         | 7       | 7-A  | 1000   | McF_4 | 0   | unif   | wholeT_0.01 | J1:CBN, J1:DiP, J1:DiP-A, J1:OT, J1:OT-A, J5:CBN, J5:DiP, J5:DiP-A, J5:OT, J5:OT-A, S1:DiP, S1:DiP-A, S5:CBN, S5:DiP, S5:DiP-A, S5:OT, S5:OT-A                                 |
| 318 | Yes         | 7       | 7-A  | 1000   | McF_4 | 0   | unif   | wholeT_0.5  | J1:CBN-A, J1:DiP, J1:DiP-A, J1:OT, J1:OT-A, J5:CBN-A, J5:DiP, J5:DiP-A, J5:OT, J5:OT-A, S1:CBN-A, S1:DiP, S1:DiP-A, S1:OT, S1:OT-A, S5:CBN-A, S5:DiP, S5:DiP-A, S5:OT, S5:OT-A |
| 319 | Yes         | 7       | 7-A  | 1000   | McF_4 | Inf | last   | singleC     | J1:DiP-A, J1:OT-A, J5:DiP-A, J5:OT-A, S1:DiP-A, S5:DiP-A, S5:OT-A                                                                                                              |
| 320 | Yes         | 7       | 7-A  | 1000   | McF_4 | Inf | last   | wholeT_0.01 | J1:DiP-A, J5:DiP-A, J5:OT-A, S5:DiP-A, S5:OT-A                                                                                                                                 |
| 321 | Yes         | 7       | 7-A  | 1000   | McF_4 | Inf | last   | wholeT_0.5  | J1:DiP-A, J1:OT-A, J5:DiP-A, J5:OT-A, S1:DiP-A, S1:OT-A, S5:DiP-A, S5:OT-A                                                                                                     |
| 322 | Yes         | 7       | 7-A  | 1000   | McF_4 | Inf | unif   | singleC     | J1:OT, J1:OT-A, J5:OT, J5:OT-A, S1:DiP-A, S1:OT, S1:OT-A, S5:OT, S5:OT-A                                                                                                       |

Table 14: (continued)

|     | Conjunction | Drivers | Tree | S.Size | Model | sh  | S.Time | S.Type      | Best method(s)                                                                                                                                                                                 |
|-----|-------------|---------|------|--------|-------|-----|--------|-------------|------------------------------------------------------------------------------------------------------------------------------------------------------------------------------------------------|
| 323 | Yes         | 7       | 7-A  | 1000   | McF_4 | Inf | unif   | wholeT_0.01 | J1:DiP-A, J1:OT, J1:OT-A, J5:DiP-A, J5:OT, J5:OT-A, S1:DiP-A, S5:DiP-A, S5:OT, S5:OT-A                                                                                                         |
| 324 | Yes         | 7       | 7-A  | 1000   | McF_4 | Inf | unif   | wholeT_0.5  | J1:DiP-A, J1:OT, J1:OT-A, J5:DiP-A, J5:OT, J5:OT-A, S1:DiP-A, S1:OT, S1:OT-A, S5:DiP-A, S5:OT, S5:OT-A                                                                                         |
| 325 | Yes         | 7       | 7-A  | 1000   | McF_6 | 0   | last   | singleC     | J1:DiP, J1:OT, J1:OT-A, J5:DiP, J5:OT, J5:OT-A, S1:DiP, S5:DiP, S5:OT, S5:OT-A                                                                                                                 |
| 326 | Yes         | 7       | 7-A  | 1000   | McF_6 | 0   | last   | wholeT_0.01 | J1:DiP, J1:OT, J1:OT-A, J5:DiP, J5:OT, J5:OT-A, S1:DiP, S5:DiP, S5:OT, S5:OT-A                                                                                                                 |
| 327 | Yes         | 7       | 7-A  | 1000   | McF_6 | 0   | last   | wholeT_0.5  | J1:DiP, J1:OT, J1:OT-A, J5:DiP, J5:OT, J5:OT-A, S1:DiP, S5:DiP, S5:OT, S5:OT-A                                                                                                                 |
| 328 | Yes         | 7       | 7-A  | 1000   | McF_6 | 0   | unif   | singleC     | none                                                                                                                                                                                           |
| 329 | Yes         | 7       | 7-A  | 1000   | McF_6 | 0   | unif   | wholeT_0.01 | J1:CBN, J1:CBN-A, J1:DiP, J1:DiP-A, J1:OT, J1:OT-A, J5:CBN-A, J5:DiP, J5:DiP-A, J5:OT, J5:OT-A, S5:CBN, S5:CBN-A, S5:DiP, S5:DiP-A, S5:OT, S5:OT-A                                             |
| 330 | Yes         | 7       | 7-A  | 1000   | McF_6 | 0   | unif   | wholeT_0.5  | none                                                                                                                                                                                           |
| 331 | Yes         | 7       | 7-A  | 1000   | McF_6 | Inf | last   | singleC     | J1:DiP, J1:OT, J1:OT-A, J5:DiP, J5:OT, J5:OT-A, S1:DiP, S5:DiP, S5:DiP-A, S5:OT, S5:OT-A                                                                                                       |
| 332 | Yes         | 7       | 7-A  | 1000   | McF_6 | Inf | last   | wholeT_0.01 | J5:OT, J5:OT-A, S5:OT, S5:OT-A                                                                                                                                                                 |
| 333 | Yes         | 7       | 7-A  | 1000   | McF_6 | Inf | last   | wholeT_0.5  | J1:DiP, J1:OT, J1:OT-A, J5:DiP, J5:OT, J5:OT-A, S1:DiP, S5:DiP, S5:OT, S5:OT-A                                                                                                                 |
| 334 | Yes         | 7       | 7-A  | 1000   | McF_6 | Inf | unif   | singleC     | J1:CBN, J1:CBN-A, J1:DiP, J1:DiP-A, J1:OT, J1:OT-A, J5:CBN-A, J5:DiP-A, J5:OT, J5:OT-A, S1:CBN, S1:CBN-A, S1:DiP, S1:DiP-A, S1:OT, S1:OT-A, S5:CBN, S5:CBN-A, S5:DiP, S5:DiP-A, S5:OT, S5:OT-A |
| 335 | Yes         | 7       | 7-A  | 1000   | McF_6 | Inf | unif   | wholeT_0.01 | J1:CBN, J1:CBN-A, J1:DiP, J1:DiP-A, J1:OT, J1:OT-A, J5:DiP-A, J5:OT, J5:OT-A, S5:CBN, S5:CBN-A, S5:DiP, S5:DiP-A, S5:OT, S5:OT-A                                                               |

Table 14: (continued)

|     | Conjunction | Drivers | Tree | S.Size | Model | sh  | S.Time | S.Type      | Best method(s)                                                                                                                                                                         |
|-----|-------------|---------|------|--------|-------|-----|--------|-------------|----------------------------------------------------------------------------------------------------------------------------------------------------------------------------------------|
| 336 | Yes         | 7       | 7-A  | 1000   | McF_6 | Inf | unif   | wholeT_0.5  | J1:CBN, J1:CBN-A, J1:DiP, J1:DiP-A, J1:OT, J1:OT-A, J5:CBN-A, J5:DiP-A, J5:OT, J5:OT-A, S1:CBN-A, S1:DiP, S1:DiP-A, S1:OT, S1:OT-A, S5:CBN, S5:CBN-A, S5:DiP, S5:DiP-A, S5:OT, S5:OT-A |
| 337 | Yes         | 7       | 7-A  | 200    | Bozic | 0   | last   | singleC     | J1:CBN-A, J1:OT-A, J5:CBN-A, J5:OT-A, S1:OT-A, S5:OT-A                                                                                                                                 |
| 338 | Yes         | 7       | 7-A  | 200    | Bozic | 0   | last   | wholeT_0.01 | J1:OT-A, J5:OT-A, S5:OT-A                                                                                                                                                              |
| 339 | Yes         | 7       | 7-A  | 200    | Bozic | 0   | last   | wholeT_0.5  | J1:CBN-A, J1:OT-A, J5:CBN-A, J5:OT-A, S5:CBN-A, S5:OT-A                                                                                                                                |
| 340 | Yes         | 7       | 7-A  | 200    | Bozic | 0   | unif   | singleC     | J1:CBN, J1:CBN-A, J1:OT, J1:OT-A, S1:CBN, S1:OT, S1:OT-A                                                                                                                               |
| 341 | Yes         | 7       | 7-A  | 200    | Bozic | 0   | unif   | wholeT_0.01 | J5:CBN, J5:OT, J5:OT-A                                                                                                                                                                 |
| 342 | Yes         | 7       | 7-A  | 200    | Bozic | 0   | unif   | wholeT_0.5  | J1:CBN, J1:CBN-A, J1:OT, J1:OT-A, S1:CBN, S1:CBN-A, S1:OT, S1:OT-A                                                                                                                     |
| 343 | Yes         | 7       | 7-A  | 200    | Bozic | Inf | last   | singleC     | J5:CBN, J5:OT-A, S5:OT-A                                                                                                                                                               |
| 344 | Yes         | 7       | 7-A  | 200    | Bozic | Inf | last   | wholeT_0.01 | J5:CBN-A, J5:OT-A                                                                                                                                                                      |
| 345 | Yes         | 7       | 7-A  | 200    | Bozic | Inf | last   | wholeT_0.5  | J5:OT-A, S5:OT-A                                                                                                                                                                       |
| 346 | Yes         | 7       | 7-A  | 200    | Bozic | Inf | unif   | singleC     | J1:CBN, J1:CBN-A, J5:CBN, J5:CBN-A, J5:OT, J5:OT-A, S5:CBN, S5:CBN-A, S5:OT-A                                                                                                          |
| 347 | Yes         | 7       | 7-A  | 200    | Bozic | Inf | unif   | wholeT_0.01 | J5:CBN, J5:CBN-A, J5:OT-A, S5:CBN, S5:CBN-A, S5:OT-A                                                                                                                                   |
| 348 | Yes         | 7       | 7-A  | 200    | Bozic | Inf | unif   | wholeT_0.5  | J1:CBN, J1:CBN-A                                                                                                                                                                       |
| 349 | Yes         | 7       | 7-A  | 200    | exp   | 0   | last   | singleC     | J1:CBN-A, J1:OT-A, S1:OT-A                                                                                                                                                             |
| 350 | Yes         | 7       | 7-A  | 200    | exp   | 0   | last   | wholeT_0.01 | J1:CBN, J1:CBN-A, J1:OT-A, J5:CBN-A, J5:OT-A, S1:CBN, S1:CBN-A, S1:OT-A, S5:CBN, S5:OT-A                                                                                               |
| 351 | Yes         | 7       | 7-A  | 200    | exp   | 0   | last   | wholeT_0.5  | J1:OT-A, S1:OT-A                                                                                                                                                                       |
| 352 | Yes         | 7       | 7-A  | 200    | exp   | 0   | unif   | singleC     | NA                                                                                                                                                                                     |
| 353 | Yes         | 7       | 7-A  | 200    | exp   | 0   | unif   | wholeT_0.01 | J1:CBN, J1:CBN-A, J1:OT, J1:OT-A, S1:OT                                                                                                                                                |
| 354 | Yes         | 7       | 7-A  | 200    | exp   | 0   | unif   | wholeT_0.5  | NA                                                                                                                                                                                     |
| 355 | Yes         | 7       | 7-A  | 200    | exp   | Inf | last   | singleC     | J1:OT-A, J5:CBN-A, J5:OT-A, S5:OT-A                                                                                                                                                    |
| 356 | Yes         | 7       | 7-A  | 200    | exp   | Inf | last   | wholeT_0.01 | J5:CBN-A, J5:OT-A, S5:CBN-A                                                                                                                                                            |
| 357 | Yes         | 7       | 7-A  | 200    | exp   | Inf | last   | wholeT_0.5  | J1:OT-A, J5:CBN-A, J5:OT-A, S5:OT-A                                                                                                                                                    |
| 358 | Yes         | 7       | 7-A  | 200    | exp   | Inf | unif   | singleC     | J1:CBN, J1:CBN-A, J1:OT, J1:OT-A                                                                                                                                                       |
| 359 | Yes         | 7       | 7-A  | 200    | exp   | Inf | unif   | wholeT_0.01 | J5:CBN, J5:CBN-A, J5:OT, J5:OT-A, S5:CBN, S5:CBN-A                                                                                                                                     |

Table 14: (continued)

|     | Conjunction | Drivers | Tree | S.Size | Model | sh  | S.Time | S.Type      | Best method(s)                                                                                                                                                   |
|-----|-------------|---------|------|--------|-------|-----|--------|-------------|------------------------------------------------------------------------------------------------------------------------------------------------------------------|
| 360 | Yes         | 7       | 7-A  | 200    | exp   | Inf | unif   | wholeT_0.5  | J1:CBN, J1:CBN-A, J1:OT, J1:OT-A                                                                                                                                 |
| 361 | Yes         | 7       | 7-A  | 200    | McF_4 | 0   | last   | singleC     | J1:OT-A, J5:OT-A, S5:OT-A                                                                                                                                        |
| 362 | Yes         | 7       | 7-A  | 200    | McF_4 | 0   | last   | wholeT_0.01 | J5:OT-A, S5:OT-A                                                                                                                                                 |
| 363 | Yes         | 7       | 7-A  | 200    | McF_4 | 0   | last   | wholeT_0.5  | J1:OT-A, J5:OT-A, S5:OT-A                                                                                                                                        |
| 364 | Yes         | 7       | 7-A  | 200    | McF_4 | 0   | unif   | singleC     | J1:CBN, J1:CBN-A, J1:OT, J1:OT-A,<br>J5:CBN, J5:CBN-A, J5:OT, J5:OT-A,<br>S5:CBN, S5:CBN-A, S5:OT, S5:OT-A                                                       |
| 365 | Yes         | 7       | 7-A  | 200    | McF_4 | 0   | unif   | wholeT_0.01 | J1:CBN, J1:CBN-A, J1:DiP-A, J1:OT,<br>J1:OT-A, J5:CBN, J5:DiP-A, J5:OT,<br>J5:OT-A, S1:DiP-A, S5:CBN, S5:CBN-A,<br>S5:DiP-A, S5:OT, S5:OT-A                      |
| 366 | Yes         | 7       | 7-A  | 200    | McF_4 | 0   | unif   | wholeT_0.5  | J1:CBN-A, J1:OT, J1:OT-A, J5:CBN,<br>J5:CBN-A, J5:OT, J5:OT-A, S5:CBN-A,<br>S5:OT, S5:OT-A                                                                       |
| 367 | Yes         | 7       | 7-A  | 200    | McF_4 | Inf | last   | singleC     | J1:OT-A, J5:OT-A, S5:OT-A                                                                                                                                        |
| 368 | Yes         | 7       | 7-A  | 200    | McF_4 | Inf | last   | wholeT_0.01 | J5:OT-A, S5:OT-A                                                                                                                                                 |
| 369 | Yes         | 7       | 7-A  | 200    | McF_4 | Inf | last   | wholeT_0.5  | J1:OT-A, J5:OT-A, S5:OT-A                                                                                                                                        |
| 370 | Yes         | 7       | 7-A  | 200    | McF_4 | Inf | unif   | singleC     | J1:OT, J1:OT-A, J5:CBN-A, J5:OT,<br>J5:OT-A, S5:OT, S5:OT-A                                                                                                      |
| 371 | Yes         | 7       | 7-A  | 200    | McF_4 | Inf | unif   | wholeT_0.01 | J1:OT, J1:OT-A, J5:OT, J5:OT-A,<br>S5:OT, S5:OT-A                                                                                                                |
| 372 | Yes         | 7       | 7-A  | 200    | McF_4 | Inf | unif   | wholeT_0.5  | J1:OT, J1:OT-A, J5:OT, J5:OT-A,<br>S5:OT, S5:OT-A                                                                                                                |
| 373 | Yes         | 7       | 7-A  | 200    | McF_6 | 0   | last   | singleC     | J1:OT, J5:OT, J5:OT-A, S5:OT, S5:OT-A                                                                                                                            |
| 374 | Yes         | 7       | 7-A  | 200    | McF_6 | 0   | last   | wholeT_0.01 | J5:OT, J5:OT-A, S5:OT, S5:OT-A                                                                                                                                   |
| 375 | Yes         | 7       | 7-A  | 200    | McF_6 | 0   | last   | wholeT_0.5  | J1:OT-A, J5:OT, J5:OT-A, S5:OT,<br>S5:OT-A                                                                                                                       |
| 376 | Yes         | 7       | 7-A  | 200    | McF_6 | 0   | unif   | singleC     | J1:CBN, J1:CBN-A, J1:DiP-A, J1:OT,<br>J1:OT-A, J5:CBN, J5:CBN-A, S1:DiP-A,<br>S5:CBN, S5:CBN-A, S5:DiP-A, S5:OT                                                  |
| 377 | Yes         | 7       | 7-A  | 200    | McF_6 | 0   | unif   | wholeT_0.01 | J1:CBN, J1:CBN-A, J1:DiP-A, J1:OT,<br>J1:OT-A, J5:CBN, J5:CBN-A, J5:DiP-A,<br>J5:OT, J5:OT-A, S1:DiP, S1:DiP-A,<br>S5:CBN, S5:CBN-A, S5:DiP-A, S5:OT,<br>S5:OT-A |
| 378 | Yes         | 7       | 7-A  | 200    | McF_6 | 0   | unif   | wholeT_0.5  | J1:CBN, J1:CBN-A, J5:CBN, J5:CBN-A,<br>S5:CBN, S5:CBN-A                                                                                                          |
| 379 | Yes         | 7       | 7-A  | 200    | McF_6 | Inf | last   | singleC     | J1:DiP-A, J5:DiP-A, J5:OT, J5:OT-A,<br>S5:DiP-A, S5:OT, S5:OT-A                                                                                                  |

Table 14: (continued)

|     | Conjunction | Drivers | Tree | S.Size | Model | sh  | S.Time | S.Type      | Best method(s)                                                                        |
|-----|-------------|---------|------|--------|-------|-----|--------|-------------|---------------------------------------------------------------------------------------|
| 380 | Yes         | 7       | 7-A  | 200    | McF_6 | Inf | last   | wholeT_0.01 | J5:OT, J5:OT-A, S5:OT-A                                                               |
| 381 | Yes         | 7       | 7-A  | 200    | McF_6 | Inf | last   | wholeT_0.5  | J1:DiP-A, J1:OT, J5:DiP-A, J5:OT, J5:OT-A, S5:DiP-A, S5:OT, S5:OT-A                   |
| 382 | Yes         | 7       | 7-A  | 200    | McF_6 | Inf | unif   | singleC     | J1:CBN, J1:CBN-A, J1:OT, J1:OT-A, J5:CBN-A, J5:OT-A, S5:CBN, S5:CBN-A, S5:OT, S5:OT-A |
| 383 | Yes         | 7       | 7-A  | 200    | McF_6 | Inf | unif   | wholeT_0.01 | J1:CBN, J1:CBN-A, J5:CBN-A, J5:OT-A, S5:CBN, S5:CBN-A, S5:OT-A                        |
| 384 | Yes         | 7       | 7-A  | 200    | McF_6 | Inf | unif   | wholeT_0.5  | J1:CBN, J1:CBN-A, J5:CBN-A, S5:CBN, S5:CBN-A                                          |
| 385 | Yes         | 7       | 7-A  | 100    | Bozic | 0   | last   | singleC     | J1:CBN-A, J5:CBN-A, J5:OT-A, S5:CBN, S5:OT-A                                          |
| 386 | Yes         | 7       | 7-A  | 100    | Bozic | 0   | last   | wholeT_0.01 | J5:OT-A, S5:OT-A                                                                      |
| 387 | Yes         | 7       | 7-A  | 100    | Bozic | 0   | last   | wholeT_0.5  | J5:OT-A, S5:CBN-A, S5:OT-A                                                            |
| 388 | Yes         | 7       | 7-A  | 100    | Bozic | 0   | unif   | singleC     | J1:CBN, J1:CBN-A, J1:OT, J1:OT-A, S1:OT, S1:OT-A                                      |
| 389 | Yes         | 7       | 7-A  | 100    | Bozic | 0   | unif   | wholeT_0.01 | J1:CBN-A, J5:CBN, J5:CBN-A, J5:OT, J5:OT-A, S5:CBN, S5:CBN-A                          |
| 390 | Yes         | 7       | 7-A  | 100    | Bozic | 0   | unif   | wholeT_0.5  | J1:CBN, J1:CBN-A, J1:OT, J1:OT-A, S1:OT, S1:OT-A                                      |
| 391 | Yes         | 7       | 7-A  | 100    | Bozic | Inf | last   | singleC     | J5:CBN, J5:OT-A                                                                       |
| 392 | Yes         | 7       | 7-A  | 100    | Bozic | Inf | last   | wholeT_0.01 | J5:CBN-A, J5:OT-A                                                                     |
| 393 | Yes         | 7       | 7-A  | 100    | Bozic | Inf | last   | wholeT_0.5  | J5:OT-A                                                                               |
| 394 | Yes         | 7       | 7-A  | 100    | Bozic | Inf | unif   | singleC     | J5:CBN, J5:CBN-A, J5:OT, J5:OT-A, S5:CBN, S5:CBN-A                                    |
| 395 | Yes         | 7       | 7-A  | 100    | Bozic | Inf | unif   | wholeT_0.01 | J5:CBN, J5:CBN-A, J5:OT, J5:OT-A, S5:CBN-A, S5:OT, S5:OT-A                            |
| 396 | Yes         | 7       | 7-A  | 100    | Bozic | Inf | unif   | wholeT_0.5  | J5:CBN, J5:CBN-A, J5:OT, J5:OT-A, S5:CBN, S5:CBN-A                                    |
| 397 | Yes         | 7       | 7-A  | 100    | exp   | 0   | last   | singleC     | J1:OT-A, S1:OT-A                                                                      |
| 398 | Yes         | 7       | 7-A  | 100    | exp   | 0   | last   | wholeT_0.01 | J1:CBN, J1:CBN-A, J5:CBN-A, J5:OT-A, S1:CBN, S5:CBN                                   |
| 399 | Yes         | 7       | 7-A  | 100    | exp   | 0   | last   | wholeT_0.5  | J1:OT-A, S1:OT-A                                                                      |
| 400 | Yes         | 7       | 7-A  | 100    | exp   | 0   | unif   | singleC     | J1:OT, J1:OT-A, S1:CBN, S1:CBN-A, S1:OT, S1:OT-A                                      |
| 401 | Yes         | 7       | 7-A  | 100    | exp   | 0   | unif   | wholeT_0.01 | J1:CBN, J1:CBN-A, J1:OT, J1:OT-A, S1:CBN, S1:CBN-A, S1:OT, S1:OT-A                    |
| 402 | Yes         | 7       | 7-A  | 100    | exp   | 0   | unif   | wholeT_0.5  | NA                                                                                    |
| 403 | Yes         | 7       | 7-A  | 100    | exp   | Inf | last   | singleC     | J1:OT-A, J5:OT-A, S5:OT-A                                                             |
| 404 | Yes         | 7       | 7-A  | 100    | exp   | Inf | last   | wholeT_0.01 | J5:CBN, J5:CBN-A, J5:OT-A                                                             |

Table 14: (continued)

|     | Conjunction | Drivers | Tree | S.Size | Model | sh  | S.Time | S.Type      | Best method(s)                                                                               |
|-----|-------------|---------|------|--------|-------|-----|--------|-------------|----------------------------------------------------------------------------------------------|
| 405 | Yes         | 7       | 7-A  | 100    | exp   | Inf | last   | wholeT_0.5  | J1:CBN, J1:OT-A, J5:CBN-A, J5:OT-A, S5:OT-A                                                  |
| 406 | Yes         | 7       | 7-A  | 100    | exp   | Inf | unif   | singleC     | J1:CBN, J1:CBN-A, J1:OT, J1:OT-A                                                             |
| 407 | Yes         | 7       | 7-A  | 100    | exp   | Inf | unif   | wholeT_0.01 | J5:CBN, J5:CBN-A, J5:OT, J5:OT-A, S5:CBN, S5:CBN-A, S5:OT, S5:OT-A                           |
| 408 | Yes         | 7       | 7-A  | 100    | exp   | Inf | unif   | wholeT_0.5  | J1:CBN, J1:CBN-A, J1:OT, J1:OT-A, S1:OT, S1:OT-A                                             |
| 409 | Yes         | 7       | 7-A  | 100    | McF_4 | 0   | last   | singleC     | J5:OT-A, S5:OT-A                                                                             |
| 410 | Yes         | 7       | 7-A  | 100    | McF_4 | 0   | last   | wholeT_0.01 | J5:OT-A, S5:OT-A                                                                             |
| 411 | Yes         | 7       | 7-A  | 100    | McF_4 | 0   | last   | wholeT_0.5  | J1:OT-A, J5:OT-A, S5:OT-A                                                                    |
| 412 | Yes         | 7       | 7-A  | 100    | McF_4 | 0   | unif   | singleC     | J1:CBN, J1:CBN-A, J1:OT, J1:OT-A, J5:CBN, J5:CBN-A, J5:OT, J5:OT-A, S5:CBN-A, S5:OT, S5:OT-A |
| 413 | Yes         | 7       | 7-A  | 100    | McF_4 | 0   | unif   | wholeT_0.01 | J1:CBN-A, J1:OT, J1:OT-A, J5:CBN, J5:CBN-A, J5:OT, J5:OT-A, S5:CBN-A, S5:OT, S5:OT-A         |
| 414 | Yes         | 7       | 7-A  | 100    | McF_4 | 0   | unif   | wholeT_0.5  | J1:CBN-A, J1:OT, J1:OT-A, J5:CBN, J5:CBN-A, J5:OT, J5:OT-A, S5:CBN, S5:CBN-A, S5:OT, S5:OT-A |
| 415 | Yes         | 7       | 7-A  | 100    | McF_4 | Inf | last   | singleC     | J5:OT-A, S5:OT-A                                                                             |
| 416 | Yes         | 7       | 7-A  | 100    | McF_4 | Inf | last   | wholeT_0.01 | J5:OT-A, S5:OT-A                                                                             |
| 417 | Yes         | 7       | 7-A  | 100    | McF_4 | Inf | last   | wholeT_0.5  | J5:OT-A, S5:OT-A                                                                             |
| 418 | Yes         | 7       | 7-A  | 100    | McF_4 | Inf | unif   | singleC     | J1:OT, J1:OT-A, J5:OT, J5:OT-A, S5:CBN-A, S5:OT, S5:OT-A                                     |
| 419 | Yes         | 7       | 7-A  | 100    | McF_4 | Inf | unif   | wholeT_0.01 | J1:CBN-A, J1:OT, J1:OT-A, J5:CBN-A, J5:OT-A, S5:CBN-A, S5:OT, S5:OT-A                        |
| 420 | Yes         | 7       | 7-A  | 100    | McF_4 | Inf | unif   | wholeT_0.5  | J1:OT-A, J5:CBN-A, J5:OT, J5:OT-A, S5:OT                                                     |
| 421 | Yes         | 7       | 7-A  | 100    | McF_6 | 0   | last   | singleC     | J5:OT, J5:OT-A, S5:OT, S5:OT-A                                                               |
| 422 | Yes         | 7       | 7-A  | 100    | McF_6 | 0   | last   | wholeT_0.01 | J5:OT, J5:OT-A, S5:OT, S5:OT-A                                                               |
| 423 | Yes         | 7       | 7-A  | 100    | McF_6 | 0   | last   | wholeT_0.5  | J5:OT, J5:OT-A, S5:OT, S5:OT-A                                                               |
| 424 | Yes         | 7       | 7-A  | 100    | McF_6 | 0   | unif   | singleC     | J1:CBN, J1:CBN-A, J5:CBN, J5:CBN-A, S5:CBN, S5:CBN-A                                         |
| 425 | Yes         | 7       | 7-A  | 100    | McF_6 | 0   | unif   | wholeT_0.01 | J1:DiP-A, J5:CBN, J5:CBN-A, J5:DiP-A, J5:OT, J5:OT-A, S1:DiP-A, S5:CBN, S5:CBN-A, S5:DiP-A   |
| 426 | Yes         | 7       | 7-A  | 100    | McF_6 | 0   | unif   | wholeT_0.5  | J1:CBN, J1:CBN-A, J5:CBN, J5:CBN-A, S5:CBN, S5:CBN-A                                         |
| 427 | Yes         | 7       | 7-A  | 100    | McF_6 | Inf | last   | singleC     | J5:OT, J5:OT-A, S5:OT, S5:OT-A                                                               |
| 428 | Yes         | 7       | 7-A  | 100    | McF_6 | Inf | last   | wholeT_0.01 | J5:OT, J5:OT-A, S5:OT                                                                        |



Table 14: (continued)

|     | Conjunction | Drivers | Tree | S.Size | Model | sh  | S.Time | S.Type      | Best method(s)                                                                                       |
|-----|-------------|---------|------|--------|-------|-----|--------|-------------|------------------------------------------------------------------------------------------------------|
| 429 | Yes         | 7       | 7-A  | 100    | McF_6 | Inf | last   | wholeT_0.5  | J5:OT, J5:OT-A, S5:OT, S5:OT-A                                                                       |
| 430 | Yes         | 7       | 7-A  | 100    | McF_6 | Inf | unif   | singleC     | J1:CBN, J5:CBN, J5:CBN-A, S5:CBN, S5:CBN-A                                                           |
| 431 | Yes         | 7       | 7-A  | 100    | McF_6 | Inf | unif   | wholeT_0.01 | J5:CBN, J5:CBN-A, S5:CBN, S5:CBN-A                                                                   |
| 432 | Yes         | 7       | 7-A  | 100    | McF_6 | Inf | unif   | wholeT_0.5  | J1:CBN, J1:CBN-A, J5:CBN, J5:CBN-A, S5:CBN, S5:CBN-A                                                 |
| 433 | No          | 11      | 11-B | 1000   | Bozic | 0   | last   | singleC     | S1:OT, S1:OT-A, S5:DiP-A, S5:OT, S5:OT-A                                                             |
| 434 | No          | 11      | 11-B | 1000   | Bozic | 0   | last   | wholeT_0.01 | J1:DiP, J1:DiP-A, J5:DiP, J5:DiP-A, S1:DiP, S1:DiP-A, S5:DiP, S5:DiP-A                               |
| 435 | No          | 11      | 11-B | 1000   | Bozic | 0   | last   | wholeT_0.5  | S1:OT, S1:OT-A                                                                                       |
| 436 | No          | 11      | 11-B | 1000   | Bozic | 0   | unif   | singleC     | S1:CBN, S1:CBN-A                                                                                     |
| 437 | No          | 11      | 11-B | 1000   | Bozic | 0   | unif   | wholeT_0.01 | S5:CBN-A, S5:DiP-A, S5:OT, S5:OT-A                                                                   |
| 438 | No          | 11      | 11-B | 1000   | Bozic | 0   | unif   | wholeT_0.5  | S1:CBN, S1:CBN-A, S5:CBN, S5:CBN-A                                                                   |
| 439 | No          | 11      | 11-B | 1000   | Bozic | Inf | last   | singleC     | J1:DiP, J1:DiP-A, J1:OT, J1:OT-A, J5:DiP, J5:DiP-A, J5:OT, J5:OT-A, S5:DiP, S5:DiP-A, S5:OT, S5:OT-A |
| 440 | No          | 11      | 11-B | 1000   | Bozic | Inf | last   | wholeT_0.01 | J5:DiP, J5:DiP-A, J5:OT, J5:OT-A                                                                     |
| 441 | No          | 11      | 11-B | 1000   | Bozic | Inf | last   | wholeT_0.5  | J1:DiP, J1:OT, J1:OT-A, J5:DiP-A, J5:OT, J5:OT-A, S5:DiP, S5:DiP-A, S5:OT, S5:OT-A                   |
| 442 | No          | 11      | 11-B | 1000   | Bozic | Inf | unif   | singleC     | J1:CBN, S1:CBN, S1:CBN-A, S1:DiP, S1:DiP-A, S1:OT, S1:OT-A                                           |
| 443 | No          | 11      | 11-B | 1000   | Bozic | Inf | unif   | wholeT_0.01 | J1:CBN-A, J1:DiP-A, J1:OT, J1:OT-A, S5:CBN, S5:CBN-A, S5:DiP, S5:DiP-A, S5:OT, S5:OT-A               |
| 444 | No          | 11      | 11-B | 1000   | Bozic | Inf | unif   | wholeT_0.5  | J1:CBN, J1:CBN-A, S1:CBN, S1:CBN-A, S1:DiP-A, S1:OT, S1:OT-A                                         |
| 445 | No          | 11      | 11-B | 1000   | exp   | 0   | last   | singleC     | S1:OT, S1:OT-A                                                                                       |
| 446 | No          | 11      | 11-B | 1000   | exp   | 0   | last   | wholeT_0.01 | J1:DiP, J1:DiP-A, J1:OT, J1:OT-A, S1:OT, S1:OT-A, S5:DiP, S5:DiP-A, S5:OT, S5:OT-A                   |
| 447 | No          | 11      | 11-B | 1000   | exp   | 0   | last   | wholeT_0.5  | S1:OT, S1:OT-A                                                                                       |
| 448 | No          | 11      | 11-B | 1000   | exp   | 0   | unif   | singleC     | S1:CBN, S1:CBN-A, S5:CBN, S5:CBN-A                                                                   |
| 449 | No          | 11      | 11-B | 1000   | exp   | 0   | unif   | wholeT_0.01 | S1:DiP, S1:DiP-A, S1:OT, S1:OT-A                                                                     |
| 450 | No          | 11      | 11-B | 1000   | exp   | 0   | unif   | wholeT_0.5  | S1:CBN, S1:CBN-A, S5:CBN-A                                                                           |
| 451 | No          | 11      | 11-B | 1000   | exp   | Inf | last   | singleC     | J1:DiP, J1:DiP-A, J1:OT, J1:OT-A, S1:DiP-A, S5:DiP, S5:DiP-A, S5:OT, S5:OT-A                         |

Table 14: (continued)

|     | Conjunction | Drivers | Tree | S.Size | Model | sh  | S.Time | S.Type      | Best method(s)                                                                                                                        |
|-----|-------------|---------|------|--------|-------|-----|--------|-------------|---------------------------------------------------------------------------------------------------------------------------------------|
| 452 | No          | 11      | 11-B | 1000   | exp   | Inf | last   | wholeT_0.01 | J5:DiP, J5:DiP-A, J5:OT, J5:OT-A, S5:DiP, S5:DiP-A, S5:OT, S5:OT-A                                                                    |
| 453 | No          | 11      | 11-B | 1000   | exp   | Inf | last   | wholeT_0.5  | J1:DiP, J1:DiP-A, J1:OT, J1:OT-A, S5:DiP, S5:DiP-A, S5:OT, S5:OT-A                                                                    |
| 454 | No          | 11      | 11-B | 1000   | exp   | Inf | unif   | singleC     | S1:CBN, S1:CBN-A, S1:OT, S1:OT-A                                                                                                      |
| 455 | No          | 11      | 11-B | 1000   | exp   | Inf | unif   | wholeT_0.01 | J1:DiP, J1:DiP-A, J1:OT, J1:OT-A                                                                                                      |
| 456 | No          | 11      | 11-B | 1000   | exp   | Inf | unif   | wholeT_0.5  | S1:CBN-A, S1:OT, S1:OT-A                                                                                                              |
| 457 | No          | 11      | 11-B | 1000   | McF_4 | 0   | last   | singleC     | J1:CBN, J1:DiP, J1:DiP-A, J1:OT, J5:CBN, J5:DiP, J5:DiP-A, J5:OT, J5:OT-A, S1:DiP-A, S1:OT, S1:OT-A, S5:DiP, S5:DiP-A, S5:OT, S5:OT-A |
| 458 | No          | 11      | 11-B | 1000   | McF_4 | 0   | last   | wholeT_0.01 | J1:DiP, J1:DiP-A, J1:OT, J1:OT-A, J5:CBN, J5:DiP, J5:DiP-A, J5:OT, J5:OT-A, S1:DiP-A, S5:DiP, S5:DiP-A, S5:OT, S5:OT-A                |
| 459 | No          | 11      | 11-B | 1000   | McF_4 | 0   | last   | wholeT_0.5  | J1:DiP, J1:DiP-A, J1:OT, J1:OT-A, J5:DiP, J5:DiP-A, J5:OT, J5:OT-A, S1:OT, S1:OT-A, S5:DiP, S5:DiP-A, S5:OT, S5:OT-A                  |
| 460 | No          | 11      | 11-B | 1000   | McF_4 | 0   | unif   | singleC     | J1:CBN-A, J1:DiP, J1:DiP-A, J1:OT, J1:OT-A, S1:DiP, S1:DiP-A, S1:OT, S1:OT-A, S5:CBN-A, S5:DiP, S5:DiP-A, S5:OT, S5:OT-A              |
| 461 | No          | 11      | 11-B | 1000   | McF_4 | 0   | unif   | wholeT_0.01 | J1:CBN-A, J1:DiP, J1:DiP-A, J1:OT, J1:OT-A, S1:DiP-A, S5:DiP, S5:DiP-A, S5:OT, S5:OT-A                                                |
| 462 | No          | 11      | 11-B | 1000   | McF_4 | 0   | unif   | wholeT_0.5  | J1:CBN-A, J1:DiP, J1:DiP-A, J1:OT, J1:OT-A, S1:DiP, S1:DiP-A, S1:OT, S1:OT-A, S5:DiP, S5:DiP-A, S5:OT, S5:OT-A                        |
| 463 | No          | 11      | 11-B | 1000   | McF_4 | Inf | last   | singleC     | J1:DiP, J1:DiP-A, J1:OT, J1:OT-A, J5:DiP, J5:DiP-A, J5:OT, J5:OT-A, S1:OT, S1:OT-A, S5:DiP, S5:DiP-A, S5:OT, S5:OT-A                  |
| 464 | No          | 11      | 11-B | 1000   | McF_4 | Inf | last   | wholeT_0.01 | J1:DiP, J1:DiP-A, J1:OT, J1:OT-A, J5:DiP, J5:DiP-A, J5:OT, J5:OT-A, S1:DiP, S1:DiP-A, S5:DiP, S5:DiP-A, S5:OT, S5:OT-A                |

Table 14: (continued)

|     | Conjunction | Drivers | Tree | S.Size | Model | sh  | S.Time | S.Type      | Best method(s)                                                                                                                                                      |
|-----|-------------|---------|------|--------|-------|-----|--------|-------------|---------------------------------------------------------------------------------------------------------------------------------------------------------------------|
| 465 | No          | 11      | 11-B | 1000   | McF_4 | Inf | last   | wholeT_0.5  | J1:DiP, J1:DiP-A, J1:OT, J1:OT-A, J5:DiP, J5:DiP-A, J5:OT, J5:OT-A, S1:DiP-A, S1:OT, S1:OT-A, S5:DiP, S5:DiP-A, S5:OT, S5:OT-A                                      |
| 466 | No          | 11      | 11-B | 1000   | McF_4 | Inf | unif   | singleC     | J1:DiP, J1:DiP-A, J1:OT, J1:OT-A, S1:DiP, S1:DiP-A, S1:OT, S1:OT-A, S5:DiP, S5:DiP-A, S5:OT, S5:OT-A                                                                |
| 467 | No          | 11      | 11-B | 1000   | McF_4 | Inf | unif   | wholeT_0.01 | J1:DiP, J1:DiP-A, J1:OT, J1:OT-A, S5:DiP, S5:DiP-A, S5:OT, S5:OT-A                                                                                                  |
| 468 | No          | 11      | 11-B | 1000   | McF_4 | Inf | unif   | wholeT_0.5  | J1:CBN-A, J1:DiP, J1:DiP-A, J1:OT-A, S1:DiP, S1:DiP-A, S5:DiP, S5:DiP-A, S5:OT                                                                                      |
| 469 | No          | 11      | 11-B | 1000   | McF_6 | 0   | last   | singleC     | J1:DiP, J1:OT, J5:DiP, J5:OT, S1:DiP, S5:DiP, S5:OT                                                                                                                 |
| 470 | No          | 11      | 11-B | 1000   | McF_6 | 0   | last   | wholeT_0.01 | J1:DiP, J1:OT, J5:DiP, J5:OT, S1:DiP, S5:DiP, S5:OT                                                                                                                 |
| 471 | No          | 11      | 11-B | 1000   | McF_6 | 0   | last   | wholeT_0.5  | J1:DiP, J1:OT, J5:DiP, J5:OT, S1:DiP, S5:DiP, S5:OT                                                                                                                 |
| 472 | No          | 11      | 11-B | 1000   | McF_6 | 0   | unif   | singleC     | J1:CBN, J1:CBN-A, J1:DiP, J1:DiP-A, J1:OT, J1:OT-A, J5:CBN-A, J5:DiP, J5:DiP-A, J5:OT, J5:OT-A, S1:DiP, S1:DiP-A, S1:OT-A, S5:CBN, S5:DiP, S5:DiP-A, S5:OT, S5:OT-A |
| 473 | No          | 11      | 11-B | 1000   | McF_6 | 0   | unif   | wholeT_0.01 | J1:CBN, J1:CBN-A, J1:DiP, J1:DiP-A, J1:OT, J1:OT-A, J5:CBN, J5:CBN-A, J5:DiP, J5:DiP-A, J5:OT, J5:OT-A, S1:DiP, S1:DiP-A, S5:CBN, S5:DiP, S5:DiP-A, S5:OT, S5:OT-A  |
| 474 | No          | 11      | 11-B | 1000   | McF_6 | 0   | unif   | wholeT_0.5  | J1:CBN, J1:CBN-A, J1:DiP, J1:DiP-A, J1:OT, J5:CBN, J5:CBN-A, J5:DiP, J5:DiP-A, J5:OT, J5:OT-A, S1:DiP, S1:DiP-A, S5:CBN, S5:CBN-A, S5:DiP, S5:DiP-A, S5:OT, S5:OT-A |
| 475 | No          | 11      | 11-B | 1000   | McF_6 | Inf | last   | singleC     | J1:DiP, J1:OT, J5:DiP, J5:OT, S1:DiP, S5:DiP, S5:OT                                                                                                                 |
| 476 | No          | 11      | 11-B | 1000   | McF_6 | Inf | last   | wholeT_0.01 | J1:DiP, J1:OT, J5:DiP, J5:OT, S1:DiP, S5:DiP, S5:OT                                                                                                                 |
| 477 | No          | 11      | 11-B | 1000   | McF_6 | Inf | last   | wholeT_0.5  | J1:DiP, J1:OT, J5:DiP, J5:OT, S1:DiP, S5:DiP, S5:OT                                                                                                                 |

Table 14: (continued)

|     | Conjunction | Drivers | Tree | S.Size | Model | sh  | S.Time | S.Type      | Best method(s)                                                                                                                                        |
|-----|-------------|---------|------|--------|-------|-----|--------|-------------|-------------------------------------------------------------------------------------------------------------------------------------------------------|
| 478 | No          | 11      | 11-B | 1000   | McF_6 | Inf | unif   | singleC     | J1:CBN-A, J1:DiP, J1:DiP-A, J1:OT, J5:CBN-A, J5:DiP, J5:DiP-A, J5:OT, J5:OT-A, S1:DiP, S1:DiP-A, S5:CBN, S5:DiP, S5:DiP-A, S5:OT                      |
| 479 | No          | 11      | 11-B | 1000   | McF_6 | Inf | unif   | wholeT_0.01 | J1:CBN-A, J1:DiP, J1:DiP-A, J1:OT-A, J5:CBN-A, J5:DiP, J5:DiP-A, J5:OT, J5:OT-A, S1:DiP, S1:DiP-A, S5:DiP, S5:DiP-A, S5:OT, S5:OT-A                   |
| 480 | No          | 11      | 11-B | 1000   | McF_6 | Inf | unif   | wholeT_0.5  | J1:CBN-A, J1:DiP, J1:DiP-A, J1:OT, J1:OT-A, J5:CBN-A, J5:DiP, J5:DiP-A, J5:OT, J5:OT-A, S1:DiP, S1:DiP-A, S5:CBN, S5:CBN-A, S5:DiP, S5:DiP-A, S5:OT-A |
| 481 | No          | 11      | 11-B | 200    | Bozic | 0   | last   | singleC     | S5:OT, S5:OT-A                                                                                                                                        |
| 482 | No          | 11      | 11-B | 200    | Bozic | 0   | last   | wholeT_0.01 | J1:OT, J1:OT-A, J5:CBN, J5:CBN-A, J5:OT, J5:OT-A, S5:CBN-A, S5:OT, S5:OT-A                                                                            |
| 483 | No          | 11      | 11-B | 200    | Bozic | 0   | last   | wholeT_0.5  | S1:OT, S1:OT-A                                                                                                                                        |
| 484 | No          | 11      | 11-B | 200    | Bozic | 0   | unif   | singleC     | S1:OT, S1:OT-A                                                                                                                                        |
| 485 | No          | 11      | 11-B | 200    | Bozic | 0   | unif   | wholeT_0.01 | J1:CBN, J1:CBN-A, J1:DiP, J1:DiP-A, S5:CBN-A, S5:DiP-A, S5:OT, S5:OT-A                                                                                |
| 486 | No          | 11      | 11-B | 200    | Bozic | 0   | unif   | wholeT_0.5  | S1:CBN, S1:CBN-A                                                                                                                                      |
| 487 | No          | 11      | 11-B | 200    | Bozic | Inf | last   | singleC     | J5:OT, J5:OT-A, S5:OT-A                                                                                                                               |
| 488 | No          | 11      | 11-B | 200    | Bozic | Inf | last   | wholeT_0.01 | J5:OT, J5:OT-A                                                                                                                                        |
| 489 | No          | 11      | 11-B | 200    | Bozic | Inf | last   | wholeT_0.5  | J5:OT, J5:OT-A, S5:OT, S5:OT-A                                                                                                                        |
| 490 | No          | 11      | 11-B | 200    | Bozic | Inf | unif   | singleC     | J1:CBN, J1:CBN-A, J1:OT, J1:OT-A                                                                                                                      |
| 491 | No          | 11      | 11-B | 200    | Bozic | Inf | unif   | wholeT_0.01 | J5:CBN, J5:CBN-A, S5:CBN, S5:CBN-A, S5:OT, S5:OT-A                                                                                                    |
| 492 | No          | 11      | 11-B | 200    | Bozic | Inf | unif   | wholeT_0.5  | J1:CBN, J1:CBN-A, J1:OT, J1:OT-A, S5:CBN, S5:CBN-A                                                                                                    |
| 493 | No          | 11      | 11-B | 200    | exp   | 0   | last   | singleC     | S1:OT, S1:OT-A                                                                                                                                        |
| 494 | No          | 11      | 11-B | 200    | exp   | 0   | last   | wholeT_0.01 | J1:OT, J1:OT-A, S1:OT, S1:OT-A, S5:OT, S5:OT-A                                                                                                        |
| 495 | No          | 11      | 11-B | 200    | exp   | 0   | last   | wholeT_0.5  | S1:OT, S1:OT-A                                                                                                                                        |
| 496 | No          | 11      | 11-B | 200    | exp   | 0   | unif   | singleC     | S1:CBN, S1:CBN-A, S5:CBN, S5:CBN-A                                                                                                                    |
| 497 | No          | 11      | 11-B | 200    | exp   | 0   | unif   | wholeT_0.01 | S1:OT, S1:OT-A                                                                                                                                        |
| 498 | No          | 11      | 11-B | 200    | exp   | 0   | unif   | wholeT_0.5  | S1:CBN, S1:CBN-A, S5:CBN, S5:CBN-A                                                                                                                    |
| 499 | No          | 11      | 11-B | 200    | exp   | Inf | last   | singleC     | J1:OT, J1:OT-A, S5:OT, S5:OT-A                                                                                                                        |
| 500 | No          | 11      | 11-B | 200    | exp   | Inf | last   | wholeT_0.01 | J5:CBN-A, J5:OT, J5:OT-A                                                                                                                              |
| 501 | No          | 11      | 11-B | 200    | exp   | Inf | last   | wholeT_0.5  | J1:OT, J1:OT-A, S5:OT, S5:OT-A                                                                                                                        |

Table 14: (continued)

|     | Conjunction | Drivers | Tree | S.Size | Model | sh  | S.Time | S.Type      | Best method(s)                                                                                                         |
|-----|-------------|---------|------|--------|-------|-----|--------|-------------|------------------------------------------------------------------------------------------------------------------------|
| 502 | No          | 11      | 11-B | 200    | exp   | Inf | unif   | singleC     | S1:OT, S1:OT-A                                                                                                         |
| 503 | No          | 11      | 11-B | 200    | exp   | Inf | unif   | wholeT_0.01 | S5:OT, S5:OT-A                                                                                                         |
| 504 | No          | 11      | 11-B | 200    | exp   | Inf | unif   | wholeT_0.5  | J1:CBN-A, S1:OT, S1:OT-A                                                                                               |
| 505 | No          | 11      | 11-B | 200    | McF_4 | 0   | last   | singleC     | J1:DiP-A, J1:OT-A, J5:DiP-A, J5:OT, J5:OT-A, S1:DiP-A, S5:DiP, S5:DiP-A, S5:OT, S5:OT-A                                |
| 506 | No          | 11      | 11-B | 200    | McF_4 | 0   | last   | wholeT_0.01 | J1:DiP, J1:DiP-A, J1:OT, J1:OT-A, J5:CBN, J5:DiP-A, J5:OT, J5:OT-A, S1:DiP, S1:DiP-A, S5:DiP, S5:DiP-A, S5:OT, S5:OT-A |
| 507 | No          | 11      | 11-B | 200    | McF_4 | 0   | last   | wholeT_0.5  | J1:DiP-A, J1:OT, J1:OT-A, J5:DiP-A, J5:OT, J5:OT-A, S1:DiP-A, S5:DiP, S5:DiP-A, S5:OT, S5:OT-A                         |
| 508 | No          | 11      | 11-B | 200    | McF_4 | 0   | unif   | singleC     | J1:CBN, J1:CBN-A, J1:OT, J1:OT-A, S5:CBN-A, S5:DiP, S5:DiP-A, S5:OT, S5:OT-A                                           |
| 509 | No          | 11      | 11-B | 200    | McF_4 | 0   | unif   | wholeT_0.01 | J1:CBN-A, J1:DiP, J1:DiP-A, J1:OT, J1:OT-A, S1:DiP, S1:DiP-A, S5:DiP, S5:DiP-A, S5:OT, S5:OT-A                         |
| 510 | No          | 11      | 11-B | 200    | McF_4 | 0   | unif   | wholeT_0.5  | J1:CBN-A, J1:OT, J1:OT-A, S5:CBN-A, S5:OT, S5:OT-A                                                                     |
| 511 | No          | 11      | 11-B | 200    | McF_4 | Inf | last   | singleC     | J1:OT, J1:OT-A, J5:OT, J5:OT-A, S5:OT, S5:OT-A                                                                         |
| 512 | No          | 11      | 11-B | 200    | McF_4 | Inf | last   | wholeT_0.01 | J1:DiP-A, J5:OT, J5:OT-A, S5:DiP-A, S5:OT, S5:OT-A                                                                     |
| 513 | No          | 11      | 11-B | 200    | McF_4 | Inf | last   | wholeT_0.5  | J1:OT, J1:OT-A, J5:OT, J5:OT-A, S5:OT, S5:OT-A                                                                         |
| 514 | No          | 11      | 11-B | 200    | McF_4 | Inf | unif   | singleC     | J1:CBN-A, J1:OT, J1:OT-A, S5:CBN-A, S5:OT, S5:OT-A                                                                     |
| 515 | No          | 11      | 11-B | 200    | McF_4 | Inf | unif   | wholeT_0.01 | J1:OT, J5:OT, J5:OT-A, S5:CBN-A, S5:OT, S5:OT-A                                                                        |
| 516 | No          | 11      | 11-B | 200    | McF_4 | Inf | unif   | wholeT_0.5  | J1:CBN-A, J1:OT, J1:OT-A, S5:OT, S5:OT-A                                                                               |
| 517 | No          | 11      | 11-B | 200    | McF_6 | 0   | last   | singleC     | J1:DiP, J1:OT, J5:DiP, J5:OT, S1:DiP, S5:DiP, S5:OT                                                                    |
| 518 | No          | 11      | 11-B | 200    | McF_6 | 0   | last   | wholeT_0.01 | J1:DiP, J1:OT, J5:DiP, J5:OT, S1:DiP, S5:DiP, S5:OT                                                                    |
| 519 | No          | 11      | 11-B | 200    | McF_6 | 0   | last   | wholeT_0.5  | J1:DiP, J1:OT, J5:OT, S1:DiP, S5:DiP, S5:OT                                                                            |

Table 14: (continued)

|     | Conjunction | Drivers | Tree | S.Size | Model | sh  | S.Time | S.Type      | Best method(s)                                                                                                                                             |
|-----|-------------|---------|------|--------|-------|-----|--------|-------------|------------------------------------------------------------------------------------------------------------------------------------------------------------|
| 520 | No          | 11      | 11-B | 200    | McF_6 | 0   | unif   | singleC     | J1:CBN, J1:CBN-A, J1:DiP, J1:DiP-A, J1:OT, J1:OT-A, J5:CBN, J5:CBN-A, J5:DiP, J5:DiP-A, J5:OT, J5:OT-A, S5:CBN, S5:CBN-A, S5:DiP, S5:DiP-A, S5:OT, S5:OT-A |
| 521 | No          | 11      | 11-B | 200    | McF_6 | 0   | unif   | wholeT_0.01 | J1:CBN, J1:CBN-A, J1:DiP, J1:DiP-A, J1:OT, J1:OT-A, J5:CBN, J5:CBN-A, J5:DiP, J5:DiP-A, J5:OT, J5:OT-A, S5:CBN-A, S5:DiP, S5:DiP-A, S5:OT, S5:OT-A         |
| 522 | No          | 11      | 11-B | 200    | McF_6 | 0   | unif   | wholeT_0.5  | J1:CBN, J1:CBN-A, J1:DiP, J1:DiP-A, J1:OT, J1:OT-A, J5:CBN, J5:CBN-A, J5:DiP-A, J5:OT, J5:OT-A, S5:CBN, S5:CBN-A, S5:OT, S5:OT-A                           |
| 523 | No          | 11      | 11-B | 200    | McF_6 | Inf | last   | singleC     | J1:OT, J5:OT, S5:OT                                                                                                                                        |
| 524 | No          | 11      | 11-B | 200    | McF_6 | Inf | last   | wholeT_0.01 | J1:OT, J5:OT, S1:DiP, S5:OT                                                                                                                                |
| 525 | No          | 11      | 11-B | 200    | McF_6 | Inf | last   | wholeT_0.5  | J1:OT, J5:OT, S1:DiP, S5:DiP, S5:OT                                                                                                                        |
| 526 | No          | 11      | 11-B | 200    | McF_6 | Inf | unif   | singleC     | J1:CBN, J1:CBN-A, J1:OT, J1:OT-A, J5:CBN, J5:CBN-A, J5:DiP-A, J5:OT, J5:OT-A, S5:CBN, S5:CBN-A, S5:OT, S5:OT-A                                             |
| 527 | No          | 11      | 11-B | 200    | McF_6 | Inf | unif   | wholeT_0.01 | J1:CBN, J1:CBN-A, J1:OT, J1:OT-A, J5:CBN-A, J5:DiP-A, J5:OT, J5:OT-A, S5:CBN, S5:CBN-A, S5:OT, S5:OT-A                                                     |
| 528 | No          | 11      | 11-B | 200    | McF_6 | Inf | unif   | wholeT_0.5  | J1:CBN, J1:CBN-A, J1:OT, J1:OT-A, J5:CBN-A, J5:OT, J5:OT-A, S5:CBN, S5:CBN-A, S5:OT, S5:OT-A                                                               |
| 529 | No          | 11      | 11-B | 100    | Bozic | 0   | last   | singleC     | S5:OT, S5:OT-A                                                                                                                                             |
| 530 | No          | 11      | 11-B | 100    | Bozic | 0   | last   | wholeT_0.01 | J5:CBN-A, J5:OT, J5:OT-A, S5:OT, S5:OT-A                                                                                                                   |
| 531 | No          | 11      | 11-B | 100    | Bozic | 0   | last   | wholeT_0.5  | J1:CBN, J1:CBN-A, J1:OT, J1:OT-A, S1:OT, S1:OT-A                                                                                                           |
| 532 | No          | 11      | 11-B | 100    | Bozic | 0   | unif   | singleC     | S1:OT, S1:OT-A                                                                                                                                             |
| 533 | No          | 11      | 11-B | 100    | Bozic | 0   | unif   | wholeT_0.01 | J1:CBN, J1:CBN-A, J1:OT, J1:OT-A, S5:CBN, S5:OT, S5:OT-A                                                                                                   |
| 534 | No          | 11      | 11-B | 100    | Bozic | 0   | unif   | wholeT_0.5  | J1:CBN-A, S1:OT, S1:OT-A                                                                                                                                   |
| 535 | No          | 11      | 11-B | 100    | Bozic | Inf | last   | singleC     | J5:OT, J5:OT-A                                                                                                                                             |
| 536 | No          | 11      | 11-B | 100    | Bozic | Inf | last   | wholeT_0.01 | J5:OT, J5:OT-A                                                                                                                                             |
| 537 | No          | 11      | 11-B | 100    | Bozic | Inf | last   | wholeT_0.5  | J5:OT, J5:OT-A                                                                                                                                             |

Table 14: (continued)

|     | Conjunction | Drivers | Tree | S.Size | Model | sh  | S.Time | S.Type      | Best method(s)                                                                                                 |
|-----|-------------|---------|------|--------|-------|-----|--------|-------------|----------------------------------------------------------------------------------------------------------------|
| 538 | No          | 11      | 11-B | 100    | Bozic | Inf | unif   | singleC     | J1:CBN, J1:OT, J1:OT-A, J5:CBN, J5:CBN-A, S1:OT, S1:OT-A, S5:CBN, S5:CBN-A                                     |
| 539 | No          | 11      | 11-B | 100    | Bozic | Inf | unif   | wholeT_0.01 | J5:CBN, J5:CBN-A, S5:CBN, S5:CBN-A, S5:OT, S5:OT-A                                                             |
| 540 | No          | 11      | 11-B | 100    | Bozic | Inf | unif   | wholeT_0.5  | J1:CBN, J1:CBN-A, J1:OT, J1:OT-A, S1:OT, S1:OT-A, S5:CBN, S5:CBN-A                                             |
| 541 | No          | 11      | 11-B | 100    | exp   | 0   | last   | singleC     | S1:OT, S1:OT-A                                                                                                 |
| 542 | No          | 11      | 11-B | 100    | exp   | 0   | last   | wholeT_0.01 | J1:OT, J1:OT-A, S5:OT, S5:OT-A                                                                                 |
| 543 | No          | 11      | 11-B | 100    | exp   | 0   | last   | wholeT_0.5  | S1:OT, S1:OT-A                                                                                                 |
| 544 | No          | 11      | 11-B | 100    | exp   | 0   | unif   | singleC     | J1:CBN, S1:OT, S1:OT-A                                                                                         |
| 545 | No          | 11      | 11-B | 100    | exp   | 0   | unif   | wholeT_0.01 | S1:OT, S1:OT-A                                                                                                 |
| 546 | No          | 11      | 11-B | 100    | exp   | 0   | unif   | wholeT_0.5  | J1:CBN, J1:CBN-A, S1:OT, S1:OT-A                                                                               |
| 547 | No          | 11      | 11-B | 100    | exp   | Inf | last   | singleC     | J5:OT, J5:OT-A, S5:OT, S5:OT-A                                                                                 |
| 548 | No          | 11      | 11-B | 100    | exp   | Inf | last   | wholeT_0.01 | J5:CBN-A, J5:OT, J5:OT-A                                                                                       |
| 549 | No          | 11      | 11-B | 100    | exp   | Inf | last   | wholeT_0.5  | S5:OT, S5:OT-A                                                                                                 |
| 550 | No          | 11      | 11-B | 100    | exp   | Inf | unif   | singleC     | J1:CBN, J1:OT, J1:OT-A, S1:OT, S1:OT-A, S5:CBN, S5:CBN-A                                                       |
| 551 | No          | 11      | 11-B | 100    | exp   | Inf | unif   | wholeT_0.01 | S5:CBN-A, S5:OT, S5:OT-A                                                                                       |
| 552 | No          | 11      | 11-B | 100    | exp   | Inf | unif   | wholeT_0.5  | J1:CBN-A, J1:OT, J1:OT-A, S1:OT, S1:OT-A                                                                       |
| 553 | No          | 11      | 11-B | 100    | McF_4 | 0   | last   | singleC     | J5:OT, J5:OT-A, S5:OT, S5:OT-A                                                                                 |
| 554 | No          | 11      | 11-B | 100    | McF_4 | 0   | last   | wholeT_0.01 | J1:DiP, J1:DiP-A, J1:OT, J1:OT-A, J5:DiP-A, J5:OT, J5:OT-A, S1:DiP, S1:DiP-A, S5:DiP, S5:DiP-A, S5:OT, S5:OT-A |
| 555 | No          | 11      | 11-B | 100    | McF_4 | 0   | last   | wholeT_0.5  | J5:OT, J5:OT-A, S5:OT, S5:OT-A                                                                                 |
| 556 | No          | 11      | 11-B | 100    | McF_4 | 0   | unif   | singleC     | J1:CBN-A, J1:OT, J1:OT-A, S5:CBN-A, S5:OT, S5:OT-A                                                             |
| 557 | No          | 11      | 11-B | 100    | McF_4 | 0   | unif   | wholeT_0.01 | J1:DiP, J1:DiP-A, S1:DiP, S1:DiP-A, S5:CBN, S5:CBN-A, S5:DiP, S5:DiP-A, S5:OT, S5:OT-A                         |
| 558 | No          | 11      | 11-B | 100    | McF_4 | 0   | unif   | wholeT_0.5  | J1:CBN-A, J1:OT, J1:OT-A, S5:CBN, S5:OT, S5:OT-A                                                               |
| 559 | No          | 11      | 11-B | 100    | McF_4 | Inf | last   | singleC     | J5:OT, J5:OT-A, S5:OT, S5:OT-A                                                                                 |
| 560 | No          | 11      | 11-B | 100    | McF_4 | Inf | last   | wholeT_0.01 | J5:OT, J5:OT-A, S5:OT, S5:OT-A                                                                                 |
| 561 | No          | 11      | 11-B | 100    | McF_4 | Inf | last   | wholeT_0.5  | J5:OT, J5:OT-A, S5:OT, S5:OT-A                                                                                 |
| 562 | No          | 11      | 11-B | 100    | McF_4 | Inf | unif   | singleC     | J1:OT, J1:OT-A, S5:CBN-A, S5:OT, S5:OT-A                                                                       |
| 563 | No          | 11      | 11-B | 100    | McF_4 | Inf | unif   | wholeT_0.01 | J5:OT, J5:OT-A, S5:OT                                                                                          |

Table 14: (continued)

|     | Conjunction | Drivers | Tree | S.Size | Model | sh  | S.Time | S.Type      | Best method(s)                                                                                                         |
|-----|-------------|---------|------|--------|-------|-----|--------|-------------|------------------------------------------------------------------------------------------------------------------------|
| 564 | No          | 11      | 11-B | 100    | McF_4 | Inf | unif   | wholeT_0.5  | J5:OT, J5:OT-A, S5:OT, S5:OT-A                                                                                         |
| 565 | No          | 11      | 11-B | 100    | McF_6 | 0   | last   | singleC     | J1:OT, J5:OT, S5:OT                                                                                                    |
| 566 | No          | 11      | 11-B | 100    | McF_6 | 0   | last   | wholeT_0.01 | J1:DiP, J1:OT, J5:DiP, J5:OT, S1:DiP, S5:DiP, S5:OT                                                                    |
| 567 | No          | 11      | 11-B | 100    | McF_6 | 0   | last   | wholeT_0.5  | J1:OT, J5:OT, S5:OT                                                                                                    |
| 568 | No          | 11      | 11-B | 100    | McF_6 | 0   | unif   | singleC     | J1:CBN, J1:CBN-A, J1:OT, J1:OT-A, J5:CBN, J5:CBN-A, J5:OT, J5:OT-A, S5:CBN, S5:OT, S5:OT-A                             |
| 569 | No          | 11      | 11-B | 100    | McF_6 | 0   | unif   | wholeT_0.01 | J1:DiP, J1:DiP-A, J5:CBN, J5:CBN-A, J5:DiP, J5:DiP-A, J5:OT, J5:OT-A, S1:DiP, S5:DiP, S5:DiP-A, S5:OT, S5:OT-A         |
| 570 | No          | 11      | 11-B | 100    | McF_6 | 0   | unif   | wholeT_0.5  | J1:CBN, J1:CBN-A, J1:OT, J1:OT-A, J5:CBN, J5:CBN-A, J5:OT, J5:OT-A, S5:CBN, S5:CBN-A, S5:OT, S5:OT-A                   |
| 571 | No          | 11      | 11-B | 100    | McF_6 | Inf | last   | singleC     | J1:OT, J5:OT, S5:OT                                                                                                    |
| 572 | No          | 11      | 11-B | 100    | McF_6 | Inf | last   | wholeT_0.01 | J5:OT, S5:OT                                                                                                           |
| 573 | No          | 11      | 11-B | 100    | McF_6 | Inf | last   | wholeT_0.5  | J1:OT, J5:OT, S5:OT                                                                                                    |
| 574 | No          | 11      | 11-B | 100    | McF_6 | Inf | unif   | singleC     | J1:CBN, J1:CBN-A, J1:OT, J1:OT-A, J5:CBN, J5:CBN-A, J5:OT, J5:OT-A, S5:CBN, S5:CBN-A, S5:OT, S5:OT-A                   |
| 575 | No          | 11      | 11-B | 100    | McF_6 | Inf | unif   | wholeT_0.01 | J5:CBN-A, J5:OT, J5:OT-A, S5:CBN, S5:CBN-A, S5:OT, S5:OT-A                                                             |
| 576 | No          | 11      | 11-B | 100    | McF_6 | Inf | unif   | wholeT_0.5  | J1:CBN-A, J1:OT, J1:OT-A, J5:CBN, J5:CBN-A, J5:OT, J5:OT-A, S5:CBN-A, S5:OT, S5:OT-A                                   |
| 577 | No          | 9       | 9-B  | 1000   | Bozic | 0   | last   | singleC     | S1:OT, S1:OT-A                                                                                                         |
| 578 | No          | 9       | 9-B  | 1000   | Bozic | 0   | last   | wholeT_0.01 | S1:CBN-A, S1:DiP, S1:DiP-A, S1:OT, S1:OT-A, S5:CBN-A, S5:DiP-A, S5:OT, S5:OT-A                                         |
| 579 | No          | 9       | 9-B  | 1000   | Bozic | 0   | last   | wholeT_0.5  | S1:OT, S1:OT-A                                                                                                         |
| 580 | No          | 9       | 9-B  | 1000   | Bozic | 0   | unif   | singleC     | S1:CBN, S1:CBN-A, S5:CBN, S5:CBN-A                                                                                     |
| 581 | No          | 9       | 9-B  | 1000   | Bozic | 0   | unif   | wholeT_0.01 | J1:DiP, J1:DiP-A, J1:OT, J1:OT-A, S1:DiP, S1:DiP-A, S1:OT, S1:OT-A                                                     |
| 582 | No          | 9       | 9-B  | 1000   | Bozic | 0   | unif   | wholeT_0.5  | S1:CBN, S1:CBN-A, S5:CBN, S5:CBN-A                                                                                     |
| 583 | No          | 9       | 9-B  | 1000   | Bozic | Inf | last   | singleC     | J1:DiP, J1:DiP-A, J1:OT, J1:OT-A, J5:DiP, J5:DiP-A, J5:OT, J5:OT-A, S1:DiP, S1:DiP-A, S5:DiP, S5:DiP-A, S5:OT, S5:OT-A |
| 584 | No          | 9       | 9-B  | 1000   | Bozic | Inf | last   | wholeT_0.01 | J5:DiP, J5:DiP-A                                                                                                       |



Table 14: (continued)

|     | Conjunction | Drivers | Tree | S.Size | Model | sh  | S.Time | S.Type      | Best method(s)                                                                                                                        |
|-----|-------------|---------|------|--------|-------|-----|--------|-------------|---------------------------------------------------------------------------------------------------------------------------------------|
| 585 | No          | 9       | 9-B  | 1000   | Bozic | Inf | last   | wholeT_0.5  | J1:DiP, J1:DiP-A, J1:OT, J1:OT-A,<br>J5:DiP, J5:DiP-A, J5:OT, J5:OT-A,<br>S1:DiP, S1:DiP-A, S5:DiP, S5:DiP-A,<br>S5:OT, S5:OT-A       |
| 586 | No          | 9       | 9-B  | 1000   | Bozic | Inf | unif   | singleC     | S1:CBN, S1:CBN-A, S1:DiP, S1:OT,<br>S1:OT-A                                                                                           |
| 587 | No          | 9       | 9-B  | 1000   | Bozic | Inf | unif   | wholeT_0.01 | J1:CBN-A, S5:CBN, S5:CBN-A, S5:DiP,<br>S5:DiP-A, S5:OT, S5:OT-A                                                                       |
| 588 | No          | 9       | 9-B  | 1000   | Bozic | Inf | unif   | wholeT_0.5  | S1:CBN, S1:CBN-A, S1:DiP-A, S1:OT,<br>S1:OT-A                                                                                         |
| 589 | No          | 9       | 9-B  | 1000   | exp   | 0   | last   | singleC     | J1:CBN, J1:CBN-A, S1:CBN, S1:CBN-A,<br>S5:CBN, S5:CBN-A                                                                               |
| 590 | No          | 9       | 9-B  | 1000   | exp   | 0   | last   | wholeT_0.01 | S1:DiP-A, S1:OT, S1:OT-A                                                                                                              |
| 591 | No          | 9       | 9-B  | 1000   | exp   | 0   | last   | wholeT_0.5  | J1:CBN, J1:CBN-A, S1:CBN, S1:CBN-A,<br>S5:CBN, S5:CBN-A                                                                               |
| 592 | No          | 9       | 9-B  | 1000   | exp   | 0   | unif   | singleC     | S1:CBN, S1:CBN-A, S5:CBN, S5:CBN-A                                                                                                    |
| 593 | No          | 9       | 9-B  | 1000   | exp   | 0   | unif   | wholeT_0.01 | S1:CBN, S1:CBN-A, S5:CBN, S5:CBN-A                                                                                                    |
| 594 | No          | 9       | 9-B  | 1000   | exp   | 0   | unif   | wholeT_0.5  | S1:CBN, S1:CBN-A, S5:CBN, S5:CBN-A                                                                                                    |
| 595 | No          | 9       | 9-B  | 1000   | exp   | Inf | last   | singleC     | J1:DiP, J1:DiP-A, J1:OT, J1:OT-A,<br>S1:DiP-A, S5:DiP, S5:DiP-A, S5:OT,<br>S5:OT-A                                                    |
| 596 | No          | 9       | 9-B  | 1000   | exp   | Inf | last   | wholeT_0.01 | J5:DiP, J5:DiP-A, S5:DiP                                                                                                              |
| 597 | No          | 9       | 9-B  | 1000   | exp   | Inf | last   | wholeT_0.5  | J1:DiP, J1:DiP-A, J1:OT, J1:OT-A,<br>S5:DiP-A, S5:OT, S5:OT-A                                                                         |
| 598 | No          | 9       | 9-B  | 1000   | exp   | Inf | unif   | singleC     | S1:OT, S1:OT-A                                                                                                                        |
| 599 | No          | 9       | 9-B  | 1000   | exp   | Inf | unif   | wholeT_0.01 | J1:OT, J1:OT-A                                                                                                                        |
| 600 | No          | 9       | 9-B  | 1000   | exp   | Inf | unif   | wholeT_0.5  | S1:OT, S1:OT-A                                                                                                                        |
| 601 | No          | 9       | 9-B  | 1000   | McF_4 | 0   | last   | singleC     | J1:DiP, J1:DiP-A, J1:OT, J1:OT-A,<br>J5:CBN, J5:DiP, J5:DiP-A, J5:OT,<br>J5:OT-A, S1:OT, S1:OT-A, S5:DiP,<br>S5:DiP-A, S5:OT, S5:OT-A |
| 602 | No          | 9       | 9-B  | 1000   | McF_4 | 0   | last   | wholeT_0.01 | J1:DiP, J1:DiP-A, J1:OT, J1:OT-A,<br>J5:DiP, J5:DiP-A, J5:OT, J5:OT-A,<br>S5:DiP, S5:DiP-A, S5:OT-A                                   |
| 603 | No          | 9       | 9-B  | 1000   | McF_4 | 0   | last   | wholeT_0.5  | J1:DiP, J1:DiP-A, J1:OT, J1:OT-A,<br>J5:CBN, J5:DiP, J5:DiP-A, J5:OT,<br>J5:OT-A, S1:OT, S1:OT-A, S5:DiP,<br>S5:DiP-A, S5:OT, S5:OT-A |

Table 14: (continued)

|     | Conjunction | Drivers | Tree | S.Size | Model | sh  | S.Time | S.Type      | Best method(s)                                                                                                         |
|-----|-------------|---------|------|--------|-------|-----|--------|-------------|------------------------------------------------------------------------------------------------------------------------|
| 604 | No          | 9       | 9-B  | 1000   | McF_4 | 0   | unif   | singleC     | J1:DiP, J1:DiP-A, J1:OT, J1:OT-A, S1:DiP, S1:DiP-A, S1:OT, S1:OT-A, S5:DiP-A, S5:OT, S5:OT-A                           |
| 605 | No          | 9       | 9-B  | 1000   | McF_4 | 0   | unif   | wholeT_0.01 | J1:DiP, J1:DiP-A, J1:OT, J1:OT-A, S1:DiP-A, S5:DiP, S5:DiP-A, S5:OT, S5:OT-A                                           |
| 606 | No          | 9       | 9-B  | 1000   | McF_4 | 0   | unif   | wholeT_0.5  | J1:DiP, J1:DiP-A, J1:OT, J1:OT-A, S1:DiP, S1:DiP-A, S1:OT, S1:OT-A, S5:DiP, S5:DiP-A, S5:OT, S5:OT-A                   |
| 607 | No          | 9       | 9-B  | 1000   | McF_4 | Inf | last   | singleC     | J1:DiP, J1:DiP-A, J1:OT, J1:OT-A, J5:DiP, J5:DiP-A, J5:OT, J5:OT-A, S1:OT, S1:OT-A, S5:DiP, S5:DiP-A, S5:OT, S5:OT-A   |
| 608 | No          | 9       | 9-B  | 1000   | McF_4 | Inf | last   | wholeT_0.01 | J1:DiP, J1:DiP-A, J1:OT, J1:OT-A, J5:DiP, J5:DiP-A, J5:OT, J5:OT-A, S1:DiP-A, S5:DiP, S5:DiP-A, S5:OT, S5:OT-A         |
| 609 | No          | 9       | 9-B  | 1000   | McF_4 | Inf | last   | wholeT_0.5  | J1:DiP-A, J1:OT, J1:OT-A, J5:DiP, J5:DiP-A, J5:OT, J5:OT-A, S1:DiP-A, S1:OT, S1:OT-A, S5:DiP, S5:DiP-A, S5:OT, S5:OT-A |
| 610 | No          | 9       | 9-B  | 1000   | McF_4 | Inf | unif   | singleC     | J1:DiP, J1:DiP-A, J1:OT, J1:OT-A, S1:DiP, S1:DiP-A, S1:OT, S1:OT-A, S5:DiP, S5:DiP-A, S5:OT, S5:OT-A                   |
| 611 | No          | 9       | 9-B  | 1000   | McF_4 | Inf | unif   | wholeT_0.01 | J1:DiP, J1:DiP-A, J1:OT, J1:OT-A, S5:DiP, S5:DiP-A, S5:OT, S5:OT-A                                                     |
| 612 | No          | 9       | 9-B  | 1000   | McF_4 | Inf | unif   | wholeT_0.5  | J1:DiP, J1:DiP-A, J1:OT, J1:OT-A, S1:DiP, S1:DiP-A, S1:OT, S1:OT-A, S5:DiP, S5:DiP-A, S5:OT, S5:OT-A                   |
| 613 | No          | 9       | 9-B  | 1000   | McF_6 | 0   | last   | singleC     | J1:DiP, J1:OT, J5:DiP, J5:OT, S1:DiP, S5:DiP, S5:OT                                                                    |
| 614 | No          | 9       | 9-B  | 1000   | McF_6 | 0   | last   | wholeT_0.01 | J1:DiP, J1:OT, J5:DiP, J5:OT, S1:DiP, S5:DiP, S5:OT                                                                    |
| 615 | No          | 9       | 9-B  | 1000   | McF_6 | 0   | last   | wholeT_0.5  | J1:DiP, J1:OT, J5:DiP, J5:OT, S1:DiP, S1:OT, S5:DiP, S5:OT                                                             |

Table 14: (continued)

|     | Conjunction | Drivers | Tree | S.Size | Model | sh  | S.Time | S.Type      | Best method(s)                                                                                                                                                                       |
|-----|-------------|---------|------|--------|-------|-----|--------|-------------|--------------------------------------------------------------------------------------------------------------------------------------------------------------------------------------|
| 616 | No          | 9       | 9-B  | 1000   | McF_6 | 0   | unif   | singleC     | J1:CBN, J1:CBN-A, J1:DiP, J1:DiP-A, J1:OT, J1:OT-A, J5:CBN, J5:CBN-A, J5:DiP, J5:DiP-A, J5:OT, J5:OT-A, S1:DiP, S1:DiP-A, S1:OT, S1:OT-A, S5:CBN-A, S5:DiP, S5:DiP-A, S5:OT, S5:OT-A |
| 617 | No          | 9       | 9-B  | 1000   | McF_6 | 0   | unif   | wholeT_0.01 | J1:CBN, J1:CBN-A, J1:DiP, J1:DiP-A, J1:OT, J1:OT-A, J5:CBN, J5:CBN-A, J5:DiP, J5:DiP-A, J5:OT, J5:OT-A, S1:DiP, S5:DiP, S5:DiP-A, S5:OT, S5:OT-A                                     |
| 618 | No          | 9       | 9-B  | 1000   | McF_6 | 0   | unif   | wholeT_0.5  | J1:CBN-A, J1:DiP, J1:DiP-A, J1:OT, J1:OT-A, J5:CBN, J5:CBN-A, J5:DiP, J5:DiP-A, J5:OT, J5:OT-A, S1:DiP, S1:DiP-A, S1:OT, S1:OT-A, S5:CBN, S5:DiP-A, S5:OT, S5:OT-A                   |
| 619 | No          | 9       | 9-B  | 1000   | McF_6 | Inf | last   | singleC     | J1:DiP, J1:OT, J5:DiP, J5:OT, S1:DiP, S5:DiP, S5:OT                                                                                                                                  |
| 620 | No          | 9       | 9-B  | 1000   | McF_6 | Inf | last   | wholeT_0.01 | J1:DiP, J1:OT, J5:DiP, J5:OT, S1:DiP, S5:DiP, S5:OT                                                                                                                                  |
| 621 | No          | 9       | 9-B  | 1000   | McF_6 | Inf | last   | wholeT_0.5  | J1:DiP, J1:OT, J5:DiP, J5:OT, S1:DiP, S5:DiP, S5:OT                                                                                                                                  |
| 622 | No          | 9       | 9-B  | 1000   | McF_6 | Inf | unif   | singleC     | J1:CBN, J1:CBN-A, J1:DiP, J1:DiP-A, J1:OT, J1:OT-A, J5:CBN-A, J5:DiP, J5:DiP-A, J5:OT, J5:OT-A, S1:DiP, S1:DiP-A, S1:OT, S1:OT-A, S5:DiP, S5:DiP-A, S5:OT, S5:OT-A                   |
| 623 | No          | 9       | 9-B  | 1000   | McF_6 | Inf | unif   | wholeT_0.01 | J1:CBN, J1:CBN-A, J1:DiP, J1:DiP-A, J1:OT, J1:OT-A, J5:CBN-A, J5:DiP, J5:DiP-A, J5:OT, J5:OT-A, S5:DiP, S5:DiP-A, S5:OT, S5:OT-A                                                     |
| 624 | No          | 9       | 9-B  | 1000   | McF_6 | Inf | unif   | wholeT_0.5  | J1:CBN, J1:CBN-A, J1:DiP, J1:DiP-A, J1:OT, J1:OT-A, J5:CBN-A, J5:DiP, J5:DiP-A, J5:OT, J5:OT-A, S1:DiP, S1:DiP-A, S1:OT, S1:OT-A, S5:DiP, S5:DiP-A, S5:OT, S5:OT-A                   |
| 625 | No          | 9       | 9-B  | 200    | Bozic | 0   | last   | singleC     | S1:OT, S1:OT-A                                                                                                                                                                       |
| 626 | No          | 9       | 9-B  | 200    | Bozic | 0   | last   | wholeT_0.01 | J1:OT, J1:OT-A, S5:OT, S5:OT-A                                                                                                                                                       |
| 627 | No          | 9       | 9-B  | 200    | Bozic | 0   | last   | wholeT_0.5  | S1:OT, S1:OT-A                                                                                                                                                                       |

Table 14: (continued)

|     | Conjunction | Drivers | Tree | S.Size | Model | sh  | S.Time | S.Type      | Best method(s)                                                                                                         |
|-----|-------------|---------|------|--------|-------|-----|--------|-------------|------------------------------------------------------------------------------------------------------------------------|
| 628 | No          | 9       | 9-B  | 200    | Bozic | 0   | unif   | singleC     | J1:CBN-A, S1:CBN, S1:CBN-A, S5:CBN, S5:CBN-A                                                                           |
| 629 | No          | 9       | 9-B  | 200    | Bozic | 0   | unif   | wholeT_0.01 | S1:DiP, S1:DiP-A                                                                                                       |
| 630 | No          | 9       | 9-B  | 200    | Bozic | 0   | unif   | wholeT_0.5  | S1:CBN, S1:CBN-A, S5:CBN                                                                                               |
| 631 | No          | 9       | 9-B  | 200    | Bozic | Inf | last   | singleC     | J1:OT, J1:OT-A, S5:OT, S5:OT-A                                                                                         |
| 632 | No          | 9       | 9-B  | 200    | Bozic | Inf | last   | wholeT_0.01 | J5:CBN-A, J5:OT, J5:OT-A                                                                                               |
| 633 | No          | 9       | 9-B  | 200    | Bozic | Inf | last   | wholeT_0.5  | J1:OT, J1:OT-A, J5:OT, J5:OT-A                                                                                         |
| 634 | No          | 9       | 9-B  | 200    | Bozic | Inf | unif   | singleC     | J1:CBN, J1:CBN-A, S1:OT, S1:OT-A                                                                                       |
| 635 | No          | 9       | 9-B  | 200    | Bozic | Inf | unif   | wholeT_0.01 | S5:CBN, S5:CBN-A, S5:OT, S5:OT-A                                                                                       |
| 636 | No          | 9       | 9-B  | 200    | Bozic | Inf | unif   | wholeT_0.5  | J1:CBN, J1:CBN-A, S1:OT, S1:OT-A                                                                                       |
| 637 | No          | 9       | 9-B  | 200    | exp   | 0   | last   | singleC     | S1:OT, S1:OT-A                                                                                                         |
| 638 | No          | 9       | 9-B  | 200    | exp   | 0   | last   | wholeT_0.01 | S1:OT, S1:OT-A                                                                                                         |
| 639 | No          | 9       | 9-B  | 200    | exp   | 0   | last   | wholeT_0.5  | S1:CBN, S1:CBN-A, S5:CBN                                                                                               |
| 640 | No          | 9       | 9-B  | 200    | exp   | 0   | unif   | singleC     | S1:CBN, S1:CBN-A, S5:CBN, S5:CBN-A                                                                                     |
| 641 | No          | 9       | 9-B  | 200    | exp   | 0   | unif   | wholeT_0.01 | J1:CBN, S1:CBN, S1:CBN-A, S5:CBN-A                                                                                     |
| 642 | No          | 9       | 9-B  | 200    | exp   | 0   | unif   | wholeT_0.5  | S1:CBN, S1:CBN-A, S5:CBN, S5:CBN-A                                                                                     |
| 643 | No          | 9       | 9-B  | 200    | exp   | Inf | last   | singleC     | J1:OT, J1:OT-A, S5:OT, S5:OT-A                                                                                         |
| 644 | No          | 9       | 9-B  | 200    | exp   | Inf | last   | wholeT_0.01 | J5:CBN-A, J5:OT, J5:OT-A                                                                                               |
| 645 | No          | 9       | 9-B  | 200    | exp   | Inf | last   | wholeT_0.5  | J1:OT, J1:OT-A, S5:OT, S5:OT-A                                                                                         |
| 646 | No          | 9       | 9-B  | 200    | exp   | Inf | unif   | singleC     | S1:OT, S1:OT-A                                                                                                         |
| 647 | No          | 9       | 9-B  | 200    | exp   | Inf | unif   | wholeT_0.01 | J1:CBN-A, J1:OT, J1:OT-A, S5:CBN, S5:CBN-A                                                                             |
| 648 | No          | 9       | 9-B  | 200    | exp   | Inf | unif   | wholeT_0.5  | S1:OT, S1:OT-A                                                                                                         |
| 649 | No          | 9       | 9-B  | 200    | McF_4 | 0   | last   | singleC     | J1:OT, J1:OT-A, J5:OT, J5:OT-A, S5:DiP-A, S5:OT, S5:OT-A                                                               |
| 650 | No          | 9       | 9-B  | 200    | McF_4 | 0   | last   | wholeT_0.01 | J1:DiP, J1:DiP-A, J1:OT, J1:OT-A, J5:DiP, J5:DiP-A, J5:OT, J5:OT-A, S1:DiP, S1:DiP-A, S5:DiP, S5:DiP-A, S5:OT, S5:OT-A |
| 651 | No          | 9       | 9-B  | 200    | McF_4 | 0   | last   | wholeT_0.5  | J1:OT, J1:OT-A, J5:DiP-A, J5:OT, J5:OT-A, S1:DiP, S1:DiP-A, S5:DiP, S5:DiP-A, S5:OT, S5:OT-A                           |
| 652 | No          | 9       | 9-B  | 200    | McF_4 | 0   | unif   | singleC     | J1:OT, J1:OT-A, S5:OT, S5:OT-A                                                                                         |
| 653 | No          | 9       | 9-B  | 200    | McF_4 | 0   | unif   | wholeT_0.01 | J1:DiP, J1:DiP-A, J1:OT, J1:OT-A, S1:DiP, S1:DiP-A, S5:CBN-A, S5:DiP, S5:DiP-A, S5:OT, S5:OT-A                         |
| 654 | No          | 9       | 9-B  | 200    | McF_4 | 0   | unif   | wholeT_0.5  | J1:OT, J1:OT-A, S5:OT, S5:OT-A                                                                                         |
| 655 | No          | 9       | 9-B  | 200    | McF_4 | Inf | last   | singleC     | J1:OT, J1:OT-A, J5:OT, J5:OT-A, S5:OT, S5:OT-A                                                                         |

Table 14: (continued)

|     | Conjunction | Drivers | Tree | S.Size | Model | sh  | S.Time | S.Type      | Best method(s)                                                                                                                                     |
|-----|-------------|---------|------|--------|-------|-----|--------|-------------|----------------------------------------------------------------------------------------------------------------------------------------------------|
| 656 | No          | 9       | 9-B  | 200    | McF_4 | Inf | last   | wholeT_0.01 | J1:DiP-A, J1:OT, J1:OT-A, J5:OT, J5:OT-A, S5:OT, S5:OT-A                                                                                           |
| 657 | No          | 9       | 9-B  | 200    | McF_4 | Inf | last   | wholeT_0.5  | J1:OT, J1:OT-A, J5:OT, J5:OT-A, S1:DiP-A, S5:DiP-A, S5:OT, S5:OT-A                                                                                 |
| 658 | No          | 9       | 9-B  | 200    | McF_4 | Inf | unif   | singleC     | J1:OT, J1:OT-A, S5:OT, S5:OT-A                                                                                                                     |
| 659 | No          | 9       | 9-B  | 200    | McF_4 | Inf | unif   | wholeT_0.01 | J1:OT, J1:OT-A, S5:OT, S5:OT-A                                                                                                                     |
| 660 | No          | 9       | 9-B  | 200    | McF_4 | Inf | unif   | wholeT_0.5  | J1:OT, J1:OT-A, S5:OT, S5:OT-A                                                                                                                     |
| 661 | No          | 9       | 9-B  | 200    | McF_6 | 0   | last   | singleC     | J1:DiP, J1:OT, J5:OT, S1:DiP, S5:DiP, S5:OT                                                                                                        |
| 662 | No          | 9       | 9-B  | 200    | McF_6 | 0   | last   | wholeT_0.01 | J1:DiP, J1:OT, J5:DiP, J5:OT, S1:DiP, S5:DiP, S5:OT                                                                                                |
| 663 | No          | 9       | 9-B  | 200    | McF_6 | 0   | last   | wholeT_0.5  | J1:OT, J5:OT, S1:DiP, S5:DiP, S5:OT                                                                                                                |
| 664 | No          | 9       | 9-B  | 200    | McF_6 | 0   | unif   | singleC     | J1:CBN, J1:CBN-A, J1:DiP-A, J1:OT, J1:OT-A, J5:CBN, J5:CBN-A, J5:OT, J5:OT-A, S1:DiP, S1:DiP-A, S5:CBN, S5:CBN-A, S5:DiP, S5:DiP-A, S5:OT, S5:OT-A |
| 665 | No          | 9       | 9-B  | 200    | McF_6 | 0   | unif   | wholeT_0.01 | J1:CBN-A, J1:DiP, J1:DiP-A, J1:OT, J1:OT-A, J5:CBN, J5:CBN-A, J5:DiP, J5:DiP-A, J5:OT, J5:OT-A, S1:DiP, S1:DiP-A, S5:DiP, S5:DiP-A, S5:OT, S5:OT-A |
| 666 | No          | 9       | 9-B  | 200    | McF_6 | 0   | unif   | wholeT_0.5  | J1:CBN, J1:CBN-A, J1:DiP-A, J1:OT, J1:OT-A, J5:CBN-A, J5:DiP-A, J5:OT, J5:OT-A, S1:DiP-A, S5:CBN, S5:CBN-A, S5:DiP, S5:DiP-A, S5:OT, S5:OT-A       |
| 667 | No          | 9       | 9-B  | 200    | McF_6 | Inf | last   | singleC     | J1:OT, J5:OT, S1:DiP, S5:DiP, S5:OT                                                                                                                |
| 668 | No          | 9       | 9-B  | 200    | McF_6 | Inf | last   | wholeT_0.01 | J1:OT, J5:OT, S1:DiP, S5:DiP, S5:OT                                                                                                                |
| 669 | No          | 9       | 9-B  | 200    | McF_6 | Inf | last   | wholeT_0.5  | J1:OT, J5:OT, S1:DiP, S5:DiP, S5:OT                                                                                                                |
| 670 | No          | 9       | 9-B  | 200    | McF_6 | Inf | unif   | singleC     | J1:CBN, J1:CBN-A, J1:OT, J1:OT-A, J5:CBN-A, J5:OT, J5:OT-A, S5:CBN, S5:OT, S5:OT-A                                                                 |
| 671 | No          | 9       | 9-B  | 200    | McF_6 | Inf | unif   | wholeT_0.01 | J1:CBN, J1:CBN-A, J1:OT, J1:OT-A, J5:CBN-A, J5:OT, J5:OT-A, S5:CBN, S5:CBN-A, S5:OT, S5:OT-A                                                       |
| 672 | No          | 9       | 9-B  | 200    | McF_6 | Inf | unif   | wholeT_0.5  | J1:CBN, J1:CBN-A, J1:DiP-A, J1:OT, J1:OT-A, J5:CBN-A, J5:OT, J5:OT-A, S5:CBN, S5:CBN-A, S5:DiP-A, S5:OT, S5:OT-A                                   |
| 673 | No          | 9       | 9-B  | 100    | Bozic | 0   | last   | singleC     | S1:OT, S1:OT-A                                                                                                                                     |

Table 14: (continued)

|     | Conjunction | Drivers | Tree | S.Size | Model | sh  | S.Time | S.Type      | Best method(s)                                                                                |
|-----|-------------|---------|------|--------|-------|-----|--------|-------------|-----------------------------------------------------------------------------------------------|
| 674 | No          | 9       | 9-B  | 100    | Bozic | 0   | last   | wholeT_0.01 | S5:OT, S5:OT-A                                                                                |
| 675 | No          | 9       | 9-B  | 100    | Bozic | 0   | last   | wholeT_0.5  | S1:OT, S1:OT-A                                                                                |
| 676 | No          | 9       | 9-B  | 100    | Bozic | 0   | unif   | singleC     | J1:CBN, S1:OT, S1:OT-A                                                                        |
| 677 | No          | 9       | 9-B  | 100    | Bozic | 0   | unif   | wholeT_0.01 | J1:CBN-A, J1:OT, J1:OT-A                                                                      |
| 678 | No          | 9       | 9-B  | 100    | Bozic | 0   | unif   | wholeT_0.5  | J1:CBN, J1:CBN-A, S1:CBN, S1:CBN-A, S5:CBN                                                    |
| 679 | No          | 9       | 9-B  | 100    | Bozic | Inf | last   | singleC     | J5:OT, J5:OT-A                                                                                |
| 680 | No          | 9       | 9-B  | 100    | Bozic | Inf | last   | wholeT_0.01 | J5:OT, J5:OT-A                                                                                |
| 681 | No          | 9       | 9-B  | 100    | Bozic | Inf | last   | wholeT_0.5  | J5:OT, J5:OT-A                                                                                |
| 682 | No          | 9       | 9-B  | 100    | Bozic | Inf | unif   | singleC     | J1:CBN, J1:CBN-A, J1:OT, J1:OT-A, S1:OT, S1:OT-A, S5:CBN, S5:CBN-A                            |
| 683 | No          | 9       | 9-B  | 100    | Bozic | Inf | unif   | wholeT_0.01 | J5:CBN, J5:CBN-A, S5:CBN, S5:CBN-A, S5:OT, S5:OT-A                                            |
| 684 | No          | 9       | 9-B  | 100    | Bozic | Inf | unif   | wholeT_0.5  | J1:CBN, J1:CBN-A, J1:OT, J1:OT-A, S1:OT, S1:OT-A                                              |
| 685 | No          | 9       | 9-B  | 100    | exp   | 0   | last   | singleC     | S1:OT, S1:OT-A                                                                                |
| 686 | No          | 9       | 9-B  | 100    | exp   | 0   | last   | wholeT_0.01 | S1:OT, S5:OT, S5:OT-A                                                                         |
| 687 | No          | 9       | 9-B  | 100    | exp   | 0   | last   | wholeT_0.5  | S1:OT, S1:OT-A                                                                                |
| 688 | No          | 9       | 9-B  | 100    | exp   | 0   | unif   | singleC     | J1:CBN, J1:CBN-A, S1:CBN, S1:CBN-A, S5:CBN, S5:CBN-A                                          |
| 689 | No          | 9       | 9-B  | 100    | exp   | 0   | unif   | wholeT_0.01 | S1:OT, S1:OT-A                                                                                |
| 690 | No          | 9       | 9-B  | 100    | exp   | 0   | unif   | wholeT_0.5  | S1:CBN, S1:CBN-A, S5:CBN, S5:CBN-A                                                            |
| 691 | No          | 9       | 9-B  | 100    | exp   | Inf | last   | singleC     | S5:OT, S5:OT-A                                                                                |
| 692 | No          | 9       | 9-B  | 100    | exp   | Inf | last   | wholeT_0.01 | J5:CBN-A, J5:OT, J5:OT-A                                                                      |
| 693 | No          | 9       | 9-B  | 100    | exp   | Inf | last   | wholeT_0.5  | S5:OT, S5:OT-A                                                                                |
| 694 | No          | 9       | 9-B  | 100    | exp   | Inf | unif   | singleC     | S1:OT, S1:OT-A                                                                                |
| 695 | No          | 9       | 9-B  | 100    | exp   | Inf | unif   | wholeT_0.01 | J1:CBN, J1:CBN-A, J1:OT, J1:OT-A, J5:CBN, J5:CBN-A, S1:OT, S1:OT-A, S5:CBN, S5:CBN-A          |
| 696 | No          | 9       | 9-B  | 100    | exp   | Inf | unif   | wholeT_0.5  | S1:OT, S1:OT-A                                                                                |
| 697 | No          | 9       | 9-B  | 100    | McF_4 | 0   | last   | singleC     | J5:OT, J5:OT-A, S5:OT, S5:OT-A                                                                |
| 698 | No          | 9       | 9-B  | 100    | McF_4 | 0   | last   | wholeT_0.01 | J1:DiP, J1:DiP-A, J1:OT-A, J5:OT, J5:OT-A, S1:DiP, S1:DiP-A, S5:DiP, S5:DiP-A, S5:OT, S5:OT-A |
| 699 | No          | 9       | 9-B  | 100    | McF_4 | 0   | last   | wholeT_0.5  | J1:OT, J1:OT-A, J5:OT, J5:OT-A, S5:OT, S5:OT-A                                                |
| 700 | No          | 9       | 9-B  | 100    | McF_4 | 0   | unif   | singleC     | J1:OT, J1:OT-A, S5:OT, S5:OT-A                                                                |
| 701 | No          | 9       | 9-B  | 100    | McF_4 | 0   | unif   | wholeT_0.01 | J1:OT, S1:DiP, S1:DiP-A, S5:DiP-A, S5:OT, S5:OT-A                                             |
| 702 | No          | 9       | 9-B  | 100    | McF_4 | 0   | unif   | wholeT_0.5  | J1:OT, J1:OT-A, S5:OT, S5:OT-A                                                                |

Table 14: (continued)

|     | Conjunction | Drivers | Tree | S.Size | Model | sh  | S.Time | S.Type      | Best method(s)                                                                                                                  |
|-----|-------------|---------|------|--------|-------|-----|--------|-------------|---------------------------------------------------------------------------------------------------------------------------------|
| 703 | No          | 9       | 9-B  | 100    | McF_4 | Inf | last   | singleC     | J1:OT, J1:OT-A, J5:OT, J5:OT-A, S5:OT, S5:OT-A                                                                                  |
| 704 | No          | 9       | 9-B  | 100    | McF_4 | Inf | last   | wholeT_0.01 | J5:OT, J5:OT-A, S5:OT, S5:OT-A                                                                                                  |
| 705 | No          | 9       | 9-B  | 100    | McF_4 | Inf | last   | wholeT_0.5  | J1:OT, J1:OT-A, J5:OT, J5:OT-A, S5:OT, S5:OT-A                                                                                  |
| 706 | No          | 9       | 9-B  | 100    | McF_4 | Inf | unif   | singleC     | J1:OT, J1:OT-A, S5:OT, S5:OT-A                                                                                                  |
| 707 | No          | 9       | 9-B  | 100    | McF_4 | Inf | unif   | wholeT_0.01 | S5:OT, S5:OT-A                                                                                                                  |
| 708 | No          | 9       | 9-B  | 100    | McF_4 | Inf | unif   | wholeT_0.5  | J1:OT, J1:OT-A, S5:OT, S5:OT-A                                                                                                  |
| 709 | No          | 9       | 9-B  | 100    | McF_6 | 0   | last   | singleC     | J1:OT, J5:OT, S5:OT                                                                                                             |
| 710 | No          | 9       | 9-B  | 100    | McF_6 | 0   | last   | wholeT_0.01 | J1:DiP, J5:OT, S1:DiP, S5:OT                                                                                                    |
| 711 | No          | 9       | 9-B  | 100    | McF_6 | 0   | last   | wholeT_0.5  | J1:OT, J5:OT, S5:OT                                                                                                             |
| 712 | No          | 9       | 9-B  | 100    | McF_6 | 0   | unif   | singleC     | J1:CBN, J1:CBN-A, J1:OT, J1:OT-A, J5:CBN, J5:CBN-A, J5:OT, J5:OT-A, S5:CBN-A, S5:OT, S5:OT-A                                    |
| 713 | No          | 9       | 9-B  | 100    | McF_6 | 0   | unif   | wholeT_0.01 | J1:CBN, J1:CBN-A, J1:DiP, J1:DiP-A, J1:OT, J5:CBN-A, J5:OT, J5:OT-A, S1:DiP, S1:DiP-A, S5:CBN, S5:DiP, S5:DiP-A, S5:OT, S5:OT-A |
| 714 | No          | 9       | 9-B  | 100    | McF_6 | 0   | unif   | wholeT_0.5  | J1:CBN, J1:CBN-A, J5:CBN-A, J5:OT, J5:OT-A, S5:CBN, S5:CBN-A, S5:OT, S5:OT-A                                                    |
| 715 | No          | 9       | 9-B  | 100    | McF_6 | Inf | last   | singleC     | J1:OT, J5:OT, S5:OT                                                                                                             |
| 716 | No          | 9       | 9-B  | 100    | McF_6 | Inf | last   | wholeT_0.01 | J5:OT, S5:OT                                                                                                                    |
| 717 | No          | 9       | 9-B  | 100    | McF_6 | Inf | last   | wholeT_0.5  | J1:OT, J5:OT, S5:OT                                                                                                             |
| 718 | No          | 9       | 9-B  | 100    | McF_6 | Inf | unif   | singleC     | J1:CBN, J1:CBN-A, J1:OT, J5:CBN-A, J5:OT, J5:OT-A, S5:OT, S5:OT-A                                                               |
| 719 | No          | 9       | 9-B  | 100    | McF_6 | Inf | unif   | wholeT_0.01 | J5:CBN-A, J5:OT, J5:OT-A, S5:CBN, S5:CBN-A, S5:OT, S5:OT-A                                                                      |
| 720 | No          | 9       | 9-B  | 100    | McF_6 | Inf | unif   | wholeT_0.5  | J1:CBN, J1:CBN-A, J1:OT, J5:CBN-A, J5:OT, S5:CBN, S5:CBN-A, S5:OT, S5:OT-A                                                      |
| 721 | No          | 7       | 7-B  | 1000   | Bozic | 0   | last   | singleC     | J1:CBN-A, J1:OT-A, J5:CBN-A, J5:OT-A, S1:OT-A, S5:OT-A                                                                          |
| 722 | No          | 7       | 7-B  | 1000   | Bozic | 0   | last   | wholeT_0.01 | J1:DiP-A, J1:OT-A, J5:DiP-A, J5:OT-A, S1:DiP-A, S1:OT-A, S5:DiP-A, S5:OT-A                                                      |
| 723 | No          | 7       | 7-B  | 1000   | Bozic | 0   | last   | wholeT_0.5  | J1:CBN-A, J1:OT-A, J5:CBN-A, J5:OT-A, S1:OT-A, S5:CBN, S5:CBN-A, S5:OT-A                                                        |
| 724 | No          | 7       | 7-B  | 1000   | Bozic | 0   | unif   | singleC     | J1:CBN, J1:CBN-A, J1:OT, J1:OT-A, S1:CBN, S1:CBN-A, S1:OT                                                                       |

Table 14: (continued)

|     | Conjunction | Drivers | Tree | S.Size | Model | sh  | S.Time | S.Type      | Best method(s)                                                                                       |
|-----|-------------|---------|------|--------|-------|-----|--------|-------------|------------------------------------------------------------------------------------------------------|
| 725 | No          | 7       | 7-B  | 1000   | Bozic | 0   | unif   | wholeT_0.01 | J5:CBN, J5:CBN-A, J5:DiP-A, J5:OT, J5:OT-A                                                           |
| 726 | No          | 7       | 7-B  | 1000   | Bozic | 0   | unif   | wholeT_0.5  | NA                                                                                                   |
| 727 | No          | 7       | 7-B  | 1000   | Bozic | Inf | last   | singleC     | J1:DiP-A, J1:OT-A, J5:DiP-A, J5:OT-A, S1:DiP-A, S5:DiP-A, S5:OT-A                                    |
| 728 | No          | 7       | 7-B  | 1000   | Bozic | Inf | last   | wholeT_0.01 | J5:CBN, J5:CBN-A, J5:DiP, J5:DiP-A, J5:OT, J5:OT-A                                                   |
| 729 | No          | 7       | 7-B  | 1000   | Bozic | Inf | last   | wholeT_0.5  | J1:DiP-A, J1:OT-A, J5:CBN, J5:DiP-A, J5:OT-A, S5:DiP-A, S5:OT-A                                      |
| 730 | No          | 7       | 7-B  | 1000   | Bozic | Inf | unif   | singleC     | J1:CBN, J1:CBN-A, J5:CBN, J5:CBN-A, J5:OT, J5:OT-A, S1:CBN, S1:CBN-A, S5:CBN, S5:CBN-A, S5:OT        |
| 731 | No          | 7       | 7-B  | 1000   | Bozic | Inf | unif   | wholeT_0.01 | J1:CBN-A, J1:OT, J1:OT-A, J5:CBN, J5:CBN-A, S5:CBN, S5:CBN-A                                         |
| 732 | No          | 7       | 7-B  | 1000   | Bozic | Inf | unif   | wholeT_0.5  | J1:CBN, J1:CBN-A, J1:OT, J1:OT-A, S1:CBN, S1:CBN-A                                                   |
| 733 | No          | 7       | 7-B  | 1000   | exp   | 0   | last   | singleC     | J1:CBN-A, J1:OT-A, S1:OT-A                                                                           |
| 734 | No          | 7       | 7-B  | 1000   | exp   | 0   | last   | wholeT_0.01 | J1:CBN, J1:CBN-A, J1:OT-A, J5:CBN-A, J5:OT-A, S1:CBN, S1:CBN-A, S1:OT-A, S5:CBN, S5:OT-A             |
| 735 | No          | 7       | 7-B  | 1000   | exp   | 0   | last   | wholeT_0.5  | J1:CBN-A, J1:OT-A, S1:OT-A                                                                           |
| 736 | No          | 7       | 7-B  | 1000   | exp   | 0   | unif   | singleC     | NA                                                                                                   |
| 737 | No          | 7       | 7-B  | 1000   | exp   | 0   | unif   | wholeT_0.01 | J1:CBN, J1:CBN-A, J1:OT-A                                                                            |
| 738 | No          | 7       | 7-B  | 1000   | exp   | 0   | unif   | wholeT_0.5  | NA                                                                                                   |
| 739 | No          | 7       | 7-B  | 1000   | exp   | Inf | last   | singleC     | J1:OT-A, J5:CBN-A, J5:OT-A, S1:OT-A, S5:OT-A                                                         |
| 740 | No          | 7       | 7-B  | 1000   | exp   | Inf | last   | wholeT_0.01 | J1:CBN, J1:CBN-A, J1:OT, J1:OT-A, J5:CBN-A, J5:DiP-A, J5:OT-A, S5:CBN, S5:CBN-A, S5:OT, S5:OT-A      |
| 741 | No          | 7       | 7-B  | 1000   | exp   | Inf | last   | wholeT_0.5  | J1:CBN, J1:OT-A, J5:CBN-A, J5:OT-A, S1:OT-A, S5:OT-A                                                 |
| 742 | No          | 7       | 7-B  | 1000   | exp   | Inf | unif   | singleC     | J1:CBN, J1:CBN-A, J1:OT, J1:OT-A, S1:CBN, S1:CBN-A                                                   |
| 743 | No          | 7       | 7-B  | 1000   | exp   | Inf | unif   | wholeT_0.01 | J1:CBN, J1:CBN-A, J1:OT, J1:OT-A, J5:CBN, J5:CBN-A, J5:OT, J5:OT-A, S5:CBN, S5:CBN-A, S5:OT, S5:OT-A |
| 744 | No          | 7       | 7-B  | 1000   | exp   | Inf | unif   | wholeT_0.5  | J1:CBN, J1:CBN-A, J1:OT, J1:OT-A, S1:CBN-A                                                           |



Table 14: (continued)

|     | Conjunction | Drivers | Tree | S.Size | Model | sh  | S.Time | S.Type      | Best method(s)                                                                                                                                                               |
|-----|-------------|---------|------|--------|-------|-----|--------|-------------|------------------------------------------------------------------------------------------------------------------------------------------------------------------------------|
| 745 | No          | 7       | 7-B  | 1000   | McF_4 | 0   | last   | singleC     | J1:DiP-A, J1:OT-A, J5:DiP-A, J5:OT-A, S1:DiP, S1:DiP-A, S1:OT, S1:OT-A, S5:DiP, S5:DiP-A, S5:OT, S5:OT-A                                                                     |
| 746 | No          | 7       | 7-B  | 1000   | McF_4 | 0   | last   | wholeT_0.01 | J1:DiP, J1:DiP-A, J1:OT, J1:OT-A, J5:DiP-A, J5:OT-A, S1:DiP, S1:DiP-A, S5:DiP, S5:DiP-A, S5:OT, S5:OT-A                                                                      |
| 747 | No          | 7       | 7-B  | 1000   | McF_4 | 0   | last   | wholeT_0.5  | J1:DiP-A, J1:OT-A, J5:DiP-A, J5:OT-A, S1:DiP, S1:DiP-A, S1:OT, S1:OT-A, S5:DiP, S5:DiP-A, S5:OT, S5:OT-A                                                                     |
| 748 | No          | 7       | 7-B  | 1000   | McF_4 | 0   | unif   | singleC     | J1:CBN-A, J1:DiP, J1:DiP-A, J1:OT, J1:OT-A, J5:CBN, J5:CBN-A, J5:DiP, J5:DiP-A, J5:OT, J5:OT-A, S1:DiP, S1:DiP-A, S1:OT, S1:OT-A, S5:CBN-A, S5:DiP, S5:DiP-A, S5:OT, S5:OT-A |
| 749 | No          | 7       | 7-B  | 1000   | McF_4 | 0   | unif   | wholeT_0.01 | J1:CBN, J1:DiP, J1:DiP-A, J1:OT, J1:OT-A, J5:CBN, J5:DiP, J5:DiP-A, J5:OT, J5:OT-A, S1:DiP, S1:DiP-A, S5:CBN, S5:CBN-A, S5:DiP, S5:DiP-A, S5:OT, S5:OT-A                     |
| 750 | No          | 7       | 7-B  | 1000   | McF_4 | 0   | unif   | wholeT_0.5  | J1:CBN-A, J1:DiP, J1:DiP-A, J1:OT, J1:OT-A, J5:CBN, J5:CBN-A, J5:DiP, J5:DiP-A, J5:OT, J5:OT-A, S1:DiP, S1:DiP-A, S1:OT, S5:CBN-A, S5:DiP, S5:DiP-A, S5:OT, S5:OT-A          |
| 751 | No          | 7       | 7-B  | 1000   | McF_4 | Inf | last   | singleC     | J1:DiP-A, J1:OT-A, J5:DiP-A, J5:OT-A, S1:DiP, S1:OT-A, S5:DiP, S5:DiP-A, S5:OT, S5:OT-A                                                                                      |
| 752 | No          | 7       | 7-B  | 1000   | McF_4 | Inf | last   | wholeT_0.01 | J1:DiP, J1:DiP-A, J1:OT, J1:OT-A, J5:DiP-A, J5:OT-A, S1:DiP, S1:DiP-A, S5:DiP, S5:DiP-A, S5:OT, S5:OT-A                                                                      |
| 753 | No          | 7       | 7-B  | 1000   | McF_4 | Inf | last   | wholeT_0.5  | J1:DiP-A, J1:OT-A, J5:DiP-A, J5:OT-A, S1:DiP, S1:DiP-A, S1:OT, S1:OT-A, S5:DiP, S5:DiP-A, S5:OT, S5:OT-A                                                                     |
| 754 | No          | 7       | 7-B  | 1000   | McF_4 | Inf | unif   | singleC     | J1:CBN-A, J1:DiP-A, J1:OT, J1:OT-A, J5:CBN-A, J5:DiP-A, J5:OT, J5:OT-A, S1:DiP, S1:DiP-A, S1:OT, S1:OT-A, S5:CBN-A, S5:DiP-A, S5:OT, S5:OT-A                                 |
| 755 | No          | 7       | 7-B  | 1000   | McF_4 | Inf | unif   | wholeT_0.01 | J1:DiP-A, J1:OT, J1:OT-A, J5:CBN-A, J5:DiP-A, J5:OT, J5:OT-A, S1:DiP, S1:DiP-A, S5:DiP-A, S5:OT, S5:OT-A                                                                     |

Table 14: (continued)

|     | Conjunction | Drivers | Tree | S.Size | Model | sh  | S.Time | S.Type      | Best method(s)                                                                                                                                                                                       |
|-----|-------------|---------|------|--------|-------|-----|--------|-------------|------------------------------------------------------------------------------------------------------------------------------------------------------------------------------------------------------|
| 756 | No          | 7       | 7-B  | 1000   | McF_4 | Inf | unif   | wholeT_0.5  | J1:DiP-A, J1:OT, J1:OT-A, J5:CBN-A, J5:DiP-A, J5:OT, J5:OT-A, S1:DiP, S1:DiP-A, S1:OT, S1:OT-A, S5:DiP-A, S5:OT, S5:OT-A                                                                             |
| 757 | No          | 7       | 7-B  | 1000   | McF_6 | 0   | last   | singleC     | J1:DiP, J1:DiP-A, J1:OT, J1:OT-A, J5:DiP, J5:DiP-A, J5:OT, J5:OT-A, S1:DiP, S1:DiP-A, S5:DiP, S5:DiP-A, S5:OT, S5:OT-A                                                                               |
| 758 | No          | 7       | 7-B  | 1000   | McF_6 | 0   | last   | wholeT_0.01 | J1:DiP, J1:DiP-A, J5:DiP, J5:DiP-A, J5:OT, J5:OT-A, S1:DiP, S1:DiP-A, S5:DiP, S5:DiP-A, S5:OT, S5:OT-A                                                                                               |
| 759 | No          | 7       | 7-B  | 1000   | McF_6 | 0   | last   | wholeT_0.5  | J1:DiP, J1:DiP-A, J1:OT, J1:OT-A, J5:DiP, J5:DiP-A, J5:OT, J5:OT-A, S1:DiP, S1:DiP-A, S1:OT, S1:OT-A, S5:DiP, S5:DiP-A, S5:OT, S5:OT-A                                                               |
| 760 | No          | 7       | 7-B  | 1000   | McF_6 | 0   | unif   | singleC     | J1:CBN, J1:DiP, J1:DiP-A, J1:OT, J1:OT-A, J5:CBN, J5:CBN-A, J5:DiP, J5:DiP-A, J5:OT, J5:OT-A, S1:CBN, S1:CBN-A, S1:DiP, S1:DiP-A, S1:OT, S1:OT-A, S5:CBN, S5:CBN-A, S5:DiP, S5:DiP-A, S5:OT, S5:OT-A |
| 761 | No          | 7       | 7-B  | 1000   | McF_6 | 0   | unif   | wholeT_0.01 | J1:CBN, J1:CBN-A, J1:DiP, J1:DiP-A, J1:OT, J1:OT-A, J5:CBN, J5:CBN-A, J5:DiP, J5:DiP-A, J5:OT, J5:OT-A, S1:DiP, S1:DiP-A, S5:CBN, S5:CBN-A, S5:DiP, S5:DiP-A, S5:OT, S5:OT-A                         |
| 762 | No          | 7       | 7-B  | 1000   | McF_6 | 0   | unif   | wholeT_0.5  | none                                                                                                                                                                                                 |
| 763 | No          | 7       | 7-B  | 1000   | McF_6 | Inf | last   | singleC     | J1:DiP, J1:DiP-A, J1:OT, J1:OT-A, J5:DiP, J5:DiP-A, J5:OT, J5:OT-A, S1:DiP-A, S5:DiP, S5:DiP-A, S5:OT, S5:OT-A                                                                                       |
| 764 | No          | 7       | 7-B  | 1000   | McF_6 | Inf | last   | wholeT_0.01 | J1:DiP-A, J5:DiP-A, J5:OT, J5:OT-A, S5:DiP-A, S5:OT, S5:OT-A                                                                                                                                         |
| 765 | No          | 7       | 7-B  | 1000   | McF_6 | Inf | last   | wholeT_0.5  | J1:DiP, J1:DiP-A, J1:OT, J1:OT-A, J5:DiP, J5:DiP-A, J5:OT, J5:OT-A, S1:DiP, S1:DiP-A, S5:DiP, S5:DiP-A, S5:OT, S5:OT-A                                                                               |

Table 14: (continued)

|     | Conjunction | Drivers | Tree | S.Size | Model | sh  | S.Time | S.Type      | Best method(s)                                                                                                                                                                                       |
|-----|-------------|---------|------|--------|-------|-----|--------|-------------|------------------------------------------------------------------------------------------------------------------------------------------------------------------------------------------------------|
| 766 | No          | 7       | 7-B  | 1000   | McF_6 | Inf | unif   | singleC     | J1:CBN, J1:CBN-A, J1:DiP, J1:DiP-A, J1:OT, J1:OT-A, J5:CBN-A, J5:DiP-A, J5:OT, J5:OT-A, S1:CBN, S1:CBN-A, S1:DiP, S1:DiP-A, S1:OT, S1:OT-A, S5:CBN, S5:CBN-A, S5:DiP, S5:DiP-A, S5:OT, S5:OT-A       |
| 767 | No          | 7       | 7-B  | 1000   | McF_6 | Inf | unif   | wholeT_0.01 | J1:CBN, J1:CBN-A, J1:DiP, J1:DiP-A, J1:OT, J1:OT-A, J5:CBN, J5:CBN-A, J5:DiP, J5:DiP-A, J5:OT, J5:OT-A, S1:DiP-A, S5:CBN, S5:CBN-A, S5:DiP, S5:DiP-A, S5:OT, S5:OT-A                                 |
| 768 | No          | 7       | 7-B  | 1000   | McF_6 | Inf | unif   | wholeT_0.5  | J1:CBN, J1:CBN-A, J1:DiP, J1:DiP-A, J1:OT, J1:OT-A, J5:CBN, J5:CBN-A, J5:DiP, J5:DiP-A, J5:OT, J5:OT-A, S1:CBN, S1:DiP, S1:DiP-A, S1:OT, S1:OT-A, S5:CBN, S5:CBN-A, S5:DiP, S5:DiP-A, S5:OT, S5:OT-A |
| 769 | No          | 7       | 7-B  | 200    | Bozic | 0   | last   | singleC     | J1:CBN-A, J1:OT-A, J5:CBN-A, J5:OT-A, S5:CBN, S5:OT-A                                                                                                                                                |
| 770 | No          | 7       | 7-B  | 200    | Bozic | 0   | last   | wholeT_0.01 | J1:OT-A, J5:OT-A, S5:OT-A                                                                                                                                                                            |
| 771 | No          | 7       | 7-B  | 200    | Bozic | 0   | last   | wholeT_0.5  | J1:CBN-A, J1:OT-A, J5:CBN-A, J5:OT-A, S1:OT-A, S5:CBN, S5:CBN-A, S5:OT-A                                                                                                                             |
| 772 | No          | 7       | 7-B  | 200    | Bozic | 0   | unif   | singleC     | J1:CBN, J1:CBN-A, J1:OT, J1:OT-A, S1:OT, S1:OT-A                                                                                                                                                     |
| 773 | No          | 7       | 7-B  | 200    | Bozic | 0   | unif   | wholeT_0.01 | J5:CBN, J5:CBN-A, J5:OT, J5:OT-A                                                                                                                                                                     |
| 774 | No          | 7       | 7-B  | 200    | Bozic | 0   | unif   | wholeT_0.5  | J1:OT, J1:OT-A, S1:CBN-A, S1:OT, S1:OT-A                                                                                                                                                             |
| 775 | No          | 7       | 7-B  | 200    | Bozic | Inf | last   | singleC     | J5:CBN, J5:OT-A, S5:OT-A                                                                                                                                                                             |
| 776 | No          | 7       | 7-B  | 200    | Bozic | Inf | last   | wholeT_0.01 | J5:CBN, J5:CBN-A, J5:OT, J5:OT-A                                                                                                                                                                     |
| 777 | No          | 7       | 7-B  | 200    | Bozic | Inf | last   | wholeT_0.5  | J5:CBN, J5:OT-A, S5:OT-A                                                                                                                                                                             |
| 778 | No          | 7       | 7-B  | 200    | Bozic | Inf | unif   | singleC     | J1:CBN, J1:CBN-A, J5:CBN, J5:CBN-A, J5:OT, J5:OT-A, S5:CBN, S5:CBN-A                                                                                                                                 |
| 779 | No          | 7       | 7-B  | 200    | Bozic | Inf | unif   | wholeT_0.01 | J5:CBN, J5:CBN-A, J5:OT, J5:OT-A, S5:CBN, S5:CBN-A, S5:OT, S5:OT-A                                                                                                                                   |
| 780 | No          | 7       | 7-B  | 200    | Bozic | Inf | unif   | wholeT_0.5  | J1:CBN, J1:CBN-A                                                                                                                                                                                     |
| 781 | No          | 7       | 7-B  | 200    | exp   | 0   | last   | singleC     | S1:OT-A                                                                                                                                                                                              |
| 782 | No          | 7       | 7-B  | 200    | exp   | 0   | last   | wholeT_0.01 | J1:CBN, J1:CBN-A, J1:OT-A, J5:CBN-A, J5:OT-A, S1:CBN, S1:CBN-A, S1:OT-A, S5:CBN, S5:CBN-A, S5:OT-A                                                                                                   |

Table 14: (continued)

|     | Conjunction | Drivers | Tree | S.Size | Model | sh  | S.Time | S.Type      | Best method(s)                                                                                                                                       |
|-----|-------------|---------|------|--------|-------|-----|--------|-------------|------------------------------------------------------------------------------------------------------------------------------------------------------|
| 783 | No          | 7       | 7-B  | 200    | exp   | 0   | last   | wholeT_0.5  | J1:CBN-A, J1:OT-A, S1:OT-A                                                                                                                           |
| 784 | No          | 7       | 7-B  | 200    | exp   | 0   | unif   | singleC     | NA                                                                                                                                                   |
| 785 | No          | 7       | 7-B  | 200    | exp   | 0   | unif   | wholeT_0.01 | J1:CBN-A, J1:OT-A                                                                                                                                    |
| 786 | No          | 7       | 7-B  | 200    | exp   | 0   | unif   | wholeT_0.5  | NA                                                                                                                                                   |
| 787 | No          | 7       | 7-B  | 200    | exp   | Inf | last   | singleC     | J1:OT-A, J5:CBN-A, J5:OT-A, S5:OT-A                                                                                                                  |
| 788 | No          | 7       | 7-B  | 200    | exp   | Inf | last   | wholeT_0.01 | J5:CBN, J5:CBN-A, J5:OT-A, S5:CBN, S5:CBN-A, S5:OT-A                                                                                                 |
| 789 | No          | 7       | 7-B  | 200    | exp   | Inf | last   | wholeT_0.5  | J1:CBN, J1:OT-A, J5:CBN-A, J5:OT-A, S5:OT-A                                                                                                          |
| 790 | No          | 7       | 7-B  | 200    | exp   | Inf | unif   | singleC     | J1:CBN, J1:CBN-A, J1:OT, J1:OT-A                                                                                                                     |
| 791 | No          | 7       | 7-B  | 200    | exp   | Inf | unif   | wholeT_0.01 | J5:CBN, J5:CBN-A, J5:OT, J5:OT-A, S5:CBN, S5:CBN-A, S5:OT, S5:OT-A                                                                                   |
| 792 | No          | 7       | 7-B  | 200    | exp   | Inf | unif   | wholeT_0.5  | J1:CBN, J1:CBN-A, J1:OT, J1:OT-A, S1:CBN, S1:CBN-A                                                                                                   |
| 793 | No          | 7       | 7-B  | 200    | McF_4 | 0   | last   | singleC     | J1:OT-A, J5:OT-A, S5:OT, S5:OT-A                                                                                                                     |
| 794 | No          | 7       | 7-B  | 200    | McF_4 | 0   | last   | wholeT_0.01 | J1:DiP, J1:DiP-A, J1:OT, J5:OT-A, S1:DiP, S1:DiP-A, S5:DiP, S5:DiP-A, S5:OT, S5:OT-A                                                                 |
| 795 | No          | 7       | 7-B  | 200    | McF_4 | 0   | last   | wholeT_0.5  | J1:OT-A, J5:OT-A, S5:OT, S5:OT-A                                                                                                                     |
| 796 | No          | 7       | 7-B  | 200    | McF_4 | 0   | unif   | singleC     | J1:CBN, J1:CBN-A, J1:DiP-A, J1:OT, J1:OT-A, J5:CBN, J5:CBN-A, J5:OT, J5:OT-A, S1:DiP-A, S5:CBN, S5:CBN-A, S5:DiP-A, S5:OT, S5:OT-A                   |
| 797 | No          | 7       | 7-B  | 200    | McF_4 | 0   | unif   | wholeT_0.01 | J1:CBN, J1:CBN-A, J1:DiP-A, J1:OT, J1:OT-A, J5:CBN, J5:CBN-A, J5:DiP-A, J5:OT, J5:OT-A, S1:DiP, S1:DiP-A, S5:CBN, S5:CBN-A, S5:DiP-A, S5:OT, S5:OT-A |
| 798 | No          | 7       | 7-B  | 200    | McF_4 | 0   | unif   | wholeT_0.5  | J1:CBN, J1:CBN-A, J1:OT, J1:OT-A, J5:CBN, J5:CBN-A, J5:OT, J5:OT-A, S5:CBN, S5:CBN-A, S5:OT, S5:OT-A                                                 |
| 799 | No          | 7       | 7-B  | 200    | McF_4 | Inf | last   | singleC     | J1:OT-A, J5:OT-A, S5:OT, S5:OT-A                                                                                                                     |
| 800 | No          | 7       | 7-B  | 200    | McF_4 | Inf | last   | wholeT_0.01 | J1:OT, J1:OT-A, J5:OT-A, S5:OT, S5:OT-A                                                                                                              |
| 801 | No          | 7       | 7-B  | 200    | McF_4 | Inf | last   | wholeT_0.5  | J1:OT-A, S5:OT, S5:OT-A                                                                                                                              |
| 802 | No          | 7       | 7-B  | 200    | McF_4 | Inf | unif   | singleC     | J1:OT, J1:OT-A, J5:CBN-A, J5:OT, J5:OT-A, S5:OT, S5:OT-A                                                                                             |
| 803 | No          | 7       | 7-B  | 200    | McF_4 | Inf | unif   | wholeT_0.01 | J1:OT, J1:OT-A, J5:CBN-A, J5:OT, J5:OT-A, S5:OT, S5:OT-A                                                                                             |

Table 14: (continued)

|     | Conjunction | Drivers | Tree | S.Size | Model | sh  | S.Time | S.Type      | Best method(s)                                                                                                                                                       |
|-----|-------------|---------|------|--------|-------|-----|--------|-------------|----------------------------------------------------------------------------------------------------------------------------------------------------------------------|
| 804 | No          | 7       | 7-B  | 200    | McF_4 | Inf | unif   | wholeT_0.5  | J1:CBN-A, J1:OT, J1:OT-A, J5:CBN-A, J5:OT, J5:OT-A, S5:CBN-A, S5:OT, S5:OT-A                                                                                         |
| 805 | No          | 7       | 7-B  | 200    | McF_6 | 0   | last   | singleC     | J1:DiP-A, J1:OT, J1:OT-A, J5:DiP-A, J5:OT, J5:OT-A, S1:DiP-A, S5:DiP-A, S5:OT, S5:OT-A                                                                               |
| 806 | No          | 7       | 7-B  | 200    | McF_6 | 0   | last   | wholeT_0.01 | J1:DiP, J1:DiP-A, J5:DiP, J5:DiP-A, J5:OT, J5:OT-A, S1:DiP, S1:DiP-A, S5:DiP, S5:DiP-A, S5:OT, S5:OT-A                                                               |
| 807 | No          | 7       | 7-B  | 200    | McF_6 | 0   | last   | wholeT_0.5  | J1:DiP-A, J1:OT, J1:OT-A, J5:DiP-A, J5:OT, J5:OT-A, S5:DiP-A, S5:OT, S5:OT-A                                                                                         |
| 808 | No          | 7       | 7-B  | 200    | McF_6 | 0   | unif   | singleC     | J1:CBN, J1:CBN-A, J1:DiP, J1:DiP-A, J1:OT, J1:OT-A, J5:CBN, J5:CBN-A, J5:DiP-A, J5:OT, J5:OT-A, S1:DiP, S1:DiP-A, S5:CBN, S5:CBN-A, S5:DiP, S5:DiP-A, S5:OT, S5:OT-A |
| 809 | No          | 7       | 7-B  | 200    | McF_6 | 0   | unif   | wholeT_0.01 | J1:CBN, J1:CBN-A, J1:DiP, J1:DiP-A, J1:OT, J1:OT-A, J5:CBN, J5:CBN-A, J5:OT, J5:OT-A, S1:DiP, S1:DiP-A, S5:CBN, S5:CBN-A, S5:DiP, S5:DiP-A, S5:OT, S5:OT-A           |
| 810 | No          | 7       | 7-B  | 200    | McF_6 | 0   | unif   | wholeT_0.5  | J1:CBN, J1:CBN-A, J1:DiP, J1:DiP-A, J1:OT, J1:OT-A, J5:CBN, J5:CBN-A, J5:DiP-A, J5:OT, J5:OT-A, S1:DiP, S5:CBN, S5:CBN-A, S5:DiP, S5:DiP-A, S5:OT, S5:OT-A           |
| 811 | No          | 7       | 7-B  | 200    | McF_6 | Inf | last   | singleC     | J1:DiP-A, J1:OT, J1:OT-A, J5:DiP-A, J5:OT, J5:OT-A, S1:DiP-A, S5:DiP-A, S5:OT, S5:OT-A                                                                               |
| 812 | No          | 7       | 7-B  | 200    | McF_6 | Inf | last   | wholeT_0.01 | J5:OT, J5:OT-A, S5:OT, S5:OT-A                                                                                                                                       |
| 813 | No          | 7       | 7-B  | 200    | McF_6 | Inf | last   | wholeT_0.5  | J1:DiP-A, J1:OT, J1:OT-A, J5:DiP-A, J5:OT, J5:OT-A, S1:DiP-A, S5:DiP-A, S5:OT, S5:OT-A                                                                               |
| 814 | No          | 7       | 7-B  | 200    | McF_6 | Inf | unif   | singleC     | J1:CBN, J1:CBN-A, J1:OT, J1:OT-A, J5:CBN, J5:CBN-A, J5:OT, J5:OT-A, S5:CBN, S5:CBN-A, S5:OT, S5:OT-A                                                                 |

Table 14: (continued)

|     | Conjunction | Drivers | Tree | S.Size | Model | sh  | S.Time | S.Type      | Best method(s)                                                                                                                              |
|-----|-------------|---------|------|--------|-------|-----|--------|-------------|---------------------------------------------------------------------------------------------------------------------------------------------|
| 815 | No          | 7       | 7-B  | 200    | McF_6 | Inf | unif   | wholeT_0.01 | J1:CBN, J1:CBN-A, J1:DiP-A, J5:CBN, J5:CBN-A, J5:OT-A, S1:DiP, S1:DiP-A, S5:CBN, S5:CBN-A, S5:DiP-A, S5:OT, S5:OT-A                         |
| 816 | No          | 7       | 7-B  | 200    | McF_6 | Inf | unif   | wholeT_0.5  | J1:CBN, J1:CBN-A, J1:DiP-A, J1:OT, J1:OT-A, J5:CBN, J5:CBN-A, J5:OT-A, S1:DiP, S1:DiP-A, S5:CBN, S5:CBN-A, S5:DiP, S5:DiP-A, S5:OT, S5:OT-A |
| 817 | No          | 7       | 7-B  | 100    | Bozic | 0   | last   | singleC     | J1:CBN-A, J1:OT-A, J5:CBN-A, J5:OT-A, S5:CBN, S5:OT-A                                                                                       |
| 818 | No          | 7       | 7-B  | 100    | Bozic | 0   | last   | wholeT_0.01 | J5:OT-A, S5:CBN, S5:OT-A                                                                                                                    |
| 819 | No          | 7       | 7-B  | 100    | Bozic | 0   | last   | wholeT_0.5  | J5:OT-A, S5:CBN, S5:CBN-A, S5:OT-A                                                                                                          |
| 820 | No          | 7       | 7-B  | 100    | Bozic | 0   | unif   | singleC     | J1:CBN, J1:CBN-A, J1:OT, J1:OT-A                                                                                                            |
| 821 | No          | 7       | 7-B  | 100    | Bozic | 0   | unif   | wholeT_0.01 | J5:CBN, J5:CBN-A, J5:OT, J5:OT-A                                                                                                            |
| 822 | No          | 7       | 7-B  | 100    | Bozic | 0   | unif   | wholeT_0.5  | J1:CBN, J1:CBN-A, J1:OT, J1:OT-A, S1:OT, S1:OT-A                                                                                            |
| 823 | No          | 7       | 7-B  | 100    | Bozic | Inf | last   | singleC     | J5:CBN, J5:OT-A, S5:OT, S5:OT-A                                                                                                             |
| 824 | No          | 7       | 7-B  | 100    | Bozic | Inf | last   | wholeT_0.01 | J5:CBN, J5:CBN-A, J5:OT-A                                                                                                                   |
| 825 | No          | 7       | 7-B  | 100    | Bozic | Inf | last   | wholeT_0.5  | J5:CBN, J5:OT-A, S5:OT-A                                                                                                                    |
| 826 | No          | 7       | 7-B  | 100    | Bozic | Inf | unif   | singleC     | J5:CBN, J5:CBN-A, J5:OT, J5:OT-A, S5:CBN, S5:CBN-A                                                                                          |
| 827 | No          | 7       | 7-B  | 100    | Bozic | Inf | unif   | wholeT_0.01 | J5:CBN, J5:CBN-A, J5:OT, J5:OT-A, S5:CBN-A                                                                                                  |
| 828 | No          | 7       | 7-B  | 100    | Bozic | Inf | unif   | wholeT_0.5  | J5:CBN, J5:CBN-A, J5:OT, J5:OT-A, S5:CBN, S5:CBN-A, S5:OT, S5:OT-A                                                                          |
| 829 | No          | 7       | 7-B  | 100    | exp   | 0   | last   | singleC     | J1:OT-A                                                                                                                                     |
| 830 | No          | 7       | 7-B  | 100    | exp   | 0   | last   | wholeT_0.01 | J1:CBN, J1:CBN-A, J1:OT-A, J5:CBN-A, J5:OT-A, S1:CBN, S5:CBN-A                                                                              |
| 831 | No          | 7       | 7-B  | 100    | exp   | 0   | last   | wholeT_0.5  | J1:OT-A, S1:OT-A                                                                                                                            |
| 832 | No          | 7       | 7-B  | 100    | exp   | 0   | unif   | singleC     | J1:OT, J1:OT-A, S1:CBN, S1:CBN-A, S1:OT, S1:OT-A                                                                                            |
| 833 | No          | 7       | 7-B  | 100    | exp   | 0   | unif   | wholeT_0.01 | J1:CBN, J1:CBN-A, J1:OT, J1:OT-A, S1:OT, S1:OT-A                                                                                            |
| 834 | No          | 7       | 7-B  | 100    | exp   | 0   | unif   | wholeT_0.5  | NA                                                                                                                                          |
| 835 | No          | 7       | 7-B  | 100    | exp   | Inf | last   | singleC     | J1:OT-A, J5:CBN-A, J5:OT-A, S5:OT-A                                                                                                         |
| 836 | No          | 7       | 7-B  | 100    | exp   | Inf | last   | wholeT_0.01 | J5:CBN, J5:CBN-A, J5:OT-A                                                                                                                   |
| 837 | No          | 7       | 7-B  | 100    | exp   | Inf | last   | wholeT_0.5  | J1:OT-A, J5:CBN-A, J5:OT-A, S5:OT-A                                                                                                         |
| 838 | No          | 7       | 7-B  | 100    | exp   | Inf | unif   | singleC     | J1:CBN, J1:CBN-A, J1:OT, J1:OT-A                                                                                                            |
| 839 | No          | 7       | 7-B  | 100    | exp   | Inf | unif   | wholeT_0.01 | J5:CBN, J5:CBN-A, J5:OT, J5:OT-A, S5:CBN, S5:OT, S5:OT-A                                                                                    |

Table 14: (continued)

|     | Conjunction | Drivers | Tree | S.Size | Model | sh  | S.Time | S.Type      | Best method(s)                                                                                                 |
|-----|-------------|---------|------|--------|-------|-----|--------|-------------|----------------------------------------------------------------------------------------------------------------|
| 840 | No          | 7       | 7-B  | 100    | exp   | Inf | unif   | wholeT_0.5  | J1:CBN, J1:CBN-A, J1:OT, S1:OT, S1:OT-A                                                                        |
| 841 | No          | 7       | 7-B  | 100    | McF_4 | 0   | last   | singleC     | J1:OT-A, J5:OT-A, S5:OT, S5:OT-A                                                                               |
| 842 | No          | 7       | 7-B  | 100    | McF_4 | 0   | last   | wholeT_0.01 | J5:OT-A, S1:DiP, S1:DiP-A, S5:DiP-A, S5:OT, S5:OT-A                                                            |
| 843 | No          | 7       | 7-B  | 100    | McF_4 | 0   | last   | wholeT_0.5  | J5:OT-A, S5:OT, S5:OT-A                                                                                        |
| 844 | No          | 7       | 7-B  | 100    | McF_4 | 0   | unif   | singleC     | J1:CBN-A, J5:CBN, J5:CBN-A, J5:OT, J5:OT-A, S5:CBN, S5:CBN-A                                                   |
| 845 | No          | 7       | 7-B  | 100    | McF_4 | 0   | unif   | wholeT_0.01 | J1:CBN, J1:CBN-A, J1:OT, J1:OT-A, J5:CBN, J5:CBN-A, J5:OT, J5:OT-A, S1:DiP-A, S5:CBN, S5:CBN-A, S5:OT, S5:OT-A |
| 846 | No          | 7       | 7-B  | 100    | McF_4 | 0   | unif   | wholeT_0.5  | J1:CBN-A, J1:OT-A, J5:CBN, J5:CBN-A, J5:OT, J5:OT-A, S5:CBN-A, S5:OT, S5:OT-A                                  |
| 847 | No          | 7       | 7-B  | 100    | McF_4 | Inf | last   | singleC     | J5:OT-A, S5:OT, S5:OT-A                                                                                        |
| 848 | No          | 7       | 7-B  | 100    | McF_4 | Inf | last   | wholeT_0.01 | J5:OT-A, S5:OT, S5:OT-A                                                                                        |
| 849 | No          | 7       | 7-B  | 100    | McF_4 | Inf | last   | wholeT_0.5  | J5:OT-A, S5:OT-A                                                                                               |
| 850 | No          | 7       | 7-B  | 100    | McF_4 | Inf | unif   | singleC     | J1:CBN-A, J1:OT, J1:OT-A, J5:CBN-A, J5:OT, J5:OT-A, S5:OT, S5:OT-A                                             |
| 851 | No          | 7       | 7-B  | 100    | McF_4 | Inf | unif   | wholeT_0.01 | J1:CBN-A, J1:OT-A, J5:CBN-A, J5:OT, J5:OT-A, S5:CBN-A, S5:OT, S5:OT-A                                          |
| 852 | No          | 7       | 7-B  | 100    | McF_4 | Inf | unif   | wholeT_0.5  | J1:CBN-A, J5:CBN-A, J5:OT, J5:OT-A, S5:CBN-A                                                                   |
| 853 | No          | 7       | 7-B  | 100    | McF_6 | 0   | last   | singleC     | J5:OT, J5:OT-A, S5:OT, S5:OT-A                                                                                 |
| 854 | No          | 7       | 7-B  | 100    | McF_6 | 0   | last   | wholeT_0.01 | J5:OT, J5:OT-A                                                                                                 |
| 855 | No          | 7       | 7-B  | 100    | McF_6 | 0   | last   | wholeT_0.5  | J5:OT, J5:OT-A, S5:OT, S5:OT-A                                                                                 |
| 856 | No          | 7       | 7-B  | 100    | McF_6 | 0   | unif   | singleC     | J1:CBN, J1:CBN-A, J1:OT, J1:OT-A, J5:CBN, J5:CBN-A, J5:OT, J5:OT-A, S1:DiP, S5:CBN, S5:CBN-A, S5:OT, S5:OT-A   |
| 857 | No          | 7       | 7-B  | 100    | McF_6 | 0   | unif   | wholeT_0.01 | J1:DiP-A, J5:CBN, J5:CBN-A, J5:DiP-A, S1:DiP, S5:CBN, S5:CBN-A, S5:DiP, S5:DiP-A                               |
| 858 | No          | 7       | 7-B  | 100    | McF_6 | 0   | unif   | wholeT_0.5  | J1:CBN, J1:CBN-A, J5:CBN, J5:CBN-A, S5:CBN, S5:CBN-A                                                           |
| 859 | No          | 7       | 7-B  | 100    | McF_6 | Inf | last   | singleC     | J5:OT, J5:OT-A, S5:OT-A                                                                                        |
| 860 | No          | 7       | 7-B  | 100    | McF_6 | Inf | last   | wholeT_0.01 | J5:OT, J5:OT-A, S5:OT, S5:OT-A                                                                                 |
| 861 | No          | 7       | 7-B  | 100    | McF_6 | Inf | last   | wholeT_0.5  | J5:OT, J5:OT-A, S5:OT, S5:OT-A                                                                                 |

Table 14: *(continued)*

|     | Conjunction | Drivers | Tree | S.Size | Model | sh  | S.Time | S.Type      | Best method(s)                                                            |
|-----|-------------|---------|------|--------|-------|-----|--------|-------------|---------------------------------------------------------------------------|
| 862 | No          | 7       | 7-B  | 100    | McF_6 | Inf | unif   | singleC     | J1:CBN, J1:CBN-A, J5:CBN, J5:CBN-A,<br>J5:OT-A, S5:CBN, S5:CBN-A, S5:OT-A |
| 863 | No          | 7       | 7-B  | 100    | McF_6 | Inf | unif   | wholeT_0.01 | J5:CBN, J5:CBN-A, S5:CBN, S5:CBN-A                                        |
| 864 | No          | 7       | 7-B  | 100    | McF_6 | Inf | unif   | wholeT_0.5  | J1:CBN, J1:CBN-A, J5:CBN, J5:CBN-A,<br>S5:CBN, S5:CBN-A                   |



### 5.3 Confidence sets (MCB), PND, Drivers Unknown

Table 15: Confidence sets (method MCB) when Drivers are Unknown for measure PND.

|    | Conjunction | Drivers | Tree | S.Size | Model | sh  | S.Time | S.Type      | Best method(s)                                                                                                                                                                                       |
|----|-------------|---------|------|--------|-------|-----|--------|-------------|------------------------------------------------------------------------------------------------------------------------------------------------------------------------------------------------------|
| 1  | Yes         | 11      | 11-A | 1000   | Bozic | 0   | last   | singleC     | S1:OT, S1:OT-A                                                                                                                                                                                       |
| 2  | Yes         | 11      | 11-A | 1000   | Bozic | 0   | last   | wholeT_0.01 | S1:DiP, S1:DiP-A, S1:OT, S1:OT-A, S5:DiP, S5:DiP-A, S5:OT, S5:OT-A                                                                                                                                   |
| 3  | Yes         | 11      | 11-A | 1000   | Bozic | 0   | last   | wholeT_0.5  | S1:OT, S1:OT-A                                                                                                                                                                                       |
| 4  | Yes         | 11      | 11-A | 1000   | Bozic | 0   | unif   | singleC     | J1:CBN, J1:DiP, J1:OT, J5:CBN-A, S1:CBN, S1:CBN-A, S1:DiP, S1:DiP-A, S1:OT, S1:OT-A                                                                                                                  |
| 5  | Yes         | 11      | 11-A | 1000   | Bozic | 0   | unif   | wholeT_0.01 | S1:CBN, S1:CBN-A                                                                                                                                                                                     |
| 6  | Yes         | 11      | 11-A | 1000   | Bozic | 0   | unif   | wholeT_0.5  | J1:CBN, J1:CBN-A, J1:DiP, J1:DiP-A, J1:OT, J1:OT-A, J5:CBN, J5:DiP, J5:DiP-A, J5:OT, J5:OT-A, S1:CBN, S1:CBN-A, S1:DiP, S1:DiP-A, S1:OT, S1:OT-A, S5:CBN, S5:CBN-A, S5:DiP, S5:DiP-A, S5:OT, S5:OT-A |
| 7  | Yes         | 11      | 11-A | 1000   | Bozic | Inf | last   | singleC     | S1:DiP, S1:DiP-A, S1:OT, S1:OT-A, S5:DiP, S5:DiP-A, S5:OT, S5:OT-A                                                                                                                                   |
| 8  | Yes         | 11      | 11-A | 1000   | Bozic | Inf | last   | wholeT_0.01 | J1:OT, J1:OT-A, S1:DiP, S1:OT, S1:OT-A, S5:DiP, S5:DiP-A, S5:OT, S5:OT-A                                                                                                                             |
| 9  | Yes         | 11      | 11-A | 1000   | Bozic | Inf | last   | wholeT_0.5  | S1:OT, S1:OT-A                                                                                                                                                                                       |
| 10 | Yes         | 11      | 11-A | 1000   | Bozic | Inf | unif   | singleC     | S1:OT, S1:OT-A                                                                                                                                                                                       |
| 11 | Yes         | 11      | 11-A | 1000   | Bozic | Inf | unif   | wholeT_0.01 | S1:CBN, S1:CBN-A, S1:DiP, S1:DiP-A, S1:OT, S1:OT-A, S5:CBN-A, S5:DiP, S5:DiP-A, S5:OT, S5:OT-A                                                                                                       |
| 12 | Yes         | 11      | 11-A | 1000   | Bozic | Inf | unif   | wholeT_0.5  | S1:OT, S1:OT-A                                                                                                                                                                                       |
| 13 | Yes         | 11      | 11-A | 1000   | exp   | 0   | last   | singleC     | S1:CBN, S1:OT, S1:OT-A                                                                                                                                                                               |
| 14 | Yes         | 11      | 11-A | 1000   | exp   | 0   | last   | wholeT_0.01 | S1:DiP-A, S1:OT, S1:OT-A, S5:OT, S5:OT-A                                                                                                                                                             |
| 15 | Yes         | 11      | 11-A | 1000   | exp   | 0   | last   | wholeT_0.5  | S1:OT, S1:OT-A                                                                                                                                                                                       |
| 16 | Yes         | 11      | 11-A | 1000   | exp   | 0   | unif   | singleC     | none                                                                                                                                                                                                 |
| 17 | Yes         | 11      | 11-A | 1000   | exp   | 0   | unif   | wholeT_0.01 | S1:CBN, S1:CBN-A, S1:OT, S1:OT-A                                                                                                                                                                     |
| 18 | Yes         | 11      | 11-A | 1000   | exp   | 0   | unif   | wholeT_0.5  | J1:CBN-A, J1:DiP, J1:DiP-A, J1:OT, J5:CBN, J5:CBN-A, J5:DiP, J5:DiP-A, J5:OT, J5:OT-A, S1:CBN-A, S1:DiP, S1:DiP-A, S1:OT, S1:OT-A, S5:CBN, S5:CBN-A, S5:DiP, S5:DiP-A, S5:OT, S5:OT-A                |
| 19 | Yes         | 11      | 11-A | 1000   | exp   | Inf | last   | singleC     | S1:CBN-A, S1:DiP-A, S1:OT, S1:OT-A                                                                                                                                                                   |

Table 15: (continued)

|    | Conjunction | Drivers | Tree | S.Size | Model | sh  | S.Time | S.Type      | Best method(s)                                                                                       |
|----|-------------|---------|------|--------|-------|-----|--------|-------------|------------------------------------------------------------------------------------------------------|
| 20 | Yes         | 11      | 11-A | 1000   | exp   | Inf | last   | wholeT_0.01 | J1:DiP, J1:DiP-A, J1:OT, J1:OT-A, S1:DiP, S1:DiP-A, S1:OT, S1:OT-A, S5:DiP, S5:DiP-A, S5:OT, S5:OT-A |
| 21 | Yes         | 11      | 11-A | 1000   | exp   | Inf | last   | wholeT_0.5  | S1:CBN, S1:DiP, S1:DiP-A, S1:OT, S1:OT-A, S5:DiP, S5:DiP-A, S5:OT, S5:OT-A                           |
| 22 | Yes         | 11      | 11-A | 1000   | exp   | Inf | unif   | singleC     | S1:CBN-A, S1:OT, S1:OT-A                                                                             |
| 23 | Yes         | 11      | 11-A | 1000   | exp   | Inf | unif   | wholeT_0.01 | S1:CBN, S1:CBN-A, S1:DiP-A, S1:OT, S1:OT-A                                                           |
| 24 | Yes         | 11      | 11-A | 1000   | exp   | Inf | unif   | wholeT_0.5  | S1:OT, S1:OT-A                                                                                       |
| 25 | Yes         | 11      | 11-A | 1000   | McF_4 | 0   | last   | singleC     | S1:DiP-A, S1:OT, S1:OT-A                                                                             |
| 26 | Yes         | 11      | 11-A | 1000   | McF_4 | 0   | last   | wholeT_0.01 | S1:DiP-A, S1:OT, S1:OT-A                                                                             |
| 27 | Yes         | 11      | 11-A | 1000   | McF_4 | 0   | last   | wholeT_0.5  | S1:DiP-A, S1:OT, S1:OT-A                                                                             |
| 28 | Yes         | 11      | 11-A | 1000   | McF_4 | 0   | unif   | singleC     | S1:DiP, S1:DiP-A, S1:OT, S1:OT-A                                                                     |
| 29 | Yes         | 11      | 11-A | 1000   | McF_4 | 0   | unif   | wholeT_0.01 | S1:CBN, S1:CBN-A, S1:DiP-A, S1:OT, S1:OT-A                                                           |
| 30 | Yes         | 11      | 11-A | 1000   | McF_4 | 0   | unif   | wholeT_0.5  | S1:DiP, S1:DiP-A, S1:OT, S1:OT-A, S5:DiP, S5:OT, S5:OT-A                                             |
| 31 | Yes         | 11      | 11-A | 1000   | McF_4 | Inf | last   | singleC     | S1:OT, S1:OT-A                                                                                       |
| 32 | Yes         | 11      | 11-A | 1000   | McF_4 | Inf | last   | wholeT_0.01 | S1:OT, S1:OT-A, S5:OT, S5:OT-A                                                                       |
| 33 | Yes         | 11      | 11-A | 1000   | McF_4 | Inf | last   | wholeT_0.5  | S1:DiP-A, S1:OT, S1:OT-A                                                                             |
| 34 | Yes         | 11      | 11-A | 1000   | McF_4 | Inf | unif   | singleC     | S1:OT, S1:OT-A                                                                                       |
| 35 | Yes         | 11      | 11-A | 1000   | McF_4 | Inf | unif   | wholeT_0.01 | S1:OT, S1:OT-A                                                                                       |
| 36 | Yes         | 11      | 11-A | 1000   | McF_4 | Inf | unif   | wholeT_0.5  | S1:CBN, S1:CBN-A, S1:OT, S1:OT-A                                                                     |
| 37 | Yes         | 11      | 11-A | 1000   | McF_6 | 0   | last   | singleC     | S1:DiP, S1:DiP-A                                                                                     |
| 38 | Yes         | 11      | 11-A | 1000   | McF_6 | 0   | last   | wholeT_0.01 | S1:DiP, S1:DiP-A, S5:DiP, S5:DiP-A                                                                   |
| 39 | Yes         | 11      | 11-A | 1000   | McF_6 | 0   | last   | wholeT_0.5  | S1:DiP, S1:DiP-A                                                                                     |
| 40 | Yes         | 11      | 11-A | 1000   | McF_6 | 0   | unif   | singleC     | S1:CBN, S1:CBN-A, S1:DiP, S1:DiP-A, S1:OT, S1:OT-A                                                   |
| 41 | Yes         | 11      | 11-A | 1000   | McF_6 | 0   | unif   | wholeT_0.01 | S1:CBN, S1:CBN-A, S1:DiP, S1:DiP-A, S1:OT, S1:OT-A                                                   |
| 42 | Yes         | 11      | 11-A | 1000   | McF_6 | 0   | unif   | wholeT_0.5  | S1:CBN, S1:CBN-A, S1:DiP, S1:DiP-A, S1:OT, S1:OT-A                                                   |
| 43 | Yes         | 11      | 11-A | 1000   | McF_6 | Inf | last   | singleC     | S1:DiP-A, S1:OT, S1:OT-A                                                                             |
| 44 | Yes         | 11      | 11-A | 1000   | McF_6 | Inf | last   | wholeT_0.01 | S1:DiP-A, S5:DiP-A                                                                                   |
| 45 | Yes         | 11      | 11-A | 1000   | McF_6 | Inf | last   | wholeT_0.5  | S1:DiP-A, S1:OT, S1:OT-A                                                                             |
| 46 | Yes         | 11      | 11-A | 1000   | McF_6 | Inf | unif   | singleC     | S1:CBN, S1:CBN-A, S1:DiP, S1:DiP-A, S1:OT, S1:OT-A                                                   |
| 47 | Yes         | 11      | 11-A | 1000   | McF_6 | Inf | unif   | wholeT_0.01 | S1:CBN, S1:CBN-A, S1:DiP, S1:DiP-A, S1:OT, S1:OT-A                                                   |

Table 15: (continued)

|    | Conjunction | Drivers | Tree | S.Size | Model | sh  | S.Time | S.Type      | Best method(s)                                                                                                                                                                                         |
|----|-------------|---------|------|--------|-------|-----|--------|-------------|--------------------------------------------------------------------------------------------------------------------------------------------------------------------------------------------------------|
| 48 | Yes         | 11      | 11-A | 1000   | McF_6 | Inf | unif   | wholeT_0.5  | S1:CBN, S1:CBN-A, S1:OT, S1:OT-A                                                                                                                                                                       |
| 49 | Yes         | 11      | 11-A | 200    | Bozic | 0   | last   | singleC     | S1:CBN, S1:CBN-A, S1:OT, S1:OT-A                                                                                                                                                                       |
| 50 | Yes         | 11      | 11-A | 200    | Bozic | 0   | last   | wholeT_0.01 | S1:CBN, S1:CBN-A, S1:OT, S1:OT-A                                                                                                                                                                       |
| 51 | Yes         | 11      | 11-A | 200    | Bozic | 0   | last   | wholeT_0.5  | S1:CBN, S1:CBN-A, S1:OT, S1:OT-A                                                                                                                                                                       |
| 52 | Yes         | 11      | 11-A | 200    | Bozic | 0   | unif   | singleC     | S1:CBN, S1:CBN-A, S1:OT, S1:OT-A                                                                                                                                                                       |
| 53 | Yes         | 11      | 11-A | 200    | Bozic | 0   | unif   | wholeT_0.01 | S1:CBN, S1:CBN-A                                                                                                                                                                                       |
| 54 | Yes         | 11      | 11-A | 200    | Bozic | 0   | unif   | wholeT_0.5  | J1:CBN, J1:CBN-A, J1:DiP, J1:DiP-A, J1:OT, J1:OT-A, J5:DiP-A, J5:OT, S1:CBN, S1:CBN-A, S1:DiP, S1:OT, S1:OT-A, S5:CBN, S5:CBN-A, S5:OT                                                                 |
| 55 | Yes         | 11      | 11-A | 200    | Bozic | Inf | last   | singleC     | S1:OT, S1:OT-A                                                                                                                                                                                         |
| 56 | Yes         | 11      | 11-A | 200    | Bozic | Inf | last   | wholeT_0.01 | J1:OT, J1:OT-A, S1:OT, S1:OT-A, S5:CBN-A, S5:OT, S5:OT-A                                                                                                                                               |
| 57 | Yes         | 11      | 11-A | 200    | Bozic | Inf | last   | wholeT_0.5  | S1:OT, S1:OT-A                                                                                                                                                                                         |
| 58 | Yes         | 11      | 11-A | 200    | Bozic | Inf | unif   | singleC     | S1:CBN, S1:CBN-A, S1:OT, S1:OT-A                                                                                                                                                                       |
| 59 | Yes         | 11      | 11-A | 200    | Bozic | Inf | unif   | wholeT_0.01 | S1:CBN, S1:CBN-A, S1:OT, S1:OT-A, S5:OT, S5:OT-A                                                                                                                                                       |
| 60 | Yes         | 11      | 11-A | 200    | Bozic | Inf | unif   | wholeT_0.5  | S1:OT, S1:OT-A                                                                                                                                                                                         |
| 61 | Yes         | 11      | 11-A | 200    | exp   | 0   | last   | singleC     | S1:OT, S1:OT-A                                                                                                                                                                                         |
| 62 | Yes         | 11      | 11-A | 200    | exp   | 0   | last   | wholeT_0.01 | S1:CBN-A, S1:OT, S1:OT-A, S5:OT, S5:OT-A                                                                                                                                                               |
| 63 | Yes         | 11      | 11-A | 200    | exp   | 0   | last   | wholeT_0.5  | S1:CBN-A, S1:OT, S1:OT-A                                                                                                                                                                               |
| 64 | Yes         | 11      | 11-A | 200    | exp   | 0   | unif   | singleC     | J1:CBN, J1:CBN-A, J1:DiP, J1:DiP-A, J1:OT, J1:OT-A, J5:CBN, J5:CBN-A, J5:DiP, J5:DiP-A, J5:OT, J5:OT-A, S1:CBN, S1:CBN-A, S1:DiP, S1:DiP-A, S1:OT, S1:OT-A, S5:CBN, S5:CBN-A, S5:DiP-A, S5:OT, S5:OT-A |
| 65 | Yes         | 11      | 11-A | 200    | exp   | 0   | unif   | wholeT_0.01 | S1:CBN, S1:CBN-A, S1:OT, S1:OT-A                                                                                                                                                                       |
| 66 | Yes         | 11      | 11-A | 200    | exp   | 0   | unif   | wholeT_0.5  | J1:CBN, J1:CBN-A, J1:DiP, J1:DiP-A, J1:OT, J1:OT-A, J5:CBN, J5:CBN-A, J5:DiP, J5:OT, J5:OT-A, S1:CBN, S1:OT, S1:OT-A, S5:CBN, S5:CBN-A, S5:DiP, S5:DiP-A, S5:OT, S5:OT-A                               |
| 67 | Yes         | 11      | 11-A | 200    | exp   | Inf | last   | singleC     | S1:OT, S1:OT-A, S5:OT, S5:OT-A                                                                                                                                                                         |
| 68 | Yes         | 11      | 11-A | 200    | exp   | Inf | last   | wholeT_0.01 | J1:CBN-A, J1:OT, J1:OT-A, S1:CBN, S1:CBN-A, S1:OT, S1:OT-A, S5:OT, S5:OT-A                                                                                                                             |
| 69 | Yes         | 11      | 11-A | 200    | exp   | Inf | last   | wholeT_0.5  | S1:CBN, S1:CBN-A, S1:OT-A                                                                                                                                                                              |
| 70 | Yes         | 11      | 11-A | 200    | exp   | Inf | unif   | singleC     | S1:OT, S1:OT-A                                                                                                                                                                                         |

Table 15: (continued)

|     | Conjunction | Drivers | Tree | S.Size | Model | sh  | S.Time | S.Type      | Best method(s)                                                                                       |
|-----|-------------|---------|------|--------|-------|-----|--------|-------------|------------------------------------------------------------------------------------------------------|
| 71  | Yes         | 11      | 11-A | 200    | exp   | Inf | unif   | wholeT_0.01 | S1:CBN, S1:CBN-A, S1:OT, S1:OT-A                                                                     |
| 72  | Yes         | 11      | 11-A | 200    | exp   | Inf | unif   | wholeT_0.5  | S1:CBN, S1:CBN-A, S1:OT, S1:OT-A                                                                     |
| 73  | Yes         | 11      | 11-A | 200    | McF_4 | 0   | last   | singleC     | S1:OT, S1:OT-A                                                                                       |
| 74  | Yes         | 11      | 11-A | 200    | McF_4 | 0   | last   | wholeT_0.01 | S1:CBN, S1:OT, S1:OT-A                                                                               |
| 75  | Yes         | 11      | 11-A | 200    | McF_4 | 0   | last   | wholeT_0.5  | S1:OT, S1:OT-A                                                                                       |
| 76  | Yes         | 11      | 11-A | 200    | McF_4 | 0   | unif   | singleC     | S1:CBN, S1:CBN-A, S1:OT, S1:OT-A                                                                     |
| 77  | Yes         | 11      | 11-A | 200    | McF_4 | 0   | unif   | wholeT_0.01 | S1:CBN, S1:CBN-A, S1:OT, S1:OT-A                                                                     |
| 78  | Yes         | 11      | 11-A | 200    | McF_4 | 0   | unif   | wholeT_0.5  | S1:OT, S1:OT-A                                                                                       |
| 79  | Yes         | 11      | 11-A | 200    | McF_4 | Inf | last   | singleC     | S1:OT, S1:OT-A                                                                                       |
| 80  | Yes         | 11      | 11-A | 200    | McF_4 | Inf | last   | wholeT_0.01 | S1:OT, S1:OT-A, S5:OT, S5:OT-A                                                                       |
| 81  | Yes         | 11      | 11-A | 200    | McF_4 | Inf | last   | wholeT_0.5  | S1:OT, S1:OT-A                                                                                       |
| 82  | Yes         | 11      | 11-A | 200    | McF_4 | Inf | unif   | singleC     | S1:OT, S1:OT-A                                                                                       |
| 83  | Yes         | 11      | 11-A | 200    | McF_4 | Inf | unif   | wholeT_0.01 | S1:OT, S1:OT-A                                                                                       |
| 84  | Yes         | 11      | 11-A | 200    | McF_4 | Inf | unif   | wholeT_0.5  | S1:OT, S1:OT-A                                                                                       |
| 85  | Yes         | 11      | 11-A | 200    | McF_6 | 0   | last   | singleC     | S1:OT, S1:OT-A, S5:OT, S5:OT-A                                                                       |
| 86  | Yes         | 11      | 11-A | 200    | McF_6 | 0   | last   | wholeT_0.01 | S1:OT, S1:OT-A, S5:OT, S5:OT-A                                                                       |
| 87  | Yes         | 11      | 11-A | 200    | McF_6 | 0   | last   | wholeT_0.5  | S1:OT, S1:OT-A                                                                                       |
| 88  | Yes         | 11      | 11-A | 200    | McF_6 | 0   | unif   | singleC     | S1:CBN, S1:OT, S1:OT-A                                                                               |
| 89  | Yes         | 11      | 11-A | 200    | McF_6 | 0   | unif   | wholeT_0.01 | S1:CBN, S1:CBN-A, S1:OT, S1:OT-A                                                                     |
| 90  | Yes         | 11      | 11-A | 200    | McF_6 | 0   | unif   | wholeT_0.5  | S1:CBN, S1:CBN-A, S1:OT, S1:OT-A                                                                     |
| 91  | Yes         | 11      | 11-A | 200    | McF_6 | Inf | last   | singleC     | S1:OT, S1:OT-A                                                                                       |
| 92  | Yes         | 11      | 11-A | 200    | McF_6 | Inf | last   | wholeT_0.01 | S1:OT, S1:OT-A, S5:OT, S5:OT-A                                                                       |
| 93  | Yes         | 11      | 11-A | 200    | McF_6 | Inf | last   | wholeT_0.5  | S1:OT, S1:OT-A                                                                                       |
| 94  | Yes         | 11      | 11-A | 200    | McF_6 | Inf | unif   | singleC     | S1:CBN, S1:OT, S1:OT-A                                                                               |
| 95  | Yes         | 11      | 11-A | 200    | McF_6 | Inf | unif   | wholeT_0.01 | S1:OT, S1:OT-A                                                                                       |
| 96  | Yes         | 11      | 11-A | 200    | McF_6 | Inf | unif   | wholeT_0.5  | S1:CBN-A, S1:OT, S1:OT-A                                                                             |
| 97  | Yes         | 11      | 11-A | 100    | Bozic | 0   | last   | singleC     | S1:CBN, S1:CBN-A, S1:OT, S1:OT-A                                                                     |
| 98  | Yes         | 11      | 11-A | 100    | Bozic | 0   | last   | wholeT_0.01 | S1:CBN, S1:OT, S1:OT-A                                                                               |
| 99  | Yes         | 11      | 11-A | 100    | Bozic | 0   | last   | wholeT_0.5  | S1:CBN-A, S1:OT, S1:OT-A                                                                             |
| 100 | Yes         | 11      | 11-A | 100    | Bozic | 0   | unif   | singleC     | S1:CBN, S1:CBN-A, S1:OT, S1:OT-A                                                                     |
| 101 | Yes         | 11      | 11-A | 100    | Bozic | 0   | unif   | wholeT_0.01 | S1:CBN, S1:CBN-A                                                                                     |
| 102 | Yes         | 11      | 11-A | 100    | Bozic | 0   | unif   | wholeT_0.5  | S1:CBN, S1:CBN-A, S1:OT, S1:OT-A                                                                     |
| 103 | Yes         | 11      | 11-A | 100    | Bozic | Inf | last   | singleC     | S1:CBN-A, S1:OT, S1:OT-A                                                                             |
| 104 | Yes         | 11      | 11-A | 100    | Bozic | Inf | last   | wholeT_0.01 | S1:OT, S1:OT-A, S5:CBN-A, S5:OT, S5:OT-A                                                             |
| 105 | Yes         | 11      | 11-A | 100    | Bozic | Inf | last   | wholeT_0.5  | S1:CBN, S1:CBN-A, S1:OT, S1:OT-A                                                                     |
| 106 | Yes         | 11      | 11-A | 100    | Bozic | Inf | unif   | singleC     | S1:CBN, S1:CBN-A, S1:OT, S1:OT-A                                                                     |
| 107 | Yes         | 11      | 11-A | 100    | Bozic | Inf | unif   | wholeT_0.01 | J1:CBN, J1:CBN-A, J1:OT, J1:OT-A, S1:CBN, S1:CBN-A, S1:OT, S1:OT-A, S5:CBN, S5:CBN-A, S5:OT, S5:OT-A |

Table 15: (continued)

|     | Conjunction | Drivers | Tree | S.Size | Model | sh  | S.Time | S.Type      | Best method(s)                                                                                                                                                                       |
|-----|-------------|---------|------|--------|-------|-----|--------|-------------|--------------------------------------------------------------------------------------------------------------------------------------------------------------------------------------|
| 108 | Yes         | 11      | 11-A | 100    | Bozic | Inf | unif   | wholeT_0.5  | S1:CBN, S1:CBN-A, S1:OT, S1:OT-A                                                                                                                                                     |
| 109 | Yes         | 11      | 11-A | 100    | exp   | 0   | last   | singleC     | S1:OT, S1:OT-A                                                                                                                                                                       |
| 110 | Yes         | 11      | 11-A | 100    | exp   | 0   | last   | wholeT_0.01 | S1:CBN, S1:CBN-A, S1:OT, S1:OT-A, S5:OT                                                                                                                                              |
| 111 | Yes         | 11      | 11-A | 100    | exp   | 0   | last   | wholeT_0.5  | S1:OT, S1:OT-A                                                                                                                                                                       |
| 112 | Yes         | 11      | 11-A | 100    | exp   | 0   | unif   | singleC     | J1:CBN, J1:OT, J1:OT-A, J5:OT, S1:CBN, S1:CBN-A, S1:OT, S1:OT-A, S5:CBN                                                                                                              |
| 113 | Yes         | 11      | 11-A | 100    | exp   | 0   | unif   | wholeT_0.01 | S1:CBN, S1:CBN-A, S1:OT, S1:OT-A                                                                                                                                                     |
| 114 | Yes         | 11      | 11-A | 100    | exp   | 0   | unif   | wholeT_0.5  | J1:CBN, J1:CBN-A, J1:DiP, J1:OT, J1:OT-A, J5:CBN, J5:CBN-A, J5:DiP, J5:DiP-A, J5:OT, S1:CBN, S1:CBN-A, S1:DiP, S1:DiP-A, S1:OT, S1:OT-A, S5:CBN, S5:CBN-A, S5:DiP, S5:DiP-A, S5:OT-A |
| 115 | Yes         | 11      | 11-A | 100    | exp   | Inf | last   | singleC     | S1:OT, S1:OT-A                                                                                                                                                                       |
| 116 | Yes         | 11      | 11-A | 100    | exp   | Inf | last   | wholeT_0.01 | J1:OT, J1:OT-A, S1:CBN-A, S1:OT, S1:OT-A, S5:CBN-A, S5:OT, S5:OT-A                                                                                                                   |
| 117 | Yes         | 11      | 11-A | 100    | exp   | Inf | last   | wholeT_0.5  | S1:OT, S1:OT-A                                                                                                                                                                       |
| 118 | Yes         | 11      | 11-A | 100    | exp   | Inf | unif   | singleC     | S1:CBN, S1:OT, S1:OT-A                                                                                                                                                               |
| 119 | Yes         | 11      | 11-A | 100    | exp   | Inf | unif   | wholeT_0.01 | J1:CBN, J1:CBN-A, S1:CBN, S1:CBN-A, S1:OT, S1:OT-A                                                                                                                                   |
| 120 | Yes         | 11      | 11-A | 100    | exp   | Inf | unif   | wholeT_0.5  | S1:CBN-A, S1:OT, S1:OT-A                                                                                                                                                             |
| 121 | Yes         | 11      | 11-A | 100    | McF_4 | 0   | last   | singleC     | S1:CBN, S1:OT, S1:OT-A                                                                                                                                                               |
| 122 | Yes         | 11      | 11-A | 100    | McF_4 | 0   | last   | wholeT_0.01 | S1:OT, S1:OT-A, S5:OT-A                                                                                                                                                              |
| 123 | Yes         | 11      | 11-A | 100    | McF_4 | 0   | last   | wholeT_0.5  | S1:OT, S1:OT-A                                                                                                                                                                       |
| 124 | Yes         | 11      | 11-A | 100    | McF_4 | 0   | unif   | singleC     | S1:CBN, S1:CBN-A, S1:OT, S1:OT-A                                                                                                                                                     |
| 125 | Yes         | 11      | 11-A | 100    | McF_4 | 0   | unif   | wholeT_0.01 | S1:CBN, S1:CBN-A, S1:OT, S1:OT-A                                                                                                                                                     |
| 126 | Yes         | 11      | 11-A | 100    | McF_4 | 0   | unif   | wholeT_0.5  | S1:CBN, S1:CBN-A, S1:OT, S1:OT-A                                                                                                                                                     |
| 127 | Yes         | 11      | 11-A | 100    | McF_4 | Inf | last   | singleC     | S1:OT, S1:OT-A                                                                                                                                                                       |
| 128 | Yes         | 11      | 11-A | 100    | McF_4 | Inf | last   | wholeT_0.01 | S1:OT, S1:OT-A, S5:OT, S5:OT-A                                                                                                                                                       |
| 129 | Yes         | 11      | 11-A | 100    | McF_4 | Inf | last   | wholeT_0.5  | S1:OT, S1:OT-A                                                                                                                                                                       |
| 130 | Yes         | 11      | 11-A | 100    | McF_4 | Inf | unif   | singleC     | S1:OT, S1:OT-A                                                                                                                                                                       |
| 131 | Yes         | 11      | 11-A | 100    | McF_4 | Inf | unif   | wholeT_0.01 | S1:CBN, S1:OT, S1:OT-A                                                                                                                                                               |
| 132 | Yes         | 11      | 11-A | 100    | McF_4 | Inf | unif   | wholeT_0.5  | S1:CBN, S1:OT, S1:OT-A                                                                                                                                                               |
| 133 | Yes         | 11      | 11-A | 100    | McF_6 | 0   | last   | singleC     | S1:OT, S1:OT-A                                                                                                                                                                       |
| 134 | Yes         | 11      | 11-A | 100    | McF_6 | 0   | last   | wholeT_0.01 | S1:OT, S1:OT-A, S5:OT-A                                                                                                                                                              |
| 135 | Yes         | 11      | 11-A | 100    | McF_6 | 0   | last   | wholeT_0.5  | S1:OT, S1:OT-A                                                                                                                                                                       |
| 136 | Yes         | 11      | 11-A | 100    | McF_6 | 0   | unif   | singleC     | S1:CBN, S1:CBN-A, S1:OT, S1:OT-A                                                                                                                                                     |
| 137 | Yes         | 11      | 11-A | 100    | McF_6 | 0   | unif   | wholeT_0.01 | S1:CBN, S1:CBN-A, S1:OT, S1:OT-A                                                                                                                                                     |

Table 15: (continued)

|     | Conjunction | Drivers | Tree | S.Size | Model | sh  | S.Time | S.Type      | Best method(s)                                                                                                                                                                                                       |
|-----|-------------|---------|------|--------|-------|-----|--------|-------------|----------------------------------------------------------------------------------------------------------------------------------------------------------------------------------------------------------------------|
| 138 | Yes         | 11      | 11-A | 100    | McF_6 | 0   | unif   | wholeT_0.5  | S1:CBN, S1:OT, S1:OT-A                                                                                                                                                                                               |
| 139 | Yes         | 11      | 11-A | 100    | McF_6 | Inf | last   | singleC     | S1:OT, S1:OT-A, S5:OT, S5:OT-A                                                                                                                                                                                       |
| 140 | Yes         | 11      | 11-A | 100    | McF_6 | Inf | last   | wholeT_0.01 | S1:OT, S1:OT-A, S5:OT, S5:OT-A                                                                                                                                                                                       |
| 141 | Yes         | 11      | 11-A | 100    | McF_6 | Inf | last   | wholeT_0.5  | S1:OT, S1:OT-A                                                                                                                                                                                                       |
| 142 | Yes         | 11      | 11-A | 100    | McF_6 | Inf | unif   | singleC     | S1:CBN, S1:OT, S1:OT-A                                                                                                                                                                                               |
| 143 | Yes         | 11      | 11-A | 100    | McF_6 | Inf | unif   | wholeT_0.01 | S1:CBN, S1:CBN-A, S1:OT, S1:OT-A                                                                                                                                                                                     |
| 144 | Yes         | 11      | 11-A | 100    | McF_6 | Inf | unif   | wholeT_0.5  | S1:CBN, S1:CBN-A, S1:OT, S1:OT-A                                                                                                                                                                                     |
| 145 | Yes         | 9       | 9-A  | 1000   | Bozic | 0   | last   | singleC     | S1:OT, S1:OT-A                                                                                                                                                                                                       |
| 146 | Yes         | 9       | 9-A  | 1000   | Bozic | 0   | last   | wholeT_0.01 | S1:DiP, S1:DiP-A, S1:OT, S1:OT-A,<br>S5:DiP, S5:DiP-A, S5:OT, S5:OT-A                                                                                                                                                |
| 147 | Yes         | 9       | 9-A  | 1000   | Bozic | 0   | last   | wholeT_0.5  | S1:OT, S1:OT-A                                                                                                                                                                                                       |
| 148 | Yes         | 9       | 9-A  | 1000   | Bozic | 0   | unif   | singleC     | none                                                                                                                                                                                                                 |
| 149 | Yes         | 9       | 9-A  | 1000   | Bozic | 0   | unif   | wholeT_0.01 | S1:CBN, S1:CBN-A                                                                                                                                                                                                     |
| 150 | Yes         | 9       | 9-A  | 1000   | Bozic | 0   | unif   | wholeT_0.5  | J1:CBN, J1:CBN-A, J1:DiP, J1:DiP-A,<br>J1:OT, J5:CBN, J5:CBN-A, J5:DiP,<br>J5:DiP-A, J5:OT, J5:OT-A, S1:CBN,<br>S1:CBN-A, S1:DiP, S1:DiP-A, S1:OT,<br>S1:OT-A, S5:CBN, S5:CBN-A, S5:DiP,<br>S5:DiP-A, S5:OT, S5:OT-A |
| 151 | Yes         | 9       | 9-A  | 1000   | Bozic | Inf | last   | singleC     | S1:CBN, S1:CBN-A, S1:OT, S1:OT-A,<br>S5:CBN-A                                                                                                                                                                        |
| 152 | Yes         | 9       | 9-A  | 1000   | Bozic | Inf | last   | wholeT_0.01 | J1:CBN-A, S1:CBN, S1:CBN-A, S1:DiP,<br>S1:DiP-A, S1:OT, S1:OT-A, S5:CBN,<br>S5:CBN-A, S5:DiP, S5:DiP-A, S5:OT-A                                                                                                      |
| 153 | Yes         | 9       | 9-A  | 1000   | Bozic | Inf | last   | wholeT_0.5  | S1:CBN, S1:CBN-A, S1:OT, S1:OT-A                                                                                                                                                                                     |
| 154 | Yes         | 9       | 9-A  | 1000   | Bozic | Inf | unif   | singleC     | S1:CBN, S1:CBN-A, S1:OT, S1:OT-A                                                                                                                                                                                     |
| 155 | Yes         | 9       | 9-A  | 1000   | Bozic | Inf | unif   | wholeT_0.01 | S1:CBN, S1:CBN-A, S1:DiP, S1:DiP-A,<br>S1:OT, S1:OT-A, S5:CBN, S5:CBN-A,<br>S5:DiP, S5:DiP-A, S5:OT, S5:OT-A                                                                                                         |
| 156 | Yes         | 9       | 9-A  | 1000   | Bozic | Inf | unif   | wholeT_0.5  | S1:CBN, S1:OT, S1:OT-A                                                                                                                                                                                               |
| 157 | Yes         | 9       | 9-A  | 1000   | exp   | 0   | last   | singleC     | J1:OT-A, J5:CBN, J5:DiP, J5:OT,<br>S1:CBN, S1:CBN-A, S1:DiP, S1:DiP-A,<br>S1:OT, S1:OT-A, S5:DiP-A, S5:OT                                                                                                            |
| 158 | Yes         | 9       | 9-A  | 1000   | exp   | 0   | last   | wholeT_0.01 | S1:CBN-A, S1:OT, S1:OT-A                                                                                                                                                                                             |
| 159 | Yes         | 9       | 9-A  | 1000   | exp   | 0   | last   | wholeT_0.5  | none                                                                                                                                                                                                                 |
| 160 | Yes         | 9       | 9-A  | 1000   | exp   | 0   | unif   | singleC     | none                                                                                                                                                                                                                 |
| 161 | Yes         | 9       | 9-A  | 1000   | exp   | 0   | unif   | wholeT_0.01 | J1:DiP, J5:CBN-A, S1:CBN, S1:CBN-A,<br>S1:DiP, S1:DiP-A, S1:OT, S1:OT-A                                                                                                                                              |
| 162 | Yes         | 9       | 9-A  | 1000   | exp   | 0   | unif   | wholeT_0.5  | none                                                                                                                                                                                                                 |
| 163 | Yes         | 9       | 9-A  | 1000   | exp   | Inf | last   | singleC     | S1:CBN, S1:CBN-A, S1:OT, S1:OT-A                                                                                                                                                                                     |

Table 15: (continued)

|     | Conjunction | Drivers | Tree | S.Size | Model | sh  | S.Time | S.Type      | Best method(s)                                                                                         |
|-----|-------------|---------|------|--------|-------|-----|--------|-------------|--------------------------------------------------------------------------------------------------------|
| 164 | Yes         | 9       | 9-A  | 1000   | exp   | Inf | last   | wholeT_0.01 | S1:CBN, S1:CBN-A, S1:DiP, S1:DiP-A, S1:OT, S1:OT-A, S5:CBN, S5:CBN-A, S5:DiP, S5:DiP-A, S5:OT, S5:OT-A |
| 165 | Yes         | 9       | 9-A  | 1000   | exp   | Inf | last   | wholeT_0.5  | S1:CBN, S1:CBN-A, S1:OT, S1:OT-A                                                                       |
| 166 | Yes         | 9       | 9-A  | 1000   | exp   | Inf | unif   | singleC     | S1:CBN, S1:CBN-A, S1:OT, S1:OT-A                                                                       |
| 167 | Yes         | 9       | 9-A  | 1000   | exp   | Inf | unif   | wholeT_0.01 | S1:CBN, S1:CBN-A, S1:OT, S1:OT-A                                                                       |
| 168 | Yes         | 9       | 9-A  | 1000   | exp   | Inf | unif   | wholeT_0.5  | S1:CBN, S1:OT, S1:OT-A                                                                                 |
| 169 | Yes         | 9       | 9-A  | 1000   | McF_4 | 0   | last   | singleC     | S1:DiP, S1:DiP-A, S1:OT, S1:OT-A                                                                       |
| 170 | Yes         | 9       | 9-A  | 1000   | McF_4 | 0   | last   | wholeT_0.01 | S1:CBN, S1:CBN-A, S1:DiP, S1:DiP-A, S1:OT, S1:OT-A                                                     |
| 171 | Yes         | 9       | 9-A  | 1000   | McF_4 | 0   | last   | wholeT_0.5  | S1:DiP, S1:DiP-A, S1:OT, S1:OT-A                                                                       |
| 172 | Yes         | 9       | 9-A  | 1000   | McF_4 | 0   | unif   | singleC     | S1:CBN, S1:CBN-A, S1:DiP, S1:DiP-A, S1:OT, S1:OT-A                                                     |
| 173 | Yes         | 9       | 9-A  | 1000   | McF_4 | 0   | unif   | wholeT_0.01 | S1:CBN, S1:CBN-A, S1:DiP, S1:DiP-A, S1:OT-A                                                            |
| 174 | Yes         | 9       | 9-A  | 1000   | McF_4 | 0   | unif   | wholeT_0.5  | S1:CBN, S1:CBN-A, S1:DiP, S1:DiP-A, S1:OT, S1:OT-A                                                     |
| 175 | Yes         | 9       | 9-A  | 1000   | McF_4 | Inf | last   | singleC     | S1:OT, S1:OT-A                                                                                         |
| 176 | Yes         | 9       | 9-A  | 1000   | McF_4 | Inf | last   | wholeT_0.01 | S1:OT-A                                                                                                |
| 177 | Yes         | 9       | 9-A  | 1000   | McF_4 | Inf | last   | wholeT_0.5  | S1:CBN, S1:DiP, S1:DiP-A, S1:OT, S1:OT-A                                                               |
| 178 | Yes         | 9       | 9-A  | 1000   | McF_4 | Inf | unif   | singleC     | S1:CBN, S1:CBN-A, S1:OT, S1:OT-A                                                                       |
| 179 | Yes         | 9       | 9-A  | 1000   | McF_4 | Inf | unif   | wholeT_0.01 | S1:CBN, S1:CBN-A, S1:OT, S1:OT-A                                                                       |
| 180 | Yes         | 9       | 9-A  | 1000   | McF_4 | Inf | unif   | wholeT_0.5  | S1:CBN, S1:CBN-A, S1:OT, S1:OT-A                                                                       |
| 181 | Yes         | 9       | 9-A  | 1000   | McF_6 | 0   | last   | singleC     | S1:DiP-A, S1:OT-A, S5:DiP-A                                                                            |
| 182 | Yes         | 9       | 9-A  | 1000   | McF_6 | 0   | last   | wholeT_0.01 | S1:DiP-A, S5:DiP-A                                                                                     |
| 183 | Yes         | 9       | 9-A  | 1000   | McF_6 | 0   | last   | wholeT_0.5  | S1:DiP-A, S1:OT-A, S5:DiP-A, S5:OT-A                                                                   |
| 184 | Yes         | 9       | 9-A  | 1000   | McF_6 | 0   | unif   | singleC     | S1:CBN, S1:CBN-A, S1:DiP, S1:DiP-A                                                                     |
| 185 | Yes         | 9       | 9-A  | 1000   | McF_6 | 0   | unif   | wholeT_0.01 | S1:CBN, S1:CBN-A, S1:DiP, S1:DiP-A                                                                     |
| 186 | Yes         | 9       | 9-A  | 1000   | McF_6 | 0   | unif   | wholeT_0.5  | S1:CBN, S1:CBN-A, S1:DiP, S1:DiP-A                                                                     |
| 187 | Yes         | 9       | 9-A  | 1000   | McF_6 | Inf | last   | singleC     | S1:DiP-A, S1:OT-A, S5:DiP-A, S5:OT-A                                                                   |
| 188 | Yes         | 9       | 9-A  | 1000   | McF_6 | Inf | last   | wholeT_0.01 | S1:OT-A, S5:OT-A                                                                                       |
| 189 | Yes         | 9       | 9-A  | 1000   | McF_6 | Inf | last   | wholeT_0.5  | S1:DiP-A, S1:OT-A, S5:DiP-A, S5:OT-A                                                                   |
| 190 | Yes         | 9       | 9-A  | 1000   | McF_6 | Inf | unif   | singleC     | S1:CBN, S1:CBN-A                                                                                       |
| 191 | Yes         | 9       | 9-A  | 1000   | McF_6 | Inf | unif   | wholeT_0.01 | S1:CBN, S1:CBN-A, S1:DiP, S1:DiP-A, S1:OT, S1:OT-A                                                     |
| 192 | Yes         | 9       | 9-A  | 1000   | McF_6 | Inf | unif   | wholeT_0.5  | S1:CBN, S1:CBN-A                                                                                       |
| 193 | Yes         | 9       | 9-A  | 200    | Bozic | 0   | last   | singleC     | S1:CBN, S1:OT, S1:OT-A                                                                                 |
| 194 | Yes         | 9       | 9-A  | 200    | Bozic | 0   | last   | wholeT_0.01 | S1:CBN, S1:CBN-A, S1:OT, S1:OT-A                                                                       |
| 195 | Yes         | 9       | 9-A  | 200    | Bozic | 0   | last   | wholeT_0.5  | S1:OT, S1:OT-A                                                                                         |

Table 15: (continued)

|     | Conjunction | Drivers | Tree | S.Size | Model | sh  | S.Time | S.Type      | Best method(s)                                                                                                                                                                                       |
|-----|-------------|---------|------|--------|-------|-----|--------|-------------|------------------------------------------------------------------------------------------------------------------------------------------------------------------------------------------------------|
| 196 | Yes         | 9       | 9-A  | 200    | Bozic | 0   | unif   | singleC     | S1:CBN, S1:CBN-A, S1:OT, S1:OT-A                                                                                                                                                                     |
| 197 | Yes         | 9       | 9-A  | 200    | Bozic | 0   | unif   | wholeT_0.01 | S1:CBN, S1:CBN-A, S1:OT-A                                                                                                                                                                            |
| 198 | Yes         | 9       | 9-A  | 200    | Bozic | 0   | unif   | wholeT_0.5  | J1:CBN, J1:CBN-A, J1:DiP, J1:DiP-A, J1:OT, J1:OT-A, J5:CBN, J5:CBN-A, J5:DiP, J5:DiP-A, J5:OT, J5:OT-A, S1:CBN, S1:CBN-A, S1:DiP, S1:DiP-A, S1:OT, S1:OT-A, S5:CBN, S5:DiP, S5:DiP-A, S5:OT, S5:OT-A |
| 199 | Yes         | 9       | 9-A  | 200    | Bozic | Inf | last   | singleC     | S1:CBN, S1:CBN-A                                                                                                                                                                                     |
| 200 | Yes         | 9       | 9-A  | 200    | Bozic | Inf | last   | wholeT_0.01 | S1:CBN, S1:CBN-A, S1:OT-A, S5:CBN, S5:CBN-A, S5:OT, S5:OT-A                                                                                                                                          |
| 201 | Yes         | 9       | 9-A  | 200    | Bozic | Inf | last   | wholeT_0.5  | S1:CBN, S1:CBN-A, S1:OT, S1:OT-A                                                                                                                                                                     |
| 202 | Yes         | 9       | 9-A  | 200    | Bozic | Inf | unif   | singleC     | S1:CBN, S1:CBN-A, S1:OT, S1:OT-A                                                                                                                                                                     |
| 203 | Yes         | 9       | 9-A  | 200    | Bozic | Inf | unif   | wholeT_0.01 | J1:CBN, J1:CBN-A, S1:CBN, S1:CBN-A, S1:OT, S1:OT-A, S5:CBN, S5:CBN-A, S5:OT, S5:OT-A                                                                                                                 |
| 204 | Yes         | 9       | 9-A  | 200    | Bozic | Inf | unif   | wholeT_0.5  | S1:CBN, S1:CBN-A, S1:OT, S1:OT-A                                                                                                                                                                     |
| 205 | Yes         | 9       | 9-A  | 200    | exp   | 0   | last   | singleC     | S1:CBN, S1:OT, S1:OT-A                                                                                                                                                                               |
| 206 | Yes         | 9       | 9-A  | 200    | exp   | 0   | last   | wholeT_0.01 | S1:CBN-A, S1:OT, S1:OT-A                                                                                                                                                                             |
| 207 | Yes         | 9       | 9-A  | 200    | exp   | 0   | last   | wholeT_0.5  | S1:CBN, S1:CBN-A, S1:OT, S1:OT-A                                                                                                                                                                     |
| 208 | Yes         | 9       | 9-A  | 200    | exp   | 0   | unif   | singleC     | none                                                                                                                                                                                                 |
| 209 | Yes         | 9       | 9-A  | 200    | exp   | 0   | unif   | wholeT_0.01 | S1:CBN, S1:CBN-A, S1:OT, S1:OT-A                                                                                                                                                                     |
| 210 | Yes         | 9       | 9-A  | 200    | exp   | 0   | unif   | wholeT_0.5  | J1:CBN-A, J1:DiP, J1:DiP-A, J1:OT-A, J5:DiP, J5:DiP-A, J5:OT, J5:OT-A, S1:CBN, S1:CBN-A, S1:DiP, S1:DiP-A, S1:OT, S1:OT-A, S5:CBN, S5:CBN-A, S5:DiP-A, S5:OT                                         |
| 211 | Yes         | 9       | 9-A  | 200    | exp   | Inf | last   | singleC     | S1:CBN, S1:CBN-A, S1:OT, S1:OT-A                                                                                                                                                                     |
| 212 | Yes         | 9       | 9-A  | 200    | exp   | Inf | last   | wholeT_0.01 | S1:CBN, S1:CBN-A, S1:OT-A, S5:CBN, S5:CBN-A                                                                                                                                                          |
| 213 | Yes         | 9       | 9-A  | 200    | exp   | Inf | last   | wholeT_0.5  | S1:CBN, S1:CBN-A, S1:OT, S1:OT-A                                                                                                                                                                     |
| 214 | Yes         | 9       | 9-A  | 200    | exp   | Inf | unif   | singleC     | S1:CBN, S1:CBN-A, S1:OT, S1:OT-A                                                                                                                                                                     |
| 215 | Yes         | 9       | 9-A  | 200    | exp   | Inf | unif   | wholeT_0.01 | S1:CBN, S1:CBN-A, S1:OT-A                                                                                                                                                                            |
| 216 | Yes         | 9       | 9-A  | 200    | exp   | Inf | unif   | wholeT_0.5  | S1:CBN, S1:CBN-A, S1:OT, S1:OT-A                                                                                                                                                                     |
| 217 | Yes         | 9       | 9-A  | 200    | McF_4 | 0   | last   | singleC     | S1:CBN, S1:CBN-A, S1:OT, S1:OT-A                                                                                                                                                                     |
| 218 | Yes         | 9       | 9-A  | 200    | McF_4 | 0   | last   | wholeT_0.01 | S1:CBN, S1:CBN-A, S1:OT, S1:OT-A                                                                                                                                                                     |
| 219 | Yes         | 9       | 9-A  | 200    | McF_4 | 0   | last   | wholeT_0.5  | S1:CBN, S1:CBN-A, S1:OT, S1:OT-A                                                                                                                                                                     |
| 220 | Yes         | 9       | 9-A  | 200    | McF_4 | 0   | unif   | singleC     | S1:CBN, S1:CBN-A, S1:OT, S1:OT-A                                                                                                                                                                     |
| 221 | Yes         | 9       | 9-A  | 200    | McF_4 | 0   | unif   | wholeT_0.01 | S1:CBN, S1:CBN-A                                                                                                                                                                                     |
| 222 | Yes         | 9       | 9-A  | 200    | McF_4 | 0   | unif   | wholeT_0.5  | S1:CBN, S1:CBN-A, S1:OT, S1:OT-A                                                                                                                                                                     |



Table 15: (continued)

|     | Conjunction | Drivers | Tree | S.Size | Model | sh  | S.Time | S.Type      | Best method(s)                                                                                                             |
|-----|-------------|---------|------|--------|-------|-----|--------|-------------|----------------------------------------------------------------------------------------------------------------------------|
| 223 | Yes         | 9       | 9-A  | 200    | McF_4 | Inf | last   | singleC     | S1:CBN-A, S1:OT, S1:OT-A                                                                                                   |
| 224 | Yes         | 9       | 9-A  | 200    | McF_4 | Inf | last   | wholeT_0.01 | S1:OT-A                                                                                                                    |
| 225 | Yes         | 9       | 9-A  | 200    | McF_4 | Inf | last   | wholeT_0.5  | S1:CBN-A, S1:OT, S1:OT-A                                                                                                   |
| 226 | Yes         | 9       | 9-A  | 200    | McF_4 | Inf | unif   | singleC     | S1:CBN, S1:CBN-A, S1:OT, S1:OT-A                                                                                           |
| 227 | Yes         | 9       | 9-A  | 200    | McF_4 | Inf | unif   | wholeT_0.01 | S1:CBN, S1:CBN-A, S1:OT, S1:OT-A                                                                                           |
| 228 | Yes         | 9       | 9-A  | 200    | McF_4 | Inf | unif   | wholeT_0.5  | S1:CBN, S1:CBN-A, S1:OT, S1:OT-A                                                                                           |
| 229 | Yes         | 9       | 9-A  | 200    | McF_6 | 0   | last   | singleC     | S1:OT-A                                                                                                                    |
| 230 | Yes         | 9       | 9-A  | 200    | McF_6 | 0   | last   | wholeT_0.01 | S1:OT-A, S5:OT-A                                                                                                           |
| 231 | Yes         | 9       | 9-A  | 200    | McF_6 | 0   | last   | wholeT_0.5  | S1:OT-A, S5:OT-A                                                                                                           |
| 232 | Yes         | 9       | 9-A  | 200    | McF_6 | 0   | unif   | singleC     | S1:CBN, S1:CBN-A, S1:OT, S1:OT-A                                                                                           |
| 233 | Yes         | 9       | 9-A  | 200    | McF_6 | 0   | unif   | wholeT_0.01 | S1:CBN, S1:CBN-A                                                                                                           |
| 234 | Yes         | 9       | 9-A  | 200    | McF_6 | 0   | unif   | wholeT_0.5  | S1:CBN, S1:CBN-A, S1:OT-A                                                                                                  |
| 235 | Yes         | 9       | 9-A  | 200    | McF_6 | Inf | last   | singleC     | S1:OT-A, S5:OT-A                                                                                                           |
| 236 | Yes         | 9       | 9-A  | 200    | McF_6 | Inf | last   | wholeT_0.01 | S1:OT-A, S5:OT-A                                                                                                           |
| 237 | Yes         | 9       | 9-A  | 200    | McF_6 | Inf | last   | wholeT_0.5  | S1:OT-A, S5:OT-A                                                                                                           |
| 238 | Yes         | 9       | 9-A  | 200    | McF_6 | Inf | unif   | singleC     | S1:CBN, S1:CBN-A                                                                                                           |
| 239 | Yes         | 9       | 9-A  | 200    | McF_6 | Inf | unif   | wholeT_0.01 | S1:CBN, S1:CBN-A, S1:OT, S1:OT-A                                                                                           |
| 240 | Yes         | 9       | 9-A  | 200    | McF_6 | Inf | unif   | wholeT_0.5  | S1:CBN, S1:CBN-A, S1:OT, S1:OT-A                                                                                           |
| 241 | Yes         | 9       | 9-A  | 100    | Bozic | 0   | last   | singleC     | S1:CBN, S1:CBN-A, S1:OT, S1:OT-A                                                                                           |
| 242 | Yes         | 9       | 9-A  | 100    | Bozic | 0   | last   | wholeT_0.01 | S1:CBN, S1:CBN-A, S1:OT, S1:OT-A                                                                                           |
| 243 | Yes         | 9       | 9-A  | 100    | Bozic | 0   | last   | wholeT_0.5  | S1:CBN, S1:CBN-A, S1:OT, S1:OT-A                                                                                           |
| 244 | Yes         | 9       | 9-A  | 100    | Bozic | 0   | unif   | singleC     | S1:CBN, S1:CBN-A, S1:OT, S1:OT-A                                                                                           |
| 245 | Yes         | 9       | 9-A  | 100    | Bozic | 0   | unif   | wholeT_0.01 | S1:CBN, S1:CBN-A                                                                                                           |
| 246 | Yes         | 9       | 9-A  | 100    | Bozic | 0   | unif   | wholeT_0.5  | J1:CBN-A, J1:DiP, J1:DiP-A, J1:OT,<br>J5:CBN, J5:CBN-A, J5:DiP-A, J5:OT-A,<br>S1:CBN, S1:CBN-A, S1:OT, S1:OT-A,<br>S5:OT-A |
| 247 | Yes         | 9       | 9-A  | 100    | Bozic | Inf | last   | singleC     | S1:CBN, S1:CBN-A, S1:OT, S1:OT-A                                                                                           |
| 248 | Yes         | 9       | 9-A  | 100    | Bozic | Inf | last   | wholeT_0.01 | J1:CBN, J1:CBN-A, S1:CBN, S1:CBN-A,<br>S1:OT, S1:OT-A, S5:CBN, S5:CBN-A,<br>S5:OT, S5:OT-A                                 |
| 249 | Yes         | 9       | 9-A  | 100    | Bozic | Inf | last   | wholeT_0.5  | S1:CBN, S1:CBN-A, S1:OT, S1:OT-A,<br>S5:CBN-A, S5:OT-A                                                                     |
| 250 | Yes         | 9       | 9-A  | 100    | Bozic | Inf | unif   | singleC     | S1:CBN, S1:CBN-A, S1:OT, S1:OT-A                                                                                           |
| 251 | Yes         | 9       | 9-A  | 100    | Bozic | Inf | unif   | wholeT_0.01 | S1:CBN, S1:CBN-A, S1:OT, S1:OT-A                                                                                           |
| 252 | Yes         | 9       | 9-A  | 100    | Bozic | Inf | unif   | wholeT_0.5  | S1:CBN, S1:CBN-A, S1:OT, S1:OT-A                                                                                           |
| 253 | Yes         | 9       | 9-A  | 100    | exp   | 0   | last   | singleC     | S1:CBN, S1:CBN-A, S1:OT, S1:OT-A                                                                                           |
| 254 | Yes         | 9       | 9-A  | 100    | exp   | 0   | last   | wholeT_0.01 | S1:CBN-A, S1:OT, S1:OT-A                                                                                                   |
| 255 | Yes         | 9       | 9-A  | 100    | exp   | 0   | last   | wholeT_0.5  | S1:OT, S1:OT-A                                                                                                             |

Table 15: (continued)

|     | Conjunction | Drivers | Tree | S.Size | Model | sh  | S.Time | S.Type      | Best method(s)                                                                                                                                                                                       |
|-----|-------------|---------|------|--------|-------|-----|--------|-------------|------------------------------------------------------------------------------------------------------------------------------------------------------------------------------------------------------|
| 256 | Yes         | 9       | 9-A  | 100    | exp   | 0   | unif   | singleC     | J1:CBN, J1:CBN-A, J1:DiP, J1:OT, J1:OT-A, S1:CBN, S1:CBN-A, S1:OT, S1:OT-A, S5:CBN, S5:DiP, S5:OT-A                                                                                                  |
| 257 | Yes         | 9       | 9-A  | 100    | exp   | 0   | unif   | wholeT_0.01 | S1:CBN, S1:CBN-A, S1:OT, S1:OT-A                                                                                                                                                                     |
| 258 | Yes         | 9       | 9-A  | 100    | exp   | 0   | unif   | wholeT_0.5  | J1:CBN, J1:CBN-A, J1:DiP, J1:DiP-A, J1:OT, J1:OT-A, J5:CBN, J5:CBN-A, J5:DiP, J5:OT, J5:OT-A, S1:CBN, S1:CBN-A, S1:DiP, S1:DiP-A, S1:OT, S1:OT-A, S5:CBN, S5:CBN-A, S5:DiP, S5:DiP-A, S5:OT, S5:OT-A |
| 259 | Yes         | 9       | 9-A  | 100    | exp   | Inf | last   | singleC     | S1:CBN, S1:CBN-A, S1:OT, S1:OT-A                                                                                                                                                                     |
| 260 | Yes         | 9       | 9-A  | 100    | exp   | Inf | last   | wholeT_0.01 | S1:CBN, S1:CBN-A, S1:OT, S1:OT-A, S5:CBN, S5:CBN-A, S5:OT, S5:OT-A                                                                                                                                   |
| 261 | Yes         | 9       | 9-A  | 100    | exp   | Inf | last   | wholeT_0.5  | S1:CBN, S1:CBN-A, S1:OT, S1:OT-A                                                                                                                                                                     |
| 262 | Yes         | 9       | 9-A  | 100    | exp   | Inf | unif   | singleC     | S1:CBN, S1:CBN-A, S1:OT, S1:OT-A                                                                                                                                                                     |
| 263 | Yes         | 9       | 9-A  | 100    | exp   | Inf | unif   | wholeT_0.01 | S1:CBN, S1:CBN-A                                                                                                                                                                                     |
| 264 | Yes         | 9       | 9-A  | 100    | exp   | Inf | unif   | wholeT_0.5  | S1:CBN, S1:CBN-A, S1:OT, S1:OT-A                                                                                                                                                                     |
| 265 | Yes         | 9       | 9-A  | 100    | McF_4 | 0   | last   | singleC     | S1:CBN, S1:CBN-A, S1:OT, S1:OT-A                                                                                                                                                                     |
| 266 | Yes         | 9       | 9-A  | 100    | McF_4 | 0   | last   | wholeT_0.01 | S1:CBN, S1:CBN-A, S1:OT, S1:OT-A                                                                                                                                                                     |
| 267 | Yes         | 9       | 9-A  | 100    | McF_4 | 0   | last   | wholeT_0.5  | S1:CBN, S1:CBN-A, S1:OT, S1:OT-A                                                                                                                                                                     |
| 268 | Yes         | 9       | 9-A  | 100    | McF_4 | 0   | unif   | singleC     | S1:CBN, S1:CBN-A, S1:OT, S1:OT-A                                                                                                                                                                     |
| 269 | Yes         | 9       | 9-A  | 100    | McF_4 | 0   | unif   | wholeT_0.01 | S1:CBN, S1:CBN-A                                                                                                                                                                                     |
| 270 | Yes         | 9       | 9-A  | 100    | McF_4 | 0   | unif   | wholeT_0.5  | S1:CBN, S1:CBN-A, S1:OT, S1:OT-A                                                                                                                                                                     |
| 271 | Yes         | 9       | 9-A  | 100    | McF_4 | Inf | last   | singleC     | S1:CBN, S1:CBN-A, S1:OT, S1:OT-A                                                                                                                                                                     |
| 272 | Yes         | 9       | 9-A  | 100    | McF_4 | Inf | last   | wholeT_0.01 | S1:OT-A, S5:OT-A                                                                                                                                                                                     |
| 273 | Yes         | 9       | 9-A  | 100    | McF_4 | Inf | last   | wholeT_0.5  | S1:CBN, S1:CBN-A, S1:OT, S1:OT-A                                                                                                                                                                     |
| 274 | Yes         | 9       | 9-A  | 100    | McF_4 | Inf | unif   | singleC     | S1:CBN, S1:CBN-A, S1:OT, S1:OT-A                                                                                                                                                                     |
| 275 | Yes         | 9       | 9-A  | 100    | McF_4 | Inf | unif   | wholeT_0.01 | S1:CBN, S1:CBN-A, S1:OT, S1:OT-A                                                                                                                                                                     |
| 276 | Yes         | 9       | 9-A  | 100    | McF_4 | Inf | unif   | wholeT_0.5  | S1:CBN, S1:CBN-A, S1:OT, S1:OT-A                                                                                                                                                                     |
| 277 | Yes         | 9       | 9-A  | 100    | McF_6 | 0   | last   | singleC     | S1:OT-A                                                                                                                                                                                              |
| 278 | Yes         | 9       | 9-A  | 100    | McF_6 | 0   | last   | wholeT_0.01 | S1:OT-A, S5:OT-A                                                                                                                                                                                     |
| 279 | Yes         | 9       | 9-A  | 100    | McF_6 | 0   | last   | wholeT_0.5  | S1:OT-A, S5:OT-A                                                                                                                                                                                     |
| 280 | Yes         | 9       | 9-A  | 100    | McF_6 | 0   | unif   | singleC     | S1:CBN, S1:CBN-A                                                                                                                                                                                     |
| 281 | Yes         | 9       | 9-A  | 100    | McF_6 | 0   | unif   | wholeT_0.01 | S1:CBN, S1:CBN-A                                                                                                                                                                                     |
| 282 | Yes         | 9       | 9-A  | 100    | McF_6 | 0   | unif   | wholeT_0.5  | S1:CBN, S1:CBN-A, S1:OT-A                                                                                                                                                                            |
| 283 | Yes         | 9       | 9-A  | 100    | McF_6 | Inf | last   | singleC     | S1:OT-A                                                                                                                                                                                              |
| 284 | Yes         | 9       | 9-A  | 100    | McF_6 | Inf | last   | wholeT_0.01 | S1:OT-A, S5:OT-A                                                                                                                                                                                     |
| 285 | Yes         | 9       | 9-A  | 100    | McF_6 | Inf | last   | wholeT_0.5  | S1:OT-A, S5:OT-A                                                                                                                                                                                     |
| 286 | Yes         | 9       | 9-A  | 100    | McF_6 | Inf | unif   | singleC     | S1:CBN, S1:CBN-A                                                                                                                                                                                     |
| 287 | Yes         | 9       | 9-A  | 100    | McF_6 | Inf | unif   | wholeT_0.01 | S1:CBN, S1:CBN-A                                                                                                                                                                                     |

Table 15: (continued)

|     | Conjunction | Drivers | Tree | S.Size | Model | sh  | S.Time | S.Type      | Best method(s)                                                                                                                                                                                        |
|-----|-------------|---------|------|--------|-------|-----|--------|-------------|-------------------------------------------------------------------------------------------------------------------------------------------------------------------------------------------------------|
| 288 | Yes         | 9       | 9-A  | 100    | McF_6 | Inf | unif   | wholeT_0.5  | S1:CBN, S1:CBN-A                                                                                                                                                                                      |
| 289 | Yes         | 7       | 7-A  | 1000   | Bozic | 0   | last   | singleC     | S1:OT-A, S5:OT-A                                                                                                                                                                                      |
| 290 | Yes         | 7       | 7-A  | 1000   | Bozic | 0   | last   | wholeT_0.01 | J1:DiP-A, J1:OT-A, J5:DiP-A, J5:OT-A, S1:DiP-A, S1:OT-A, S5:DiP-A, S5:OT-A                                                                                                                            |
| 291 | Yes         | 7       | 7-A  | 1000   | Bozic | 0   | last   | wholeT_0.5  | S1:OT-A                                                                                                                                                                                               |
| 292 | Yes         | 7       | 7-A  | 1000   | Bozic | 0   | unif   | singleC     | S1:CBN-A, S1:OT, S1:OT-A                                                                                                                                                                              |
| 293 | Yes         | 7       | 7-A  | 1000   | Bozic | 0   | unif   | wholeT_0.01 | S1:CBN, S1:CBN-A, S1:DiP, S1:DiP-A, S1:OT, S1:OT-A                                                                                                                                                    |
| 294 | Yes         | 7       | 7-A  | 1000   | Bozic | 0   | unif   | wholeT_0.5  | J1:CBN, J1:CBN-A, J1:OT, J1:OT-A, S1:CBN, S1:CBN-A, S1:DiP-A, S1:OT, S1:OT-A, S5:OT-A                                                                                                                 |
| 295 | Yes         | 7       | 7-A  | 1000   | Bozic | Inf | last   | singleC     | J1:DiP-A, J1:OT-A, J5:DiP-A, J5:OT-A, S1:DiP-A, S1:OT-A, S5:DiP-A, S5:OT-A                                                                                                                            |
| 296 | Yes         | 7       | 7-A  | 1000   | Bozic | Inf | last   | wholeT_0.01 | J1:DiP-A, J1:OT-A, J5:DiP-A, J5:OT-A, S1:DiP-A, S1:OT-A, S5:DiP-A, S5:OT-A                                                                                                                            |
| 297 | Yes         | 7       | 7-A  | 1000   | Bozic | Inf | last   | wholeT_0.5  | J1:DiP-A, J1:OT-A, J5:DiP-A, J5:OT-A, S1:DiP-A, S1:OT-A, S5:DiP-A, S5:OT-A                                                                                                                            |
| 298 | Yes         | 7       | 7-A  | 1000   | Bozic | Inf | unif   | singleC     | S1:DiP-A, S1:OT, S1:OT-A                                                                                                                                                                              |
| 299 | Yes         | 7       | 7-A  | 1000   | Bozic | Inf | unif   | wholeT_0.01 | J1:CBN, J1:CBN-A, J1:DiP-A, J1:OT, J1:OT-A, J5:CBN, J5:CBN-A, J5:DiP-A, J5:OT-A, S1:CBN, S1:CBN-A, S1:DiP-A, S1:OT, S1:OT-A, S5:CBN, S5:CBN-A, S5:DiP-A, S5:OT, S5:OT-A                               |
| 300 | Yes         | 7       | 7-A  | 1000   | Bozic | Inf | unif   | wholeT_0.5  | S1:CBN, S1:CBN-A, S1:OT, S1:OT-A                                                                                                                                                                      |
| 301 | Yes         | 7       | 7-A  | 1000   | exp   | 0   | last   | singleC     | S1:OT-A                                                                                                                                                                                               |
| 302 | Yes         | 7       | 7-A  | 1000   | exp   | 0   | last   | wholeT_0.01 | J1:OT-A, S1:OT-A, S5:OT-A                                                                                                                                                                             |
| 303 | Yes         | 7       | 7-A  | 1000   | exp   | 0   | last   | wholeT_0.5  | S1:OT-A                                                                                                                                                                                               |
| 304 | Yes         | 7       | 7-A  | 1000   | exp   | 0   | unif   | singleC     | J1:CBN, J1:CBN-A, J1:DiP, J1:DiP-A, J1:OT, J1:OT-A, J5:CBN, J5:CBN-A, J5:DiP, J5:DiP-A, J5:OT, S1:CBN, S1:CBN-A, S1:DiP, S1:DiP-A, S1:OT, S1:OT-A, S5:CBN, S5:CBN-A, S5:DiP, S5:DiP-A, S5:OT, S5:OT-A |
| 305 | Yes         | 7       | 7-A  | 1000   | exp   | 0   | unif   | wholeT_0.01 | S1:OT-A                                                                                                                                                                                               |
| 306 | Yes         | 7       | 7-A  | 1000   | exp   | 0   | unif   | wholeT_0.5  | none                                                                                                                                                                                                  |
| 307 | Yes         | 7       | 7-A  | 1000   | exp   | Inf | last   | singleC     | J1:OT-A, S1:OT-A, S5:OT-A                                                                                                                                                                             |
| 308 | Yes         | 7       | 7-A  | 1000   | exp   | Inf | last   | wholeT_0.01 | J1:DiP-A, J1:OT-A, J5:OT-A, S1:OT-A, S5:DiP-A, S5:OT-A                                                                                                                                                |
| 309 | Yes         | 7       | 7-A  | 1000   | exp   | Inf | last   | wholeT_0.5  | S1:OT-A, S5:OT-A                                                                                                                                                                                      |
| 310 | Yes         | 7       | 7-A  | 1000   | exp   | Inf | unif   | singleC     | S1:CBN, S1:CBN-A, S1:OT, S1:OT-A                                                                                                                                                                      |

Table 15: (continued)

|     | Conjunction | Drivers | Tree | S.Size | Model | sh  | S.Time | S.Type      | Best method(s)                                                                                                                         |
|-----|-------------|---------|------|--------|-------|-----|--------|-------------|----------------------------------------------------------------------------------------------------------------------------------------|
| 311 | Yes         | 7       | 7-A  | 1000   | exp   | Inf | unif   | wholeT_0.01 | J1:CBN, J1:CBN-A, J1:OT, J1:OT-A, J5:CBN, J5:CBN-A, J5:OT, J5:OT-A, S1:CBN, S1:CBN-A, S1:OT, S1:OT-A, S5:CBN, S5:CBN-A, S5:OT, S5:OT-A |
| 312 | Yes         | 7       | 7-A  | 1000   | exp   | Inf | unif   | wholeT_0.5  | S1:CBN-A, S1:OT, S1:OT-A                                                                                                               |
| 313 | Yes         | 7       | 7-A  | 1000   | McF_4 | 0   | last   | singleC     | J1:DiP-A, J1:OT-A, J5:DiP-A, J5:OT-A, S1:DiP-A, S1:OT-A, S5:DiP-A, S5:OT-A                                                             |
| 314 | Yes         | 7       | 7-A  | 1000   | McF_4 | 0   | last   | wholeT_0.01 | S1:OT-A                                                                                                                                |
| 315 | Yes         | 7       | 7-A  | 1000   | McF_4 | 0   | last   | wholeT_0.5  | J1:DiP-A, J1:OT-A, J5:DiP-A, J5:OT-A, S1:DiP-A, S1:OT-A, S5:DiP-A, S5:OT-A                                                             |
| 316 | Yes         | 7       | 7-A  | 1000   | McF_4 | 0   | unif   | singleC     | J1:DiP-A, J1:OT, J1:OT-A, S1:DiP-A, S1:OT, S1:OT-A, S5:DiP-A, S5:OT, S5:OT-A                                                           |
| 317 | Yes         | 7       | 7-A  | 1000   | McF_4 | 0   | unif   | wholeT_0.01 | J1:OT, S1:CBN, S1:CBN-A, S1:DiP, S1:DiP-A, S1:OT, S1:OT-A, S5:OT, S5:OT-A                                                              |
| 318 | Yes         | 7       | 7-A  | 1000   | McF_4 | 0   | unif   | wholeT_0.5  | J1:DiP-A, J1:OT, J1:OT-A, S1:DiP-A, S1:OT, S1:OT-A, S5:DiP-A, S5:OT, S5:OT-A                                                           |
| 319 | Yes         | 7       | 7-A  | 1000   | McF_4 | Inf | last   | singleC     | J1:DiP-A, J1:OT-A, J5:DiP-A, J5:OT-A, S1:DiP-A, S1:OT-A, S5:DiP-A, S5:OT-A                                                             |
| 320 | Yes         | 7       | 7-A  | 1000   | McF_4 | Inf | last   | wholeT_0.01 | S1:OT-A                                                                                                                                |
| 321 | Yes         | 7       | 7-A  | 1000   | McF_4 | Inf | last   | wholeT_0.5  | J1:DiP-A, J1:OT-A, J5:DiP-A, J5:OT-A, S1:DiP-A, S1:OT-A, S5:DiP-A, S5:OT-A                                                             |
| 322 | Yes         | 7       | 7-A  | 1000   | McF_4 | Inf | unif   | singleC     | J1:DiP-A, J1:OT, J1:OT-A, S1:OT, S1:OT-A, S5:OT, S5:OT-A                                                                               |
| 323 | Yes         | 7       | 7-A  | 1000   | McF_4 | Inf | unif   | wholeT_0.01 | J1:DiP-A, J1:OT, J1:OT-A, J5:OT-A, S1:DiP-A, S1:OT, S1:OT-A, S5:OT, S5:OT-A                                                            |
| 324 | Yes         | 7       | 7-A  | 1000   | McF_4 | Inf | unif   | wholeT_0.5  | J1:DiP-A, J1:OT, J1:OT-A, S1:DiP-A, S1:OT, S1:OT-A, S5:OT, S5:OT-A                                                                     |
| 325 | Yes         | 7       | 7-A  | 1000   | McF_6 | 0   | last   | singleC     | S1:DiP-A, S5:DiP-A                                                                                                                     |
| 326 | Yes         | 7       | 7-A  | 1000   | McF_6 | 0   | last   | wholeT_0.01 | J1:DiP-A, J1:OT-A, S1:OT-A, S5:DiP-A, S5:OT-A                                                                                          |
| 327 | Yes         | 7       | 7-A  | 1000   | McF_6 | 0   | last   | wholeT_0.5  | S1:DiP-A, S5:DiP-A                                                                                                                     |
| 328 | Yes         | 7       | 7-A  | 1000   | McF_6 | 0   | unif   | singleC     | S1:CBN-A                                                                                                                               |
| 329 | Yes         | 7       | 7-A  | 1000   | McF_6 | 0   | unif   | wholeT_0.01 | S1:CBN-A, S1:DiP, S1:DiP-A                                                                                                             |
| 330 | Yes         | 7       | 7-A  | 1000   | McF_6 | 0   | unif   | wholeT_0.5  | S1:CBN-A                                                                                                                               |
| 331 | Yes         | 7       | 7-A  | 1000   | McF_6 | Inf | last   | singleC     | S1:CBN-A, S1:DiP-A, S1:OT-A, S5:CBN-A, S5:DiP-A, S5:OT-A                                                                               |

Table 15: (continued)

|     | Conjunction | Drivers | Tree | S.Size | Model | sh  | S.Time | S.Type      | Best method(s)                                                                                                                                                                                                        |
|-----|-------------|---------|------|--------|-------|-----|--------|-------------|-----------------------------------------------------------------------------------------------------------------------------------------------------------------------------------------------------------------------|
| 332 | Yes         | 7       | 7-A  | 1000   | McF_6 | Inf | last   | wholeT_0.01 | S1:DiP-A, S5:DiP-A                                                                                                                                                                                                    |
| 333 | Yes         | 7       | 7-A  | 1000   | McF_6 | Inf | last   | wholeT_0.5  | S1:CBN-A, S1:DiP-A, S5:CBN-A,<br>S5:DiP-A                                                                                                                                                                             |
| 334 | Yes         | 7       | 7-A  | 1000   | McF_6 | Inf | unif   | singleC     | S1:CBN-A                                                                                                                                                                                                              |
| 335 | Yes         | 7       | 7-A  | 1000   | McF_6 | Inf | unif   | wholeT_0.01 | S1:CBN-A                                                                                                                                                                                                              |
| 336 | Yes         | 7       | 7-A  | 1000   | McF_6 | Inf | unif   | wholeT_0.5  | S1:CBN-A                                                                                                                                                                                                              |
| 337 | Yes         | 7       | 7-A  | 200    | Bozic | 0   | last   | singleC     | S1:OT-A, S5:OT-A                                                                                                                                                                                                      |
| 338 | Yes         | 7       | 7-A  | 200    | Bozic | 0   | last   | wholeT_0.01 | J1:OT-A, J5:OT-A, S1:OT-A, S5:OT-A                                                                                                                                                                                    |
| 339 | Yes         | 7       | 7-A  | 200    | Bozic | 0   | last   | wholeT_0.5  | S1:OT-A                                                                                                                                                                                                               |
| 340 | Yes         | 7       | 7-A  | 200    | Bozic | 0   | unif   | singleC     | S1:CBN, S1:CBN-A, S1:OT, S1:OT-A                                                                                                                                                                                      |
| 341 | Yes         | 7       | 7-A  | 200    | Bozic | 0   | unif   | wholeT_0.01 | J1:OT-A, S1:CBN, S1:CBN-A, S1:OT,<br>S1:OT-A, S5:OT, S5:OT-A                                                                                                                                                          |
| 342 | Yes         | 7       | 7-A  | 200    | Bozic | 0   | unif   | wholeT_0.5  | S1:CBN, S1:CBN-A, S1:OT, S1:OT-A                                                                                                                                                                                      |
| 343 | Yes         | 7       | 7-A  | 200    | Bozic | Inf | last   | singleC     | J1:OT-A, J5:OT-A, S1:OT-A, S5:OT-A                                                                                                                                                                                    |
| 344 | Yes         | 7       | 7-A  | 200    | Bozic | Inf | last   | wholeT_0.01 | J1:OT-A, J5:OT-A, S1:OT-A, S5:OT-A                                                                                                                                                                                    |
| 345 | Yes         | 7       | 7-A  | 200    | Bozic | Inf | last   | wholeT_0.5  | J1:OT-A, J5:OT-A, S1:OT-A, S5:OT-A                                                                                                                                                                                    |
| 346 | Yes         | 7       | 7-A  | 200    | Bozic | Inf | unif   | singleC     | S1:CBN, S1:OT, S1:OT-A                                                                                                                                                                                                |
| 347 | Yes         | 7       | 7-A  | 200    | Bozic | Inf | unif   | wholeT_0.01 | J1:CBN, J1:CBN-A, J1:OT, J1:OT-A,<br>J5:CBN, J5:CBN-A, J5:OT, J5:OT-A,<br>S1:CBN, S1:CBN-A, S1:OT, S1:OT-A,<br>S5:CBN, S5:CBN-A, S5:OT, S5:OT-A                                                                       |
| 348 | Yes         | 7       | 7-A  | 200    | Bozic | Inf | unif   | wholeT_0.5  | S1:CBN, S1:CBN-A, S1:OT, S1:OT-A                                                                                                                                                                                      |
| 349 | Yes         | 7       | 7-A  | 200    | exp   | 0   | last   | singleC     | S1:OT-A                                                                                                                                                                                                               |
| 350 | Yes         | 7       | 7-A  | 200    | exp   | 0   | last   | wholeT_0.01 | J1:OT-A, S1:OT-A, S5:OT-A                                                                                                                                                                                             |
| 351 | Yes         | 7       | 7-A  | 200    | exp   | 0   | last   | wholeT_0.5  | S1:OT-A                                                                                                                                                                                                               |
| 352 | Yes         | 7       | 7-A  | 200    | exp   | 0   | unif   | singleC     | J1:CBN, J1:CBN-A, J1:DiP-A, J1:OT,<br>J1:OT-A, J5:DiP, J5:OT, J5:OT-A,<br>S1:CBN, S1:CBN-A, S1:DiP, S1:DiP-A,<br>S1:OT, S1:OT-A                                                                                       |
| 353 | Yes         | 7       | 7-A  | 200    | exp   | 0   | unif   | wholeT_0.01 | S1:CBN, S1:CBN-A, S1:OT, S1:OT-A                                                                                                                                                                                      |
| 354 | Yes         | 7       | 7-A  | 200    | exp   | 0   | unif   | wholeT_0.5  | J1:CBN, J1:CBN-A, J1:DiP, J1:DiP-A,<br>J1:OT, J1:OT-A, J5:CBN, J5:CBN-A,<br>J5:DiP-A, J5:OT, J5:OT-A, S1:CBN,<br>S1:CBN-A, S1:DiP, S1:DiP-A, S1:OT,<br>S1:OT-A, S5:CBN, S5:CBN-A, S5:DiP,<br>S5:DiP-A, S5:OT, S5:OT-A |
| 355 | Yes         | 7       | 7-A  | 200    | exp   | Inf | last   | singleC     | J1:OT-A, S1:OT-A, S5:OT-A                                                                                                                                                                                             |
| 356 | Yes         | 7       | 7-A  | 200    | exp   | Inf | last   | wholeT_0.01 | J1:OT-A, J5:OT-A, S1:OT-A, S5:OT-A                                                                                                                                                                                    |
| 357 | Yes         | 7       | 7-A  | 200    | exp   | Inf | last   | wholeT_0.5  | S1:OT-A, S5:OT-A                                                                                                                                                                                                      |
| 358 | Yes         | 7       | 7-A  | 200    | exp   | Inf | unif   | singleC     | S1:CBN, S1:CBN-A, S1:OT, S1:OT-A                                                                                                                                                                                      |

Table 15: (continued)

|     | Conjunction | Drivers | Tree | S.Size | Model | sh  | S.Time | S.Type      | Best method(s)                                                                                                                |
|-----|-------------|---------|------|--------|-------|-----|--------|-------------|-------------------------------------------------------------------------------------------------------------------------------|
| 359 | Yes         | 7       | 7-A  | 200    | exp   | Inf | unif   | wholeT_0.01 | J1:CBN, J1:CBN-A, J1:OT, J1:OT-A, J5:CBN, J5:CBN-A, J5:OT, S1:CBN, S1:CBN-A, S1:OT, S1:OT-A, S5:CBN, S5:CBN-A, S5:OT, S5:OT-A |
| 360 | Yes         | 7       | 7-A  | 200    | exp   | Inf | unif   | wholeT_0.5  | S1:CBN-A, S1:OT, S1:OT-A                                                                                                      |
| 361 | Yes         | 7       | 7-A  | 200    | McF_4 | 0   | last   | singleC     | J1:OT-A, J5:OT-A, S1:OT-A, S5:OT-A                                                                                            |
| 362 | Yes         | 7       | 7-A  | 200    | McF_4 | 0   | last   | wholeT_0.01 | S1:OT-A                                                                                                                       |
| 363 | Yes         | 7       | 7-A  | 200    | McF_4 | 0   | last   | wholeT_0.5  | J1:OT-A, J5:OT-A, S1:OT-A, S5:OT-A                                                                                            |
| 364 | Yes         | 7       | 7-A  | 200    | McF_4 | 0   | unif   | singleC     | J1:OT-A, S1:CBN-A, S1:OT, S1:OT-A, S5:OT, S5:OT-A                                                                             |
| 365 | Yes         | 7       | 7-A  | 200    | McF_4 | 0   | unif   | wholeT_0.01 | J1:OT, J1:OT-A, S1:OT, S1:OT-A                                                                                                |
| 366 | Yes         | 7       | 7-A  | 200    | McF_4 | 0   | unif   | wholeT_0.5  | J1:OT, J1:OT-A, S1:OT, S1:OT-A, S5:OT, S5:OT-A                                                                                |
| 367 | Yes         | 7       | 7-A  | 200    | McF_4 | Inf | last   | singleC     | J1:OT-A, J5:OT-A, S1:OT-A, S5:OT-A                                                                                            |
| 368 | Yes         | 7       | 7-A  | 200    | McF_4 | Inf | last   | wholeT_0.01 | S1:OT-A                                                                                                                       |
| 369 | Yes         | 7       | 7-A  | 200    | McF_4 | Inf | last   | wholeT_0.5  | J1:OT-A, J5:OT-A, S1:OT-A, S5:OT-A                                                                                            |
| 370 | Yes         | 7       | 7-A  | 200    | McF_4 | Inf | unif   | singleC     | J1:OT, J1:OT-A, S1:OT, S1:OT-A, S5:OT, S5:OT-A                                                                                |
| 371 | Yes         | 7       | 7-A  | 200    | McF_4 | Inf | unif   | wholeT_0.01 | J1:OT, J1:OT-A, S1:OT, S1:OT-A, S5:OT, S5:OT-A                                                                                |
| 372 | Yes         | 7       | 7-A  | 200    | McF_4 | Inf | unif   | wholeT_0.5  | J1:OT, J1:OT-A, S1:OT, S1:OT-A, S5:OT, S5:OT-A                                                                                |
| 373 | Yes         | 7       | 7-A  | 200    | McF_6 | 0   | last   | singleC     | J1:CBN-A, S1:CBN, S1:OT-A, S5:CBN, S5:CBN-A, S5:OT-A                                                                          |
| 374 | Yes         | 7       | 7-A  | 200    | McF_6 | 0   | last   | wholeT_0.01 | J1:OT-A, J5:CBN-A, S1:OT-A, S5:OT-A                                                                                           |
| 375 | Yes         | 7       | 7-A  | 200    | McF_6 | 0   | last   | wholeT_0.5  | S1:CBN, S1:CBN-A, S1:OT-A, S5:CBN-A, S5:OT-A                                                                                  |
| 376 | Yes         | 7       | 7-A  | 200    | McF_6 | 0   | unif   | singleC     | S1:CBN-A                                                                                                                      |
| 377 | Yes         | 7       | 7-A  | 200    | McF_6 | 0   | unif   | wholeT_0.01 | S1:CBN, S1:CBN-A, S1:OT, S1:OT-A                                                                                              |
| 378 | Yes         | 7       | 7-A  | 200    | McF_6 | 0   | unif   | wholeT_0.5  | S1:CBN, S1:CBN-A, S1:OT, S1:OT-A                                                                                              |
| 379 | Yes         | 7       | 7-A  | 200    | McF_6 | Inf | last   | singleC     | J1:CBN-A, S1:CBN, S1:CBN-A, S1:OT-A, S5:CBN-A, S5:OT-A                                                                        |
| 380 | Yes         | 7       | 7-A  | 200    | McF_6 | Inf | last   | wholeT_0.01 | J5:CBN-A, S1:OT-A, S5:OT-A                                                                                                    |
| 381 | Yes         | 7       | 7-A  | 200    | McF_6 | Inf | last   | wholeT_0.5  | S1:CBN, S1:CBN-A, S1:OT-A, S5:CBN-A, S5:OT-A                                                                                  |
| 382 | Yes         | 7       | 7-A  | 200    | McF_6 | Inf | unif   | singleC     | S1:CBN-A                                                                                                                      |
| 383 | Yes         | 7       | 7-A  | 200    | McF_6 | Inf | unif   | wholeT_0.01 | S1:CBN-A                                                                                                                      |
| 384 | Yes         | 7       | 7-A  | 200    | McF_6 | Inf | unif   | wholeT_0.5  | S1:CBN, S1:CBN-A, S1:OT, S1:OT-A                                                                                              |
| 385 | Yes         | 7       | 7-A  | 100    | Bozic | 0   | last   | singleC     | S1:OT-A                                                                                                                       |
| 386 | Yes         | 7       | 7-A  | 100    | Bozic | 0   | last   | wholeT_0.01 | J1:OT-A, J5:OT-A, S1:OT-A, S5:OT-A                                                                                            |

Table 15: (continued)

|     | Conjunction | Drivers | Tree | S.Size | Model | sh  | S.Time | S.Type      | Best method(s)                                                                                                                                  |
|-----|-------------|---------|------|--------|-------|-----|--------|-------------|-------------------------------------------------------------------------------------------------------------------------------------------------|
| 387 | Yes         | 7       | 7-A  | 100    | Bozic | 0   | last   | wholeT_0.5  | S1:OT-A                                                                                                                                         |
| 388 | Yes         | 7       | 7-A  | 100    | Bozic | 0   | unif   | singleC     | S1:CBN, S1:CBN-A, S1:OT, S1:OT-A                                                                                                                |
| 389 | Yes         | 7       | 7-A  | 100    | Bozic | 0   | unif   | wholeT_0.01 | S1:CBN, S1:CBN-A                                                                                                                                |
| 390 | Yes         | 7       | 7-A  | 100    | Bozic | 0   | unif   | wholeT_0.5  | S1:CBN, S1:CBN-A, S1:OT, S1:OT-A                                                                                                                |
| 391 | Yes         | 7       | 7-A  | 100    | Bozic | Inf | last   | singleC     | J1:OT-A, S1:OT-A, S5:OT-A                                                                                                                       |
| 392 | Yes         | 7       | 7-A  | 100    | Bozic | Inf | last   | wholeT_0.01 | J1:OT-A, J5:OT-A, S1:OT-A, S5:OT-A                                                                                                              |
| 393 | Yes         | 7       | 7-A  | 100    | Bozic | Inf | last   | wholeT_0.5  | J1:OT-A, J5:OT-A, S1:OT-A, S5:OT-A                                                                                                              |
| 394 | Yes         | 7       | 7-A  | 100    | Bozic | Inf | unif   | singleC     | S1:CBN, S1:CBN-A, S1:OT, S1:OT-A                                                                                                                |
| 395 | Yes         | 7       | 7-A  | 100    | Bozic | Inf | unif   | wholeT_0.01 | J1:CBN, J1:CBN-A, J1:OT, J1:OT-A,<br>J5:CBN, J5:CBN-A, J5:OT, J5:OT-A,<br>S1:CBN, S1:CBN-A, S1:OT, S1:OT-A,<br>S5:CBN, S5:CBN-A, S5:OT, S5:OT-A |
| 396 | Yes         | 7       | 7-A  | 100    | Bozic | Inf | unif   | wholeT_0.5  | S1:CBN, S1:CBN-A, S1:OT, S1:OT-A                                                                                                                |
| 397 | Yes         | 7       | 7-A  | 100    | exp   | 0   | last   | singleC     | S1:OT-A                                                                                                                                         |
| 398 | Yes         | 7       | 7-A  | 100    | exp   | 0   | last   | wholeT_0.01 | S1:OT-A, S5:OT-A                                                                                                                                |
| 399 | Yes         | 7       | 7-A  | 100    | exp   | 0   | last   | wholeT_0.5  | S1:OT-A                                                                                                                                         |
| 400 | Yes         | 7       | 7-A  | 100    | exp   | 0   | unif   | singleC     | S1:CBN, S1:CBN-A, S1:OT, S1:OT-A                                                                                                                |
| 401 | Yes         | 7       | 7-A  | 100    | exp   | 0   | unif   | wholeT_0.01 | S1:CBN, S1:CBN-A, S1:OT, S1:OT-A                                                                                                                |
| 402 | Yes         | 7       | 7-A  | 100    | exp   | 0   | unif   | wholeT_0.5  | J1:OT, J1:OT-A, S1:CBN, S1:CBN-A,<br>S1:OT, S1:OT-A                                                                                             |
| 403 | Yes         | 7       | 7-A  | 100    | exp   | Inf | last   | singleC     | S1:OT-A, S5:OT-A                                                                                                                                |
| 404 | Yes         | 7       | 7-A  | 100    | exp   | Inf | last   | wholeT_0.01 | J1:OT-A, J5:OT-A, S1:OT-A, S5:OT-A                                                                                                              |
| 405 | Yes         | 7       | 7-A  | 100    | exp   | Inf | last   | wholeT_0.5  | S1:OT-A, S5:OT-A                                                                                                                                |
| 406 | Yes         | 7       | 7-A  | 100    | exp   | Inf | unif   | singleC     | S1:CBN, S1:OT, S1:OT-A                                                                                                                          |
| 407 | Yes         | 7       | 7-A  | 100    | exp   | Inf | unif   | wholeT_0.01 | J1:OT, J1:OT-A, J5:CBN, J5:CBN-A,<br>J5:OT, J5:OT-A, S1:CBN, S1:CBN-A,<br>S1:OT, S1:OT-A, S5:CBN, S5:CBN-A,<br>S5:OT, S5:OT-A                   |
| 408 | Yes         | 7       | 7-A  | 100    | exp   | Inf | unif   | wholeT_0.5  | S1:CBN, S1:CBN-A, S1:OT, S1:OT-A                                                                                                                |
| 409 | Yes         | 7       | 7-A  | 100    | McF_4 | 0   | last   | singleC     | S1:OT-A                                                                                                                                         |
| 410 | Yes         | 7       | 7-A  | 100    | McF_4 | 0   | last   | wholeT_0.01 | S1:OT-A                                                                                                                                         |
| 411 | Yes         | 7       | 7-A  | 100    | McF_4 | 0   | last   | wholeT_0.5  | J1:OT-A, S1:OT-A                                                                                                                                |
| 412 | Yes         | 7       | 7-A  | 100    | McF_4 | 0   | unif   | singleC     | S1:CBN-A, S1:OT, S1:OT-A                                                                                                                        |
| 413 | Yes         | 7       | 7-A  | 100    | McF_4 | 0   | unif   | wholeT_0.01 | S1:CBN-A, S1:OT, S1:OT-A                                                                                                                        |
| 414 | Yes         | 7       | 7-A  | 100    | McF_4 | 0   | unif   | wholeT_0.5  | J1:OT, J1:OT-A, S1:OT, S1:OT-A,<br>S5:OT, S5:OT-A                                                                                               |
| 415 | Yes         | 7       | 7-A  | 100    | McF_4 | Inf | last   | singleC     | J1:OT-A, J5:OT-A, S1:OT-A, S5:OT-A                                                                                                              |
| 416 | Yes         | 7       | 7-A  | 100    | McF_4 | Inf | last   | wholeT_0.01 | S1:OT-A                                                                                                                                         |
| 417 | Yes         | 7       | 7-A  | 100    | McF_4 | Inf | last   | wholeT_0.5  | J1:OT-A, J5:OT-A, S1:OT-A, S5:OT-A                                                                                                              |

Table 15: (continued)

|     | Conjunction | Drivers | Tree | S.Size | Model | sh  | S.Time | S.Type      | Best method(s)                                                                                                                              |
|-----|-------------|---------|------|--------|-------|-----|--------|-------------|---------------------------------------------------------------------------------------------------------------------------------------------|
| 418 | Yes         | 7       | 7-A  | 100    | McF_4 | Inf | unif   | singleC     | J1:OT, J1:OT-A, S1:OT, S1:OT-A, S5:OT, S5:OT-A                                                                                              |
| 419 | Yes         | 7       | 7-A  | 100    | McF_4 | Inf | unif   | wholeT_0.01 | J1:OT, J1:OT-A, S1:OT, S1:OT-A, S5:OT, S5:OT-A                                                                                              |
| 420 | Yes         | 7       | 7-A  | 100    | McF_4 | Inf | unif   | wholeT_0.5  | J1:OT, J1:OT-A, S1:OT, S1:OT-A, S5:OT, S5:OT-A                                                                                              |
| 421 | Yes         | 7       | 7-A  | 100    | McF_6 | 0   | last   | singleC     | S1:CBN, S1:CBN-A, S1:OT-A, S5:CBN-A, S5:OT-A                                                                                                |
| 422 | Yes         | 7       | 7-A  | 100    | McF_6 | 0   | last   | wholeT_0.01 | J1:OT-A, S1:OT-A, S5:OT-A                                                                                                                   |
| 423 | Yes         | 7       | 7-A  | 100    | McF_6 | 0   | last   | wholeT_0.5  | S1:CBN, S1:CBN-A, S1:OT-A, S5:CBN, S5:CBN-A, S5:OT-A                                                                                        |
| 424 | Yes         | 7       | 7-A  | 100    | McF_6 | 0   | unif   | singleC     | S1:CBN, S1:CBN-A, S1:OT, S1:OT-A                                                                                                            |
| 425 | Yes         | 7       | 7-A  | 100    | McF_6 | 0   | unif   | wholeT_0.01 | S1:CBN, S1:CBN-A, S1:OT, S1:OT-A, S5:CBN-A, S5:OT-A                                                                                         |
| 426 | Yes         | 7       | 7-A  | 100    | McF_6 | 0   | unif   | wholeT_0.5  | S1:CBN-A, S1:OT, S1:OT-A                                                                                                                    |
| 427 | Yes         | 7       | 7-A  | 100    | McF_6 | Inf | last   | singleC     | S1:CBN, S1:CBN-A, S1:OT-A, S5:CBN-A, S5:OT-A                                                                                                |
| 428 | Yes         | 7       | 7-A  | 100    | McF_6 | Inf | last   | wholeT_0.01 | J1:CBN-A, J5:CBN-A, S1:OT-A, S5:OT-A                                                                                                        |
| 429 | Yes         | 7       | 7-A  | 100    | McF_6 | Inf | last   | wholeT_0.5  | S1:CBN, S1:CBN-A, S1:OT-A, S5:CBN, S5:CBN-A, S5:OT-A                                                                                        |
| 430 | Yes         | 7       | 7-A  | 100    | McF_6 | Inf | unif   | singleC     | S1:CBN-A, S1:OT, S1:OT-A                                                                                                                    |
| 431 | Yes         | 7       | 7-A  | 100    | McF_6 | Inf | unif   | wholeT_0.01 | S1:CBN-A, S1:OT-A                                                                                                                           |
| 432 | Yes         | 7       | 7-A  | 100    | McF_6 | Inf | unif   | wholeT_0.5  | S1:CBN-A, S1:OT-A                                                                                                                           |
| 433 | No          | 11      | 11-B | 1000   | Bozic | 0   | last   | singleC     | S1:OT, S1:OT-A                                                                                                                              |
| 434 | No          | 11      | 11-B | 1000   | Bozic | 0   | last   | wholeT_0.01 | S1:DiP, S1:DiP-A, S1:OT, S1:OT-A, S5:DiP-A, S5:OT, S5:OT-A                                                                                  |
| 435 | No          | 11      | 11-B | 1000   | Bozic | 0   | last   | wholeT_0.5  | S1:OT, S1:OT-A                                                                                                                              |
| 436 | No          | 11      | 11-B | 1000   | Bozic | 0   | unif   | singleC     | J1:CBN, J1:CBN-A, J1:DiP-A, J1:OT, J5:CBN, J5:CBN-A, J5:DiP, J5:DiP-A, S1:CBN, S1:CBN-A, S1:DiP, S1:OT, S1:OT-A, S5:CBN-A, S5:DiP, S5:DiP-A |
| 437 | No          | 11      | 11-B | 1000   | Bozic | 0   | unif   | wholeT_0.01 | S1:CBN, S1:CBN-A                                                                                                                            |
| 438 | No          | 11      | 11-B | 1000   | Bozic | 0   | unif   | wholeT_0.5  | none                                                                                                                                        |
| 439 | No          | 11      | 11-B | 1000   | Bozic | Inf | last   | singleC     | S1:OT, S1:OT-A                                                                                                                              |
| 440 | No          | 11      | 11-B | 1000   | Bozic | Inf | last   | wholeT_0.01 | J1:CBN-A, J1:DiP, J1:DiP-A, S1:CBN-A, S1:DiP, S1:DiP-A, S1:OT, S1:OT-A, S5:DiP, S5:DiP-A, S5:OT, S5:OT-A                                    |
| 441 | No          | 11      | 11-B | 1000   | Bozic | Inf | last   | wholeT_0.5  | S1:OT, S1:OT-A                                                                                                                              |



Table 15: (continued)

|     | Conjunction | Drivers | Tree | S.Size | Model | sh  | S.Time | S.Type      | Best method(s)                                                                                                                                                                                |
|-----|-------------|---------|------|--------|-------|-----|--------|-------------|-----------------------------------------------------------------------------------------------------------------------------------------------------------------------------------------------|
| 442 | No          | 11      | 11-B | 1000   | Bozic | Inf | unif   | singleC     | S1:CBN, S1:CBN-A, S1:DiP-A, S1:OT, S1:OT-A                                                                                                                                                    |
| 443 | No          | 11      | 11-B | 1000   | Bozic | Inf | unif   | wholeT_0.01 | S1:CBN, S1:DiP, S1:DiP-A, S1:OT, S1:OT-A, S5:CBN, S5:CBN-A, S5:DiP, S5:DiP-A, S5:OT, S5:OT-A                                                                                                  |
| 444 | No          | 11      | 11-B | 1000   | Bozic | Inf | unif   | wholeT_0.5  | S1:CBN, S1:CBN-A, S1:OT, S1:OT-A                                                                                                                                                              |
| 445 | No          | 11      | 11-B | 1000   | exp   | 0   | last   | singleC     | S1:OT, S1:OT-A                                                                                                                                                                                |
| 446 | No          | 11      | 11-B | 1000   | exp   | 0   | last   | wholeT_0.01 | S1:CBN, S1:DiP-A, S1:OT, S1:OT-A, S5:DiP-A, S5:OT, S5:OT-A                                                                                                                                    |
| 447 | No          | 11      | 11-B | 1000   | exp   | 0   | last   | wholeT_0.5  | S1:OT, S1:OT-A                                                                                                                                                                                |
| 448 | No          | 11      | 11-B | 1000   | exp   | 0   | unif   | singleC     | J1:CBN, J1:CBN-A, J1:DiP, J1:DiP-A, J1:OT, J1:OT-A, J5:CBN, J5:CBN-A, J5:DiP, J5:DiP-A, J5:OT, S1:CBN-A, S1:DiP, S1:DiP-A, S1:OT, S1:OT-A, S5:CBN, S5:CBN-A, S5:DiP, S5:DiP-A, S5:OT, S5:OT-A |
| 449 | No          | 11      | 11-B | 1000   | exp   | 0   | unif   | wholeT_0.01 | S1:CBN, S1:CBN-A, S1:OT, S1:OT-A                                                                                                                                                              |
| 450 | No          | 11      | 11-B | 1000   | exp   | 0   | unif   | wholeT_0.5  | none                                                                                                                                                                                          |
| 451 | No          | 11      | 11-B | 1000   | exp   | Inf | last   | singleC     | S1:DiP, S1:DiP-A, S1:OT, S1:OT-A, S5:DiP, S5:DiP-A, S5:OT, S5:OT-A                                                                                                                            |
| 452 | No          | 11      | 11-B | 1000   | exp   | Inf | last   | wholeT_0.01 | J1:DiP, J1:DiP-A, J1:OT, J1:OT-A, S1:DiP, S1:DiP-A, S1:OT, S1:OT-A, S5:DiP, S5:DiP-A, S5:OT                                                                                                   |
| 453 | No          | 11      | 11-B | 1000   | exp   | Inf | last   | wholeT_0.5  | S1:OT, S1:OT-A                                                                                                                                                                                |
| 454 | No          | 11      | 11-B | 1000   | exp   | Inf | unif   | singleC     | S1:OT, S1:OT-A                                                                                                                                                                                |
| 455 | No          | 11      | 11-B | 1000   | exp   | Inf | unif   | wholeT_0.01 | S1:CBN, S1:CBN-A, S1:DiP-A, S1:OT, S1:OT-A                                                                                                                                                    |
| 456 | No          | 11      | 11-B | 1000   | exp   | Inf | unif   | wholeT_0.5  | S1:OT, S1:OT-A                                                                                                                                                                                |
| 457 | No          | 11      | 11-B | 1000   | McF_4 | 0   | last   | singleC     | S1:DiP, S1:DiP-A, S1:OT, S1:OT-A                                                                                                                                                              |
| 458 | No          | 11      | 11-B | 1000   | McF_4 | 0   | last   | wholeT_0.01 | S1:DiP, S1:DiP-A, S1:OT, S1:OT-A                                                                                                                                                              |
| 459 | No          | 11      | 11-B | 1000   | McF_4 | 0   | last   | wholeT_0.5  | S1:DiP-A, S1:OT, S1:OT-A                                                                                                                                                                      |
| 460 | No          | 11      | 11-B | 1000   | McF_4 | 0   | unif   | singleC     | S1:DiP-A, S1:OT, S1:OT-A                                                                                                                                                                      |
| 461 | No          | 11      | 11-B | 1000   | McF_4 | 0   | unif   | wholeT_0.01 | S1:CBN, S1:OT, S1:OT-A                                                                                                                                                                        |
| 462 | No          | 11      | 11-B | 1000   | McF_4 | 0   | unif   | wholeT_0.5  | S1:DiP, S1:DiP-A, S1:OT, S1:OT-A                                                                                                                                                              |
| 463 | No          | 11      | 11-B | 1000   | McF_4 | Inf | last   | singleC     | S1:OT, S1:OT-A                                                                                                                                                                                |
| 464 | No          | 11      | 11-B | 1000   | McF_4 | Inf | last   | wholeT_0.01 | S1:DiP, S1:DiP-A, S1:OT, S1:OT-A, S5:DiP, S5:OT                                                                                                                                               |
| 465 | No          | 11      | 11-B | 1000   | McF_4 | Inf | last   | wholeT_0.5  | S1:DiP-A, S1:OT, S1:OT-A                                                                                                                                                                      |
| 466 | No          | 11      | 11-B | 1000   | McF_4 | Inf | unif   | singleC     | S1:OT, S1:OT-A                                                                                                                                                                                |
| 467 | No          | 11      | 11-B | 1000   | McF_4 | Inf | unif   | wholeT_0.01 | S1:OT, S1:OT-A                                                                                                                                                                                |

Table 15: (continued)

|     | Conjunction | Drivers | Tree | S.Size | Model | sh  | S.Time | S.Type      | Best method(s)                                                        |
|-----|-------------|---------|------|--------|-------|-----|--------|-------------|-----------------------------------------------------------------------|
| 468 | No          | 11      | 11-B | 1000   | McF_4 | Inf | unif   | wholeT_0.5  | S1:CBN, S1:OT, S1:OT-A                                                |
| 469 | No          | 11      | 11-B | 1000   | McF_6 | 0   | last   | singleC     | S1:DiP, S1:DiP-A, S1:OT, S1:OT-A,<br>S5:DiP, S5:DiP-A, S5:OT, S5:OT-A |
| 470 | No          | 11      | 11-B | 1000   | McF_6 | 0   | last   | wholeT_0.01 | S1:DiP, S1:DiP-A, S1:OT, S1:OT-A,<br>S5:DiP, S5:DiP-A, S5:OT, S5:OT-A |
| 471 | No          | 11      | 11-B | 1000   | McF_6 | 0   | last   | wholeT_0.5  | S1:DiP, S1:DiP-A, S1:OT, S1:OT-A,<br>S5:DiP, S5:DiP-A, S5:OT, S5:OT-A |
| 472 | No          | 11      | 11-B | 1000   | McF_6 | 0   | unif   | singleC     | S1:DiP, S1:DiP-A, S1:OT, S1:OT-A                                      |
| 473 | No          | 11      | 11-B | 1000   | McF_6 | 0   | unif   | wholeT_0.01 | S1:DiP, S1:DiP-A, S1:OT, S1:OT-A                                      |
| 474 | No          | 11      | 11-B | 1000   | McF_6 | 0   | unif   | wholeT_0.5  | S1:DiP, S1:DiP-A, S1:OT, S1:OT-A                                      |
| 475 | No          | 11      | 11-B | 1000   | McF_6 | Inf | last   | singleC     | S1:DiP, S1:DiP-A, S1:OT, S1:OT-A,<br>S5:DiP, S5:DiP-A, S5:OT, S5:OT-A |
| 476 | No          | 11      | 11-B | 1000   | McF_6 | Inf | last   | wholeT_0.01 | S1:DiP-A, S1:OT, S1:OT-A, S5:DiP-A,<br>S5:OT, S5:OT-A                 |
| 477 | No          | 11      | 11-B | 1000   | McF_6 | Inf | last   | wholeT_0.5  | S1:DiP, S1:DiP-A, S1:OT, S1:OT-A,<br>S5:DiP, S5:DiP-A, S5:OT, S5:OT-A |
| 478 | No          | 11      | 11-B | 1000   | McF_6 | Inf | unif   | singleC     | S1:DiP, S1:DiP-A, S1:OT, S1:OT-A                                      |
| 479 | No          | 11      | 11-B | 1000   | McF_6 | Inf | unif   | wholeT_0.01 | S1:DiP, S1:DiP-A, S1:OT, S1:OT-A                                      |
| 480 | No          | 11      | 11-B | 1000   | McF_6 | Inf | unif   | wholeT_0.5  | S1:DiP, S1:DiP-A, S1:OT, S1:OT-A                                      |
| 481 | No          | 11      | 11-B | 200    | Bozic | 0   | last   | singleC     | S1:CBN-A, S1:OT, S1:OT-A                                              |
| 482 | No          | 11      | 11-B | 200    | Bozic | 0   | last   | wholeT_0.01 | S1:CBN-A, S1:OT, S1:OT-A, S5:OT-A                                     |
| 483 | No          | 11      | 11-B | 200    | Bozic | 0   | last   | wholeT_0.5  | S1:CBN, S1:CBN-A, S1:OT, S1:OT-A                                      |
| 484 | No          | 11      | 11-B | 200    | Bozic | 0   | unif   | singleC     | S1:CBN, S1:OT, S1:OT-A                                                |
| 485 | No          | 11      | 11-B | 200    | Bozic | 0   | unif   | wholeT_0.01 | S1:CBN, S1:CBN-A                                                      |
| 486 | No          | 11      | 11-B | 200    | Bozic | 0   | unif   | wholeT_0.5  | S1:CBN, S1:CBN-A, S1:OT, S1:OT-A                                      |
| 487 | No          | 11      | 11-B | 200    | Bozic | Inf | last   | singleC     | S1:CBN, S1:OT, S1:OT-A                                                |
| 488 | No          | 11      | 11-B | 200    | Bozic | Inf | last   | wholeT_0.01 | J1:OT, J1:OT-A, S1:OT, S1:OT-A,<br>S5:OT, S5:OT-A                     |
| 489 | No          | 11      | 11-B | 200    | Bozic | Inf | last   | wholeT_0.5  | S1:OT, S1:OT-A                                                        |
| 490 | No          | 11      | 11-B | 200    | Bozic | Inf | unif   | singleC     | S1:CBN, S1:CBN-A, S1:OT, S1:OT-A                                      |
| 491 | No          | 11      | 11-B | 200    | Bozic | Inf | unif   | wholeT_0.01 | S1:CBN, S1:CBN-A, S1:OT, S1:OT-A,<br>S5:CBN, S5:CBN-A, S5:OT, S5:OT-A |
| 492 | No          | 11      | 11-B | 200    | Bozic | Inf | unif   | wholeT_0.5  | S1:CBN, S1:CBN-A, S1:OT, S1:OT-A                                      |
| 493 | No          | 11      | 11-B | 200    | exp   | 0   | last   | singleC     | S1:OT, S1:OT-A                                                        |
| 494 | No          | 11      | 11-B | 200    | exp   | 0   | last   | wholeT_0.01 | S1:CBN, S1:CBN-A, S1:OT, S1:OT-A                                      |
| 495 | No          | 11      | 11-B | 200    | exp   | 0   | last   | wholeT_0.5  | S1:OT, S1:OT-A                                                        |

Table 15: (continued)

|     | Conjunction | Drivers | Tree | S.Size | Model | sh  | S.Time | S.Type      | Best method(s)                                                                                                                                                                                        |
|-----|-------------|---------|------|--------|-------|-----|--------|-------------|-------------------------------------------------------------------------------------------------------------------------------------------------------------------------------------------------------|
| 496 | No          | 11      | 11-B | 200    | exp   | 0   | unif   | singleC     | J1:CBN, J1:CBN-A, J1:DiP, J1:DiP-A, J1:OT, J1:OT-A, J5:CBN, J5:CBN-A, J5:DiP, J5:DiP-A, J5:OT, J5:OT-A, S1:CBN, S1:CBN-A, S1:DiP, S1:DiP-A, S1:OT, S1:OT-A, S5:CBN, S5:CBN-A, S5:DiP, S5:DiP-A, S5:OT |
| 497 | No          | 11      | 11-B | 200    | exp   | 0   | unif   | wholeT_0.01 | S1:CBN, S1:CBN-A, S1:OT, S1:OT-A                                                                                                                                                                      |
| 498 | No          | 11      | 11-B | 200    | exp   | 0   | unif   | wholeT_0.5  | none                                                                                                                                                                                                  |
| 499 | No          | 11      | 11-B | 200    | exp   | Inf | last   | singleC     | S1:CBN, S1:OT, S1:OT-A                                                                                                                                                                                |
| 500 | No          | 11      | 11-B | 200    | exp   | Inf | last   | wholeT_0.01 | J1:OT, S1:OT, S1:OT-A, S5:OT, S5:OT-A                                                                                                                                                                 |
| 501 | No          | 11      | 11-B | 200    | exp   | Inf | last   | wholeT_0.5  | S1:OT, S1:OT-A                                                                                                                                                                                        |
| 502 | No          | 11      | 11-B | 200    | exp   | Inf | unif   | singleC     | S1:CBN, S1:CBN-A, S1:OT, S1:OT-A                                                                                                                                                                      |
| 503 | No          | 11      | 11-B | 200    | exp   | Inf | unif   | wholeT_0.01 | S1:CBN, S1:CBN-A, S1:OT, S1:OT-A                                                                                                                                                                      |
| 504 | No          | 11      | 11-B | 200    | exp   | Inf | unif   | wholeT_0.5  | S1:CBN, S1:CBN-A, S1:OT, S1:OT-A                                                                                                                                                                      |
| 505 | No          | 11      | 11-B | 200    | McF_4 | 0   | last   | singleC     | S1:OT, S1:OT-A                                                                                                                                                                                        |
| 506 | No          | 11      | 11-B | 200    | McF_4 | 0   | last   | wholeT_0.01 | S1:OT, S1:OT-A                                                                                                                                                                                        |
| 507 | No          | 11      | 11-B | 200    | McF_4 | 0   | last   | wholeT_0.5  | S1:OT, S1:OT-A                                                                                                                                                                                        |
| 508 | No          | 11      | 11-B | 200    | McF_4 | 0   | unif   | singleC     | S1:CBN-A, S1:OT, S1:OT-A                                                                                                                                                                              |
| 509 | No          | 11      | 11-B | 200    | McF_4 | 0   | unif   | wholeT_0.01 | S1:CBN, S1:CBN-A, S1:OT, S1:OT-A                                                                                                                                                                      |
| 510 | No          | 11      | 11-B | 200    | McF_4 | 0   | unif   | wholeT_0.5  | S1:OT, S1:OT-A                                                                                                                                                                                        |
| 511 | No          | 11      | 11-B | 200    | McF_4 | Inf | last   | singleC     | S1:OT, S1:OT-A                                                                                                                                                                                        |
| 512 | No          | 11      | 11-B | 200    | McF_4 | Inf | last   | wholeT_0.01 | S1:OT, S1:OT-A, S5:OT, S5:OT-A                                                                                                                                                                        |
| 513 | No          | 11      | 11-B | 200    | McF_4 | Inf | last   | wholeT_0.5  | S1:OT, S1:OT-A                                                                                                                                                                                        |
| 514 | No          | 11      | 11-B | 200    | McF_4 | Inf | unif   | singleC     | S1:OT, S1:OT-A                                                                                                                                                                                        |
| 515 | No          | 11      | 11-B | 200    | McF_4 | Inf | unif   | wholeT_0.01 | S1:OT, S1:OT-A                                                                                                                                                                                        |
| 516 | No          | 11      | 11-B | 200    | McF_4 | Inf | unif   | wholeT_0.5  | S1:OT, S1:OT-A                                                                                                                                                                                        |
| 517 | No          | 11      | 11-B | 200    | McF_6 | 0   | last   | singleC     | S1:OT, S1:OT-A, S5:OT, S5:OT-A                                                                                                                                                                        |
| 518 | No          | 11      | 11-B | 200    | McF_6 | 0   | last   | wholeT_0.01 | S1:OT, S1:OT-A, S5:OT, S5:OT-A                                                                                                                                                                        |
| 519 | No          | 11      | 11-B | 200    | McF_6 | 0   | last   | wholeT_0.5  | S1:OT, S1:OT-A, S5:OT, S5:OT-A                                                                                                                                                                        |
| 520 | No          | 11      | 11-B | 200    | McF_6 | 0   | unif   | singleC     | S1:OT, S1:OT-A                                                                                                                                                                                        |
| 521 | No          | 11      | 11-B | 200    | McF_6 | 0   | unif   | wholeT_0.01 | S1:OT, S1:OT-A                                                                                                                                                                                        |
| 522 | No          | 11      | 11-B | 200    | McF_6 | 0   | unif   | wholeT_0.5  | S1:OT, S1:OT-A                                                                                                                                                                                        |
| 523 | No          | 11      | 11-B | 200    | McF_6 | Inf | last   | singleC     | S1:OT, S1:OT-A, S5:OT, S5:OT-A                                                                                                                                                                        |
| 524 | No          | 11      | 11-B | 200    | McF_6 | Inf | last   | wholeT_0.01 | S1:OT, S1:OT-A, S5:OT, S5:OT-A                                                                                                                                                                        |
| 525 | No          | 11      | 11-B | 200    | McF_6 | Inf | last   | wholeT_0.5  | S1:OT, S1:OT-A, S5:OT                                                                                                                                                                                 |
| 526 | No          | 11      | 11-B | 200    | McF_6 | Inf | unif   | singleC     | S1:OT, S1:OT-A                                                                                                                                                                                        |
| 527 | No          | 11      | 11-B | 200    | McF_6 | Inf | unif   | wholeT_0.01 | S1:OT, S1:OT-A                                                                                                                                                                                        |
| 528 | No          | 11      | 11-B | 200    | McF_6 | Inf | unif   | wholeT_0.5  | S1:OT, S1:OT-A                                                                                                                                                                                        |
| 529 | No          | 11      | 11-B | 100    | Bozic | 0   | last   | singleC     | S1:CBN, S1:CBN-A, S1:OT, S1:OT-A                                                                                                                                                                      |

Table 15: (continued)

|     | Conjunction | Drivers | Tree | S.Size | Model | sh  | S.Time | S.Type      | Best method(s)                                                                    |
|-----|-------------|---------|------|--------|-------|-----|--------|-------------|-----------------------------------------------------------------------------------|
| 530 | No          | 11      | 11-B | 100    | Bozic | 0   | last   | wholeT_0.01 | S1:CBN, S1:CBN-A, S1:OT, S1:OT-A                                                  |
| 531 | No          | 11      | 11-B | 100    | Bozic | 0   | last   | wholeT_0.5  | S1:OT, S1:OT-A                                                                    |
| 532 | No          | 11      | 11-B | 100    | Bozic | 0   | unif   | singleC     | S1:CBN, S1:CBN-A, S1:OT, S1:OT-A                                                  |
| 533 | No          | 11      | 11-B | 100    | Bozic | 0   | unif   | wholeT_0.01 | S1:CBN, S1:CBN-A                                                                  |
| 534 | No          | 11      | 11-B | 100    | Bozic | 0   | unif   | wholeT_0.5  | S1:CBN, S1:CBN-A, S1:OT, S1:OT-A                                                  |
| 535 | No          | 11      | 11-B | 100    | Bozic | Inf | last   | singleC     | S1:CBN, S1:OT, S1:OT-A                                                            |
| 536 | No          | 11      | 11-B | 100    | Bozic | Inf | last   | wholeT_0.01 | J1:OT, J1:OT-A, S1:CBN-A, S1:OT, S1:OT-A, S5:CBN-A, S5:OT, S5:OT-A                |
| 537 | No          | 11      | 11-B | 100    | Bozic | Inf | last   | wholeT_0.5  | S1:OT, S1:OT-A                                                                    |
| 538 | No          | 11      | 11-B | 100    | Bozic | Inf | unif   | singleC     | S1:CBN, S1:CBN-A, S1:OT, S1:OT-A                                                  |
| 539 | No          | 11      | 11-B | 100    | Bozic | Inf | unif   | wholeT_0.01 | J1:CBN, J1:CBN-A, J1:OT, J1:OT-A, S1:CBN, S1:CBN-A, S1:OT, S1:OT-A, S5:CBN, S5:OT |
| 540 | No          | 11      | 11-B | 100    | Bozic | Inf | unif   | wholeT_0.5  | S1:CBN, S1:CBN-A, S1:OT, S1:OT-A                                                  |
| 541 | No          | 11      | 11-B | 100    | exp   | 0   | last   | singleC     | S1:OT, S1:OT-A                                                                    |
| 542 | No          | 11      | 11-B | 100    | exp   | 0   | last   | wholeT_0.01 | S1:CBN, S1:OT, S1:OT-A                                                            |
| 543 | No          | 11      | 11-B | 100    | exp   | 0   | last   | wholeT_0.5  | S1:CBN-A, S1:OT, S1:OT-A                                                          |
| 544 | No          | 11      | 11-B | 100    | exp   | 0   | unif   | singleC     | J1:CBN, J1:CBN-A, J1:OT, J1:OT-A, S1:CBN, S1:CBN-A, S1:OT, S1:OT-A                |
| 545 | No          | 11      | 11-B | 100    | exp   | 0   | unif   | wholeT_0.01 | S1:CBN, S1:CBN-A, S1:OT, S1:OT-A                                                  |
| 546 | No          | 11      | 11-B | 100    | exp   | 0   | unif   | wholeT_0.5  | J1:CBN, J1:CBN-A, J1:OT, J1:OT-A, S1:CBN, S1:CBN-A, S1:OT, S1:OT-A                |
| 547 | No          | 11      | 11-B | 100    | exp   | Inf | last   | singleC     | S1:OT, S1:OT-A                                                                    |
| 548 | No          | 11      | 11-B | 100    | exp   | Inf | last   | wholeT_0.01 | J1:CBN-A, S1:OT, S1:OT-A, S5:CBN-A, S5:OT, S5:OT-A                                |
| 549 | No          | 11      | 11-B | 100    | exp   | Inf | last   | wholeT_0.5  | S1:OT, S1:OT-A                                                                    |
| 550 | No          | 11      | 11-B | 100    | exp   | Inf | unif   | singleC     | S1:CBN, S1:OT, S1:OT-A                                                            |
| 551 | No          | 11      | 11-B | 100    | exp   | Inf | unif   | wholeT_0.01 | S1:CBN, S1:CBN-A, S1:OT, S1:OT-A                                                  |
| 552 | No          | 11      | 11-B | 100    | exp   | Inf | unif   | wholeT_0.5  | S1:OT, S1:OT-A                                                                    |
| 553 | No          | 11      | 11-B | 100    | McF_4 | 0   | last   | singleC     | S1:OT, S1:OT-A                                                                    |
| 554 | No          | 11      | 11-B | 100    | McF_4 | 0   | last   | wholeT_0.01 | S1:OT, S1:OT-A, S5:OT, S5:OT-A                                                    |
| 555 | No          | 11      | 11-B | 100    | McF_4 | 0   | last   | wholeT_0.5  | S1:OT, S1:OT-A                                                                    |
| 556 | No          | 11      | 11-B | 100    | McF_4 | 0   | unif   | singleC     | S1:CBN, S1:CBN-A, S1:OT, S1:OT-A                                                  |
| 557 | No          | 11      | 11-B | 100    | McF_4 | 0   | unif   | wholeT_0.01 | S1:CBN, S1:CBN-A, S1:OT, S1:OT-A                                                  |
| 558 | No          | 11      | 11-B | 100    | McF_4 | 0   | unif   | wholeT_0.5  | S1:CBN, S1:OT, S1:OT-A                                                            |
| 559 | No          | 11      | 11-B | 100    | McF_4 | Inf | last   | singleC     | S1:OT, S1:OT-A                                                                    |
| 560 | No          | 11      | 11-B | 100    | McF_4 | Inf | last   | wholeT_0.01 | S1:OT, S1:OT-A, S5:OT-A                                                           |
| 561 | No          | 11      | 11-B | 100    | McF_4 | Inf | last   | wholeT_0.5  | S1:OT, S1:OT-A                                                                    |
| 562 | No          | 11      | 11-B | 100    | McF_4 | Inf | unif   | singleC     | S1:OT, S1:OT-A                                                                    |
| 563 | No          | 11      | 11-B | 100    | McF_4 | Inf | unif   | wholeT_0.01 | S1:OT, S1:OT-A                                                                    |

Table 15: (continued)

|     | Conjunction | Drivers | Tree | S.Size | Model | sh  | S.Time | S.Type      | Best method(s)                                                                                                                                                                                                        |
|-----|-------------|---------|------|--------|-------|-----|--------|-------------|-----------------------------------------------------------------------------------------------------------------------------------------------------------------------------------------------------------------------|
| 564 | No          | 11      | 11-B | 100    | McF_4 | Inf | unif   | wholeT_0.5  | S1:OT, S1:OT-A                                                                                                                                                                                                        |
| 565 | No          | 11      | 11-B | 100    | McF_6 | 0   | last   | singleC     | S1:OT, S1:OT-A, S5:OT, S5:OT-A                                                                                                                                                                                        |
| 566 | No          | 11      | 11-B | 100    | McF_6 | 0   | last   | wholeT_0.01 | S1:OT, S1:OT-A, S5:OT, S5:OT-A                                                                                                                                                                                        |
| 567 | No          | 11      | 11-B | 100    | McF_6 | 0   | last   | wholeT_0.5  | S1:OT, S1:OT-A, S5:OT, S5:OT-A                                                                                                                                                                                        |
| 568 | No          | 11      | 11-B | 100    | McF_6 | 0   | unif   | singleC     | S1:OT, S1:OT-A                                                                                                                                                                                                        |
| 569 | No          | 11      | 11-B | 100    | McF_6 | 0   | unif   | wholeT_0.01 | S1:OT, S1:OT-A                                                                                                                                                                                                        |
| 570 | No          | 11      | 11-B | 100    | McF_6 | 0   | unif   | wholeT_0.5  | S1:OT, S1:OT-A                                                                                                                                                                                                        |
| 571 | No          | 11      | 11-B | 100    | McF_6 | Inf | last   | singleC     | S1:OT, S1:OT-A, S5:OT, S5:OT-A                                                                                                                                                                                        |
| 572 | No          | 11      | 11-B | 100    | McF_6 | Inf | last   | wholeT_0.01 | S1:OT, S1:OT-A, S5:OT, S5:OT-A                                                                                                                                                                                        |
| 573 | No          | 11      | 11-B | 100    | McF_6 | Inf | last   | wholeT_0.5  | S1:OT, S1:OT-A, S5:OT, S5:OT-A                                                                                                                                                                                        |
| 574 | No          | 11      | 11-B | 100    | McF_6 | Inf | unif   | singleC     | S1:OT, S1:OT-A                                                                                                                                                                                                        |
| 575 | No          | 11      | 11-B | 100    | McF_6 | Inf | unif   | wholeT_0.01 | S1:OT, S1:OT-A                                                                                                                                                                                                        |
| 576 | No          | 11      | 11-B | 100    | McF_6 | Inf | unif   | wholeT_0.5  | S1:OT, S1:OT-A                                                                                                                                                                                                        |
| 577 | No          | 9       | 9-B  | 1000   | Bozic | 0   | last   | singleC     | S1:CBN-A, S1:OT, S1:OT-A                                                                                                                                                                                              |
| 578 | No          | 9       | 9-B  | 1000   | Bozic | 0   | last   | wholeT_0.01 | S1:CBN-A, S1:DiP, S1:DiP-A, S1:OT,<br>S1:OT-A, S5:CBN-A, S5:DiP, S5:DiP-A,<br>S5:OT, S5:OT-A                                                                                                                          |
| 579 | No          | 9       | 9-B  | 1000   | Bozic | 0   | last   | wholeT_0.5  | S1:OT, S1:OT-A                                                                                                                                                                                                        |
| 580 | No          | 9       | 9-B  | 1000   | Bozic | 0   | unif   | singleC     | none                                                                                                                                                                                                                  |
| 581 | No          | 9       | 9-B  | 1000   | Bozic | 0   | unif   | wholeT_0.01 | S1:CBN, S1:CBN-A, S1:OT, S1:OT-A                                                                                                                                                                                      |
| 582 | No          | 9       | 9-B  | 1000   | Bozic | 0   | unif   | wholeT_0.5  | J1:CBN, J1:CBN-A, J1:DiP-A, J1:OT,<br>J1:OT-A, J5:CBN, J5:CBN-A, J5:DiP,<br>J5:DiP-A, J5:OT, J5:OT-A, S1:CBN,<br>S1:CBN-A, S1:DiP, S1:DiP-A, S1:OT,<br>S1:OT-A, S5:CBN, S5:CBN-A, S5:DiP,<br>S5:DiP-A, S5:OT, S5:OT-A |
| 583 | No          | 9       | 9-B  | 1000   | Bozic | Inf | last   | singleC     | S1:CBN-A, S1:DiP, S1:DiP-A, S1:OT,<br>S1:OT-A, S5:DiP, S5:DiP-A, S5:OT,<br>S5:OT-A                                                                                                                                    |
| 584 | No          | 9       | 9-B  | 1000   | Bozic | Inf | last   | wholeT_0.01 | J1:DiP, J1:DiP-A, J1:OT, J1:OT-A,<br>S1:DiP, S1:DiP-A, S1:OT, S1:OT-A,<br>S5:DiP, S5:DiP-A, S5:OT-A                                                                                                                   |
| 585 | No          | 9       | 9-B  | 1000   | Bozic | Inf | last   | wholeT_0.5  | S1:CBN, S1:CBN-A, S1:DiP, S1:DiP-<br>A, S1:OT, S1:OT-A, S5:DiP, S5:DiP-A,<br>S5:OT-A                                                                                                                                  |
| 586 | No          | 9       | 9-B  | 1000   | Bozic | Inf | unif   | singleC     | S1:CBN, S1:CBN-A, S1:OT, S1:OT-A                                                                                                                                                                                      |
| 587 | No          | 9       | 9-B  | 1000   | Bozic | Inf | unif   | wholeT_0.01 | S1:CBN, S1:CBN-A, S1:DiP, S1:DiP-A,<br>S1:OT, S1:OT-A, S5:CBN-A, S5:DiP,<br>S5:DiP-A, S5:OT, S5:OT-A                                                                                                                  |
| 588 | No          | 9       | 9-B  | 1000   | Bozic | Inf | unif   | wholeT_0.5  | S1:CBN-A, S1:OT, S1:OT-A                                                                                                                                                                                              |

Table 15: (continued)

|     | Conjunction | Drivers | Tree | S.Size | Model | sh  | S.Time | S.Type      | Best method(s)                                                                                                                                                                                         |
|-----|-------------|---------|------|--------|-------|-----|--------|-------------|--------------------------------------------------------------------------------------------------------------------------------------------------------------------------------------------------------|
| 589 | No          | 9       | 9-B  | 1000   | exp   | 0   | last   | singleC     | S1:OT, S1:OT-A                                                                                                                                                                                         |
| 590 | No          | 9       | 9-B  | 1000   | exp   | 0   | last   | wholeT_0.01 | S1:CBN, S1:CBN-A, S1:DiP-A, S1:OT, S1:OT-A                                                                                                                                                             |
| 591 | No          | 9       | 9-B  | 1000   | exp   | 0   | last   | wholeT_0.5  | none                                                                                                                                                                                                   |
| 592 | No          | 9       | 9-B  | 1000   | exp   | 0   | unif   | singleC     | none                                                                                                                                                                                                   |
| 593 | No          | 9       | 9-B  | 1000   | exp   | 0   | unif   | wholeT_0.01 | J1:CBN, J1:CBN-A, J5:CBN-A, J5:DiP-A, S1:DiP, S1:DiP-A, S1:OT, S1:OT-A, S5:DiP-A                                                                                                                       |
| 594 | No          | 9       | 9-B  | 1000   | exp   | 0   | unif   | wholeT_0.5  | J1:CBN, J1:CBN-A, J1:DiP, J1:DiP-A, J1:OT, J1:OT-A, J5:CBN, J5:CBN-A, J5:DiP, J5:DiP-A, J5:OT, J5:OT-A, S1:CBN, S1:CBN-A, S1:DiP, S1:DiP-A, S1:OT, S1:OT-A, S5:CBN-A, S5:DiP, S5:DiP-A, S5:OT, S5:OT-A |
| 595 | No          | 9       | 9-B  | 1000   | exp   | Inf | last   | singleC     | S1:DiP, S1:DiP-A, S1:OT, S1:OT-A, S5:DiP, S5:DiP-A, S5:OT, S5:OT-A                                                                                                                                     |
| 596 | No          | 9       | 9-B  | 1000   | exp   | Inf | last   | wholeT_0.01 | J1:DiP, J1:DiP-A, J1:OT, J1:OT-A, S1:CBN, S1:CBN-A, S1:DiP, S1:DiP-A, S1:OT, S1:OT-A, S5:CBN, S5:CBN-A, S5:DiP, S5:DiP-A, S5:OT, S5:OT-A                                                               |
| 597 | No          | 9       | 9-B  | 1000   | exp   | Inf | last   | wholeT_0.5  | S1:CBN, S1:CBN-A, S1:DiP, S1:DiP-A, S1:OT, S1:OT-A, S5:DiP, S5:OT, S5:OT-A                                                                                                                             |
| 598 | No          | 9       | 9-B  | 1000   | exp   | Inf | unif   | singleC     | S1:CBN, S1:OT, S1:OT-A                                                                                                                                                                                 |
| 599 | No          | 9       | 9-B  | 1000   | exp   | Inf | unif   | wholeT_0.01 | S1:CBN, S1:CBN-A, S1:OT, S1:OT-A                                                                                                                                                                       |
| 600 | No          | 9       | 9-B  | 1000   | exp   | Inf | unif   | wholeT_0.5  | S1:CBN-A, S1:OT, S1:OT-A                                                                                                                                                                               |
| 601 | No          | 9       | 9-B  | 1000   | McF_4 | 0   | last   | singleC     | S1:DiP-A, S1:OT, S1:OT-A                                                                                                                                                                               |
| 602 | No          | 9       | 9-B  | 1000   | McF_4 | 0   | last   | wholeT_0.01 | S1:DiP, S1:DiP-A, S1:OT, S1:OT-A, S5:DiP, S5:DiP-A, S5:OT, S5:OT-A                                                                                                                                     |
| 603 | No          | 9       | 9-B  | 1000   | McF_4 | 0   | last   | wholeT_0.5  | S1:DiP-A, S1:OT, S1:OT-A                                                                                                                                                                               |
| 604 | No          | 9       | 9-B  | 1000   | McF_4 | 0   | unif   | singleC     | S1:DiP, S1:DiP-A, S1:OT, S1:OT-A                                                                                                                                                                       |
| 605 | No          | 9       | 9-B  | 1000   | McF_4 | 0   | unif   | wholeT_0.01 | S1:CBN, S1:DiP-A, S1:OT, S1:OT-A                                                                                                                                                                       |
| 606 | No          | 9       | 9-B  | 1000   | McF_4 | 0   | unif   | wholeT_0.5  | S1:DiP, S1:DiP-A, S1:OT, S1:OT-A                                                                                                                                                                       |
| 607 | No          | 9       | 9-B  | 1000   | McF_4 | Inf | last   | singleC     | S1:OT, S1:OT-A                                                                                                                                                                                         |
| 608 | No          | 9       | 9-B  | 1000   | McF_4 | Inf | last   | wholeT_0.01 | S1:DiP, S1:DiP-A, S1:OT, S1:OT-A, S5:DiP, S5:DiP-A, S5:OT, S5:OT-A                                                                                                                                     |
| 609 | No          | 9       | 9-B  | 1000   | McF_4 | Inf | last   | wholeT_0.5  | S1:OT, S1:OT-A                                                                                                                                                                                         |
| 610 | No          | 9       | 9-B  | 1000   | McF_4 | Inf | unif   | singleC     | S1:DiP, S1:OT, S1:OT-A                                                                                                                                                                                 |
| 611 | No          | 9       | 9-B  | 1000   | McF_4 | Inf | unif   | wholeT_0.01 | S1:DiP-A, S1:OT, S1:OT-A                                                                                                                                                                               |
| 612 | No          | 9       | 9-B  | 1000   | McF_4 | Inf | unif   | wholeT_0.5  | S1:CBN, S1:DiP, S1:OT, S1:OT-A                                                                                                                                                                         |

Table 15: (continued)

|     | Conjunction | Drivers | Tree | S.Size | Model | sh  | S.Time | S.Type      | Best method(s)                                                                                                                                                                      |
|-----|-------------|---------|------|--------|-------|-----|--------|-------------|-------------------------------------------------------------------------------------------------------------------------------------------------------------------------------------|
| 613 | No          | 9       | 9-B  | 1000   | McF_6 | 0   | last   | singleC     | S1:DiP-A, S1:OT-A, S5:DiP-A, S5:OT-A                                                                                                                                                |
| 614 | No          | 9       | 9-B  | 1000   | McF_6 | 0   | last   | wholeT_0.01 | J1:DiP-A, J1:OT-A, S1:DiP-A, S1:OT-A, S5:DiP-A, S5:OT-A                                                                                                                             |
| 615 | No          | 9       | 9-B  | 1000   | McF_6 | 0   | last   | wholeT_0.5  | S1:OT-A, S5:DiP-A, S5:OT-A                                                                                                                                                          |
| 616 | No          | 9       | 9-B  | 1000   | McF_6 | 0   | unif   | singleC     | S1:CBN, S1:DiP, S1:DiP-A, S1:OT, S1:OT-A                                                                                                                                            |
| 617 | No          | 9       | 9-B  | 1000   | McF_6 | 0   | unif   | wholeT_0.01 | S1:DiP, S1:DiP-A, S1:OT, S1:OT-A, S5:DiP, S5:OT, S5:OT-A                                                                                                                            |
| 618 | No          | 9       | 9-B  | 1000   | McF_6 | 0   | unif   | wholeT_0.5  | S1:DiP, S1:DiP-A, S1:OT, S1:OT-A                                                                                                                                                    |
| 619 | No          | 9       | 9-B  | 1000   | McF_6 | Inf | last   | singleC     | S1:DiP-A, S1:OT-A, S5:DiP-A, S5:OT-A                                                                                                                                                |
| 620 | No          | 9       | 9-B  | 1000   | McF_6 | Inf | last   | wholeT_0.01 | S1:DiP-A, S1:OT-A, S5:DiP-A, S5:OT-A                                                                                                                                                |
| 621 | No          | 9       | 9-B  | 1000   | McF_6 | Inf | last   | wholeT_0.5  | S1:DiP-A, S1:OT-A, S5:DiP-A, S5:OT-A                                                                                                                                                |
| 622 | No          | 9       | 9-B  | 1000   | McF_6 | Inf | unif   | singleC     | S1:CBN, S1:CBN-A, S1:DiP, S1:DiP-A, S1:OT, S1:OT-A                                                                                                                                  |
| 623 | No          | 9       | 9-B  | 1000   | McF_6 | Inf | unif   | wholeT_0.01 | S1:DiP, S1:DiP-A, S1:OT, S1:OT-A, S5:OT                                                                                                                                             |
| 624 | No          | 9       | 9-B  | 1000   | McF_6 | Inf | unif   | wholeT_0.5  | S1:DiP, S1:DiP-A, S1:OT                                                                                                                                                             |
| 625 | No          | 9       | 9-B  | 200    | Bozic | 0   | last   | singleC     | S1:OT, S1:OT-A                                                                                                                                                                      |
| 626 | No          | 9       | 9-B  | 200    | Bozic | 0   | last   | wholeT_0.01 | S1:CBN, S1:CBN-A, S1:OT, S1:OT-A, S5:OT-A                                                                                                                                           |
| 627 | No          | 9       | 9-B  | 200    | Bozic | 0   | last   | wholeT_0.5  | S1:CBN-A, S1:OT, S1:OT-A                                                                                                                                                            |
| 628 | No          | 9       | 9-B  | 200    | Bozic | 0   | unif   | singleC     | J1:OT-A, S1:CBN, S1:CBN-A, S1:OT, S1:OT-A                                                                                                                                           |
| 629 | No          | 9       | 9-B  | 200    | Bozic | 0   | unif   | wholeT_0.01 | S1:CBN, S1:CBN-A                                                                                                                                                                    |
| 630 | No          | 9       | 9-B  | 200    | Bozic | 0   | unif   | wholeT_0.5  | J1:CBN, J1:CBN-A, J1:DiP, J1:DiP-A, J1:OT, J1:OT-A, J5:CBN, J5:CBN-A, J5:DiP, J5:DiP-A, J5:OT, S1:CBN, S1:CBN-A, S1:DiP, S1:DiP-A, S1:OT, S1:OT-A, S5:DiP, S5:DiP-A, S5:OT, S5:OT-A |
| 631 | No          | 9       | 9-B  | 200    | Bozic | Inf | last   | singleC     | S1:OT, S1:OT-A, S5:OT, S5:OT-A                                                                                                                                                      |
| 632 | No          | 9       | 9-B  | 200    | Bozic | Inf | last   | wholeT_0.01 | J1:CBN-A, J1:OT, J1:OT-A, S1:CBN-A, S1:OT, S1:OT-A, S5:OT, S5:OT-A                                                                                                                  |
| 633 | No          | 9       | 9-B  | 200    | Bozic | Inf | last   | wholeT_0.5  | S1:OT, S1:OT-A                                                                                                                                                                      |
| 634 | No          | 9       | 9-B  | 200    | Bozic | Inf | unif   | singleC     | S1:CBN, S1:CBN-A, S1:OT, S1:OT-A                                                                                                                                                    |
| 635 | No          | 9       | 9-B  | 200    | Bozic | Inf | unif   | wholeT_0.01 | J1:CBN, J1:CBN-A, S1:CBN, S1:CBN-A, S1:OT, S1:OT-A, S5:CBN, S5:CBN-A, S5:OT, S5:OT-A                                                                                                |
| 636 | No          | 9       | 9-B  | 200    | Bozic | Inf | unif   | wholeT_0.5  | S1:CBN, S1:CBN-A, S1:OT, S1:OT-A                                                                                                                                                    |
| 637 | No          | 9       | 9-B  | 200    | exp   | 0   | last   | singleC     | S1:OT, S1:OT-A                                                                                                                                                                      |

Table 15: (continued)

|  | Conjunction | Drivers | Tree | S.Size | Model | sh    | S.Time | S.Type | Best method(s) |                                                                                                                                                                                                      |
|--|-------------|---------|------|--------|-------|-------|--------|--------|----------------|------------------------------------------------------------------------------------------------------------------------------------------------------------------------------------------------------|
|  | 638         | No      | 9    | 9-B    | 200   | exp   | 0      | last   | wholeT_0.01    | S1:OT, S1:OT-A                                                                                                                                                                                       |
|  | 639         | No      | 9    | 9-B    | 200   | exp   | 0      | last   | wholeT_0.5     | S1:OT, S1:OT-A                                                                                                                                                                                       |
|  | 640         | No      | 9    | 9-B    | 200   | exp   | 0      | unif   | singleC        | none                                                                                                                                                                                                 |
|  | 641         | No      | 9    | 9-B    | 200   | exp   | 0      | unif   | wholeT_0.01    | S1:CBN, S1:CBN-A, S1:OT, S1:OT-A                                                                                                                                                                     |
|  | 642         | No      | 9    | 9-B    | 200   | exp   | 0      | unif   | wholeT_0.5     | J1:CBN, J1:CBN-A, J1:DiP, J1:DiP-A, J1:OT, J1:OT-A, J5:CBN, J5:CBN-A, J5:DiP, J5:DiP-A, J5:OT, J5:OT-A, S1:CBN, S1:CBN-A, S1:DiP, S1:DiP-A, S1:OT, S1:OT-A, S5:CBN, S5:DiP, S5:DiP-A, S5:OT, S5:OT-A |
|  | 643         | No      | 9    | 9-B    | 200   | exp   | Inf    | last   | singleC        | S1:CBN, S1:OT, S1:OT-A, S5:OT, S5:OT-A                                                                                                                                                               |
|  | 644         | No      | 9    | 9-B    | 200   | exp   | Inf    | last   | wholeT_0.01    | J1:CBN-A, J1:OT, J1:OT-A, S1:CBN, S1:CBN-A, S1:OT, S1:OT-A, S5:CBN-A, S5:OT, S5:OT-A                                                                                                                 |
|  | 645         | No      | 9    | 9-B    | 200   | exp   | Inf    | last   | wholeT_0.5     | S1:CBN, S1:OT, S1:OT-A, S5:OT, S5:OT-A                                                                                                                                                               |
|  | 646         | No      | 9    | 9-B    | 200   | exp   | Inf    | unif   | singleC        | S1:CBN, S1:CBN-A, S1:OT, S1:OT-A                                                                                                                                                                     |
|  | 647         | No      | 9    | 9-B    | 200   | exp   | Inf    | unif   | wholeT_0.01    | S1:CBN, S1:CBN-A, S1:OT, S1:OT-A                                                                                                                                                                     |
|  | 648         | No      | 9    | 9-B    | 200   | exp   | Inf    | unif   | wholeT_0.5     | S1:CBN, S1:CBN-A, S1:OT, S1:OT-A                                                                                                                                                                     |
|  | 649         | No      | 9    | 9-B    | 200   | McF_4 | 0      | last   | singleC        | S1:OT, S1:OT-A                                                                                                                                                                                       |
|  | 650         | No      | 9    | 9-B    | 200   | McF_4 | 0      | last   | wholeT_0.01    | S1:OT, S1:OT-A, S5:OT, S5:OT-A                                                                                                                                                                       |
|  | 651         | No      | 9    | 9-B    | 200   | McF_4 | 0      | last   | wholeT_0.5     | S1:OT, S1:OT-A                                                                                                                                                                                       |
|  | 652         | No      | 9    | 9-B    | 200   | McF_4 | 0      | unif   | singleC        | S1:CBN-A, S1:OT, S1:OT-A                                                                                                                                                                             |
|  | 653         | No      | 9    | 9-B    | 200   | McF_4 | 0      | unif   | wholeT_0.01    | S1:CBN, S1:CBN-A, S1:OT, S1:OT-A                                                                                                                                                                     |
|  | 654         | No      | 9    | 9-B    | 200   | McF_4 | 0      | unif   | wholeT_0.5     | S1:OT, S1:OT-A                                                                                                                                                                                       |
|  | 655         | No      | 9    | 9-B    | 200   | McF_4 | Inf    | last   | singleC        | S1:OT, S1:OT-A                                                                                                                                                                                       |
|  | 656         | No      | 9    | 9-B    | 200   | McF_4 | Inf    | last   | wholeT_0.01    | S1:OT, S1:OT-A, S5:OT, S5:OT-A                                                                                                                                                                       |
|  | 657         | No      | 9    | 9-B    | 200   | McF_4 | Inf    | last   | wholeT_0.5     | S1:OT, S1:OT-A                                                                                                                                                                                       |
|  | 658         | No      | 9    | 9-B    | 200   | McF_4 | Inf    | unif   | singleC        | S1:OT, S1:OT-A                                                                                                                                                                                       |
|  | 659         | No      | 9    | 9-B    | 200   | McF_4 | Inf    | unif   | wholeT_0.01    | S1:OT, S1:OT-A                                                                                                                                                                                       |
|  | 660         | No      | 9    | 9-B    | 200   | McF_4 | Inf    | unif   | wholeT_0.5     | S1:OT, S1:OT-A                                                                                                                                                                                       |
|  | 661         | No      | 9    | 9-B    | 200   | McF_6 | 0      | last   | singleC        | S1:OT-A, S5:OT-A                                                                                                                                                                                     |
|  | 662         | No      | 9    | 9-B    | 200   | McF_6 | 0      | last   | wholeT_0.01    | S1:OT-A, S5:OT-A                                                                                                                                                                                     |
|  | 663         | No      | 9    | 9-B    | 200   | McF_6 | 0      | last   | wholeT_0.5     | S1:OT-A, S5:OT-A                                                                                                                                                                                     |
|  | 664         | No      | 9    | 9-B    | 200   | McF_6 | 0      | unif   | singleC        | S1:OT, S1:OT-A                                                                                                                                                                                       |
|  | 665         | No      | 9    | 9-B    | 200   | McF_6 | 0      | unif   | wholeT_0.01    | S1:OT, S1:OT-A                                                                                                                                                                                       |
|  | 666         | No      | 9    | 9-B    | 200   | McF_6 | 0      | unif   | wholeT_0.5     | S1:OT, S1:OT-A                                                                                                                                                                                       |
|  | 667         | No      | 9    | 9-B    | 200   | McF_6 | Inf    | last   | singleC        | S1:OT-A, S5:OT-A                                                                                                                                                                                     |
|  | 668         | No      | 9    | 9-B    | 200   | McF_6 | Inf    | last   | wholeT_0.01    | S1:OT-A, S5:OT-A                                                                                                                                                                                     |



Table 15: (continued)

|     | Conjunction | Drivers | Tree | S.Size | Model | sh  | S.Time | S.Type      | Best method(s)                                                                                                                                                                                                        |
|-----|-------------|---------|------|--------|-------|-----|--------|-------------|-----------------------------------------------------------------------------------------------------------------------------------------------------------------------------------------------------------------------|
| 669 | No          | 9       | 9-B  | 200    | McF_6 | Inf | last   | wholeT_0.5  | S1:OT-A, S5:OT-A                                                                                                                                                                                                      |
| 670 | No          | 9       | 9-B  | 200    | McF_6 | Inf | unif   | singleC     | S1:OT, S1:OT-A                                                                                                                                                                                                        |
| 671 | No          | 9       | 9-B  | 200    | McF_6 | Inf | unif   | wholeT_0.01 | S1:OT, S1:OT-A                                                                                                                                                                                                        |
| 672 | No          | 9       | 9-B  | 200    | McF_6 | Inf | unif   | wholeT_0.5  | S1:OT, S1:OT-A                                                                                                                                                                                                        |
| 673 | No          | 9       | 9-B  | 100    | Bozic | 0   | last   | singleC     | S1:CBN, S1:CBN-A, S1:OT, S1:OT-A                                                                                                                                                                                      |
| 674 | No          | 9       | 9-B  | 100    | Bozic | 0   | last   | wholeT_0.01 | S1:CBN-A, S1:OT, S1:OT-A                                                                                                                                                                                              |
| 675 | No          | 9       | 9-B  | 100    | Bozic | 0   | last   | wholeT_0.5  | S1:CBN, S1:OT, S1:OT-A                                                                                                                                                                                                |
| 676 | No          | 9       | 9-B  | 100    | Bozic | 0   | unif   | singleC     | S1:CBN, S1:CBN-A, S1:OT, S1:OT-A                                                                                                                                                                                      |
| 677 | No          | 9       | 9-B  | 100    | Bozic | 0   | unif   | wholeT_0.01 | S1:CBN, S1:CBN-A                                                                                                                                                                                                      |
| 678 | No          | 9       | 9-B  | 100    | Bozic | 0   | unif   | wholeT_0.5  | J1:CBN, J1:CBN-A, J1:DiP, J1:DiP-A,<br>J1:OT, J1:OT-A, J5:CBN, J5:CBN-A,<br>J5:DiP-A, J5:OT, S1:CBN, S1:CBN-<br>A, S1:DiP, S1:OT, S1:OT-A, S5:CBN,<br>S5:CBN-A, S5:DiP, S5:OT                                         |
| 679 | No          | 9       | 9-B  | 100    | Bozic | Inf | last   | singleC     | S1:CBN, S1:CBN-A, S1:OT, S1:OT-A,<br>S5:OT-A                                                                                                                                                                          |
| 680 | No          | 9       | 9-B  | 100    | Bozic | Inf | last   | wholeT_0.01 | J1:OT, J1:OT-A, S1:OT, S1:OT-A,<br>S5:OT, S5:OT-A                                                                                                                                                                     |
| 681 | No          | 9       | 9-B  | 100    | Bozic | Inf | last   | wholeT_0.5  | S1:OT, S1:OT-A, S5:OT-A                                                                                                                                                                                               |
| 682 | No          | 9       | 9-B  | 100    | Bozic | Inf | unif   | singleC     | S1:CBN, S1:CBN-A, S1:OT, S1:OT-A                                                                                                                                                                                      |
| 683 | No          | 9       | 9-B  | 100    | Bozic | Inf | unif   | wholeT_0.01 | S1:CBN, S1:CBN-A, S1:OT, S1:OT-A,<br>S5:CBN                                                                                                                                                                           |
| 684 | No          | 9       | 9-B  | 100    | Bozic | Inf | unif   | wholeT_0.5  | S1:CBN, S1:CBN-A, S1:OT, S1:OT-A                                                                                                                                                                                      |
| 685 | No          | 9       | 9-B  | 100    | exp   | 0   | last   | singleC     | S1:OT, S1:OT-A                                                                                                                                                                                                        |
| 686 | No          | 9       | 9-B  | 100    | exp   | 0   | last   | wholeT_0.01 | S1:CBN, S1:CBN-A, S1:OT, S1:OT-A                                                                                                                                                                                      |
| 687 | No          | 9       | 9-B  | 100    | exp   | 0   | last   | wholeT_0.5  | S1:OT, S1:OT-A                                                                                                                                                                                                        |
| 688 | No          | 9       | 9-B  | 100    | exp   | 0   | unif   | singleC     | J1:CBN-A, J1:DiP, J1:OT, J1:OT-A,<br>J5:CBN, J5:CBN-A, J5:DiP, J5:DiP-<br>A, J5:OT, J5:OT-A, S1:CBN, S1:CBN-<br>A, S1:DiP, S1:DiP-A, S1:OT, S1:OT-A,<br>S5:CBN, S5:CBN-A, S5:DiP-A, S5:OT,<br>S5:OT-A                 |
| 689 | No          | 9       | 9-B  | 100    | exp   | 0   | unif   | wholeT_0.01 | S1:CBN, S1:CBN-A, S1:OT, S1:OT-A                                                                                                                                                                                      |
| 690 | No          | 9       | 9-B  | 100    | exp   | 0   | unif   | wholeT_0.5  | J1:CBN, J1:CBN-A, J1:DiP, J1:DiP-A,<br>J1:OT, J1:OT-A, J5:CBN, J5:CBN-A,<br>J5:DiP-A, J5:OT, J5:OT-A, S1:CBN,<br>S1:CBN-A, S1:DiP, S1:DiP-A, S1:OT,<br>S1:OT-A, S5:CBN, S5:CBN-A, S5:DiP,<br>S5:DiP-A, S5:OT, S5:OT-A |
| 691 | No          | 9       | 9-B  | 100    | exp   | Inf | last   | singleC     | S1:OT, S1:OT-A                                                                                                                                                                                                        |

Table 15: (continued)

|     | Conjunction | Drivers | Tree | S.Size | Model | sh  | S.Time | S.Type      | Best method(s)                                                                       |
|-----|-------------|---------|------|--------|-------|-----|--------|-------------|--------------------------------------------------------------------------------------|
| 692 | No          | 9       | 9-B  | 100    | exp   | Inf | last   | wholeT_0.01 | J1:CBN-A, J1:OT, J1:OT-A, S1:CBN, S1:CBN-A, S1:OT, S1:OT-A, S5:CBN-A, S5:OT, S5:OT-A |
| 693 | No          | 9       | 9-B  | 100    | exp   | Inf | last   | wholeT_0.5  | S1:OT, S1:OT-A, S5:OT, S5:OT-A                                                       |
| 694 | No          | 9       | 9-B  | 100    | exp   | Inf | unif   | singleC     | S1:CBN, S1:CBN-A, S1:OT, S1:OT-A                                                     |
| 695 | No          | 9       | 9-B  | 100    | exp   | Inf | unif   | wholeT_0.01 | J1:CBN, J1:CBN-A, S1:CBN, S1:CBN-A, S1:OT, S1:OT-A                                   |
| 696 | No          | 9       | 9-B  | 100    | exp   | Inf | unif   | wholeT_0.5  | S1:CBN, S1:CBN-A, S1:OT, S1:OT-A                                                     |
| 697 | No          | 9       | 9-B  | 100    | McF_4 | 0   | last   | singleC     | S1:OT, S1:OT-A                                                                       |
| 698 | No          | 9       | 9-B  | 100    | McF_4 | 0   | last   | wholeT_0.01 | S1:OT, S1:OT-A, S5:OT, S5:OT-A                                                       |
| 699 | No          | 9       | 9-B  | 100    | McF_4 | 0   | last   | wholeT_0.5  | S1:OT, S1:OT-A                                                                       |
| 700 | No          | 9       | 9-B  | 100    | McF_4 | 0   | unif   | singleC     | S1:CBN-A, S1:OT, S1:OT-A                                                             |
| 701 | No          | 9       | 9-B  | 100    | McF_4 | 0   | unif   | wholeT_0.01 | S1:CBN, S1:CBN-A, S1:OT, S1:OT-A                                                     |
| 702 | No          | 9       | 9-B  | 100    | McF_4 | 0   | unif   | wholeT_0.5  | S1:OT, S1:OT-A                                                                       |
| 703 | No          | 9       | 9-B  | 100    | McF_4 | Inf | last   | singleC     | S1:OT, S1:OT-A                                                                       |
| 704 | No          | 9       | 9-B  | 100    | McF_4 | Inf | last   | wholeT_0.01 | S1:OT, S1:OT-A, S5:OT, S5:OT-A                                                       |
| 705 | No          | 9       | 9-B  | 100    | McF_4 | Inf | last   | wholeT_0.5  | S1:OT, S1:OT-A                                                                       |
| 706 | No          | 9       | 9-B  | 100    | McF_4 | Inf | unif   | singleC     | S1:CBN-A, S1:OT, S1:OT-A                                                             |
| 707 | No          | 9       | 9-B  | 100    | McF_4 | Inf | unif   | wholeT_0.01 | S1:OT, S1:OT-A                                                                       |
| 708 | No          | 9       | 9-B  | 100    | McF_4 | Inf | unif   | wholeT_0.5  | S1:OT, S1:OT-A                                                                       |
| 709 | No          | 9       | 9-B  | 100    | McF_6 | 0   | last   | singleC     | S1:OT-A, S5:OT-A                                                                     |
| 710 | No          | 9       | 9-B  | 100    | McF_6 | 0   | last   | wholeT_0.01 | S1:OT-A, S5:OT-A                                                                     |
| 711 | No          | 9       | 9-B  | 100    | McF_6 | 0   | last   | wholeT_0.5  | S1:OT-A, S5:OT-A                                                                     |
| 712 | No          | 9       | 9-B  | 100    | McF_6 | 0   | unif   | singleC     | S1:OT, S1:OT-A                                                                       |
| 713 | No          | 9       | 9-B  | 100    | McF_6 | 0   | unif   | wholeT_0.01 | S1:OT, S1:OT-A                                                                       |
| 714 | No          | 9       | 9-B  | 100    | McF_6 | 0   | unif   | wholeT_0.5  | S1:OT, S1:OT-A                                                                       |
| 715 | No          | 9       | 9-B  | 100    | McF_6 | Inf | last   | singleC     | S1:OT-A, S5:OT-A                                                                     |
| 716 | No          | 9       | 9-B  | 100    | McF_6 | Inf | last   | wholeT_0.01 | S1:OT-A, S5:OT-A                                                                     |
| 717 | No          | 9       | 9-B  | 100    | McF_6 | Inf | last   | wholeT_0.5  | S1:OT-A, S5:OT-A                                                                     |
| 718 | No          | 9       | 9-B  | 100    | McF_6 | Inf | unif   | singleC     | S1:OT, S1:OT-A                                                                       |
| 719 | No          | 9       | 9-B  | 100    | McF_6 | Inf | unif   | wholeT_0.01 | S1:OT, S1:OT-A                                                                       |
| 720 | No          | 9       | 9-B  | 100    | McF_6 | Inf | unif   | wholeT_0.5  | S1:OT, S1:OT-A                                                                       |
| 721 | No          | 7       | 7-B  | 1000   | Bozic | 0   | last   | singleC     | S1:OT-A, S5:OT-A                                                                     |
| 722 | No          | 7       | 7-B  | 1000   | Bozic | 0   | last   | wholeT_0.01 | J1:DiP-A, J1:OT-A, J5:DiP-A, J5:OT-A, S1:DiP-A, S1:OT-A, S5:OT-A                     |
| 723 | No          | 7       | 7-B  | 1000   | Bozic | 0   | last   | wholeT_0.5  | S1:OT-A                                                                              |
| 724 | No          | 7       | 7-B  | 1000   | Bozic | 0   | unif   | singleC     | S1:OT                                                                                |
| 725 | No          | 7       | 7-B  | 1000   | Bozic | 0   | unif   | wholeT_0.01 | S1:CBN, S1:CBN-A, S1:DiP-A, S1:OT, S1:OT-A                                           |

Table 15: (continued)

|     | Conjunction | Drivers | Tree | S.Size | Model | sh  | S.Time | S.Type      | Best method(s)                                                                                                                                 |
|-----|-------------|---------|------|--------|-------|-----|--------|-------------|------------------------------------------------------------------------------------------------------------------------------------------------|
| 726 | No          | 7       | 7-B  | 1000   | Bozic | 0   | unif   | wholeT_0.5  | J1:CBN-A, J1:DiP-A, J1:OT-A, J5:CBN, J5:CBN-A, J5:DiP-A, J5:OT, J5:OT-A, S1:CBN, S1:CBN-A, S1:DiP-A, S1:OT, S1:OT-A, S5:CBN, S5:CBN-A, S5:OT-A |
| 727 | No          | 7       | 7-B  | 1000   | Bozic | Inf | last   | singleC     | S1:DiP-A, S1:OT-A                                                                                                                              |
| 728 | No          | 7       | 7-B  | 1000   | Bozic | Inf | last   | wholeT_0.01 | J1:DiP-A, J1:OT-A, S1:DiP-A, S1:OT-A, S5:DiP-A, S5:OT-A                                                                                        |
| 729 | No          | 7       | 7-B  | 1000   | Bozic | Inf | last   | wholeT_0.5  | S1:DiP-A, S1:OT-A                                                                                                                              |
| 730 | No          | 7       | 7-B  | 1000   | Bozic | Inf | unif   | singleC     | S1:CBN, S1:CBN-A, S1:OT, S1:OT-A                                                                                                               |
| 731 | No          | 7       | 7-B  | 1000   | Bozic | Inf | unif   | wholeT_0.01 | J1:CBN-A, J1:OT-A, S1:CBN, S1:CBN-A, S1:OT, S1:OT-A                                                                                            |
| 732 | No          | 7       | 7-B  | 1000   | Bozic | Inf | unif   | wholeT_0.5  | S1:CBN, S1:CBN-A, S1:OT, S1:OT-A                                                                                                               |
| 733 | No          | 7       | 7-B  | 1000   | exp   | 0   | last   | singleC     | S1:OT-A                                                                                                                                        |
| 734 | No          | 7       | 7-B  | 1000   | exp   | 0   | last   | wholeT_0.01 | J1:OT-A, S1:OT-A, S5:OT-A                                                                                                                      |
| 735 | No          | 7       | 7-B  | 1000   | exp   | 0   | last   | wholeT_0.5  | S1:CBN-A, S1:OT-A                                                                                                                              |
| 736 | No          | 7       | 7-B  | 1000   | exp   | 0   | unif   | singleC     | none                                                                                                                                           |
| 737 | No          | 7       | 7-B  | 1000   | exp   | 0   | unif   | wholeT_0.01 | S1:CBN-A, S1:OT, S1:OT-A                                                                                                                       |
| 738 | No          | 7       | 7-B  | 1000   | exp   | 0   | unif   | wholeT_0.5  | none                                                                                                                                           |
| 739 | No          | 7       | 7-B  | 1000   | exp   | Inf | last   | singleC     | S1:OT-A                                                                                                                                        |
| 740 | No          | 7       | 7-B  | 1000   | exp   | Inf | last   | wholeT_0.01 | S1:OT-A, S5:OT-A                                                                                                                               |
| 741 | No          | 7       | 7-B  | 1000   | exp   | Inf | last   | wholeT_0.5  | S1:OT-A, S5:OT-A                                                                                                                               |
| 742 | No          | 7       | 7-B  | 1000   | exp   | Inf | unif   | singleC     | S1:CBN, S1:OT, S1:OT-A                                                                                                                         |
| 743 | No          | 7       | 7-B  | 1000   | exp   | Inf | unif   | wholeT_0.01 | J1:CBN, J1:CBN-A, J1:OT, J1:OT-A, J5:CBN, J5:CBN-A, J5:OT, J5:OT-A, S1:CBN, S1:CBN-A, S1:OT, S1:OT-A, S5:CBN, S5:CBN-A, S5:OT, S5:OT-A         |
| 744 | No          | 7       | 7-B  | 1000   | exp   | Inf | unif   | wholeT_0.5  | S1:OT                                                                                                                                          |
| 745 | No          | 7       | 7-B  | 1000   | McF_4 | 0   | last   | singleC     | S1:DiP-A, S1:OT-A, S5:DiP-A, S5:OT-A                                                                                                           |
| 746 | No          | 7       | 7-B  | 1000   | McF_4 | 0   | last   | wholeT_0.01 | S1:DiP-A, S1:OT-A, S5:DiP-A, S5:OT-A                                                                                                           |
| 747 | No          | 7       | 7-B  | 1000   | McF_4 | 0   | last   | wholeT_0.5  | S1:DiP-A, S1:OT-A, S5:DiP-A, S5:OT-A                                                                                                           |
| 748 | No          | 7       | 7-B  | 1000   | McF_4 | 0   | unif   | singleC     | S1:DiP-A, S1:OT, S1:OT-A                                                                                                                       |
| 749 | No          | 7       | 7-B  | 1000   | McF_4 | 0   | unif   | wholeT_0.01 | S1:DiP-A, S1:OT, S1:OT-A                                                                                                                       |
| 750 | No          | 7       | 7-B  | 1000   | McF_4 | 0   | unif   | wholeT_0.5  | S1:DiP-A, S1:OT, S1:OT-A                                                                                                                       |
| 751 | No          | 7       | 7-B  | 1000   | McF_4 | Inf | last   | singleC     | S1:DiP-A, S1:OT-A, S5:DiP-A, S5:OT-A                                                                                                           |
| 752 | No          | 7       | 7-B  | 1000   | McF_4 | Inf | last   | wholeT_0.01 | S1:DiP-A, S1:OT-A, S5:DiP-A, S5:OT-A                                                                                                           |
| 753 | No          | 7       | 7-B  | 1000   | McF_4 | Inf | last   | wholeT_0.5  | S1:DiP-A, S1:OT-A, S5:DiP-A, S5:OT-A                                                                                                           |
| 754 | No          | 7       | 7-B  | 1000   | McF_4 | Inf | unif   | singleC     | S1:OT, S1:OT-A                                                                                                                                 |
| 755 | No          | 7       | 7-B  | 1000   | McF_4 | Inf | unif   | wholeT_0.01 | S1:OT, S1:OT-A                                                                                                                                 |
| 756 | No          | 7       | 7-B  | 1000   | McF_4 | Inf | unif   | wholeT_0.5  | S1:OT, S1:OT-A                                                                                                                                 |

Table 15: (continued)

|     | Conjunction | Drivers | Tree | S.Size | Model | sh  | S.Time | S.Type      | Best method(s)                                                                        |
|-----|-------------|---------|------|--------|-------|-----|--------|-------------|---------------------------------------------------------------------------------------|
| 757 | No          | 7       | 7-B  | 1000   | McF_6 | 0   | last   | singleC     | J1:DiP-A, J1:OT-A, S1:DiP-A, S1:OT-A, S5:DiP-A, S5:OT-A                               |
| 758 | No          | 7       | 7-B  | 1000   | McF_6 | 0   | last   | wholeT_0.01 | J1:DiP-A, J1:OT-A, J5:DiP-A, J5:OT-A, S1:DiP-A, S1:OT-A, S5:DiP-A, S5:OT-A            |
| 759 | No          | 7       | 7-B  | 1000   | McF_6 | 0   | last   | wholeT_0.5  | J1:DiP-A, J1:OT-A, S1:DiP-A, S1:OT-A, S5:DiP-A, S5:OT-A                               |
| 760 | No          | 7       | 7-B  | 1000   | McF_6 | 0   | unif   | singleC     | S1:DiP, S1:DiP-A, S1:OT, S1:OT-A, S5:DiP, S5:DiP-A, S5:OT, S5:OT-A                    |
| 761 | No          | 7       | 7-B  | 1000   | McF_6 | 0   | unif   | wholeT_0.01 | S1:DiP, S1:DiP-A, S1:OT, S1:OT-A, S5:DiP, S5:DiP-A, S5:OT, S5:OT-A                    |
| 762 | No          | 7       | 7-B  | 1000   | McF_6 | 0   | unif   | wholeT_0.5  | S1:DiP, S1:DiP-A, S1:OT, S1:OT-A, S5:DiP, S5:DiP-A, S5:OT, S5:OT-A                    |
| 763 | No          | 7       | 7-B  | 1000   | McF_6 | Inf | last   | singleC     | J1:DiP-A, J1:OT-A, S1:DiP-A, S1:OT-A, S5:DiP-A, S5:OT-A                               |
| 764 | No          | 7       | 7-B  | 1000   | McF_6 | Inf | last   | wholeT_0.01 | J1:DiP-A, J1:OT-A, J5:DiP-A, J5:OT-A, S1:DiP-A, S1:OT-A, S5:DiP-A, S5:OT-A            |
| 765 | No          | 7       | 7-B  | 1000   | McF_6 | Inf | last   | wholeT_0.5  | J1:DiP-A, J1:OT-A, S1:DiP-A, S1:OT-A, S5:DiP-A, S5:OT-A                               |
| 766 | No          | 7       | 7-B  | 1000   | McF_6 | Inf | unif   | singleC     | S1:DiP-A, S1:OT, S1:OT-A, S5:DiP-A, S5:OT, S5:OT-A                                    |
| 767 | No          | 7       | 7-B  | 1000   | McF_6 | Inf | unif   | wholeT_0.01 | S1:DiP-A, S1:OT, S1:OT-A, S5:DiP-A, S5:OT, S5:OT-A                                    |
| 768 | No          | 7       | 7-B  | 1000   | McF_6 | Inf | unif   | wholeT_0.5  | S1:DiP-A, S1:OT, S1:OT-A, S5:DiP-A, S5:OT, S5:OT-A                                    |
| 769 | No          | 7       | 7-B  | 200    | Bozic | 0   | last   | singleC     | S1:OT-A, S5:OT-A                                                                      |
| 770 | No          | 7       | 7-B  | 200    | Bozic | 0   | last   | wholeT_0.01 | S1:OT-A                                                                               |
| 771 | No          | 7       | 7-B  | 200    | Bozic | 0   | last   | wholeT_0.5  | S1:OT-A                                                                               |
| 772 | No          | 7       | 7-B  | 200    | Bozic | 0   | unif   | singleC     | S1:CBN, S1:CBN-A, S1:OT, S1:OT-A                                                      |
| 773 | No          | 7       | 7-B  | 200    | Bozic | 0   | unif   | wholeT_0.01 | J1:CBN-A, J1:OT, J1:OT-A, S1:CBN, S1:CBN-A, S1:OT, S1:OT-A, S5:CBN, S5:CBN-A, S5:OT-A |
| 774 | No          | 7       | 7-B  | 200    | Bozic | 0   | unif   | wholeT_0.5  | S1:CBN, S1:CBN-A, S1:OT, S1:OT-A                                                      |
| 775 | No          | 7       | 7-B  | 200    | Bozic | Inf | last   | singleC     | S1:OT-A                                                                               |
| 776 | No          | 7       | 7-B  | 200    | Bozic | Inf | last   | wholeT_0.01 | J1:OT-A, S1:OT-A, S5:OT-A                                                             |
| 777 | No          | 7       | 7-B  | 200    | Bozic | Inf | last   | wholeT_0.5  | S1:OT-A                                                                               |
| 778 | No          | 7       | 7-B  | 200    | Bozic | Inf | unif   | singleC     | S1:OT, S1:OT-A                                                                        |
| 779 | No          | 7       | 7-B  | 200    | Bozic | Inf | unif   | wholeT_0.01 | S1:CBN, S1:CBN-A, S1:OT, S1:OT-A                                                      |
| 780 | No          | 7       | 7-B  | 200    | Bozic | Inf | unif   | wholeT_0.5  | S1:CBN, S1:OT, S1:OT-A                                                                |
| 781 | No          | 7       | 7-B  | 200    | exp   | 0   | last   | singleC     | S1:OT-A                                                                               |
| 782 | No          | 7       | 7-B  | 200    | exp   | 0   | last   | wholeT_0.01 | S1:OT-A, S5:OT-A                                                                      |

Table 15: (continued)

|     | Conjunction | Drivers | Tree | S.Size | Model | sh  | S.Time | S.Type      | Best method(s)                                                                                                                                                                               |
|-----|-------------|---------|------|--------|-------|-----|--------|-------------|----------------------------------------------------------------------------------------------------------------------------------------------------------------------------------------------|
| 783 | No          | 7       | 7-B  | 200    | exp   | 0   | last   | wholeT_0.5  | S1:CBN-A, S1:OT-A                                                                                                                                                                            |
| 784 | No          | 7       | 7-B  | 200    | exp   | 0   | unif   | singleC     | J1:CBN, J1:CBN-A, J1:OT, J1:OT-A, S1:CBN, S1:CBN-A, S1:OT, S1:OT-A                                                                                                                           |
| 785 | No          | 7       | 7-B  | 200    | exp   | 0   | unif   | wholeT_0.01 | S1:CBN, S1:CBN-A, S1:OT, S1:OT-A                                                                                                                                                             |
| 786 | No          | 7       | 7-B  | 200    | exp   | 0   | unif   | wholeT_0.5  | J1:CBN, J1:CBN-A, J1:DiP-A, J1:OT, J1:OT-A, J5:CBN, J5:CBN-A, J5:DiP, J5:OT, J5:OT-A, S1:CBN, S1:CBN-A, S1:DiP, S1:DiP-A, S1:OT, S1:OT-A, S5:CBN, S5:CBN-A, S5:DiP, S5:DiP-A, S5:OT, S5:OT-A |
| 787 | No          | 7       | 7-B  | 200    | exp   | Inf | last   | singleC     | S1:OT-A                                                                                                                                                                                      |
| 788 | No          | 7       | 7-B  | 200    | exp   | Inf | last   | wholeT_0.01 | S1:OT-A, S5:OT-A                                                                                                                                                                             |
| 789 | No          | 7       | 7-B  | 200    | exp   | Inf | last   | wholeT_0.5  | S1:OT-A, S5:OT-A                                                                                                                                                                             |
| 790 | No          | 7       | 7-B  | 200    | exp   | Inf | unif   | singleC     | S1:CBN, S1:CBN-A, S1:OT, S1:OT-A                                                                                                                                                             |
| 791 | No          | 7       | 7-B  | 200    | exp   | Inf | unif   | wholeT_0.01 | J1:OT, J1:OT-A, S1:CBN, S1:CBN-A, S1:OT, S1:OT-A                                                                                                                                             |
| 792 | No          | 7       | 7-B  | 200    | exp   | Inf | unif   | wholeT_0.5  | S1:OT, S1:OT-A                                                                                                                                                                               |
| 793 | No          | 7       | 7-B  | 200    | McF_4 | 0   | last   | singleC     | S1:OT-A, S5:OT-A                                                                                                                                                                             |
| 794 | No          | 7       | 7-B  | 200    | McF_4 | 0   | last   | wholeT_0.01 | S1:OT-A, S5:OT-A                                                                                                                                                                             |
| 795 | No          | 7       | 7-B  | 200    | McF_4 | 0   | last   | wholeT_0.5  | S1:OT-A, S5:OT-A                                                                                                                                                                             |
| 796 | No          | 7       | 7-B  | 200    | McF_4 | 0   | unif   | singleC     | S1:OT, S1:OT-A                                                                                                                                                                               |
| 797 | No          | 7       | 7-B  | 200    | McF_4 | 0   | unif   | wholeT_0.01 | S1:OT, S1:OT-A                                                                                                                                                                               |
| 798 | No          | 7       | 7-B  | 200    | McF_4 | 0   | unif   | wholeT_0.5  | S1:OT, S1:OT-A                                                                                                                                                                               |
| 799 | No          | 7       | 7-B  | 200    | McF_4 | Inf | last   | singleC     | S1:OT-A, S5:OT-A                                                                                                                                                                             |
| 800 | No          | 7       | 7-B  | 200    | McF_4 | Inf | last   | wholeT_0.01 | S1:OT-A, S5:OT-A                                                                                                                                                                             |
| 801 | No          | 7       | 7-B  | 200    | McF_4 | Inf | last   | wholeT_0.5  | S1:OT-A, S5:OT-A                                                                                                                                                                             |
| 802 | No          | 7       | 7-B  | 200    | McF_4 | Inf | unif   | singleC     | S1:OT, S1:OT-A                                                                                                                                                                               |
| 803 | No          | 7       | 7-B  | 200    | McF_4 | Inf | unif   | wholeT_0.01 | S1:OT, S1:OT-A                                                                                                                                                                               |
| 804 | No          | 7       | 7-B  | 200    | McF_4 | Inf | unif   | wholeT_0.5  | S1:OT, S1:OT-A                                                                                                                                                                               |
| 805 | No          | 7       | 7-B  | 200    | McF_6 | 0   | last   | singleC     | J1:OT-A, J5:OT-A, S1:OT-A, S5:OT-A                                                                                                                                                           |
| 806 | No          | 7       | 7-B  | 200    | McF_6 | 0   | last   | wholeT_0.01 | J1:DiP-A, J1:OT-A, J5:DiP-A, J5:OT-A, S1:DiP-A, S1:OT-A, S5:DiP-A, S5:OT-A                                                                                                                   |
| 807 | No          | 7       | 7-B  | 200    | McF_6 | 0   | last   | wholeT_0.5  | J1:OT-A, S1:OT-A, S5:OT-A                                                                                                                                                                    |
| 808 | No          | 7       | 7-B  | 200    | McF_6 | 0   | unif   | singleC     | S1:OT, S1:OT-A, S5:OT, S5:OT-A                                                                                                                                                               |
| 809 | No          | 7       | 7-B  | 200    | McF_6 | 0   | unif   | wholeT_0.01 | J1:OT-A, S1:OT, S1:OT-A, S5:OT, S5:OT-A                                                                                                                                                      |
| 810 | No          | 7       | 7-B  | 200    | McF_6 | 0   | unif   | wholeT_0.5  | S1:OT, S1:OT-A, S5:OT, S5:OT-A                                                                                                                                                               |
| 811 | No          | 7       | 7-B  | 200    | McF_6 | Inf | last   | singleC     | J1:OT-A, J5:OT-A, S1:OT-A, S5:OT-A                                                                                                                                                           |
| 812 | No          | 7       | 7-B  | 200    | McF_6 | Inf | last   | wholeT_0.01 | J1:OT-A, J5:OT-A, S1:OT-A, S5:OT-A                                                                                                                                                           |
| 813 | No          | 7       | 7-B  | 200    | McF_6 | Inf | last   | wholeT_0.5  | J1:OT-A, S1:OT-A, S5:OT-A                                                                                                                                                                    |

Table 15: (continued)

|     | Conjunction | Drivers | Tree | S.Size | Model | sh  | S.Time | S.Type      | Best method(s)                                                     |
|-----|-------------|---------|------|--------|-------|-----|--------|-------------|--------------------------------------------------------------------|
| 814 | No          | 7       | 7-B  | 200    | McF_6 | Inf | unif   | singleC     | S1:OT, S1:OT-A, S5:OT, S5:OT-A                                     |
| 815 | No          | 7       | 7-B  | 200    | McF_6 | Inf | unif   | wholeT_0.01 | S1:OT, S1:OT-A, S5:OT, S5:OT-A                                     |
| 816 | No          | 7       | 7-B  | 200    | McF_6 | Inf | unif   | wholeT_0.5  | J1:OT-A, S1:OT, S1:OT-A, S5:OT, S5:OT-A                            |
| 817 | No          | 7       | 7-B  | 100    | Bozic | 0   | last   | singleC     | S1:OT-A                                                            |
| 818 | No          | 7       | 7-B  | 100    | Bozic | 0   | last   | wholeT_0.01 | S1:OT-A                                                            |
| 819 | No          | 7       | 7-B  | 100    | Bozic | 0   | last   | wholeT_0.5  | S1:OT-A                                                            |
| 820 | No          | 7       | 7-B  | 100    | Bozic | 0   | unif   | singleC     | S1:CBN, S1:CBN-A, S1:OT, S1:OT-A                                   |
| 821 | No          | 7       | 7-B  | 100    | Bozic | 0   | unif   | wholeT_0.01 | S1:CBN, S1:CBN-A, S1:OT, S1:OT-A                                   |
| 822 | No          | 7       | 7-B  | 100    | Bozic | 0   | unif   | wholeT_0.5  | S1:CBN, S1:CBN-A, S1:OT, S1:OT-A                                   |
| 823 | No          | 7       | 7-B  | 100    | Bozic | Inf | last   | singleC     | S1:OT-A                                                            |
| 824 | No          | 7       | 7-B  | 100    | Bozic | Inf | last   | wholeT_0.01 | S1:CBN-A, S1:OT-A, S5:OT-A                                         |
| 825 | No          | 7       | 7-B  | 100    | Bozic | Inf | last   | wholeT_0.5  | S1:OT-A                                                            |
| 826 | No          | 7       | 7-B  | 100    | Bozic | Inf | unif   | singleC     | S1:CBN-A, S1:OT, S1:OT-A                                           |
| 827 | No          | 7       | 7-B  | 100    | Bozic | Inf | unif   | wholeT_0.01 | J1:CBN, J1:CBN-A, J1:OT, J1:OT-A, S1:CBN, S1:CBN-A, S1:OT, S1:OT-A |
| 828 | No          | 7       | 7-B  | 100    | Bozic | Inf | unif   | wholeT_0.5  | S1:OT, S1:OT-A                                                     |
| 829 | No          | 7       | 7-B  | 100    | exp   | 0   | last   | singleC     | S1:OT-A                                                            |
| 830 | No          | 7       | 7-B  | 100    | exp   | 0   | last   | wholeT_0.01 | S1:OT-A, S5:OT-A                                                   |
| 831 | No          | 7       | 7-B  | 100    | exp   | 0   | last   | wholeT_0.5  | S1:OT-A                                                            |
| 832 | No          | 7       | 7-B  | 100    | exp   | 0   | unif   | singleC     | J1:CBN-A, J1:OT, J1:OT-A, S1:CBN, S1:CBN-A, S1:OT, S1:OT-A         |
| 833 | No          | 7       | 7-B  | 100    | exp   | 0   | unif   | wholeT_0.01 | S1:CBN, S1:CBN-A, S1:OT, S1:OT-A                                   |
| 834 | No          | 7       | 7-B  | 100    | exp   | 0   | unif   | wholeT_0.5  | J1:CBN-A, J1:OT, J1:OT-A, S1:CBN, S1:CBN-A, S1:OT, S1:OT-A         |
| 835 | No          | 7       | 7-B  | 100    | exp   | Inf | last   | singleC     | S1:OT-A                                                            |
| 836 | No          | 7       | 7-B  | 100    | exp   | Inf | last   | wholeT_0.01 | S1:OT-A, S5:OT-A                                                   |
| 837 | No          | 7       | 7-B  | 100    | exp   | Inf | last   | wholeT_0.5  | S1:OT-A                                                            |
| 838 | No          | 7       | 7-B  | 100    | exp   | Inf | unif   | singleC     | S1:OT, S1:OT-A                                                     |
| 839 | No          | 7       | 7-B  | 100    | exp   | Inf | unif   | wholeT_0.01 | S1:CBN, S1:CBN-A, S1:OT, S1:OT-A                                   |
| 840 | No          | 7       | 7-B  | 100    | exp   | Inf | unif   | wholeT_0.5  | S1:CBN, S1:CBN-A, S1:OT, S1:OT-A                                   |
| 841 | No          | 7       | 7-B  | 100    | McF_4 | 0   | last   | singleC     | S1:OT-A                                                            |
| 842 | No          | 7       | 7-B  | 100    | McF_4 | 0   | last   | wholeT_0.01 | S1:OT-A, S5:OT-A                                                   |
| 843 | No          | 7       | 7-B  | 100    | McF_4 | 0   | last   | wholeT_0.5  | S1:OT-A                                                            |
| 844 | No          | 7       | 7-B  | 100    | McF_4 | 0   | unif   | singleC     | S1:OT, S1:OT-A                                                     |
| 845 | No          | 7       | 7-B  | 100    | McF_4 | 0   | unif   | wholeT_0.01 | S1:OT, S1:OT-A                                                     |
| 846 | No          | 7       | 7-B  | 100    | McF_4 | 0   | unif   | wholeT_0.5  | S1:OT, S1:OT-A                                                     |
| 847 | No          | 7       | 7-B  | 100    | McF_4 | Inf | last   | singleC     | S1:OT-A, S5:OT-A                                                   |
| 848 | No          | 7       | 7-B  | 100    | McF_4 | Inf | last   | wholeT_0.01 | S1:OT-A, S5:OT-A                                                   |
| 849 | No          | 7       | 7-B  | 100    | McF_4 | Inf | last   | wholeT_0.5  | S1:OT-A, S5:OT-A                                                   |

Table 15: (continued)

|     | Conjunction | Drivers | Tree | S.Size | Model | sh  | S.Time | S.Type      | Best method(s)                             |
|-----|-------------|---------|------|--------|-------|-----|--------|-------------|--------------------------------------------|
| 850 | No          | 7       | 7-B  | 100    | McF_4 | Inf | unif   | singleC     | S1:OT, S1:OT-A                             |
| 851 | No          | 7       | 7-B  | 100    | McF_4 | Inf | unif   | wholeT_0.01 | S1:OT, S1:OT-A                             |
| 852 | No          | 7       | 7-B  | 100    | McF_4 | Inf | unif   | wholeT_0.5  | S1:OT, S1:OT-A                             |
| 853 | No          | 7       | 7-B  | 100    | McF_6 | 0   | last   | singleC     | J1:OT-A, S1:OT-A, S5:OT-A                  |
| 854 | No          | 7       | 7-B  | 100    | McF_6 | 0   | last   | wholeT_0.01 | J1:OT-A, J5:OT-A, S1:OT-A, S5:OT-A         |
| 855 | No          | 7       | 7-B  | 100    | McF_6 | 0   | last   | wholeT_0.5  | J1:OT-A, S1:OT-A, S5:OT-A                  |
| 856 | No          | 7       | 7-B  | 100    | McF_6 | 0   | unif   | singleC     | J1:OT-A, S1:OT, S1:OT-A, S5:OT,<br>S5:OT-A |
| 857 | No          | 7       | 7-B  | 100    | McF_6 | 0   | unif   | wholeT_0.01 | S1:OT-A, S5:OT, S5:OT-A                    |
| 858 | No          | 7       | 7-B  | 100    | McF_6 | 0   | unif   | wholeT_0.5  | S1:OT, S1:OT-A, S5:OT, S5:OT-A             |
| 859 | No          | 7       | 7-B  | 100    | McF_6 | Inf | last   | singleC     | J1:OT-A, S1:OT-A, S5:OT-A                  |
| 860 | No          | 7       | 7-B  | 100    | McF_6 | Inf | last   | wholeT_0.01 | J1:OT-A, J5:OT-A, S1:OT-A, S5:OT-A         |
| 861 | No          | 7       | 7-B  | 100    | McF_6 | Inf | last   | wholeT_0.5  | J1:OT-A, S1:OT-A                           |
| 862 | No          | 7       | 7-B  | 100    | McF_6 | Inf | unif   | singleC     | S1:OT, S1:OT-A, S5:OT, S5:OT-A             |
| 863 | No          | 7       | 7-B  | 100    | McF_6 | Inf | unif   | wholeT_0.01 | J1:OT-A, S1:OT-A, S5:OT, S5:OT-A           |
| 864 | No          | 7       | 7-B  | 100    | McF_6 | Inf | unif   | wholeT_0.5  | S1:OT, S1:OT-A, S5:OT, S5:OT-A             |

## 5.4 Confidence sets (MCB), FPF, Drivers Unknown

Table 16: Confidence sets (method MCB) when Drivers are Unknown for measure FPF.

|    | Conjunction | Drivers | Tree | S.Size | Model | sh  | S.Time | S.Type      | Best method(s)                                                                                                                                                     |
|----|-------------|---------|------|--------|-------|-----|--------|-------------|--------------------------------------------------------------------------------------------------------------------------------------------------------------------|
| 1  | Yes         | 11      | 11-A | 1000   | Bozic | 0   | last   | singleC     | J1:DiP, J1:DiP-A, J1:OT-A, J5:DiP, J5:DiP-A, J5:OT, J5:OT-A, S1:OT, S1:OT-A, S5:OT, S5:OT-A                                                                        |
| 2  | Yes         | 11      | 11-A | 1000   | Bozic | 0   | last   | wholeT_0.01 | J1:DiP, J1:DiP-A, J5:DiP, J5:DiP-A, S1:DiP, S1:DiP-A, S5:DiP, S5:DiP-A                                                                                             |
| 3  | Yes         | 11      | 11-A | 1000   | Bozic | 0   | last   | wholeT_0.5  | J1:DiP, J1:DiP-A, J1:OT, J1:OT-A, J5:DiP, J5:DiP-A, J5:OT, J5:OT-A, S1:OT, S1:OT-A, S5:DiP, S5:DiP-A, S5:OT, S5:OT-A                                               |
| 4  | Yes         | 11      | 11-A | 1000   | Bozic | 0   | unif   | singleC     | J1:DiP, J1:DiP-A, J1:OT, J1:OT-A, J5:CBN, J5:CBN-A, J5:DiP, J5:DiP-A, J5:OT, J5:OT-A, S1:DiP, S1:DiP-A, S1:OT, S1:OT-A, S5:DiP, S5:DiP-A, S5:OT, S5:OT-A           |
| 5  | Yes         | 11      | 11-A | 1000   | Bozic | 0   | unif   | wholeT_0.01 | J5:DiP, J5:DiP-A, J5:OT, J5:OT-A                                                                                                                                   |
| 6  | Yes         | 11      | 11-A | 1000   | Bozic | 0   | unif   | wholeT_0.5  | J1:CBN, J1:CBN-A, J1:DiP, J1:DiP-A, J1:OT, J1:OT-A, J5:CBN, J5:CBN-A, J5:DiP, J5:DiP-A, J5:OT, J5:OT-A, S1:DiP-A, S1:OT, S1:OT-A, S5:DiP, S5:DiP-A, S5:OT, S5:OT-A |
| 7  | Yes         | 11      | 11-A | 1000   | Bozic | Inf | last   | singleC     | J1:DiP, J1:DiP-A, J1:OT, J1:OT-A, J5:DiP, J5:DiP-A, J5:OT, J5:OT-A, S1:DiP-A, S5:DiP, S5:DiP-A, S5:OT, S5:OT-A                                                     |
| 8  | Yes         | 11      | 11-A | 1000   | Bozic | Inf | last   | wholeT_0.01 | J5:DiP, J5:DiP-A, J5:OT, J5:OT-A                                                                                                                                   |
| 9  | Yes         | 11      | 11-A | 1000   | Bozic | Inf | last   | wholeT_0.5  | J1:DiP, J1:DiP-A, J1:OT, J1:OT-A, J5:DiP, J5:DiP-A, J5:OT, J5:OT-A, S5:DiP, S5:DiP-A, S5:OT, S5:OT-A                                                               |
| 10 | Yes         | 11      | 11-A | 1000   | Bozic | Inf | unif   | singleC     | J1:DiP, J1:DiP-A, J1:OT, J1:OT-A, J5:DiP, J5:DiP-A, J5:OT, J5:OT-A, S5:DiP, S5:DiP-A, S5:OT, S5:OT-A                                                               |
| 11 | Yes         | 11      | 11-A | 1000   | Bozic | Inf | unif   | wholeT_0.01 | J5:DiP, J5:DiP-A, J5:OT, J5:OT-A                                                                                                                                   |
| 12 | Yes         | 11      | 11-A | 1000   | Bozic | Inf | unif   | wholeT_0.5  | J1:DiP, J1:DiP-A, J1:OT, J1:OT-A, J5:DiP, J5:DiP-A, J5:OT, J5:OT-A, S5:DiP, S5:DiP-A, S5:OT, S5:OT-A                                                               |



Table 16: (continued)

|    | Conjunction | Drivers | Tree | S.Size | Model | sh  | S.Time | S.Type      | Best method(s)                                                                                                                                                             |
|----|-------------|---------|------|--------|-------|-----|--------|-------------|----------------------------------------------------------------------------------------------------------------------------------------------------------------------------|
| 13 | Yes         | 11      | 11-A | 1000   | exp   | 0   | last   | singleC     | J1:DiP, J1:DiP-A, J1:OT, J1:OT-A, J5:CBN, J5:CBN-A, J5:DiP, J5:DiP-A, J5:OT, J5:OT-A, S1:DiP, S1:DiP-A, S1:OT, S1:OT-A, S5:DiP, S5:DiP-A, S5:OT, S5:OT-A                   |
| 14 | Yes         | 11      | 11-A | 1000   | exp   | 0   | last   | wholeT_0.01 | J1:DiP, J1:DiP-A, J1:OT, J1:OT-A, J5:DiP, J5:DiP-A, J5:OT, J5:OT-A, S1:OT                                                                                                  |
| 15 | Yes         | 11      | 11-A | 1000   | exp   | 0   | last   | wholeT_0.5  | J1:OT, J1:OT-A, J5:CBN, J5:CBN-A, J5:DiP-A, J5:OT, J5:OT-A, S1:DiP-A, S1:OT, S1:OT-A, S5:DiP, S5:DiP-A, S5:OT, S5:OT-A                                                     |
| 16 | Yes         | 11      | 11-A | 1000   | exp   | 0   | unif   | singleC     | J1:CBN, J1:CBN-A, J1:DiP, J1:DiP-A, J1:OT, J1:OT-A, J5:CBN, J5:CBN-A, J5:DiP, J5:DiP-A, J5:OT, J5:OT-A, S1:DiP, S1:DiP-A, S1:OT, S1:OT-A, S5:DiP, S5:DiP-A, S5:OT, S5:OT-A |
| 17 | Yes         | 11      | 11-A | 1000   | exp   | 0   | unif   | wholeT_0.01 | J1:DiP, J1:DiP-A, J1:OT, J1:OT-A, J5:CBN, J5:CBN-A, J5:DiP, J5:DiP-A, J5:OT, J5:OT-A, S5:DiP, S5:DiP-A, S5:OT, S5:OT-A                                                     |
| 18 | Yes         | 11      | 11-A | 1000   | exp   | 0   | unif   | wholeT_0.5  | J1:CBN, J1:CBN-A, J1:DiP, J1:DiP-A, J1:OT, J1:OT-A, J5:CBN, J5:CBN-A, J5:DiP, J5:DiP-A, J5:OT, J5:OT-A, S1:DiP, S1:DiP-A, S1:OT, S1:OT-A, S5:DiP, S5:DiP-A, S5:OT, S5:OT-A |
| 19 | Yes         | 11      | 11-A | 1000   | exp   | Inf | last   | singleC     | J1:DiP, J1:DiP-A, J1:OT, J1:OT-A, J5:DiP, J5:DiP-A, J5:OT, J5:OT-A, S5:DiP, S5:OT                                                                                          |
| 20 | Yes         | 11      | 11-A | 1000   | exp   | Inf | last   | wholeT_0.01 | J5:DiP, J5:DiP-A, J5:OT, J5:OT-A, S5:DiP, S5:DiP-A, S5:OT, S5:OT-A                                                                                                         |
| 21 | Yes         | 11      | 11-A | 1000   | exp   | Inf | last   | wholeT_0.5  | J1:DiP, J1:DiP-A, J1:OT, J1:OT-A, J5:DiP, J5:DiP-A, J5:OT, J5:OT-A, S1:DiP-A, S5:DiP, S5:DiP-A, S5:OT, S5:OT-A                                                             |
| 22 | Yes         | 11      | 11-A | 1000   | exp   | Inf | unif   | singleC     | J1:DiP, J1:OT, J1:OT-A, J5:CBN, J5:CBN-A, J5:DiP, J5:DiP-A, J5:OT, J5:OT-A, S5:DiP, S5:DiP-A, S5:OT, S5:OT-A                                                               |

Table 16: (continued)

|    | Conjunction | Drivers | Tree | S.Size | Model | sh  | S.Time | S.Type      | Best method(s)                                                                                                                                                     |
|----|-------------|---------|------|--------|-------|-----|--------|-------------|--------------------------------------------------------------------------------------------------------------------------------------------------------------------|
| 23 | Yes         | 11      | 11-A | 1000   | exp   | Inf | unif   | wholeT_0.01 | J5:DiP, J5:DiP-A, J5:OT, J5:OT-A, S5:DiP, S5:DiP-A, S5:OT, S5:OT-A                                                                                                 |
| 24 | Yes         | 11      | 11-A | 1000   | exp   | Inf | unif   | wholeT_0.5  | J1:DiP, J1:DiP-A, J1:OT, J1:OT-A, J5:CBN, J5:CBN-A, J5:DiP, J5:DiP-A, J5:OT, J5:OT-A, S5:DiP, S5:OT, S5:OT-A                                                       |
| 25 | Yes         | 11      | 11-A | 1000   | McF_4 | 0   | last   | singleC     | J1:DiP, J1:DiP-A, J1:OT, J1:OT-A, J5:CBN, J5:DiP, J5:DiP-A, J5:OT, J5:OT-A, S1:DiP-A, S1:OT, S1:OT-A, S5:DiP, S5:DiP-A, S5:OT, S5:OT-A                             |
| 26 | Yes         | 11      | 11-A | 1000   | McF_4 | 0   | last   | wholeT_0.01 | J1:DiP, J1:DiP-A, J1:OT, J1:OT-A, J5:DiP, J5:DiP-A, J5:OT, J5:OT-A, S5:DiP, S5:DiP-A, S5:OT, S5:OT-A                                                               |
| 27 | Yes         | 11      | 11-A | 1000   | McF_4 | 0   | last   | wholeT_0.5  | J1:DiP, J1:DiP-A, J1:OT, J1:OT-A, J5:DiP, J5:DiP-A, J5:OT, J5:OT-A, S1:OT, S1:OT-A, S5:DiP, S5:DiP-A, S5:OT, S5:OT-A                                               |
| 28 | Yes         | 11      | 11-A | 1000   | McF_4 | 0   | unif   | singleC     | J1:CBN-A, J1:DiP, J1:DiP-A, J1:OT, J1:OT-A, J5:DiP, J5:DiP-A, J5:OT, J5:OT-A, S1:DiP, S1:DiP-A, S1:OT, S5:DiP, S5:DiP-A, S5:OT, S5:OT-A                            |
| 29 | Yes         | 11      | 11-A | 1000   | McF_4 | 0   | unif   | wholeT_0.01 | J1:CBN-A, J1:DiP, J1:DiP-A, J1:OT, J1:OT-A, J5:DiP, J5:DiP-A, J5:OT, J5:OT-A, S5:DiP, S5:DiP-A, S5:OT, S5:OT-A                                                     |
| 30 | Yes         | 11      | 11-A | 1000   | McF_4 | 0   | unif   | wholeT_0.5  | J1:CBN, J1:CBN-A, J1:DiP, J1:DiP-A, J1:OT, J1:OT-A, J5:DiP, J5:DiP-A, J5:OT, J5:OT-A, S1:DiP, S1:DiP-A, S1:OT, S1:OT-A, S5:CBN-A, S5:DiP, S5:DiP-A, S5:OT, S5:OT-A |
| 31 | Yes         | 11      | 11-A | 1000   | McF_4 | Inf | last   | singleC     | J1:DiP-A, J1:OT, J1:OT-A, J5:DiP, J5:DiP-A, J5:OT, J5:OT-A, S1:OT, S5:DiP, S5:DiP-A, S5:OT, S5:OT-A                                                                |
| 32 | Yes         | 11      | 11-A | 1000   | McF_4 | Inf | last   | wholeT_0.01 | J1:DiP, J1:DiP-A, J1:OT, J1:OT-A, J5:DiP, J5:DiP-A, J5:OT, J5:OT-A, S5:DiP, S5:DiP-A, S5:OT, S5:OT-A                                                               |
| 33 | Yes         | 11      | 11-A | 1000   | McF_4 | Inf | last   | wholeT_0.5  | J1:DiP, J1:DiP-A, J1:OT, J1:OT-A, J5:DiP, J5:DiP-A, J5:OT, J5:OT-A, S1:DiP-A, S1:OT, S1:OT-A, S5:DiP, S5:DiP-A, S5:OT, S5:OT-A                                     |

Table 16: (continued)

|    | Conjunction | Drivers | Tree | S.Size | Model | sh  | S.Time | S.Type      | Best method(s)                                                                                                                                                                        |
|----|-------------|---------|------|--------|-------|-----|--------|-------------|---------------------------------------------------------------------------------------------------------------------------------------------------------------------------------------|
| 34 | Yes         | 11      | 11-A | 1000   | McF_4 | Inf | unif   | singleC     | J1:CBN-A, J1:DiP, J1:DiP-A, J1:OT, J1:OT-A, J5:DiP, J5:DiP-A, J5:OT, J5:OT-A, S1:DiP, S1:DiP-A, S1:OT, S1:OT-A, S5:CBN-A, S5:DiP, S5:DiP-A, S5:OT, S5:OT-A                            |
| 35 | Yes         | 11      | 11-A | 1000   | McF_4 | Inf | unif   | wholeT_0.01 | J1:CBN-A, J1:DiP, J1:DiP-A, J1:OT, J1:OT-A, J5:DiP, J5:DiP-A, J5:OT, J5:OT-A, S5:CBN-A, S5:DiP, S5:DiP-A, S5:OT, S5:OT-A                                                              |
| 36 | Yes         | 11      | 11-A | 1000   | McF_4 | Inf | unif   | wholeT_0.5  | J1:CBN-A, J1:DiP, J1:DiP-A, J1:OT, J1:OT-A, J5:DiP, J5:DiP-A, J5:OT, J5:OT-A, S1:DiP, S1:DiP-A, S1:OT, S1:OT-A, S5:DiP, S5:DiP-A, S5:OT, S5:OT-A                                      |
| 37 | Yes         | 11      | 11-A | 1000   | McF_6 | 0   | last   | singleC     | J1:DiP, J1:OT, J5:DiP, J5:OT, S1:DiP, S1:OT, S5:DiP, S5:OT                                                                                                                            |
| 38 | Yes         | 11      | 11-A | 1000   | McF_6 | 0   | last   | wholeT_0.01 | J1:DiP, J1:OT, J5:DiP, J5:OT, S1:DiP, S5:DiP, S5:OT                                                                                                                                   |
| 39 | Yes         | 11      | 11-A | 1000   | McF_6 | 0   | last   | wholeT_0.5  | J1:DiP, J1:OT, J5:DiP, J5:OT, S1:DiP, S5:DiP, S5:OT                                                                                                                                   |
| 40 | Yes         | 11      | 11-A | 1000   | McF_6 | 0   | unif   | singleC     | J1:CBN, J1:CBN-A, J1:DiP, J1:DiP-A, J1:OT, J1:OT-A, J5:CBN, J5:CBN-A, J5:DiP, J5:DiP-A, J5:OT, J5:OT-A, S1:DiP, S1:DiP-A, S1:OT-A, S5:CBN, S5:CBN-A, S5:DiP, S5:DiP-A, S5:OT, S5:OT-A |
| 41 | Yes         | 11      | 11-A | 1000   | McF_6 | 0   | unif   | wholeT_0.01 | J1:CBN, J1:CBN-A, J1:DiP, J1:DiP-A, J1:OT, J1:OT-A, J5:CBN-A, J5:DiP, J5:DiP-A, J5:OT, J5:OT-A, S1:DiP, S1:DiP-A, S5:CBN, S5:CBN-A, S5:DiP, S5:DiP-A, S5:OT, S5:OT-A                  |
| 42 | Yes         | 11      | 11-A | 1000   | McF_6 | 0   | unif   | wholeT_0.5  | J1:CBN, J1:CBN-A, J1:DiP, J1:DiP-A, J1:OT, J5:CBN, J5:CBN-A, J5:DiP, J5:DiP-A, J5:OT, J5:OT-A, S1:DiP, S1:DiP-A, S1:OT, S1:OT-A, S5:CBN, S5:CBN-A, S5:DiP, S5:DiP-A, S5:OT, S5:OT-A   |
| 43 | Yes         | 11      | 11-A | 1000   | McF_6 | Inf | last   | singleC     | J1:DiP, J1:OT, J5:DiP, J5:OT, S1:DiP, S5:DiP, S5:OT                                                                                                                                   |

Table 16: (continued)

|    | Conjunction | Drivers | Tree | S.Size | Model | sh  | S.Time | S.Type      | Best method(s)                                                                                                                                           |
|----|-------------|---------|------|--------|-------|-----|--------|-------------|----------------------------------------------------------------------------------------------------------------------------------------------------------|
| 44 | Yes         | 11      | 11-A | 1000   | McF_6 | Inf | last   | wholeT_0.01 | J1:DiP, J1:OT, J5:DiP, J5:OT, S1:DiP, S5:DiP, S5:OT                                                                                                      |
| 45 | Yes         | 11      | 11-A | 1000   | McF_6 | Inf | last   | wholeT_0.5  | J1:DiP, J1:OT, J5:DiP, J5:OT, S1:DiP, S5:DiP, S5:OT                                                                                                      |
| 46 | Yes         | 11      | 11-A | 1000   | McF_6 | Inf | unif   | singleC     | J1:CBN-A, J1:DiP, J1:DiP-A, J1:OT, J1:OT-A, J5:CBN-A, J5:DiP, J5:OT, J5:OT-A, S1:DiP, S1:DiP-A, S5:DiP, S5:DiP-A, S5:OT                                  |
| 47 | Yes         | 11      | 11-A | 1000   | McF_6 | Inf | unif   | wholeT_0.01 | J1:CBN-A, J1:DiP, J1:DiP-A, J1:OT, J1:OT-A, J5:CBN-A, J5:DiP, J5:DiP-A, J5:OT, J5:OT-A, S1:DiP, S1:DiP-A, S5:CBN-A, S5:DiP, S5:DiP-A, S5:OT, S5:OT-A     |
| 48 | Yes         | 11      | 11-A | 1000   | McF_6 | Inf | unif   | wholeT_0.5  | J1:CBN-A, J1:DiP, J1:DiP-A, J5:CBN-A, J5:DiP, J5:DiP-A, J5:OT-A, S1:DiP, S1:DiP-A, S5:CBN-A, S5:DiP, S5:DiP-A, S5:OT                                     |
| 49 | Yes         | 11      | 11-A | 200    | Bozic | 0   | last   | singleC     | J1:DiP, J1:DiP-A, J1:OT, J1:OT-A, J5:DiP, J5:DiP-A, J5:OT, J5:OT-A, S5:DiP, S5:DiP-A, S5:OT, S5:OT-A                                                     |
| 50 | Yes         | 11      | 11-A | 200    | Bozic | 0   | last   | wholeT_0.01 | J1:DiP, J1:DiP-A, J1:OT, J1:OT-A, J5:DiP, J5:DiP-A, J5:OT, J5:OT-A, S5:DiP                                                                               |
| 51 | Yes         | 11      | 11-A | 200    | Bozic | 0   | last   | wholeT_0.5  | J1:DiP, J1:DiP-A, J1:OT, J1:OT-A, J5:DiP, J5:DiP-A, J5:OT, J5:OT-A, S1:DiP, S1:DiP-A, S5:DiP, S5:DiP-A, S5:OT, S5:OT-A                                   |
| 52 | Yes         | 11      | 11-A | 200    | Bozic | 0   | unif   | singleC     | J1:DiP, J1:DiP-A, J1:OT, J1:OT-A, J5:CBN, J5:CBN-A, J5:DiP, J5:DiP-A, J5:OT, J5:OT-A, S1:DiP, S1:DiP-A, S1:OT, S1:OT-A, S5:DiP, S5:DiP-A, S5:OT, S5:OT-A |
| 53 | Yes         | 11      | 11-A | 200    | Bozic | 0   | unif   | wholeT_0.01 | J5:DiP, J5:DiP-A, J5:OT, J5:OT-A                                                                                                                         |
| 54 | Yes         | 11      | 11-A | 200    | Bozic | 0   | unif   | wholeT_0.5  | J1:DiP, J1:DiP-A, J1:OT, J1:OT-A, J5:CBN, J5:CBN-A, J5:DiP, J5:DiP-A, J5:OT, J5:OT-A, S1:DiP, S1:DiP-A, S1:OT, S1:OT-A, S5:DiP, S5:DiP-A, S5:OT, S5:OT-A |

Table 16: (continued)

|    | Conjunction | Drivers | Tree | S.Size | Model | sh  | S.Time | S.Type      | Best method(s)                                                                                                                                                             |
|----|-------------|---------|------|--------|-------|-----|--------|-------------|----------------------------------------------------------------------------------------------------------------------------------------------------------------------------|
| 55 | Yes         | 11      | 11-A | 200    | Bozic | Inf | last   | singleC     | J1:DiP, J1:DiP-A, J5:DiP, J5:DiP-A, J5:OT, J5:OT-A, S5:DiP, S5:DiP-A, S5:OT                                                                                                |
| 56 | Yes         | 11      | 11-A | 200    | Bozic | Inf | last   | wholeT_0.01 | J5:DiP, J5:DiP-A, J5:OT, J5:OT-A                                                                                                                                           |
| 57 | Yes         | 11      | 11-A | 200    | Bozic | Inf | last   | wholeT_0.5  | J1:DiP, J1:DiP-A, J5:DiP, J5:DiP-A, J5:OT, J5:OT-A, S5:DiP, S5:DiP-A, S5:OT, S5:OT-A                                                                                       |
| 58 | Yes         | 11      | 11-A | 200    | Bozic | Inf | unif   | singleC     | J1:DiP, J1:DiP-A, J1:OT, J1:OT-A, J5:DiP, J5:DiP-A, J5:OT, J5:OT-A, S5:DiP, S5:DiP-A, S5:OT, S5:OT-A                                                                       |
| 59 | Yes         | 11      | 11-A | 200    | Bozic | Inf | unif   | wholeT_0.01 | J5:DiP, J5:OT, J5:OT-A                                                                                                                                                     |
| 60 | Yes         | 11      | 11-A | 200    | Bozic | Inf | unif   | wholeT_0.5  | J1:CBN-A, J1:DiP, J1:DiP-A, J1:OT, J1:OT-A, J5:DiP, J5:DiP-A, J5:OT, J5:OT-A, S5:DiP, S5:DiP-A, S5:OT, S5:OT-A                                                             |
| 61 | Yes         | 11      | 11-A | 200    | exp   | 0   | last   | singleC     | J1:DiP, J1:DiP-A, J1:OT, J1:OT-A, J5:CBN, J5:CBN-A, J5:DiP, J5:DiP-A, J5:OT, J5:OT-A, S1:DiP, S1:DiP-A, S1:OT, S1:OT-A, S5:DiP, S5:DiP-A, S5:OT, S5:OT-A                   |
| 62 | Yes         | 11      | 11-A | 200    | exp   | 0   | last   | wholeT_0.01 | J1:DiP, J1:DiP-A, J1:OT-A, J5:DiP, J5:DiP-A, J5:OT, J5:OT-A, S5:DiP, S5:OT, S5:OT-A                                                                                        |
| 63 | Yes         | 11      | 11-A | 200    | exp   | 0   | last   | wholeT_0.5  | J1:DiP, J1:DiP-A, J1:OT, J1:OT-A, J5:CBN, J5:CBN-A, J5:DiP-A, J5:OT, J5:OT-A, S1:DiP, S1:DiP-A, S1:OT, S1:OT-A, S5:DiP, S5:DiP-A, S5:OT, S5:OT-A                           |
| 64 | Yes         | 11      | 11-A | 200    | exp   | 0   | unif   | singleC     | J1:CBN, J1:CBN-A, J1:DiP, J1:DiP-A, J1:OT, J1:OT-A, J5:CBN, J5:CBN-A, J5:DiP, J5:DiP-A, J5:OT, J5:OT-A, S1:DiP, S1:DiP-A, S1:OT, S1:OT-A, S5:DiP, S5:DiP-A, S5:OT, S5:OT-A |
| 65 | Yes         | 11      | 11-A | 200    | exp   | 0   | unif   | wholeT_0.01 | J1:DiP, J1:DiP-A, J1:OT, J1:OT-A, J5:CBN, J5:CBN-A, J5:DiP, J5:DiP-A, J5:OT, J5:OT-A, S1:DiP, S1:OT, S1:OT-A, S5:DiP, S5:DiP-A, S5:OT, S5:OT-A                             |

Table 16: (continued)

|    | Conjunction | Drivers | Tree | S.Size | Model | sh  | S.Time | S.Type      | Best method(s)                                                                                                                                   |
|----|-------------|---------|------|--------|-------|-----|--------|-------------|--------------------------------------------------------------------------------------------------------------------------------------------------|
| 66 | Yes         | 11      | 11-A | 200    | exp   | 0   | unif   | wholeT_0.5  | J1:CBN, J1:DiP, J1:DiP-A, J1:OT, J1:OT-A, J5:CBN, J5:CBN-A, J5:DiP, J5:DiP-A, S1:DiP, S1:DiP-A, S1:OT, S1:OT-A, S5:DiP, S5:DiP-A, S5:OT, S5:OT-A |
| 67 | Yes         | 11      | 11-A | 200    | exp   | Inf | last   | singleC     | J1:DiP, J1:DiP-A, J1:OT, J1:OT-A, J5:DiP, J5:DiP-A, J5:OT, J5:OT-A, S1:DiP, S1:DiP-A, S5:DiP, S5:DiP-A, S5:OT, S5:OT-A                           |
| 68 | Yes         | 11      | 11-A | 200    | exp   | Inf | last   | wholeT_0.01 | J5:DiP, J5:DiP-A, J5:OT, J5:OT-A                                                                                                                 |
| 69 | Yes         | 11      | 11-A | 200    | exp   | Inf | last   | wholeT_0.5  | J1:DiP, J1:DiP-A, J1:OT, J1:OT-A, J5:DiP, J5:DiP-A, J5:OT, J5:OT-A, S1:DiP, S1:DiP-A, S5:DiP, S5:DiP-A, S5:OT, S5:OT-A                           |
| 70 | Yes         | 11      | 11-A | 200    | exp   | Inf | unif   | singleC     | J1:DiP, J1:DiP-A, J1:OT, J1:OT-A, J5:CBN, J5:CBN-A, J5:DiP, J5:DiP-A, J5:OT, J5:OT-A, S1:DiP, S1:DiP-A, S5:DiP, S5:DiP-A, S5:OT, S5:OT-A         |
| 71 | Yes         | 11      | 11-A | 200    | exp   | Inf | unif   | wholeT_0.01 | J5:DiP, J5:DiP-A, J5:OT, J5:OT-A, S5:OT, S5:OT-A                                                                                                 |
| 72 | Yes         | 11      | 11-A | 200    | exp   | Inf | unif   | wholeT_0.5  | J1:DiP, J1:DiP-A, J1:OT-A, J5:CBN, J5:DiP, J5:DiP-A, J5:OT, J5:OT-A, S1:DiP-A, S5:DiP, S5:DiP-A, S5:OT, S5:OT-A                                  |
| 73 | Yes         | 11      | 11-A | 200    | McF_4 | 0   | last   | singleC     | J1:DiP, J1:DiP-A, J1:OT, J1:OT-A, J5:DiP, J5:DiP-A, J5:OT, J5:OT-A, S5:DiP, S5:DiP-A, S5:OT, S5:OT-A                                             |
| 74 | Yes         | 11      | 11-A | 200    | McF_4 | 0   | last   | wholeT_0.01 | J1:DiP, J1:DiP-A, J1:OT, J1:OT-A, J5:DiP, J5:DiP-A, J5:OT, J5:OT-A, S5:DiP, S5:OT, S5:OT-A                                                       |
| 75 | Yes         | 11      | 11-A | 200    | McF_4 | 0   | last   | wholeT_0.5  | J1:DiP, J1:DiP-A, J1:OT, J1:OT-A, J5:DiP, J5:DiP-A, J5:OT, J5:OT-A, S5:DiP, S5:DiP-A, S5:OT, S5:OT-A                                             |
| 76 | Yes         | 11      | 11-A | 200    | McF_4 | 0   | unif   | singleC     | J1:CBN-A, J1:DiP, J1:DiP-A, J1:OT, J1:OT-A, J5:DiP, J5:DiP-A, J5:OT, J5:OT-A, S1:DiP, S1:DiP-A, S5:DiP, S5:DiP-A, S5:OT, S5:OT-A                 |

Table 16: (continued)

|    | Conjunction | Drivers | Tree | S.Size | Model | sh  | S.Time | S.Type      | Best method(s)                                                                                                                   |
|----|-------------|---------|------|--------|-------|-----|--------|-------------|----------------------------------------------------------------------------------------------------------------------------------|
| 77 | Yes         | 11      | 11-A | 200    | McF_4 | 0   | unif   | wholeT_0.01 | J1:CBN-A, J1:DiP, J1:DiP-A, J1:OT, J1:OT-A, J5:DiP, J5:DiP-A, J5:OT, J5:OT-A, S1:DiP, S5:DiP, S5:DiP-A, S5:OT, S5:OT-A           |
| 78 | Yes         | 11      | 11-A | 200    | McF_4 | 0   | unif   | wholeT_0.5  | J1:CBN-A, J1:DiP, J1:DiP-A, J1:OT, J1:OT-A, J5:DiP, J5:DiP-A, J5:OT, J5:OT-A, S1:DiP, S1:DiP-A, S5:DiP, S5:DiP-A, S5:OT, S5:OT-A |
| 79 | Yes         | 11      | 11-A | 200    | McF_4 | Inf | last   | singleC     | J1:DiP, J1:DiP-A, J1:OT, J1:OT-A, J5:DiP, J5:DiP-A, J5:OT, J5:OT-A, S5:DiP, S5:DiP-A, S5:OT, S5:OT-A                             |
| 80 | Yes         | 11      | 11-A | 200    | McF_4 | Inf | last   | wholeT_0.01 | J1:DiP, J1:DiP-A, J1:OT, J1:OT-A, J5:DiP, J5:DiP-A, J5:OT, J5:OT-A                                                               |
| 81 | Yes         | 11      | 11-A | 200    | McF_4 | Inf | last   | wholeT_0.5  | J1:DiP, J1:DiP-A, J1:OT, J1:OT-A, J5:DiP, J5:OT, J5:OT-A, S1:DiP, S1:DiP-A, S5:DiP, S5:DiP-A, S5:OT, S5:OT-A                     |
| 82 | Yes         | 11      | 11-A | 200    | McF_4 | Inf | unif   | singleC     | J1:CBN-A, J1:DiP, J1:DiP-A, J1:OT, J1:OT-A, J5:DiP, J5:DiP-A, J5:OT, J5:OT-A, S5:CBN-A, S5:DiP-A, S5:OT, S5:OT-A                 |
| 83 | Yes         | 11      | 11-A | 200    | McF_4 | Inf | unif   | wholeT_0.01 | J1:DiP, J1:DiP-A, J1:OT, J1:OT-A, J5:DiP, J5:DiP-A, J5:OT, J5:OT-A, S1:DiP, S1:DiP-A, S5:CBN-A, S5:DiP, S5:OT, S5:OT-A           |
| 84 | Yes         | 11      | 11-A | 200    | McF_4 | Inf | unif   | wholeT_0.5  | J1:CBN-A, J1:DiP, J1:DiP-A, J1:OT, J5:DiP, J5:DiP-A, J5:OT, J5:OT-A, S1:DiP, S5:DiP, S5:OT, S5:OT-A                              |
| 85 | Yes         | 11      | 11-A | 200    | McF_6 | 0   | last   | singleC     | J1:DiP, J1:OT, J5:DiP, J5:OT, S1:DiP, S5:DiP                                                                                     |
| 86 | Yes         | 11      | 11-A | 200    | McF_6 | 0   | last   | wholeT_0.01 | J1:DiP, J5:DiP, J5:OT, S1:DiP, S5:DiP, S5:OT                                                                                     |
| 87 | Yes         | 11      | 11-A | 200    | McF_6 | 0   | last   | wholeT_0.5  | J1:DiP, J1:OT, J5:DiP, J5:OT, S1:DiP, S5:DiP, S5:OT                                                                              |
| 88 | Yes         | 11      | 11-A | 200    | McF_6 | 0   | unif   | singleC     | J1:CBN, J1:CBN-A, J1:OT, J5:CBN, J5:CBN-A, J5:DiP, J5:DiP-A, J5:OT, J5:OT-A, S5:CBN, S5:CBN-A                                    |

Table 16: (continued)

|     | Conjunction | Drivers | Tree | S.Size | Model | sh  | S.Time | S.Type      | Best method(s)                                                                                                                                     |
|-----|-------------|---------|------|--------|-------|-----|--------|-------------|----------------------------------------------------------------------------------------------------------------------------------------------------|
| 89  | Yes         | 11      | 11-A | 200    | McF_6 | 0   | unif   | wholeT_0.01 | J1:CBN, J1:CBN-A, J1:DiP, J1:DiP-A, J1:OT, J1:OT-A, J5:CBN, J5:CBN-A, J5:DiP, J5:DiP-A, J5:OT, J5:OT-A, S5:CBN, S5:CBN-A, S5:DiP-A, S5:OT, S5:OT-A |
| 90  | Yes         | 11      | 11-A | 200    | McF_6 | 0   | unif   | wholeT_0.5  | J1:CBN, J1:CBN-A, J1:DiP, J5:CBN, J5:CBN-A, J5:DiP, S5:CBN, S5:CBN-A, S5:OT                                                                        |
| 91  | Yes         | 11      | 11-A | 200    | McF_6 | Inf | last   | singleC     | J1:DiP, J1:OT, J5:DiP, J5:OT, S1:DiP, S5:DiP, S5:OT                                                                                                |
| 92  | Yes         | 11      | 11-A | 200    | McF_6 | Inf | last   | wholeT_0.01 | J1:DiP, J1:OT, J5:DiP, J5:OT, S1:DiP, S5:DiP, S5:OT                                                                                                |
| 93  | Yes         | 11      | 11-A | 200    | McF_6 | Inf | last   | wholeT_0.5  | J1:DiP, J1:OT, J5:DiP, J5:OT, S1:DiP, S5:DiP, S5:OT                                                                                                |
| 94  | Yes         | 11      | 11-A | 200    | McF_6 | Inf | unif   | singleC     | J1:CBN-A, J5:CBN, J5:CBN-A, J5:OT, J5:OT-A, S5:CBN, S5:CBN-A                                                                                       |
| 95  | Yes         | 11      | 11-A | 200    | McF_6 | Inf | unif   | wholeT_0.01 | J1:CBN-A, J1:OT, J1:OT-A, J5:CBN-A, J5:DiP, J5:DiP-A, J5:OT, J5:OT-A, S5:CBN, S5:CBN-A, S5:OT, S5:OT-A                                             |
| 96  | Yes         | 11      | 11-A | 200    | McF_6 | Inf | unif   | wholeT_0.5  | J1:CBN-A, J1:OT, J1:OT-A, J5:CBN, J5:CBN-A, J5:DiP, J5:DiP-A, J5:OT, J5:OT-A, S5:CBN, S5:CBN-A, S5:OT, S5:OT-A                                     |
| 97  | Yes         | 11      | 11-A | 100    | Bozic | 0   | last   | singleC     | J1:DiP, J1:DiP-A, J5:DiP, J5:DiP-A, J5:OT, J5:OT-A, S1:DiP, S1:DiP-A, S5:DiP, S5:DiP-A, S5:OT, S5:OT-A                                             |
| 98  | Yes         | 11      | 11-A | 100    | Bozic | 0   | last   | wholeT_0.01 | J1:DiP, J1:DiP-A, J5:DiP, J5:DiP-A, J5:OT, J5:OT-A                                                                                                 |
| 99  | Yes         | 11      | 11-A | 100    | Bozic | 0   | last   | wholeT_0.5  | J1:DiP, J1:DiP-A, J5:DiP, J5:DiP-A, J5:OT, J5:OT-A, S1:DiP, S1:DiP-A, S5:DiP, S5:DiP-A, S5:OT, S5:OT-A                                             |
| 100 | Yes         | 11      | 11-A | 100    | Bozic | 0   | unif   | singleC     | J1:DiP, J1:DiP-A, J1:OT, J1:OT-A, J5:CBN, J5:CBN-A, J5:DiP, J5:DiP-A, J5:OT, J5:OT-A, S1:DiP, S1:DiP-A, S5:DiP, S5:DiP-A, S5:OT, S5:OT-A           |
| 101 | Yes         | 11      | 11-A | 100    | Bozic | 0   | unif   | wholeT_0.01 | J5:DiP, J5:DiP-A, J5:OT, J5:OT-A, S5:OT                                                                                                            |



Table 16: (continued)

|     | Conjunction | Drivers | Tree | S.Size | Model | sh  | S.Time | S.Type      | Best method(s)                                                                                                                                          |
|-----|-------------|---------|------|--------|-------|-----|--------|-------------|---------------------------------------------------------------------------------------------------------------------------------------------------------|
| 102 | Yes         | 11      | 11-A | 100    | Bozic | 0   | unif   | wholeT_0.5  | J1:DiP, J1:DiP-A, J5:CBN, J5:CBN-A, J5:DiP, J5:DiP-A, J5:OT, S1:DiP, S1:DiP-A, S5:DiP, S5:DiP-A, S5:OT, S5:OT-A                                         |
| 103 | Yes         | 11      | 11-A | 100    | Bozic | Inf | last   | singleC     | J1:DiP, J1:DiP-A, J5:DiP, J5:DiP-A, J5:OT, J5:OT-A, S1:DiP, S5:DiP, S5:DiP-A                                                                            |
| 104 | Yes         | 11      | 11-A | 100    | Bozic | Inf | last   | wholeT_0.01 | J5:DiP, J5:DiP-A, J5:OT, J5:OT-A                                                                                                                        |
| 105 | Yes         | 11      | 11-A | 100    | Bozic | Inf | last   | wholeT_0.5  | J1:DiP, J1:DiP-A, J5:DiP, J5:DiP-A, J5:OT, J5:OT-A, S1:DiP, S5:DiP, S5:DiP-A                                                                            |
| 106 | Yes         | 11      | 11-A | 100    | Bozic | Inf | unif   | singleC     | J1:DiP, J1:DiP-A, J5:DiP, J5:DiP-A, J5:OT, J5:OT-A, S5:DiP, S5:DiP-A, S5:OT, S5:OT-A                                                                    |
| 107 | Yes         | 11      | 11-A | 100    | Bozic | Inf | unif   | wholeT_0.01 | J5:DiP, J5:DiP-A, J5:OT, J5:OT-A                                                                                                                        |
| 108 | Yes         | 11      | 11-A | 100    | Bozic | Inf | unif   | wholeT_0.5  | J1:DiP, J1:DiP-A, J5:CBN-A, J5:DiP, J5:DiP-A, J5:OT, J5:OT-A, S5:DiP, S5:DiP-A, S5:OT, S5:OT-A                                                          |
| 109 | Yes         | 11      | 11-A | 100    | exp   | 0   | last   | singleC     | J1:DiP, J1:DiP-A, J1:OT, J1:OT-A, J5:CBN, J5:CBN-A, J5:DiP, J5:DiP-A, J5:OT, J5:OT-A, S1:DiP, S1:DiP-A, S5:DiP, S5:DiP-A, S5:OT, S5:OT-A                |
| 110 | Yes         | 11      | 11-A | 100    | exp   | 0   | last   | wholeT_0.01 | J1:DiP, J1:DiP-A, J1:OT, J1:OT-A, J5:DiP, J5:DiP-A, J5:OT, J5:OT-A, S1:DiP, S1:DiP-A, S5:DiP, S5:DiP-A, S5:OT, S5:OT-A                                  |
| 111 | Yes         | 11      | 11-A | 100    | exp   | 0   | last   | wholeT_0.5  | J1:DiP, J1:DiP-A, J1:OT, J1:OT-A, J5:CBN, J5:CBN-A, J5:DiP, J5:DiP-A, J5:OT, J5:OT-A, S1:DiP, S1:DiP-A, S1:OT-A, S5:DiP, S5:DiP-A, S5:OT, S5:OT-A       |
| 112 | Yes         | 11      | 11-A | 100    | exp   | 0   | unif   | singleC     | J1:CBN, J1:DiP, J1:DiP-A, J1:OT, J1:OT-A, J5:CBN, J5:CBN-A, J5:DiP, J5:DiP-A, J5:OT, J5:OT-A, S1:DiP, S1:DiP-A, S1:OT, S5:DiP, S5:DiP-A, S5:OT, S5:OT-A |
| 113 | Yes         | 11      | 11-A | 100    | exp   | 0   | unif   | wholeT_0.01 | J1:DiP, J1:DiP-A, J5:CBN, J5:CBN-A, J5:DiP, J5:DiP-A, J5:OT, J5:OT-A, S1:DiP, S1:DiP-A, S5:DiP, S5:DiP-A, S5:OT, S5:OT-A                                |

Table 16: (continued)

|     | Conjunction | Drivers | Tree | S.Size | Model | sh  | S.Time | S.Type      | Best method(s)                                                                                                                           |
|-----|-------------|---------|------|--------|-------|-----|--------|-------------|------------------------------------------------------------------------------------------------------------------------------------------|
| 114 | Yes         | 11      | 11-A | 100    | exp   | 0   | unif   | wholeT_0.5  | J1:DiP, J1:DiP-A, J5:CBN, J5:CBN-A, J5:DiP, J5:DiP-A, J5:OT, J5:OT-A, S1:DiP, S1:DiP-A, S5:DiP, S5:DiP-A, S5:OT, S5:OT-A                 |
| 115 | Yes         | 11      | 11-A | 100    | exp   | Inf | last   | singleC     | J1:DiP, J1:DiP-A, J5:DiP, J5:DiP-A, J5:OT, J5:OT-A, S1:DiP, S1:DiP-A, S5:DiP, S5:DiP-A, S5:OT, S5:OT-A                                   |
| 116 | Yes         | 11      | 11-A | 100    | exp   | Inf | last   | wholeT_0.01 | J5:DiP, J5:DiP-A, J5:OT, J5:OT-A                                                                                                         |
| 117 | Yes         | 11      | 11-A | 100    | exp   | Inf | last   | wholeT_0.5  | J1:DiP, J1:DiP-A, J5:DiP, J5:DiP-A, J5:OT, J5:OT-A, S1:DiP, S1:DiP-A, S5:DiP, S5:DiP-A, S5:OT, S5:OT-A                                   |
| 118 | Yes         | 11      | 11-A | 100    | exp   | Inf | unif   | singleC     | J1:DiP, J1:DiP-A, J5:CBN, J5:CBN-A, J5:DiP, J5:DiP-A, J5:OT, J5:OT-A, S1:DiP, S5:DiP, S5:DiP-A, S5:OT, S5:OT-A                           |
| 119 | Yes         | 11      | 11-A | 100    | exp   | Inf | unif   | wholeT_0.01 | J5:DiP, J5:DiP-A, J5:OT, J5:OT-A, S5:OT-A                                                                                                |
| 120 | Yes         | 11      | 11-A | 100    | exp   | Inf | unif   | wholeT_0.5  | J1:DiP, J1:DiP-A, J5:CBN, J5:CBN-A, J5:DiP, J5:DiP-A, J5:OT, J5:OT-A, S1:DiP, S1:DiP-A, S5:DiP, S5:DiP-A, S5:OT, S5:OT-A                 |
| 121 | Yes         | 11      | 11-A | 100    | McF_4 | 0   | last   | singleC     | J1:DiP, J1:DiP-A, J5:DiP, J5:DiP-A, J5:OT, J5:OT-A, S1:DiP, S1:DiP-A, S5:DiP, S5:DiP-A, S5:OT, S5:OT-A                                   |
| 122 | Yes         | 11      | 11-A | 100    | McF_4 | 0   | last   | wholeT_0.01 | J1:DiP, J1:DiP-A, J5:DiP, J5:DiP-A, J5:OT, J5:OT-A, S1:DiP, S1:DiP-A, S5:DiP, S5:DiP-A, S5:OT, S5:OT-A                                   |
| 123 | Yes         | 11      | 11-A | 100    | McF_4 | 0   | last   | wholeT_0.5  | J1:DiP, J1:DiP-A, J5:DiP, J5:DiP-A, J5:OT, J5:OT-A, S1:DiP, S1:DiP-A, S5:DiP, S5:DiP-A, S5:OT, S5:OT-A                                   |
| 124 | Yes         | 11      | 11-A | 100    | McF_4 | 0   | unif   | singleC     | J1:CBN, J1:DiP, J1:DiP-A, J1:OT, J1:OT-A, J5:DiP, J5:DiP-A, J5:OT, J5:OT-A, S1:DiP, S1:DiP-A, S5:CBN-A, S5:DiP, S5:DiP-A, S5:OT, S5:OT-A |
| 125 | Yes         | 11      | 11-A | 100    | McF_4 | 0   | unif   | wholeT_0.01 | J1:DiP, J1:DiP-A, J5:DiP, J5:DiP-A, J5:OT, J5:OT-A, S5:DiP, S5:DiP-A                                                                     |
| 126 | Yes         | 11      | 11-A | 100    | McF_4 | 0   | unif   | wholeT_0.5  | J1:CBN-A, J1:DiP, J1:DiP-A, J1:OT-A, J5:DiP, J5:DiP-A, J5:OT, J5:OT-A, S1:DiP, S5:CBN-A, S5:DiP, S5:OT, S5:OT-A                          |

Table 16: (continued)

|     | Conjunction | Drivers | Tree | S.Size | Model | sh  | S.Time | S.Type      | Best method(s)                                                                                          |
|-----|-------------|---------|------|--------|-------|-----|--------|-------------|---------------------------------------------------------------------------------------------------------|
| 127 | Yes         | 11      | 11-A | 100    | McF_4 | Inf | last   | singleC     | J1:DiP, J5:DiP, J5:DiP-A, J5:OT, J5:OT-A, S1:DiP, S1:DiP-A, S5:DiP, S5:DiP-A, S5:OT, S5:OT-A            |
| 128 | Yes         | 11      | 11-A | 100    | McF_4 | Inf | last   | wholeT_0.01 | J1:DiP, J1:DiP-A, J5:DiP, J5:DiP-A, J5:OT, J5:OT-A, S1:DiP, S1:DiP-A, S5:DiP, S5:DiP-A                  |
| 129 | Yes         | 11      | 11-A | 100    | McF_4 | Inf | last   | wholeT_0.5  | J1:DiP, J1:DiP-A, J5:DiP, J5:DiP-A, J5:OT, J5:OT-A, S1:DiP, S1:DiP-A, S5:DiP, S5:DiP-A, S5:OT, S5:OT-A  |
| 130 | Yes         | 11      | 11-A | 100    | McF_4 | Inf | unif   | singleC     | J1:DiP, J1:DiP-A, J1:OT, J5:DiP, J5:DiP-A, J5:OT, S1:DiP, S1:DiP-A, S5:CBN-A, S5:DiP, S5:DiP-A, S5:OT-A |
| 131 | Yes         | 11      | 11-A | 100    | McF_4 | Inf | unif   | wholeT_0.01 | J1:DiP-A, J5:DiP, J5:DiP-A, J5:OT, J5:OT-A, S5:DiP                                                      |
| 132 | Yes         | 11      | 11-A | 100    | McF_4 | Inf | unif   | wholeT_0.5  | J1:DiP, J1:DiP-A, J5:CBN-A, J5:DiP, J5:DiP-A, J5:OT, J5:OT-A, S5:CBN-A                                  |
| 133 | Yes         | 11      | 11-A | 100    | McF_6 | 0   | last   | singleC     | J1:DiP, J1:OT, J5:DiP, J5:OT, S1:DiP, S5:DiP                                                            |
| 134 | Yes         | 11      | 11-A | 100    | McF_6 | 0   | last   | wholeT_0.01 | J1:DiP, J5:DiP, J5:OT, S1:DiP, S5:DiP, S5:OT                                                            |
| 135 | Yes         | 11      | 11-A | 100    | McF_6 | 0   | last   | wholeT_0.5  | J1:DiP, J1:OT, J5:DiP, J5:OT, S1:DiP, S5:DiP, S5:OT                                                     |
| 136 | Yes         | 11      | 11-A | 100    | McF_6 | 0   | unif   | singleC     | J1:CBN-A, J5:CBN, J5:CBN-A, J5:DiP, J5:OT, J5:OT-A                                                      |
| 137 | Yes         | 11      | 11-A | 100    | McF_6 | 0   | unif   | wholeT_0.01 | J1:DiP, J5:CBN, J5:CBN-A, J5:DiP, J5:OT, J5:OT-A                                                        |
| 138 | Yes         | 11      | 11-A | 100    | McF_6 | 0   | unif   | wholeT_0.5  | J5:CBN-A, J5:DiP, J5:DiP-A, J5:OT, S5:CBN, S5:CBN-A                                                     |
| 139 | Yes         | 11      | 11-A | 100    | McF_6 | Inf | last   | singleC     | J1:DiP, J1:OT, J5:DiP, J5:OT, S1:DiP, S5:DiP, S5:OT                                                     |
| 140 | Yes         | 11      | 11-A | 100    | McF_6 | Inf | last   | wholeT_0.01 | J1:DiP, J5:DiP, J5:OT, S1:DiP, S5:DiP                                                                   |
| 141 | Yes         | 11      | 11-A | 100    | McF_6 | Inf | last   | wholeT_0.5  | J1:DiP, J5:DiP, J5:OT                                                                                   |
| 142 | Yes         | 11      | 11-A | 100    | McF_6 | Inf | unif   | singleC     | J1:CBN, J1:CBN-A, J5:CBN-A, J5:DiP, J5:DiP-A, J5:OT, J5:OT-A                                            |
| 143 | Yes         | 11      | 11-A | 100    | McF_6 | Inf | unif   | wholeT_0.01 | J1:DiP, J5:CBN-A, J5:DiP, J5:DiP-A, J5:OT, J5:OT-A, S5:CBN, S5:CBN-A                                    |
| 144 | Yes         | 11      | 11-A | 100    | McF_6 | Inf | unif   | wholeT_0.5  | J1:CBN-A, J1:DiP, J5:CBN-A, J5:DiP, J5:DiP-A, J5:OT, S5:CBN, S5:CBN-A, S5:OT                            |

Table 16: (continued)

|     | Conjunction | Drivers | Tree | S.Size | Model | sh  | S.Time | S.Type      | Best method(s)                                                                                                                                                      |
|-----|-------------|---------|------|--------|-------|-----|--------|-------------|---------------------------------------------------------------------------------------------------------------------------------------------------------------------|
| 145 | Yes         | 9       | 9-A  | 1000   | Bozic | 0   | last   | singleC     | J1:DiP, J1:DiP-A, J1:OT, J1:OT-A, J5:DiP, J5:OT, J5:OT-A, S1:OT, S1:OT-A, S5:DiP, S5:DiP-A, S5:OT, S5:OT-A                                                          |
| 146 | Yes         | 9       | 9-A  | 1000   | Bozic | 0   | last   | wholeT_0.01 | J1:DiP, J1:DiP-A, J1:OT, J1:OT-A, J5:DiP, J5:DiP-A, J5:OT, J5:OT-A, S1:DiP, S1:DiP-A, S1:OT, S1:OT-A, S5:DiP, S5:DiP-A, S5:OT, S5:OT-A                              |
| 147 | Yes         | 9       | 9-A  | 1000   | Bozic | 0   | last   | wholeT_0.5  | J1:DiP, J1:DiP-A, J1:OT, J1:OT-A, J5:CBN, J5:CBN-A, J5:DiP, J5:DiP-A, J5:OT, J5:OT-A, S1:OT, S1:OT-A, S5:DiP, S5:DiP-A, S5:OT, S5:OT-A                              |
| 148 | Yes         | 9       | 9-A  | 1000   | Bozic | 0   | unif   | singleC     | J1:DiP, J1:DiP-A, J1:OT, J1:OT-A, J5:DiP, J5:DiP-A, J5:OT, S1:DiP, S1:DiP-A, S1:OT, S1:OT-A, S5:DiP-A, S5:OT-A                                                      |
| 149 | Yes         | 9       | 9-A  | 1000   | Bozic | 0   | unif   | wholeT_0.01 | J1:DiP, J1:DiP-A, J1:OT, J1:OT-A, J5:DiP, J5:DiP-A, J5:OT, J5:OT-A, S1:DiP, S1:DiP-A, S1:OT, S1:OT-A, S5:DiP, S5:DiP-A, S5:OT, S5:OT-A                              |
| 150 | Yes         | 9       | 9-A  | 1000   | Bozic | 0   | unif   | wholeT_0.5  | J1:CBN, J1:CBN-A, J1:DiP, J1:DiP-A, J1:OT, J1:OT-A, J5:CBN, J5:CBN-A, J5:DiP, J5:DiP-A, J5:OT-A, S1:DiP, S1:DiP-A, S1:OT, S1:OT-A, S5:DiP, S5:DiP-A, S5:OT, S5:OT-A |
| 151 | Yes         | 9       | 9-A  | 1000   | Bozic | Inf | last   | singleC     | J1:DiP, J1:DiP-A, J1:OT-A, J5:DiP, J5:DiP-A, J5:OT, J5:OT-A, S5:OT, S5:OT-A                                                                                         |
| 152 | Yes         | 9       | 9-A  | 1000   | Bozic | Inf | last   | wholeT_0.01 | J5:DiP, J5:DiP-A, J5:OT, J5:OT-A                                                                                                                                    |
| 153 | Yes         | 9       | 9-A  | 1000   | Bozic | Inf | last   | wholeT_0.5  | J1:DiP, J1:DiP-A, J1:OT, J1:OT-A, J5:DiP, J5:DiP-A, J5:OT, J5:OT-A, S5:DiP-A, S5:OT                                                                                 |
| 154 | Yes         | 9       | 9-A  | 1000   | Bozic | Inf | unif   | singleC     | J1:DiP, J1:DiP-A, J1:OT, J1:OT-A, J5:DiP, J5:DiP-A, J5:OT, S1:DiP, S1:OT, S5:DiP, S5:DiP-A, S5:OT, S5:OT-A                                                          |
| 155 | Yes         | 9       | 9-A  | 1000   | Bozic | Inf | unif   | wholeT_0.01 | J5:DiP, J5:DiP-A, J5:OT, J5:OT-A, S5:DiP, S5:DiP-A, S5:OT, S5:OT-A                                                                                                  |

Table 16: (continued)

|     | Conjunction | Drivers | Tree | S.Size | Model | sh  | S.Time | S.Type      | Best method(s)                                                                                                                                                             |
|-----|-------------|---------|------|--------|-------|-----|--------|-------------|----------------------------------------------------------------------------------------------------------------------------------------------------------------------------|
| 156 | Yes         | 9       | 9-A  | 1000   | Bozic | Inf | unif   | wholeT_0.5  | J1:DiP, J1:DiP-A, J1:OT, J1:OT-A, J5:CBN, J5:CBN-A, J5:DiP, J5:DiP-A, J5:OT, J5:OT-A, S1:DiP-A, S1:OT, S1:OT-A, S5:DiP, S5:DiP-A, S5:OT, S5:OT-A                           |
| 157 | Yes         | 9       | 9-A  | 1000   | exp   | 0   | last   | singleC     | J1:DiP, J1:DiP-A, J1:OT, J1:OT-A, J5:CBN, J5:CBN-A, J5:DiP, J5:DiP-A, J5:OT, J5:OT-A, S1:DiP, S1:DiP-A, S1:OT, S1:OT-A, S5:DiP, S5:DiP-A, S5:OT, S5:OT-A                   |
| 158 | Yes         | 9       | 9-A  | 1000   | exp   | 0   | last   | wholeT_0.01 | J1:DiP, J1:DiP-A, J1:OT, J1:OT-A, J5:DiP, J5:DiP-A, J5:OT, J5:OT-A, S1:DiP-A, S1:OT, S1:OT-A, S5:DiP, S5:DiP-A, S5:OT, S5:OT-A                                             |
| 159 | Yes         | 9       | 9-A  | 1000   | exp   | 0   | last   | wholeT_0.5  | J1:DiP, J1:DiP-A, J1:OT, J1:OT-A, J5:CBN, J5:CBN-A, J5:DiP, J5:DiP-A, J5:OT-A, S1:DiP, S1:DiP-A, S1:OT, S1:OT-A, S5:DiP, S5:DiP-A, S5:OT, S5:OT-A                          |
| 160 | Yes         | 9       | 9-A  | 1000   | exp   | 0   | unif   | singleC     | J1:CBN, J1:CBN-A, J1:DiP, J1:DiP-A, J1:OT, J1:OT-A, J5:CBN, J5:CBN-A, J5:DiP, J5:DiP-A, J5:OT, J5:OT-A, S1:DiP, S1:DiP-A, S1:OT, S1:OT-A, S5:DiP, S5:DiP-A, S5:OT, S5:OT-A |
| 161 | Yes         | 9       | 9-A  | 1000   | exp   | 0   | unif   | wholeT_0.01 | J1:DiP, J1:DiP-A, J1:OT, J1:OT-A, J5:CBN, J5:CBN-A, J5:DiP, J5:DiP-A, J5:OT, J5:OT-A, S1:DiP, S1:DiP-A, S1:OT, S1:OT-A, S5:DiP, S5:DiP-A, S5:OT, S5:OT-A                   |
| 162 | Yes         | 9       | 9-A  | 1000   | exp   | 0   | unif   | wholeT_0.5  | J1:CBN, J1:CBN-A, J1:DiP, J1:DiP-A, J1:OT, J1:OT-A, J5:CBN, J5:CBN-A, J5:DiP, J5:DiP-A, J5:OT, J5:OT-A, S1:DiP, S1:DiP-A, S1:OT, S1:OT-A, S5:DiP, S5:DiP-A, S5:OT, S5:OT-A |
| 163 | Yes         | 9       | 9-A  | 1000   | exp   | Inf | last   | singleC     | J1:DiP, J1:DiP-A, J1:OT, J1:OT-A, J5:DiP, J5:DiP-A, J5:OT, J5:OT-A, S5:DiP, S5:DiP-A, S5:OT, S5:OT-A                                                                       |
| 164 | Yes         | 9       | 9-A  | 1000   | exp   | Inf | last   | wholeT_0.01 | J5:DiP, J5:DiP-A, J5:OT, J5:OT-A                                                                                                                                           |

Table 16: (continued)

|     | Conjunction | Drivers | Tree | S.Size | Model | sh  | S.Time | S.Type      | Best method(s)                                                                                                                                           |
|-----|-------------|---------|------|--------|-------|-----|--------|-------------|----------------------------------------------------------------------------------------------------------------------------------------------------------|
| 165 | Yes         | 9       | 9-A  | 1000   | exp   | Inf | last   | wholeT_0.5  | J1:DiP, J1:DiP-A, J1:OT, J1:OT-A, J5:DiP, J5:DiP-A, J5:OT, J5:OT-A, S5:DiP, S5:DiP-A, S5:OT, S5:OT-A                                                     |
| 166 | Yes         | 9       | 9-A  | 1000   | exp   | Inf | unif   | singleC     | J1:DiP, J1:DiP-A, J1:OT, J1:OT-A, J5:CBN, J5:CBN-A, J5:DiP, J5:DiP-A, J5:OT, J5:OT-A, S1:DiP, S1:DiP-A, S1:OT, S1:OT-A, S5:DiP, S5:DiP-A, S5:OT, S5:OT-A |
| 167 | Yes         | 9       | 9-A  | 1000   | exp   | Inf | unif   | wholeT_0.01 | J1:DiP, J1:DiP-A, J1:OT, J1:OT-A, J5:DiP, J5:DiP-A, J5:OT, J5:OT-A, S5:DiP, S5:DiP-A, S5:OT, S5:OT-A                                                     |
| 168 | Yes         | 9       | 9-A  | 1000   | exp   | Inf | unif   | wholeT_0.5  | J1:DiP, J1:DiP-A, J1:OT, J1:OT-A, J5:CBN, J5:CBN-A, J5:DiP, J5:DiP-A, J5:OT, J5:OT-A, S1:DiP, S1:DiP-A, S1:OT, S5:DiP, S5:DiP-A, S5:OT, S5:OT-A          |
| 169 | Yes         | 9       | 9-A  | 1000   | McF_4 | 0   | last   | singleC     | J1:DiP, J1:DiP-A, J1:OT, J1:OT-A, J5:DiP, J5:DiP-A, J5:OT, J5:OT-A, S1:DiP, S1:DiP-A, S1:OT, S1:OT-A, S5:DiP, S5:DiP-A, S5:OT, S5:OT-A                   |
| 170 | Yes         | 9       | 9-A  | 1000   | McF_4 | 0   | last   | wholeT_0.01 | J1:DiP, J1:DiP-A, J1:OT, J1:OT-A, J5:CBN, J5:DiP, J5:DiP-A, J5:OT, J5:OT-A, S5:DiP, S5:DiP-A, S5:OT, S5:OT-A                                             |
| 171 | Yes         | 9       | 9-A  | 1000   | McF_4 | 0   | last   | wholeT_0.5  | J1:DiP, J1:DiP-A, J1:OT, J1:OT-A, J5:DiP, J5:DiP-A, J5:OT, J5:OT-A, S1:DiP, S1:DiP-A, S1:OT, S1:OT-A, S5:DiP-A, S5:OT, S5:OT-A                           |
| 172 | Yes         | 9       | 9-A  | 1000   | McF_4 | 0   | unif   | singleC     | J1:DiP, J1:DiP-A, J1:OT, J1:OT-A, J5:DiP, J5:DiP-A, J5:OT, J5:OT-A, S1:DiP, S1:DiP-A, S1:OT, S1:OT-A, S5:DiP, S5:DiP-A, S5:OT, S5:OT-A                   |
| 173 | Yes         | 9       | 9-A  | 1000   | McF_4 | 0   | unif   | wholeT_0.01 | J1:CBN-A, J1:DiP, J1:DiP-A, J1:OT, J1:OT-A, J5:DiP, J5:DiP-A, J5:OT, J5:OT-A, S1:DiP-A, S5:DiP, S5:DiP-A, S5:OT, S5:OT-A                                 |
| 174 | Yes         | 9       | 9-A  | 1000   | McF_4 | 0   | unif   | wholeT_0.5  | J1:DiP, J1:DiP-A, J1:OT, J1:OT-A, J5:DiP, J5:OT, J5:OT-A, S1:DiP, S1:DiP-A, S1:OT, S1:OT-A, S5:DiP, S5:DiP-A, S5:OT, S5:OT-A                             |

Table 16: (continued)

|     | Conjunction | Drivers | Tree | S.Size | Model | sh  | S.Time | S.Type      | Best method(s)                                                                                                                                                                                         |
|-----|-------------|---------|------|--------|-------|-----|--------|-------------|--------------------------------------------------------------------------------------------------------------------------------------------------------------------------------------------------------|
| 175 | Yes         | 9       | 9-A  | 1000   | McF_4 | Inf | last   | singleC     | J1:DiP, J1:DiP-A, J1:OT, J1:OT-A, J5:DiP, J5:DiP-A, J5:OT, J5:OT-A, S1:OT-A, S5:DiP, S5:DiP-A, S5:OT, S5:OT-A                                                                                          |
| 176 | Yes         | 9       | 9-A  | 1000   | McF_4 | Inf | last   | wholeT_0.01 | J1:DiP, J1:OT, J5:DiP, J5:OT, S1:DiP, S5:DiP, S5:OT                                                                                                                                                    |
| 177 | Yes         | 9       | 9-A  | 1000   | McF_4 | Inf | last   | wholeT_0.5  | J1:DiP, J1:DiP-A, J1:OT, J1:OT-A, J5:DiP, J5:DiP-A, J5:OT, J5:OT-A, S1:DiP, S1:DiP-A, S1:OT, S1:OT-A, S5:DiP, S5:OT, S5:OT-A                                                                           |
| 178 | Yes         | 9       | 9-A  | 1000   | McF_4 | Inf | unif   | singleC     | J1:DiP, J1:DiP-A, J1:OT, J1:OT-A, J5:DiP, J5:DiP-A, J5:OT, J5:OT-A, S1:DiP, S1:OT, S1:OT-A, S5:DiP, S5:DiP-A, S5:OT, S5:OT-A                                                                           |
| 179 | Yes         | 9       | 9-A  | 1000   | McF_4 | Inf | unif   | wholeT_0.01 | J1:DiP, J1:DiP-A, J1:OT, J1:OT-A, J5:DiP, J5:DiP-A, J5:OT, J5:OT-A, S5:CBN-A, S5:DiP, S5:DiP-A, S5:OT, S5:OT-A                                                                                         |
| 180 | Yes         | 9       | 9-A  | 1000   | McF_4 | Inf | unif   | wholeT_0.5  | J1:DiP, J1:DiP-A, J1:OT, J1:OT-A, J5:DiP, J5:DiP-A, J5:OT, J5:OT-A, S1:DiP, S1:DiP-A, S1:OT, S1:OT-A, S5:DiP, S5:DiP-A, S5:OT, S5:OT-A                                                                 |
| 181 | Yes         | 9       | 9-A  | 1000   | McF_6 | 0   | last   | singleC     | J1:DiP, J1:OT, J5:DiP, J5:OT, S1:DiP, S5:DiP, S5:OT                                                                                                                                                    |
| 182 | Yes         | 9       | 9-A  | 1000   | McF_6 | 0   | last   | wholeT_0.01 | J1:DiP, J1:OT, J5:DiP, J5:OT, S1:DiP, S5:DiP, S5:OT                                                                                                                                                    |
| 183 | Yes         | 9       | 9-A  | 1000   | McF_6 | 0   | last   | wholeT_0.5  | J1:DiP, J1:OT, J5:DiP, J5:OT, S1:DiP, S1:OT, S5:DiP, S5:OT                                                                                                                                             |
| 184 | Yes         | 9       | 9-A  | 1000   | McF_6 | 0   | unif   | singleC     | J1:CBN, J1:CBN-A, J1:DiP, J1:DiP-A, J1:OT, J1:OT-A, J5:CBN, J5:CBN-A, J5:DiP, J5:DiP-A, J5:OT, J5:OT-A, S1:CBN-A, S1:DiP, S1:DiP-A, S1:OT, S1:OT-A, S5:CBN, S5:CBN-A, S5:DiP, S5:DiP-A, S5:OT, S5:OT-A |
| 185 | Yes         | 9       | 9-A  | 1000   | McF_6 | 0   | unif   | wholeT_0.01 | J1:CBN, J1:CBN-A, J1:DiP, J1:DiP-A, J1:OT, J1:OT-A, J5:CBN, J5:CBN-A, J5:DiP, J5:DiP-A, J5:OT, J5:OT-A, S1:DiP, S5:CBN, S5:CBN-A, S5:DiP, S5:DiP-A, S5:OT, S5:OT-A                                     |

Table 16: (continued)

|     | Conjunction | Drivers | Tree | S.Size | Model | sh  | S.Time | S.Type      | Best method(s)                                                                                                                                                                               |
|-----|-------------|---------|------|--------|-------|-----|--------|-------------|----------------------------------------------------------------------------------------------------------------------------------------------------------------------------------------------|
| 186 | Yes         | 9       | 9-A  | 1000   | McF_6 | 0   | unif   | wholeT_0.5  | J1:CBN, J1:CBN-A, J1:DiP, J1:DiP-A, J1:OT, J1:OT-A, J5:CBN, J5:CBN-A, J5:DiP, J5:DiP-A, J5:OT, J5:OT-A, S1:CBN-A, S1:DiP, S1:DiP-A, S1:OT, S1:OT-A, S5:CBN, S5:CBN-A, S5:DiP, S5:OT, S5:OT-A |
| 187 | Yes         | 9       | 9-A  | 1000   | McF_6 | Inf | last   | singleC     | J1:DiP, J1:OT, J5:DiP, J5:OT, S1:DiP, S5:DiP, S5:OT                                                                                                                                          |
| 188 | Yes         | 9       | 9-A  | 1000   | McF_6 | Inf | last   | wholeT_0.01 | J1:DiP, J1:OT, J5:DiP, J5:OT, S5:OT                                                                                                                                                          |
| 189 | Yes         | 9       | 9-A  | 1000   | McF_6 | Inf | last   | wholeT_0.5  | J1:DiP, J1:OT, J5:DiP, J5:OT, S1:DiP, S5:DiP, S5:OT                                                                                                                                          |
| 190 | Yes         | 9       | 9-A  | 1000   | McF_6 | Inf | unif   | singleC     | J1:CBN, J1:CBN-A, J1:DiP, J1:DiP-A, J1:OT, J1:OT-A, J5:CBN, J5:CBN-A, J5:DiP, J5:DiP-A, J5:OT, J5:OT-A, S1:DiP, S1:OT, S1:OT-A, S5:CBN, S5:CBN-A, S5:DiP, S5:DiP-A, S5:OT, S5:OT-A           |
| 191 | Yes         | 9       | 9-A  | 1000   | McF_6 | Inf | unif   | wholeT_0.01 | J1:CBN, J1:CBN-A, J1:DiP, J1:DiP-A, J1:OT, J1:OT-A, J5:CBN-A, J5:DiP, J5:DiP-A, J5:OT, J5:OT-A, S1:DiP, S1:DiP-A, S5:CBN, S5:CBN-A, S5:DiP, S5:DiP-A, S5:OT, S5:OT-A                         |
| 192 | Yes         | 9       | 9-A  | 1000   | McF_6 | Inf | unif   | wholeT_0.5  | J1:CBN, J1:CBN-A, J1:DiP, J1:DiP-A, J1:OT, J1:OT-A, J5:CBN, J5:CBN-A, J5:DiP, J5:DiP-A, J5:OT, J5:OT-A, S1:DiP, S1:DiP-A, S1:OT, S1:OT-A, S5:CBN, S5:CBN-A, S5:DiP, S5:DiP-A, S5:OT, S5:OT-A |
| 193 | Yes         | 9       | 9-A  | 200    | Bozic | 0   | last   | singleC     | J1:DiP, J1:DiP-A, J1:OT, J1:OT-A, J5:DiP-A, J5:OT, J5:OT-A, S1:DiP, S1:OT-A, S5:DiP, S5:DiP-A, S5:OT, S5:OT-A                                                                                |
| 194 | Yes         | 9       | 9-A  | 200    | Bozic | 0   | last   | wholeT_0.01 | J1:DiP, J1:DiP-A, J1:OT, J1:OT-A, J5:DiP, J5:DiP-A, J5:OT, J5:OT-A, S1:DiP, S1:DiP-A, S5:DiP, S5:DiP-A, S5:OT, S5:OT-A                                                                       |
| 195 | Yes         | 9       | 9-A  | 200    | Bozic | 0   | last   | wholeT_0.5  | J1:DiP, J1:DiP-A, J1:OT, J1:OT-A, J5:DiP, J5:DiP-A, J5:OT, J5:OT-A, S1:DiP, S1:DiP-A, S5:DiP, S5:DiP-A, S5:OT, S5:OT-A                                                                       |



Table 16: (continued)

|     | Conjunction | Drivers | Tree | S.Size | Model | sh  | S.Time | S.Type      | Best method(s)                                                                                                                                           |
|-----|-------------|---------|------|--------|-------|-----|--------|-------------|----------------------------------------------------------------------------------------------------------------------------------------------------------|
| 196 | Yes         | 9       | 9-A  | 200    | Bozic | 0   | unif   | singleC     | J1:DiP, J1:DiP-A, J1:OT, J1:OT-A, J5:CBN, J5:CBN-A, J5:DiP, J5:DiP-A, J5:OT, J5:OT-A, S1:DiP, S1:DiP-A, S1:OT, S1:OT-A, S5:DiP, S5:DiP-A, S5:OT, S5:OT-A |
| 197 | Yes         | 9       | 9-A  | 200    | Bozic | 0   | unif   | wholeT_0.01 | J1:DiP, J1:DiP-A, J1:OT, J1:OT-A, J5:DiP-A, J5:OT, J5:OT-A, S5:DiP, S5:DiP-A, S5:OT, S5:OT-A                                                             |
| 198 | Yes         | 9       | 9-A  | 200    | Bozic | 0   | unif   | wholeT_0.5  | J1:DiP, J1:DiP-A, J1:OT, J1:OT-A, J5:CBN, J5:CBN-A, J5:DiP, J5:DiP-A, J5:OT, J5:OT-A, S1:DiP-A, S1:OT, S1:OT-A, S5:DiP, S5:DiP-A, S5:OT, S5:OT-A         |
| 199 | Yes         | 9       | 9-A  | 200    | Bozic | Inf | last   | singleC     | J1:DiP, J1:DiP-A, J5:DiP, J5:DiP-A, J5:OT, J5:OT-A, S5:DiP-A, S5:OT-A                                                                                    |
| 200 | Yes         | 9       | 9-A  | 200    | Bozic | Inf | last   | wholeT_0.01 | J5:DiP, J5:DiP-A, J5:OT, J5:OT-A                                                                                                                         |
| 201 | Yes         | 9       | 9-A  | 200    | Bozic | Inf | last   | wholeT_0.5  | J1:DiP, J1:DiP-A, J5:DiP, J5:DiP-A, J5:OT, J5:OT-A, S5:DiP                                                                                               |
| 202 | Yes         | 9       | 9-A  | 200    | Bozic | Inf | unif   | singleC     | J1:DiP, J1:DiP-A, J1:OT, J1:OT-A, J5:DiP, J5:DiP-A, J5:OT, J5:OT-A, S5:DiP, S5:DiP-A, S5:OT, S5:OT-A                                                     |
| 203 | Yes         | 9       | 9-A  | 200    | Bozic | Inf | unif   | wholeT_0.01 | J5:DiP, J5:DiP-A, J5:OT, J5:OT-A, S5:OT, S5:OT-A                                                                                                         |
| 204 | Yes         | 9       | 9-A  | 200    | Bozic | Inf | unif   | wholeT_0.5  | J1:DiP, J1:DiP-A, J1:OT, J1:OT-A, J5:DiP, J5:DiP-A, J5:OT, J5:OT-A, S5:DiP, S5:DiP-A, S5:OT, S5:OT-A                                                     |
| 205 | Yes         | 9       | 9-A  | 200    | exp   | 0   | last   | singleC     | J1:DiP, J1:DiP-A, J1:OT, J1:OT-A, J5:CBN, J5:CBN-A, J5:DiP, J5:DiP-A, J5:OT, J5:OT-A, S1:DiP, S1:DiP-A, S1:OT, S1:OT-A, S5:DiP, S5:DiP-A, S5:OT, S5:OT-A |
| 206 | Yes         | 9       | 9-A  | 200    | exp   | 0   | last   | wholeT_0.01 | J1:DiP, J1:DiP-A, J1:OT, J1:OT-A, J5:DiP, J5:DiP-A, J5:OT, J5:OT-A, S1:DiP, S1:DiP-A, S1:OT, S5:DiP, S5:DiP-A, S5:OT, S5:OT-A                            |
| 207 | Yes         | 9       | 9-A  | 200    | exp   | 0   | last   | wholeT_0.5  | J1:DiP, J1:DiP-A, J1:OT, J1:OT-A, J5:CBN, J5:CBN-A, J5:DiP, J5:DiP-A, J5:OT, J5:OT-A, S1:DiP, S1:DiP-A, S1:OT, S1:OT-A, S5:DiP, S5:DiP-A, S5:OT, S5:OT-A |

Table 16: (continued)

|     | Conjunction | Drivers | Tree | S.Size | Model | sh  | S.Time | S.Type      | Best method(s)                                                                                                                                                             |
|-----|-------------|---------|------|--------|-------|-----|--------|-------------|----------------------------------------------------------------------------------------------------------------------------------------------------------------------------|
| 208 | Yes         | 9       | 9-A  | 200    | exp   | 0   | unif   | singleC     | J1:CBN, J1:DiP, J1:DiP-A, J1:OT, J1:OT-A, J5:CBN, J5:CBN-A, J5:DiP, J5:DiP-A, J5:OT, J5:OT-A, S1:DiP, S1:DiP-A, S1:OT, S1:OT-A, S5:DiP, S5:DiP-A, S5:OT, S5:OT-A           |
| 209 | Yes         | 9       | 9-A  | 200    | exp   | 0   | unif   | wholeT_0.01 | J1:DiP, J1:DiP-A, J1:OT, J1:OT-A, J5:CBN, J5:CBN-A, J5:DiP, J5:DiP-A, J5:OT, J5:OT-A, S1:DiP, S1:DiP-A, S1:OT-A, S5:DiP, S5:DiP-A, S5:OT, S5:OT-A                          |
| 210 | Yes         | 9       | 9-A  | 200    | exp   | 0   | unif   | wholeT_0.5  | J1:CBN, J1:CBN-A, J1:DiP, J1:DiP-A, J1:OT, J1:OT-A, J5:CBN, J5:CBN-A, J5:DiP, J5:DiP-A, J5:OT, J5:OT-A, S1:DiP, S1:DiP-A, S1:OT, S1:OT-A, S5:DiP, S5:DiP-A, S5:OT, S5:OT-A |
| 211 | Yes         | 9       | 9-A  | 200    | exp   | Inf | last   | singleC     | J1:DiP, J1:DiP-A, J1:OT, J5:DiP, J5:OT, J5:OT-A, S1:DiP, S5:DiP, S5:DiP-A, S5:OT, S5:OT-A                                                                                  |
| 212 | Yes         | 9       | 9-A  | 200    | exp   | Inf | last   | wholeT_0.01 | J5:DiP, J5:DiP-A, J5:OT, J5:OT-A                                                                                                                                           |
| 213 | Yes         | 9       | 9-A  | 200    | exp   | Inf | last   | wholeT_0.5  | J1:DiP, J1:DiP-A, J1:OT, J1:OT-A, J5:DiP, J5:DiP-A, J5:OT, J5:OT-A, S1:DiP, S1:DiP-A, S5:DiP, S5:DiP-A, S5:OT, S5:OT-A                                                     |
| 214 | Yes         | 9       | 9-A  | 200    | exp   | Inf | unif   | singleC     | J1:DiP, J1:DiP-A, J1:OT, J1:OT-A, J5:CBN-A, J5:DiP, J5:DiP-A, J5:OT, J5:OT-A, S1:DiP-A, S5:DiP, S5:DiP-A, S5:OT, S5:OT-A                                                   |
| 215 | Yes         | 9       | 9-A  | 200    | exp   | Inf | unif   | wholeT_0.01 | J5:DiP, J5:DiP-A, J5:OT, J5:OT-A, S5:DiP, S5:DiP-A, S5:OT, S5:OT-A                                                                                                         |
| 216 | Yes         | 9       | 9-A  | 200    | exp   | Inf | unif   | wholeT_0.5  | J1:DiP, J1:DiP-A, J1:OT, J1:OT-A, J5:CBN, J5:CBN-A, J5:DiP, J5:DiP-A, J5:OT, J5:OT-A, S1:DiP, S1:DiP-A, S5:DiP, S5:DiP-A, S5:OT, S5:OT-A                                   |
| 217 | Yes         | 9       | 9-A  | 200    | McF_4 | 0   | last   | singleC     | J1:DiP, J1:DiP-A, J1:OT, J1:OT-A, J5:DiP, J5:DiP-A, J5:OT, J5:OT-A, S5:DiP, S5:DiP-A, S5:OT, S5:OT-A                                                                       |
| 218 | Yes         | 9       | 9-A  | 200    | McF_4 | 0   | last   | wholeT_0.01 | J1:DiP, J1:DiP-A, J1:OT-A, J5:DiP, J5:DiP-A, J5:OT, J5:OT-A, S1:DiP, S1:DiP-A, S5:DiP, S5:DiP-A, S5:OT, S5:OT-A                                                            |

Table 16: (continued)

|     | Conjunction | Drivers | Tree | S.Size | Model | sh  | S.Time | S.Type      | Best method(s)                                                                                                                   |
|-----|-------------|---------|------|--------|-------|-----|--------|-------------|----------------------------------------------------------------------------------------------------------------------------------|
| 219 | Yes         | 9       | 9-A  | 200    | McF_4 | 0   | last   | wholeT_0.5  | J1:DiP, J1:DiP-A, J1:OT-A, J5:DiP, J5:DiP-A, J5:OT-A, S5:DiP, S5:OT, S5:OT-A                                                     |
| 220 | Yes         | 9       | 9-A  | 200    | McF_4 | 0   | unif   | singleC     | J1:DiP, J1:DiP-A, J1:OT-A, J5:DiP, J5:DiP-A, J5:OT, J5:OT-A, S1:DiP, S5:DiP, S5:DiP-A, S5:OT, S5:OT-A                            |
| 221 | Yes         | 9       | 9-A  | 200    | McF_4 | 0   | unif   | wholeT_0.01 | J1:DiP, J1:DiP-A, J1:OT, J1:OT-A, J5:DiP, J5:DiP-A, J5:OT, J5:OT-A, S1:DiP, S1:DiP-A, S5:DiP, S5:DiP-A, S5:OT, S5:OT-A           |
| 222 | Yes         | 9       | 9-A  | 200    | McF_4 | 0   | unif   | wholeT_0.5  | J1:DiP, J1:DiP-A, J1:OT, J1:OT-A, J5:DiP, J5:DiP-A, J5:OT, J5:OT-A, S1:DiP, S1:DiP-A, S5:DiP, S5:DiP-A, S5:OT-A                  |
| 223 | Yes         | 9       | 9-A  | 200    | McF_4 | Inf | last   | singleC     | J1:DiP, J1:DiP-A, J5:DiP, J5:DiP-A, J5:OT, J5:OT-A, S5:DiP, S5:OT, S5:OT-A                                                       |
| 224 | Yes         | 9       | 9-A  | 200    | McF_4 | Inf | last   | wholeT_0.01 | J1:DiP, J1:DiP-A, J5:DiP, J5:DiP-A, J5:OT, S1:DiP, S5:DiP, S5:DiP-A, S5:OT                                                       |
| 225 | Yes         | 9       | 9-A  | 200    | McF_4 | Inf | last   | wholeT_0.5  | J1:DiP, J1:DiP-A, J1:OT, J1:OT-A, J5:DiP, J5:DiP-A, J5:OT, J5:OT-A, S1:DiP, S1:DiP-A, S5:DiP, S5:DiP-A, S5:OT, S5:OT-A           |
| 226 | Yes         | 9       | 9-A  | 200    | McF_4 | Inf | unif   | singleC     | J1:DiP, J1:DiP-A, J1:OT, J1:OT-A, J5:DiP, J5:DiP-A, J5:OT, J5:OT-A, S1:DiP-A, S5:DiP, S5:DiP-A, S5:OT, S5:OT-A                   |
| 227 | Yes         | 9       | 9-A  | 200    | McF_4 | Inf | unif   | wholeT_0.01 | J1:DiP, J1:DiP-A, J1:OT, J5:DiP, J5:DiP-A, J5:OT, J5:OT-A, S1:DiP, S1:DiP-A, S5:DiP, S5:DiP-A, S5:OT, S5:OT-A                    |
| 228 | Yes         | 9       | 9-A  | 200    | McF_4 | Inf | unif   | wholeT_0.5  | J1:DiP, J1:DiP-A, J1:OT, J1:OT-A, J5:DiP, J5:DiP-A, J5:OT, J5:OT-A, S1:DiP, S1:DiP-A, S5:CBN-A, S5:DiP, S5:DiP-A, S5:OT, S5:OT-A |
| 229 | Yes         | 9       | 9-A  | 200    | McF_6 | 0   | last   | singleC     | J1:DiP, J5:DiP, J5:OT, S1:DiP, S5:DiP, S5:OT                                                                                     |
| 230 | Yes         | 9       | 9-A  | 200    | McF_6 | 0   | last   | wholeT_0.01 | J1:DiP, J5:DiP, J5:OT, S5:DiP, S5:OT                                                                                             |
| 231 | Yes         | 9       | 9-A  | 200    | McF_6 | 0   | last   | wholeT_0.5  | J1:DiP, J1:OT, J5:DiP, J5:OT, S1:DiP, S5:DiP, S5:OT                                                                              |

Table 16: (continued)

|     | Conjunction | Drivers | Tree | S.Size | Model | sh  | S.Time | S.Type      | Best method(s)                                                                                                                                                               |
|-----|-------------|---------|------|--------|-------|-----|--------|-------------|------------------------------------------------------------------------------------------------------------------------------------------------------------------------------|
| 232 | Yes         | 9       | 9-A  | 200    | McF_6 | 0   | unif   | singleC     | J1:CBN, J1:CBN-A, J1:DiP, J1:DiP-A, J1:OT, J1:OT-A, J5:CBN, J5:CBN-A, J5:DiP, J5:DiP-A, J5:OT, J5:OT-A, S1:DiP, S1:DiP-A, S5:CBN, S5:CBN-A, S5:DiP, S5:DiP-A, S5:OT, S5:OT-A |
| 233 | Yes         | 9       | 9-A  | 200    | McF_6 | 0   | unif   | wholeT_0.01 | J1:CBN, J1:CBN-A, J1:DiP, J1:DiP-A, J1:OT, J1:OT-A, J5:CBN, J5:CBN-A, J5:DiP, J5:DiP-A, J5:OT, J5:OT-A, S1:DiP-A, S5:CBN, S5:DiP, S5:DiP-A, S5:OT-A                          |
| 234 | Yes         | 9       | 9-A  | 200    | McF_6 | 0   | unif   | wholeT_0.5  | J1:CBN, J1:CBN-A, J1:DiP, J1:DiP-A, J1:OT, J1:OT-A, J5:CBN, J5:CBN-A, J5:DiP, J5:DiP-A, J5:OT, J5:OT-A, S1:DiP-A, S5:CBN, S5:CBN-A, S5:DiP, S5:DiP-A, S5:OT, S5:OT-A         |
| 235 | Yes         | 9       | 9-A  | 200    | McF_6 | Inf | last   | singleC     | J1:DiP, J5:OT, S5:DiP, S5:OT                                                                                                                                                 |
| 236 | Yes         | 9       | 9-A  | 200    | McF_6 | Inf | last   | wholeT_0.01 | J1:DiP, J5:DiP, J5:OT, S5:DiP, S5:OT                                                                                                                                         |
| 237 | Yes         | 9       | 9-A  | 200    | McF_6 | Inf | last   | wholeT_0.5  | J1:DiP, J1:OT, J5:DiP, J5:OT, S1:DiP, S5:DiP, S5:OT                                                                                                                          |
| 238 | Yes         | 9       | 9-A  | 200    | McF_6 | Inf | unif   | singleC     | J1:CBN, J1:CBN-A, J1:DiP, J1:DiP-A, J1:OT, J1:OT-A, J5:CBN, J5:CBN-A, J5:DiP, J5:DiP-A, J5:OT, J5:OT-A, S1:DiP, S1:DiP-A, S5:CBN, S5:CBN-A, S5:DiP, S5:DiP-A, S5:OT, S5:OT-A |
| 239 | Yes         | 9       | 9-A  | 200    | McF_6 | Inf | unif   | wholeT_0.01 | J1:CBN, J1:CBN-A, J1:DiP, J1:DiP-A, J1:OT-A, J5:CBN, J5:CBN-A, J5:DiP, J5:DiP-A, J5:OT, J5:OT-A, S1:DiP, S5:CBN, S5:OT, S5:OT-A                                              |
| 240 | Yes         | 9       | 9-A  | 200    | McF_6 | Inf | unif   | wholeT_0.5  | J1:CBN, J1:CBN-A, J1:DiP, J1:DiP-A, J1:OT, J1:OT-A, J5:CBN, J5:CBN-A, J5:DiP, J5:DiP-A, J5:OT, J5:OT-A, S1:DiP, S1:DiP-A, S5:CBN, S5:CBN-A, S5:DiP, S5:DiP-A, S5:OT, S5:OT-A |
| 241 | Yes         | 9       | 9-A  | 100    | Bozic | 0   | last   | singleC     | J1:DiP, J1:DiP-A, J1:OT, J1:OT-A, J5:DiP, J5:DiP-A, J5:OT, J5:OT-A, S1:DiP, S1:DiP-A, S5:DiP, S5:DiP-A, S5:OT, S5:OT-A                                                       |
| 242 | Yes         | 9       | 9-A  | 100    | Bozic | 0   | last   | wholeT_0.01 | J1:DiP, J1:DiP-A, J5:DiP, J5:DiP-A, J5:OT, J5:OT-A, S1:DiP, S1:DiP-A, S5:DiP, S5:DiP-A, S5:OT, S5:OT-A                                                                       |

Table 16: (continued)

|     | Conjunction | Drivers | Tree | S.Size | Model | sh  | S.Time | S.Type      | Best method(s)                                                                                                                           |
|-----|-------------|---------|------|--------|-------|-----|--------|-------------|------------------------------------------------------------------------------------------------------------------------------------------|
| 243 | Yes         | 9       | 9-A  | 100    | Bozic | 0   | last   | wholeT_0.5  | J1:DiP, J1:DiP-A, J1:OT, J1:OT-A, J5:DiP, J5:DiP-A, J5:OT, J5:OT-A, S1:DiP, S1:DiP-A, S5:DiP, S5:DiP-A, S5:OT, S5:OT-A                   |
| 244 | Yes         | 9       | 9-A  | 100    | Bozic | 0   | unif   | singleC     | J1:DiP, J1:DiP-A, J5:CBN, J5:CBN-A, J5:DiP, J5:DiP-A, J5:OT, J5:OT-A, S1:DiP, S1:DiP-A, S5:DiP-A, S5:OT, S5:OT-A                         |
| 245 | Yes         | 9       | 9-A  | 100    | Bozic | 0   | unif   | wholeT_0.01 | J1:DiP, J1:DiP-A, J1:OT, J5:DiP, J5:DiP-A, J5:OT, J5:OT-A, S1:DiP, S1:DiP-A, S5:DiP, S5:DiP-A, S5:OT, S5:OT-A                            |
| 246 | Yes         | 9       | 9-A  | 100    | Bozic | 0   | unif   | wholeT_0.5  | J1:DiP, J1:DiP-A, J1:OT, J1:OT-A, J5:CBN, J5:CBN-A, J5:DiP, J5:DiP-A, J5:OT, J5:OT-A, S1:DiP, S1:DiP-A, S5:DiP, S5:DiP-A, S5:OT, S5:OT-A |
| 247 | Yes         | 9       | 9-A  | 100    | Bozic | Inf | last   | singleC     | J1:DiP, J1:DiP-A, J5:DiP, J5:DiP-A, J5:OT, J5:OT-A, S1:DiP, S1:DiP-A, S5:DiP, S5:DiP-A                                                   |
| 248 | Yes         | 9       | 9-A  | 100    | Bozic | Inf | last   | wholeT_0.01 | J5:DiP, J5:DiP-A                                                                                                                         |
| 249 | Yes         | 9       | 9-A  | 100    | Bozic | Inf | last   | wholeT_0.5  | J1:DiP, J1:DiP-A, J5:DiP, J5:DiP-A, J5:OT, J5:OT-A, S1:DiP, S1:DiP-A, S5:DiP, S5:DiP-A                                                   |
| 250 | Yes         | 9       | 9-A  | 100    | Bozic | Inf | unif   | singleC     | J1:DiP, J1:DiP-A, J5:DiP, J5:DiP-A, J5:OT, J5:OT-A, S1:DiP, S5:DiP, S5:DiP-A, S5:OT, S5:OT-A                                             |
| 251 | Yes         | 9       | 9-A  | 100    | Bozic | Inf | unif   | wholeT_0.01 | J5:DiP, J5:DiP-A, J5:OT, J5:OT-A                                                                                                         |
| 252 | Yes         | 9       | 9-A  | 100    | Bozic | Inf | unif   | wholeT_0.5  | J1:DiP, J1:DiP-A, J5:DiP, J5:DiP-A, J5:OT, J5:OT-A, S5:DiP, S5:DiP-A, S5:OT, S5:OT-A                                                     |
| 253 | Yes         | 9       | 9-A  | 100    | exp   | 0   | last   | singleC     | J1:DiP, J1:DiP-A, J1:OT, J1:OT-A, J5:CBN, J5:CBN-A, J5:DiP, J5:DiP-A, J5:OT, J5:OT-A, S1:DiP, S1:DiP-A, S5:DiP, S5:DiP-A, S5:OT, S5:OT-A |
| 254 | Yes         | 9       | 9-A  | 100    | exp   | 0   | last   | wholeT_0.01 | J1:DiP, J1:DiP-A, J1:OT, J1:OT-A, J5:DiP, J5:DiP-A, J5:OT, J5:OT-A, S1:DiP, S1:DiP-A, S5:DiP, S5:DiP-A, S5:OT, S5:OT-A                   |

Table 16: (continued)

|     | Conjunction | Drivers | Tree | S.Size | Model | sh  | S.Time | S.Type      | Best method(s)                                                                                                                                           |
|-----|-------------|---------|------|--------|-------|-----|--------|-------------|----------------------------------------------------------------------------------------------------------------------------------------------------------|
| 255 | Yes         | 9       | 9-A  | 100    | exp   | 0   | last   | wholeT_0.5  | J1:DiP, J1:DiP-A, J1:OT, J1:OT-A, J5:CBN, J5:CBN-A, J5:DiP, J5:DiP-A, J5:OT, J5:OT-A, S1:DiP, S1:DiP-A, S5:DiP, S5:DiP-A, S5:OT, S5:OT-A                 |
| 256 | Yes         | 9       | 9-A  | 100    | exp   | 0   | unif   | singleC     | J1:DiP, J1:DiP-A, J1:OT, J1:OT-A, J5:CBN, J5:CBN-A, J5:DiP, J5:DiP-A, J5:OT, J5:OT-A, S1:DiP, S1:DiP-A, S1:OT, S1:OT-A, S5:DiP, S5:DiP-A, S5:OT, S5:OT-A |
| 257 | Yes         | 9       | 9-A  | 100    | exp   | 0   | unif   | wholeT_0.01 | J1:DiP, J1:DiP-A, J1:OT, J1:OT-A, J5:CBN, J5:CBN-A, J5:DiP, J5:DiP-A, J5:OT, J5:OT-A, S1:DiP, S5:DiP, S5:DiP-A, S5:OT, S5:OT-A                           |
| 258 | Yes         | 9       | 9-A  | 100    | exp   | 0   | unif   | wholeT_0.5  | J1:DiP, J1:DiP-A, J1:OT, J1:OT-A, J5:CBN, J5:CBN-A, J5:DiP, J5:DiP-A, J5:OT, J5:OT-A, S1:DiP, S1:DiP-A, S1:OT, S1:OT-A, S5:DiP, S5:DiP-A, S5:OT, S5:OT-A |
| 259 | Yes         | 9       | 9-A  | 100    | exp   | Inf | last   | singleC     | J1:DiP, J1:DiP-A, J5:DiP, J5:DiP-A, J5:OT, J5:OT-A, S1:DiP, S1:DiP-A, S5:DiP, S5:DiP-A, S5:OT, S5:OT-A                                                   |
| 260 | Yes         | 9       | 9-A  | 100    | exp   | Inf | last   | wholeT_0.01 | J5:DiP, J5:DiP-A, J5:OT, J5:OT-A                                                                                                                         |
| 261 | Yes         | 9       | 9-A  | 100    | exp   | Inf | last   | wholeT_0.5  | J1:DiP, J1:DiP-A, J5:DiP, J5:DiP-A, J5:OT, J5:OT-A, S1:DiP, S1:DiP-A, S5:DiP, S5:DiP-A, S5:OT, S5:OT-A                                                   |
| 262 | Yes         | 9       | 9-A  | 100    | exp   | Inf | unif   | singleC     | J1:DiP, J1:DiP-A, J1:OT-A, J5:CBN-A, J5:DiP, J5:DiP-A, J5:OT, J5:OT-A, S1:DiP, S1:DiP-A, S5:DiP, S5:DiP-A, S5:OT, S5:OT-A                                |
| 263 | Yes         | 9       | 9-A  | 100    | exp   | Inf | unif   | wholeT_0.01 | J5:DiP, J5:DiP-A, J5:OT, J5:OT-A, S5:DiP, S5:DiP-A, S5:OT, S5:OT-A                                                                                       |
| 264 | Yes         | 9       | 9-A  | 100    | exp   | Inf | unif   | wholeT_0.5  | J1:DiP, J1:DiP-A, J5:CBN, J5:CBN-A, J5:DiP, J5:DiP-A, J5:OT, J5:OT-A, S1:DiP, S1:DiP-A, S5:DiP, S5:DiP-A, S5:OT, S5:OT-A                                 |
| 265 | Yes         | 9       | 9-A  | 100    | McF_4 | 0   | last   | singleC     | J1:DiP, J1:DiP-A, J5:DiP, J5:DiP-A, J5:OT, J5:OT-A, S1:DiP, S1:DiP-A, S5:DiP, S5:DiP-A, S5:OT, S5:OT-A                                                   |

Table 16: (continued)

|     | Conjunction | Drivers | Tree | S.Size | Model | sh  | S.Time | S.Type      | Best method(s)                                                                                                         |
|-----|-------------|---------|------|--------|-------|-----|--------|-------------|------------------------------------------------------------------------------------------------------------------------|
| 266 | Yes         | 9       | 9-A  | 100    | McF_4 | 0   | last   | wholeT_0.01 | J1:DiP, J1:DiP-A, J5:DiP, J5:DiP-A, J5:OT, J5:OT-A, S1:DiP, S5:DiP, S5:DiP-A, S5:OT, S5:OT-A                           |
| 267 | Yes         | 9       | 9-A  | 100    | McF_4 | 0   | last   | wholeT_0.5  | J1:DiP, J1:DiP-A, J5:DiP, J5:DiP-A, J5:OT, J5:OT-A, S1:DiP, S1:DiP-A, S5:DiP, S5:DiP-A, S5:OT, S5:OT-A                 |
| 268 | Yes         | 9       | 9-A  | 100    | McF_4 | 0   | unif   | singleC     | J1:DiP, J1:DiP-A, J5:DiP, J5:DiP-A, J5:OT, J5:OT-A, S1:DiP, S1:DiP-A, S5:DiP, S5:DiP-A, S5:OT, S5:OT-A                 |
| 269 | Yes         | 9       | 9-A  | 100    | McF_4 | 0   | unif   | wholeT_0.01 | J1:DiP, J1:DiP-A, J5:DiP, J5:DiP-A, J5:OT, J5:OT-A, S5:DiP, S5:DiP-A, S5:OT, S5:OT-A                                   |
| 270 | Yes         | 9       | 9-A  | 100    | McF_4 | 0   | unif   | wholeT_0.5  | J1:DiP, J1:DiP-A, J1:OT, J1:OT-A, J5:DiP, J5:DiP-A, J5:OT, J5:OT-A, S1:DiP, S1:DiP-A, S5:DiP, S5:DiP-A, S5:OT, S5:OT-A |
| 271 | Yes         | 9       | 9-A  | 100    | McF_4 | Inf | last   | singleC     | J1:DiP, J1:DiP-A, J5:DiP, J5:DiP-A, J5:OT, J5:OT-A, S1:DiP-A, S5:DiP, S5:DiP-A, S5:OT, S5:OT-A                         |
| 272 | Yes         | 9       | 9-A  | 100    | McF_4 | Inf | last   | wholeT_0.01 | J5:DiP, J5:DiP-A, J5:OT, S1:DiP, S5:DiP, S5:OT                                                                         |
| 273 | Yes         | 9       | 9-A  | 100    | McF_4 | Inf | last   | wholeT_0.5  | J1:DiP, J1:DiP-A, J5:DiP, J5:DiP-A, J5:OT, J5:OT-A, S1:DiP, S1:DiP-A, S5:DiP, S5:DiP-A, S5:OT, S5:OT-A                 |
| 274 | Yes         | 9       | 9-A  | 100    | McF_4 | Inf | unif   | singleC     | J1:DiP, J1:DiP-A, J1:OT, J1:OT-A, J5:DiP, J5:DiP-A, J5:OT, J5:OT-A, S1:DiP, S1:DiP-A, S5:DiP, S5:DiP-A, S5:OT, S5:OT-A |
| 275 | Yes         | 9       | 9-A  | 100    | McF_4 | Inf | unif   | wholeT_0.01 | J1:DiP, J1:DiP-A, J5:DiP, J5:DiP-A, J5:OT, J5:OT-A, S5:DiP, S5:DiP-A, S5:OT, S5:OT-A                                   |
| 276 | Yes         | 9       | 9-A  | 100    | McF_4 | Inf | unif   | wholeT_0.5  | J1:DiP, J1:DiP-A, J1:OT, J1:OT-A, J5:DiP, J5:DiP-A, J5:OT, J5:OT-A, S1:DiP, S1:DiP-A, S5:DiP, S5:DiP-A, S5:OT, S5:OT-A |
| 277 | Yes         | 9       | 9-A  | 100    | McF_6 | 0   | last   | singleC     | J1:DiP, J5:DiP, J5:OT, S1:DiP, S5:DiP, S5:DiP-A, S5:OT                                                                 |
| 278 | Yes         | 9       | 9-A  | 100    | McF_6 | 0   | last   | wholeT_0.01 | J1:DiP, J5:DiP, J5:OT, S1:DiP, S5:DiP, S5:OT                                                                           |

Table 16: (continued)

|     | Conjunction | Drivers | Tree | S.Size | Model | sh  | S.Time | S.Type      | Best method(s)                                                                                                                                                     |
|-----|-------------|---------|------|--------|-------|-----|--------|-------------|--------------------------------------------------------------------------------------------------------------------------------------------------------------------|
| 279 | Yes         | 9       | 9-A  | 100    | McF_6 | 0   | last   | wholeT_0.5  | J1:DiP, J5:DiP, J5:OT, S1:DiP, S5:DiP, S5:DiP-A, S5:OT                                                                                                             |
| 280 | Yes         | 9       | 9-A  | 100    | McF_6 | 0   | unif   | singleC     | J1:CBN, J1:CBN-A, J1:DiP, J1:DiP-A, J1:OT, J5:CBN, J5:CBN-A, J5:DiP, J5:DiP-A, J5:OT, J5:OT-A, S1:DiP, S1:DiP-A, S5:CBN, S5:CBN-A, S5:DiP, S5:DiP-A, S5:OT         |
| 281 | Yes         | 9       | 9-A  | 100    | McF_6 | 0   | unif   | wholeT_0.01 | J1:DiP, J1:DiP-A, J1:OT-A, J5:CBN, J5:CBN-A, J5:DiP, J5:DiP-A, J5:OT, J5:OT-A, S5:DiP, S5:DiP-A, S5:OT, S5:OT-A                                                    |
| 282 | Yes         | 9       | 9-A  | 100    | McF_6 | 0   | unif   | wholeT_0.5  | J1:CBN, J1:CBN-A, J1:DiP, J1:DiP-A, J1:OT, J5:CBN, J5:CBN-A, J5:DiP, J5:DiP-A, J5:OT, J5:OT-A, S1:DiP, S5:CBN, S5:CBN-A, S5:DiP, S5:DiP-A, S5:OT, S5:OT-A          |
| 283 | Yes         | 9       | 9-A  | 100    | McF_6 | Inf | last   | singleC     | J1:DiP, J5:DiP, J5:OT, S1:DiP, S5:DiP, S5:OT                                                                                                                       |
| 284 | Yes         | 9       | 9-A  | 100    | McF_6 | Inf | last   | wholeT_0.01 | J1:DiP, J5:DiP, J5:OT, S1:DiP, S5:DiP, S5:OT                                                                                                                       |
| 285 | Yes         | 9       | 9-A  | 100    | McF_6 | Inf | last   | wholeT_0.5  | J1:DiP, J5:DiP, J5:DiP-A, J5:OT, S1:DiP, S5:DiP, S5:OT                                                                                                             |
| 286 | Yes         | 9       | 9-A  | 100    | McF_6 | Inf | unif   | singleC     | J1:CBN, J1:CBN-A, J1:DiP, J1:DiP-A, J1:OT-A, J5:CBN, J5:CBN-A, J5:DiP, J5:DiP-A, J5:OT, J5:OT-A, S1:DiP, S5:CBN, S5:CBN-A, S5:DiP, S5:DiP-A, S5:OT, S5:OT-A        |
| 287 | Yes         | 9       | 9-A  | 100    | McF_6 | Inf | unif   | wholeT_0.01 | J1:DiP, J5:CBN-A, J5:DiP, J5:DiP-A, J5:OT, J5:OT-A, S5:CBN, S5:CBN-A, S5:DiP, S5:OT, S5:OT-A                                                                       |
| 288 | Yes         | 9       | 9-A  | 100    | McF_6 | Inf | unif   | wholeT_0.5  | J1:DiP, J1:OT, J5:CBN, J5:CBN-A, J5:DiP, J5:OT, J5:OT-A, S1:DiP, S1:DiP-A, S5:CBN-A, S5:DiP, S5:DiP-A, S5:OT, S5:OT-A                                              |
| 289 | Yes         | 7       | 7-A  | 1000   | Bozic | 0   | last   | singleC     | J1:CBN-A, J1:DiP, J1:DiP-A, J1:OT, J1:OT-A, J5:CBN, J5:CBN-A, J5:DiP, J5:DiP-A, J5:OT, J5:OT-A, S1:DiP, S1:DiP-A, S1:OT, S1:OT-A, S5:DiP, S5:DiP-A, S5:OT, S5:OT-A |
| 290 | Yes         | 7       | 7-A  | 1000   | Bozic | 0   | last   | wholeT_0.01 | none                                                                                                                                                               |



Table 16: (continued)

|     | Conjunction | Drivers | Tree | S.Size | Model | sh  | S.Time | S.Type      | Best method(s)                                                                                                                                                                       |
|-----|-------------|---------|------|--------|-------|-----|--------|-------------|--------------------------------------------------------------------------------------------------------------------------------------------------------------------------------------|
| 291 | Yes         | 7       | 7-A  | 1000   | Bozic | 0   | last   | wholeT_0.5  | J1:CBN, J1:DiP, J1:DiP-A, J1:OT, J1:OT-A, J5:CBN, J5:CBN-A, J5:DiP, J5:DiP-A, J5:OT, J5:OT-A, S1:DiP, S1:DiP-A, S1:OT, S1:OT-A, S5:CBN, S5:CBN-A, S5:DiP, S5:DiP-A, S5:OT, S5:OT-A   |
| 292 | Yes         | 7       | 7-A  | 1000   | Bozic | 0   | unif   | singleC     | J1:CBN, J1:CBN-A, J1:DiP, J1:OT, J1:OT-A, J5:CBN, J5:CBN-A, J5:DiP, J5:DiP-A, J5:OT, J5:OT-A, S1:DiP, S1:DiP-A, S1:OT, S1:OT-A, S5:CBN, S5:CBN-A, S5:DiP, S5:DiP-A, S5:OT, S5:OT-A   |
| 293 | Yes         | 7       | 7-A  | 1000   | Bozic | 0   | unif   | wholeT_0.01 | J5:CBN, J5:CBN-A, J5:DiP, J5:DiP-A, J5:OT, J5:OT-A                                                                                                                                   |
| 294 | Yes         | 7       | 7-A  | 1000   | Bozic | 0   | unif   | wholeT_0.5  | none                                                                                                                                                                                 |
| 295 | Yes         | 7       | 7-A  | 1000   | Bozic | Inf | last   | singleC     | J1:DiP, J1:DiP-A, J1:OT, J1:OT-A, J5:DiP, J5:DiP-A, J5:OT, J5:OT-A, S1:DiP-A, S5:DiP, S5:DiP-A, S5:OT, S5:OT-A                                                                       |
| 296 | Yes         | 7       | 7-A  | 1000   | Bozic | Inf | last   | wholeT_0.01 | J5:CBN, J5:CBN-A, J5:DiP, J5:OT                                                                                                                                                      |
| 297 | Yes         | 7       | 7-A  | 1000   | Bozic | Inf | last   | wholeT_0.5  | J1:DiP, J1:DiP-A, J1:OT, J1:OT-A, J5:DiP, J5:DiP-A, J5:OT, J5:OT-A, S1:DiP, S1:DiP-A, S5:DiP, S5:DiP-A, S5:OT, S5:OT-A                                                               |
| 298 | Yes         | 7       | 7-A  | 1000   | Bozic | Inf | unif   | singleC     | J1:CBN, J1:CBN-A, J5:CBN, J5:CBN-A, J5:DiP, J5:DiP-A, J5:OT, J5:OT-A, S1:CBN, S1:CBN-A, S5:CBN, S5:CBN-A                                                                             |
| 299 | Yes         | 7       | 7-A  | 1000   | Bozic | Inf | unif   | wholeT_0.01 | J5:CBN, J5:CBN-A, S5:CBN, S5:CBN-A                                                                                                                                                   |
| 300 | Yes         | 7       | 7-A  | 1000   | Bozic | Inf | unif   | wholeT_0.5  | J1:CBN, J1:CBN-A, J5:CBN, J5:CBN-A, J5:DiP, J5:DiP-A, J5:OT, J5:OT-A, S1:CBN, S1:CBN-A, S5:CBN, S5:CBN-A, S5:DiP, S5:DiP-A, S5:OT, S5:OT-A                                           |
| 301 | Yes         | 7       | 7-A  | 1000   | exp   | 0   | last   | singleC     | J1:CBN, J1:CBN-A, J1:DiP, J1:DiP-A, J1:OT, J1:OT-A, J5:CBN, J5:CBN-A, J5:DiP-A, J5:OT, J5:OT-A, S1:DiP, S1:DiP-A, S1:OT, S1:OT-A, S5:CBN, S5:CBN-A, S5:DiP, S5:DiP-A, S5:OT, S5:OT-A |

Table 16: (continued)

|     | Conjunction | Drivers | Tree | S.Size | Model | sh  | S.Time | S.Type      | Best method(s)                                                                                                                                                                                       |
|-----|-------------|---------|------|--------|-------|-----|--------|-------------|------------------------------------------------------------------------------------------------------------------------------------------------------------------------------------------------------|
| 302 | Yes         | 7       | 7-A  | 1000   | exp   | 0   | last   | wholeT_0.01 | J1:CBN, J1:CBN-A, J1:DiP, J1:OT, J1:OT-A, J5:CBN, J5:CBN-A, J5:DiP, J5:DiP-A, J5:OT, J5:OT-A, S1:CBN-A, S1:DiP, S1:DiP-A, S1:OT, S1:OT-A, S5:DiP, S5:DiP-A, S5:OT, S5:OT-A                           |
| 303 | Yes         | 7       | 7-A  | 1000   | exp   | 0   | last   | wholeT_0.5  | J1:CBN, J1:CBN-A, J1:DiP, J1:DiP-A, J1:OT, J1:OT-A, J5:CBN, J5:CBN-A, J5:DiP, J5:DiP-A, J5:OT, J5:OT-A, S1:DiP, S1:DiP-A, S1:OT, S1:OT-A, S5:CBN, S5:CBN-A, S5:DiP, S5:DiP-A, S5:OT, S5:OT-A         |
| 304 | Yes         | 7       | 7-A  | 1000   | exp   | 0   | unif   | singleC     | J1:CBN, J1:CBN-A, J1:DiP, J1:OT, J1:OT-A, J5:CBN, J5:CBN-A, J5:DiP, J5:DiP-A, J5:OT, J5:OT-A, S1:CBN, S1:CBN-A, S1:DiP, S1:DiP-A, S1:OT, S1:OT-A, S5:CBN, S5:CBN-A, S5:DiP, S5:DiP-A, S5:OT, S5:OT-A |
| 305 | Yes         | 7       | 7-A  | 1000   | exp   | 0   | unif   | wholeT_0.01 | J1:CBN, J1:CBN-A, J1:DiP, J1:DiP-A, J1:OT, J1:OT-A, J5:CBN, J5:CBN-A, J5:DiP, J5:DiP-A, J5:OT, J5:OT-A, S5:CBN, S5:CBN-A, S5:DiP, S5:DiP-A, S5:OT, S5:OT-A                                           |
| 306 | Yes         | 7       | 7-A  | 1000   | exp   | 0   | unif   | wholeT_0.5  | none                                                                                                                                                                                                 |
| 307 | Yes         | 7       | 7-A  | 1000   | exp   | Inf | last   | singleC     | J1:DiP, J1:DiP-A, J1:OT, J1:OT-A, J5:CBN, J5:CBN-A, J5:DiP, J5:DiP-A, J5:OT, J5:OT-A, S1:DiP, S1:DiP-A, S5:DiP, S5:DiP-A, S5:OT, S5:OT-A                                                             |
| 308 | Yes         | 7       | 7-A  | 1000   | exp   | Inf | last   | wholeT_0.01 | J1:CBN-A, J5:CBN, J5:CBN-A, J5:DiP, J5:DiP-A, J5:OT, J5:OT-A, S5:CBN, S5:CBN-A, S5:DiP, S5:DiP-A, S5:OT, S5:OT-A                                                                                     |
| 309 | Yes         | 7       | 7-A  | 1000   | exp   | Inf | last   | wholeT_0.5  | J1:DiP, J1:DiP-A, J1:OT, J1:OT-A, J5:CBN, J5:CBN-A, J5:DiP, J5:DiP-A, J5:OT, J5:OT-A, S1:DiP, S1:DiP-A, S1:OT, S1:OT-A, S5:DiP, S5:DiP-A, S5:OT, S5:OT-A                                             |

Table 16: (continued)

|     | Conjunction | Drivers | Tree | S.Size | Model | sh  | S.Time | S.Type      | Best method(s)                                                                                                                                                                                          |
|-----|-------------|---------|------|--------|-------|-----|--------|-------------|---------------------------------------------------------------------------------------------------------------------------------------------------------------------------------------------------------|
| 310 | Yes         | 7       | 7-A  | 1000   | exp   | Inf | unif   | singleC     | J1:CBN, J1:CBN-A, J1:DiP, J1:DiP-A, J1:OT, J1:OT-A, J5:CBN, J5:CBN-A, J5:DiP, J5:DiP-A, J5:OT, J5:OT-A, S1:CBN, S1:DiP-A, S5:CBN, S5:CBN-A, S5:DiP, S5:DiP-A, S5:OT, S5:OT-A                            |
| 311 | Yes         | 7       | 7-A  | 1000   | exp   | Inf | unif   | wholeT_0.01 | J1:CBN, J1:CBN-A, J5:CBN, J5:CBN-A, S5:CBN, S5:CBN-A                                                                                                                                                    |
| 312 | Yes         | 7       | 7-A  | 1000   | exp   | Inf | unif   | wholeT_0.5  | J1:CBN, J1:CBN-A, J1:DiP, J1:DiP-A, J1:OT, J1:OT-A, J5:CBN, J5:CBN-A, J5:DiP, J5:DiP-A, J5:OT, J5:OT-A, S1:CBN, S1:CBN-A, S5:CBN, S5:CBN-A, S5:DiP, S5:DiP-A, S5:OT, S5:OT-A                            |
| 313 | Yes         | 7       | 7-A  | 1000   | McF_4 | 0   | last   | singleC     | J1:DiP, J1:DiP-A, J1:OT, J1:OT-A, J5:DiP, J5:DiP-A, J5:OT, S1:DiP, S1:DiP-A, S1:OT-A, S5:DiP                                                                                                            |
| 314 | Yes         | 7       | 7-A  | 1000   | McF_4 | 0   | last   | wholeT_0.01 | J1:DiP-A, J1:OT, J1:OT-A, J5:DiP, J5:DiP-A, J5:OT, J5:OT-A, S5:OT, S5:OT-A                                                                                                                              |
| 315 | Yes         | 7       | 7-A  | 1000   | McF_4 | 0   | last   | wholeT_0.5  | J1:DiP, J1:DiP-A, J1:OT, J1:OT-A, J5:DiP, J5:DiP-A, J5:OT, J5:OT-A, S1:DiP, S1:DiP-A, S1:OT, S1:OT-A, S5:DiP, S5:DiP-A, S5:OT, S5:OT-A                                                                  |
| 316 | Yes         | 7       | 7-A  | 1000   | McF_4 | 0   | unif   | singleC     | J1:CBN, J1:CBN-A, J1:DiP, J1:DiP-A, J1:OT, J1:OT-A, J5:CBN, J5:CBN-A, J5:DiP, J5:DiP-A, J5:OT-A, S1:CBN, S1:CBN-A, S1:DiP, S1:DiP-A, S1:OT, S1:OT-A, S5:CBN, S5:CBN-A, S5:DiP, S5:DiP-A, S5:OT, S5:OT-A |
| 317 | Yes         | 7       | 7-A  | 1000   | McF_4 | 0   | unif   | wholeT_0.01 | J1:CBN, J1:CBN-A, J1:DiP, J1:DiP-A, J1:OT, J1:OT-A, J5:CBN, J5:CBN-A, J5:DiP, J5:DiP-A, J5:OT, J5:OT-A, S1:DiP, S1:DiP-A, S5:CBN, S5:CBN-A, S5:DiP, S5:DiP-A, S5:OT, S5:OT-A                            |
| 318 | Yes         | 7       | 7-A  | 1000   | McF_4 | 0   | unif   | wholeT_0.5  | J1:CBN, J1:CBN-A, J1:DiP, J1:DiP-A, J1:OT, J1:OT-A, J5:CBN, J5:CBN-A, J5:DiP, J5:DiP-A, J5:OT, J5:OT-A, S1:CBN, S1:CBN-A, S1:DiP, S1:DiP-A, S1:OT, S1:OT-A, S5:CBN, S5:DiP, S5:DiP-A, S5:OT, S5:OT-A    |

Table 16: (continued)

|     | Conjunction | Drivers | Tree | S.Size | Model | sh  | S.Time | S.Type      | Best method(s)                                                                                                                                                                               |
|-----|-------------|---------|------|--------|-------|-----|--------|-------------|----------------------------------------------------------------------------------------------------------------------------------------------------------------------------------------------|
| 319 | Yes         | 7       | 7-A  | 1000   | McF_4 | Inf | last   | singleC     | J1:DiP, J1:DiP-A, J1:OT, J1:OT-A, J5:DiP, J5:DiP-A, J5:OT, J5:OT-A, S1:DiP, S1:DiP-A, S1:OT, S5:DiP, S5:DiP-A, S5:OT, S5:OT-A                                                                |
| 320 | Yes         | 7       | 7-A  | 1000   | McF_4 | Inf | last   | wholeT_0.01 | J1:DiP, J5:DiP, J5:DiP-A, J5:OT, J5:OT-A, S5:DiP, S5:OT, S5:OT-A                                                                                                                             |
| 321 | Yes         | 7       | 7-A  | 1000   | McF_4 | Inf | last   | wholeT_0.5  | J1:DiP, J1:DiP-A, J1:OT, J1:OT-A, J5:DiP, J5:DiP-A, J5:OT, J5:OT-A, S1:DiP, S1:DiP-A, S1:OT, S5:DiP, S5:DiP-A, S5:OT, S5:OT-A                                                                |
| 322 | Yes         | 7       | 7-A  | 1000   | McF_4 | Inf | unif   | singleC     | J1:CBN, J1:CBN-A, J1:DiP, J1:DiP-A, J1:OT, J1:OT-A, J5:CBN, J5:CBN-A, J5:DiP, J5:DiP-A, J5:OT, J5:OT-A, S1:CBN, S1:CBN-A, S1:DiP, S1:OT, S1:OT-A, S5:CBN-A, S5:DiP, S5:DiP-A, S5:OT, S5:OT-A |
| 323 | Yes         | 7       | 7-A  | 1000   | McF_4 | Inf | unif   | wholeT_0.01 | J1:CBN, J1:CBN-A, J1:DiP, J1:DiP-A, J1:OT, J1:OT-A, J5:CBN, J5:CBN-A, J5:DiP, J5:DiP-A, J5:OT, J5:OT-A, S5:CBN, S5:CBN-A, S5:DiP, S5:DiP-A, S5:OT, S5:OT-A                                   |
| 324 | Yes         | 7       | 7-A  | 1000   | McF_4 | Inf | unif   | wholeT_0.5  | J1:CBN, J1:CBN-A, J1:DiP, J1:OT, J1:OT-A, J5:CBN, J5:CBN-A, J5:DiP, J5:DiP-A, J5:OT, J5:OT-A, S1:CBN, S1:CBN-A, S1:DiP, S1:DiP-A, S1:OT, S1:OT-A, S5:CBN, S5:DiP-A, S5:OT, S5:OT-A           |
| 325 | Yes         | 7       | 7-A  | 1000   | McF_6 | 0   | last   | singleC     | J1:DiP, J1:OT, J1:OT-A, J5:DiP, J5:OT, J5:OT-A, S1:DiP, S5:DiP, S5:OT, S5:OT-A                                                                                                               |
| 326 | Yes         | 7       | 7-A  | 1000   | McF_6 | 0   | last   | wholeT_0.01 | J1:DiP, J1:OT, J1:OT-A, J5:DiP, J5:OT, J5:OT-A, S1:DiP, S5:DiP, S5:OT, S5:OT-A                                                                                                               |
| 327 | Yes         | 7       | 7-A  | 1000   | McF_6 | 0   | last   | wholeT_0.5  | J1:DiP, J1:OT, J1:OT-A, J5:DiP, J5:OT, J5:OT-A, S1:DiP, S5:DiP, S5:OT, S5:OT-A                                                                                                               |
| 328 | Yes         | 7       | 7-A  | 1000   | McF_6 | 0   | unif   | singleC     | none                                                                                                                                                                                         |

Table 16: (continued)

|     | Conjunction | Drivers | Tree | S.Size | Model | sh  | S.Time | S.Type      | Best method(s)                                                                                                                                                                                       |
|-----|-------------|---------|------|--------|-------|-----|--------|-------------|------------------------------------------------------------------------------------------------------------------------------------------------------------------------------------------------------|
| 329 | Yes         | 7       | 7-A  | 1000   | McF_6 | 0   | unif   | wholeT_0.01 | J1:CBN, J1:CBN-A, J1:DiP, J1:DiP-A, J1:OT, J1:OT-A, J5:CBN, J5:CBN-A, J5:DiP, J5:DiP-A, J5:OT, J5:OT-A, S5:CBN, S5:CBN-A, S5:DiP, S5:DiP-A, S5:OT, S5:OT-A                                           |
| 330 | Yes         | 7       | 7-A  | 1000   | McF_6 | 0   | unif   | wholeT_0.5  | none                                                                                                                                                                                                 |
| 331 | Yes         | 7       | 7-A  | 1000   | McF_6 | Inf | last   | singleC     | J1:DiP, J1:DiP-A, J1:OT, J1:OT-A, J5:DiP, J5:DiP-A, J5:OT, J5:OT-A, S1:DiP, S5:DiP, S5:OT, S5:OT-A                                                                                                   |
| 332 | Yes         | 7       | 7-A  | 1000   | McF_6 | Inf | last   | wholeT_0.01 | J1:DiP, J5:DiP, J5:OT, J5:OT-A, S1:DiP, S5:DiP, S5:OT, S5:OT-A                                                                                                                                       |
| 333 | Yes         | 7       | 7-A  | 1000   | McF_6 | Inf | last   | wholeT_0.5  | J1:DiP, J1:DiP-A, J1:OT, J1:OT-A, J5:DiP, J5:DiP-A, J5:OT, J5:OT-A, S1:DiP, S1:DiP-A, S5:DiP, S5:DiP-A, S5:OT, S5:OT-A                                                                               |
| 334 | Yes         | 7       | 7-A  | 1000   | McF_6 | Inf | unif   | singleC     | J1:CBN, J1:CBN-A, J1:DiP, J1:DiP-A, J1:OT, J1:OT-A, J5:CBN, J5:DiP, J5:DiP-A, J5:OT, J5:OT-A, S1:CBN, S1:CBN-A, S1:DiP, S1:DiP-A, S1:OT, S1:OT-A, S5:CBN, S5:CBN-A, S5:DiP, S5:DiP-A, S5:OT, S5:OT-A |
| 335 | Yes         | 7       | 7-A  | 1000   | McF_6 | Inf | unif   | wholeT_0.01 | J1:CBN, J1:CBN-A, J1:DiP, J1:DiP-A, J1:OT, J1:OT-A, J5:CBN, J5:CBN-A, J5:DiP, J5:DiP-A, J5:OT, J5:OT-A, S5:CBN, S5:CBN-A, S5:DiP, S5:DiP-A, S5:OT, S5:OT-A                                           |
| 336 | Yes         | 7       | 7-A  | 1000   | McF_6 | Inf | unif   | wholeT_0.5  | J1:CBN, J1:CBN-A, J1:DiP, J1:DiP-A, J1:OT, J1:OT-A, J5:CBN, J5:DiP, J5:DiP-A, J5:OT, J5:OT-A, S1:CBN, S1:CBN-A, S1:DiP, S1:DiP-A, S1:OT, S1:OT-A, S5:CBN, S5:CBN-A, S5:DiP, S5:DiP-A, S5:OT, S5:OT-A |
| 337 | Yes         | 7       | 7-A  | 200    | Bozic | 0   | last   | singleC     | J1:CBN, J1:CBN-A, J1:DiP, J1:DiP-A, J1:OT, J1:OT-A, J5:CBN, J5:CBN-A, J5:DiP, J5:DiP-A, J5:OT, J5:OT-A, S1:DiP, S1:DiP-A, S1:OT, S5:DiP, S5:DiP-A, S5:OT, S5:OT-A                                    |

Table 16: (continued)

|     | Conjunction | Drivers | Tree | S.Size | Model | sh  | S.Time | S.Type      | Best method(s)                                                                                                                                                                |
|-----|-------------|---------|------|--------|-------|-----|--------|-------------|-------------------------------------------------------------------------------------------------------------------------------------------------------------------------------|
| 338 | Yes         | 7       | 7-A  | 200    | Bozic | 0   | last   | wholeT_0.01 | J1:CBN-A, J1:DiP, J1:DiP-A, J1:OT, J1:OT-A, J5:CBN, J5:CBN-A, J5:DiP, J5:DiP-A, J5:OT, J5:OT-A, S1:DiP, S1:DiP-A, S5:CBN, S5:CBN-A, S5:DiP, S5:DiP-A, S5:OT, S5:OT-A          |
| 339 | Yes         | 7       | 7-A  | 200    | Bozic | 0   | last   | wholeT_0.5  | J1:CBN, J1:CBN-A, J1:DiP, J1:DiP-A, J1:OT, J1:OT-A, J5:CBN, J5:CBN-A, J5:DiP, J5:DiP-A, J5:OT, J5:OT-A, S1:DiP, S1:DiP-A, S5:CBN, S5:CBN-A, S5:DiP, S5:DiP-A, S5:OT, S5:OT-A  |
| 340 | Yes         | 7       | 7-A  | 200    | Bozic | 0   | unif   | singleC     | J1:CBN-A, J1:DiP, J1:DiP-A, J1:OT, J1:OT-A, J5:CBN, J5:CBN-A, J5:DiP, J5:DiP-A, J5:OT, J5:OT-A, S1:DiP, S1:DiP-A, S1:OT, S5:CBN, S5:CBN-A, S5:DiP, S5:DiP-A, S5:OT            |
| 341 | Yes         | 7       | 7-A  | 200    | Bozic | 0   | unif   | wholeT_0.01 | J5:CBN, J5:CBN-A, J5:DiP, J5:DiP-A, J5:OT, J5:OT-A                                                                                                                            |
| 342 | Yes         | 7       | 7-A  | 200    | Bozic | 0   | unif   | wholeT_0.5  | J1:CBN-A, J1:DiP, J1:DiP-A, J1:OT, J1:OT-A, J5:CBN, J5:CBN-A, J5:DiP, J5:DiP-A, J5:OT, J5:OT-A, S1:DiP, S1:DiP-A, S1:OT-A, S5:CBN, S5:CBN-A, S5:DiP, S5:DiP-A, S5:OT, S5:OT-A |
| 343 | Yes         | 7       | 7-A  | 200    | Bozic | Inf | last   | singleC     | J1:DiP, J1:DiP-A, J5:DiP, J5:DiP-A, J5:OT, J5:OT-A, S5:DiP, S5:DiP-A, S5:OT, S5:OT-A                                                                                          |
| 344 | Yes         | 7       | 7-A  | 200    | Bozic | Inf | last   | wholeT_0.01 | J5:CBN-A, J5:DiP, J5:DiP-A, J5:OT                                                                                                                                             |
| 345 | Yes         | 7       | 7-A  | 200    | Bozic | Inf | last   | wholeT_0.5  | J1:DiP, J1:DiP-A, J5:DiP, J5:DiP-A, J5:OT, J5:OT-A, S1:DiP, S1:DiP-A, S5:DiP, S5:DiP-A, S5:OT, S5:OT-A                                                                        |
| 346 | Yes         | 7       | 7-A  | 200    | Bozic | Inf | unif   | singleC     | J1:CBN, J1:CBN-A, J5:CBN, J5:CBN-A, J5:DiP, J5:DiP-A, J5:OT, J5:OT-A, S5:CBN, S5:CBN-A                                                                                        |
| 347 | Yes         | 7       | 7-A  | 200    | Bozic | Inf | unif   | wholeT_0.01 | J5:CBN, J5:CBN-A, S5:CBN, S5:CBN-A                                                                                                                                            |
| 348 | Yes         | 7       | 7-A  | 200    | Bozic | Inf | unif   | wholeT_0.5  | J1:CBN, J1:CBN-A, J5:CBN, J5:CBN-A, J5:DiP, J5:DiP-A, J5:OT, J5:OT-A, S5:CBN, S5:CBN-A, S5:DiP, S5:DiP-A, S5:OT, S5:OT-A                                                      |

Table 16: (continued)

|     | Conjunction | Drivers | Tree | S.Size | Model | sh  | S.Time | S.Type      | Best method(s)                                                                                                                                                                                         |
|-----|-------------|---------|------|--------|-------|-----|--------|-------------|--------------------------------------------------------------------------------------------------------------------------------------------------------------------------------------------------------|
| 349 | Yes         | 7       | 7-A  | 200    | exp   | 0   | last   | singleC     | J1:CBN, J1:CBN-A, J1:DiP, J1:DiP-A, J1:OT, J1:OT-A, J5:CBN, J5:CBN-A, J5:DiP, J5:DiP-A, J5:OT, J5:OT-A, S1:DiP, S1:DiP-A, S1:OT, S1:OT-A, S5:CBN, S5:CBN-A, S5:DiP, S5:DiP-A, S5:OT, S5:OT-A           |
| 350 | Yes         | 7       | 7-A  | 200    | exp   | 0   | last   | wholeT_0.01 | J1:CBN, J1:CBN-A, J1:DiP, J1:DiP-A, J1:OT, J1:OT-A, J5:CBN, J5:CBN-A, J5:DiP, J5:DiP-A, J5:OT, J5:OT-A, S1:CBN, S1:CBN-A, S1:DiP, S1:DiP-A, S5:CBN, S5:DiP, S5:DiP-A                                   |
| 351 | Yes         | 7       | 7-A  | 200    | exp   | 0   | last   | wholeT_0.5  | J1:CBN, J1:CBN-A, J1:DiP, J1:DiP-A, J1:OT, J1:OT-A, J5:CBN, J5:CBN-A, J5:DiP, J5:DiP-A, J5:OT, J5:OT-A, S1:DiP, S1:DiP-A, S1:OT, S1:OT-A, S5:CBN, S5:CBN-A, S5:DiP, S5:DiP-A, S5:OT, S5:OT-A           |
| 352 | Yes         | 7       | 7-A  | 200    | exp   | 0   | unif   | singleC     | none                                                                                                                                                                                                   |
| 353 | Yes         | 7       | 7-A  | 200    | exp   | 0   | unif   | wholeT_0.01 | J1:CBN, J1:CBN-A, J1:DiP, J1:DiP-A, J1:OT, J1:OT-A, J5:CBN, J5:CBN-A, J5:DiP, J5:DiP-A, J5:OT, J5:OT-A, S1:DiP, S1:DiP-A, S5:CBN, S5:CBN-A, S5:DiP, S5:DiP-A, S5:OT, S5:OT-A                           |
| 354 | Yes         | 7       | 7-A  | 200    | exp   | 0   | unif   | wholeT_0.5  | J1:CBN, J1:CBN-A, J1:DiP, J1:DiP-A, J1:OT, J1:OT-A, J5:CBN, J5:CBN-A, J5:DiP, J5:DiP-A, J5:OT, J5:OT-A, S1:CBN, S1:CBN-A, S1:DiP, S1:DiP-A, S1:OT, S1:OT-A, S5:CBN, S5:CBN-A, S5:DiP-A, S5:OT, S5:OT-A |
| 355 | Yes         | 7       | 7-A  | 200    | exp   | Inf | last   | singleC     | J1:DiP, J1:DiP-A, J1:OT, J1:OT-A, J5:CBN, J5:CBN-A, J5:DiP, J5:DiP-A, J5:OT, J5:OT-A, S1:DiP, S1:DiP-A, S5:DiP, S5:DiP-A, S5:OT, S5:OT-A                                                               |
| 356 | Yes         | 7       | 7-A  | 200    | exp   | Inf | last   | wholeT_0.01 | J1:DiP, J5:CBN, J5:CBN-A, J5:DiP, J5:DiP-A, J5:OT, S5:CBN-A, S5:DiP, S5:DiP-A                                                                                                                          |
| 357 | Yes         | 7       | 7-A  | 200    | exp   | Inf | last   | wholeT_0.5  | J1:DiP, J1:DiP-A, J1:OT, J1:OT-A, J5:CBN, J5:CBN-A, J5:DiP, J5:DiP-A, J5:OT, J5:OT-A, S1:DiP, S1:DiP-A, S5:DiP, S5:DiP-A, S5:OT, S5:OT-A                                                               |

Table 16: (continued)

|     | Conjunction | Drivers | Tree | S.Size | Model | sh  | S.Time | S.Type      | Best method(s)                                                                                                                                                               |
|-----|-------------|---------|------|--------|-------|-----|--------|-------------|------------------------------------------------------------------------------------------------------------------------------------------------------------------------------|
| 358 | Yes         | 7       | 7-A  | 200    | exp   | Inf | unif   | singleC     | J1:CBN, J1:CBN-A, J1:DiP, J1:DiP-A, J1:OT-A, J5:CBN, J5:DiP, J5:DiP-A, J5:OT, J5:OT-A, S1:DiP-A, S5:CBN, S5:CBN-A, S5:DiP, S5:DiP-A, S5:OT, S5:OT-A                          |
| 359 | Yes         | 7       | 7-A  | 200    | exp   | Inf | unif   | wholeT_0.01 | J5:CBN, J5:CBN-A, J5:DiP-A, J5:OT, J5:OT-A, S5:CBN, S5:CBN-A                                                                                                                 |
| 360 | Yes         | 7       | 7-A  | 200    | exp   | Inf | unif   | wholeT_0.5  | J1:CBN, J1:CBN-A, J1:DiP, J1:DiP-A, J1:OT, J1:OT-A, J5:CBN-A, J5:DiP, J5:DiP-A, J5:OT, J5:OT-A, S1:DiP, S1:DiP-A, S5:CBN, S5:CBN-A, S5:DiP, S5:DiP-A, S5:OT, S5:OT-A         |
| 361 | Yes         | 7       | 7-A  | 200    | McF_4 | 0   | last   | singleC     | J1:DiP, J1:DiP-A, J1:OT, J1:OT-A, J5:DiP, J5:DiP-A, J5:OT, J5:OT-A, S5:DiP, S5:DiP-A, S5:OT, S5:OT-A                                                                         |
| 362 | Yes         | 7       | 7-A  | 200    | McF_4 | 0   | last   | wholeT_0.01 | J1:DiP, J1:DiP-A, J5:DiP, J5:DiP-A, J5:OT, J5:OT-A, S1:DiP, S1:DiP-A, S5:DiP, S5:DiP-A, S5:OT, S5:OT-A                                                                       |
| 363 | Yes         | 7       | 7-A  | 200    | McF_4 | 0   | last   | wholeT_0.5  | J1:DiP, J1:DiP-A, J1:OT, J1:OT-A, J5:DiP, J5:DiP-A, J5:OT, J5:OT-A, S5:DiP, S5:DiP-A, S5:OT                                                                                  |
| 364 | Yes         | 7       | 7-A  | 200    | McF_4 | 0   | unif   | singleC     | J1:CBN, J1:CBN-A, J1:DiP, J1:DiP-A, J1:OT, J1:OT-A, J5:CBN, J5:CBN-A, J5:DiP, J5:DiP-A, J5:OT, J5:OT-A, S1:DiP, S1:DiP-A, S5:CBN, S5:CBN-A, S5:DiP, S5:DiP-A, S5:OT, S5:OT-A |
| 365 | Yes         | 7       | 7-A  | 200    | McF_4 | 0   | unif   | wholeT_0.01 | J1:CBN, J1:CBN-A, J1:DiP, J1:DiP-A, J1:OT, J1:OT-A, J5:CBN, J5:CBN-A, J5:DiP, J5:DiP-A, J5:OT, J5:OT-A, S1:DiP, S1:DiP-A, S5:CBN, S5:CBN-A, S5:DiP, S5:DiP-A, S5:OT, S5:OT-A |
| 366 | Yes         | 7       | 7-A  | 200    | McF_4 | 0   | unif   | wholeT_0.5  | J1:CBN, J1:CBN-A, J1:DiP, J1:DiP-A, J1:OT, J1:OT-A, J5:CBN, J5:CBN-A, J5:DiP, J5:DiP-A, J5:OT, S1:DiP, S1:DiP-A, S5:CBN, S5:CBN-A, S5:DiP, S5:DiP-A, S5:OT, S5:OT-A          |
| 367 | Yes         | 7       | 7-A  | 200    | McF_4 | Inf | last   | singleC     | J1:DiP, J1:DiP-A, J1:OT, J1:OT-A, J5:DiP, J5:DiP-A, J5:OT, J5:OT-A, S1:DiP, S1:DiP-A, S5:DiP, S5:DiP-A, S5:OT, S5:OT-A                                                       |



Table 16: (continued)

|     | Conjunction | Drivers | Tree | S.Size | Model | sh  | S.Time | S.Type      | Best method(s)                                                                                                                                                               |
|-----|-------------|---------|------|--------|-------|-----|--------|-------------|------------------------------------------------------------------------------------------------------------------------------------------------------------------------------|
| 368 | Yes         | 7       | 7-A  | 200    | McF_4 | Inf | last   | wholeT_0.01 | J1:DiP, J1:DiP-A, J5:DiP, J5:DiP-A, J5:OT, J5:OT-A, S1:DiP-A, S5:DiP, S5:DiP-A, S5:OT, S5:OT-A                                                                               |
| 369 | Yes         | 7       | 7-A  | 200    | McF_4 | Inf | last   | wholeT_0.5  | J1:DiP, J1:DiP-A, J1:OT, J1:OT-A, J5:DiP, J5:DiP-A, J5:OT, J5:OT-A, S5:DiP, S5:DiP-A, S5:OT, S5:OT-A                                                                         |
| 370 | Yes         | 7       | 7-A  | 200    | McF_4 | Inf | unif   | singleC     | J1:CBN, J1:CBN-A, J1:DiP, J1:DiP-A, J1:OT, J1:OT-A, J5:CBN, J5:CBN-A, J5:DiP, J5:DiP-A, J5:OT, J5:OT-A, S5:CBN, S5:CBN-A, S5:DiP, S5:DiP-A, S5:OT, S5:OT-A                   |
| 371 | Yes         | 7       | 7-A  | 200    | McF_4 | Inf | unif   | wholeT_0.01 | J1:CBN, J1:CBN-A, J1:DiP, J1:DiP-A, J1:OT, J1:OT-A, J5:CBN, J5:CBN-A, J5:DiP, J5:DiP-A, J5:OT, J5:OT-A, S1:DiP, S1:DiP-A, S5:CBN, S5:CBN-A, S5:DiP, S5:DiP-A, S5:OT, S5:OT-A |
| 372 | Yes         | 7       | 7-A  | 200    | McF_4 | Inf | unif   | wholeT_0.5  | J1:CBN, J1:CBN-A, J1:DiP, J1:DiP-A, J1:OT, J1:OT-A, J5:CBN, J5:CBN-A, J5:DiP, J5:DiP-A, J5:OT, J5:OT-A, S1:DiP, S1:DiP-A, S5:CBN, S5:CBN-A, S5:DiP, S5:DiP-A, S5:OT, S5:OT-A |
| 373 | Yes         | 7       | 7-A  | 200    | McF_6 | 0   | last   | singleC     | J1:DiP, J1:OT, J5:DiP, J5:OT, J5:OT-A, S1:DiP, S5:DiP, S5:OT, S5:OT-A                                                                                                        |
| 374 | Yes         | 7       | 7-A  | 200    | McF_6 | 0   | last   | wholeT_0.01 | J1:DiP, J5:DiP, J5:OT, J5:OT-A, S1:DiP, S5:DiP, S5:OT, S5:OT-A                                                                                                               |
| 375 | Yes         | 7       | 7-A  | 200    | McF_6 | 0   | last   | wholeT_0.5  | J1:DiP, J1:OT, J1:OT-A, J5:DiP, J5:OT, J5:OT-A, S5:DiP, S5:OT, S5:OT-A                                                                                                       |
| 376 | Yes         | 7       | 7-A  | 200    | McF_6 | 0   | unif   | singleC     | J1:CBN, J1:CBN-A, J1:DiP, J1:DiP-A, J5:CBN, J5:CBN-A, J5:DiP, J5:DiP-A, S1:DiP, S1:DiP-A, S5:CBN, S5:CBN-A, S5:DiP, S5:DiP-A                                                 |
| 377 | Yes         | 7       | 7-A  | 200    | McF_6 | 0   | unif   | wholeT_0.01 | J1:CBN, J1:CBN-A, J1:DiP, J1:DiP-A, J1:OT-A, J5:CBN, J5:CBN-A, J5:DiP, J5:DiP-A, J5:OT-A, S5:CBN, S5:CBN-A, S5:DiP, S5:DiP-A                                                 |
| 378 | Yes         | 7       | 7-A  | 200    | McF_6 | 0   | unif   | wholeT_0.5  | J1:CBN, J1:CBN-A, J1:DiP, J1:DiP-A, J5:CBN, J5:CBN-A, J5:DiP, J5:DiP-A, S1:DiP, S1:DiP-A, S5:CBN, S5:CBN-A, S5:DiP, S5:DiP-A                                                 |

Table 16: (continued)

|     | Conjunction | Drivers | Tree | S.Size | Model | sh  | S.Time | S.Type      | Best method(s)                                                                                                                                                       |
|-----|-------------|---------|------|--------|-------|-----|--------|-------------|----------------------------------------------------------------------------------------------------------------------------------------------------------------------|
| 379 | Yes         | 7       | 7-A  | 200    | McF_6 | Inf | last   | singleC     | J1:DiP, J1:DiP-A, J5:DiP, J5:DiP-A, J5:OT, J5:OT-A, S1:DiP, S5:DiP, S5:DiP-A, S5:OT, S5:OT-A                                                                         |
| 380 | Yes         | 7       | 7-A  | 200    | McF_6 | Inf | last   | wholeT_0.01 | J1:DiP, J5:DiP, J5:OT, J5:OT-A, S1:DiP, S5:DiP, S5:OT, S5:OT-A                                                                                                       |
| 381 | Yes         | 7       | 7-A  | 200    | McF_6 | Inf | last   | wholeT_0.5  | J1:DiP, J1:DiP-A, J1:OT, J1:OT-A, J5:DiP, J5:DiP-A, J5:OT, J5:OT-A, S1:DiP, S5:DiP, S5:DiP-A, S5:OT, S5:OT-A                                                         |
| 382 | Yes         | 7       | 7-A  | 200    | McF_6 | Inf | unif   | singleC     | J1:CBN, J1:CBN-A, J1:DiP, J1:DiP-A, J5:CBN, J5:CBN-A, J5:DiP, J5:DiP-A, S1:DiP, S1:DiP-A, S5:CBN, S5:CBN-A, S5:DiP, S5:DiP-A                                         |
| 383 | Yes         | 7       | 7-A  | 200    | McF_6 | Inf | unif   | wholeT_0.01 | J1:DiP, J1:DiP-A, J5:CBN, J5:CBN-A, J5:DiP, J5:DiP-A, S1:DiP, S1:DiP-A, S5:CBN, S5:CBN-A, S5:DiP, S5:DiP-A                                                           |
| 384 | Yes         | 7       | 7-A  | 200    | McF_6 | Inf | unif   | wholeT_0.5  | J1:CBN, J1:CBN-A, J1:DiP, J1:DiP-A, J5:CBN, J5:CBN-A, J5:DiP, J5:DiP-A, S1:DiP, S1:DiP-A, S5:CBN, S5:DiP, S5:DiP-A                                                   |
| 385 | Yes         | 7       | 7-A  | 100    | Bozic | 0   | last   | singleC     | J1:DiP, J1:DiP-A, J5:CBN, J5:CBN-A, J5:DiP, J5:DiP-A, J5:OT, J5:OT-A, S1:DiP, S1:DiP-A, S5:CBN, S5:DiP, S5:DiP-A, S5:OT, S5:OT-A                                     |
| 386 | Yes         | 7       | 7-A  | 100    | Bozic | 0   | last   | wholeT_0.01 | J1:DiP, J1:DiP-A, J5:CBN, J5:CBN-A, J5:DiP, J5:DiP-A, J5:OT, J5:OT-A, S1:DiP, S1:DiP-A, S5:CBN, S5:CBN-A, S5:DiP, S5:DiP-A, S5:OT, S5:OT-A                           |
| 387 | Yes         | 7       | 7-A  | 100    | Bozic | 0   | last   | wholeT_0.5  | J1:DiP, J1:DiP-A, J5:CBN, J5:CBN-A, J5:DiP, J5:DiP-A, J5:OT, J5:OT-A, S1:DiP, S1:DiP-A, S5:DiP, S5:DiP-A, S5:OT, S5:OT-A                                             |
| 388 | Yes         | 7       | 7-A  | 100    | Bozic | 0   | unif   | singleC     | J1:CBN, J1:CBN-A, J1:DiP, J1:DiP-A, J1:OT, J1:OT-A, J5:CBN, J5:CBN-A, J5:DiP, J5:DiP-A, J5:OT, J5:OT-A, S1:DiP-A, S5:CBN, S5:CBN-A, S5:DiP, S5:DiP-A, S5:OT, S5:OT-A |
| 389 | Yes         | 7       | 7-A  | 100    | Bozic | 0   | unif   | wholeT_0.01 | J5:CBN, J5:CBN-A, J5:DiP, J5:DiP-A, J5:OT, J5:OT-A                                                                                                                   |

Table 16: (continued)

|     | Conjunction | Drivers | Tree | S.Size | Model | sh  | S.Time | S.Type      | Best method(s)                                                                                                                                                                               |
|-----|-------------|---------|------|--------|-------|-----|--------|-------------|----------------------------------------------------------------------------------------------------------------------------------------------------------------------------------------------|
| 390 | Yes         | 7       | 7-A  | 100    | Bozic | 0   | unif   | wholeT_0.5  | J1:CBN, J1:CBN-A, J1:DiP, J1:DiP-A, J1:OT, J1:OT-A, J5:CBN, J5:CBN-A, J5:DiP, J5:DiP-A, J5:OT, J5:OT-A, S1:DiP, S1:DiP-A, S5:CBN, S5:CBN-A, S5:DiP, S5:DiP-A, S5:OT, S5:OT-A                 |
| 391 | Yes         | 7       | 7-A  | 100    | Bozic | Inf | last   | singleC     | J1:DiP, J1:DiP-A, J5:DiP, J5:DiP-A, J5:OT, J5:OT-A, S1:DiP, S1:DiP-A, S5:DiP, S5:DiP-A                                                                                                       |
| 392 | Yes         | 7       | 7-A  | 100    | Bozic | Inf | last   | wholeT_0.01 | J5:CBN, J5:DiP, J5:DiP-A                                                                                                                                                                     |
| 393 | Yes         | 7       | 7-A  | 100    | Bozic | Inf | last   | wholeT_0.5  | J1:DiP, J1:DiP-A, J5:DiP, J5:DiP-A, J5:OT, J5:OT-A, S1:DiP, S1:DiP-A, S5:DiP, S5:DiP-A                                                                                                       |
| 394 | Yes         | 7       | 7-A  | 100    | Bozic | Inf | unif   | singleC     | J5:CBN, J5:CBN-A, J5:DiP, J5:DiP-A, J5:OT, J5:OT-A, S5:CBN, S5:CBN-A, S5:DiP, S5:DiP-A                                                                                                       |
| 395 | Yes         | 7       | 7-A  | 100    | Bozic | Inf | unif   | wholeT_0.01 | J5:CBN, J5:CBN-A, J5:OT, J5:OT-A, S5:CBN, S5:CBN-A, S5:OT, S5:OT-A                                                                                                                           |
| 396 | Yes         | 7       | 7-A  | 100    | Bozic | Inf | unif   | wholeT_0.5  | J5:CBN, J5:CBN-A, J5:DiP, J5:DiP-A, J5:OT, J5:OT-A, S5:CBN, S5:CBN-A, S5:DiP, S5:DiP-A, S5:OT, S5:OT-A                                                                                       |
| 397 | Yes         | 7       | 7-A  | 100    | exp   | 0   | last   | singleC     | J1:CBN, J1:CBN-A, J1:DiP, J1:DiP-A, J1:OT, J1:OT-A, J5:CBN, J5:CBN-A, J5:DiP, J5:DiP-A, J5:OT, J5:OT-A, S1:DiP, S1:DiP-A, S1:OT, S1:OT-A, S5:CBN, S5:CBN-A, S5:DiP, S5:DiP-A, S5:OT, S5:OT-A |
| 398 | Yes         | 7       | 7-A  | 100    | exp   | 0   | last   | wholeT_0.01 | J1:CBN, J1:CBN-A, J1:DiP, J1:DiP-A, J5:CBN, J5:CBN-A, J5:DiP, J5:DiP-A, J5:OT, J5:OT-A, S1:DiP, S1:DiP-A, S5:CBN, S5:DiP, S5:DiP-A                                                           |
| 399 | Yes         | 7       | 7-A  | 100    | exp   | 0   | last   | wholeT_0.5  | J1:CBN, J1:CBN-A, J1:DiP-A, J1:OT, J5:CBN, J5:DiP, J5:DiP-A, J5:OT, J5:OT-A, S1:DiP, S1:DiP-A, S1:OT, S5:CBN, S5:CBN-A, S5:DiP, S5:DiP-A, S5:OT, S5:OT-A                                     |

Table 16: (continued)

|     | Conjunction | Drivers | Tree | S.Size | Model | sh  | S.Time | S.Type      | Best method(s)                                                                                                                                                                                       |
|-----|-------------|---------|------|--------|-------|-----|--------|-------------|------------------------------------------------------------------------------------------------------------------------------------------------------------------------------------------------------|
| 400 | Yes         | 7       | 7-A  | 100    | exp   | 0   | unif   | singleC     | J1:CBN, J1:CBN-A, J1:DiP, J1:DiP-A, J1:OT, J1:OT-A, J5:CBN, J5:CBN-A, J5:DiP, J5:DiP-A, J5:OT, J5:OT-A, S1:DiP, S1:DiP-A, S1:OT, S1:OT-A, S5:CBN, S5:CBN-A, S5:DiP, S5:DiP-A, S5:OT, S5:OT-A         |
| 401 | Yes         | 7       | 7-A  | 100    | exp   | 0   | unif   | wholeT_0.01 | J1:DiP, J1:DiP-A, J5:CBN, J5:CBN-A, J5:DiP, J5:DiP-A, J5:OT, J5:OT-A, S1:DiP, S1:DiP-A, S5:CBN, S5:CBN-A, S5:DiP, S5:DiP-A, S5:OT, S5:OT-A                                                           |
| 402 | Yes         | 7       | 7-A  | 100    | exp   | 0   | unif   | wholeT_0.5  | J1:CBN, J1:CBN-A, J1:DiP, J1:DiP-A, J1:OT, J1:OT-A, J5:CBN, J5:DiP, J5:DiP-A, J5:OT, J5:OT-A, S1:CBN, S1:CBN-A, S1:DiP, S1:DiP-A, S1:OT, S1:OT-A, S5:CBN, S5:CBN-A, S5:DiP, S5:DiP-A, S5:OT, S5:OT-A |
| 403 | Yes         | 7       | 7-A  | 100    | exp   | Inf | last   | singleC     | J1:DiP, J1:DiP-A, J1:OT, J1:OT-A, J5:CBN, J5:CBN-A, J5:DiP, J5:DiP-A, J5:OT, J5:OT-A, S1:DiP, S1:DiP-A, S5:DiP, S5:DiP-A, S5:OT, S5:OT-A                                                             |
| 404 | Yes         | 7       | 7-A  | 100    | exp   | Inf | last   | wholeT_0.01 | J5:DiP, J5:DiP-A, S5:DiP                                                                                                                                                                             |
| 405 | Yes         | 7       | 7-A  | 100    | exp   | Inf | last   | wholeT_0.5  | J1:DiP, J1:DiP-A, J1:OT, J1:OT-A, J5:CBN, J5:CBN-A, J5:DiP, J5:DiP-A, J5:OT, J5:OT-A, S1:DiP, S1:DiP-A, S5:DiP, S5:DiP-A, S5:OT, S5:OT-A                                                             |
| 406 | Yes         | 7       | 7-A  | 100    | exp   | Inf | unif   | singleC     | J5:CBN, J5:CBN-A, J5:DiP, J5:DiP-A, J5:OT, J5:OT-A, S1:DiP, S5:CBN, S5:CBN-A, S5:DiP, S5:DiP-A, S5:OT, S5:OT-A                                                                                       |
| 407 | Yes         | 7       | 7-A  | 100    | exp   | Inf | unif   | wholeT_0.01 | J5:CBN, J5:CBN-A, J5:DiP, J5:OT, J5:OT-A, S5:CBN, S5:OT, S5:OT-A                                                                                                                                     |
| 408 | Yes         | 7       | 7-A  | 100    | exp   | Inf | unif   | wholeT_0.5  | J1:DiP, J1:DiP-A, J5:CBN, J5:CBN-A, J5:DiP, J5:DiP-A, J5:OT, J5:OT-A, S1:DiP, S5:CBN, S5:CBN-A, S5:DiP, S5:DiP-A, S5:OT, S5:OT-A                                                                     |
| 409 | Yes         | 7       | 7-A  | 100    | McF_4 | 0   | last   | singleC     | J1:DiP, J1:DiP-A, J1:OT-A, J5:DiP, J5:DiP-A, J5:OT, J5:OT-A, S1:DiP, S1:DiP-A, S5:DiP, S5:DiP-A, S5:OT, S5:OT-A                                                                                      |

Table 16: (continued)

|     | Conjunction | Drivers | Tree | S.Size | Model | sh  | S.Time | S.Type      | Best method(s)                                                                                                                                                       |
|-----|-------------|---------|------|--------|-------|-----|--------|-------------|----------------------------------------------------------------------------------------------------------------------------------------------------------------------|
| 410 | Yes         | 7       | 7-A  | 100    | McF_4 | 0   | last   | wholeT_0.01 | J1:DiP, J1:DiP-A, J5:DiP, J5:DiP-A, J5:OT, J5:OT-A, S1:DiP, S5:DiP, S5:DiP-A, S5:OT, S5:OT-A                                                                         |
| 411 | Yes         | 7       | 7-A  | 100    | McF_4 | 0   | last   | wholeT_0.5  | J1:DiP, J1:DiP-A, J1:OT, J1:OT-A, J5:DiP, J5:DiP-A, J5:OT, J5:OT-A, S1:DiP, S1:DiP-A, S5:DiP, S5:DiP-A, S5:OT, S5:OT-A                                               |
| 412 | Yes         | 7       | 7-A  | 100    | McF_4 | 0   | unif   | singleC     | J1:CBN-A, J1:DiP, J1:DiP-A, J5:CBN, J5:CBN-A, J5:DiP, J5:DiP-A, J5:OT, J5:OT-A, S1:DiP, S1:DiP-A, S5:CBN, S5:CBN-A, S5:DiP, S5:DiP-A, S5:OT, S5:OT-A                 |
| 413 | Yes         | 7       | 7-A  | 100    | McF_4 | 0   | unif   | wholeT_0.01 | J1:DiP, J5:CBN, J5:CBN-A, J5:DiP, J5:DiP-A, J5:OT, J5:OT-A, S5:CBN-A, S5:DiP, S5:DiP-A                                                                               |
| 414 | Yes         | 7       | 7-A  | 100    | McF_4 | 0   | unif   | wholeT_0.5  | J1:CBN, J1:CBN-A, J1:DiP, J1:DiP-A, J1:OT, J1:OT-A, J5:CBN, J5:CBN-A, J5:DiP, J5:DiP-A, J5:OT, J5:OT-A, S1:DiP, S1:DiP-A, S5:CBN-A, S5:DiP, S5:DiP-A, S5:OT, S5:OT-A |
| 415 | Yes         | 7       | 7-A  | 100    | McF_4 | Inf | last   | singleC     | J1:DiP, J1:DiP-A, J1:OT-A, J5:DiP, J5:DiP-A, J5:OT, J5:OT-A, S1:DiP, S1:DiP-A, S5:DiP, S5:DiP-A, S5:OT, S5:OT-A                                                      |
| 416 | Yes         | 7       | 7-A  | 100    | McF_4 | Inf | last   | wholeT_0.01 | J1:DiP, J1:DiP-A, J5:DiP, J5:DiP-A, J5:OT, J5:OT-A, S5:DiP, S5:DiP-A, S5:OT, S5:OT-A                                                                                 |
| 417 | Yes         | 7       | 7-A  | 100    | McF_4 | Inf | last   | wholeT_0.5  | J1:DiP, J1:DiP-A, J5:DiP, J5:DiP-A, J5:OT, J5:OT-A, S1:DiP, S1:DiP-A, S5:DiP, S5:DiP-A, S5:OT, S5:OT-A                                                               |
| 418 | Yes         | 7       | 7-A  | 100    | McF_4 | Inf | unif   | singleC     | J1:CBN-A, J1:DiP, J1:DiP-A, J5:CBN, J5:CBN-A, J5:DiP, J5:DiP-A, J5:OT, J5:OT-A, S1:DiP, S1:DiP-A, S5:CBN, S5:CBN-A, S5:DiP, S5:DiP-A, S5:OT, S5:OT-A                 |
| 419 | Yes         | 7       | 7-A  | 100    | McF_4 | Inf | unif   | wholeT_0.01 | J1:DiP, J5:CBN, J5:CBN-A, J5:DiP, J5:DiP-A, J5:OT, J5:OT-A, S5:CBN, S5:CBN-A, S5:DiP, S5:DiP-A                                                                       |

Table 16: (continued)

|     | Conjunction | Drivers | Tree | S.Size | Model | sh  | S.Time | S.Type      | Best method(s)                                                                                                                                                               |
|-----|-------------|---------|------|--------|-------|-----|--------|-------------|------------------------------------------------------------------------------------------------------------------------------------------------------------------------------|
| 420 | Yes         | 7       | 7-A  | 100    | McF_4 | Inf | unif   | wholeT_0.5  | J1:CBN, J1:CBN-A, J1:DiP, J1:DiP-A, J1:OT, J1:OT-A, J5:CBN, J5:CBN-A, J5:DiP, J5:DiP-A, J5:OT, J5:OT-A, S1:DiP, S1:DiP-A, S5:CBN, S5:CBN-A, S5:DiP, S5:DiP-A, S5:OT, S5:OT-A |
| 421 | Yes         | 7       | 7-A  | 100    | McF_6 | 0   | last   | singleC     | J1:DiP, J1:DiP-A, J5:DiP, J5:DiP-A, J5:OT, J5:OT-A, S1:DiP, S1:DiP-A, S5:DiP, S5:DiP-A, S5:OT, S5:OT-A                                                                       |
| 422 | Yes         | 7       | 7-A  | 100    | McF_6 | 0   | last   | wholeT_0.01 | J1:DiP, J5:DiP, J5:OT, J5:OT-A, S1:DiP, S5:DiP, S5:OT, S5:OT-A                                                                                                               |
| 423 | Yes         | 7       | 7-A  | 100    | McF_6 | 0   | last   | wholeT_0.5  | J1:DiP, J5:DiP, J5:OT, J5:OT-A, S1:DiP, S5:DiP, S5:DiP-A, S5:OT, S5:OT-A                                                                                                     |
| 424 | Yes         | 7       | 7-A  | 100    | McF_6 | 0   | unif   | singleC     | J1:CBN, J1:DiP-A, J5:CBN, J5:CBN-A, J5:DiP, J5:DiP-A, S1:DiP, S5:CBN, S5:CBN-A, S5:DiP-A                                                                                     |
| 425 | Yes         | 7       | 7-A  | 100    | McF_6 | 0   | unif   | wholeT_0.01 | J1:DiP, J5:CBN, J5:CBN-A, J5:DiP, J5:DiP-A, S5:CBN, S5:CBN-A, S5:DiP, S5:DiP-A                                                                                               |
| 426 | Yes         | 7       | 7-A  | 100    | McF_6 | 0   | unif   | wholeT_0.5  | J1:CBN-A, J1:DiP, J5:CBN, J5:CBN-A, J5:DiP, S1:DiP, S5:CBN, S5:CBN-A, S5:DiP, S5:DiP-A                                                                                       |
| 427 | Yes         | 7       | 7-A  | 100    | McF_6 | Inf | last   | singleC     | J1:DiP-A, J5:DiP, J5:DiP-A, J5:OT, J5:OT-A, S1:DiP, S1:DiP-A, S5:DiP, S5:DiP-A, S5:OT, S5:OT-A                                                                               |
| 428 | Yes         | 7       | 7-A  | 100    | McF_6 | Inf | last   | wholeT_0.01 | J5:DiP, J5:OT, J5:OT-A, S1:DiP, S5:DiP, S5:OT, S5:OT-A                                                                                                                       |
| 429 | Yes         | 7       | 7-A  | 100    | McF_6 | Inf | last   | wholeT_0.5  | J1:DiP, J5:DiP, J5:DiP-A, J5:OT, J5:OT-A, S1:DiP, S5:DiP, S5:DiP-A, S5:OT, S5:OT-A                                                                                           |
| 430 | Yes         | 7       | 7-A  | 100    | McF_6 | Inf | unif   | singleC     | J1:DiP, J1:DiP-A, J5:CBN, J5:CBN-A, J5:DiP, J5:DiP-A, S1:DiP, S1:DiP-A, S5:CBN, S5:CBN-A, S5:DiP, S5:DiP-A                                                                   |
| 431 | Yes         | 7       | 7-A  | 100    | McF_6 | Inf | unif   | wholeT_0.01 | J1:DiP, J1:DiP-A, J5:CBN, J5:CBN-A, J5:DiP, J5:DiP-A, S1:DiP-A, S5:CBN, S5:CBN-A, S5:DiP, S5:DiP-A                                                                           |
| 432 | Yes         | 7       | 7-A  | 100    | McF_6 | Inf | unif   | wholeT_0.5  | J1:CBN, J1:CBN-A, J1:DiP, J1:DiP-A, J5:CBN, J5:CBN-A, J5:DiP, J5:DiP-A, S1:DiP, S1:DiP-A, S5:CBN, S5:CBN-A, S5:DiP, S5:DiP-A                                                 |

Table 16: (continued)

|     | Conjunction | Drivers | Tree | S.Size | Model | sh  | S.Time | S.Type      | Best method(s)                                                                                                                                                     |
|-----|-------------|---------|------|--------|-------|-----|--------|-------------|--------------------------------------------------------------------------------------------------------------------------------------------------------------------|
| 433 | No          | 11      | 11-B | 1000   | Bozic | 0   | last   | singleC     | J1:DiP, J1:DiP-A, J1:OT, J1:OT-A, J5:DiP, J5:DiP-A, J5:OT, J5:OT-A, S1:OT, S1:OT-A, S5:DiP, S5:DiP-A, S5:OT, S5:OT-A                                               |
| 434 | No          | 11      | 11-B | 1000   | Bozic | 0   | last   | wholeT_0.01 | J1:DiP, J1:DiP-A, J5:DiP, J5:DiP-A, S1:DiP, S1:DiP-A, S5:DiP, S5:DiP-A                                                                                             |
| 435 | No          | 11      | 11-B | 1000   | Bozic | 0   | last   | wholeT_0.5  | J1:DiP, J1:DiP-A, J1:OT, J1:OT-A, J5:DiP-A, J5:OT, J5:OT-A, S1:OT, S1:OT-A, S5:DiP, S5:DiP-A, S5:OT, S5:OT-A                                                       |
| 436 | No          | 11      | 11-B | 1000   | Bozic | 0   | unif   | singleC     | J1:DiP, J1:DiP-A, J1:OT, J1:OT-A, J5:CBN, J5:CBN-A, J5:DiP, J5:DiP-A, J5:OT, S1:DiP, S1:DiP-A, S1:OT, S1:OT-A, S5:DiP, S5:DiP-A, S5:OT, S5:OT-A                    |
| 437 | No          | 11      | 11-B | 1000   | Bozic | 0   | unif   | wholeT_0.01 | J5:DiP, J5:DiP-A, J5:OT, J5:OT-A, S5:OT, S5:OT-A                                                                                                                   |
| 438 | No          | 11      | 11-B | 1000   | Bozic | 0   | unif   | wholeT_0.5  | J1:CBN, J1:CBN-A, J1:DiP-A, J1:OT, J1:OT-A, J5:CBN, J5:CBN-A, J5:DiP, J5:DiP-A, J5:OT, J5:OT-A, S1:DiP, S1:DiP-A, S1:OT, S1:OT-A, S5:DiP, S5:DiP-A, S5:OT, S5:OT-A |
| 439 | No          | 11      | 11-B | 1000   | Bozic | Inf | last   | singleC     | J1:DiP, J1:DiP-A, J1:OT, J1:OT-A, J5:DiP, J5:DiP-A, J5:OT, J5:OT-A, S5:DiP, S5:DiP-A, S5:OT, S5:OT-A                                                               |
| 440 | No          | 11      | 11-B | 1000   | Bozic | Inf | last   | wholeT_0.01 | J5:DiP, J5:DiP-A, J5:OT, J5:OT-A                                                                                                                                   |
| 441 | No          | 11      | 11-B | 1000   | Bozic | Inf | last   | wholeT_0.5  | J1:DiP, J1:DiP-A, J1:OT, J1:OT-A, J5:DiP, J5:DiP-A, J5:OT, J5:OT-A, S5:DiP, S5:DiP-A, S5:OT, S5:OT-A                                                               |
| 442 | No          | 11      | 11-B | 1000   | Bozic | Inf | unif   | singleC     | J1:DiP, J1:DiP-A, J1:OT, J1:OT-A, J5:DiP, J5:DiP-A, J5:OT, J5:OT-A, S5:DiP, S5:DiP-A, S5:OT, S5:OT-A                                                               |
| 443 | No          | 11      | 11-B | 1000   | Bozic | Inf | unif   | wholeT_0.01 | J5:DiP, J5:DiP-A, J5:OT, J5:OT-A                                                                                                                                   |
| 444 | No          | 11      | 11-B | 1000   | Bozic | Inf | unif   | wholeT_0.5  | J1:DiP, J1:DiP-A, J1:OT, J1:OT-A, J5:DiP, J5:DiP-A, J5:OT, J5:OT-A, S5:DiP, S5:DiP-A, S5:OT, S5:OT-A                                                               |
| 445 | No          | 11      | 11-B | 1000   | exp   | 0   | last   | singleC     | J1:DiP, J1:DiP-A, J1:OT, J1:OT-A, J5:CBN, J5:CBN-A, J5:DiP, J5:DiP-A, J5:OT, J5:OT-A, S1:DiP-A, S1:OT-A, S5:DiP-A, S5:OT, S5:OT-A                                  |

Table 16: (continued)

|     | Conjunction | Drivers | Tree | S.Size | Model | sh  | S.Time | S.Type      | Best method(s)                                                                                                                                                             |
|-----|-------------|---------|------|--------|-------|-----|--------|-------------|----------------------------------------------------------------------------------------------------------------------------------------------------------------------------|
| 446 | No          | 11      | 11-B | 1000   | exp   | 0   | last   | wholeT_0.01 | J1:DiP, J1:DiP-A, J1:OT, J1:OT-A, J5:DiP, J5:DiP-A, J5:OT, J5:OT-A, S1:DiP-A, S1:OT, S1:OT-A, S5:DiP-A, S5:OT, S5:OT-A                                                     |
| 447 | No          | 11      | 11-B | 1000   | exp   | 0   | last   | wholeT_0.5  | J1:DiP, J1:DiP-A, J1:OT, J1:OT-A, J5:CBN, J5:CBN-A, J5:DiP, J5:DiP-A, J5:OT, J5:OT-A, S1:DiP, S1:DiP-A, S1:OT, S1:OT-A, S5:DiP, S5:DiP-A, S5:OT, S5:OT-A                   |
| 448 | No          | 11      | 11-B | 1000   | exp   | 0   | unif   | singleC     | J1:CBN, J1:CBN-A, J1:DiP, J1:DiP-A, J1:OT, J1:OT-A, J5:CBN, J5:CBN-A, J5:DiP, J5:DiP-A, J5:OT, J5:OT-A, S1:DiP, S1:DiP-A, S1:OT, S1:OT-A, S5:DiP, S5:DiP-A, S5:OT, S5:OT-A |
| 449 | No          | 11      | 11-B | 1000   | exp   | 0   | unif   | wholeT_0.01 | J1:DiP, J1:DiP-A, J1:OT, J1:OT-A, J5:CBN, J5:CBN-A, J5:DiP, J5:DiP-A, J5:OT, J5:OT-A, S1:DiP-A, S1:OT-A, S5:DiP, S5:DiP-A, S5:OT, S5:OT-A                                  |
| 450 | No          | 11      | 11-B | 1000   | exp   | 0   | unif   | wholeT_0.5  | J1:CBN, J1:CBN-A, J1:DiP, J1:DiP-A, J1:OT, J1:OT-A, J5:CBN, J5:CBN-A, J5:DiP, J5:DiP-A, J5:OT, J5:OT-A, S1:DiP, S1:DiP-A, S1:OT, S1:OT-A, S5:DiP, S5:DiP-A, S5:OT, S5:OT-A |
| 451 | No          | 11      | 11-B | 1000   | exp   | Inf | last   | singleC     | J1:DiP, J1:DiP-A, J1:OT, J1:OT-A, J5:DiP, J5:DiP-A, J5:OT, J5:OT-A, S1:DiP, S5:DiP, S5:DiP-A, S5:OT, S5:OT-A                                                               |
| 452 | No          | 11      | 11-B | 1000   | exp   | Inf | last   | wholeT_0.01 | J5:DiP, J5:DiP-A, J5:OT, S5:DiP, S5:DiP-A, S5:OT-A                                                                                                                         |
| 453 | No          | 11      | 11-B | 1000   | exp   | Inf | last   | wholeT_0.5  | J1:DiP, J1:DiP-A, J1:OT, J1:OT-A, J5:DiP, J5:DiP-A, J5:OT, J5:OT-A, S5:DiP, S5:DiP-A, S5:OT, S5:OT-A                                                                       |
| 454 | No          | 11      | 11-B | 1000   | exp   | Inf | unif   | singleC     | J1:DiP, J1:DiP-A, J1:OT, J1:OT-A, J5:CBN, J5:CBN-A, J5:DiP, J5:DiP-A, J5:OT, J5:OT-A, S5:DiP, S5:OT, S5:OT-A                                                               |
| 455 | No          | 11      | 11-B | 1000   | exp   | Inf | unif   | wholeT_0.01 | J5:DiP, J5:DiP-A, J5:OT, J5:OT-A, S5:DiP, S5:DiP-A, S5:OT-A                                                                                                                |



Table 16: (continued)

|     | Conjunction | Drivers | Tree | S.Size | Model | sh  | S.Time | S.Type      | Best method(s)                                                                                                                                           |
|-----|-------------|---------|------|--------|-------|-----|--------|-------------|----------------------------------------------------------------------------------------------------------------------------------------------------------|
| 456 | No          | 11      | 11-B | 1000   | exp   | Inf | unif   | wholeT_0.5  | J1:DiP, J1:DiP-A, J1:OT, J1:OT-A, J5:CBN, J5:CBN-A, J5:DiP, J5:DiP-A, J5:OT, J5:OT-A, S5:DiP, S5:DiP-A, S5:OT, S5:OT-A                                   |
| 457 | No          | 11      | 11-B | 1000   | McF_4 | 0   | last   | singleC     | J1:CBN, J1:DiP, J1:DiP-A, J1:OT, J1:OT-A, J5:CBN, J5:DiP, J5:DiP-A, J5:OT, J5:OT-A, S1:DiP-A, S1:OT, S1:OT-A, S5:DiP, S5:DiP-A, S5:OT, S5:OT-A           |
| 458 | No          | 11      | 11-B | 1000   | McF_4 | 0   | last   | wholeT_0.01 | J1:DiP, J1:DiP-A, J1:OT, J1:OT-A, J5:CBN, J5:DiP, J5:DiP-A, J5:OT, J5:OT-A, S1:DiP, S1:DiP-A, S5:DiP, S5:DiP-A, S5:OT, S5:OT-A                           |
| 459 | No          | 11      | 11-B | 1000   | McF_4 | 0   | last   | wholeT_0.5  | J1:CBN, J1:DiP, J1:DiP-A, J1:OT, J1:OT-A, J5:DiP, J5:DiP-A, J5:OT, J5:OT-A, S1:DiP-A, S1:OT, S1:OT-A, S5:DiP, S5:DiP-A, S5:OT, S5:OT-A                   |
| 460 | No          | 11      | 11-B | 1000   | McF_4 | 0   | unif   | singleC     | J1:CBN, J1:CBN-A, J1:DiP, J1:DiP-A, J1:OT, J1:OT-A, J5:DiP, J5:DiP-A, J5:OT, J5:OT-A, S1:DiP, S1:DiP-A, S1:OT, S1:OT-A, S5:DiP, S5:DiP-A, S5:OT, S5:OT-A |
| 461 | No          | 11      | 11-B | 1000   | McF_4 | 0   | unif   | wholeT_0.01 | J1:CBN-A, J1:DiP, J1:DiP-A, J1:OT, J1:OT-A, J5:DiP, J5:DiP-A, J5:OT, J5:OT-A, S5:DiP, S5:DiP-A, S5:OT, S5:OT-A                                           |
| 462 | No          | 11      | 11-B | 1000   | McF_4 | 0   | unif   | wholeT_0.5  | J1:CBN-A, J1:DiP, J1:DiP-A, J1:OT, J1:OT-A, J5:DiP, J5:DiP-A, J5:OT, J5:OT-A, S1:DiP, S1:DiP-A, S1:OT, S1:OT-A, S5:CBN, S5:DiP, S5:DiP-A, S5:OT, S5:OT-A |
| 463 | No          | 11      | 11-B | 1000   | McF_4 | Inf | last   | singleC     | J1:DiP, J1:DiP-A, J1:OT, J1:OT-A, J5:DiP, J5:DiP-A, J5:OT, J5:OT-A, S5:DiP, S5:DiP-A, S5:OT, S5:OT-A                                                     |
| 464 | No          | 11      | 11-B | 1000   | McF_4 | Inf | last   | wholeT_0.01 | J1:DiP, J1:DiP-A, J1:OT, J1:OT-A, J5:DiP, J5:DiP-A, J5:OT, J5:OT-A, S1:DiP, S1:DiP-A, S5:DiP, S5:DiP-A, S5:OT, S5:OT-A                                   |

Table 16: (continued)

|     | Conjunction | Drivers | Tree | S.Size | Model | sh  | S.Time | S.Type      | Best method(s)                                                                                                                                                     |
|-----|-------------|---------|------|--------|-------|-----|--------|-------------|--------------------------------------------------------------------------------------------------------------------------------------------------------------------|
| 465 | No          | 11      | 11-B | 1000   | McF_4 | Inf | last   | wholeT_0.5  | J1:DiP, J1:DiP-A, J1:OT, J1:OT-A, J5:DiP, J5:DiP-A, J5:OT, J5:OT-A, S1:DiP-A, S1:OT, S1:OT-A, S5:DiP, S5:DiP-A, S5:OT, S5:OT-A                                     |
| 466 | No          | 11      | 11-B | 1000   | McF_4 | Inf | unif   | singleC     | J1:CBN-A, J1:DiP, J1:DiP-A, J1:OT, J1:OT-A, J5:DiP, J5:DiP-A, J5:OT, J5:OT-A, S1:DiP, S1:DiP-A, S1:OT-A, S5:DiP, S5:DiP-A, S5:OT, S5:OT-A                          |
| 467 | No          | 11      | 11-B | 1000   | McF_4 | Inf | unif   | wholeT_0.01 | J1:DiP, J1:DiP-A, J1:OT, J1:OT-A, J5:DiP, J5:DiP-A, J5:OT, J5:OT-A, S5:DiP, S5:DiP-A, S5:OT, S5:OT-A                                                               |
| 468 | No          | 11      | 11-B | 1000   | McF_4 | Inf | unif   | wholeT_0.5  | J1:DiP, J1:DiP-A, J1:OT, J1:OT-A, J5:DiP, J5:DiP-A, J5:OT, J5:OT-A, S1:DiP, S1:DiP-A, S1:OT, S1:OT-A, S5:DiP, S5:DiP-A, S5:OT, S5:OT-A                             |
| 469 | No          | 11      | 11-B | 1000   | McF_6 | 0   | last   | singleC     | J1:DiP, J1:OT, J5:DiP, J5:OT, S1:DiP, S5:DiP, S5:OT                                                                                                                |
| 470 | No          | 11      | 11-B | 1000   | McF_6 | 0   | last   | wholeT_0.01 | J1:DiP, J1:OT, J5:DiP, J5:OT, S1:DiP, S5:DiP, S5:OT                                                                                                                |
| 471 | No          | 11      | 11-B | 1000   | McF_6 | 0   | last   | wholeT_0.5  | J1:DiP, J1:OT, J5:DiP, J5:OT, S1:DiP, S1:OT, S5:DiP, S5:OT                                                                                                         |
| 472 | No          | 11      | 11-B | 1000   | McF_6 | 0   | unif   | singleC     | J1:CBN, J1:CBN-A, J1:DiP, J1:DiP-A, J1:OT, J1:OT-A, J5:CBN-A, J5:DiP, J5:DiP-A, J5:OT, J5:OT-A, S1:DiP, S1:DiP-A, S5:CBN-A, S5:DiP, S5:DiP-A, S5:OT, S5:OT-A       |
| 473 | No          | 11      | 11-B | 1000   | McF_6 | 0   | unif   | wholeT_0.01 | J1:CBN, J1:CBN-A, J1:DiP, J1:DiP-A, J1:OT, J1:OT-A, J5:CBN-A, J5:DiP, J5:DiP-A, J5:OT, J5:OT-A, S1:DiP, S1:DiP-A, S5:DiP, S5:DiP-A, S5:OT, S5:OT-A                 |
| 474 | No          | 11      | 11-B | 1000   | McF_6 | 0   | unif   | wholeT_0.5  | J1:CBN, J1:CBN-A, J1:DiP, J1:DiP-A, J1:OT, J1:OT-A, J5:CBN, J5:CBN-A, J5:DiP, J5:DiP-A, J5:OT, J5:OT-A, S1:DiP, S1:DiP-A, S5:CBN, S5:DiP, S5:DiP-A, S5:OT, S5:OT-A |
| 475 | No          | 11      | 11-B | 1000   | McF_6 | Inf | last   | singleC     | J1:DiP, J1:OT, J5:DiP, J5:OT, S1:DiP, S5:DiP, S5:OT                                                                                                                |
| 476 | No          | 11      | 11-B | 1000   | McF_6 | Inf | last   | wholeT_0.01 | J1:DiP, J1:OT, J5:DiP, J5:OT, S1:DiP, S5:DiP, S5:OT                                                                                                                |

Table 16: (continued)

|     | Conjunction | Drivers | Tree | S.Size | Model | sh  | S.Time | S.Type      | Best method(s)                                                                                                                                           |
|-----|-------------|---------|------|--------|-------|-----|--------|-------------|----------------------------------------------------------------------------------------------------------------------------------------------------------|
| 477 | No          | 11      | 11-B | 1000   | McF_6 | Inf | last   | wholeT_0.5  | J1:DiP, J1:OT, J5:DiP, J5:OT, S1:DiP, S5:DiP, S5:OT                                                                                                      |
| 478 | No          | 11      | 11-B | 1000   | McF_6 | Inf | unif   | singleC     | J1:CBN-A, J1:DiP, J1:DiP-A, J1:OT, J5:CBN-A, J5:DiP, J5:DiP-A, J5:OT, J5:OT-A, S1:DiP, S1:DiP-A, S5:CBN, S5:CBN-A, S5:DiP, S5:DiP-A, S5:OT, S5:OT-A      |
| 479 | No          | 11      | 11-B | 1000   | McF_6 | Inf | unif   | wholeT_0.01 | J1:CBN-A, J1:DiP, J1:DiP-A, J1:OT, J5:CBN-A, J5:DiP, J5:DiP-A, J5:OT, J5:OT-A, S1:DiP, S1:DiP-A, S5:CBN, S5:DiP, S5:DiP-A, S5:OT, S5:OT-A                |
| 480 | No          | 11      | 11-B | 1000   | McF_6 | Inf | unif   | wholeT_0.5  | J1:CBN, J1:CBN-A, J1:DiP, J1:DiP-A, J1:OT, J1:OT-A, J5:DiP, J5:DiP-A, J5:OT, S1:DiP, S1:DiP-A, S5:CBN, S5:DiP, S5:DiP-A, S5:OT                           |
| 481 | No          | 11      | 11-B | 200    | Bozic | 0   | last   | singleC     | J1:DiP, J1:DiP-A, J1:OT, J1:OT-A, J5:DiP, J5:DiP-A, J5:OT, J5:OT-A, S1:DiP, S5:DiP, S5:DiP-A, S5:OT, S5:OT-A                                             |
| 482 | No          | 11      | 11-B | 200    | Bozic | 0   | last   | wholeT_0.01 | J1:DiP, J5:DiP                                                                                                                                           |
| 483 | No          | 11      | 11-B | 200    | Bozic | 0   | last   | wholeT_0.5  | J1:DiP, J1:DiP-A, J1:OT, J1:OT-A, J5:DiP, J5:DiP-A, J5:OT, J5:OT-A, S1:DiP, S1:DiP-A, S5:DiP, S5:DiP-A, S5:OT, S5:OT-A                                   |
| 484 | No          | 11      | 11-B | 200    | Bozic | 0   | unif   | singleC     | J1:DiP, J1:DiP-A, J1:OT, J1:OT-A, J5:CBN, J5:CBN-A, J5:DiP, J5:DiP-A, J5:OT, J5:OT-A, S1:DiP, S1:DiP-A, S1:OT, S1:OT-A, S5:DiP, S5:DiP-A, S5:OT, S5:OT-A |
| 485 | No          | 11      | 11-B | 200    | Bozic | 0   | unif   | wholeT_0.01 | J5:DiP, J5:DiP-A, J5:OT, J5:OT-A, S5:OT-A                                                                                                                |
| 486 | No          | 11      | 11-B | 200    | Bozic | 0   | unif   | wholeT_0.5  | J1:CBN-A, J1:DiP, J1:DiP-A, J1:OT, J1:OT-A, J5:CBN, J5:CBN-A, J5:DiP, J5:DiP-A, J5:OT-A, S1:DiP, S1:DiP-A, S1:OT, S5:DiP, S5:DiP-A, S5:OT, S5:OT-A       |
| 487 | No          | 11      | 11-B | 200    | Bozic | Inf | last   | singleC     | J1:DiP, J1:DiP-A, J5:DiP, J5:DiP-A, J5:OT, J5:OT-A, S5:DiP, S5:DiP-A, S5:OT                                                                              |
| 488 | No          | 11      | 11-B | 200    | Bozic | Inf | last   | wholeT_0.01 | J5:DiP, J5:DiP-A, J5:OT, J5:OT-A                                                                                                                         |

Table 16: (continued)

|     | Conjunction | Drivers | Tree | S.Size | Model | sh  | S.Time | S.Type      | Best method(s)                                                                                                                                                             |
|-----|-------------|---------|------|--------|-------|-----|--------|-------------|----------------------------------------------------------------------------------------------------------------------------------------------------------------------------|
| 489 | No          | 11      | 11-B | 200    | Bozic | Inf | last   | wholeT_0.5  | J1:DiP, J1:DiP-A, J5:DiP, J5:DiP-A, J5:OT, J5:OT-A, S5:DiP, S5:DiP-A, S5:OT, S5:OT-A                                                                                       |
| 490 | No          | 11      | 11-B | 200    | Bozic | Inf | unif   | singleC     | J1:CBN-A, J1:DiP, J1:DiP-A, J5:DiP, J5:DiP-A, J5:OT, J5:OT-A, S5:DiP, S5:DiP-A, S5:OT, S5:OT-A                                                                             |
| 491 | No          | 11      | 11-B | 200    | Bozic | Inf | unif   | wholeT_0.01 | J5:CBN-A, J5:DiP, J5:DiP-A, J5:OT, J5:OT-A                                                                                                                                 |
| 492 | No          | 11      | 11-B | 200    | Bozic | Inf | unif   | wholeT_0.5  | J1:DiP, J1:OT-A, J5:DiP, J5:DiP-A, J5:OT, J5:OT-A, S5:DiP, S5:DiP-A, S5:OT, S5:OT-A                                                                                        |
| 493 | No          | 11      | 11-B | 200    | exp   | 0   | last   | singleC     | J1:DiP, J1:DiP-A, J1:OT, J1:OT-A, J5:CBN, J5:CBN-A, J5:DiP, J5:DiP-A, J5:OT, J5:OT-A, S1:DiP, S1:DiP-A, S1:OT, S1:OT-A, S5:DiP, S5:DiP-A, S5:OT, S5:OT-A                   |
| 494 | No          | 11      | 11-B | 200    | exp   | 0   | last   | wholeT_0.01 | J1:DiP, J1:DiP-A, J1:OT, J1:OT-A, J5:DiP, J5:DiP-A, J5:OT, J5:OT-A, S1:OT, S1:OT-A, S5:DiP, S5:DiP-A, S5:OT, S5:OT-A                                                       |
| 495 | No          | 11      | 11-B | 200    | exp   | 0   | last   | wholeT_0.5  | J1:DiP, J1:DiP-A, J1:OT, J1:OT-A, J5:CBN, J5:CBN-A, J5:DiP, J5:DiP-A, J5:OT, J5:OT-A, S1:DiP, S1:DiP-A, S1:OT, S1:OT-A, S5:DiP, S5:DiP-A, S5:OT, S5:OT-A                   |
| 496 | No          | 11      | 11-B | 200    | exp   | 0   | unif   | singleC     | J1:CBN, J1:CBN-A, J1:DiP, J1:DiP-A, J1:OT, J1:OT-A, J5:CBN, J5:CBN-A, J5:DiP, J5:DiP-A, J5:OT, J5:OT-A, S1:DiP, S1:DiP-A, S1:OT, S1:OT-A, S5:DiP, S5:DiP-A, S5:OT, S5:OT-A |
| 497 | No          | 11      | 11-B | 200    | exp   | 0   | unif   | wholeT_0.01 | J1:DiP, J1:DiP-A, J1:OT, J1:OT-A, J5:CBN, J5:CBN-A, J5:DiP, J5:DiP-A, J5:OT, J5:OT-A, S1:DiP, S1:DiP-A, S1:OT, S1:OT-A, S5:DiP, S5:DiP-A, S5:OT, S5:OT-A                   |
| 498 | No          | 11      | 11-B | 200    | exp   | 0   | unif   | wholeT_0.5  | J1:CBN, J1:CBN-A, J1:DiP, J1:DiP-A, J1:OT, J1:OT-A, J5:CBN, J5:CBN-A, J5:DiP, J5:DiP-A, J5:OT, J5:OT-A, S1:DiP, S1:DiP-A, S1:OT, S1:OT-A, S5:DiP, S5:DiP-A, S5:OT, S5:OT-A |

Table 16: (continued)

|     | Conjunction | Drivers | Tree | S.Size | Model | sh  | S.Time | S.Type      | Best method(s)                                                                                                                   |
|-----|-------------|---------|------|--------|-------|-----|--------|-------------|----------------------------------------------------------------------------------------------------------------------------------|
| 499 | No          | 11      | 11-B | 200    | exp   | Inf | last   | singleC     | J1:DiP, J1:DiP-A, J1:OT-A, J5:DiP, J5:DiP-A, J5:OT, J5:OT-A, S1:DiP, S1:DiP-A, S5:DiP, S5:DiP-A, S5:OT, S5:OT-A                  |
| 500 | No          | 11      | 11-B | 200    | exp   | Inf | last   | wholeT_0.01 | J5:DiP, J5:DiP-A, J5:OT, J5:OT-A                                                                                                 |
| 501 | No          | 11      | 11-B | 200    | exp   | Inf | last   | wholeT_0.5  | J1:DiP, J1:DiP-A, J1:OT, J1:OT-A, J5:DiP, J5:DiP-A, J5:OT, J5:OT-A, S1:DiP, S1:DiP-A, S5:DiP, S5:DiP-A, S5:OT, S5:OT-A           |
| 502 | No          | 11      | 11-B | 200    | exp   | Inf | unif   | singleC     | J1:DiP, J1:DiP-A, J1:OT, J1:OT-A, J5:CBN, J5:CBN-A, J5:DiP, J5:DiP-A, J5:OT-A, S5:DiP, S5:DiP-A, S5:OT, S5:OT-A                  |
| 503 | No          | 11      | 11-B | 200    | exp   | Inf | unif   | wholeT_0.01 | J5:DiP, J5:DiP-A, J5:OT, J5:OT-A, S5:OT-A                                                                                        |
| 504 | No          | 11      | 11-B | 200    | exp   | Inf | unif   | wholeT_0.5  | J1:DiP, J1:DiP-A, J1:OT, J1:OT-A, J5:CBN, J5:DiP, J5:DiP-A, J5:OT, J5:OT-A, S1:DiP-A, S5:DiP, S5:DiP-A, S5:OT, S5:OT-A           |
| 505 | No          | 11      | 11-B | 200    | McF_4 | 0   | last   | singleC     | J1:DiP, J1:DiP-A, J1:OT-A, J5:DiP, J5:DiP-A, J5:OT, J5:OT-A, S5:OT, S5:OT-A                                                      |
| 506 | No          | 11      | 11-B | 200    | McF_4 | 0   | last   | wholeT_0.01 | J1:DiP, J1:DiP-A, J1:OT, J1:OT-A, J5:DiP-A, J5:OT, J5:OT-A, S1:DiP, S1:DiP-A, S5:DiP, S5:DiP-A, S5:OT, S5:OT-A                   |
| 507 | No          | 11      | 11-B | 200    | McF_4 | 0   | last   | wholeT_0.5  | J1:DiP, J1:DiP-A, J1:OT, J1:OT-A, J5:DiP, J5:DiP-A, J5:OT, J5:OT-A, S5:DiP, S5:DiP-A, S5:OT, S5:OT-A                             |
| 508 | No          | 11      | 11-B | 200    | McF_4 | 0   | unif   | singleC     | J1:CBN, J1:CBN-A, J1:DiP, J1:DiP-A, J1:OT, J1:OT-A, J5:DiP, J5:DiP-A, J5:OT, J5:OT-A, S5:CBN-A, S5:DiP, S5:DiP-A, S5:OT, S5:OT-A |
| 509 | No          | 11      | 11-B | 200    | McF_4 | 0   | unif   | wholeT_0.01 | J1:CBN-A, J1:DiP, J1:DiP-A, J1:OT, J1:OT-A, J5:DiP, J5:DiP-A, J5:OT, J5:OT-A, S1:DiP-A, S5:DiP, S5:DiP-A, S5:OT, S5:OT-A         |

Table 16: (continued)

|     | Conjunction | Drivers | Tree | S.Size | Model | sh  | S.Time | S.Type      | Best method(s)                                                                                                                           |
|-----|-------------|---------|------|--------|-------|-----|--------|-------------|------------------------------------------------------------------------------------------------------------------------------------------|
| 510 | No          | 11      | 11-B | 200    | McF_4 | 0   | unif   | wholeT_0.5  | J1:CBN-A, J1:DiP, J1:DiP-A, J1:OT, J1:OT-A, J5:DiP, J5:DiP-A, J5:OT, J5:OT-A, S1:DiP, S5:CBN-A, S5:DiP, S5:DiP-A, S5:OT-A                |
| 511 | No          | 11      | 11-B | 200    | McF_4 | Inf | last   | singleC     | J1:DiP, J1:DiP-A, J1:OT, J1:OT-A, J5:DiP, J5:DiP-A, J5:OT, J5:OT-A, S5:OT, S5:OT-A                                                       |
| 512 | No          | 11      | 11-B | 200    | McF_4 | Inf | last   | wholeT_0.01 | J1:DiP, J1:DiP-A, J5:DiP, J5:DiP-A, J5:OT, J5:OT-A, S1:DiP-A, S5:DiP, S5:DiP-A, S5:OT, S5:OT-A                                           |
| 513 | No          | 11      | 11-B | 200    | McF_4 | Inf | last   | wholeT_0.5  | J1:DiP, J1:DiP-A, J1:OT, J1:OT-A, J5:DiP, J5:DiP-A, J5:OT, J5:OT-A, S1:DiP, S1:DiP-A, S5:DiP, S5:DiP-A, S5:OT, S5:OT-A                   |
| 514 | No          | 11      | 11-B | 200    | McF_4 | Inf | unif   | singleC     | J1:CBN-A, J1:DiP, J1:DiP-A, J1:OT, J1:OT-A, J5:DiP, J5:DiP-A, J5:OT, J5:OT-A, S1:DiP, S5:CBN-A, S5:DiP, S5:OT-A                          |
| 515 | No          | 11      | 11-B | 200    | McF_4 | Inf | unif   | wholeT_0.01 | J1:DiP, J1:DiP-A, J1:OT, J1:OT-A, J5:DiP, J5:DiP-A, J5:OT, J5:OT-A, S1:DiP-A, S5:DiP, S5:DiP-A, S5:OT, S5:OT-A                           |
| 516 | No          | 11      | 11-B | 200    | McF_4 | Inf | unif   | wholeT_0.5  | J1:CBN-A, J1:DiP, J1:DiP-A, J1:OT, J1:OT-A, J5:DiP, J5:DiP-A, J5:OT, J5:OT-A, S1:DiP, S5:DiP, S5:DiP-A, S5:OT, S5:OT-A                   |
| 517 | No          | 11      | 11-B | 200    | McF_6 | 0   | last   | singleC     | J1:DiP, J1:OT, J5:DiP, J5:OT, S1:DiP, S5:DiP, S5:OT                                                                                      |
| 518 | No          | 11      | 11-B | 200    | McF_6 | 0   | last   | wholeT_0.01 | J1:DiP, J1:OT, J5:DiP, J5:OT, S1:DiP, S5:DiP, S5:OT                                                                                      |
| 519 | No          | 11      | 11-B | 200    | McF_6 | 0   | last   | wholeT_0.5  | J1:DiP, J1:OT, J5:DiP, J5:OT, S1:DiP, S5:DiP, S5:OT                                                                                      |
| 520 | No          | 11      | 11-B | 200    | McF_6 | 0   | unif   | singleC     | J1:CBN, J1:CBN-A, J1:DiP-A, J1:OT-A, J5:CBN, J5:CBN-A, J5:DiP, J5:DiP-A, J5:OT, J5:OT-A, S5:CBN-A, S5:OT                                 |
| 521 | No          | 11      | 11-B | 200    | McF_6 | 0   | unif   | wholeT_0.01 | J1:CBN, J1:CBN-A, J1:DiP, J1:DiP-A, J1:OT, J1:OT-A, J5:CBN, J5:CBN-A, J5:DiP, J5:DiP-A, J5:OT, J5:OT-A, S5:DiP, S5:DiP-A, S5:OT, S5:OT-A |

Table 16: (continued)

|     | Conjunction | Drivers | Tree | S.Size | Model | sh  | S.Time | S.Type      | Best method(s)                                                                                                           |
|-----|-------------|---------|------|--------|-------|-----|--------|-------------|--------------------------------------------------------------------------------------------------------------------------|
| 522 | No          | 11      | 11-B | 200    | McF_6 | 0   | unif   | wholeT_0.5  | J1:CBN, J1:CBN-A, J1:DiP, J1:OT, J1:OT-A, J5:CBN, J5:CBN-A, J5:DiP, J5:OT, J5:OT-A, S5:OT                                |
| 523 | No          | 11      | 11-B | 200    | McF_6 | Inf | last   | singleC     | J1:DiP, J1:OT, J5:DiP, J5:OT, S1:DiP, S5:DiP, S5:OT                                                                      |
| 524 | No          | 11      | 11-B | 200    | McF_6 | Inf | last   | wholeT_0.01 | J1:DiP, J5:DiP, J5:OT, S1:DiP, S5:DiP, S5:OT                                                                             |
| 525 | No          | 11      | 11-B | 200    | McF_6 | Inf | last   | wholeT_0.5  | J1:DiP, J1:OT, J5:DiP, J5:OT, S1:DiP, S5:DiP, S5:OT                                                                      |
| 526 | No          | 11      | 11-B | 200    | McF_6 | Inf | unif   | singleC     | J1:CBN-A, J1:OT, J1:OT-A, J5:CBN-A, J5:DiP, J5:DiP-A, J5:OT, J5:OT-A, S5:CBN-A, S5:OT                                    |
| 527 | No          | 11      | 11-B | 200    | McF_6 | Inf | unif   | wholeT_0.01 | J1:CBN-A, J1:DiP, J1:OT, J1:OT-A, J5:CBN-A, J5:DiP, J5:DiP-A, J5:OT, J5:OT-A, S5:OT, S5:OT-A                             |
| 528 | No          | 11      | 11-B | 200    | McF_6 | Inf | unif   | wholeT_0.5  | J1:CBN, J1:CBN-A, J5:CBN-A, J5:DiP, J5:DiP-A, J5:OT, J5:OT-A, S5:CBN, S5:CBN-A                                           |
| 529 | No          | 11      | 11-B | 100    | Bozic | 0   | last   | singleC     | J1:DiP, J1:DiP-A, J5:DiP, J5:DiP-A, J5:OT, J5:OT-A, S1:DiP, S1:DiP-A, S5:DiP, S5:DiP-A, S5:OT, S5:OT-A                   |
| 530 | No          | 11      | 11-B | 100    | Bozic | 0   | last   | wholeT_0.01 | J1:DiP, J1:DiP-A, J5:DiP, J5:DiP-A, J5:OT, J5:OT-A                                                                       |
| 531 | No          | 11      | 11-B | 100    | Bozic | 0   | last   | wholeT_0.5  | J1:DiP, J1:DiP-A, J5:DiP, J5:DiP-A, J5:OT, J5:OT-A, S1:DiP, S1:DiP-A, S5:DiP, S5:DiP-A, S5:OT-A                          |
| 532 | No          | 11      | 11-B | 100    | Bozic | 0   | unif   | singleC     | J1:DiP, J1:DiP-A, J5:CBN, J5:CBN-A, J5:DiP, J5:DiP-A, J5:OT, J5:OT-A, S1:DiP, S1:DiP-A, S5:DiP, S5:DiP-A, S5:OT, S5:OT-A |
| 533 | No          | 11      | 11-B | 100    | Bozic | 0   | unif   | wholeT_0.01 | J5:DiP, J5:DiP-A, J5:OT, J5:OT-A, S5:DiP-A, S5:OT, S5:OT-A                                                               |
| 534 | No          | 11      | 11-B | 100    | Bozic | 0   | unif   | wholeT_0.5  | J1:DiP, J1:DiP-A, J5:CBN, J5:CBN-A, J5:DiP, J5:DiP-A, J5:OT, J5:OT-A, S1:DiP, S1:DiP-A, S5:DiP, S5:DiP-A, S5:OT, S5:OT-A |
| 535 | No          | 11      | 11-B | 100    | Bozic | Inf | last   | singleC     | J1:DiP, J5:DiP, J5:DiP-A, J5:OT, J5:OT-A, S5:DiP, S5:DiP-A                                                               |
| 536 | No          | 11      | 11-B | 100    | Bozic | Inf | last   | wholeT_0.01 | J5:DiP, J5:DiP-A, J5:OT, J5:OT-A                                                                                         |

Table 16: (continued)

|     | Conjunction | Drivers | Tree | S.Size | Model | sh  | S.Time | S.Type      | Best method(s)                                                                                                                                          |
|-----|-------------|---------|------|--------|-------|-----|--------|-------------|---------------------------------------------------------------------------------------------------------------------------------------------------------|
| 537 | No          | 11      | 11-B | 100    | Bozic | Inf | last   | wholeT_0.5  | J1:DiP, J1:DiP-A, J5:DiP, J5:DiP-A, J5:OT, J5:OT-A, S1:DiP, S1:DiP-A, S5:DiP, S5:DiP-A                                                                  |
| 538 | No          | 11      | 11-B | 100    | Bozic | Inf | unif   | singleC     | J1:DiP, J5:DiP, J5:DiP-A, J5:OT, J5:OT-A, S5:DiP, S5:DiP-A, S5:OT, S5:OT-A                                                                              |
| 539 | No          | 11      | 11-B | 100    | Bozic | Inf | unif   | wholeT_0.01 | J5:DiP, J5:DiP-A, J5:OT, J5:OT-A                                                                                                                        |
| 540 | No          | 11      | 11-B | 100    | Bozic | Inf | unif   | wholeT_0.5  | J1:DiP, J1:DiP-A, J5:DiP, J5:DiP-A, J5:OT, J5:OT-A, S5:DiP, S5:DiP-A, S5:OT, S5:OT-A                                                                    |
| 541 | No          | 11      | 11-B | 100    | exp   | 0   | last   | singleC     | J1:DiP-A, J1:OT, J1:OT-A, J5:CBN, J5:CBN-A, J5:DiP, J5:DiP-A, J5:OT, J5:OT-A, S1:DiP, S1:DiP-A, S1:OT-A, S5:DiP, S5:DiP-A, S5:OT, S5:OT-A               |
| 542 | No          | 11      | 11-B | 100    | exp   | 0   | last   | wholeT_0.01 | J1:DiP, J1:DiP-A, J1:OT, J1:OT-A, J5:DiP, J5:DiP-A, J5:OT, J5:OT-A, S1:DiP, S1:DiP-A, S5:DiP, S5:DiP-A, S5:OT                                           |
| 543 | No          | 11      | 11-B | 100    | exp   | 0   | last   | wholeT_0.5  | J1:DiP, J1:DiP-A, J1:OT, J1:OT-A, J5:CBN, J5:CBN-A, J5:DiP, J5:DiP-A, J5:OT, J5:OT-A, S1:DiP, S1:DiP-A, S1:OT-A, S5:DiP, S5:DiP-A, S5:OT, S5:OT-A       |
| 544 | No          | 11      | 11-B | 100    | exp   | 0   | unif   | singleC     | J1:DiP, J1:DiP-A, J1:OT-A, J5:CBN, J5:CBN-A, J5:DiP, J5:DiP-A, J5:OT, J5:OT-A, S1:DiP, S1:DiP-A, S5:DiP, S5:DiP-A, S5:OT, S5:OT-A                       |
| 545 | No          | 11      | 11-B | 100    | exp   | 0   | unif   | wholeT_0.01 | J1:DiP, J1:DiP-A, J1:OT, J5:CBN, J5:CBN-A, J5:DiP, J5:DiP-A, J5:OT, J5:OT-A, S1:DiP, S1:DiP-A, S5:DiP, S5:DiP-A, S5:OT, S5:OT-A                         |
| 546 | No          | 11      | 11-B | 100    | exp   | 0   | unif   | wholeT_0.5  | J1:CBN, J1:CBN-A, J1:DiP, J1:OT, J1:OT-A, J5:CBN, J5:CBN-A, J5:DiP, J5:DiP-A, J5:OT, J5:OT-A, S1:DiP, S1:DiP-A, S1:OT, S5:DiP, S5:DiP-A, S5:OT, S5:OT-A |
| 547 | No          | 11      | 11-B | 100    | exp   | Inf | last   | singleC     | J1:DiP, J1:DiP-A, J5:DiP, J5:DiP-A, J5:OT, J5:OT-A, S1:DiP, S1:DiP-A, S5:DiP, S5:DiP-A, S5:OT, S5:OT-A                                                  |
| 548 | No          | 11      | 11-B | 100    | exp   | Inf | last   | wholeT_0.01 | J5:CBN-A, J5:DiP, J5:DiP-A, J5:OT, J5:OT-A                                                                                                              |



Table 16: (continued)

|     | Conjunction | Drivers | Tree | S.Size | Model | sh  | S.Time | S.Type      | Best method(s)                                                                                                           |
|-----|-------------|---------|------|--------|-------|-----|--------|-------------|--------------------------------------------------------------------------------------------------------------------------|
| 549 | No          | 11      | 11-B | 100    | exp   | Inf | last   | wholeT_0.5  | J1:DiP, J1:DiP-A, J5:DiP, J5:DiP-A, J5:OT, J5:OT-A, S1:DiP, S1:DiP-A, S5:DiP, S5:DiP-A, S5:OT, S5:OT-A                   |
| 550 | No          | 11      | 11-B | 100    | exp   | Inf | unif   | singleC     | J1:DiP, J1:DiP-A, J5:DiP, J5:DiP-A, J5:OT, J5:OT-A, S1:DiP, S5:DiP, S5:DiP-A, S5:OT, S5:OT-A                             |
| 551 | No          | 11      | 11-B | 100    | exp   | Inf | unif   | wholeT_0.01 | J5:DiP, J5:DiP-A, J5:OT, J5:OT-A, S5:DiP, S5:DiP-A, S5:OT, S5:OT-A                                                       |
| 552 | No          | 11      | 11-B | 100    | exp   | Inf | unif   | wholeT_0.5  | J1:DiP, J1:DiP-A, J5:CBN, J5:CBN-A, J5:DiP, J5:DiP-A, J5:OT, J5:OT-A, S1:DiP-A, S5:DiP, S5:DiP-A, S5:OT, S5:OT-A         |
| 553 | No          | 11      | 11-B | 100    | McF_4 | 0   | last   | singleC     | J1:DiP, J1:DiP-A, J5:DiP, J5:DiP-A, J5:OT, J5:OT-A, S1:DiP, S1:DiP-A, S5:DiP, S5:DiP-A, S5:OT, S5:OT-A                   |
| 554 | No          | 11      | 11-B | 100    | McF_4 | 0   | last   | wholeT_0.01 | J1:DiP, J1:DiP-A, J5:DiP, J5:DiP-A, J5:OT, J5:OT-A, S1:DiP, S1:DiP-A, S5:DiP, S5:DiP-A, S5:OT                            |
| 555 | No          | 11      | 11-B | 100    | McF_4 | 0   | last   | wholeT_0.5  | J1:DiP, J1:DiP-A, J5:DiP, J5:DiP-A, J5:OT, J5:OT-A, S1:DiP, S1:DiP-A, S5:DiP, S5:DiP-A, S5:OT, S5:OT-A                   |
| 556 | No          | 11      | 11-B | 100    | McF_4 | 0   | unif   | singleC     | J1:DiP, J1:DiP-A, J1:OT, J1:OT-A, J5:DiP, J5:DiP-A, J5:OT, J5:OT-A, S1:DiP, S1:DiP-A, S5:DiP, S5:DiP-A, S5:OT, S5:OT-A   |
| 557 | No          | 11      | 11-B | 100    | McF_4 | 0   | unif   | wholeT_0.01 | J1:DiP, J1:DiP-A, J5:DiP, J5:DiP-A, J5:OT, J5:OT-A, S5:DiP, S5:DiP-A, S5:OT-A                                            |
| 558 | No          | 11      | 11-B | 100    | McF_4 | 0   | unif   | wholeT_0.5  | J1:CBN-A, J1:DiP, J1:DiP-A, J1:OT, J1:OT-A, J5:DiP-A, J5:OT, J5:OT-A, S1:DiP, S1:DiP-A, S5:DiP, S5:DiP-A, S5:OT, S5:OT-A |
| 559 | No          | 11      | 11-B | 100    | McF_4 | Inf | last   | singleC     | J1:DiP, J1:DiP-A, J5:DiP, J5:DiP-A, J5:OT, J5:OT-A, S1:DiP, S5:DiP, S5:DiP-A, S5:OT                                      |
| 560 | No          | 11      | 11-B | 100    | McF_4 | Inf | last   | wholeT_0.01 | J1:DiP, J5:DiP, J5:DiP-A, J5:OT, J5:OT-A, S1:DiP-A, S5:DiP, S5:DiP-A, S5:OT-A                                            |
| 561 | No          | 11      | 11-B | 100    | McF_4 | Inf | last   | wholeT_0.5  | J1:DiP, J1:DiP-A, J5:DiP, J5:DiP-A, J5:OT, J5:OT-A, S1:DiP, S5:DiP, S5:DiP-A, S5:OT, S5:OT-A                             |

Table 16: (continued)

|     | Conjunction | Drivers | Tree | S.Size | Model | sh  | S.Time | S.Type      | Best method(s)                                                                                                                                                                 |
|-----|-------------|---------|------|--------|-------|-----|--------|-------------|--------------------------------------------------------------------------------------------------------------------------------------------------------------------------------|
| 562 | No          | 11      | 11-B | 100    | McF_4 | Inf | unif   | singleC     | J1:DiP, J1:DiP-A, J1:OT, J5:DiP, J5:DiP-A, J5:OT, J5:OT-A, S1:DiP, S1:DiP-A, S5:DiP, S5:DiP-A, S5:OT, S5:OT-A                                                                  |
| 563 | No          | 11      | 11-B | 100    | McF_4 | Inf | unif   | wholeT_0.01 | J1:DiP, J1:DiP-A, J5:DiP, J5:DiP-A, J5:OT, J5:OT-A, S5:DiP, S5:DiP-A, S5:OT-A                                                                                                  |
| 564 | No          | 11      | 11-B | 100    | McF_4 | Inf | unif   | wholeT_0.5  | J1:DiP, J1:DiP-A, J5:DiP, J5:DiP-A, J5:OT, S5:DiP-A                                                                                                                            |
| 565 | No          | 11      | 11-B | 100    | McF_6 | 0   | last   | singleC     | J1:DiP, J1:OT, J5:DiP, J5:OT, S1:DiP                                                                                                                                           |
| 566 | No          | 11      | 11-B | 100    | McF_6 | 0   | last   | wholeT_0.01 | J1:DiP, J5:DiP, J5:OT, S5:DiP                                                                                                                                                  |
| 567 | No          | 11      | 11-B | 100    | McF_6 | 0   | last   | wholeT_0.5  | J1:DiP, J1:OT, J5:DiP, J5:OT, S1:DiP, S5:DiP                                                                                                                                   |
| 568 | No          | 11      | 11-B | 100    | McF_6 | 0   | unif   | singleC     | J1:CBN, J1:CBN-A, J5:CBN, J5:CBN-A, J5:DiP, J5:OT, J5:OT-A                                                                                                                     |
| 569 | No          | 11      | 11-B | 100    | McF_6 | 0   | unif   | wholeT_0.01 | J1:DiP-A, J5:CBN, J5:CBN-A, J5:DiP, J5:DiP-A, J5:OT, J5:OT-A                                                                                                                   |
| 570 | No          | 11      | 11-B | 100    | McF_6 | 0   | unif   | wholeT_0.5  | J1:CBN-A, J1:DiP, J5:CBN, J5:CBN-A, J5:DiP, J5:DiP-A, J5:OT, J5:OT-A, S5:CBN-A                                                                                                 |
| 571 | No          | 11      | 11-B | 100    | McF_6 | Inf | last   | singleC     | J1:DiP, J5:DiP, J5:OT, S5:DiP                                                                                                                                                  |
| 572 | No          | 11      | 11-B | 100    | McF_6 | Inf | last   | wholeT_0.01 | J1:DiP, J5:DiP, S1:DiP, S5:DiP                                                                                                                                                 |
| 573 | No          | 11      | 11-B | 100    | McF_6 | Inf | last   | wholeT_0.5  | J1:DiP, J5:DiP, J5:DiP-A, J5:OT                                                                                                                                                |
| 574 | No          | 11      | 11-B | 100    | McF_6 | Inf | unif   | singleC     | J1:CBN-A, J5:CBN-A, J5:DiP, J5:OT, J5:OT-A, S5:CBN                                                                                                                             |
| 575 | No          | 11      | 11-B | 100    | McF_6 | Inf | unif   | wholeT_0.01 | J5:CBN-A, J5:DiP, J5:DiP-A, J5:OT, J5:OT-A                                                                                                                                     |
| 576 | No          | 11      | 11-B | 100    | McF_6 | Inf | unif   | wholeT_0.5  | J5:CBN-A, J5:DiP, J5:OT, J5:OT-A                                                                                                                                               |
| 577 | No          | 9       | 9-B  | 1000   | Bozic | 0   | last   | singleC     | J1:DiP, J1:DiP-A, J1:OT, J1:OT-A, J5:DiP, J5:DiP-A, J5:OT, J5:OT-A, S1:OT, S1:OT-A, S5:DiP, S5:OT, S5:OT-A                                                                     |
| 578 | No          | 9       | 9-B  | 1000   | Bozic | 0   | last   | wholeT_0.01 | J1:CBN-A, J1:DiP, J1:DiP-A, J1:OT, J1:OT-A, J5:CBN-A, J5:DiP, J5:DiP-A, J5:OT, J5:OT-A, S1:CBN-A, S1:DiP, S1:DiP-A, S1:OT, S1:OT-A, S5:CBN-A, S5:DiP, S5:DiP-A, S5:OT, S5:OT-A |

Table 16: (continued)

|     | Conjunction | Drivers | Tree | S.Size | Model | sh  | S.Time | S.Type      | Best method(s)                                                                                                                                           |
|-----|-------------|---------|------|--------|-------|-----|--------|-------------|----------------------------------------------------------------------------------------------------------------------------------------------------------|
| 579 | No          | 9       | 9-B  | 1000   | Bozic | 0   | last   | wholeT_0.5  | J1:DiP, J1:DiP-A, J1:OT, J1:OT-A, J5:CBN, J5:CBN-A, J5:DiP, J5:DiP-A, J5:OT, J5:OT-A, S1:OT, S1:OT-A, S5:DiP, S5:DiP-A, S5:OT, S5:OT-A                   |
| 580 | No          | 9       | 9-B  | 1000   | Bozic | 0   | unif   | singleC     | J1:DiP, J1:DiP-A, J1:OT, J1:OT-A, J5:CBN, J5:CBN-A, J5:DiP, J5:DiP-A, J5:OT, J5:OT-A, S1:DiP, S1:DiP-A, S1:OT, S1:OT-A, S5:DiP, S5:DiP-A, S5:OT-A        |
| 581 | No          | 9       | 9-B  | 1000   | Bozic | 0   | unif   | wholeT_0.01 | J5:DiP, J5:DiP-A, J5:OT, J5:OT-A, S5:DiP, S5:DiP-A, S5:OT, S5:OT-A                                                                                       |
| 582 | No          | 9       | 9-B  | 1000   | Bozic | 0   | unif   | wholeT_0.5  | J1:CBN, J1:CBN-A, J1:DiP, J1:DiP-A, J1:OT, J1:OT-A, J5:CBN-A, J5:DiP-A, J5:OT, S1:DiP, S1:DiP-A, S1:OT, S1:OT-A, S5:DiP, S5:DiP-A, S5:OT, S5:OT-A        |
| 583 | No          | 9       | 9-B  | 1000   | Bozic | Inf | last   | singleC     | J1:DiP, J1:DiP-A, J1:OT, J1:OT-A, J5:DiP, J5:DiP-A, J5:OT, J5:OT-A, S1:DiP, S5:DiP, S5:DiP-A, S5:OT, S5:OT-A                                             |
| 584 | No          | 9       | 9-B  | 1000   | Bozic | Inf | last   | wholeT_0.01 | J5:DiP, J5:DiP-A                                                                                                                                         |
| 585 | No          | 9       | 9-B  | 1000   | Bozic | Inf | last   | wholeT_0.5  | J1:DiP, J1:DiP-A, J1:OT, J1:OT-A, J5:DiP, J5:DiP-A, J5:OT, J5:OT-A, S1:DiP, S1:DiP-A, S5:DiP, S5:DiP-A, S5:OT, S5:OT-A                                   |
| 586 | No          | 9       | 9-B  | 1000   | Bozic | Inf | unif   | singleC     | J1:DiP, J1:DiP-A, J1:OT, J1:OT-A, J5:DiP, J5:DiP-A, J5:OT, J5:OT-A, S5:DiP, S5:DiP-A, S5:OT, S5:OT-A                                                     |
| 587 | No          | 9       | 9-B  | 1000   | Bozic | Inf | unif   | wholeT_0.01 | J1:CBN-A, J5:DiP, J5:DiP-A, J5:OT, J5:OT-A                                                                                                               |
| 588 | No          | 9       | 9-B  | 1000   | Bozic | Inf | unif   | wholeT_0.5  | J1:DiP, J1:DiP-A, J1:OT, J1:OT-A, J5:CBN, J5:CBN-A, J5:DiP, J5:DiP-A, J5:OT, J5:OT-A, S5:DiP, S5:DiP-A, S5:OT, S5:OT-A                                   |
| 589 | No          | 9       | 9-B  | 1000   | exp   | 0   | last   | singleC     | J1:DiP, J1:DiP-A, J1:OT, J1:OT-A, J5:CBN, J5:CBN-A, J5:DiP, J5:DiP-A, J5:OT, J5:OT-A, S1:DiP, S1:DiP-A, S1:OT, S1:OT-A, S5:DiP, S5:DiP-A, S5:OT, S5:OT-A |

Table 16: (continued)

|     | Conjunction | Drivers | Tree | S.Size | Model | sh  | S.Time | S.Type      | Best method(s)                                                                                                                                                             |
|-----|-------------|---------|------|--------|-------|-----|--------|-------------|----------------------------------------------------------------------------------------------------------------------------------------------------------------------------|
| 590 | No          | 9       | 9-B  | 1000   | exp   | 0   | last   | wholeT_0.01 | J1:DiP, J1:DiP-A, J1:OT, J1:OT-A, J5:DiP, J5:DiP-A, J5:OT, J5:OT-A, S1:OT-A, S5:DiP, S5:DiP-A, S5:OT, S5:OT-A                                                              |
| 591 | No          | 9       | 9-B  | 1000   | exp   | 0   | last   | wholeT_0.5  | J1:DiP, J1:DiP-A, J1:OT, J5:CBN, J5:CBN-A, J5:DiP, J5:DiP-A, J5:OT, J5:OT-A, S1:DiP, S1:DiP-A, S1:OT, S1:OT-A, S5:DiP, S5:OT, S5:OT-A                                      |
| 592 | No          | 9       | 9-B  | 1000   | exp   | 0   | unif   | singleC     | J1:CBN, J1:CBN-A, J1:DiP, J1:DiP-A, J1:OT, J1:OT-A, J5:CBN, J5:CBN-A, J5:DiP, J5:DiP-A, J5:OT, S1:DiP, S1:DiP-A, S1:OT, S1:OT-A, S5:DiP, S5:DiP-A, S5:OT, S5:OT-A          |
| 593 | No          | 9       | 9-B  | 1000   | exp   | 0   | unif   | wholeT_0.01 | J1:DiP, J1:DiP-A, J1:OT, J1:OT-A, J5:CBN, J5:CBN-A, J5:DiP, J5:DiP-A, J5:OT, J5:OT-A, S1:DiP, S1:DiP-A, S1:OT, S1:OT-A, S5:DiP, S5:DiP-A, S5:OT, S5:OT-A                   |
| 594 | No          | 9       | 9-B  | 1000   | exp   | 0   | unif   | wholeT_0.5  | J1:CBN, J1:CBN-A, J1:DiP, J1:DiP-A, J1:OT, J1:OT-A, J5:CBN, J5:CBN-A, J5:DiP, J5:DiP-A, J5:OT, J5:OT-A, S1:DiP, S1:DiP-A, S1:OT, S1:OT-A, S5:DiP, S5:DiP-A, S5:OT, S5:OT-A |
| 595 | No          | 9       | 9-B  | 1000   | exp   | Inf | last   | singleC     | J1:DiP, J1:DiP-A, J1:OT, J1:OT-A, J5:DiP, J5:DiP-A, J5:OT, J5:OT-A, S5:DiP, S5:DiP-A, S5:OT, S5:OT-A                                                                       |
| 596 | No          | 9       | 9-B  | 1000   | exp   | Inf | last   | wholeT_0.01 | J5:DiP, J5:DiP-A                                                                                                                                                           |
| 597 | No          | 9       | 9-B  | 1000   | exp   | Inf | last   | wholeT_0.5  | J1:DiP, J1:DiP-A, J1:OT, J1:OT-A, J5:DiP, J5:DiP-A, J5:OT, J5:OT-A, S1:DiP-A, S5:DiP, S5:DiP-A, S5:OT, S5:OT-A                                                             |
| 598 | No          | 9       | 9-B  | 1000   | exp   | Inf | unif   | singleC     | J1:DiP, J1:DiP-A, J1:OT, J1:OT-A, J5:CBN, J5:CBN-A, J5:DiP, J5:DiP-A, J5:OT, J5:OT-A, S1:DiP, S1:DiP-A, S1:OT, S5:DiP, S5:DiP-A, S5:OT, S5:OT-A                            |
| 599 | No          | 9       | 9-B  | 1000   | exp   | Inf | unif   | wholeT_0.01 | J5:DiP, J5:DiP-A, J5:OT, J5:OT-A, S5:DiP, S5:DiP-A, S5:OT, S5:OT-A                                                                                                         |

Table 16: (continued)

|     | Conjunction | Drivers | Tree | S.Size | Model | sh  | S.Time | S.Type      | Best method(s)                                                                                                                                           |
|-----|-------------|---------|------|--------|-------|-----|--------|-------------|----------------------------------------------------------------------------------------------------------------------------------------------------------|
| 600 | No          | 9       | 9-B  | 1000   | exp   | Inf | unif   | wholeT_0.5  | J1:DiP, J1:DiP-A, J1:OT, J1:OT-A, J5:CBN, J5:CBN-A, J5:DiP, J5:DiP-A, J5:OT, J5:OT-A, S1:DiP, S1:DiP-A, S1:OT, S1:OT-A, S5:DiP, S5:DiP-A, S5:OT, S5:OT-A |
| 601 | No          | 9       | 9-B  | 1000   | McF_4 | 0   | last   | singleC     | J1:DiP, J1:DiP-A, J1:OT, J1:OT-A, J5:CBN, J5:DiP, J5:DiP-A, J5:OT, J5:OT-A, S1:DiP-A, S1:OT, S1:OT-A, S5:DiP, S5:DiP-A, S5:OT, S5:OT-A                   |
| 602 | No          | 9       | 9-B  | 1000   | McF_4 | 0   | last   | wholeT_0.01 | J1:DiP, J1:DiP-A, J1:OT, J1:OT-A, J5:CBN, J5:DiP, J5:DiP-A, J5:OT, J5:OT-A, S1:DiP, S1:DiP-A, S5:DiP, S5:DiP-A, S5:OT, S5:OT-A                           |
| 603 | No          | 9       | 9-B  | 1000   | McF_4 | 0   | last   | wholeT_0.5  | J1:DiP, J1:DiP-A, J1:OT, J1:OT-A, J5:DiP, J5:DiP-A, J5:OT, J5:OT-A, S1:DiP, S1:OT, S1:OT-A, S5:DiP, S5:DiP-A, S5:OT, S5:OT-A                             |
| 604 | No          | 9       | 9-B  | 1000   | McF_4 | 0   | unif   | singleC     | J1:DiP, J1:DiP-A, J1:OT, J1:OT-A, J5:DiP, J5:DiP-A, J5:OT, J5:OT-A, S1:DiP, S1:DiP-A, S1:OT, S1:OT-A, S5:DiP, S5:DiP-A, S5:OT, S5:OT-A                   |
| 605 | No          | 9       | 9-B  | 1000   | McF_4 | 0   | unif   | wholeT_0.01 | J1:DiP, J1:DiP-A, J1:OT, J1:OT-A, J5:DiP, J5:DiP-A, J5:OT, J5:OT-A, S1:DiP-A, S5:DiP, S5:DiP-A, S5:OT, S5:OT-A                                           |
| 606 | No          | 9       | 9-B  | 1000   | McF_4 | 0   | unif   | wholeT_0.5  | J1:DiP, J1:DiP-A, J1:OT, J1:OT-A, J5:DiP, J5:DiP-A, J5:OT, J5:OT-A, S1:DiP, S1:DiP-A, S1:OT, S1:OT-A, S5:DiP, S5:DiP-A, S5:OT                            |
| 607 | No          | 9       | 9-B  | 1000   | McF_4 | Inf | last   | singleC     | J1:DiP, J1:DiP-A, J1:OT, J1:OT-A, J5:DiP, J5:DiP-A, J5:OT, J5:OT-A, S1:OT, S1:OT-A, S5:DiP, S5:DiP-A, S5:OT, S5:OT-A                                     |
| 608 | No          | 9       | 9-B  | 1000   | McF_4 | Inf | last   | wholeT_0.01 | J1:DiP, J1:DiP-A, J1:OT, J1:OT-A, J5:DiP, J5:DiP-A, J5:OT-A, S1:DiP, S1:DiP-A, S5:DiP, S5:DiP-A, S5:OT, S5:OT-A                                          |

Table 16: (continued)

|     | Conjunction | Drivers | Tree | S.Size | Model | sh  | S.Time | S.Type      | Best method(s)                                                                                                                                                                               |
|-----|-------------|---------|------|--------|-------|-----|--------|-------------|----------------------------------------------------------------------------------------------------------------------------------------------------------------------------------------------|
| 609 | No          | 9       | 9-B  | 1000   | McF_4 | Inf | last   | wholeT_0.5  | J1:DiP, J1:DiP-A, J1:OT, J1:OT-A, J5:DiP, J5:DiP-A, J5:OT-A, S1:DiP, S1:DiP-A, S1:OT, S1:OT-A, S5:DiP, S5:DiP-A, S5:OT, S5:OT-A                                                              |
| 610 | No          | 9       | 9-B  | 1000   | McF_4 | Inf | unif   | singleC     | J1:DiP, J1:DiP-A, J1:OT, J1:OT-A, J5:DiP, J5:DiP-A, J5:OT, J5:OT-A, S1:DiP, S1:DiP-A, S1:OT, S1:OT-A, S5:DiP, S5:DiP-A, S5:OT, S5:OT-A                                                       |
| 611 | No          | 9       | 9-B  | 1000   | McF_4 | Inf | unif   | wholeT_0.01 | J1:DiP, J1:DiP-A, J1:OT, J1:OT-A, J5:DiP, J5:DiP-A, J5:OT, J5:OT-A, S1:DiP-A, S5:DiP, S5:DiP-A, S5:OT, S5:OT-A                                                                               |
| 612 | No          | 9       | 9-B  | 1000   | McF_4 | Inf | unif   | wholeT_0.5  | J1:DiP, J1:DiP-A, J1:OT, J1:OT-A, J5:DiP, J5:DiP-A, J5:OT, J5:OT-A, S1:DiP, S1:DiP-A, S1:OT, S1:OT-A, S5:DiP, S5:DiP-A, S5:OT, S5:OT-A                                                       |
| 613 | No          | 9       | 9-B  | 1000   | McF_6 | 0   | last   | singleC     | J1:DiP, J1:OT, J5:DiP, J5:OT, S1:DiP, S5:DiP, S5:OT                                                                                                                                          |
| 614 | No          | 9       | 9-B  | 1000   | McF_6 | 0   | last   | wholeT_0.01 | J1:DiP, J1:OT, J5:DiP, J5:OT, S1:DiP, S5:DiP, S5:OT                                                                                                                                          |
| 615 | No          | 9       | 9-B  | 1000   | McF_6 | 0   | last   | wholeT_0.5  | J1:DiP, J1:OT, J5:DiP, J5:OT, S1:DiP, S1:OT, S5:DiP, S5:OT                                                                                                                                   |
| 616 | No          | 9       | 9-B  | 1000   | McF_6 | 0   | unif   | singleC     | J1:CBN, J1:CBN-A, J1:DiP, J1:DiP-A, J1:OT, J1:OT-A, J5:CBN, J5:CBN-A, J5:DiP, J5:DiP-A, J5:OT, J5:OT-A, S1:DiP, S1:DiP-A, S1:OT, S1:OT-A, S5:CBN, S5:CBN-A, S5:DiP, S5:DiP-A, S5:OT, S5:OT-A |
| 617 | No          | 9       | 9-B  | 1000   | McF_6 | 0   | unif   | wholeT_0.01 | J1:CBN, J1:CBN-A, J1:DiP, J1:DiP-A, J1:OT, J1:OT-A, J5:CBN, J5:CBN-A, J5:DiP, J5:DiP-A, J5:OT, J5:OT-A, S1:DiP-A, S5:DiP, S5:DiP-A, S5:OT, S5:OT-A                                           |
| 618 | No          | 9       | 9-B  | 1000   | McF_6 | 0   | unif   | wholeT_0.5  | J1:CBN, J1:CBN-A, J1:DiP, J1:DiP-A, J1:OT, J5:CBN-A, J5:DiP, J5:DiP-A, J5:OT, J5:OT-A, S1:DiP, S1:OT, S1:OT-A, S5:CBN-A, S5:DiP, S5:DiP-A, S5:OT, S5:OT-A                                    |
| 619 | No          | 9       | 9-B  | 1000   | McF_6 | Inf | last   | singleC     | J1:DiP, J1:OT, J5:DiP, J5:OT, S1:DiP, S5:DiP, S5:OT                                                                                                                                          |

Table 16: (continued)

|     | Conjunction | Drivers | Tree | S.Size | Model | sh  | S.Time | S.Type      | Best method(s)                                                                                                                                                     |
|-----|-------------|---------|------|--------|-------|-----|--------|-------------|--------------------------------------------------------------------------------------------------------------------------------------------------------------------|
| 620 | No          | 9       | 9-B  | 1000   | McF_6 | Inf | last   | wholeT_0.01 | J1:DiP, J1:OT, J5:DiP, J5:OT, S5:DiP, S5:OT                                                                                                                        |
| 621 | No          | 9       | 9-B  | 1000   | McF_6 | Inf | last   | wholeT_0.5  | J1:DiP, J1:OT, J5:DiP, J5:OT, S1:DiP, S1:OT, S5:DiP, S5:OT                                                                                                         |
| 622 | No          | 9       | 9-B  | 1000   | McF_6 | Inf | unif   | singleC     | J1:CBN, J1:CBN-A, J1:DiP, J1:DiP-A, J1:OT, J1:OT-A, J5:CBN-A, J5:DiP, J5:DiP-A, J5:OT, J5:OT-A, S1:DiP, S1:DiP-A, S1:OT, S1:OT-A, S5:DiP, S5:DiP-A, S5:OT, S5:OT-A |
| 623 | No          | 9       | 9-B  | 1000   | McF_6 | Inf | unif   | wholeT_0.01 | J1:CBN-A, J1:DiP-A, J1:OT, J1:OT-A, J5:CBN-A, J5:DiP, J5:DiP-A, J5:OT, J5:OT-A, S5:CBN, S5:DiP, S5:DiP-A, S5:OT, S5:OT-A                                           |
| 624 | No          | 9       | 9-B  | 1000   | McF_6 | Inf | unif   | wholeT_0.5  | J1:CBN, J1:CBN-A, J1:DiP, J1:DiP-A, J1:OT, J1:OT-A, J5:CBN-A, J5:DiP, J5:DiP-A, J5:OT, J5:OT-A, S1:DiP, S1:DiP-A, S1:OT, S1:OT-A, S5:DiP, S5:DiP-A, S5:OT, S5:OT-A |
| 625 | No          | 9       | 9-B  | 200    | Bozic | 0   | last   | singleC     | J1:DiP, J1:DiP-A, J1:OT, J1:OT-A, J5:DiP, J5:DiP-A, J5:OT, J5:OT-A, S1:DiP, S1:DiP-A, S5:DiP, S5:DiP-A, S5:OT, S5:OT-A                                             |
| 626 | No          | 9       | 9-B  | 200    | Bozic | 0   | last   | wholeT_0.01 | J1:DiP, J1:DiP-A, J1:OT, J1:OT-A, J5:CBN-A, J5:DiP, J5:DiP-A, J5:OT, J5:OT-A, S1:DiP, S5:DiP, S5:DiP-A, S5:OT, S5:OT-A                                             |
| 627 | No          | 9       | 9-B  | 200    | Bozic | 0   | last   | wholeT_0.5  | J1:DiP, J1:DiP-A, J1:OT, J1:OT-A, J5:DiP, J5:DiP-A, J5:OT, J5:OT-A, S1:DiP, S1:DiP-A, S5:DiP, S5:DiP-A, S5:OT, S5:OT-A                                             |
| 628 | No          | 9       | 9-B  | 200    | Bozic | 0   | unif   | singleC     | J1:DiP, J1:DiP-A, J1:OT, J1:OT-A, J5:CBN, J5:CBN-A, J5:DiP, J5:DiP-A, J5:OT, J5:OT-A, S1:DiP, S1:DiP-A, S1:OT, S5:DiP, S5:DiP-A, S5:OT, S5:OT-A                    |
| 629 | No          | 9       | 9-B  | 200    | Bozic | 0   | unif   | wholeT_0.01 | J1:DiP, J1:DiP-A, J1:OT, J1:OT-A, J5:DiP, J5:DiP-A, J5:OT, J5:OT-A, S5:DiP, S5:DiP-A, S5:OT, S5:OT-A                                                               |

Table 16: (continued)

|     | Conjunction | Drivers | Tree | S.Size | Model | sh  | S.Time | S.Type      | Best method(s)                                                                                                                                                   |
|-----|-------------|---------|------|--------|-------|-----|--------|-------------|------------------------------------------------------------------------------------------------------------------------------------------------------------------|
| 630 | No          | 9       | 9-B  | 200    | Bozic | 0   | unif   | wholeT_0.5  | J1:DiP, J1:DiP-A, J1:OT, J1:OT-A, J5:CBN, J5:CBN-A, J5:DiP, J5:DiP-A, J5:OT, J5:OT-A, S1:DiP, S1:DiP-A, S1:OT, S1:OT-A, S5:DiP, S5:DiP-A, S5:OT, S5:OT-A         |
| 631 | No          | 9       | 9-B  | 200    | Bozic | Inf | last   | singleC     | J1:DiP, J1:DiP-A, J5:DiP, J5:DiP-A, J5:OT, J5:OT-A, S1:DiP, S5:DiP, S5:DiP-A, S5:OT                                                                              |
| 632 | No          | 9       | 9-B  | 200    | Bozic | Inf | last   | wholeT_0.01 | J5:CBN-A, J5:DiP, J5:DiP-A, J5:OT, J5:OT-A                                                                                                                       |
| 633 | No          | 9       | 9-B  | 200    | Bozic | Inf | last   | wholeT_0.5  | J1:DiP, J1:DiP-A, J1:OT, J1:OT-A, J5:DiP, J5:DiP-A, J5:OT, J5:OT-A, S5:DiP, S5:DiP-A, S5:OT, S5:OT-A                                                             |
| 634 | No          | 9       | 9-B  | 200    | Bozic | Inf | unif   | singleC     | J1:DiP, J1:DiP-A, J1:OT, J1:OT-A, J5:DiP, J5:DiP-A, J5:OT, J5:OT-A, S5:DiP, S5:DiP-A, S5:OT, S5:OT-A                                                             |
| 635 | No          | 9       | 9-B  | 200    | Bozic | Inf | unif   | wholeT_0.01 | J5:DiP, J5:OT, J5:OT-A                                                                                                                                           |
| 636 | No          | 9       | 9-B  | 200    | Bozic | Inf | unif   | wholeT_0.5  | J1:DiP, J1:DiP-A, J1:OT, J1:OT-A, J5:CBN-A, J5:DiP, J5:DiP-A, J5:OT, J5:OT-A, S5:DiP, S5:DiP-A, S5:OT, S5:OT-A                                                   |
| 637 | No          | 9       | 9-B  | 200    | exp   | 0   | last   | singleC     | J1:DiP, J1:DiP-A, J1:OT, J1:OT-A, J5:CBN, J5:CBN-A, J5:DiP, J5:DiP-A, J5:OT, J5:OT-A, S1:DiP, S1:DiP-A, S1:OT, S1:OT-A, S5:DiP, S5:DiP-A, S5:OT, S5:OT-A         |
| 638 | No          | 9       | 9-B  | 200    | exp   | 0   | last   | wholeT_0.01 | J1:DiP, J1:DiP-A, J1:OT, J1:OT-A, J5:DiP, J5:DiP-A, J5:OT, J5:OT-A, S1:DiP, S1:DiP-A, S5:DiP, S5:DiP-A, S5:OT, S5:OT-A                                           |
| 639 | No          | 9       | 9-B  | 200    | exp   | 0   | last   | wholeT_0.5  | J1:DiP, J1:DiP-A, J1:OT, J1:OT-A, J5:CBN, J5:CBN-A, J5:DiP, J5:DiP-A, J5:OT, J5:OT-A, S1:DiP, S1:DiP-A, S1:OT, S1:OT-A, S5:DiP, S5:DiP-A, S5:OT, S5:OT-A         |
| 640 | No          | 9       | 9-B  | 200    | exp   | 0   | unif   | singleC     | J1:CBN, J1:CBN-A, J1:DiP, J1:OT, J1:OT-A, J5:CBN, J5:CBN-A, J5:DiP, J5:DiP-A, J5:OT, J5:OT-A, S1:DiP, S1:DiP-A, S1:OT, S1:OT-A, S5:DiP, S5:DiP-A, S5:OT, S5:OT-A |



Table 16: (continued)

|     | Conjunction | Drivers | Tree | S.Size | Model | sh  | S.Time | S.Type      | Best method(s)                                                                                                                                                             |
|-----|-------------|---------|------|--------|-------|-----|--------|-------------|----------------------------------------------------------------------------------------------------------------------------------------------------------------------------|
| 641 | No          | 9       | 9-B  | 200    | exp   | 0   | unif   | wholeT_0.01 | J1:DiP, J1:DiP-A, J1:OT, J1:OT-A, J5:CBN, J5:CBN-A, J5:DiP, J5:DiP-A, J5:OT, J5:OT-A, S1:DiP, S1:DiP-A, S1:OT-A, S5:DiP, S5:DiP-A, S5:OT, S5:OT-A                          |
| 642 | No          | 9       | 9-B  | 200    | exp   | 0   | unif   | wholeT_0.5  | J1:CBN, J1:CBN-A, J1:DiP, J1:DiP-A, J1:OT, J1:OT-A, J5:CBN, J5:CBN-A, J5:DiP, J5:DiP-A, J5:OT, J5:OT-A, S1:DiP, S1:DiP-A, S1:OT, S1:OT-A, S5:DiP, S5:DiP-A, S5:OT, S5:OT-A |
| 643 | No          | 9       | 9-B  | 200    | exp   | Inf | last   | singleC     | J1:DiP, J1:DiP-A, J1:OT, J1:OT-A, J5:DiP, J5:DiP-A, J5:OT, J5:OT-A, S1:DiP, S1:DiP-A, S5:DiP, S5:DiP-A, S5:OT, S5:OT-A                                                     |
| 644 | No          | 9       | 9-B  | 200    | exp   | Inf | last   | wholeT_0.01 | J5:CBN-A, J5:DiP, J5:DiP-A, J5:OT, J5:OT-A                                                                                                                                 |
| 645 | No          | 9       | 9-B  | 200    | exp   | Inf | last   | wholeT_0.5  | J1:DiP, J1:DiP-A, J1:OT, J1:OT-A, J5:DiP, J5:DiP-A, J5:OT, J5:OT-A, S1:DiP, S1:DiP-A, S5:DiP, S5:DiP-A, S5:OT, S5:OT-A                                                     |
| 646 | No          | 9       | 9-B  | 200    | exp   | Inf | unif   | singleC     | J1:DiP, J1:DiP-A, J1:OT, J1:OT-A, J5:CBN, J5:OT-A, S1:DiP-A, S5:DiP, S5:DiP-A, S5:OT, S5:OT-A                                                                              |
| 647 | No          | 9       | 9-B  | 200    | exp   | Inf | unif   | wholeT_0.01 | J5:DiP, J5:DiP-A, J5:OT, J5:OT-A, S5:DiP, S5:OT, S5:OT-A                                                                                                                   |
| 648 | No          | 9       | 9-B  | 200    | exp   | Inf | unif   | wholeT_0.5  | J1:DiP, J1:DiP-A, J1:OT, J1:OT-A, J5:CBN-A, J5:DiP, J5:DiP-A, J5:OT, J5:OT-A, S1:DiP, S1:DiP-A, S5:DiP, S5:DiP-A, S5:OT, S5:OT-A                                           |
| 649 | No          | 9       | 9-B  | 200    | McF_4 | 0   | last   | singleC     | J1:DiP, J1:DiP-A, J1:OT, J1:OT-A, J5:DiP, J5:DiP-A, J5:OT, J5:OT-A, S5:DiP, S5:DiP-A, S5:OT, S5:OT-A                                                                       |
| 650 | No          | 9       | 9-B  | 200    | McF_4 | 0   | last   | wholeT_0.01 | J1:DiP, J1:DiP-A, J1:OT, J1:OT-A, J5:DiP, J5:DiP-A, J5:OT, J5:OT-A, S1:DiP, S1:DiP-A, S5:DiP, S5:DiP-A, S5:OT, S5:OT-A                                                     |
| 651 | No          | 9       | 9-B  | 200    | McF_4 | 0   | last   | wholeT_0.5  | J1:DiP, J1:DiP-A, J1:OT, J1:OT-A, J5:DiP, J5:DiP-A, J5:OT, J5:OT-A, S1:DiP-A, S5:DiP, S5:DiP-A, S5:OT, S5:OT-A                                                             |

Table 16: (continued)

|     | Conjunction | Drivers | Tree | S.Size | Model | sh  | S.Time | S.Type      | Best method(s)                                                                                                         |
|-----|-------------|---------|------|--------|-------|-----|--------|-------------|------------------------------------------------------------------------------------------------------------------------|
| 652 | No          | 9       | 9-B  | 200    | McF_4 | 0   | unif   | singleC     | J1:DiP, J1:DiP-A, J1:OT, J1:OT-A, J5:DiP, J5:DiP-A, J5:OT, J5:OT-A, S1:DiP, S1:DiP-A, S5:DiP, S5:DiP-A, S5:OT, S5:OT-A |
| 653 | No          | 9       | 9-B  | 200    | McF_4 | 0   | unif   | wholeT_0.01 | J1:DiP, J1:DiP-A, J1:OT, J1:OT-A, J5:DiP, J5:DiP-A, J5:OT, J5:OT-A, S1:DiP, S1:DiP-A, S5:DiP, S5:DiP-A, S5:OT, S5:OT-A |
| 654 | No          | 9       | 9-B  | 200    | McF_4 | 0   | unif   | wholeT_0.5  | J1:DiP, J1:DiP-A, J1:OT, J1:OT-A, J5:DiP, J5:DiP-A, J5:OT, J5:OT-A, S1:DiP, S1:DiP-A, S5:DiP, S5:DiP-A, S5:OT, S5:OT-A |
| 655 | No          | 9       | 9-B  | 200    | McF_4 | Inf | last   | singleC     | J1:DiP, J1:DiP-A, J1:OT, J1:OT-A, J5:DiP, J5:DiP-A, J5:OT, J5:OT-A, S5:DiP, S5:DiP-A, S5:OT, S5:OT-A                   |
| 656 | No          | 9       | 9-B  | 200    | McF_4 | Inf | last   | wholeT_0.01 | J1:DiP, J1:DiP-A, J1:OT, J1:OT-A, J5:DiP, J5:DiP-A, J5:OT, J5:OT-A, S5:DiP, S5:DiP-A, S5:OT, S5:OT-A                   |
| 657 | No          | 9       | 9-B  | 200    | McF_4 | Inf | last   | wholeT_0.5  | J1:DiP, J1:DiP-A, J1:OT, J1:OT-A, J5:DiP, J5:DiP-A, J5:OT, J5:OT-A, S1:DiP, S1:DiP-A, S5:DiP, S5:DiP-A, S5:OT, S5:OT-A |
| 658 | No          | 9       | 9-B  | 200    | McF_4 | Inf | unif   | singleC     | J1:DiP, J1:DiP-A, J1:OT, J1:OT-A, J5:DiP, J5:DiP-A, J5:OT, J5:OT-A, S1:DiP, S1:DiP-A, S5:DiP, S5:DiP-A, S5:OT, S5:OT-A |
| 659 | No          | 9       | 9-B  | 200    | McF_4 | Inf | unif   | wholeT_0.01 | J1:DiP, J1:DiP-A, J1:OT, J1:OT-A, J5:DiP, J5:DiP-A, J5:OT, J5:OT-A, S5:DiP, S5:DiP-A, S5:OT                            |
| 660 | No          | 9       | 9-B  | 200    | McF_4 | Inf | unif   | wholeT_0.5  | J1:DiP, J1:DiP-A, J1:OT, J1:OT-A, J5:DiP, J5:DiP-A, J5:OT, J5:OT-A, S1:DiP, S1:DiP-A, S5:DiP, S5:DiP-A, S5:OT, S5:OT-A |
| 661 | No          | 9       | 9-B  | 200    | McF_6 | 0   | last   | singleC     | J1:DiP, J1:OT, J5:DiP, J5:OT, S1:DiP, S5:DiP, S5:OT                                                                    |
| 662 | No          | 9       | 9-B  | 200    | McF_6 | 0   | last   | wholeT_0.01 | J1:DiP, J1:OT, J5:DiP, J5:OT, S1:DiP, S5:DiP, S5:OT                                                                    |
| 663 | No          | 9       | 9-B  | 200    | McF_6 | 0   | last   | wholeT_0.5  | J1:DiP, J1:OT, J5:DiP, J5:OT, S1:DiP, S5:DiP, S5:OT                                                                    |

Table 16: (continued)

|     | Conjunction | Drivers | Tree | S.Size | Model | sh  | S.Time | S.Type      | Best method(s)                                                                                                                                             |
|-----|-------------|---------|------|--------|-------|-----|--------|-------------|------------------------------------------------------------------------------------------------------------------------------------------------------------|
| 664 | No          | 9       | 9-B  | 200    | McF_6 | 0   | unif   | singleC     | J1:CBN, J1:CBN-A, J1:DiP-A, J1:OT, J1:OT-A, J5:CBN, J5:CBN-A, J5:DiP, J5:DiP-A, J5:OT, J5:OT-A, S1:DiP, S1:DiP-A, S5:CBN, S5:DiP, S5:DiP-A, S5:OT, S5:OT-A |
| 665 | No          | 9       | 9-B  | 200    | McF_6 | 0   | unif   | wholeT_0.01 | J1:CBN-A, J1:DiP, J1:DiP-A, J1:OT, J1:OT-A, J5:CBN, J5:CBN-A, J5:DiP, J5:DiP-A, J5:OT, J5:OT-A, S1:DiP-A, S5:DiP, S5:DiP-A, S5:OT, S5:OT-A                 |
| 666 | No          | 9       | 9-B  | 200    | McF_6 | 0   | unif   | wholeT_0.5  | J1:CBN-A, J1:DiP, J1:DiP-A, J1:OT, J1:OT-A, J5:CBN, J5:CBN-A, J5:DiP, J5:DiP-A, J5:OT, J5:OT-A, S5:CBN-A, S5:DiP, S5:DiP-A, S5:OT, S5:OT-A                 |
| 667 | No          | 9       | 9-B  | 200    | McF_6 | Inf | last   | singleC     | J1:DiP, J1:OT, J5:DiP, J5:OT, S1:DiP, S5:DiP, S5:OT                                                                                                        |
| 668 | No          | 9       | 9-B  | 200    | McF_6 | Inf | last   | wholeT_0.01 | J1:DiP, J1:OT, J5:DiP, J5:OT, S1:DiP, S5:DiP, S5:OT                                                                                                        |
| 669 | No          | 9       | 9-B  | 200    | McF_6 | Inf | last   | wholeT_0.5  | J1:DiP, J1:OT, J5:DiP, J5:OT, S1:DiP, S5:DiP, S5:OT                                                                                                        |
| 670 | No          | 9       | 9-B  | 200    | McF_6 | Inf | unif   | singleC     | J1:CBN, J1:CBN-A, J1:DiP, J1:DiP-A, J1:OT, J1:OT-A, J5:CBN-A, J5:DiP, J5:DiP-A, J5:OT, J5:OT-A, S1:DiP, S1:DiP-A, S5:CBN, S5:DiP, S5:DiP-A, S5:OT, S5:OT-A |
| 671 | No          | 9       | 9-B  | 200    | McF_6 | Inf | unif   | wholeT_0.01 | J1:CBN, J1:CBN-A, J1:DiP, J1:OT, J1:OT-A, J5:DiP, J5:OT, J5:OT-A, S5:OT, S5:OT-A                                                                           |
| 672 | No          | 9       | 9-B  | 200    | McF_6 | Inf | unif   | wholeT_0.5  | J1:CBN, J1:CBN-A, J1:DiP, J1:DiP-A, J1:OT, J1:OT-A, J5:CBN-A, J5:DiP, J5:DiP-A, J5:OT, J5:OT-A, S5:CBN, S5:CBN-A, S5:DiP, S5:DiP-A, S5:OT, S5:OT-A         |
| 673 | No          | 9       | 9-B  | 100    | Bozic | 0   | last   | singleC     | J1:DiP, J1:DiP-A, J1:OT, J1:OT-A, J5:DiP, J5:DiP-A, J5:OT, J5:OT-A, S1:DiP, S1:DiP-A, S5:DiP, S5:DiP-A, S5:OT, S5:OT-A                                     |
| 674 | No          | 9       | 9-B  | 100    | Bozic | 0   | last   | wholeT_0.01 | J1:DiP, J1:DiP-A, J1:OT, J5:DiP, J5:DiP-A, J5:OT, J5:OT-A, S1:DiP, S1:DiP-A, S5:DiP, S5:DiP-A, S5:OT, S5:OT-A                                              |

Table 16: (continued)

|     | Conjunction | Drivers | Tree | S.Size | Model | sh  | S.Time | S.Type      | Best method(s)                                                                                                                                  |
|-----|-------------|---------|------|--------|-------|-----|--------|-------------|-------------------------------------------------------------------------------------------------------------------------------------------------|
| 675 | No          | 9       | 9-B  | 100    | Bozic | 0   | last   | wholeT_0.5  | J1:DiP, J1:DiP-A, J1:OT, J1:OT-A, J5:DiP, J5:DiP-A, J5:OT, J5:OT-A, S1:DiP, S1:DiP-A, S5:DiP, S5:OT, S5:OT-A                                    |
| 676 | No          | 9       | 9-B  | 100    | Bozic | 0   | unif   | singleC     | J1:DiP, J1:DiP-A, J1:OT, J1:OT-A, J5:CBN, J5:CBN-A, J5:DiP, J5:DiP-A, J5:OT, J5:OT-A, S1:DiP, S1:DiP-A, S5:DiP, S5:DiP-A, S5:OT, S5:OT-A        |
| 677 | No          | 9       | 9-B  | 100    | Bozic | 0   | unif   | wholeT_0.01 | J1:DiP, J1:DiP-A, J5:DiP, J5:DiP-A, J5:OT, J5:OT-A, S1:DiP, S1:DiP-A, S5:DiP, S5:DiP-A, S5:OT, S5:OT-A                                          |
| 678 | No          | 9       | 9-B  | 100    | Bozic | 0   | unif   | wholeT_0.5  | J1:DiP, J1:DiP-A, J5:CBN, J5:CBN-A, J5:DiP, J5:DiP-A, J5:OT, J5:OT-A, S1:DiP, S1:DiP-A, S5:DiP, S5:DiP-A, S5:OT, S5:OT-A                        |
| 679 | No          | 9       | 9-B  | 100    | Bozic | Inf | last   | singleC     | J1:DiP, J1:DiP-A, J5:DiP, J5:DiP-A, J5:OT, J5:OT-A, S1:DiP-A, S5:DiP, S5:DiP-A                                                                  |
| 680 | No          | 9       | 9-B  | 100    | Bozic | Inf | last   | wholeT_0.01 | J5:DiP, J5:DiP-A                                                                                                                                |
| 681 | No          | 9       | 9-B  | 100    | Bozic | Inf | last   | wholeT_0.5  | J1:DiP, J1:DiP-A, J5:DiP, J5:DiP-A, J5:OT, J5:OT-A, S1:DiP, S1:DiP-A, S5:DiP, S5:DiP-A                                                          |
| 682 | No          | 9       | 9-B  | 100    | Bozic | Inf | unif   | singleC     | J1:DiP, J1:DiP-A, J5:DiP, J5:DiP-A, J5:OT, J5:OT-A, S5:DiP, S5:DiP-A, S5:OT, S5:OT-A                                                            |
| 683 | No          | 9       | 9-B  | 100    | Bozic | Inf | unif   | wholeT_0.01 | J5:DiP, J5:OT, J5:OT-A                                                                                                                          |
| 684 | No          | 9       | 9-B  | 100    | Bozic | Inf | unif   | wholeT_0.5  | J1:DiP, J1:DiP-A, J5:DiP, J5:DiP-A, J5:OT, J5:OT-A, S5:DiP, S5:DiP-A, S5:OT, S5:OT-A                                                            |
| 685 | No          | 9       | 9-B  | 100    | exp   | 0   | last   | singleC     | J1:DiP, J1:DiP-A, J1:OT, J1:OT-A, J5:CBN, J5:CBN-A, J5:DiP, J5:DiP-A, J5:OT, J5:OT-A, S1:DiP, S1:DiP-A, S1:OT, S1:OT-A, S5:DiP, S5:DiP-A, S5:OT |
| 686 | No          | 9       | 9-B  | 100    | exp   | 0   | last   | wholeT_0.01 | J1:DiP, J1:DiP-A, J1:OT, J1:OT-A, J5:DiP, J5:DiP-A, J5:OT, J5:OT-A, S1:DiP, S1:DiP-A, S5:DiP, S5:DiP-A, S5:OT, S5:OT-A                          |

Table 16: (continued)

|     | Conjunction | Drivers | Tree | S.Size | Model | sh  | S.Time | S.Type      | Best method(s)                                                                                                                                           |
|-----|-------------|---------|------|--------|-------|-----|--------|-------------|----------------------------------------------------------------------------------------------------------------------------------------------------------|
| 687 | No          | 9       | 9-B  | 100    | exp   | 0   | last   | wholeT_0.5  | J1:DiP, J1:DiP-A, J1:OT, J1:OT-A, J5:CBN, J5:CBN-A, J5:DiP, J5:DiP-A, J5:OT, J5:OT-A, S1:DiP, S1:DiP-A, S1:OT-A, S5:DiP, S5:DiP-A, S5:OT                 |
| 688 | No          | 9       | 9-B  | 100    | exp   | 0   | unif   | singleC     | J1:DiP, J1:DiP-A, J1:OT, J1:OT-A, J5:CBN, J5:CBN-A, J5:DiP, J5:DiP-A, J5:OT, J5:OT-A, S1:DiP, S1:DiP-A, S1:OT, S1:OT-A, S5:DiP, S5:DiP-A, S5:OT, S5:OT-A |
| 689 | No          | 9       | 9-B  | 100    | exp   | 0   | unif   | wholeT_0.01 | J1:DiP, J1:DiP-A, J1:OT, J1:OT-A, J5:CBN, J5:DiP, J5:DiP-A, J5:OT, J5:OT-A, S1:DiP, S1:DiP-A, S5:DiP, S5:DiP-A, S5:OT, S5:OT-A                           |
| 690 | No          | 9       | 9-B  | 100    | exp   | 0   | unif   | wholeT_0.5  | J1:DiP, J1:DiP-A, J1:OT, J1:OT-A, J5:CBN, J5:CBN-A, J5:DiP-A, J5:OT, J5:OT-A, S1:DiP, S1:DiP-A, S1:OT, S1:OT-A, S5:DiP, S5:DiP-A, S5:OT, S5:OT-A         |
| 691 | No          | 9       | 9-B  | 100    | exp   | Inf | last   | singleC     | J1:DiP, J1:DiP-A, J5:DiP, J5:DiP-A, J5:OT-A, S1:DiP, S1:DiP-A, S5:DiP, S5:DiP-A, S5:OT, S5:OT-A                                                          |
| 692 | No          | 9       | 9-B  | 100    | exp   | Inf | last   | wholeT_0.01 | J5:DiP, J5:DiP-A, J5:OT, J5:OT-A                                                                                                                         |
| 693 | No          | 9       | 9-B  | 100    | exp   | Inf | last   | wholeT_0.5  | J1:DiP, J1:DiP-A, J5:DiP, J5:OT, J5:OT-A, S1:DiP-A, S5:DiP, S5:DiP-A, S5:OT, S5:OT-A                                                                     |
| 694 | No          | 9       | 9-B  | 100    | exp   | Inf | unif   | singleC     | J1:DiP, J1:DiP-A, J5:CBN, J5:CBN-A, J5:DiP, J5:DiP-A, J5:OT, J5:OT-A, S1:DiP, S1:DiP-A, S5:DiP, S5:DiP-A, S5:OT, S5:OT-A                                 |
| 695 | No          | 9       | 9-B  | 100    | exp   | Inf | unif   | wholeT_0.01 | J5:DiP, J5:DiP-A, J5:OT, J5:OT-A, S5:OT, S5:OT-A                                                                                                         |
| 696 | No          | 9       | 9-B  | 100    | exp   | Inf | unif   | wholeT_0.5  | J1:DiP, J1:DiP-A, J1:OT, J5:CBN, J5:DiP, J5:DiP-A, J5:OT, J5:OT-A, S1:DiP, S1:DiP-A, S5:DiP, S5:DiP-A, S5:OT, S5:OT-A                                    |
| 697 | No          | 9       | 9-B  | 100    | McF_4 | 0   | last   | singleC     | J1:DiP, J1:OT-A, J5:DiP, J5:DiP-A, J5:OT, J5:OT-A, S1:DiP, S1:DiP-A, S5:DiP, S5:DiP-A, S5:OT                                                             |

Table 16: (continued)

|     | Conjunction | Drivers | Tree | S.Size | Model | sh  | S.Time | S.Type      | Best method(s)                                                                                                         |
|-----|-------------|---------|------|--------|-------|-----|--------|-------------|------------------------------------------------------------------------------------------------------------------------|
| 698 | No          | 9       | 9-B  | 100    | McF_4 | 0   | last   | wholeT_0.01 | J1:DiP-A, J5:DiP, J5:DiP-A, J5:OT, J5:OT-A, S1:DiP, S1:DiP-A, S5:DiP, S5:DiP-A, S5:OT, S5:OT-A                         |
| 699 | No          | 9       | 9-B  | 100    | McF_4 | 0   | last   | wholeT_0.5  | J1:DiP, J1:DiP-A, J1:OT, J1:OT-A, J5:DiP, J5:DiP-A, J5:OT, J5:OT-A, S1:DiP, S1:DiP-A, S5:DiP, S5:DiP-A, S5:OT, S5:OT-A |
| 700 | No          | 9       | 9-B  | 100    | McF_4 | 0   | unif   | singleC     | J1:DiP, J1:DiP-A, J1:OT-A, J5:DiP, J5:DiP-A, J5:OT, J5:OT-A, S1:DiP, S1:DiP-A, S5:DiP, S5:DiP-A, S5:OT, S5:OT-A        |
| 701 | No          | 9       | 9-B  | 100    | McF_4 | 0   | unif   | wholeT_0.01 | J1:DiP, J1:DiP-A, J5:DiP, J5:DiP-A, J5:OT, J5:OT-A, S1:DiP, S1:DiP-A, S5:DiP, S5:DiP-A, S5:OT, S5:OT-A                 |
| 702 | No          | 9       | 9-B  | 100    | McF_4 | 0   | unif   | wholeT_0.5  | J1:DiP, J1:DiP-A, J1:OT, J1:OT-A, J5:DiP, J5:DiP-A, J5:OT, J5:OT-A, S1:DiP, S5:DiP, S5:DiP-A, S5:OT, S5:OT-A           |
| 703 | No          | 9       | 9-B  | 100    | McF_4 | Inf | last   | singleC     | J1:DiP, J1:DiP-A, J1:OT, J1:OT-A, J5:DiP, J5:DiP-A, J5:OT, J5:OT-A, S1:DiP, S1:DiP-A, S5:DiP, S5:DiP-A, S5:OT, S5:OT-A |
| 704 | No          | 9       | 9-B  | 100    | McF_4 | Inf | last   | wholeT_0.01 | J5:DiP, J5:DiP-A, J5:OT, S1:DiP, S5:DiP, S5:DiP-A, S5:OT, S5:OT-A                                                      |
| 705 | No          | 9       | 9-B  | 100    | McF_4 | Inf | last   | wholeT_0.5  | J1:DiP, J1:DiP-A, J5:DiP, J5:DiP-A, J5:OT, J5:OT-A, S1:DiP, S1:DiP-A, S5:DiP, S5:DiP-A, S5:OT, S5:OT-A                 |
| 706 | No          | 9       | 9-B  | 100    | McF_4 | Inf | unif   | singleC     | J1:DiP, J1:DiP-A, J1:OT, J1:OT-A, J5:DiP, J5:DiP-A, J5:OT, J5:OT-A, S1:DiP, S1:DiP-A, S5:DiP, S5:OT, S5:OT-A           |
| 707 | No          | 9       | 9-B  | 100    | McF_4 | Inf | unif   | wholeT_0.01 | J1:DiP, J1:DiP-A, J5:DiP, J5:DiP-A, J5:OT, J5:OT-A, S5:DiP, S5:DiP-A, S5:OT, S5:OT-A                                   |
| 708 | No          | 9       | 9-B  | 100    | McF_4 | Inf | unif   | wholeT_0.5  | J1:DiP, J1:DiP-A, J1:OT, J1:OT-A, J5:DiP, J5:DiP-A, J5:OT, J5:OT-A, S1:DiP, S1:DiP-A, S5:DiP, S5:DiP-A, S5:OT, S5:OT-A |

Table 16: (continued)

|     | Conjunction | Drivers | Tree | S.Size | Model | sh  | S.Time | S.Type      | Best method(s)                                                                                                                                               |
|-----|-------------|---------|------|--------|-------|-----|--------|-------------|--------------------------------------------------------------------------------------------------------------------------------------------------------------|
| 709 | No          | 9       | 9-B  | 100    | McF_6 | 0   | last   | singleC     | J1:DiP, J1:DiP-A, J1:OT, J5:DiP, J5:DiP-A, J5:OT, S1:DiP, S1:DiP-A, S5:DiP, S5:DiP-A, S5:OT                                                                  |
| 710 | No          | 9       | 9-B  | 100    | McF_6 | 0   | last   | wholeT_0.01 | J5:DiP, J5:OT, S1:DiP, S5:DiP, S5:OT                                                                                                                         |
| 711 | No          | 9       | 9-B  | 100    | McF_6 | 0   | last   | wholeT_0.5  | J1:DiP, J1:OT, J5:DiP, J5:DiP-A, J5:OT, S1:DiP, S1:DiP-A, S5:DiP, S5:DiP-A, S5:OT                                                                            |
| 712 | No          | 9       | 9-B  | 100    | McF_6 | 0   | unif   | singleC     | J1:CBN, J1:CBN-A, J1:DiP, J1:DiP-A, J1:OT, J1:OT-A, J5:CBN-A, J5:DiP, J5:DiP-A, J5:OT, J5:OT-A, S1:DiP, S1:DiP-A, S5:CBN-A, S5:DiP, S5:DiP-A, S5:OT, S5:OT-A |
| 713 | No          | 9       | 9-B  | 100    | McF_6 | 0   | unif   | wholeT_0.01 | J1:CBN, J1:DiP, J1:DiP-A, J5:CBN-A, J5:DiP, J5:DiP-A, J5:OT, J5:OT-A, S1:DiP, S5:DiP, S5:DiP-A, S5:OT, S5:OT-A                                               |
| 714 | No          | 9       | 9-B  | 100    | McF_6 | 0   | unif   | wholeT_0.5  | J1:CBN, J1:CBN-A, J1:DiP, J1:DiP-A, J1:OT, J1:OT-A, J5:CBN-A, J5:DiP, J5:DiP-A, J5:OT, J5:OT-A, S1:DiP, S5:CBN, S5:CBN-A, S5:DiP, S5:OT, S5:OT-A             |
| 715 | No          | 9       | 9-B  | 100    | McF_6 | Inf | last   | singleC     | J1:DiP, J1:DiP-A, J1:OT, J5:DiP, J5:DiP-A, J5:OT, S1:DiP, S1:DiP-A, S5:DiP, S5:DiP-A, S5:OT                                                                  |
| 716 | No          | 9       | 9-B  | 100    | McF_6 | Inf | last   | wholeT_0.01 | J1:DiP, J5:DiP, J5:OT, S1:DiP, S5:DiP, S5:OT                                                                                                                 |
| 717 | No          | 9       | 9-B  | 100    | McF_6 | Inf | last   | wholeT_0.5  | J1:DiP, J1:DiP-A, J1:OT, J5:DiP, J5:DiP-A, J5:OT, S1:DiP, S5:DiP, S5:DiP-A, S5:OT                                                                            |
| 718 | No          | 9       | 9-B  | 100    | McF_6 | Inf | unif   | singleC     | J1:CBN, J1:CBN-A, J1:DiP, J1:OT, J1:OT-A, J5:CBN-A, J5:DiP, J5:DiP-A, J5:OT, J5:OT-A, S1:DiP, S1:DiP-A, S5:CBN-A, S5:DiP, S5:DiP-A, S5:OT, S5:OT-A           |
| 719 | No          | 9       | 9-B  | 100    | McF_6 | Inf | unif   | wholeT_0.01 | J1:DiP, J5:CBN-A, J5:DiP, J5:DiP-A, J5:OT, J5:OT-A, S1:DiP, S5:CBN-A, S5:DiP, S5:OT, S5:OT-A                                                                 |

Table 16: (continued)

|     | Conjunction | Drivers | Tree | S.Size | Model | sh  | S.Time | S.Type      | Best method(s)                                                                                                                                                                                         |
|-----|-------------|---------|------|--------|-------|-----|--------|-------------|--------------------------------------------------------------------------------------------------------------------------------------------------------------------------------------------------------|
| 720 | No          | 9       | 9-B  | 100    | McF_6 | Inf | unif   | wholeT_0.5  | J1:CBN, J1:CBN-A, J1:DiP, J1:DiP-A, J1:OT, J1:OT-A, J5:CBN-A, J5:DiP, J5:DiP-A, J5:OT, J5:OT-A, S5:CBN, S5:CBN-A, S5:OT, S5:OT-A                                                                       |
| 721 | No          | 7       | 7-B  | 1000   | Bozic | 0   | last   | singleC     | J1:CBN, J1:CBN-A, J1:DiP, J1:DiP-A, J1:OT, J5:CBN, J5:CBN-A, J5:DiP, J5:DiP-A, J5:OT, J5:OT-A, S1:DiP, S1:DiP-A, S1:OT, S1:OT-A, S5:CBN, S5:DiP, S5:DiP-A, S5:OT, S5:OT-A                              |
| 722 | No          | 7       | 7-B  | 1000   | Bozic | 0   | last   | wholeT_0.01 | J1:CBN, J1:CBN-A, J1:DiP, J1:DiP-A, J1:OT, J1:OT-A, J5:CBN, J5:CBN-A, J5:DiP, J5:DiP-A, J5:OT, J5:OT-A, S1:CBN, S1:CBN-A, S1:DiP-A, S1:OT, S1:OT-A, S5:CBN, S5:CBN-A, S5:DiP, S5:DiP-A, S5:OT, S5:OT-A |
| 723 | No          | 7       | 7-B  | 1000   | Bozic | 0   | last   | wholeT_0.5  | J1:CBN, J1:CBN-A, J1:DiP, J1:DiP-A, J1:OT, J1:OT-A, J5:CBN, J5:CBN-A, J5:DiP-A, J5:OT, J5:OT-A, S1:DiP, S1:DiP-A, S1:OT, S1:OT-A, S5:CBN, S5:DiP, S5:DiP-A, S5:OT, S5:OT-A                             |
| 724 | No          | 7       | 7-B  | 1000   | Bozic | 0   | unif   | singleC     | J1:CBN, J1:CBN-A, J1:DiP, J1:DiP-A, J1:OT, J1:OT-A, J5:CBN, J5:CBN-A, J5:DiP, J5:DiP-A, J5:OT, J5:OT-A, S1:CBN-A, S1:DiP, S1:DiP-A, S1:OT-A, S5:CBN, S5:CBN-A, S5:DiP, S5:DiP-A, S5:OT, S5:OT-A        |
| 725 | No          | 7       | 7-B  | 1000   | Bozic | 0   | unif   | wholeT_0.01 | J5:CBN, J5:CBN-A, J5:DiP, J5:DiP-A, J5:OT, J5:OT-A                                                                                                                                                     |
| 726 | No          | 7       | 7-B  | 1000   | Bozic | 0   | unif   | wholeT_0.5  | J1:CBN-A, J1:DiP, J1:DiP-A, J1:OT, J1:OT-A, J5:CBN, J5:CBN-A, J5:DiP, J5:DiP-A, J5:OT, S1:CBN, S1:CBN-A, S1:DiP, S1:DiP-A, S1:OT, S1:OT-A, S5:CBN, S5:CBN-A, S5:DiP, S5:DiP-A, S5:OT, S5:OT-A          |
| 727 | No          | 7       | 7-B  | 1000   | Bozic | Inf | last   | singleC     | J1:DiP, J1:DiP-A, J1:OT, J1:OT-A, J5:DiP, J5:DiP-A, J5:OT, J5:OT-A, S5:DiP, S5:DiP-A, S5:OT, S5:OT-A                                                                                                   |
| 728 | No          | 7       | 7-B  | 1000   | Bozic | Inf | last   | wholeT_0.01 | J5:CBN, J5:CBN-A, J5:DiP, J5:DiP-A, J5:OT, J5:OT-A                                                                                                                                                     |



Table 16: (continued)

|     | Conjunction | Drivers | Tree | S.Size | Model | sh  | S.Time | S.Type      | Best method(s)                                                                                                                                                                                          |
|-----|-------------|---------|------|--------|-------|-----|--------|-------------|---------------------------------------------------------------------------------------------------------------------------------------------------------------------------------------------------------|
| 729 | No          | 7       | 7-B  | 1000   | Bozic | Inf | last   | wholeT_0.5  | J1:DiP, J1:DiP-A, J1:OT, J1:OT-A, J5:DiP, J5:DiP-A, J5:OT-A, S5:DiP, S5:DiP-A, S5:OT, S5:OT-A                                                                                                           |
| 730 | No          | 7       | 7-B  | 1000   | Bozic | Inf | unif   | singleC     | J1:CBN, J1:CBN-A, J5:CBN, J5:CBN-A, J5:DiP, J5:DiP-A, J5:OT, J5:OT-A, S1:CBN, S1:CBN-A, S5:CBN, S5:CBN-A                                                                                                |
| 731 | No          | 7       | 7-B  | 1000   | Bozic | Inf | unif   | wholeT_0.01 | J5:CBN, J5:CBN-A, S5:CBN, S5:CBN-A                                                                                                                                                                      |
| 732 | No          | 7       | 7-B  | 1000   | Bozic | Inf | unif   | wholeT_0.5  | J1:CBN, J1:CBN-A, J1:DiP, J1:DiP-A, J1:OT, J1:OT-A, J5:CBN, J5:CBN-A, J5:DiP, J5:DiP-A, J5:OT, J5:OT-A, S1:CBN, S1:CBN-A, S5:CBN, S5:CBN-A, S5:DiP, S5:DiP-A, S5:OT, S5:OT-A                            |
| 733 | No          | 7       | 7-B  | 1000   | exp   | 0   | last   | singleC     | J1:CBN, J1:CBN-A, J1:DiP, J1:DiP-A, J1:OT, J1:OT-A, J5:CBN, J5:CBN-A, J5:DiP, J5:DiP-A, J5:OT, J5:OT-A, S1:DiP, S1:DiP-A, S1:OT, S1:OT-A, S5:CBN, S5:CBN-A, S5:DiP, S5:DiP-A, S5:OT, S5:OT-A            |
| 734 | No          | 7       | 7-B  | 1000   | exp   | 0   | last   | wholeT_0.01 | J1:CBN, J1:CBN-A, J1:DiP, J1:DiP-A, J1:OT, J1:OT-A, J5:CBN, J5:CBN-A, J5:DiP, J5:DiP-A, J5:OT, J5:OT-A, S1:CBN, S1:CBN-A, S1:DiP, S1:DiP-A, S1:OT, S1:OT-A, S5:CBN, S5:DiP, S5:DiP-A, S5:OT, S5:OT-A    |
| 735 | No          | 7       | 7-B  | 1000   | exp   | 0   | last   | wholeT_0.5  | J1:CBN, J1:CBN-A, J1:DiP, J1:DiP-A, J1:OT, J1:OT-A, J5:CBN, J5:CBN-A, J5:DiP, J5:DiP-A, J5:OT, J5:OT-A, S1:DiP, S1:OT, S1:OT-A, S5:CBN, S5:CBN-A, S5:DiP, S5:DiP-A, S5:OT, S5:OT-A                      |
| 736 | No          | 7       | 7-B  | 1000   | exp   | 0   | unif   | singleC     | J1:CBN, J1:CBN-A, J1:DiP, J1:DiP-A, J1:OT, J1:OT-A, J5:CBN, J5:CBN-A, J5:DiP, J5:DiP-A, J5:OT, J5:OT-A, S1:CBN, S1:CBN-A, S1:DiP, S1:DiP-A, S1:OT, S1:OT-A, S5:CBN, S5:CBN-A, S5:DiP, S5:DiP-A, S5:OT-A |

Table 16: (continued)

|     | Conjunction | Drivers | Tree | S.Size | Model | sh  | S.Time | S.Type      | Best method(s)                                                                                                                                                               |
|-----|-------------|---------|------|--------|-------|-----|--------|-------------|------------------------------------------------------------------------------------------------------------------------------------------------------------------------------|
| 737 | No          | 7       | 7-B  | 1000   | exp   | 0   | unif   | wholeT_0.01 | J1:CBN, J1:CBN-A, J1:DiP, J1:DiP-A, J1:OT, J1:OT-A, J5:CBN, J5:CBN-A, J5:DiP, J5:DiP-A, J5:OT, J5:OT-A, S5:CBN, S5:CBN-A, S5:DiP, S5:DiP-A, S5:OT, S5:OT-A                   |
| 738 | No          | 7       | 7-B  | 1000   | exp   | 0   | unif   | wholeT_0.5  | none                                                                                                                                                                         |
| 739 | No          | 7       | 7-B  | 1000   | exp   | Inf | last   | singleC     | J1:DiP, J1:OT, J1:OT-A, J5:CBN-A, J5:DiP, J5:DiP-A, J5:OT, J5:OT-A, S1:DiP, S1:DiP-A, S1:OT-A, S5:DiP, S5:DiP-A, S5:OT, S5:OT-A                                              |
| 740 | No          | 7       | 7-B  | 1000   | exp   | Inf | last   | wholeT_0.01 | J1:CBN, J1:CBN-A, J1:OT, J1:OT-A, J5:CBN, J5:CBN-A, J5:DiP, J5:DiP-A, J5:OT, J5:OT-A, S5:CBN, S5:OT, S5:OT-A                                                                 |
| 741 | No          | 7       | 7-B  | 1000   | exp   | Inf | last   | wholeT_0.5  | J1:DiP, J1:DiP-A, J1:OT, J1:OT-A, J5:CBN, J5:CBN-A, J5:DiP, J5:DiP-A, J5:OT, J5:OT-A, S1:DiP, S1:DiP-A, S1:OT, S1:OT-A, S5:DiP, S5:DiP-A, S5:OT, S5:OT-A                     |
| 742 | No          | 7       | 7-B  | 1000   | exp   | Inf | unif   | singleC     | J1:CBN, J1:CBN-A, J1:DiP, J1:DiP-A, J1:OT, J1:OT-A, J5:CBN, J5:CBN-A, J5:DiP, J5:DiP-A, J5:OT, J5:OT-A, S1:CBN, S1:CBN-A, S5:CBN, S5:CBN-A, S5:DiP, S5:DiP-A, S5:OT, S5:OT-A |
| 743 | No          | 7       | 7-B  | 1000   | exp   | Inf | unif   | wholeT_0.01 | J1:CBN, J1:CBN-A, J5:CBN, J5:CBN-A, J5:DiP-A, J5:OT, J5:OT-A, S5:CBN, S5:CBN-A                                                                                               |
| 744 | No          | 7       | 7-B  | 1000   | exp   | Inf | unif   | wholeT_0.5  | J1:CBN, J1:CBN-A, J1:DiP, J1:DiP-A, J1:OT, J1:OT-A, J5:CBN, J5:CBN-A, J5:DiP, J5:DiP-A, J5:OT, J5:OT-A, S1:CBN, S1:CBN-A, S1:DiP, S5:CBN, S5:CBN-A, S5:DiP, S5:DiP-A, S5:OT  |
| 745 | No          | 7       | 7-B  | 1000   | McF_4 | 0   | last   | singleC     | J1:DiP, J1:DiP-A, J1:OT, J1:OT-A, J5:DiP, J5:DiP-A, J5:OT, J5:OT-A, S1:DiP, S1:DiP-A, S1:OT, S1:OT-A, S5:DiP, S5:DiP-A, S5:OT, S5:OT-A                                       |
| 746 | No          | 7       | 7-B  | 1000   | McF_4 | 0   | last   | wholeT_0.01 | J1:CBN-A, J1:DiP, J1:DiP-A, J1:OT, J1:OT-A, J5:CBN-A, J5:DiP, J5:DiP-A, J5:OT, J5:OT-A, S1:DiP, S1:DiP-A, S5:DiP, S5:DiP-A, S5:OT, S5:OT-A                                   |

Table 16: (continued)

|     | Conjunction | Drivers | Tree | S.Size | Model | sh  | S.Time | S.Type      | Best method(s)                                                                                                                                                                     |
|-----|-------------|---------|------|--------|-------|-----|--------|-------------|------------------------------------------------------------------------------------------------------------------------------------------------------------------------------------|
| 747 | No          | 7       | 7-B  | 1000   | McF_4 | 0   | last   | wholeT_0.5  | J1:DiP, J1:DiP-A, J1:OT-A, J5:DiP, J5:DiP-A, J5:OT, J5:OT-A, S1:DiP, S1:DiP-A, S1:OT, S1:OT-A, S5:DiP, S5:DiP-A, S5:OT, S5:OT-A                                                    |
| 748 | No          | 7       | 7-B  | 1000   | McF_4 | 0   | unif   | singleC     | J1:CBN, J1:CBN-A, J1:DiP, J1:OT, J1:OT-A, J5:CBN, J5:CBN-A, J5:DiP, J5:DiP-A, J5:OT, J5:OT-A, S1:DiP, S1:DiP-A, S1:OT, S1:OT-A, S5:CBN, S5:CBN-A, S5:DiP, S5:DiP-A, S5:OT, S5:OT-A |
| 749 | No          | 7       | 7-B  | 1000   | McF_4 | 0   | unif   | wholeT_0.01 | J1:CBN, J1:CBN-A, J1:DiP-A, J1:OT-A, J5:CBN, J5:CBN-A, J5:DiP, J5:DiP-A, J5:OT, J5:OT-A, S1:DiP, S5:CBN, S5:CBN-A, S5:DiP, S5:DiP-A, S5:OT, S5:OT-A                                |
| 750 | No          | 7       | 7-B  | 1000   | McF_4 | 0   | unif   | wholeT_0.5  | J1:CBN, J1:CBN-A, J1:DiP, J1:DiP-A, J1:OT, J1:OT-A, J5:CBN, J5:CBN-A, J5:DiP, J5:DiP-A, J5:OT, S1:DiP, S1:DiP-A, S1:OT, S5:CBN-A, S5:DiP, S5:DiP-A, S5:OT, S5:OT-A                 |
| 751 | No          | 7       | 7-B  | 1000   | McF_4 | Inf | last   | singleC     | J1:DiP, J1:DiP-A, J1:OT, J1:OT-A, J5:DiP, J5:DiP-A, J5:OT, J5:OT-A, S1:DiP, S1:DiP-A, S1:OT, S1:OT-A, S5:DiP, S5:DiP-A, S5:OT, S5:OT-A                                             |
| 752 | No          | 7       | 7-B  | 1000   | McF_4 | Inf | last   | wholeT_0.01 | J1:DiP, J1:DiP-A, J1:OT, J1:OT-A, J5:DiP, J5:DiP-A, J5:OT, J5:OT-A, S5:DiP, S5:DiP-A, S5:OT, S5:OT-A                                                                               |
| 753 | No          | 7       | 7-B  | 1000   | McF_4 | Inf | last   | wholeT_0.5  | J1:DiP, J1:DiP-A, J1:OT, J1:OT-A, J5:DiP, J5:DiP-A, J5:OT, J5:OT-A, S1:DiP, S1:DiP-A, S1:OT, S1:OT-A, S5:DiP, S5:DiP-A, S5:OT, S5:OT-A                                             |
| 754 | No          | 7       | 7-B  | 1000   | McF_4 | Inf | unif   | singleC     | J1:CBN, J1:CBN-A, J1:DiP, J1:OT, J1:OT-A, J5:CBN, J5:CBN-A, J5:DiP, J5:DiP-A, J5:OT, J5:OT-A, S1:DiP, S1:DiP-A, S1:OT, S1:OT-A, S5:CBN, S5:CBN-A, S5:DiP, S5:DiP-A, S5:OT, S5:OT-A |

Table 16: (continued)

|     | Conjunction | Drivers | Tree | S.Size | Model | sh  | S.Time | S.Type      | Best method(s)                                                                                                                                             |
|-----|-------------|---------|------|--------|-------|-----|--------|-------------|------------------------------------------------------------------------------------------------------------------------------------------------------------|
| 755 | No          | 7       | 7-B  | 1000   | McF_4 | Inf | unif   | wholeT_0.01 | J1:CBN, J1:CBN-A, J1:DiP, J1:DiP-A, J1:OT, J1:OT-A, J5:CBN, J5:CBN-A, J5:DiP, J5:DiP-A, J5:OT, J5:OT-A, S5:CBN, S5:CBN-A, S5:DiP, S5:DiP-A, S5:OT, S5:OT-A |
| 756 | No          | 7       | 7-B  | 1000   | McF_4 | Inf | unif   | wholeT_0.5  | J1:CBN, J1:CBN-A, J1:DiP, J1:DiP-A, J1:OT, J1:OT-A, J5:CBN-A, J5:DiP-A, J5:OT, S1:DiP, S1:OT, S1:OT-A, S5:CBN, S5:CBN-A, S5:DiP, S5:OT, S5:OT-A            |
| 757 | No          | 7       | 7-B  | 1000   | McF_6 | 0   | last   | singleC     | J1:DiP, J1:DiP-A, J1:OT, J1:OT-A, J5:DiP, J5:DiP-A, J5:OT, J5:OT-A, S1:DiP, S1:DiP-A, S5:DiP, S5:DiP-A, S5:OT, S5:OT-A                                     |
| 758 | No          | 7       | 7-B  | 1000   | McF_6 | 0   | last   | wholeT_0.01 | J1:DiP, J1:DiP-A, J5:DiP, J5:DiP-A, J5:OT, J5:OT-A, S1:DiP, S1:DiP-A, S5:OT, S5:OT-A                                                                       |
| 759 | No          | 7       | 7-B  | 1000   | McF_6 | 0   | last   | wholeT_0.5  | J1:DiP, J1:DiP-A, J1:OT, J1:OT-A, J5:DiP, J5:DiP-A, J5:OT, J5:OT-A, S1:DiP, S1:DiP-A, S1:OT, S1:OT-A, S5:DiP, S5:DiP-A, S5:OT, S5:OT-A                     |
| 760 | No          | 7       | 7-B  | 1000   | McF_6 | 0   | unif   | singleC     | none                                                                                                                                                       |
| 761 | No          | 7       | 7-B  | 1000   | McF_6 | 0   | unif   | wholeT_0.01 | J1:CBN, J1:CBN-A, J1:DiP, J1:DiP-A, J1:OT, J1:OT-A, J5:CBN, J5:CBN-A, J5:DiP, J5:DiP-A, J5:OT, J5:OT-A, S5:CBN, S5:CBN-A, S5:DiP, S5:DiP-A, S5:OT, S5:OT-A |
| 762 | No          | 7       | 7-B  | 1000   | McF_6 | 0   | unif   | wholeT_0.5  | none                                                                                                                                                       |
| 763 | No          | 7       | 7-B  | 1000   | McF_6 | Inf | last   | singleC     | J1:DiP, J1:DiP-A, J1:OT, J1:OT-A, J5:DiP, J5:DiP-A, J5:OT, J5:OT-A, S1:DiP, S1:DiP-A, S5:DiP, S5:DiP-A, S5:OT, S5:OT-A                                     |
| 764 | No          | 7       | 7-B  | 1000   | McF_6 | Inf | last   | wholeT_0.01 | J1:DiP, J1:DiP-A, J5:DiP, J5:DiP-A, J5:OT, J5:OT-A, S1:DiP, S1:DiP-A, S5:DiP, S5:DiP-A, S5:OT, S5:OT-A                                                     |
| 765 | No          | 7       | 7-B  | 1000   | McF_6 | Inf | last   | wholeT_0.5  | J1:DiP, J1:DiP-A, J1:OT, J1:OT-A, J5:DiP, J5:DiP-A, J5:OT, J5:OT-A, S1:DiP, S1:DiP-A, S1:OT-A, S5:DiP, S5:DiP-A, S5:OT, S5:OT-A                            |
| 766 | No          | 7       | 7-B  | 1000   | McF_6 | Inf | unif   | singleC     | none                                                                                                                                                       |

Table 16: (continued)

|     | Conjunction | Drivers | Tree | S.Size | Model | sh  | S.Time | S.Type      | Best method(s)                                                                                                                                                                                         |
|-----|-------------|---------|------|--------|-------|-----|--------|-------------|--------------------------------------------------------------------------------------------------------------------------------------------------------------------------------------------------------|
| 767 | No          | 7       | 7-B  | 1000   | McF_6 | Inf | unif   | wholeT_0.01 | J1:CBN, J1:CBN-A, J1:DiP, J1:DiP-A, J1:OT, J1:OT-A, J5:CBN, J5:CBN-A, J5:DiP, J5:DiP-A, J5:OT-A, S5:CBN, S5:CBN-A, S5:DiP, S5:DiP-A, S5:OT                                                             |
| 768 | No          | 7       | 7-B  | 1000   | McF_6 | Inf | unif   | wholeT_0.5  | none                                                                                                                                                                                                   |
| 769 | No          | 7       | 7-B  | 200    | Bozic | 0   | last   | singleC     | J1:CBN, J1:CBN-A, J1:DiP, J1:DiP-A, J1:OT, J1:OT-A, J5:CBN, J5:CBN-A, J5:DiP, J5:DiP-A, J5:OT, J5:OT-A, S1:DiP, S1:DiP-A, S5:DiP, S5:DiP-A, S5:OT, S5:OT-A                                             |
| 770 | No          | 7       | 7-B  | 200    | Bozic | 0   | last   | wholeT_0.01 | J1:CBN, J1:CBN-A, J1:DiP, J1:DiP-A, J1:OT, J1:OT-A, J5:CBN, J5:CBN-A, J5:DiP, J5:DiP-A, J5:OT, J5:OT-A, S1:DiP, S1:DiP-A, S5:CBN, S5:CBN-A, S5:DiP, S5:DiP-A, S5:OT, S5:OT-A                           |
| 771 | No          | 7       | 7-B  | 200    | Bozic | 0   | last   | wholeT_0.5  | J1:CBN, J1:CBN-A, J1:DiP, J1:DiP-A, J1:OT, J1:OT-A, J5:CBN, J5:CBN-A, J5:DiP, J5:DiP-A, J5:OT, J5:OT-A, S1:DiP, S1:DiP-A, S1:OT, S5:CBN, S5:DiP, S5:DiP-A, S5:OT, S5:OT-A                              |
| 772 | No          | 7       | 7-B  | 200    | Bozic | 0   | unif   | singleC     | J1:CBN, J1:CBN-A, J1:DiP, J1:DiP-A, J1:OT, J1:OT-A, J5:CBN, J5:CBN-A, J5:DiP, J5:DiP-A, J5:OT, J5:OT-A, S1:DiP, S1:DiP-A, S1:OT-A, S5:CBN-A, S5:DiP-A, S5:OT, S5:OT-A                                  |
| 773 | No          | 7       | 7-B  | 200    | Bozic | 0   | unif   | wholeT_0.01 | J5:CBN, J5:CBN-A, J5:DiP, J5:DiP-A, J5:OT, J5:OT-A                                                                                                                                                     |
| 774 | No          | 7       | 7-B  | 200    | Bozic | 0   | unif   | wholeT_0.5  | J1:CBN, J1:CBN-A, J1:DiP, J1:DiP-A, J1:OT, J1:OT-A, J5:CBN, J5:CBN-A, J5:DiP, J5:DiP-A, J5:OT, J5:OT-A, S1:CBN-A, S1:DiP, S1:DiP-A, S1:OT, S1:OT-A, S5:CBN, S5:CBN-A, S5:DiP, S5:DiP-A, S5:OT, S5:OT-A |
| 775 | No          | 7       | 7-B  | 200    | Bozic | Inf | last   | singleC     | J1:DiP, J1:DiP-A, J5:CBN, J5:CBN-A, J5:DiP, J5:DiP-A, J5:OT, J5:OT-A, S5:DiP, S5:DiP-A, S5:OT-A                                                                                                        |
| 776 | No          | 7       | 7-B  | 200    | Bozic | Inf | last   | wholeT_0.01 | J5:CBN, J5:CBN-A, J5:DiP, J5:OT, J5:OT-A                                                                                                                                                               |

Table 16: (continued)

|     | Conjunction | Drivers | Tree | S.Size | Model | sh  | S.Time | S.Type      | Best method(s)                                                                                                                                                                                         |
|-----|-------------|---------|------|--------|-------|-----|--------|-------------|--------------------------------------------------------------------------------------------------------------------------------------------------------------------------------------------------------|
| 777 | No          | 7       | 7-B  | 200    | Bozic | Inf | last   | wholeT_0.5  | J1:DiP, J1:DiP-A, J1:OT-A, J5:CBN, J5:CBN-A, J5:DiP, J5:DiP-A, J5:OT, J5:OT-A, S1:DiP, S5:DiP, S5:DiP-A, S5:OT, S5:OT-A                                                                                |
| 778 | No          | 7       | 7-B  | 200    | Bozic | Inf | unif   | singleC     | J1:CBN, J1:CBN-A, J5:CBN, J5:CBN-A, J5:DiP, J5:DiP-A, J5:OT, J5:OT-A, S5:CBN, S5:CBN-A, S5:DiP, S5:DiP-A, S5:OT-A                                                                                      |
| 779 | No          | 7       | 7-B  | 200    | Bozic | Inf | unif   | wholeT_0.01 | J5:CBN, J5:CBN-A, J5:OT, J5:OT-A, S5:CBN, S5:CBN-A, S5:OT, S5:OT-A                                                                                                                                     |
| 780 | No          | 7       | 7-B  | 200    | Bozic | Inf | unif   | wholeT_0.5  | J1:CBN, J1:CBN-A, J1:DiP, J5:CBN, J5:CBN-A, J5:DiP, J5:DiP-A, J5:OT, J5:OT-A, S5:CBN, S5:CBN-A, S5:DiP, S5:DiP-A, S5:OT, S5:OT-A                                                                       |
| 781 | No          | 7       | 7-B  | 200    | exp   | 0   | last   | singleC     | J1:CBN, J1:CBN-A, J1:DiP, J1:DiP-A, J1:OT, J1:OT-A, J5:CBN, J5:CBN-A, J5:DiP, J5:DiP-A, J5:OT, J5:OT-A, S1:DiP, S1:DiP-A, S1:OT, S1:OT-A, S5:CBN, S5:CBN-A, S5:DiP, S5:DiP-A, S5:OT, S5:OT-A           |
| 782 | No          | 7       | 7-B  | 200    | exp   | 0   | last   | wholeT_0.01 | J1:CBN, J1:CBN-A, J1:DiP, J1:DiP-A, J1:OT, J1:OT-A, J5:CBN, J5:CBN-A, J5:DiP, J5:DiP-A, J5:OT, J5:OT-A, S1:CBN, S1:DiP, S1:DiP-A, S5:CBN, S5:CBN-A, S5:DiP, S5:DiP-A                                   |
| 783 | No          | 7       | 7-B  | 200    | exp   | 0   | last   | wholeT_0.5  | J1:CBN, J1:CBN-A, J1:DiP, J1:DiP-A, J1:OT, J1:OT-A, J5:CBN, J5:CBN-A, J5:DiP, J5:DiP-A, J5:OT, J5:OT-A, S1:CBN-A, S1:DiP, S1:DiP-A, S1:OT, S1:OT-A, S5:CBN, S5:CBN-A, S5:DiP, S5:DiP-A, S5:OT, S5:OT-A |
| 784 | No          | 7       | 7-B  | 200    | exp   | 0   | unif   | singleC     | none                                                                                                                                                                                                   |
| 785 | No          | 7       | 7-B  | 200    | exp   | 0   | unif   | wholeT_0.01 | J1:CBN, J1:DiP, J1:DiP-A, J1:OT, J1:OT-A, J5:CBN, J5:CBN-A, J5:DiP, J5:DiP-A, J5:OT, J5:OT-A, S1:DiP, S5:CBN, S5:CBN-A, S5:DiP, S5:DiP-A, S5:OT, S5:OT-A                                               |
| 786 | No          | 7       | 7-B  | 200    | exp   | 0   | unif   | wholeT_0.5  | none                                                                                                                                                                                                   |

Table 16: (continued)

|     | Conjunction | Drivers | Tree | S.Size | Model | sh  | S.Time | S.Type      | Best method(s)                                                                                                                                                                                 |
|-----|-------------|---------|------|--------|-------|-----|--------|-------------|------------------------------------------------------------------------------------------------------------------------------------------------------------------------------------------------|
| 787 | No          | 7       | 7-B  | 200    | exp   | Inf | last   | singleC     | J1:DiP, J1:DiP-A, J1:OT-A, J5:CBN, J5:CBN-A, J5:DiP, J5:OT, J5:OT-A, S1:DiP, S1:DiP-A, S5:DiP, S5:DiP-A, S5:OT, S5:OT-A                                                                        |
| 788 | No          | 7       | 7-B  | 200    | exp   | Inf | last   | wholeT_0.01 | J5:CBN, J5:CBN-A, J5:DiP, J5:DiP-A, J5:OT, J5:OT-A, S5:CBN-A, S5:DiP                                                                                                                           |
| 789 | No          | 7       | 7-B  | 200    | exp   | Inf | last   | wholeT_0.5  | J1:DiP, J1:DiP-A, J1:OT, J1:OT-A, J5:CBN, J5:CBN-A, J5:DiP, J5:DiP-A, J5:OT, J5:OT-A, S1:DiP, S1:DiP-A, S5:DiP, S5:DiP-A, S5:OT, S5:OT-A                                                       |
| 790 | No          | 7       | 7-B  | 200    | exp   | Inf | unif   | singleC     | J1:CBN, J1:CBN-A, J1:DiP, J1:DiP-A, J1:OT, J1:OT-A, J5:CBN, J5:CBN-A, J5:DiP, J5:DiP-A, J5:OT, J5:OT-A, S5:CBN, S5:CBN-A, S5:DiP, S5:DiP-A, S5:OT, S5:OT-A                                     |
| 791 | No          | 7       | 7-B  | 200    | exp   | Inf | unif   | wholeT_0.01 | J5:CBN, J5:CBN-A, J5:DiP-A, J5:OT, J5:OT-A, S5:CBN, S5:CBN-A, S5:OT                                                                                                                            |
| 792 | No          | 7       | 7-B  | 200    | exp   | Inf | unif   | wholeT_0.5  | J1:CBN, J1:CBN-A, J1:DiP, J1:DiP-A, J1:OT, J1:OT-A, J5:CBN, J5:CBN-A, J5:DiP, J5:DiP-A, J5:OT, J5:OT-A, S1:CBN, S1:CBN-A, S1:DiP, S1:DiP-A, S5:CBN, S5:CBN-A, S5:DiP, S5:DiP-A, S5:OT, S5:OT-A |
| 793 | No          | 7       | 7-B  | 200    | McF_4 | 0   | last   | singleC     | J1:DiP, J1:DiP-A, J1:OT, J1:OT-A, J5:DiP, J5:DiP-A, J5:OT, J5:OT-A, S1:DiP, S1:DiP-A, S5:DiP, S5:DiP-A, S5:OT, S5:OT-A                                                                         |
| 794 | No          | 7       | 7-B  | 200    | McF_4 | 0   | last   | wholeT_0.01 | J1:DiP, J1:DiP-A, J1:OT-A, J5:DiP, J5:DiP-A, J5:OT, J5:OT-A, S1:DiP, S1:DiP-A, S5:DiP-A, S5:OT, S5:OT-A                                                                                        |
| 795 | No          | 7       | 7-B  | 200    | McF_4 | 0   | last   | wholeT_0.5  | J1:DiP, J1:DiP-A, J1:OT, J1:OT-A, J5:DiP, J5:DiP-A, J5:OT, J5:OT-A, S1:DiP, S1:DiP-A, S5:DiP, S5:DiP-A, S5:OT, S5:OT-A                                                                         |
| 796 | No          | 7       | 7-B  | 200    | McF_4 | 0   | unif   | singleC     | J1:CBN, J1:CBN-A, J1:DiP, J1:DiP-A, J1:OT, J1:OT-A, J5:CBN, J5:CBN-A, J5:DiP, J5:DiP-A, J5:OT, J5:OT-A, S1:DiP, S5:CBN-A, S5:DiP, S5:DiP-A, S5:OT, S5:OT-A                                     |

Table 16: (continued)

|     | Conjunction | Drivers | Tree | S.Size | Model | sh  | S.Time | S.Type      | Best method(s)                                                                                                                                                               |
|-----|-------------|---------|------|--------|-------|-----|--------|-------------|------------------------------------------------------------------------------------------------------------------------------------------------------------------------------|
| 797 | No          | 7       | 7-B  | 200    | McF_4 | 0   | unif   | wholeT_0.01 | J1:CBN, J1:CBN-A, J1:DiP, J1:DiP-A, J1:OT, J1:OT-A, J5:CBN, J5:CBN-A, J5:DiP, J5:DiP-A, J5:OT, J5:OT-A, S5:CBN, S5:CBN-A, S5:DiP, S5:DiP-A, S5:OT, S5:OT-A                   |
| 798 | No          | 7       | 7-B  | 200    | McF_4 | 0   | unif   | wholeT_0.5  | J1:CBN, J1:CBN-A, J1:DiP, J1:DiP-A, J1:OT, J5:CBN, J5:CBN-A, J5:DiP, J5:DiP-A, J5:OT, J5:OT-A, S1:DiP, S5:CBN, S5:CBN-A, S5:DiP, S5:DiP-A, S5:OT, S5:OT-A                    |
| 799 | No          | 7       | 7-B  | 200    | McF_4 | Inf | last   | singleC     | J1:DiP, J1:DiP-A, J1:OT, J1:OT-A, J5:DiP, J5:DiP-A, J5:OT, J5:OT-A, S1:DiP, S1:DiP-A, S5:DiP, S5:DiP-A, S5:OT, S5:OT-A                                                       |
| 800 | No          | 7       | 7-B  | 200    | McF_4 | Inf | last   | wholeT_0.01 | J1:DiP, J1:DiP-A, J1:OT-A, J5:DiP, J5:DiP-A, J5:OT, J5:OT-A, S1:DiP, S1:DiP-A, S5:DiP, S5:DiP-A, S5:OT, S5:OT-A                                                              |
| 801 | No          | 7       | 7-B  | 200    | McF_4 | Inf | last   | wholeT_0.5  | J1:DiP, J1:DiP-A, J1:OT, J1:OT-A, J5:DiP, J5:DiP-A, J5:OT, J5:OT-A, S1:DiP, S1:DiP-A, S5:DiP, S5:DiP-A, S5:OT-A                                                              |
| 802 | No          | 7       | 7-B  | 200    | McF_4 | Inf | unif   | singleC     | J1:CBN, J1:CBN-A, J1:DiP, J1:DiP-A, J1:OT, J1:OT-A, J5:CBN, J5:CBN-A, J5:DiP, J5:DiP-A, J5:OT, J5:OT-A, S1:DiP, S1:DiP-A, S5:CBN, S5:CBN-A, S5:DiP, S5:DiP-A, S5:OT, S5:OT-A |
| 803 | No          | 7       | 7-B  | 200    | McF_4 | Inf | unif   | wholeT_0.01 | J1:CBN, J1:CBN-A, J1:DiP, J1:DiP-A, J1:OT, J1:OT-A, J5:CBN, J5:CBN-A, J5:DiP, J5:DiP-A, J5:OT-A, S1:DiP, S5:CBN, S5:CBN-A, S5:DiP, S5:DiP-A, S5:OT                           |
| 804 | No          | 7       | 7-B  | 200    | McF_4 | Inf | unif   | wholeT_0.5  | J1:CBN, J1:CBN-A, J1:DiP, J1:DiP-A, J1:OT, J1:OT-A, J5:CBN, J5:CBN-A, J5:DiP, J5:DiP-A, J5:OT, J5:OT-A, S1:DiP, S1:DiP-A, S5:CBN, S5:DiP, S5:DiP-A, S5:OT, S5:OT-A           |



Table 16: (continued)

|     | Conjunction | Drivers | Tree | S.Size | Model | sh  | S.Time | S.Type      | Best method(s)                                                                                                                                              |
|-----|-------------|---------|------|--------|-------|-----|--------|-------------|-------------------------------------------------------------------------------------------------------------------------------------------------------------|
| 805 | No          | 7       | 7-B  | 200    | McF_6 | 0   | last   | singleC     | J1:DiP, J1:DiP-A, J1:OT, J1:OT-A, J5:DiP, J5:DiP-A, J5:OT, J5:OT-A, S1:DiP, S1:DiP-A, S5:DiP, S5:DiP-A, S5:OT, S5:OT-A                                      |
| 806 | No          | 7       | 7-B  | 200    | McF_6 | 0   | last   | wholeT_0.01 | J1:DiP, J1:DiP-A, J5:DiP, J5:DiP-A, J5:OT, J5:OT-A, S1:DiP, S1:DiP-A, S5:DiP, S5:DiP-A, S5:OT, S5:OT-A                                                      |
| 807 | No          | 7       | 7-B  | 200    | McF_6 | 0   | last   | wholeT_0.5  | J1:DiP, J1:DiP-A, J1:OT, J5:DiP, J5:DiP-A, J5:OT, J5:OT-A, S1:DiP, S1:DiP-A, S5:DiP, S5:DiP-A, S5:OT, S5:OT-A                                               |
| 808 | No          | 7       | 7-B  | 200    | McF_6 | 0   | unif   | singleC     | J1:CBN, J1:CBN-A, J1:DiP, J1:OT-A, J5:CBN, J5:CBN-A, J5:DiP, J5:DiP-A, J5:OT, J5:OT-A, S1:DiP, S1:DiP-A, S5:CBN, S5:CBN-A, S5:DiP, S5:DiP-A, S5:OT, S5:OT-A |
| 809 | No          | 7       | 7-B  | 200    | McF_6 | 0   | unif   | wholeT_0.01 | J1:CBN, J1:CBN-A, J1:DiP, J1:DiP-A, J1:OT, J5:CBN, J5:CBN-A, J5:DiP, J5:OT, J5:OT-A, S1:DiP, S1:DiP-A, S5:CBN-A, S5:DiP, S5:DiP-A, S5:OT, S5:OT-A           |
| 810 | No          | 7       | 7-B  | 200    | McF_6 | 0   | unif   | wholeT_0.5  | J1:CBN, J1:CBN-A, J1:DiP, J5:CBN, J5:CBN-A, J5:DiP, J5:DiP-A, J5:OT, S1:DiP, S5:CBN, S5:CBN-A, S5:OT, S5:OT-A                                               |
| 811 | No          | 7       | 7-B  | 200    | McF_6 | Inf | last   | singleC     | J1:DiP, J1:DiP-A, J1:OT, J1:OT-A, J5:DiP, J5:DiP-A, J5:OT, J5:OT-A, S1:DiP, S1:DiP-A, S5:DiP, S5:DiP-A, S5:OT, S5:OT-A                                      |
| 812 | No          | 7       | 7-B  | 200    | McF_6 | Inf | last   | wholeT_0.01 | J1:DiP, J5:DiP, J5:OT, J5:OT-A, S1:DiP, S5:DiP, S5:OT, S5:OT-A                                                                                              |
| 813 | No          | 7       | 7-B  | 200    | McF_6 | Inf | last   | wholeT_0.5  | J1:DiP, J1:DiP-A, J1:OT, J1:OT-A, J5:DiP, J5:DiP-A, J5:OT, J5:OT-A, S1:DiP, S5:DiP, S5:DiP-A, S5:OT, S5:OT-A                                                |
| 814 | No          | 7       | 7-B  | 200    | McF_6 | Inf | unif   | singleC     | J1:CBN, J1:CBN-A, J1:DiP, J1:DiP-A, J1:OT, J1:OT-A, J5:CBN, J5:CBN-A, J5:DiP, J5:DiP-A, J5:OT, S5:CBN, S5:CBN-A, S5:OT, S5:OT-A                             |

Table 16: (continued)

|     | Conjunction | Drivers | Tree | S.Size | Model | sh  | S.Time | S.Type      | Best method(s)                                                                                                                                                     |
|-----|-------------|---------|------|--------|-------|-----|--------|-------------|--------------------------------------------------------------------------------------------------------------------------------------------------------------------|
| 815 | No          | 7       | 7-B  | 200    | McF_6 | Inf | unif   | wholeT_0.01 | J1:DiP, J5:CBN, J5:CBN-A, J5:DiP, J5:DiP-A, S1:DiP, S5:CBN, S5:CBN-A, S5:DiP-A                                                                                     |
| 816 | No          | 7       | 7-B  | 200    | McF_6 | Inf | unif   | wholeT_0.5  | J1:CBN, J1:CBN-A, J1:DiP, J1:DiP-A, J5:CBN, J5:CBN-A, J5:DiP, J5:DiP-A, S5:CBN, S5:CBN-A, S5:DiP, S5:OT-A                                                          |
| 817 | No          | 7       | 7-B  | 100    | Bozic | 0   | last   | singleC     | J1:DiP, J1:DiP-A, J5:CBN, J5:CBN-A, J5:DiP, J5:DiP-A, J5:OT, J5:OT-A, S1:DiP, S1:DiP-A, S5:DiP, S5:DiP-A, S5:OT, S5:OT-A                                           |
| 818 | No          | 7       | 7-B  | 100    | Bozic | 0   | last   | wholeT_0.01 | J1:DiP, J1:DiP-A, J5:CBN, J5:CBN-A, J5:DiP, J5:DiP-A, J5:OT, J5:OT-A, S1:DiP, S1:DiP-A, S5:CBN, S5:CBN-A, S5:DiP, S5:DiP-A, S5:OT, S5:OT-A                         |
| 819 | No          | 7       | 7-B  | 100    | Bozic | 0   | last   | wholeT_0.5  | J1:DiP, J1:DiP-A, J5:CBN, J5:DiP, J5:OT-A, S1:DiP, S1:DiP-A, S5:CBN, S5:CBN-A, S5:DiP, S5:DiP-A, S5:OT, S5:OT-A                                                    |
| 820 | No          | 7       | 7-B  | 100    | Bozic | 0   | unif   | singleC     | J1:CBN, J1:DiP, J1:DiP-A, J1:OT, J1:OT-A, J5:CBN, J5:CBN-A, J5:DiP, J5:DiP-A, J5:OT, J5:OT-A, S1:DiP, S1:DiP-A, S5:CBN, S5:CBN-A, S5:DiP, S5:DiP-A, S5:OT, S5:OT-A |
| 821 | No          | 7       | 7-B  | 100    | Bozic | 0   | unif   | wholeT_0.01 | J5:CBN, J5:CBN-A, J5:DiP, J5:DiP-A, J5:OT, J5:OT-A                                                                                                                 |
| 822 | No          | 7       | 7-B  | 100    | Bozic | 0   | unif   | wholeT_0.5  | J1:CBN, J1:DiP, J1:DiP-A, J1:OT, J1:OT-A, J5:CBN, J5:CBN-A, J5:DiP, J5:DiP-A, J5:OT, J5:OT-A, S1:DiP, S1:DiP-A, S5:CBN, S5:CBN-A, S5:DiP, S5:DiP-A, S5:OT          |
| 823 | No          | 7       | 7-B  | 100    | Bozic | Inf | last   | singleC     | J1:DiP, J1:DiP-A, J5:CBN, J5:CBN-A, J5:DiP, J5:DiP-A, J5:OT, J5:OT-A, S1:DiP, S1:DiP-A, S5:DiP, S5:DiP-A                                                           |
| 824 | No          | 7       | 7-B  | 100    | Bozic | Inf | last   | wholeT_0.01 | J5:CBN, J5:CBN-A, J5:DiP                                                                                                                                           |
| 825 | No          | 7       | 7-B  | 100    | Bozic | Inf | last   | wholeT_0.5  | J1:DiP, J1:DiP-A, J5:CBN, J5:CBN-A, J5:DiP, J5:DiP-A, J5:OT, J5:OT-A, S1:DiP, S1:DiP-A, S5:DiP, S5:DiP-A                                                           |
| 826 | No          | 7       | 7-B  | 100    | Bozic | Inf | unif   | singleC     | J5:CBN, J5:CBN-A, J5:DiP, J5:DiP-A, J5:OT, J5:OT-A, S5:CBN, S5:CBN-A, S5:DiP                                                                                       |

Table 16: (continued)

|     | Conjunction | Drivers | Tree | S.Size | Model | sh  | S.Time | S.Type      | Best method(s)                                                                                                                                                                                  |
|-----|-------------|---------|------|--------|-------|-----|--------|-------------|-------------------------------------------------------------------------------------------------------------------------------------------------------------------------------------------------|
| 827 | No          | 7       | 7-B  | 100    | Bozic | Inf | unif   | wholeT_0.01 | J5:CBN, J5:CBN-A, J5:OT, J5:OT-A, S5:CBN                                                                                                                                                        |
| 828 | No          | 7       | 7-B  | 100    | Bozic | Inf | unif   | wholeT_0.5  | J5:CBN, J5:CBN-A, J5:DiP, J5:DiP-A, J5:OT, J5:OT-A, S5:CBN, S5:DiP, S5:DiP-A, S5:OT, S5:OT-A                                                                                                    |
| 829 | No          | 7       | 7-B  | 100    | exp   | 0   | last   | singleC     | J1:CBN, J1:CBN-A, J1:DiP, J1:DiP-A, J1:OT, J1:OT-A, J5:CBN, J5:CBN-A, J5:DiP, J5:DiP-A, J5:OT, J5:OT-A, S1:DiP, S1:DiP-A, S1:OT, S1:OT-A, S5:CBN, S5:CBN-A, S5:DiP, S5:DiP-A, S5:OT, S5:OT-A    |
| 830 | No          | 7       | 7-B  | 100    | exp   | 0   | last   | wholeT_0.01 | J1:CBN, J1:CBN-A, J1:DiP, J1:DiP-A, J5:CBN, J5:CBN-A, J5:DiP, J5:DiP-A, J5:OT, J5:OT-A, S1:DiP, S1:DiP-A, S5:CBN, S5:CBN-A, S5:DiP, S5:DiP-A                                                    |
| 831 | No          | 7       | 7-B  | 100    | exp   | 0   | last   | wholeT_0.5  | J1:CBN, J1:CBN-A, J1:DiP, J1:DiP-A, J1:OT, J1:OT-A, J5:CBN, J5:CBN-A, J5:DiP, J5:DiP-A, J5:OT, J5:OT-A, S1:DiP, S1:DiP-A, S1:OT, S5:CBN, S5:CBN-A, S5:DiP, S5:DiP-A, S5:OT, S5:OT-A             |
| 832 | No          | 7       | 7-B  | 100    | exp   | 0   | unif   | singleC     | J1:CBN, J1:CBN-A, J1:DiP, J1:DiP-A, J1:OT, J1:OT-A, J5:CBN, J5:CBN-A, J5:DiP, J5:DiP-A, J5:OT, J5:OT-A, S1:DiP, S1:DiP-A, S1:OT-A, S5:CBN, S5:CBN-A, S5:DiP, S5:DiP-A, S5:OT                    |
| 833 | No          | 7       | 7-B  | 100    | exp   | 0   | unif   | wholeT_0.01 | J1:DiP, J1:DiP-A, J5:CBN, J5:CBN-A, J5:DiP, J5:DiP-A, J5:OT, J5:OT-A, S1:DiP, S1:DiP-A, S5:CBN, S5:CBN-A, S5:DiP, S5:DiP-A, S5:OT, S5:OT-A                                                      |
| 834 | No          | 7       | 7-B  | 100    | exp   | 0   | unif   | wholeT_0.5  | J1:CBN-A, J1:DiP, J1:DiP-A, J1:OT, J1:OT-A, J5:CBN, J5:CBN-A, J5:DiP, J5:DiP-A, J5:OT, J5:OT-A, S1:CBN, S1:CBN-A, S1:DiP, S1:DiP-A, S1:OT-A, S5:CBN, S5:CBN-A, S5:DiP, S5:DiP-A, S5:OT, S5:OT-A |
| 835 | No          | 7       | 7-B  | 100    | exp   | Inf | last   | singleC     | J1:DiP, J1:DiP-A, J1:OT, J1:OT-A, J5:CBN, J5:CBN-A, J5:DiP, J5:DiP-A, J5:OT, J5:OT-A, S1:DiP, S1:DiP-A, S5:DiP, S5:DiP-A, S5:OT, S5:OT-A                                                        |

Table 16: (continued)

|     | Conjunction | Drivers | Tree | S.Size | Model | sh  | S.Time | S.Type      | Best method(s)                                                                                                                                                     |
|-----|-------------|---------|------|--------|-------|-----|--------|-------------|--------------------------------------------------------------------------------------------------------------------------------------------------------------------|
| 836 | No          | 7       | 7-B  | 100    | exp   | Inf | last   | wholeT_0.01 | J5:DiP, J5:DiP-A                                                                                                                                                   |
| 837 | No          | 7       | 7-B  | 100    | exp   | Inf | last   | wholeT_0.5  | J1:DiP, J1:DiP-A, J1:OT, J5:CBN, J5:CBN-A, J5:DiP, J5:DiP-A, J5:OT, J5:OT-A, S1:DiP, S1:DiP-A, S5:DiP, S5:DiP-A, S5:OT, S5:OT-A                                    |
| 838 | No          | 7       | 7-B  | 100    | exp   | Inf | unif   | singleC     | J1:DiP, J1:DiP-A, J5:CBN, J5:CBN-A, J5:DiP, J5:DiP-A, J5:OT, J5:OT-A, S1:DiP, S1:DiP-A, S5:CBN, S5:CBN-A, S5:DiP, S5:DiP-A, S5:OT, S5:OT-A                         |
| 839 | No          | 7       | 7-B  | 100    | exp   | Inf | unif   | wholeT_0.01 | J5:CBN, J5:CBN-A, J5:DiP, J5:DiP-A, J5:OT, J5:OT-A                                                                                                                 |
| 840 | No          | 7       | 7-B  | 100    | exp   | Inf | unif   | wholeT_0.5  | J1:DiP, J1:DiP-A, J5:CBN, J5:CBN-A, J5:DiP, J5:DiP-A, J5:OT, J5:OT-A, S1:DiP, S1:DiP-A, S5:CBN, S5:CBN-A, S5:DiP, S5:DiP-A, S5:OT, S5:OT-A                         |
| 841 | No          | 7       | 7-B  | 100    | McF_4 | 0   | last   | singleC     | J1:DiP, J1:DiP-A, J1:OT, J1:OT-A, J5:DiP, J5:DiP-A, J5:OT, J5:OT-A, S1:DiP, S1:DiP-A, S5:DiP, S5:DiP-A, S5:OT, S5:OT-A                                             |
| 842 | No          | 7       | 7-B  | 100    | McF_4 | 0   | last   | wholeT_0.01 | J1:DiP, J1:DiP-A, J5:DiP, J5:DiP-A, J5:OT, J5:OT-A, S1:DiP, S5:DiP, S5:DiP-A, S5:OT, S5:OT-A                                                                       |
| 843 | No          | 7       | 7-B  | 100    | McF_4 | 0   | last   | wholeT_0.5  | J1:DiP, J1:DiP-A, J1:OT-A, J5:DiP, J5:DiP-A, J5:OT, J5:OT-A, S1:DiP, S1:DiP-A, S5:DiP, S5:DiP-A, S5:OT, S5:OT-A                                                    |
| 844 | No          | 7       | 7-B  | 100    | McF_4 | 0   | unif   | singleC     | J1:CBN-A, J1:DiP, J1:DiP-A, J5:CBN, J5:CBN-A, J5:DiP, J5:DiP-A, J5:OT, J5:OT-A, S1:DiP, S1:DiP-A, S5:CBN, S5:CBN-A, S5:DiP, S5:DiP-A                               |
| 845 | No          | 7       | 7-B  | 100    | McF_4 | 0   | unif   | wholeT_0.01 | J1:CBN, J1:CBN-A, J1:DiP, J1:DiP-A, J1:OT, J1:OT-A, J5:CBN, J5:CBN-A, J5:DiP, J5:DiP-A, J5:OT, J5:OT-A, S1:DiP, S1:DiP-A, S5:CBN, S5:DiP, S5:DiP-A, S5:OT, S5:OT-A |
| 846 | No          | 7       | 7-B  | 100    | McF_4 | 0   | unif   | wholeT_0.5  | J1:CBN, J1:CBN-A, J1:DiP, J1:DiP-A, J5:CBN, J5:CBN-A, J5:DiP, J5:DiP-A, J5:OT, J5:OT-A, S1:DiP, S1:DiP-A, S5:CBN-A, S5:DiP, S5:DiP-A, S5:OT-A                      |

Table 16: (continued)

|     | Conjunction | Drivers | Tree | S.Size | Model | sh  | S.Time | S.Type      | Best method(s)                                                                                                                                                               |
|-----|-------------|---------|------|--------|-------|-----|--------|-------------|------------------------------------------------------------------------------------------------------------------------------------------------------------------------------|
| 847 | No          | 7       | 7-B  | 100    | McF_4 | Inf | last   | singleC     | J1:DiP, J1:DiP-A, J1:OT, J1:OT-A, J5:DiP, J5:DiP-A, J5:OT, J5:OT-A, S1:DiP, S1:DiP-A, S5:DiP, S5:DiP-A, S5:OT, S5:OT-A                                                       |
| 848 | No          | 7       | 7-B  | 100    | McF_4 | Inf | last   | wholeT_0.01 | J1:DiP-A, J5:DiP, J5:DiP-A, J5:OT, J5:OT-A, S1:DiP, S1:DiP-A, S5:DiP, S5:DiP-A, S5:OT, S5:OT-A                                                                               |
| 849 | No          | 7       | 7-B  | 100    | McF_4 | Inf | last   | wholeT_0.5  | J1:DiP, J1:DiP-A, J5:DiP, J5:DiP-A, J5:OT, J5:OT-A, S1:DiP, S1:DiP-A, S5:DiP, S5:DiP-A, S5:OT, S5:OT-A                                                                       |
| 850 | No          | 7       | 7-B  | 100    | McF_4 | Inf | unif   | singleC     | J1:CBN, J1:CBN-A, J1:DiP, J1:DiP-A, J1:OT, J1:OT-A, J5:CBN, J5:CBN-A, J5:DiP, J5:DiP-A, J5:OT, J5:OT-A, S1:DiP, S1:DiP-A, S5:CBN, S5:CBN-A, S5:DiP, S5:DiP-A, S5:OT, S5:OT-A |
| 851 | No          | 7       | 7-B  | 100    | McF_4 | Inf | unif   | wholeT_0.01 | J1:CBN, J1:CBN-A, J1:DiP, J1:DiP-A, J5:CBN, J5:CBN-A, J5:DiP, J5:DiP-A, J5:OT, J5:OT-A, S1:DiP, S1:DiP-A, S5:CBN-A, S5:DiP, S5:DiP-A, S5:OT, S5:OT-A                         |
| 852 | No          | 7       | 7-B  | 100    | McF_4 | Inf | unif   | wholeT_0.5  | J1:CBN, J1:CBN-A, J1:DiP, J1:DiP-A, J5:CBN, J5:CBN-A, J5:DiP, J5:DiP-A, S1:DiP, S1:DiP-A, S5:CBN, S5:DiP, S5:DiP-A                                                           |
| 853 | No          | 7       | 7-B  | 100    | McF_6 | 0   | last   | singleC     | J1:DiP, J1:DiP-A, J5:DiP, J5:DiP-A, J5:OT, J5:OT-A, S1:DiP, S1:DiP-A, S5:DiP, S5:DiP-A, S5:OT, S5:OT-A                                                                       |
| 854 | No          | 7       | 7-B  | 100    | McF_6 | 0   | last   | wholeT_0.01 | J5:DiP, J5:OT, J5:OT-A, S5:DiP                                                                                                                                               |
| 855 | No          | 7       | 7-B  | 100    | McF_6 | 0   | last   | wholeT_0.5  | J1:DiP, J1:DiP-A, J5:DiP, J5:DiP-A, J5:OT, J5:OT-A, S1:DiP, S1:DiP-A, S5:DiP-A, S5:OT, S5:OT-A                                                                               |
| 856 | No          | 7       | 7-B  | 100    | McF_6 | 0   | unif   | singleC     | J1:CBN, J1:CBN-A, J1:DiP, J5:CBN, J5:CBN-A, J5:DiP, J5:DiP-A, S1:DiP, S5:CBN, S5:CBN-A, S5:DiP                                                                               |
| 857 | No          | 7       | 7-B  | 100    | McF_6 | 0   | unif   | wholeT_0.01 | J1:DiP, J1:DiP-A, J5:CBN, J5:CBN-A, J5:DiP, J5:DiP-A, S5:CBN, S5:CBN-A, S5:DiP, S5:DiP-A                                                                                     |
| 858 | No          | 7       | 7-B  | 100    | McF_6 | 0   | unif   | wholeT_0.5  | J1:CBN, J1:CBN-A, J5:CBN, J5:CBN-A, J5:DiP, J5:DiP-A, S5:CBN-A                                                                                                               |

Table 16: (continued)

|     | Conjunction | Drivers | Tree | S.Size | Model | sh  | S.Time | S.Type      | Best method(s)                                                                                         |
|-----|-------------|---------|------|--------|-------|-----|--------|-------------|--------------------------------------------------------------------------------------------------------|
| 859 | No          | 7       | 7-B  | 100    | McF_6 | Inf | last   | singleC     | J1:DiP, J1:DiP-A, J5:DiP, J5:DiP-A, J5:OT, J5:OT-A, S1:DiP, S1:DiP-A, S5:DiP, S5:DiP-A, S5:OT, S5:OT-A |
| 860 | No          | 7       | 7-B  | 100    | McF_6 | Inf | last   | wholeT_0.01 | J1:DiP, J5:DiP, J5:OT, J5:OT-A, S1:DiP, S5:DiP                                                         |
| 861 | No          | 7       | 7-B  | 100    | McF_6 | Inf | last   | wholeT_0.5  | J1:DiP-A, J5:DiP, J5:DiP-A, J5:OT, J5:OT-A, S1:DiP, S1:DiP-A, S5:DiP, S5:DiP-A, S5:OT, S5:OT-A         |
| 862 | No          | 7       | 7-B  | 100    | McF_6 | Inf | unif   | singleC     | J1:CBN, J1:CBN-A, J1:DiP, J5:CBN, J5:CBN-A, J5:DiP, J5:DiP-A, S5:CBN, S5:CBN-A, S5:DiP                 |
| 863 | No          | 7       | 7-B  | 100    | McF_6 | Inf | unif   | wholeT_0.01 | J1:DiP, J5:CBN, J5:CBN-A, J5:DiP, J5:DiP-A, S5:CBN, S5:CBN-A, S5:DiP, S5:DiP-A                         |
| 864 | No          | 7       | 7-B  | 100    | McF_6 | Inf | unif   | wholeT_0.5  | J1:CBN, J1:CBN-A, J1:DiP, J5:CBN, J5:CBN-A, J5:DiP, S5:CBN, S5:CBN-A                                   |
