# Supplementary material for: Identifying restrictions in the order of accumulation of mutations during tumor progression: effects of passengers, evolutionary models, and sampling
Source: PubMed Central journal article supplement (PMC4339747; doi:10.1186/s12859-015-0466-7), 2015-02-12
Supplement: 12859_2015_466_MOESM6_ESM.pdf [file 12859_2015_466_MOESM6_ESM.pdf]

# Additional file 6. Colored tables of median performance for all combinations of factors.

Supplementary material for “Identifying Restrictions in the Order of Accumulation of Mutations during Tumor Progression: Effects of Passengers, Evolutionary Models, and Sampling”

Ramon Diaz-Uriarte

Dept. Biochemistry, Universidad Autónoma de Madrid

Instituto de Investigaciones Biomédicas “Alberto Sols” (UAM-CSIC)

Madrid, Spain

ramon.diaz@iib.uam.es

rdiaz02@gmail.com

<http://ligarto.org/rdiaz>

## Contents

|          |                                           |           |
|----------|-------------------------------------------|-----------|
| <b>1</b> | <b>Introduction</b>                       | <b>3</b>  |
| <b>2</b> | <b>Drivers Known</b>                      | <b>4</b>  |
| 2.1      | Inferred edges, Drivers Known . . . . .   | 4         |
| 2.2      | Diff, Drivers Known . . . . .             | 8         |
| 2.3      | PFD, Drivers Known . . . . .              | 12        |
| 2.4      | PND, Drivers Known . . . . .              | 16        |
| 2.5      | FPF, Drivers Known . . . . .              | 20        |
| <b>3</b> | <b>Drivers Unknown</b>                    | <b>24</b> |
| 3.1      | Inferred edges, Drivers Unknown . . . . . | 24        |
| 3.2      | Diff, Drivers Unknown . . . . .           | 31        |
| 3.3      | PFD, Drivers Unknown . . . . .            | 38        |
| 3.4      | PND, Drivers Unknown . . . . .            | 45        |
| 3.5      | FPF, Drivers Unknown . . . . .            | 52        |

## List of Figures

|    |                                                                                                    |    |
|----|----------------------------------------------------------------------------------------------------|----|
| 1  | Drivers Known, number of inferred edges (not counting those from Root), N = 1000                   | 5  |
| 2  | Drivers Known, number of inferred edges (not counting those from Root), N = 200                    | 6  |
| 3  | Drivers Known, number of inferred edges (not counting those from Root), N = 100                    | 7  |
| 4  | Drivers Known, Diff, N = 1000                                                                      | 9  |
| 5  | Drivers Known, Diff, N = 200                                                                       | 10 |
| 6  | Drivers Known, Diff, N = 100                                                                       | 11 |
| 7  | Drivers Known, PFD, N = 1000                                                                       | 13 |
| 8  | Drivers Known, PFD, N = 200                                                                        | 14 |
| 9  | Drivers Known, PFD, N = 100                                                                        | 15 |
| 10 | Drivers Known, PND, N = 1000                                                                       | 17 |
| 11 | Drivers Known, PND, N = 200                                                                        | 18 |
| 12 | Drivers Known, PND, N = 100                                                                        | 19 |
| 13 | Drivers Known, FPF, N = 1000                                                                       | 21 |
| 14 | Drivers Known, FPF, N = 200                                                                        | 22 |
| 15 | Drivers Known, FPF, N = 100                                                                        | 23 |
| 16 | Drivers Unknown, number of inferred edges (not counting those from Root), N = 1000, S.Time = last  | 25 |
| 17 | Drivers Unknown, number of inferred edges (not counting those from Root), N = 1000, S.Time = unif. | 26 |
| 18 | Drivers Unknown, number of inferred edges (not counting those from Root), N = 200, S.Time = last   | 27 |
| 19 | Drivers Unknown, number of inferred edges (not counting those from Root), N = 200, S.Time = unif.  | 28 |
| 20 | Drivers Unknown, number of inferred edges (not counting those from Root), N = 100, S.Time = last   | 29 |
| 21 | Drivers Unknown, number of inferred edges (not counting those from Root), N = 100, S.Time = unif.  | 30 |
| 22 | Drivers Unknown, Diff, N = 1000, S.Time = last                                                     | 32 |
| 23 | Drivers Unknown, Diff, N = 1000, S.Time = unif.                                                    | 33 |
| 24 | Drivers Unknown, Diff, N = 200, S.Time = last                                                      | 34 |
| 25 | Drivers Unknown, Diff, N = 200, S.Time = unif.                                                     | 35 |
| 26 | Drivers Unknown, Diff, N = 100, S.Time = last                                                      | 36 |
| 27 | Drivers Unknown, Diff, N = 100, S.Time = unif.                                                     | 37 |
| 28 | Drivers Unknown, PFD, N = 1000, S.Time = last                                                      | 39 |
| 29 | Drivers Unknown, PFD, N = 1000, S.Time = unif.                                                     | 40 |
| 30 | Drivers Unknown, PFD, N = 200, S.Time = last                                                       | 41 |
| 31 | Drivers Unknown, PFD, N = 200, S.Time = unif.                                                      | 42 |
| 32 | Drivers Unknown, PFD, N = 100, S.Time = last                                                       | 43 |
| 33 | Drivers Unknown, PFD, N = 100, S.Time = unif.                                                      | 44 |
| 34 | Drivers Unknown, PND, N = 1000, S.Time = last                                                      | 46 |
| 35 | Drivers Unknown, PND, N = 1000, S.Time = unif.                                                     | 47 |
| 36 | Drivers Unknown, PND, N = 200, S.Time = last                                                       | 48 |
| 37 | Drivers Unknown, PND, N = 200, S.Time = unif.                                                      | 49 |
| 38 | Drivers Unknown, PND, N = 100, S.Time = last                                                       | 50 |
| 39 | Drivers Unknown, PND, N = 100, S.Time = unif.                                                      | 51 |
| 40 | Drivers Unknown, FPF, N = 1000, S.Time = last                                                      | 53 |
| 41 | Drivers Unknown, FPF, N = 1000, S.Time = unif.                                                     | 54 |
| 42 | Drivers Unknown, FPF, N = 200, S.Time = last                                                       | 55 |
| 43 | Drivers Unknown, FPF, N = 200, S.Time = unif.                                                      | 56 |
| 44 | Drivers Unknown, FPF, N = 100, S.Time = last                                                       | 57 |
| 45 | Drivers Unknown, FPF, N = 100, S.Time = unif.                                                      | 58 |

# 1 Introduction

The following tables (figures, actually) show, for all performance measure., as well as for the number of edges in the transitive closure of the relations (i.e., the # of relations in  $F$  for performance measure PFD), the median values for all combinations of factors. Each cell is the median of 20 replicates.

For all figures, lighter colors denote smaller values, and color intensity is normalized by row (i.e., there will be at least one cell that is white and one cell that is dark red in each row). Grey cells denote missing values: i.e., all 20 values for that cell were missing. Missing values can only occur in PFD (since, even if there are no fits, the rest of the performance measures are defined).

For performance measures (Diff, PFD, PND, FPF), therefore, lighter colors denote better performance. For “Inferred edges”, lighter colors highlight those cases with few discoveries.

The figures for the Drivers Unknown had to be split into two, for readability: the first half is with S.Time = last and the second with S.Time = unif (this is shown in the figure). Please note that the color intensity is normalized by row **over the two figures**.

## 2 Drivers Known

### 2.1 Inferred edges, Drivers Known



Inferred edges; N = 200

|                    |      |      |      |      |      |      |      |      |      |      |      |      |     |     |     |     |      |     |      |      |      |     |      |      |    |      |     |      |      |      |     |      |     |      |      |      |   |
|--------------------|------|------|------|------|------|------|------|------|------|------|------|------|-----|-----|-----|-----|------|-----|------|------|------|-----|------|------|----|------|-----|------|------|------|-----|------|-----|------|------|------|---|
| 11_B : McF_6 : Inf | 25   | 21.5 | 30   | 20   | 19.5 | 21   | 22.5 | 17   | 19   | 18.5 | 19.5 | 17   | 1   | 2   | 1   | 6.5 | 4    | 4   | 10.5 | 10   | 9    | 8.5 | 6    | 6.5  | 15 | 15   | 15  | 17   | 16   | 17   | 20  | 20   | 20  | 17   | 16   | 17   |   |
| 11_B : McF_6 : 0   | 30.5 | 19.5 | 27   | 21   | 21.5 | 22   | 22   | 16.5 | 22.5 | 18.5 | 22   | 21   | 5   | 5.5 | 4   | 6   | 11   | 6.5 | 12   | 16.5 | 12.5 | 9.5 | 11.5 | 10.5 | 15 | 15   | 15  | 16   | 16   | 16   | 20  | 20   | 20  | 16   | 16   | 16   |   |
| 11_B : McF_4 : Inf | 30.5 | 28.5 | 33.5 | 31   | 28.5 | 29   | 27   | 19.5 | 29.5 | 28.5 | 30   | 27.5 | 1   | 1   | 0   | 0   | 0    | 0   | 2    | 2    | 0    | 0   | 0    | 0    | 12 | 15   | 12  | 12   | 12   | 10.5 | 12  | 15   | 12  | 12   | 12   | 10.5 |   |
| 11_B : McF_4 : 0   | 31   | 29   | 34   | 31   | 26.5 | 33.5 | 26.5 | 29   | 29   | 33   | 28   | 31.5 | 3   | 8   | 3   | 1.5 | 5    | 1   | 5    | 9.5  | 4    | 1.5 | 5    | 1    | 15 | 15   | 14  | 10   | 12.5 | 11   | 15  | 15   | 14  | 10   | 12.5 | 11   |   |
| 11_B : exp : Inf   | 29.5 | 27   | 27   | 35   | 31.5 | 37.5 | 29.5 | 28.5 | 28   | 40.5 | 35   | 38   | 0   | 3   | 0   | 0   | 2    | 0   | 0    | 4.5  | 0    | 0   | 2    | 0    | 12 | 14   | 11  | 5    | 12   | 5.5  | 12  | 14   | 11  | 5    | 12   | 5.5  |   |
| 11_B : exp : 0     | 37   | 36   | 41.5 | 41.5 | 40   | 39.5 | 35   | 36.5 | 36.5 | 37.5 | 41   | 42.5 | 0   | 1   | 0   | 0   | 0    | 0   | 0.5  | 0    | 0    | 0   | 0    | 4    | 5  | 3.5  | 1   | 3    | 0.5  | 4    | 5   | 3.5  | 1   | 3    | 0.5  |      |   |
| 11_B : Bozic : Inf | 27.5 | 26.5 | 33.5 | 33.5 | 34.5 | 34   | 24.5 | 26   | 21.5 | 30.5 | 31.5 | 36   | 0   | 3   | 0.5 | 0.5 | 2    | 0.5 | 1    | 3.5  | 1    | 0.5 | 2    | 1    | 13 | 15   | 12  | 9    | 13   | 6    | 13  | 15   | 12  | 9    | 13   | 6    |   |
| 11_B : Bozic : 0   | 35   | 34   | 31.5 | 34.5 | 35.5 | 42   | 38   | 30   | 35   | 37.5 | 38.5 | 37   | 0   | 1   | 0   | 0   | 4    | 0   | 0    | 2    | 0    | 0   | 4    | 0    | 6  | 12.5 | 7   | 3    | 7    | 2    | 6   | 12.5 | 7   | 3    | 7    | 2    |   |
| 11_A : McF_6 : Inf | 24   | 21.5 | 27.5 | 18.5 | 20.5 | 20   | 18.5 | 16.5 | 20.5 | 19.5 | 20.5 | 19.5 | 0   | 0.5 | 0   | 5   | 3    | 4.5 | 6.5  | 6    | 6    | 7   | 5    | 5.5  | 15 | 15   | 15  | 16.5 | 16   | 16.5 | 20  | 20   | 20  | 16.5 | 16   | 16.5 |   |
| 11_A : McF_6 : 0   | 25.5 | 22.5 | 26   | 19.5 | 21.5 | 24.5 | 23   | 17   | 24.5 | 20.5 | 20   | 24.5 | 3   | 6   | 2   | 5.5 | 10.5 | 5.5 | 10   | 17.5 | 8.5  | 7   | 11.5 | 8    | 15 | 15   | 15  | 16   | 16   | 15   | 20  | 20   | 20  | 16   | 16   | 15   |   |
| 11_A : McF_4 : Inf | 31   | 28.5 | 31   | 30   | 30   | 32   | 34   | 24   | 28   | 27.5 | 32.5 | 31   | 0   | 1   | 0   | 0   | 0    | 0   | 1    | 3    | 1    | 0   | 0    | 0    | 10 | 12   | 10  | 10   | 10   | 12   | 10  | 10   | 10  | 10   | 10   | 10   |   |
| 11_A : McF_4 : 0   | 33.5 | 30   | 34.5 | 30   | 32.5 | 31   | 27.5 | 28   | 28.5 | 32   | 31.5 | 30   | 2   | 6.5 | 2   | 1.5 | 4    | 2   | 3.5  | 8    | 3    | 1.5 | 4.5  | 2    | 12 | 15   | 12  | 9.5  | 11   | 9.5  | 12  | 15   | 12  | 9.5  | 11   | 9.5  |   |
| 11_A : exp : Inf   | 31   | 29   | 28.5 | 35   | 32   | 33.5 | 29.5 | 28.5 | 33   | 37.5 | 34   | 37   | 0   | 2.5 | 0   | 0   | 2    | 0   | 0    | 5    | 0    | 0   | 2    | 0    | 10 | 13   | 10  | 4.5  | 11   | 5    | 10  | 13   | 10  | 4.5  | 11   | 5    |   |
| 11_A : exp : 0     | 35.5 | 35   | 33.5 | 41.5 | 41   | 39.5 | 37   | 35.5 | 39   | 44.5 | 38   | 43   | 0   | 0   | 0   | 0   | 0    | 0   | 0    | 1    | 0    | 0   | 0    | 4    | 5  | 4    | 1   | 4    | 0    | 4    | 5   | 4    | 1   | 4    | 0    |      |   |
| 11_A : Bozic : Inf | 28   | 25.5 | 26   | 35   | 32.5 | 34   | 31   | 22   | 30   | 33   | 32.5 | 29   | 0.5 | 2.5 | 1   | 0   | 2    | 0   | 0    | 5    | 1    | 0   | 2    | 0    | 11 | 14   | 12  | 7.5  | 12   | 8.5  | 11  | 14   | 12  | 7.5  | 12   | 8.5  |   |
| 11_A : Bozic : 0   | 34.5 | 31.5 | 27   | 35.5 | 41.5 | 36   | 33   | 29   | 31   | 35   | 40.5 | 40   | 0   | 1   | 0   | 0   | 3.5  | 0   | 0    | 1.5  | 0    | 0   | 4    | 0    | 6  | 12   | 6   | 3    | 8    | 2    | 6   | 12   | 6   | 3    | 8    | 2    |   |
| 9_B : McF_6 : Inf  | 13.5 | 13   | 13.5 | 11   | 11   | 10   | 7    | 12   | 8    | 11.5 | 10.5 | 10   | 1   | 1   | 1   | 0.5 | 1    | 1   | 7    | 8    | 7    | 1.5 | 2    | 2    | 5  | 5    | 5   | 9    | 9    | 9    | 13  | 13   | 13  | 9    | 9    | 9    |   |
| 9_B : McF_6 : 0    | 14.5 | 13.5 | 15.5 | 10.5 | 11.5 | 11   | 7    | 12   | 7.5  | 11.5 | 11   | 10.5 | 2.5 | 3   | 1   | 2   | 7    | 2   | 8    | 9    | 8    | 3   | 7    | 3    | 6  | 5    | 5   | 9    | 9    | 9    | 13  | 13   | 13  | 9    | 9    | 9    |   |
| 9_B : McF_4 : Inf  | 18.5 | 15.5 | 19   | 18   | 18   | 15   | 17   | 12.5 | 18.5 | 18.5 | 18   | 16.5 | 1   | 1   | 0   | 0   | 0    | 1   | 2    | 1    | 2    | 1   | 0    | 0    | 9  | 9    | 9   | 7    | 9    | 7    | 9   | 9    | 9   | 7    | 9    | 7    |   |
| 9_B : McF_4 : 0    | 18   | 14.5 | 20   | 17.5 | 18   | 20.5 | 15   | 12   | 15   | 17   | 15.5 | 16.5 | 2.5 | 7   | 3   | 1   | 3    | 1   | 3    | 7    | 2.5  | 1   | 3    | 1    | 9  | 9    | 9   | 7    | 9    | 7    | 9   | 9    | 9   | 7    | 9    | 7    |   |
| 9_B : exp : Inf    | 18.5 | 15   | 18.5 | 19.5 | 18.5 | 22   | 18   | 14   | 18   | 24   | 20.5 | 20   | 0   | 1   | 0   | 0   | 1    | 0   | 0    | 1    | 0    | 0   | 1.5  | 0    | 9  | 11   | 7   | 3.5  | 6    | 3    | 9   | 11   | 7   | 3.5  | 6    | 3    |   |
| 9_B : exp : 0      | 20.5 | 20   | 22.5 | 25   | 25   | 25.5 | 22.5 | 18.5 | 21   | 25   | 21   | 23.5 | 0   | 0   | 0   | 0   | 0    | 0   | 0    | 0    | 0    | 0   | 0    | 2    | 4  | 2    | 0.5 | 2    | 0    | 2    | 4   | 2    | 0.5 | 2    | 0    |      |   |
| 9_B : Bozic : Inf  | 19   | 16   | 15   | 18   | 16   | 18.5 | 14.5 | 13   | 14   | 19   | 17.5 | 21   | 0   | 1.5 | 0   | 0   | 3    | 0   | 0    | 3    | 0    | 0   | 3    | 0    | 9  | 11   | 9   | 5    | 9    | 4.5  | 9   | 11   | 9   | 5    | 9    | 4.5  |   |
| 9_B : Bozic : 0    | 19   | 15.5 | 21   | 24   | 22.5 | 21   | 19   | 17   | 18   | 19.5 | 22.5 | 26.5 | 0   | 1   | 0   | 0   | 1    | 0   | 0    | 1    | 0    | 0   | 2    | 0    | 5  | 7    | 4   | 2    | 4.5  | 1    | 5   | 7    | 4   | 2    | 5    | 1    |   |
| 9_A : McF_6 : Inf  | 13.5 | 13   | 13.5 | 15   | 15   | 14   | 11.5 | 9    | 10.5 | 15   | 15.5 | 13.5 | 0   | 0   | 0   | 1   | 1    | 1   | 4    | 11   | 4    | 2   | 2    | 2    | 7  | 7    | 5   | 7    | 7    | 15   | 15  | 12   | 7   | 7    | 7    |      |   |
| 9_A : McF_6 : 0    | 11   | 11.5 | 14.5 | 14   | 15   | 14   | 9    | 9.5  | 9    | 16.5 | 17   | 16   | 1   | 2   | 1   | 2.5 | 5    | 2   | 6.5  | 12.5 | 5    | 3   | 5    | 3    | 7  | 7    | 7   | 7    | 8    | 9    | 7   | 15   | 15  | 15   | 8    | 9    | 7 |
| 9_A : McF_4 : Inf  | 18.5 | 19   | 17.5 | 19.5 | 16   | 20   | 19   | 15.5 | 16.5 | 20.5 | 18   | 17   | 1   | 0   | 0   | 0   | 0    | 0   | 2    | 1    | 0    | 0   | 0    | 5    | 7  | 7    | 5   | 5    | 5    | 5    | 12  | 5    | 5   | 5    | 5    | 5    |   |
| 9_A : McF_4 : 0    | 17   | 18   | 16.5 | 21.5 | 19.5 | 18.5 | 16.5 | 16   | 20   | 18.5 | 18.5 | 15.5 | 1.5 | 4   | 1   | 0   | 1    | 0   | 2    | 5    | 1.5  | 0.5 | 1    | 0    | 6  | 9    | 7   | 5    | 6    | 6    | 9   | 7    | 5   | 7    | 6    |      |   |
| 9_A : exp : Inf    | 21   | 19.5 | 20   | 19   | 21.5 | 22   | 19   | 16.5 | 18.5 | 21   | 18   | 23   | 0   | 0   | 0   | 0   | 0    | 0   | 0    | 0    | 0    | 0   | 1    | 0    | 5  | 6    | 5   | 2    | 4    | 2    | 5   | 6    | 5   | 2    | 4    | 2    |   |
| 9_A : exp : 0      | 20   | 21.5 | 23   | 22.5 | 22   | 25.5 | 21   | 22.5 | 23   | 25   | 23   | 27   | 0   | 0   | 0   | 0   | 0    | 0   | 0    | 0    | 0    | 0   | 0    | 2    | 2  | 2    | 2   | 0    | 2    | 0    | 2   | 2    | 0   | 2    | 0    |      |   |
| 9_A : Bozic : Inf  | 18.5 | 15.5 | 19   | 17.5 | 20   | 18.5 | 16.5 | 17.5 | 17   | 19.5 | 17.5 | 21.5 | 0   | 0   | 0   | 0   | 1    | 0   | 0    | 1    | 0    | 0   | 1    | 0    | 5  | 8    | 5   | 3    | 6    | 3    | 5   | 8    | 5   | 3    | 6    | 3    |   |
| 9_A : Bozic : 0    | 23   | 21   | 24   | 23   | 23.5 | 22.5 | 19   | 19.5 | 21   | 24.5 | 19.5 | 24   | 0   | 0   | 0   | 0   | 1    | 0   | 0    | 0    | 0    | 0   | 1    | 0    | 3  | 5.5  | 2.5 | 1    | 2    | 1    | 3   | 5.5  | 2.5 | 1    | 2.5  | 1    |   |
| 7_B : McF_6 : Inf  | 6    | 8.5  | 5    | 3    | 4    | 3    | 7    | 8    | 6.5  | 6    | 6.5  | 0    | 0   | 0   | 0   | 1   | 1    | 1   | 3    | 9    | 3    | 2   | 1    | 1    | 2  | 2    | 2   | 2    | 8    | 8    | 8   | 8    | 8   | 8    | 9    | 8.5  |   |
| 7_B : McF_6 : 0    | 5.5  | 6.5  | 5.5  | 4.5  | 3.5  | 4.5  | 6    | 7.5  | 6    | 7    | 5.5  | 7    | 0   | 1   | 0   | 2   | 3    | 1   | 4    | 8    | 3    | 2   | 4.5  | 2    | 2  | 2    | 2   | 2    | 8    | 8    | 8   | 8    | 8   | 8    | 8    | 8    |   |
| 7_B : McF_4 : Inf  | 7.5  | 7    | 6    | 6    | 6.5  | 6    | 5    | 3    | 5    | 6.5  | 6.5  | 7    | 0   | 0   | 0   | 0   | 0    | 0   | 0    | 0    | 0    | 0   | 0    | 2    | 2  | 2    | 2   | 8    | 8    | 8    | 8   | 8    | 8   | 8    | 8    | 8    |   |
| 7_B : McF_4 : 0    | 7    | 6.5  | 7    | 7.5  | 7    | 8    | 6    | 3    | 6    | 9    | 7    | 9    | 1   | 2   | 1   | 1   | 1    | 0   | 1    | 2    | 1    | 2   | 4    | 1    | 2  | 2    | 2   | 8    | 8    | 8    | 8   | 8    | 8   | 8    | 8    | 8    |   |
| 7_B : exp : Inf    | 9.5  | 5    | 9    | 11.5 | 15   | 11   | 8    | 7    | 6.5  | 11   | 15   | 12   | 0   | 0   | 0   | 0   | 4    | 0   | 0    | 0.5  | 0    | 0   | 4    | 0    | 2  | 2    | 2   | 6.5  | 11.5 | 5    | 8   | 8    | 8   | 6.5  | 11.5 | 5    |   |
| 7_B : exp : 0      | 11   | 9    | 11   | 16.5 | 12   | 18   | 13.5 | 8    | 12.5 | 14   | 13.5 | 15   | 0   | 0   | 0   | 0   | 0    | 0   | 0    | 0    | 0    | 0   | 0    | 0    | 0  | 1    | 0   | 2    | 4    | 1.5  | 4   | 5    | 4   | 2    | 5    | 1.5  |   |
| 7_B : Bozic : Inf  | 7.5  | 4    | 7.5  | 10   | 15   | 10.5 | 4    | 6    | 5.5  | 10   | 15   | 11   | 0   | 1   | 0   | 0   | 6    | 1   | 0    | 2    | 0    | 0   | 0    | 6    | 1  | 2    | 2   | 2    | 9    | 14   | 8.5 | 8    | 8   | 9    | 14   | 8.5  |   |
| 7_B : Bozic : 0    | 10.5 | 8    | 12   | 12   | 11   | 14   | 7    | 5    | 10.5 | 13   | 12   | 13.5 | 0   | 0   | 0   | 0   | 4    | 0   | 0    | 0    | 0    | 0   | 4.5  | 0    | 1  | 1.5  | 1   | 3.5  | 8    | 3    | 6   | 7.5  | 6   | 3.5  | 8    | 3    |   |
| 7_A : McF_6 : Inf  | 11   | 9    | 10.5 | 7    | 8    | 8    | 11   | 8    | 13   | 10   | 11   | 11   | 0   | 0   | 0   | 0   | 0    | 0   | 4    | 9    | 4    | 0   | 0    | 2    | 2  | 2    | 2   | 8.5  | 8    | 10   | 7   | 7    | 7   | 8.5  | 8.5  | 10   |   |
| 7_A : McF_6 : 0    | 10   | 8    | 8.5  | 9    | 7    | 9    | 10.5 | 7    | 12   | 10   | 9    | 11   | 0   | 1   | 0   | 1   | 2    | 1   | 5    | 10   | 7    | 1   | 4    | 1    | 2  | 2    | 2   | 9    | 8    | 10   | 7   | 7    | 8   | 9    | 8    | 10   |   |
| 7_A : McF_4 : Inf  | 9    | 9    | 9.5  | 7.5  | 8    | 9.5  | 6    | 6.5  | 9    | 10   | 9.5  | 10   | 0   | 0   | 0   | 0   | 0    | 0   | 0    | 0    | 0    | 0   | 0    | 0    | 0  | 1    | 0   | 4    | 4    | 4    | 4   | 4    | 6   | 4    | 4    | 4    |   |
| 7_A : McF_4 : 0    | 7    | 8    | 7.5  | 10   | 7    | 10   | 6.5  | 5.5  | 5    | 11   | 8.5  | 12   | 0   | 0   | 0   | 0   | 0.5  | 0   | 0    | 0    | 0    | 0   | 1    | 3    | 1  | 1    | 2   | 1    | 4    | 6    | 4   | 6    | 8   | 6    | 4    | 6    | 4 |
| 7_A : exp : Inf    | 11   | 7    | 9.5  | 12.5 | 13.5 | 12   | 7.5  | 10.5 | 7    | 13   | 14.5 | 12.5 | 0   | 0   | 0   | 0   | 4    | 0   | 0    | 0    | 0    | 0   | 4    | 0    | 0  | 0    | 6   | 8    | 5.5  | 4    | 4   | 4    | 6   | 8    | 5.5  |      |   |
| 7_A : exp : 0      | 10   | 7.5  | 10.5 | 17   | 12.5 | 16   | 11   | 8    | 12   | 14   | 14   | 17   | 0   | 0   | 0   | 0   | 0    | 0   | 0    | 0    | 0    | 0   | 0    | 0    | 1  | 0    | 2   | 5.5  | 1    | 4    | 5   | 4    | 2   | 5.5  | 1    |      |   |
| 7_A : Bozic : Inf  | 8.5  | 8    | 8    | 12   | 14   | 12   | 8    | 11   | 6    | 11   | 15   | 11.5 | 0   | 0   | 0   | 1   | 4.5  | 1   | 0    | 0    | 0    | 0   | 1    | 4.5  | 1  | 1    | 1   | 7    | 9    | 7    | 6   |      |     |      |      |      |   |

Inferred edges; N = 100

|                    |      |      |      |      |      |      |      |      |      |      |      |      |     |     |   |     |     |     |     |     |     |     |     |     |     |      |     |     |      |     |     |      |      |     |      |     |     |     |   |
|--------------------|------|------|------|------|------|------|------|------|------|------|------|------|-----|-----|---|-----|-----|-----|-----|-----|-----|-----|-----|-----|-----|------|-----|-----|------|-----|-----|------|------|-----|------|-----|-----|-----|---|
| 11_B : McF_6 : Inf | 27   | 19   | 22   | 20.5 | 22   | 20   | 19   | 17   | 18   | 20.5 | 21   | 21.5 | 0   | 0   | 1 | 3   | 3   | 2   | 2   | 4.5 | 2   | 3   | 3   | 2   | 15  | 15   | 16  | 16  | 16   | 16  | 20  | 20.5 | 21   | 16  | 16   | 16  | 16  | 16  |   |
| 11_B : McF_6 : 0   | 22   | 22.5 | 22.5 | 23   | 23   | 24.5 | 20   | 16.5 | 16.5 | 20   | 18.5 | 22.5 | 1   | 4   | 1 | 1   | 7.5 | 4   | 3.5 | 6   | 2.5 | 1.5 | 8   | 4   | 16  | 15   | 15  | 16  | 16   | 16  | 17  | 21   | 20   | 20  | 16   | 16  | 17  |     |   |
| 11_B : McF_4 : Inf | 33   | 31   | 31   | 29.5 | 30.5 | 35   | 32   | 20.5 | 29.5 | 32.5 | 29.5 | 32   | 0   | 0   | 0 | 0   | 0   | 0   | 0   | 0   | 0   | 0   | 0   | 4   | 12  | 15   | 12  | 9.5 | 10   | 10  | 12  | 15   | 12   | 9.5 | 10   | 10  | 10  | 10  |   |
| 11_B : McF_4 : 0   | 29.5 | 26.5 | 33   | 35.5 | 33.5 | 32.5 | 25.5 | 24.5 | 28.5 | 30   | 29.5 | 26   | 1   | 4   | 1 | 0   | 2   | 0   | 1   | 5   | 1   | 1   | 2.5 | 0   | 12  | 15   | 12  | 8.5 | 11   | 8.5 | 12  | 15   | 12   | 8.5 | 11   | 8.5 | 11  | 8.5 |   |
| 11_B : exp : Inf   | 31   | 31   | 31   | 36.5 | 34.5 | 37   | 31.5 | 30.5 | 25   | 39   | 36   | 37   | 0   | 0.5 | 0 | 0   | 1   | 0   | 0   | 1   | 0   | 0   | 1   | 0   | 8   | 13   | 10  | 5   | 9    | 4.5 | 8   | 13   | 10   | 5   | 9    | 4.5 | 8   | 4.5 |   |
| 11_B : exp : 0     | 41.5 | 33   | 38.5 | 45   | 37   | 40.5 | 41   | 31.5 | 46   | 44   | 39   | 47.5 | 0   | 0   | 0 | 0   | 0   | 0   | 0   | 0   | 0   | 0   | 0   | 0   | 3   | 4.5  | 3   | 1   | 3    | 1   | 3   | 4.5  | 3    | 1   | 3    | 1   | 3   | 1   |   |
| 11_B : Bozic : Inf | 31   | 27   | 33.5 | 32.5 | 33.5 | 36   | 30   | 24.5 | 28.5 | 32   | 34.5 | 32   | 0   | 1   | 0 | 0   | 2   | 0   | 0   | 1.5 | 0   | 0   | 2   | 0   | 12  | 15   | 12  | 6   | 9.5  | 5.5 | 12  | 15   | 12   | 6   | 9.5  | 5.5 | 12  | 6   |   |
| 11_B : Bozic : 0   | 37.5 | 31.5 | 33.5 | 35.5 | 37   | 39.5 | 38.5 | 30.5 | 35   | 39   | 37.5 | 43.5 | 0   | 1   | 0 | 0   | 1.5 | 0   | 0   | 1   | 0   | 0   | 2   | 0   | 5   | 8.5  | 4   | 2   | 6.5  | 1   | 5   | 8.5  | 4    | 2   | 6.5  | 1   | 5   | 8.5 | 4 |
| 11_A : McF_6 : Inf | 26.5 | 22   | 26   | 21.5 | 24   | 21.5 | 22.5 | 18.5 | 26.5 | 23   | 19.5 | 19.5 | 0   | 0   | 1 | 1   | 2   | 1   | 2   | 3.5 | 2   | 1.5 | 3   | 1.5 | 16  | 15   | 16  | 15  | 15   | 16  | 21  | 21   | 21   | 15  | 15   | 16  | 16  |     |   |
| 11_A : McF_6 : 0   | 28   | 21   | 28   | 22.5 | 22.5 | 25   | 23.5 | 15.5 | 24   | 23.5 | 26.5 | 26   | 1   | 3   | 1 | 4   | 6   | 3.5 | 3   | 5.5 | 3   | 4   | 6   | 4   | 16  | 15   | 15  | 16  | 16   | 16  | 21  | 20   | 20.5 | 16  | 16   | 16  | 16  |     |   |
| 11_A : McF_4 : Inf | 29.5 | 30   | 32   | 34   | 30.5 | 32.5 | 28   | 23.5 | 28   | 29.5 | 30   | 36.5 | 0   | 0   | 0 | 0   | 0   | 0.5 | 0   | 0   | 0   | 0   | 0   | 4   | 11  | 12.5 | 10  | 8   | 9    | 9   | 11  | 13   | 10   | 8   | 9    | 9   | 9   | 9   |   |
| 11_A : McF_4 : 0   | 33   | 31.5 | 32.5 | 32.5 | 34.5 | 32   | 27   | 23   | 30   | 30   | 29.5 | 30   | 1   | 2   | 1 | 0   | 2   | 0.5 | 1   | 3   | 1   | 0   | 3   | 1   | 11  | 14.5 | 11  | 7.5 | 9.5  | 7   | 11  | 15   | 11   | 7.5 | 9.5  | 7   | 7   | 7   |   |
| 11_A : exp : Inf   | 34   | 30.5 | 33.5 | 40.5 | 33   | 35.5 | 32   | 30   | 33   | 38.5 | 34.5 | 34   | 0   | 1   | 0 | 0   | 1.5 | 0   | 0   | 1   | 0   | 0   | 1.5 | 0   | 8   | 11.5 | 6   | 4   | 8.5  | 4   | 8   | 11.5 | 6    | 4   | 8.5  | 4   | 8.5 | 4   |   |
| 11_A : exp : 0     | 35.5 | 37.5 | 39   | 43.5 | 39   | 43   | 40.5 | 33   | 37   | 46.5 | 40   | 45.5 | 0   | 0   | 0 | 0   | 0   | 0   | 0   | 0   | 0   | 0   | 0   | 0   | 3.5 | 4.5  | 3   | 0   | 3    | 0   | 3.5 | 4.5  | 3    | 0   | 3    | 0   | 3   | 0   |   |
| 11_A : Bozic : Inf | 28.5 | 26.5 | 31.5 | 33.5 | 37   | 39.5 | 33.5 | 25.5 | 30.5 | 36.5 | 31.5 | 37.5 | 0   | 1   | 0 | 0   | 2   | 0   | 0   | 1   | 0   | 0   | 2   | 0   | 10  | 12   | 10  | 5.5 | 9    | 5   | 10  | 12   | 10   | 5.5 | 9    | 5   | 10  | 5.5 | 9 |
| 11_A : Bozic : 0   | 35   | 32   | 34.5 | 41.5 | 37.5 | 43.5 | 34.5 | 29   | 35   | 40   | 43   | 40.5 | 0   | 1   | 0 | 0   | 1   | 0   | 0   | 1   | 0   | 0   | 1   | 0   | 5.5 | 8.5  | 5   | 2   | 5    | 1   | 5.5 | 8.5  | 5    | 2   | 5    | 1   | 5   | 1   |   |
| 9_B : McF_6 : Inf  | 12.5 | 12   | 13   | 13   | 11   | 11   | 6    | 10.5 | 7.5  | 12   | 11   | 13.5 | 0   | 0   | 0 | 0   | 0   | 0   | 0   | 0.5 | 0   | 0   | 0   | 0   | 5   | 5    | 5   | 9   | 9    | 9   | 13  | 13   | 13   | 9   | 9    | 9   | 9   |     |   |
| 9_B : McF_6 : 0    | 12   | 15   | 13   | 12.5 | 11   | 14   | 8    | 10   | 8    | 13   | 11   | 11.5 | 1   | 1.5 | 0 | 1   | 3.5 | 1   | 1   | 2.5 | 1   | 1   | 4   | 1   | 5   | 5    | 5   | 9   | 9    | 9   | 13  | 13   | 13   | 9   | 9    | 9   | 9   |     |   |
| 9_B : McF_4 : Inf  | 18   | 15.5 | 20   | 16   | 17.5 | 17   | 14.5 | 10   | 17   | 17   | 16   | 16   | 0   | 0   | 0 | 0   | 0   | 0   | 0   | 0   | 0   | 0   | 0   | 0   | 9   | 9    | 9   | 7   | 7    | 7   | 9   | 9    | 9    | 7   | 7    | 7   | 7   | 7   |   |
| 9_B : McF_4 : 0    | 20   | 15.5 | 17   | 18.5 | 17   | 17   | 15.5 | 12.5 | 16.5 | 17   | 18   | 17   | 0   | 3   | 0 | 0   | 1   | 0   | 0   | 3   | 0   | 0   | 1   | 0   | 9   | 9    | 9   | 6.5 | 7    | 5   | 9   | 9    | 9    | 6.5 | 7    | 5   | 9   |     |   |
| 9_B : exp : Inf    | 20.5 | 16   | 19   | 22   | 24.5 | 22   | 16   | 17   | 18   | 23   | 23.5 | 22.5 | 0   | 1   | 0 | 0   | 0.5 | 0   | 0   | 1   | 0   | 0   | 0.5 | 0   | 5   | 11   | 5   | 2.5 | 7    | 2   | 5   | 11   | 5    | 2.5 | 7    | 2   | 5   | 11  |   |
| 9_B : exp : 0      | 22.5 | 20.5 | 20   | 26.5 | 22   | 25   | 22   | 19   | 23   | 26   | 21.5 | 25.5 | 0   | 0   | 0 | 0   | 0   | 0   | 0   | 0   | 0   | 0   | 0   | 0   | 2   | 3    | 2   | 0   | 2    | 0   | 2   | 3    | 2    | 0   | 2    | 0   | 2   | 0   |   |
| 9_B : Bozic : Inf  | 17   | 17   | 19   | 19.5 | 20   | 21.5 | 17.5 | 15   | 15   | 22   | 16   | 18   | 0   | 0.5 | 0 | 0   | 2   | 0   | 0   | 1   | 0   | 0   | 2   | 0   | 9   | 11   | 8   | 3   | 6.5  | 4   | 9   | 11   | 8    | 3.5 | 6.5  | 4   | 9   | 11  |   |
| 9_B : Bozic : 0    | 24   | 19   | 21   | 23.5 | 20   | 24   | 21   | 17.5 | 23   | 23   | 21   | 24.5 | 0   | 1   | 0 | 0   | 0   | 0   | 0   | 1   | 0   | 0   | 1   | 0   | 3   | 5.5  | 3   | 1   | 4    | 0   | 3   | 5.5  | 3    | 1   | 4    | 0   | 3   | 5.5 |   |
| 9_A : McF_6 : Inf  | 12   | 11   | 14.5 | 14.5 | 14   | 16   | 11   | 11   | 11   | 15   | 17.5 | 15   | 0   | 0   | 0 | 0   | 0   | 0   | 0   | 3   | 0   | 0   | 0.5 | 0   | 5   | 7    | 5   | 7   | 7    | 7   | 12  | 15   | 12   | 7   | 7    | 7   | 7   | 7   |   |
| 9_A : McF_6 : 0    | 13   | 14   | 13   | 16   | 14.5 | 15   | 10.5 | 11   | 10.5 | 15   | 15.5 | 15   | 0   | 1   | 0 | 1   | 2.5 | 1   | 1   | 3   | 1   | 1   | 2.5 | 1   | 7   | 7    | 7   | 7   | 7    | 7   | 15  | 15   | 13   | 9   | 7.5  | 7   | 7   | 7   |   |
| 9_A : McF_4 : Inf  | 19   | 19.5 | 20.5 | 18.5 | 20   | 20   | 16.5 | 14   | 17.5 | 20.5 | 15.5 | 21.5 | 0   | 0   | 0 | 0   | 0   | 0   | 0   | 1   | 0   | 0   | 0   | 0   | 5   | 7    | 5   | 5   | 5    | 5   | 5   | 12   | 5    | 5   | 5    | 5   | 5   | 5   |   |
| 9_A : McF_4 : 0    | 19   | 19   | 18   | 18.5 | 19   | 17   | 18   | 18   | 17   | 17   | 20.5 | 18.5 | 0.5 | 2   | 0 | 0   | 1   | 0   | 0   | 1   | 3   | 0   | 0   | 1   | 6   | 8    | 6.5 | 5   | 5    | 5   | 6   | 8    | 6.5  | 5   | 5    | 5   | 5   | 5   |   |
| 9_A : exp : Inf    | 19.5 | 18.5 | 19.5 | 25   | 21.5 | 22   | 18   | 17.5 | 18.5 | 25   | 23   | 20   | 0   | 0   | 0 | 0   | 0   | 0   | 0   | 0.5 | 0   | 0   | 0   | 0   | 4   | 6    | 4.5 | 2   | 3.5  | 2   | 4   | 6    | 4.5  | 2   | 3.5  | 2   | 4   | 6   |   |
| 9_A : exp : 0      | 23.5 | 22   | 23.5 | 26   | 25   | 23.5 | 23.5 | 19   | 25   | 25.5 | 23.5 | 26   | 0   | 0   | 0 | 0   | 0   | 0   | 0   | 0   | 0   | 0   | 0   | 0   | 1   | 2    | 1   | 0   | 1    | 0   | 1   | 2    | 1    | 0   | 1    | 0   | 1   | 0   |   |
| 9_A : Bozic : Inf  | 17.5 | 17   | 19   | 23   | 21.5 | 23   | 17.5 | 18   | 17   | 21.5 | 23.5 | 19.5 | 0   | 0   | 0 | 0   | 0   | 0   | 0   | 0   | 0   | 0   | 0.5 | 0   | 5   | 6    | 5   | 2   | 4    | 2   | 5   | 6    | 5    | 2   | 4    | 2   | 5   | 6   |   |
| 9_A : Bozic : 0    | 20.5 | 19   | 22   | 23.5 | 20   | 24   | 25   | 20.5 | 25   | 23   | 24.5 | 23.5 | 0   | 0   | 0 | 0   | 0   | 0   | 0   | 0   | 0   | 0   | 0   | 0   | 2   | 5    | 2   | 1   | 3    | 0   | 2   | 5    | 2    | 1   | 3    | 0   | 2   | 5   |   |
| 7_B : McF_6 : Inf  | 7    | 7.5  | 7    | 5    | 3    | 4    | 7    | 7.5  | 6    | 6    | 6    | 6    | 0   | 0   | 0 | 0   | 0.5 | 0.5 | 0   | 3   | 0   | 0   | 1   | 2   | 2   | 2    | 2   | 8   | 8    | 8   | 8   | 8    | 8    | 8   | 8    | 8   | 8   | 8   |   |
| 7_B : McF_6 : 0    | 7.5  | 8    | 5    | 5.5  | 5    | 5    | 6.5  | 7    | 6    | 7    | 6    | 7    | 0   | 0   | 0 | 1   | 1.5 | 1   | 0   | 3   | 0   | 0   | 1   | 2   | 2   | 2    | 2   | 9   | 9    | 9   | 8   | 8    | 8    | 8   | 8    | 8   | 8   | 8   |   |
| 7_B : McF_4 : Inf  | 8    | 7    | 8    | 6    | 5.5  | 6    | 5.5  | 6.5  | 6    | 7.5  | 6.5  | 6.5  | 0   | 0   | 0 | 0   | 0   | 0   | 0   | 0   | 0   | 0   | 0   | 0   | 2   | 2    | 2   | 8   | 8    | 8   | 8   | 8    | 8    | 8   | 8    | 8   | 8   | 8   | 8 |
| 7_B : McF_4 : 0    | 7    | 7.5  | 7    | 7    | 6.5  | 7    | 5    | 4    | 5    | 9    | 8    | 9    | 0   | 1   | 0 | 0   | 0   | 0   | 0   | 1   | 0   | 0   | 1   | 0   | 2   | 2    | 2   | 8   | 8    | 8   | 8   | 8    | 8    | 8   | 8    | 8   | 8   | 8   | 8 |
| 7_B : exp : Inf    | 8.5  | 6    | 8    | 13   | 13   | 12.5 | 6.5  | 9    | 8    | 12.5 | 15   | 12   | 0   | 0   | 0 | 0   | 4   | 0   | 0   | 0   | 0   | 0   | 0   | 0   | 1   | 2.5  | 1   | 5   | 10.5 | 4   | 6   | 8.5  | 6    | 5   | 10.5 | 4   | 6   | 8.5 |   |
| 7_B : exp : 0      | 11.5 | 11   | 14.5 | 13   | 14   | 16   | 13.5 | 10   | 13   | 15   | 15   | 16.5 | 0   | 0   | 0 | 0   | 0   | 0   | 0   | 0   | 0   | 0   | 0   | 0   | 0   | 1    | 0   | 1   | 4    | 0.5 | 4   | 5    | 3    | 1   | 4    | 0.5 | 4   |     |   |
| 7_B : Bozic : Inf  | 8.5  | 4.5  | 8    | 11   | 16   | 12   | 5.5  | 8    | 5    | 11   | 15   | 11   | 0   | 1   | 0 | 0.5 | 4   | 0   | 0   | 3.5 | 0   | 0   | 1   | 2   | 2   | 3    | 2   | 7   | 13   | 8   | 8   | 8    | 8    | 7   | 13   | 8   | 8   |     |   |
| 7_B : Bozic : 0    | 10.5 | 8    | 10   | 12.5 | 12   | 14   | 9.5  | 6    | 11   | 13.5 | 12   | 15   | 0   | 0   | 0 | 0   | 2   | 0   | 0   | 0   | 0   | 0   | 0   | 1   | 1   | 1    | 0.5 | 3   | 8    | 2   | 6   | 6    | 4.5  | 3   | 8    | 2   | 6   |     |   |
| 7_A : McF_6 : Inf  | 10   | 10   | 9.5  | 9    | 8    | 8    | 11   | 8.5  | 12.5 | 10   | 10   | 10   | 0   | 0   | 0 | 0   | 0   | 0   | 0   | 2   | 0   | 0   | 0   | 0   | 2   | 2    | 2   | 10  | 6    | 8.5 | 7   | 7    | 7    | 7   | 10   | 10  | 10  |     |   |
| 7_A : McF_6 : 0    | 11   | 9.5  | 9.5  | 9    | 8    | 10   | 11   | 8    | 12   | 10   | 10   | 10   | 0   | 0   | 0 | 0   | 0.5 | 0   | 0   | 4   | 0   | 0   | 1   | 2   | 2   | 2    | 10  | 10  | 10   | 7   | 7   | 7    | 7    | 10  | 10   | 10  | 10  |     |   |
| 7_A : McF_4 : Inf  | 9    | 10.5 | 10   | 9    | 8.5  | 8    | 8.5  | 7    | 9    | 9    | 10   | 9.5  | 0   | 0   | 0 | 0   | 0   | 0   | 0   | 0   | 0   | 0   | 0   | 0   | 0   | 1    | 0   | 4   | 4    | 4   | 4   | 4    | 6    | 4   | 4    | 4   | 4   | 4   |   |
| 7_A : McF_4 : 0    | 8    | 8    | 9    | 8    | 8    | 9    | 7    | 6    | 6    | 11   | 7    | 12.5 | 0   | 0   | 0 | 0   | 0   | 0   | 0   | 0   | 0   | 0   | 0   | 1   | 2   | 0    | 4   | 5   | 4    | 6   | 8   | 5    | 4    | 5   | 4    | 5   | 4   |     |   |
| 7_A : exp : Inf    | 9.5  | 7.5  | 10.5 | 13   | 13   | 12.5 | 8.5  | 11   | 7    | 13   | 14   | 12   | 0   | 0   | 0 | 0   | 4   | 0   | 0   | 0   | 0   | 0   | 0   | 0   | 0   | 1    | 0   | 4   | 8    | 5   | 4   | 5    | 4    | 4   | 8    | 5   | 4   |     |   |
| 7_A : exp : 0      |      |      |      |      |      |      |      |      |      |      |      |      |     |     |   |     |     |     |     |     |     |     |     |     |     |      |     |     |      |     |     |      |      |     |      |     |     |     |   |

**2.2 Diff, Drivers Known**



Diff; N = 1000

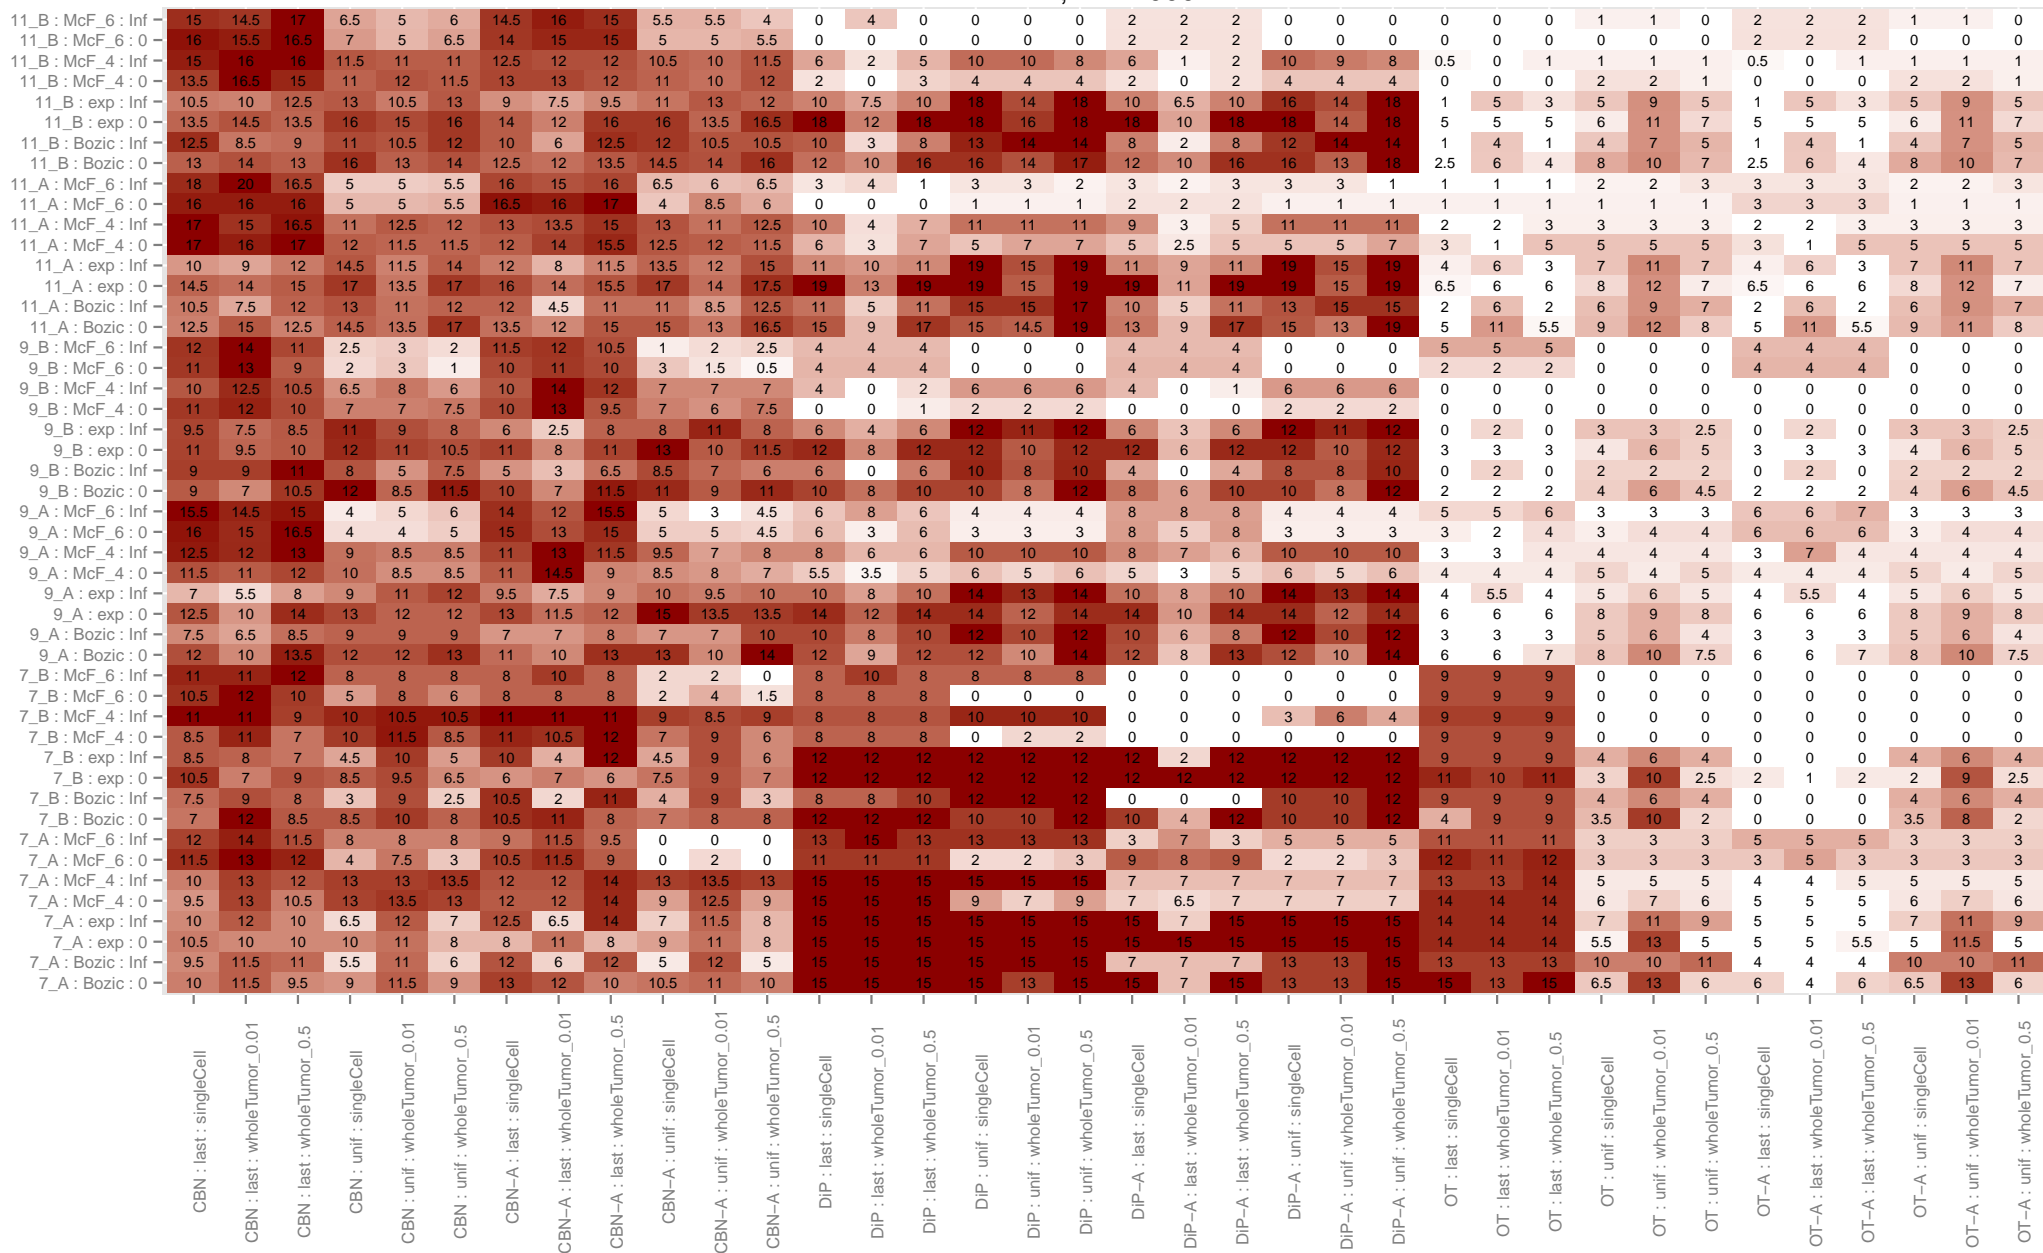

Figure 4: Drivers Known, Diff, N = 1000

Diff; N = 200

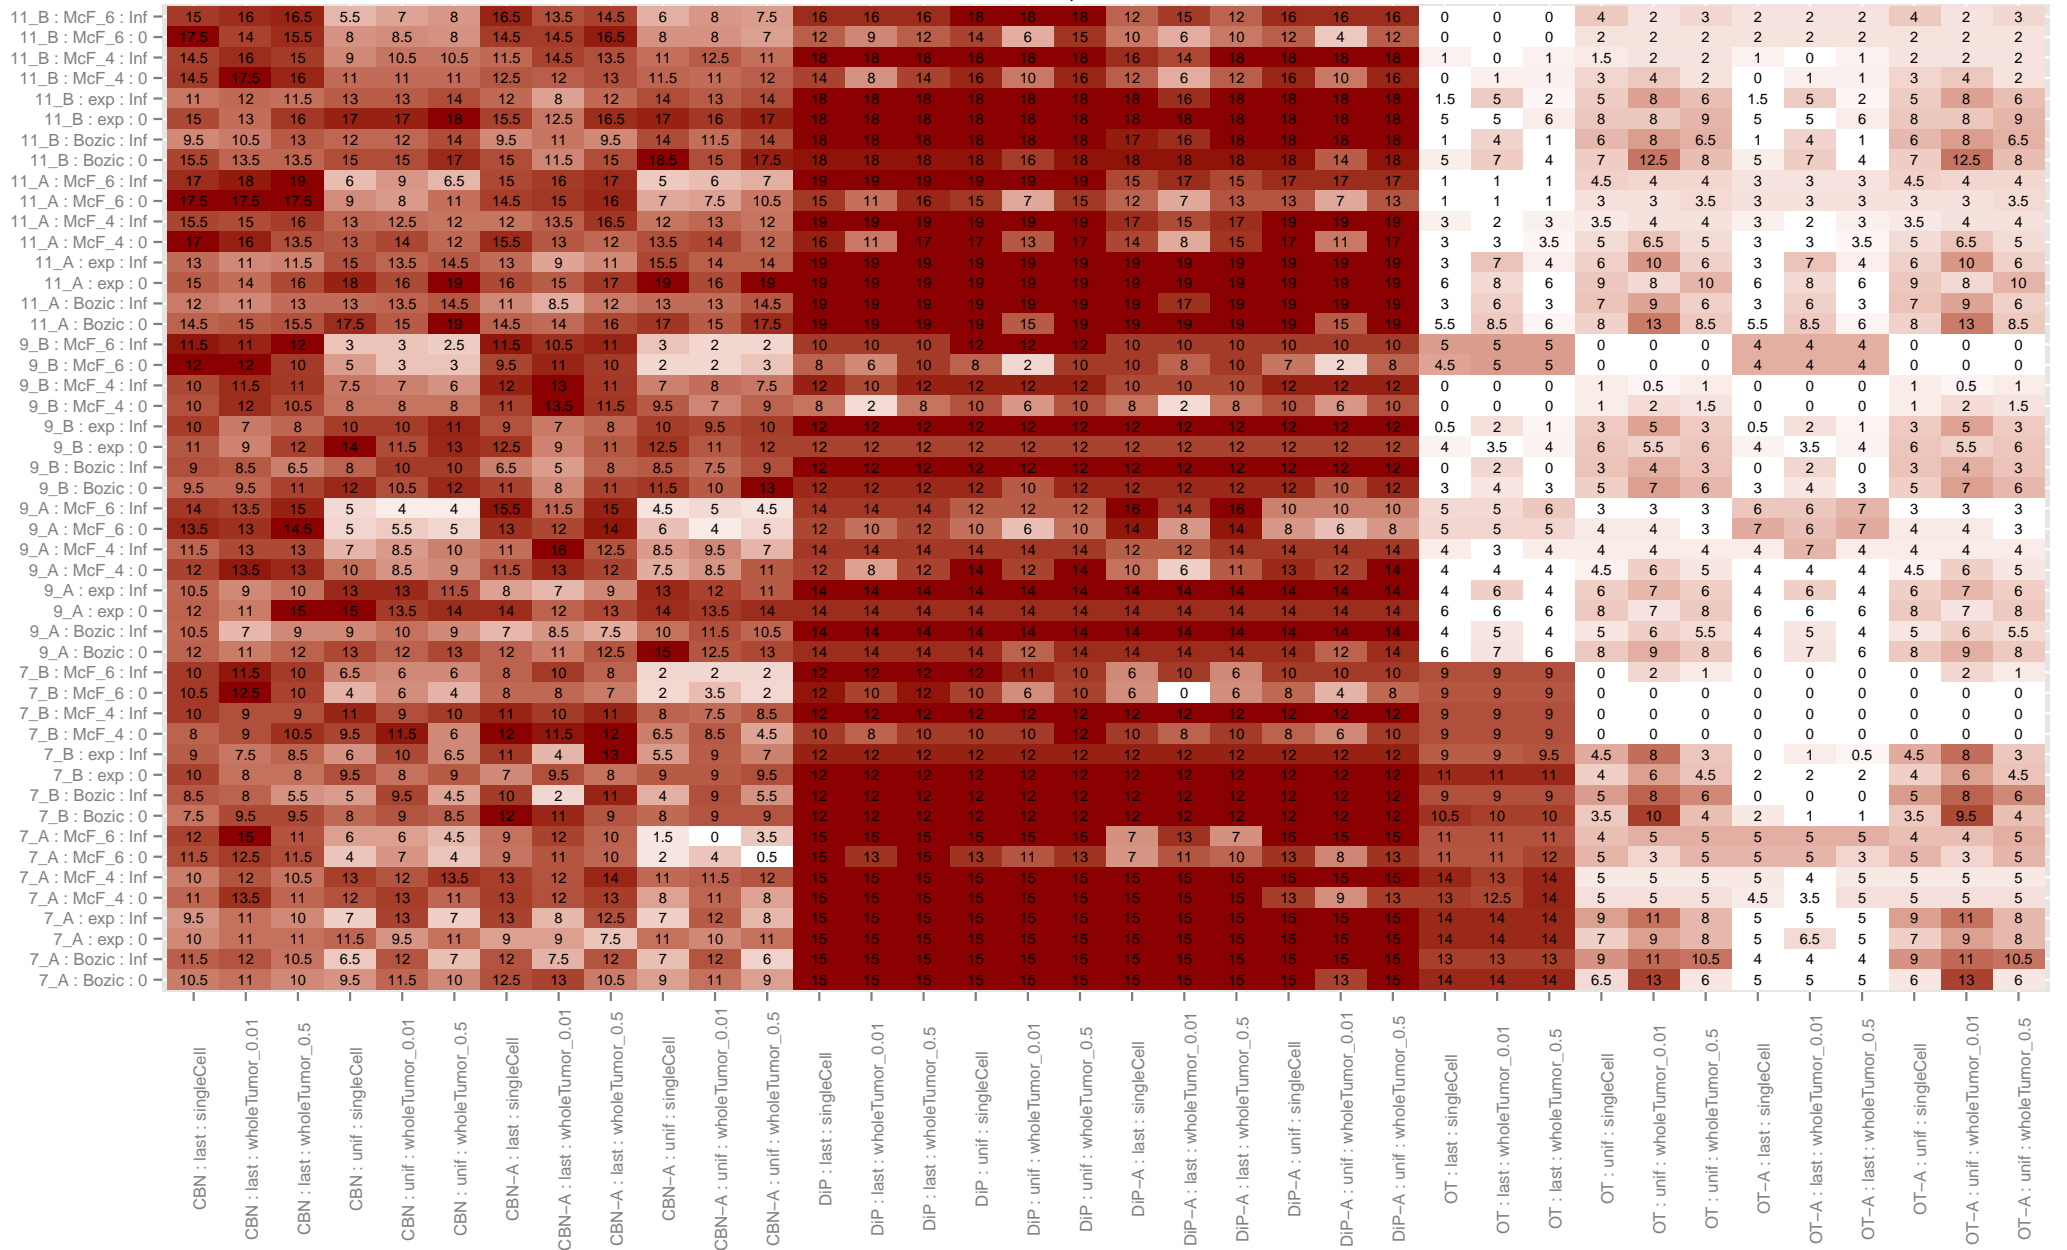

Figure 5: Drivers Known, Diff, N = 200

Diff; N = 100

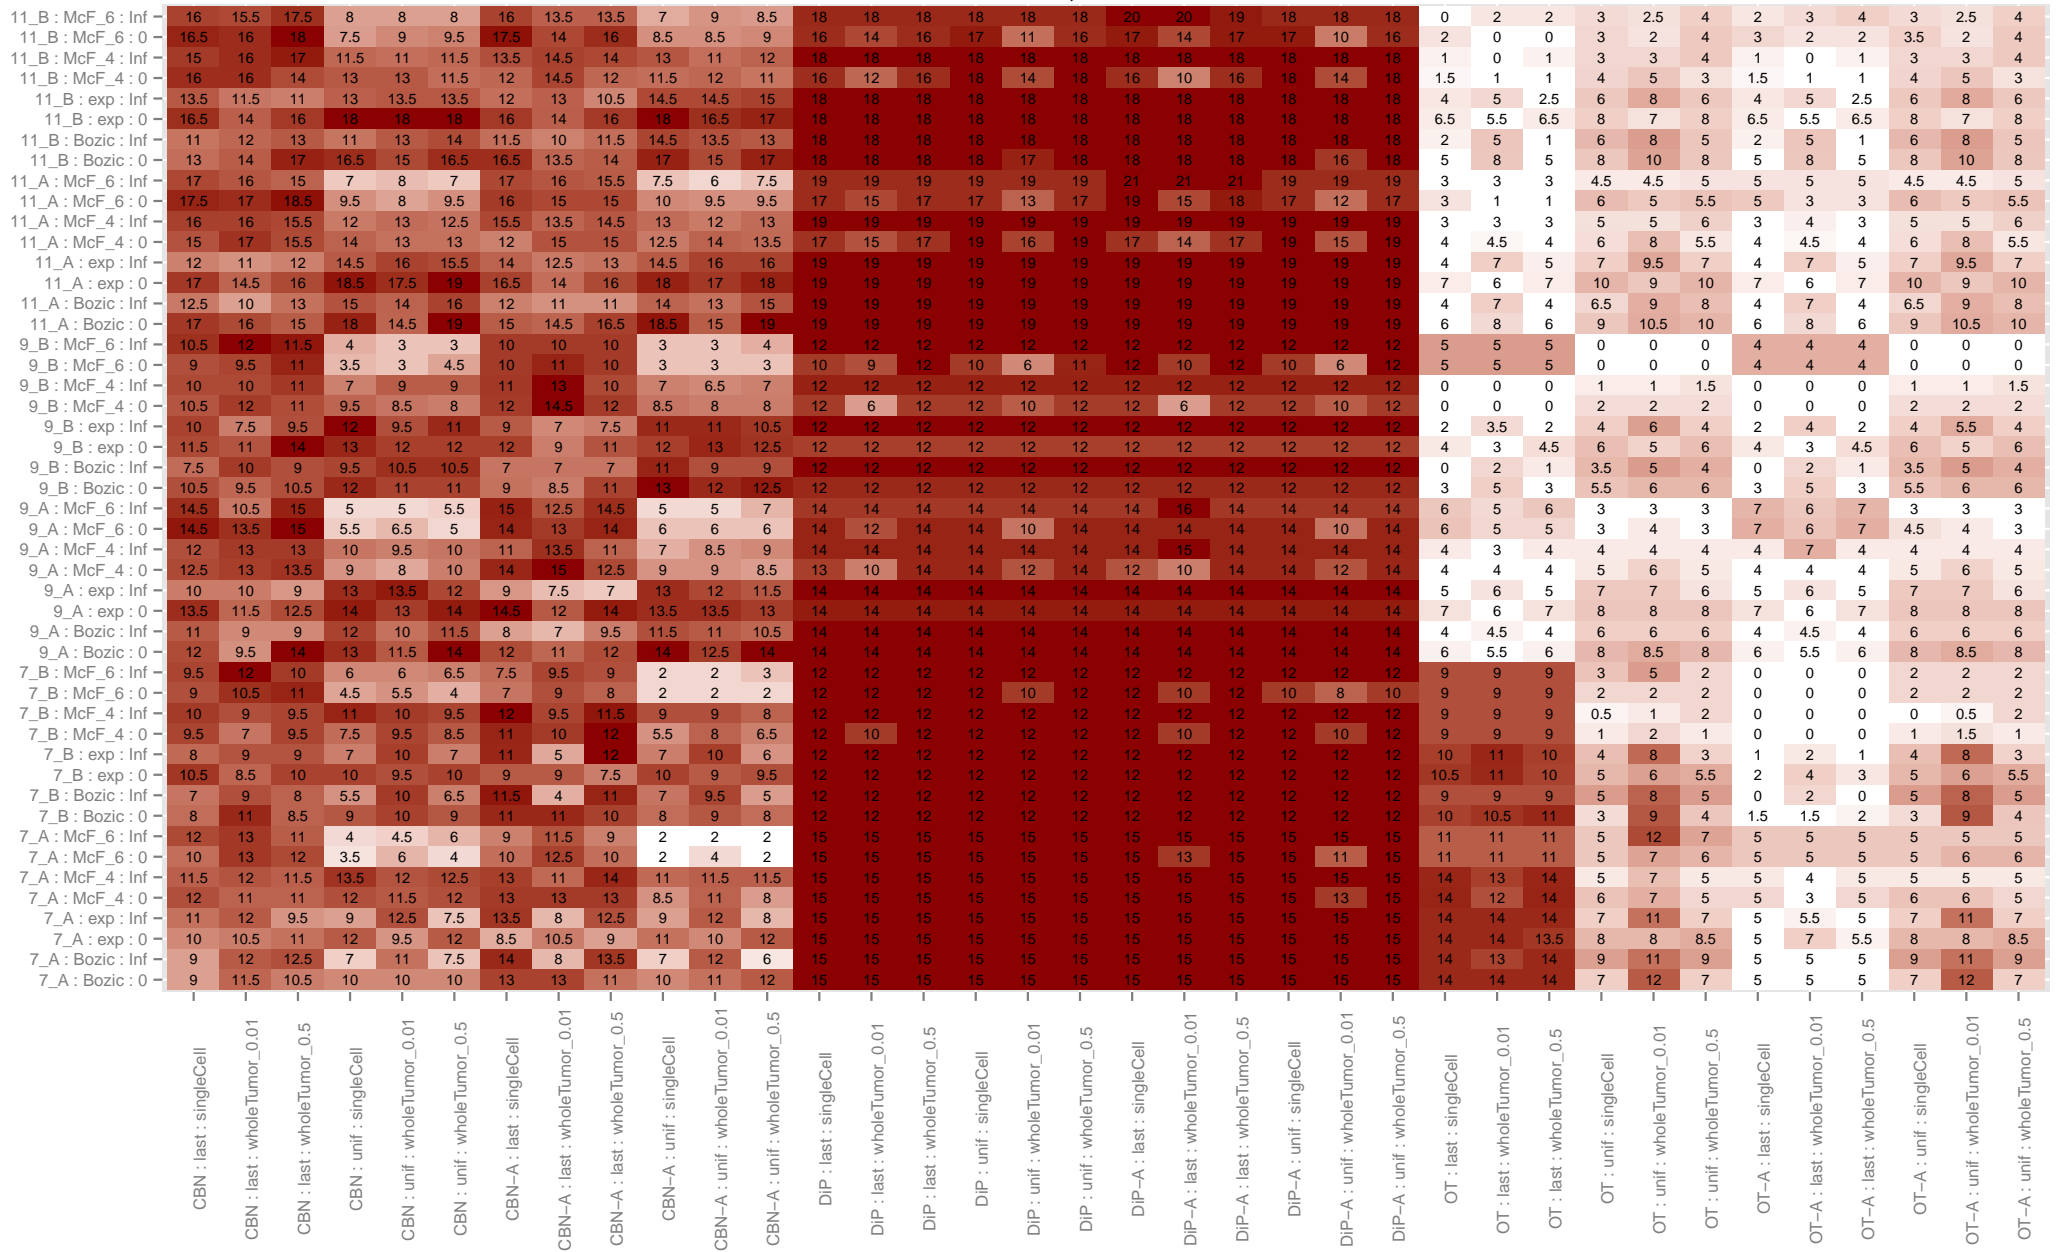

Figure 6: Drivers Known, Diff, N = 100

**2.3 PFD, Drivers Known**

PFD; N = 1000

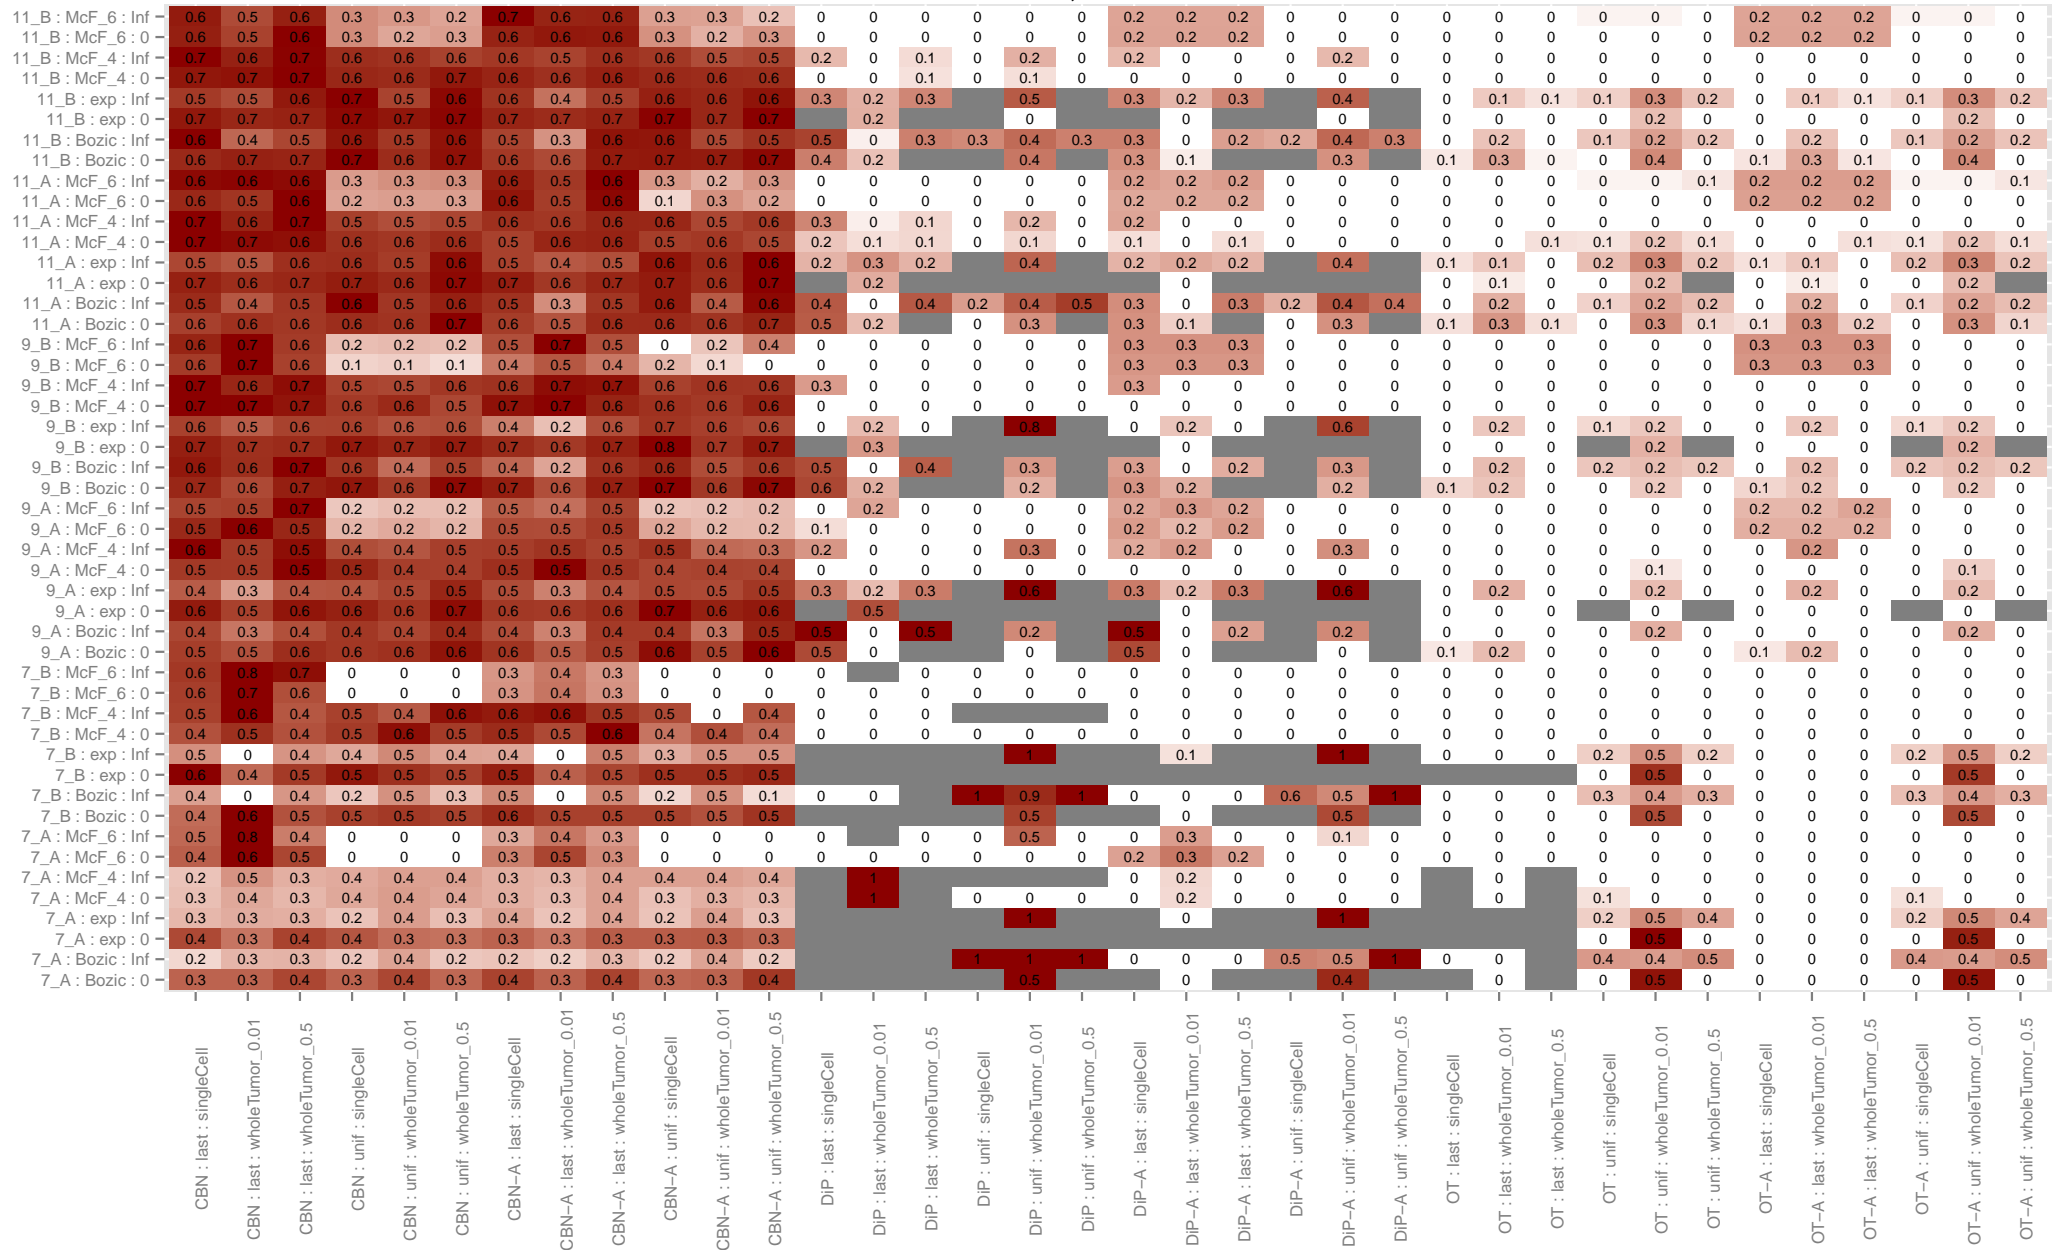

Figure 7: Drivers Known, PFD, N = 1000

PFD; N = 200

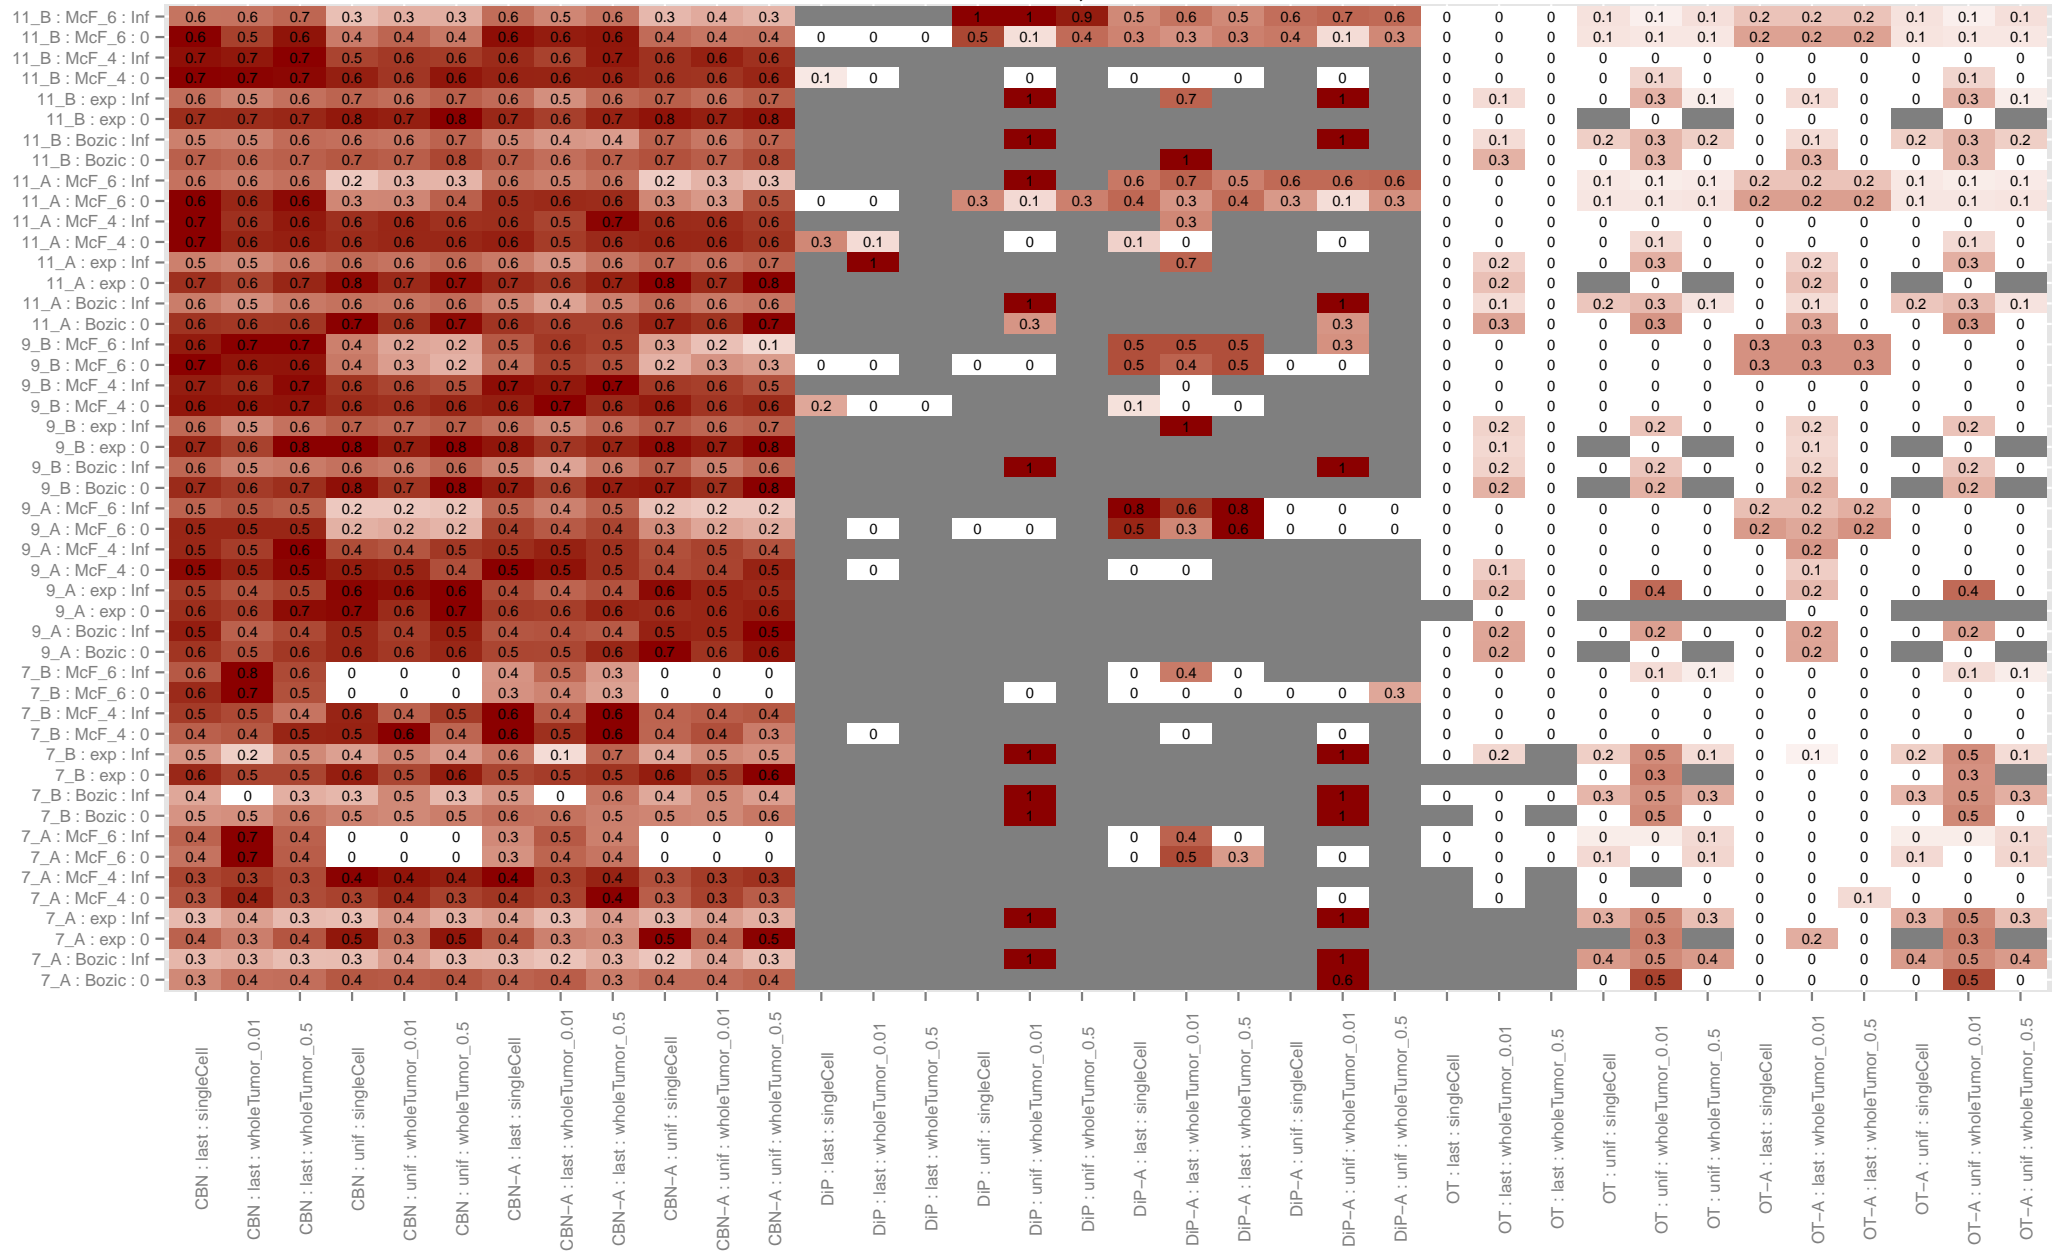

Figure 8: Drivers Known, PFD, N = 200

PFD; N = 100

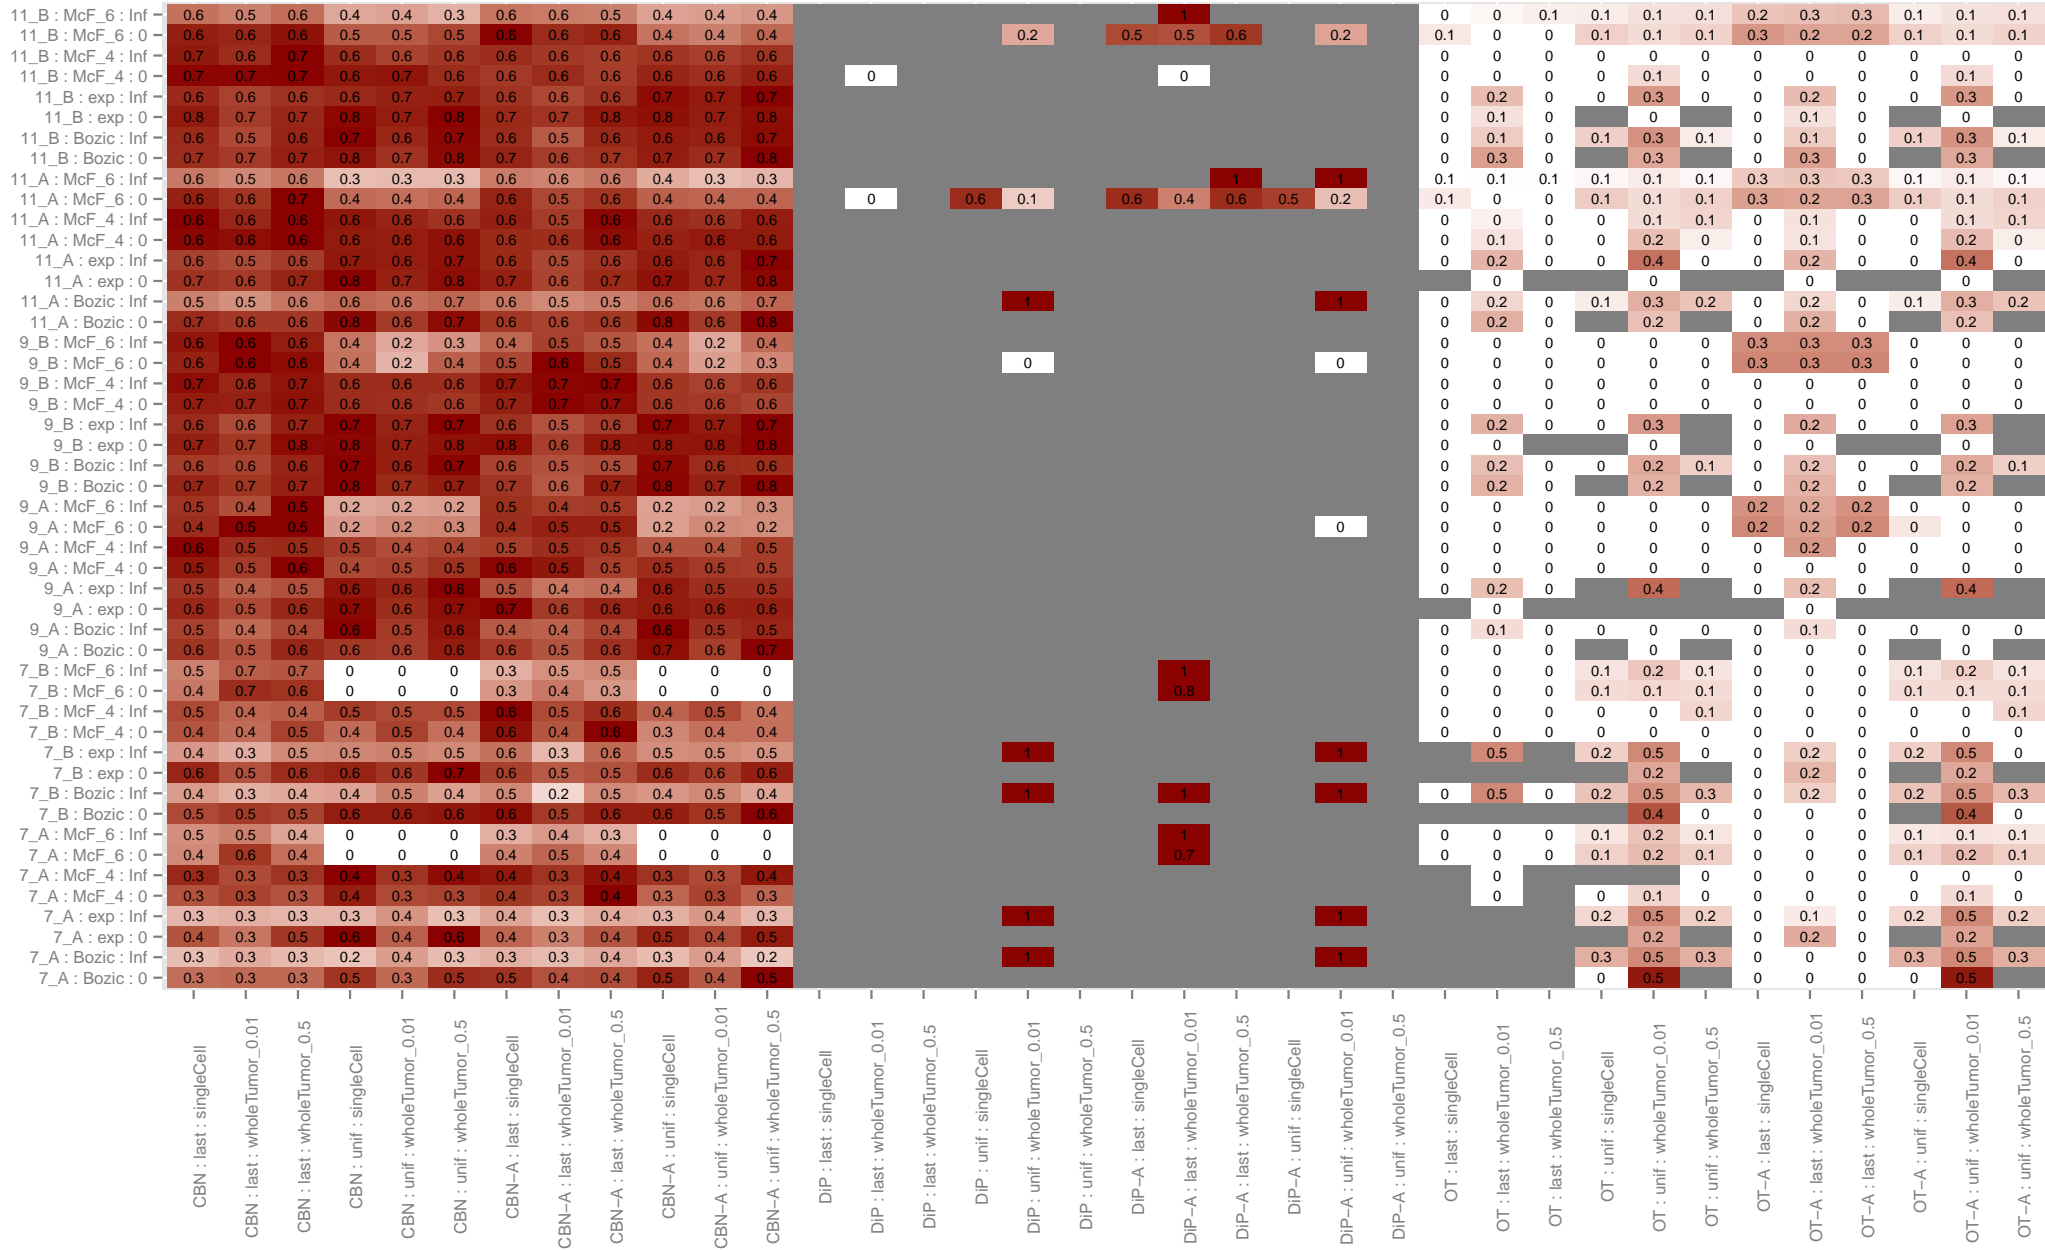

Figure 9: Drivers Known, PFD, N = 100

**2.4 PND, Drivers Known**



PND; N = 1000

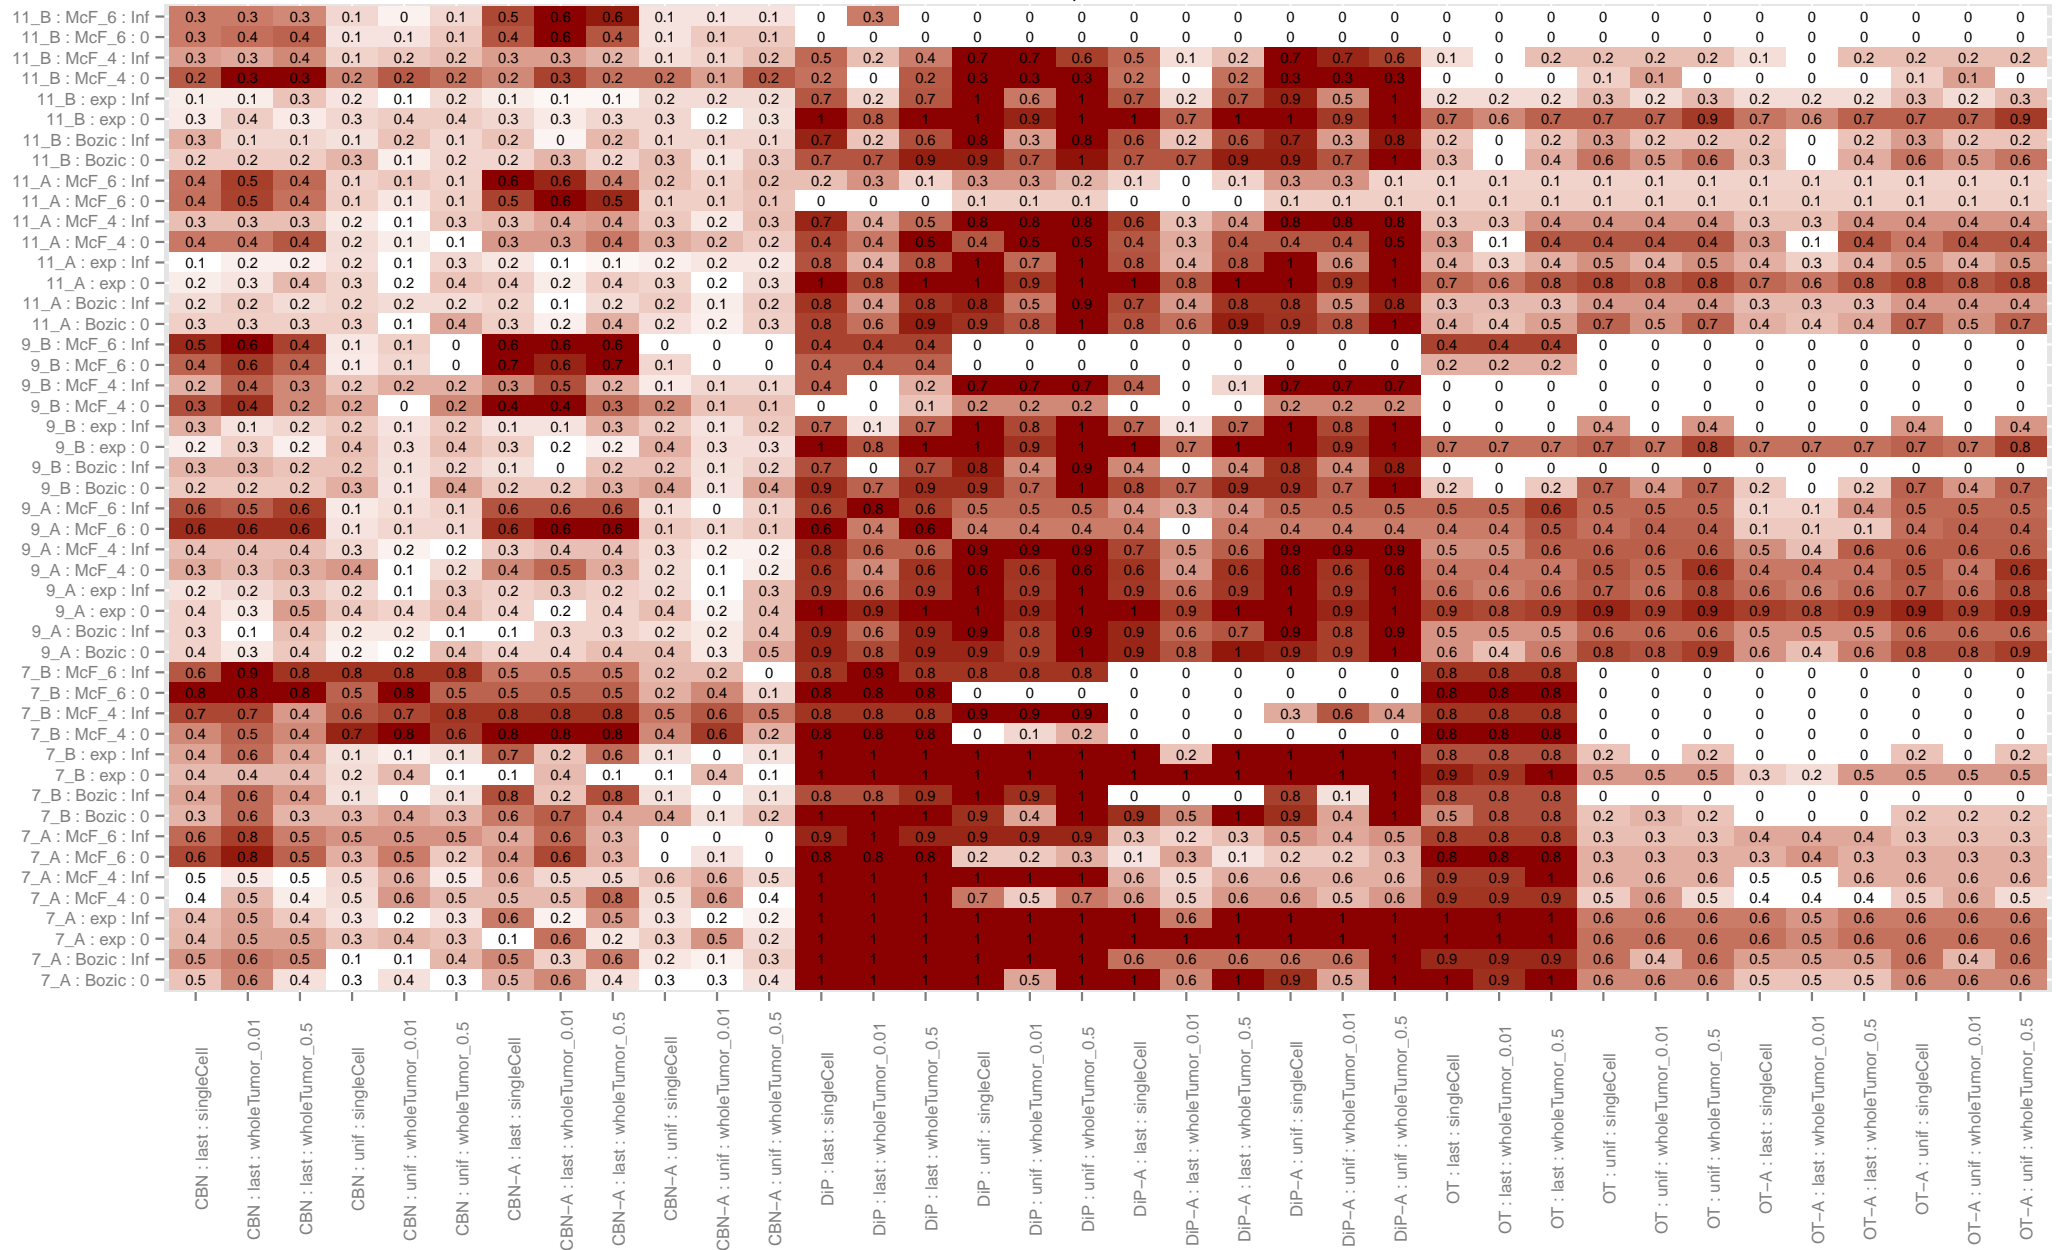

Figure 10: Drivers Known, PND, N = 1000

PND; N = 200

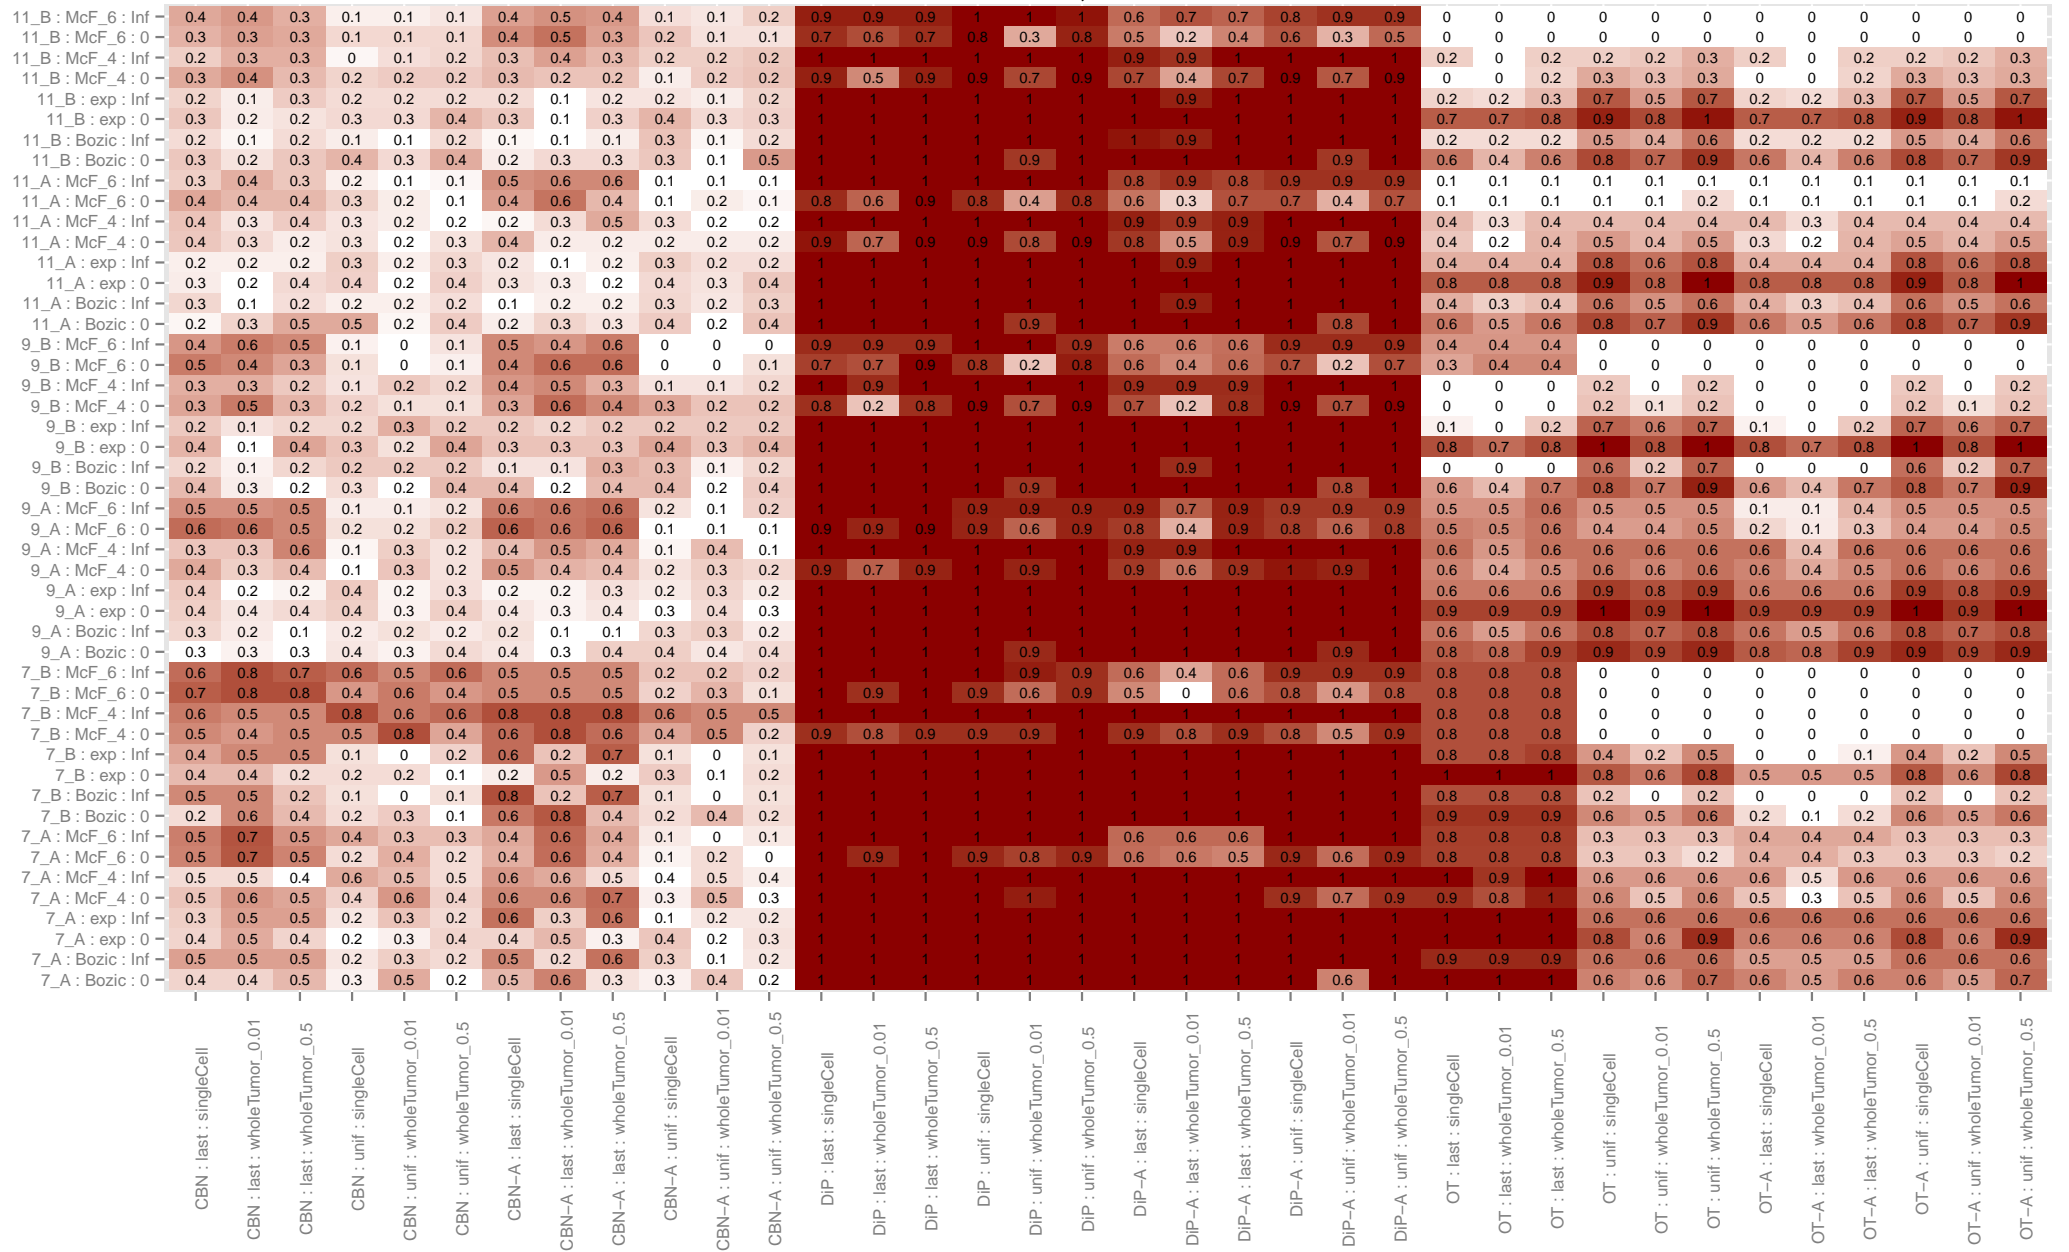

Figure 11: Drivers Known, PND, N = 200

PND; N = 100

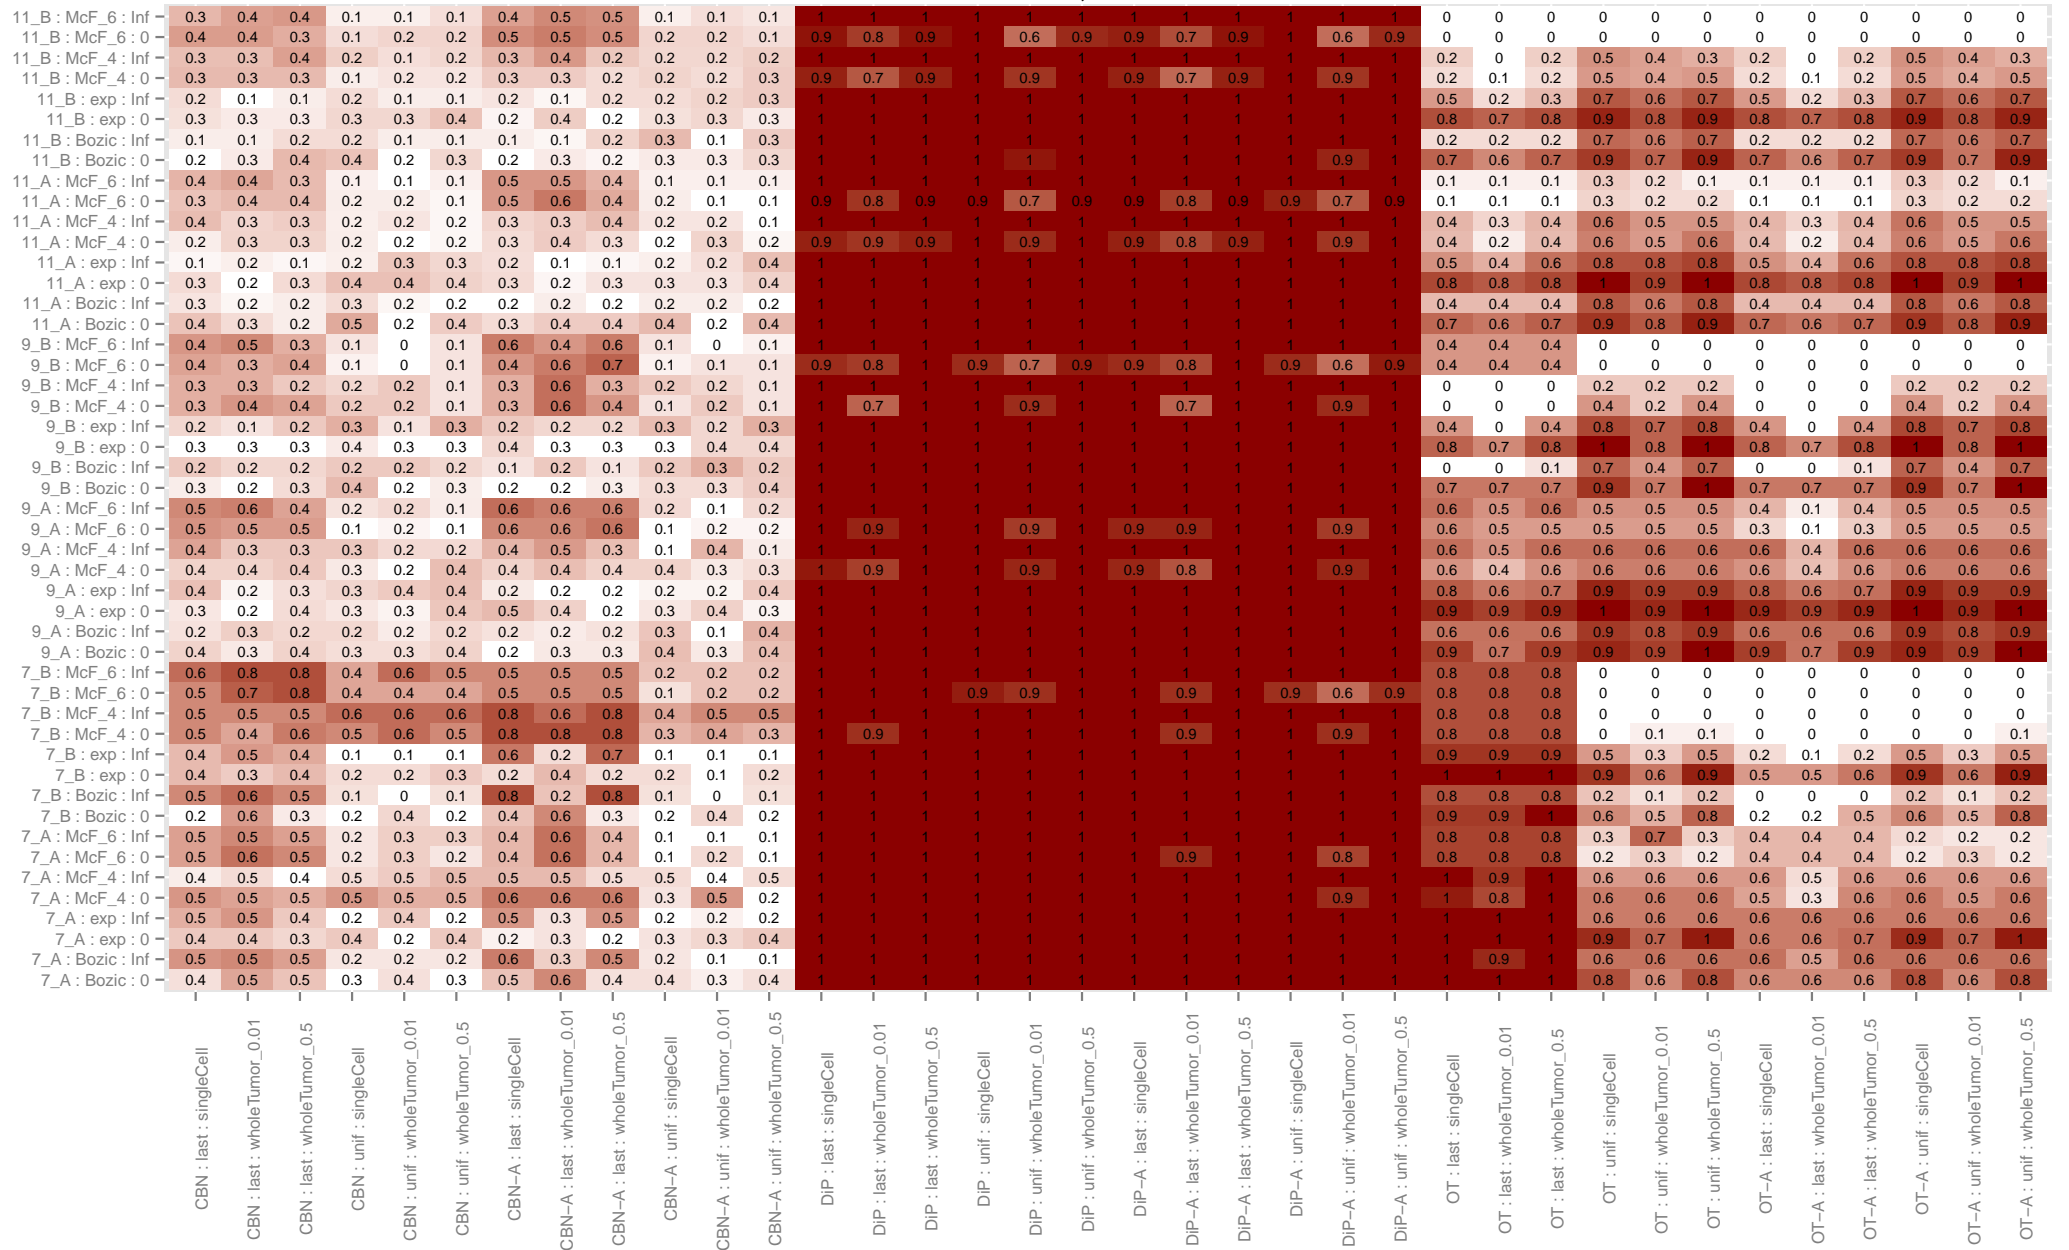

Figure 12: Drivers Known, PND, N = 100

**2.5 FPF, Drivers Known**

FPF (x 10); N = 1000

|                    |     |     |     |     |     |     |     |     |     |     |     |     |     |     |     |     |     |     |     |     |     |     |     |     |     |     |     |     |     |     |     |     |     |     |     |     |     |
|--------------------|-----|-----|-----|-----|-----|-----|-----|-----|-----|-----|-----|-----|-----|-----|-----|-----|-----|-----|-----|-----|-----|-----|-----|-----|-----|-----|-----|-----|-----|-----|-----|-----|-----|-----|-----|-----|-----|
| 11_B : McF_6 : Inf | 1.7 | 1.1 | 1.7 | 0.7 | 0.6 | 0.4 | 1.5 | 0.8 | 1.3 | 0.5 | 0.5 | 0.3 | 0   | 0   | 0   | 0   | 0   | 0   | 0.5 | 0.5 | 0.5 | 0   | 0   | 0   | 0   | 0   | 0   | 0   | 0.1 | 0.1 | 0   | 0.5 | 0.5 | 0.5 | 0.1 | 0.1 | 0   |
| 11_B : McF_6 : 0   | 1.6 | 1.2 | 1.7 | 0.6 | 0.4 | 0.5 | 1.4 | 1.1 | 1.3 | 0.6 | 0.3 | 0.5 | 0   | 0   | 0   | 0   | 0   | 0   | 0.5 | 0.5 | 0.5 | 0   | 0   | 0   | 0   | 0   | 0   | 0   | 0   | 0   | 0.5 | 0.5 | 0.5 | 0   | 0   | 0   |     |
| 11_B : McF_4 : Inf | 2.3 | 1.8 | 2.1 | 2.1 | 1.8 | 1.7 | 1.5 | 1.2 | 1.9 | 1.8 | 1.4 | 1.6 | 0.2 | 0   | 0.1 | 0   | 0.2 | 0   | 0.2 | 0   | 0   | 0   | 0.1 | 0   | 0   | 0   | 0   | 0   | 0   | 0   | 0   | 0   | 0   | 0   | 0   | 0   | 0   |
| 11_B : McF_4 : 0   | 2.2 | 2.2 | 2.2 | 2.1 | 1.9 | 2.3 | 1.9 | 1.6 | 2.1 | 1.8 | 2.1 | 1.8 | 0   | 0   | 0.1 | 0   | 0.1 | 0   | 0   | 0   | 0   | 0   | 0   | 0   | 0   | 0   | 0   | 0   | 0   | 0   | 0   | 0   | 0   | 0   | 0   | 0   | 0   |
| 11_B : exp : Inf   | 1.6 | 1.4 | 1.9 | 2.4 | 1.7 | 2.2 | 1.8 | 0.9 | 1.3 | 2.2 | 1.6 | 2   | 0.2 | 0.3 | 0.2 | 0.1 | 0.7 | 0.1 | 0.2 | 0.3 | 0.2 | 0.1 | 0.6 | 0.1 | 0   | 0.2 | 0.1 | 0.1 | 0.6 | 0.2 | 0   | 0.2 | 0.1 | 0.1 | 0.6 | 0.2 |     |
| 11_B : exp : 0     | 2.9 | 2.3 | 2.6 | 2.9 | 2.4 | 3.1 | 2.4 | 2.3 | 2.6 | 2.8 | 2.7 | 3.3 | 0   | 0.1 | 0   | 0   | 0   | 0   | 0   | 0   | 0   | 0   | 0   | 0   | 0   | 0   | 0   | 0   | 0   | 0.1 | 0   | 0   | 0   | 0   | 0   | 0.1 | 0   |
| 11_B : Bozic : Inf | 1.9 | 0.9 | 1.4 | 1.8 | 1.4 | 2.1 | 1.3 | 0.6 | 1.6 | 1.9 | 1.2 | 1.7 | 0.4 | 0.1 | 0.3 | 0.1 | 0.7 | 0.2 | 0.3 | 0   | 0.2 | 0.1 | 0.7 | 0.2 | 0   | 0.3 | 0   | 0.2 | 0.4 | 0.2 | 0   | 0.3 | 0   | 0.2 | 0.4 | 0.2 |     |
| 11_B : Bozic : 0   | 2.1 | 2.1 | 2.4 | 2.9 | 2.4 | 2.7 | 2.1 | 1.5 | 2.7 | 2.6 | 2.7 | 2.8 | 0.2 | 0.1 | 0.1 | 0   | 0.4 | 0   | 0.2 | 0.1 | 0.1 | 0   | 0.2 | 0   | 0.1 | 0.5 | 0.1 | 0   | 0.5 | 0   | 0.1 | 0.5 | 0.1 | 0   | 0.5 | 0   |     |
| 11_A : McF_6 : Inf | 1.6 | 1.3 | 1.5 | 0.5 | 0.6 | 0.6 | 1.1 | 0.9 | 1.5 | 0.5 | 0.4 | 0.5 | 0   | 0   | 0   | 0   | 0   | 0   | 0.5 | 0.5 | 0.5 | 0   | 0   | 0   | 0   | 0   | 0   | 0.1 | 0.1 | 0.1 | 0.5 | 0.5 | 0.5 | 0.1 | 0.1 | 0.1 |     |
| 11_A : McF_6 : 0   | 1.4 | 1.2 | 1.6 | 0.5 | 0.6 | 0.6 | 1.2 | 0.8 | 1.5 | 0.2 | 0.5 | 0.4 | 0   | 0   | 0   | 0   | 0   | 0   | 0.5 | 0.5 | 0.5 | 0   | 0   | 0   | 0   | 0   | 0   | 0   | 0   | 0   | 0.5 | 0.5 | 0.5 | 0   | 0   | 0   |     |
| 11_A : McF_4 : Inf | 2.6 | 2.2 | 2.4 | 1.6 | 1.6 | 1.7 | 1.8 | 1.4 | 1.8 | 1.8 | 1.7 | 1.7 | 0.3 | 0.1 | 0.1 | 0   | 0.1 | 0   | 0.2 | 0   | 0   | 0   | 0   | 0   | 0   | 0   | 0   | 0   | 0   | 0   | 0   | 0   | 0   | 0   | 0   | 0   |     |
| 11_A : McF_4 : 0   | 2.3 | 2.1 | 2.2 | 1.9 | 2   | 2.3 | 1.6 | 1.8 | 1.9 | 1.7 | 1.7 | 1.7 | 0.2 | 0.1 | 0.1 | 0   | 0.1 | 0   | 0.1 | 0   | 0.1 | 0   | 0.1 | 0   | 0   | 0   | 0   | 0.1 | 0.1 | 0.2 | 0.1 | 0   | 0.1 | 0.1 | 0.2 | 0.1 |     |
| 11_A : exp : Inf   | 1.6 | 1.3 | 1.7 | 2   | 1.8 | 1.8 | 1.7 | 1.3 | 1.5 | 2   | 1.8 | 2.4 | 0.1 | 0.4 | 0.1 | 0.1 | 0.5 | 0.2 | 0.1 | 0.3 | 0.1 | 0.1 | 0.5 | 0.1 | 0.1 | 0.2 | 0   | 0.1 | 0.5 | 0.2 | 0.1 | 0.2 | 0   | 0.1 | 0.5 | 0.2 |     |
| 11_A : exp : 0     | 2.7 | 2.2 | 2.3 | 2.8 | 2.7 | 2.7 | 2.6 | 2.2 | 2.5 | 2.7 | 2.7 | 3.2 | 0   | 0.1 | 0   | 0   | 0   | 0   | 0   | 0   | 0   | 0   | 0   | 0   | 0   | 0   | 0.1 | 0   | 0.1 | 0   | 0   | 0.1 | 0   | 0   | 0.1 | 0   |     |
| 11_A : Bozic : Inf | 1.5 | 1   | 1.7 | 2   | 1.5 | 1.9 | 1.7 | 0.6 | 1.7 | 1.8 | 1.2 | 1.9 | 0.3 | 0   | 0.3 | 0.1 | 0.6 | 0.2 | 0.2 | 0   | 0.2 | 0.1 | 0.6 | 0.2 | 0   | 0.3 | 0   | 0.1 | 0.3 | 0.2 | 0   | 0.3 | 0   | 0.1 | 0.3 | 0.2 |     |
| 11_A : Bozic : 0   | 1.6 | 1.9 | 1.9 | 2.2 | 2.6 | 2.6 | 2.3 | 1.6 | 2.2 | 2.6 | 2.6 | 2.6 | 0.3 | 0.1 | 0.2 | 0   | 0.2 | 0   | 0.2 | 0.1 | 0.2 | 0   | 0.2 | 0   | 0.1 | 0.6 | 0.1 | 0   | 0.4 | 0.1 | 0.1 | 0.6 | 0.2 | 0   | 0.4 | 0.1 |     |
| 9_B : McF_6 : Inf  | 1   | 1.4 | 1   | 0.3 | 0.3 | 0.3 | 0.6 | 1.3 | 0.6 | 0   | 0.2 | 0.8 | 0   | 0   | 0   | 0   | 0   | 0   | 0.6 | 0.6 | 0.6 | 0   | 0   | 0   | 0   | 0   | 0   | 0   | 0   | 0.6 | 0.6 | 0.6 | 0   | 0   | 0   | 0   |     |
| 9_B : McF_6 : 0    | 1.2 | 1.4 | 1   | 0.2 | 0.2 | 0.2 | 0.5 | 0.7 | 0.3 | 0.4 | 0.2 | 0   | 0   | 0   | 0   | 0   | 0   | 0   | 0.6 | 0.6 | 0.6 | 0   | 0   | 0   | 0   | 0   | 0   | 0   | 0   | 0   | 0   | 0   | 0   | 0   | 0   | 0   |     |
| 9_B : McF_4 : Inf  | 2.3 | 1.3 | 2.2 | 1.5 | 1.2 | 1.4 | 1.3 | 1.3 | 2.1 | 1.4 | 1.6 | 1.8 | 0.3 | 0   | 0   | 0   | 0   | 0   | 0.3 | 0   | 0   | 0   | 0   | 0   | 0   | 0   | 0   | 0   | 0   | 0   | 0   | 0   | 0   | 0   | 0   | 0   |     |
| 9_B : McF_4 : 0    | 2.1 | 1.7 | 2.1 | 1.4 | 1.7 | 1.3 | 1.6 | 1.5 | 1.6 | 1.5 | 1.4 | 1.6 | 0   | 0   | 0   | 0   | 0   | 0   | 0   | 0   | 0   | 0   | 0   | 0   | 0   | 0   | 0   | 0   | 0   | 0   | 0   | 0   | 0   | 0   | 0   | 0   |     |
| 9_B : exp : Inf    | 1.9 | 1.3 | 1.8 | 1.9 | 1.7 | 1.7 | 1   | 0.3 | 1.6 | 1.9 | 2.3 | 1.3 | 0   | 0.3 | 0   | 0   | 0.8 | 0   | 0   | 0.3 | 0   | 0   | 0.7 | 0   | 0   | 0.3 | 0   | 0.2 | 0.3 | 0   | 0   | 0.3 | 0   | 0.2 | 0.3 | 0   |     |
| 9_B : exp : 0      | 2.5 | 2.1 | 2.7 | 2.7 | 2.2 | 2.7 | 2.1 | 1.9 | 2.6 | 2.5 | 2.2 | 2.6 | 0   | 0.2 | 0   | 0   | 0   | 0   | 0   | 0   | 0   | 0   | 0   | 0   | 0   | 0   | 0   | 0   | 0   | 0   | 0   | 0   | 0   | 0   | 0   | 0.2 | 0.3 |
| 9_B : Bozic : Inf  | 1.7 | 1.3 | 1.9 | 1.4 | 0.9 | 1.3 | 1   | 0.4 | 1.6 | 1.6 | 1.2 | 1.3 | 0.5 | 0   | 0.4 | 0   | 0.3 | 0.2 | 0.2 | 0   | 0.2 | 0   | 0.3 | 0.2 | 0   | 0.3 | 0   | 0.2 | 0.3 | 0.2 | 0   | 0.3 | 0   | 0.2 | 0.3 | 0.2 |     |
| 9_B : Bozic : 0    | 2.3 | 1.6 | 2.5 | 2.1 | 2.1 | 2.5 | 2.1 | 1.3 | 2.3 | 2.4 | 2   | 2.5 | 0.2 | 0.2 | 0.2 | 0   | 0.2 | 0   | 0.2 | 0.2 | 0.2 | 0   | 0.2 | 0   | 0.2 | 0.3 | 0   | 0.2 | 0   | 0.2 | 0.3 | 0   | 0   | 0.2 | 0   |     |     |
| 9_A : McF_6 : Inf  | 1.2 | 1.4 | 1.6 | 0.3 | 0.5 | 0.5 | 0.9 | 0.9 | 0.9 | 0.4 | 0.5 | 0.5 | 0   | 0.2 | 0   | 0   | 0   | 0   | 0.5 | 0.7 | 0.5 | 0   | 0   | 0   | 0   | 0   | 0   | 0   | 0   | 0   | 0.5 | 0.5 | 0.5 | 0   | 0   | 0   |     |
| 9_A : McF_6 : 0    | 1.3 | 1.3 | 1.6 | 0.5 | 0.5 | 0.5 | 0.7 | 0.8 | 0.9 | 0.5 | 0.5 | 0.3 | 0.1 | 0   | 0   | 0   | 0   | 0   | 0.5 | 0.5 | 0.5 | 0   | 0   | 0   | 0   | 0   | 0   | 0   | 0   | 0.5 | 0.5 | 0.5 | 0   | 0   | 0   |     |     |
| 9_A : McF_4 : Inf  | 1.9 | 1.2 | 2   | 1.3 | 1.2 | 1.5 | 1.4 | 1.3 | 1.4 | 1.6 | 1   | 0.9 | 0.2 | 0   | 0   | 0   | 0.2 | 0   | 0.2 | 0.4 | 0   | 0   | 0.2 | 0   | 0   | 0   | 0   | 0   | 0   | 0   | 0.5 | 0   | 0   | 0   | 0   | 0   |     |
| 9_A : McF_4 : 0    | 1.5 | 1.6 | 1.9 | 1.6 | 1.4 | 1.3 | 1.6 | 1.6 | 1.2 | 1.5 | 1.7 | 1.7 | 0   | 0   | 0   | 0   | 0   | 0   | 0   | 0   | 0   | 0   | 0   | 0   | 0   | 0   | 0   | 0   | 0.1 | 0   | 0   | 0   | 0   | 0   | 0.2 | 0   |     |
| 9_A : exp : Inf    | 1.4 | 0.7 | 1.2 | 1.6 | 2   | 1.6 | 1.5 | 0.9 | 1.4 | 1.7 | 1.6 | 1.9 | 0.2 | 0.2 | 0.2 | 0   | 0.5 | 0   | 0.2 | 0.2 | 0.2 | 0   | 0.5 | 0   | 0   | 0.3 | 0   | 0.2 | 0   | 0   | 0.3 | 0   | 0   | 0.2 | 0   |     |     |
| 9_A : exp : 0      | 2.6 | 2   | 2   | 2.4 | 2   | 2.7 | 2.1 | 2.2 | 2.1 | 2.5 | 2.5 | 2.6 | 0   | 0.2 | 0   | 0   | 0   | 0   | 0   | 0   | 0   | 0   | 0   | 0   | 0   | 0   | 0   | 0   | 0   | 0   | 0   | 0   | 0   | 0   | 0   | 0   |     |
| 9_A : Bozic : Inf  | 1.2 | 0.8 | 0.9 | 1.4 | 1.2 | 1.6 | 1.1 | 0.7 | 1   | 1.2 | 0.9 | 1.2 | 0.3 | 0   | 0.3 | 0   | 0.2 | 0   | 0.3 | 0   | 0.2 | 0   | 0.2 | 0   | 0   | 0   | 0   | 0.2 | 0   | 0   | 0   | 0   | 0   | 0   | 0.2 | 0   |     |
| 9_A : Bozic : 0    | 2.1 | 1.4 | 2.2 | 2.2 | 2.3 | 2.5 | 1.7 | 1.5 | 1.6 | 2.2 | 2   | 2.4 | 0.2 | 0   | 0.2 | 0   | 0   | 0   | 0.2 | 0   | 0.2 | 0   | 0   | 0   | 0.1 | 0.3 | 0   | 0   | 0   | 0.1 | 0.3 | 0   | 0   | 0   | 0   | 0   |     |
| 7_B : McF_6 : Inf  | 1   | 1.6 | 1.2 | 0   | 0   | 0   | 0.6 | 0.9 | 0.6 | 0   | 0   | 0   | 0   | 0   | 0   | 0   | 0   | 0   | 0   | 0   | 0   | 0   | 0   | 0   | 0   | 0   | 0   | 0   | 0   | 0   | 0   | 0   | 0   | 0   | 0   | 0   |     |
| 7_B : McF_6 : 0    | 1.2 | 1.3 | 0.9 | 0   | 0   | 0   | 0.6 | 0.9 | 0.6 | 0   | 0   | 0   | 0   | 0   | 0   | 0   | 0   | 0   | 0   | 0   | 0   | 0   | 0   | 0   | 0   | 0   | 0   | 0   | 0   | 0   | 0   | 0   | 0   | 0   | 0   | 0   |     |
| 7_B : McF_4 : Inf  | 0.9 | 0.9 | 1.2 | 0.9 | 0.9 | 0.9 | 0.9 | 0.9 | 0.9 | 1   | 0   | 1   | 0   | 0   | 0   | 0   | 0   | 0   | 0   | 0   | 0   | 0   | 0   | 0   | 0   | 0   | 0   | 0   | 0   | 0   | 0   | 0   | 0   | 0   | 0   | 0   | 0   |
| 7_B : McF_4 : 0    | 1.2 | 0.9 | 1.2 | 0.9 | 0.9 | 0.9 | 0.9 | 0.6 | 1.2 | 0.9 | 1   | 1.2 | 0   | 0   | 0   | 0   | 0   | 0   | 0   | 0   | 0   | 0   | 0   | 0   | 0   | 0   | 0   | 0   | 0   | 0   | 0   | 0   | 0   | 0   | 0   | 0   | 0   |
| 7_B : exp : Inf    | 1.2 | 0   | 1   | 1.2 | 2.1 | 1.2 | 0.4 | 0   | 1.2 | 1   | 1.8 | 1.6 | 0   | 0.3 | 0   | 0   | 1.8 | 0   | 0   | 0.3 | 0   | 0   | 1.8 | 0   | 0   | 0   | 0.6 | 1.8 | 0.3 | 0   | 0   | 0   | 0.6 | 1.8 | 0.3 | 0   |     |
| 7_B : exp : 0      | 1.6 | 0.9 | 1.2 | 2.1 | 1.8 | 1.8 | 2.1 | 0.9 | 1.6 | 2.1 | 1.8 | 2.1 | 0   | 0   | 0   | 0   | 0   | 0   | 0   | 0   | 0   | 0   | 0.3 | 0   | 0   | 0   | 0   | 0   | 0   | 0   | 0   | 0   | 0   | 0   | 0   | 1.2 | 0   |
| 7_B : Bozic : Inf  | 0.9 | 0   | 1.2 | 0.6 | 2.1 | 0.9 | 0.6 | 0   | 0.7 | 0.3 | 1.9 | 0.3 | 0   | 0   | 0.3 | 0.6 | 2.4 | 0.6 | 0   | 0   | 0   | 0   | 0.7 | 2.2 | 0.6 | 0   | 0   | 0.9 | 1.8 | 1   | 0   | 0   | 0   | 0   | 0.9 | 1.8 | 1   |
| 7_B : Bozic : 0    | 0.9 | 1.2 | 1.3 | 1.5 | 1.6 | 1.6 | 0.9 | 0.9 | 1.2 | 1.6 | 1.5 | 1.8 | 0   | 0   | 0   | 0   | 1.2 | 0   | 0   | 0   | 0   | 0   | 1.5 | 0   | 0   | 0   | 0   | 0   | 0   | 0   | 0   | 0   | 0   | 0   | 0   | 1.5 | 0   |
| 7_A : McF_6 : Inf  | 1.1 | 1.3 | 1.3 | 0   | 0   | 0   | 1   | 1.1 | 1.3 | 0   | 0   | 0   | 0   | 0   | 0   | 0   | 0.3 | 0   | 0   | 0   | 0   | 0   | 1.3 | 0   | 0   | 0.3 | 0   | 0   | 0   | 0   | 0   | 0   | 0   | 0   | 0   | 0   | 0   |
| 7_A : McF_6 : 0    | 1   | 1.3 | 1.5 | 0   | 0   | 0   | 1   | 1.1 | 1.3 | 0   | 0   | 0   | 0   | 0   | 0   | 0   | 0   | 0   | 1   | 1.3 | 1   | 0   | 0   | 0   | 0   | 0   | 0   | 0   | 0   | 0   | 0   | 0   | 0   | 0   | 0   | 0   |     |
| 7_A : McF_4 : Inf  | 0.6 | 1.3 | 1   | 1   | 0.8 | 1.3 | 0.6 | 0.6 | 1   | 1.1 | 0.6 | 1   | 0   | 0.3 | 0   | 0   | 0   | 0   | 0   | 0.3 | 0   | 0   | 0   | 0   | 0   | 0   | 0   | 0   | 0   | 0   | 0   | 0   | 0   | 0   | 0   | 0   |     |
| 7_A : McF_4 : 0    | 0.6 | 1   | 0.8 | 1.3 | 1   | 1.3 | 0.6 | 0.6 | 0.6 | 0.6 | 0.6 | 1   | 0   | 0.3 | 0   | 0   | 0   | 0   | 0   | 0.3 | 0   | 0   | 0   | 0   | 0   | 0   | 0   | 0.3 | 0   | 0   | 0   | 0   | 0   | 0   | 0   | 0   |     |
| 7_A : exp : Inf    | 0.6 | 1   | 1   | 0.8 | 1.9 | 1   | 0.6 | 1   | 1.1 | 0.8 | 1.9 | 1   | 0   | 0   | 0   | 0   | 1.3 | 0.3 | 0   | 0   | 0   | 0   | 0   | 0   | 0   | 0   | 0.3 | 1.3 | 0.8 | 0   | 0   | 0   | 0.3 | 1.3 | 0.8 |     |     |
| 7_A : exp : 0      | 1.3 | 0.6 | 1.3 | 1.6 | 1   | 1   | 1.5 | 0.6 | 1.3 |     |     |     |     |     |     |     |     |     |     |     |     |     |     |     |     |     |     |     |     |     |     |     |     |     |     |     |     |

FPF (x 10); N = 200

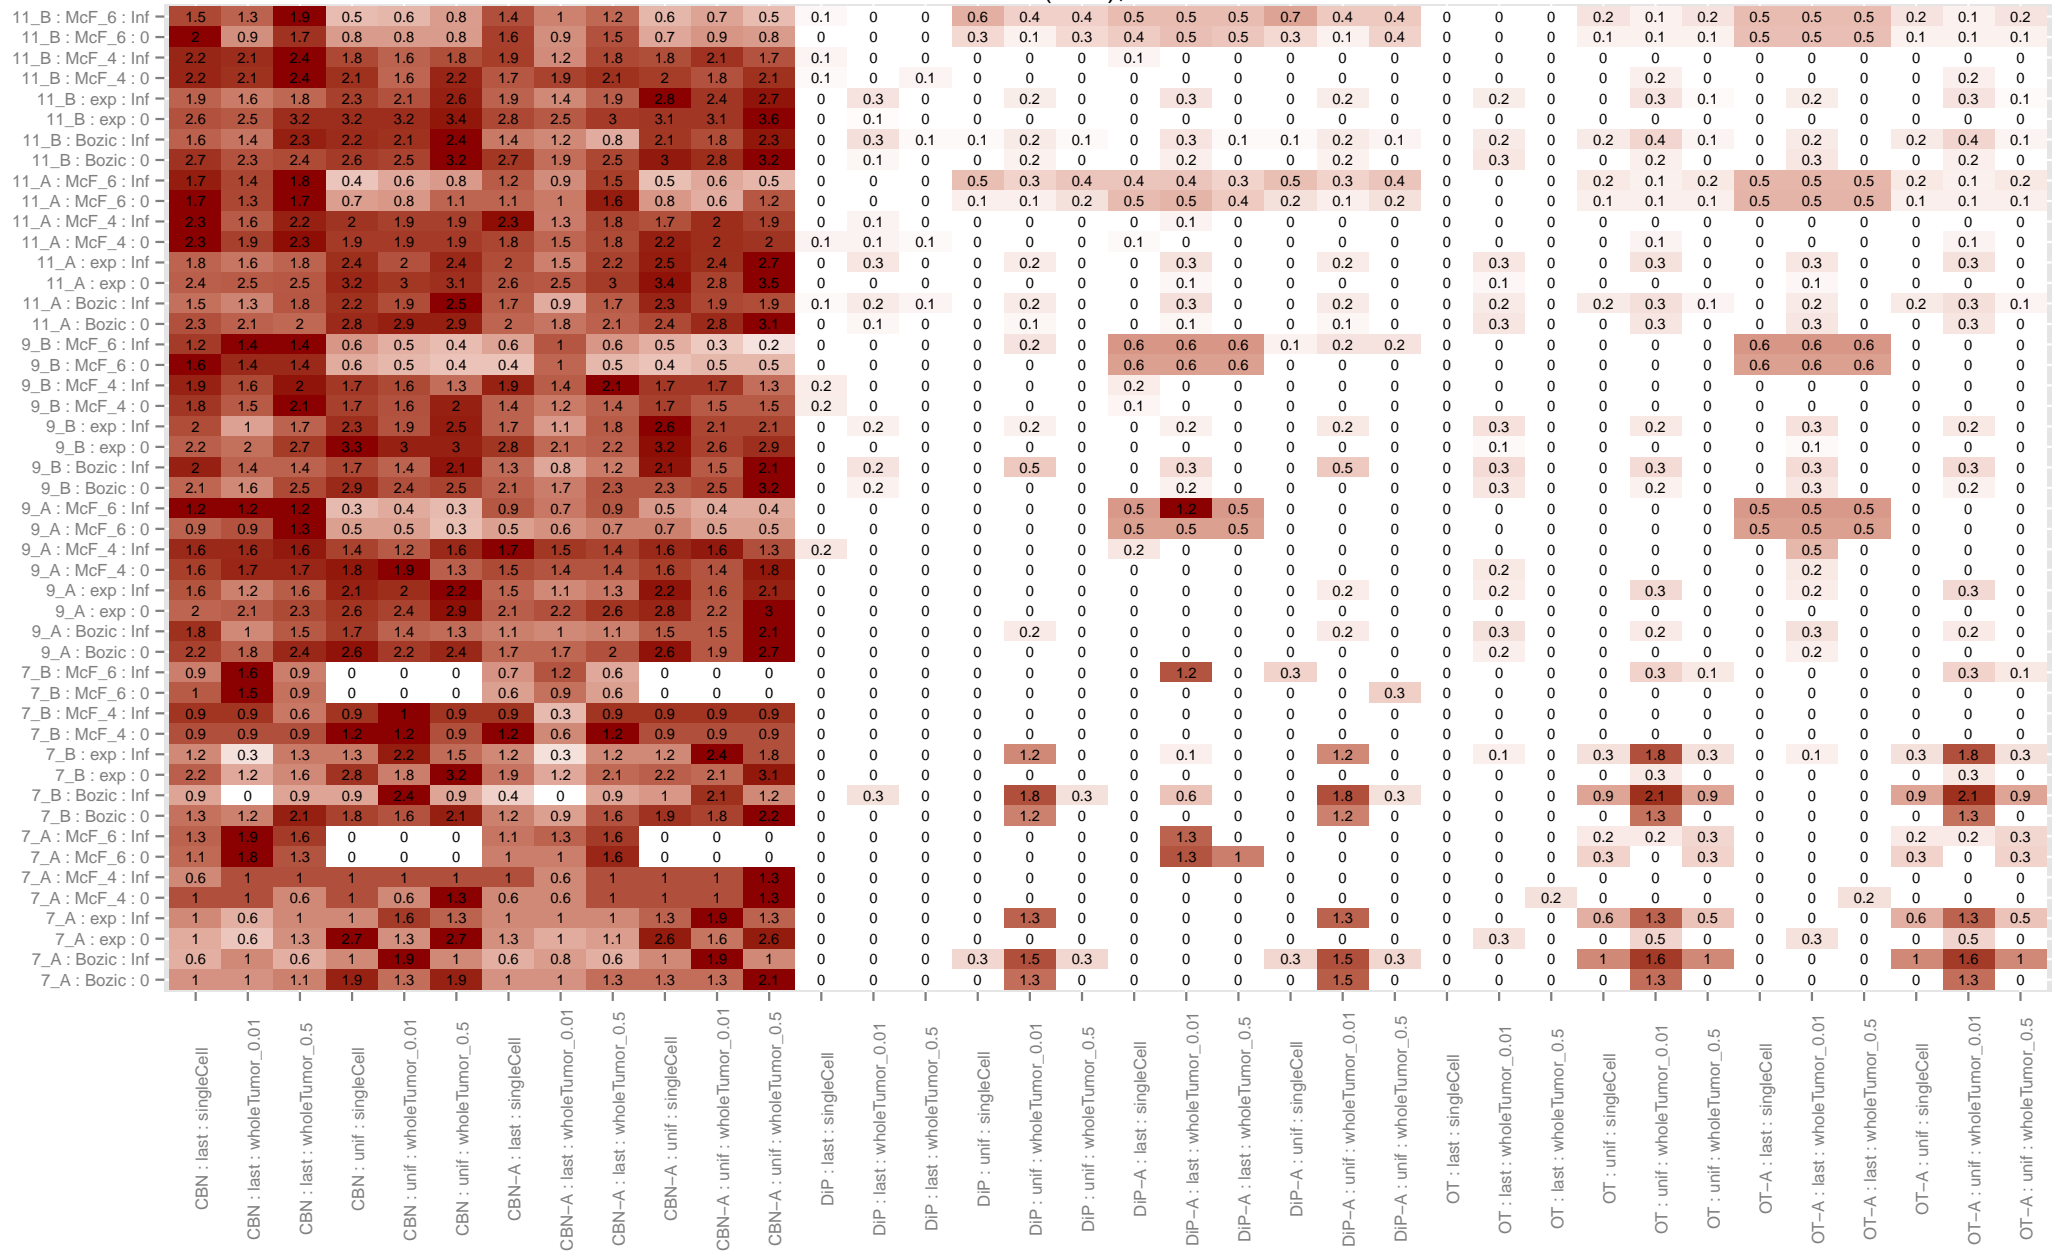

FPF (x 10); N = 100

|                    |     |     |     |     |     |     |     |     |     |     |     |     |     |     |     |     |     |     |     |     |     |     |     |     |     |     |     |     |     |     |     |     |     |     |     |     |     |   |
|--------------------|-----|-----|-----|-----|-----|-----|-----|-----|-----|-----|-----|-----|-----|-----|-----|-----|-----|-----|-----|-----|-----|-----|-----|-----|-----|-----|-----|-----|-----|-----|-----|-----|-----|-----|-----|-----|-----|---|
| 11_B : McF_6 : Inf | 1.6 | 1   | 1.3 | 0.8 | 0.9 | 0.6 | 1.3 | 1.1 | 1.1 | 0.8 | 0.9 | 0.9 | 0   | 0   | 0.1 | 0.3 | 0.3 | 0.2 | 0.2 | 0.4 | 0.2 | 0.3 | 0.3 | 0.2 | 0   | 0.1 | 0.1 | 0.1 | 0.2 | 0.2 | 0.5 | 0.6 | 0.6 | 0.1 | 0.2 | 0.2 |     |   |
| 11_B : McF_6 : 0   | 1.4 | 1.3 | 1.5 | 1.1 | 1.1 | 1.3 | 1.4 | 1.1 | 1   | 0.8 | 0.7 | 0.9 | 0.1 | 0   | 0   | 0.1 | 0.1 | 0.2 | 0.2 | 0.3 | 0.1 | 0.2 | 0.2 | 0.2 | 0.1 | 0   | 0.2 | 0.2 | 0.2 | 0.6 | 0.5 | 0.5 | 0.2 | 0.2 | 0.2 |     |     |   |
| 11_B : McF_4 : Inf | 2.6 | 2   | 2.3 | 2.1 | 1.8 | 2.3 | 2.3 | 1.1 | 1.8 | 2.2 | 1.8 | 2.3 | 0   | 0   | 0   | 0   | 0   | 0   | 0   | 0   | 0   | 0   | 0   | 0   | 0   | 0   | 0   | 0   | 0   | 0   | 0   | 0   | 0   | 0   | 0   | 0   | 0   |   |
| 11_B : McF_4 : 0   | 2.2 | 1.8 | 2.4 | 2.4 | 2.4 | 2.1 | 1.6 | 1.5 | 1.6 | 1.9 | 1.9 | 1.8 | 0   | 0   | 0   | 0   | 0   | 0   | 0   | 0   | 0   | 0   | 0   | 0   | 0   | 0   | 0   | 0   | 0   | 0   | 0   | 0   | 0   | 0   | 0   | 0.1 | 0   |   |
| 11_B : exp : Inf   | 2.1 | 1.9 | 2.1 | 2.4 | 2.5 | 2.5 | 2.1 | 1.8 | 1.6 | 2.7 | 2.7 | 2.8 | 0   | 0.1 | 0   | 0   | 0.1 | 0   | 0   | 0.1 | 0   | 0   | 0.1 | 0   | 0   | 0.3 | 0   | 0   | 0.3 | 0   | 0   | 0.3 | 0   | 0   | 0   | 0.1 | 0   |   |
| 11_B : exp : 0     | 3.4 | 2.3 | 2.9 | 3.5 | 2.9 | 3.4 | 3.2 | 2.2 | 3.5 | 3.4 | 3.1 | 3.9 | 0   | 0   | 0   | 0   | 0   | 0   | 0   | 0   | 0   | 0   | 0   | 0   | 0   | 0.1 | 0   | 0   | 0   | 0   | 0   | 0.1 | 0   | 0   | 0   | 0   | 0   |   |
| 11_B : Bozic : Inf | 1.9 | 1.6 | 2.2 | 2.4 | 2.3 | 2.5 | 1.9 | 1.2 | 1.9 | 2.2 | 2.3 | 2.3 | 0   | 0.1 | 0   | 0   | 0.2 | 0   | 0   | 0.2 | 0   | 0   | 0.2 | 0   | 0   | 0.2 | 0   | 0.1 | 0.3 | 0.1 | 0   | 0.2 | 0   | 0.1 | 0.3 | 0.1 |     |   |
| 11_B : Bozic : 0   | 2.8 | 2.2 | 2.6 | 2.7 | 2.6 | 3.1 | 2.8 | 2.2 | 2.5 | 3.3 | 2.7 | 3.4 | 0   | 0.1 | 0   | 0   | 0.1 | 0   | 0   | 0.1 | 0   | 0   | 0.1 | 0   | 0   | 0.3 | 0   | 0   | 0.2 | 0   | 0   | 0.2 | 0   | 0   | 0.2 | 0   | 0   |   |
| 11_A : McF_6 : Inf | 1.7 | 1.3 | 1.7 | 0.7 | 0.9 | 0.8 | 1.2 | 1.2 | 1.7 | 0.9 | 0.6 | 0.7 | 0   | 0   | 0.1 | 0.1 | 0.2 | 0.1 | 0.2 | 0.3 | 0.2 | 0.2 | 0.3 | 0.2 | 0.1 | 0.1 | 0.1 | 0.1 | 0.2 | 0.1 | 0.6 | 0.6 | 0.6 | 0.1 | 0.2 | 0.1 |     |   |
| 11_A : McF_6 : 0   | 1.8 | 1.2 | 1.9 | 0.9 | 1   | 1.2 | 1.6 | 0.8 | 1.5 | 1.1 | 1.3 | 1.1 | 0   | 0   | 0   | 0.2 | 0.1 | 0.2 | 0.2 | 0.3 | 0.2 | 0.2 | 0.1 | 0.2 | 0.1 | 0   | 0.2 | 0.2 | 0.2 | 0.6 | 0.5 | 0.6 | 0.2 | 0.2 | 0.2 |     |     |   |
| 11_A : McF_4 : Inf | 2.1 | 1.8 | 2.2 | 2.2 | 1.9 | 1.9 | 1.8 | 1.5 | 1.7 | 1.7 | 1.8 | 2.3 | 0   | 0   | 0   | 0   | 0.1 | 0   | 0   | 0   | 0   | 0   | 0   | 0.1 | 0   | 0.1 | 0   | 0.1 | 0.1 | 0.1 | 0.1 | 0   | 0   | 0   | 0.1 | 0.1 | 0.1 |   |
| 11_A : McF_4 : 0   | 2.3 | 2.2 | 2.2 | 2.2 | 2.3 | 2.1 | 1.7 | 1.2 | 2   | 1.8 | 2   | 1.8 | 0   | 0   | 0   | 0   | 0   | 0   | 0   | 0   | 0   | 0   | 0   | 0   | 0   | 0.1 | 0   | 0   | 0.2 | 0.1 | 0   | 0.1 | 0   | 0   | 0.2 | 0.1 | 0   |   |
| 11_A : exp : Inf   | 1.9 | 1.8 | 2.1 | 2.7 | 2.3 | 2.6 | 2.2 | 1.8 | 2.1 | 2.7 | 2.2 | 2.5 | 0   | 0.1 | 0   | 0   | 0.2 | 0   | 0   | 0.1 | 0   | 0   | 0.2 | 0   | 0   | 0.3 | 0   | 0   | 0.4 | 0   | 0   | 0.3 | 0   | 0   | 0.4 | 0   | 0   |   |
| 11_A : exp : 0     | 2.7 | 2.7 | 3   | 3.5 | 3   | 3.4 | 3.2 | 2.2 | 2.7 | 3.8 | 3   | 3.8 | 0   | 0   | 0   | 0   | 0   | 0   | 0   | 0   | 0   | 0   | 0   | 0   | 0   | 0   | 0   | 0   | 0   | 0   | 0   | 0   | 0   | 0   | 0   | 0   | 0   |   |
| 11_A : Bozic : Inf | 1.7 | 1.2 | 2   | 2.4 | 2.5 | 2.8 | 2.2 | 1.5 | 1.7 | 2.5 | 2.1 | 2.6 | 0   | 0.1 | 0   | 0   | 0.2 | 0   | 0   | 0.1 | 0   | 0   | 0.2 | 0   | 0   | 0.2 | 0   | 0.1 | 0.3 | 0.2 | 0   | 0.2 | 0   | 0.1 | 0.3 | 0.2 |     |   |
| 11_A : Bozic : 0   | 2.7 | 2   | 2.5 | 3.2 | 2.6 | 3.4 | 2.4 | 1.8 | 2.4 | 3.2 | 2.9 | 3.3 | 0   | 0.1 | 0   | 0   | 0.1 | 0   | 0   | 0.1 | 0   | 0   | 0.1 | 0   | 0   | 0.2 | 0   | 0   | 0.1 | 0   | 0   | 0.2 | 0   | 0   | 0.1 | 0   | 0   |   |
| 9_B : McF_6 : Inf  | 1.3 | 1.3 | 1.4 | 0.8 | 0.4 | 0.5 | 0.5 | 0.9 | 0.5 | 0.8 | 0.4 | 0.9 | 0   | 0   | 0   | 0   | 0   | 0   | 0   | 0.1 | 0   | 0   | 0   | 0   | 0   | 0   | 0   | 0   | 0   | 0   | 0.6 | 0.6 | 0.6 | 0   | 0   | 0   |     |   |
| 9_B : McF_6 : 0    | 1.1 | 1.3 | 1.3 | 0.8 | 0.3 | 0.9 | 0.5 | 1   | 0.6 | 0.8 | 0.3 | 0.5 | 0   | 0   | 0   | 0   | 0   | 0   | 0   | 0   | 0   | 0   | 0   | 0   | 0   | 0   | 0   | 0   | 0   | 0   | 0.6 | 0.6 | 0.6 | 0   | 0   | 0   |     |   |
| 9_B : McF_4 : Inf  | 1.9 | 1.6 | 2.1 | 1.7 | 1.7 | 1.4 | 1.3 | 1.2 | 2.1 | 1.5 | 1.3 | 1.4 | 0   | 0   | 0   | 0   | 0   | 0   | 0   | 0   | 0   | 0   | 0   | 0   | 0   | 0   | 0   | 0   | 0   | 0   | 0   | 0   | 0   | 0   | 0   | 0   | 0   |   |
| 9_B : McF_4 : 0    | 2.2 | 1.6 | 1.7 | 1.8 | 1.7 | 1.6 | 1.6 | 1.4 | 1.5 | 1.6 | 1.7 | 1.6 | 0   | 0   | 0   | 0   | 0   | 0   | 0   | 0   | 0   | 0   | 0   | 0   | 0   | 0   | 0   | 0   | 0   | 0   | 0   | 0   | 0   | 0   | 0   | 0   | 0   |   |
| 9_B : exp : Inf    | 2.1 | 1.3 | 2.1 | 2.6 | 2.6 | 2.6 | 1.7 | 1.4 | 1.7 | 2.5 | 2.5 | 2.5 | 0   | 0.2 | 0   | 0   | 0.1 | 0   | 0   | 0.2 | 0   | 0   | 0.1 | 0   | 0   | 0.4 | 0   | 0   | 0.3 | 0   | 0   | 0.5 | 0   | 0   | 0.3 | 0   | 0   |   |
| 9_B : exp : 0      | 2.7 | 2.3 | 2.6 | 3.3 | 2.6 | 3.1 | 2.7 | 2.1 | 2.6 | 3.1 | 2.5 | 3.3 | 0   | 0   | 0   | 0   | 0   | 0   | 0   | 0   | 0   | 0   | 0   | 0   | 0   | 0   | 0   | 0   | 0   | 0   | 0   | 0   | 0   | 0   | 0   | 0   | 0   |   |
| 9_B : Bozic : Inf  | 1.7 | 1.6 | 1.9 | 2.1 | 2   | 2.4 | 1.6 | 1.2 | 1.1 | 2.2 | 1.5 | 1.7 | 0   | 0.1 | 0   | 0   | 0.3 | 0   | 0   | 0.2 | 0   | 0   | 0.3 | 0   | 0   | 0.3 | 0   | 0   | 0.3 | 0.2 | 0   | 0.3 | 0   | 0   | 0.3 | 0.2 | 0   |   |
| 9_B : Bozic : 0    | 2.5 | 1.9 | 2.3 | 2.9 | 2.1 | 3   | 2.1 | 1.7 | 2.5 | 2.8 | 2.5 | 3.2 | 0   | 0.2 | 0   | 0   | 0   | 0   | 0   | 0.2 | 0   | 0   | 0   | 0   | 0   | 0.2 | 0   | 0   | 0.2 | 0   | 0   | 0.2 | 0   | 0   | 0.2 | 0   | 0   |   |
| 9_A : McF_6 : Inf  | 1   | 0.9 | 1.3 | 0.5 | 0.5 | 0.5 | 0.9 | 0.9 | 0.9 | 0.5 | 0.7 | 0.6 | 0   | 0   | 0   | 0   | 0   | 0   | 0   | 0.5 | 0   | 0   | 0.1 | 0   | 0   | 0   | 0   | 0   | 0   | 0.5 | 0.5 | 0.5 | 0   | 0   | 0   | 0   |     |   |
| 9_A : McF_6 : 0    | 0.9 | 1   | 1   | 0.5 | 0.5 | 0.7 | 0.7 | 0.9 | 0.7 | 0.5 | 0.7 | 0.7 | 0   | 0   | 0   | 0   | 0   | 0   | 0   | 0.3 | 0   | 0   | 0   | 0   | 0   | 0   | 0   | 0   | 0   | 0.5 | 0.5 | 0.5 | 0.1 | 0   | 0   | 0   |     |   |
| 9_A : McF_4 : Inf  | 1.8 | 1.7 | 1.8 | 1.4 | 1.5 | 1.6 | 1.1 | 1.2 | 1.4 | 1.5 | 1.2 | 1.8 | 0   | 0   | 0   | 0   | 0   | 0   | 0   | 0.2 | 0   | 0   | 0   | 0   | 0   | 0   | 0   | 0   | 0   | 0.5 | 0   | 0   | 0   | 0   | 0   | 0   |     |   |
| 9_A : McF_4 : 0    | 1.8 | 1.5 | 1.7 | 1.4 | 1.6 | 1.4 | 1.7 | 1.6 | 1.4 | 1.6 | 1.7 | 1.6 | 0   | 0   | 0   | 0   | 0   | 0   | 0   | 0   | 0   | 0   | 0   | 0   | 0   | 0   | 0   | 0   | 0   | 0   | 0   | 0   | 0   | 0   | 0   | 0   | 0   |   |
| 9_A : exp : Inf    | 1.9 | 1.5 | 1.6 | 2.4 | 2.1 | 2.4 | 1.6 | 1.2 | 1.2 | 2.5 | 2.2 | 2.1 | 0   | 0   | 0   | 0   | 0   | 0   | 0   | 0.1 | 0   | 0   | 0   | 0   | 0   | 0.2 | 0   | 0   | 0.2 | 0   | 0   | 0.2 | 0   | 0   | 0.2 | 0   | 0   |   |
| 9_A : exp : 0      | 2.4 | 2   | 2.5 | 2.8 | 2.7 | 2.8 | 2.6 | 1.9 | 2.6 | 2.9 | 2.6 | 2.8 | 0   | 0   | 0   | 0   | 0   | 0   | 0   | 0   | 0   | 0   | 0   | 0   | 0   | 0   | 0   | 0   | 0   | 0   | 0   | 0   | 0   | 0   | 0   | 0   | 0   |   |
| 9_A : Bozic : Inf  | 1.3 | 1   | 1.6 | 2.4 | 1.7 | 2.3 | 1.3 | 1.1 | 1.3 | 2.1 | 2   | 1.8 | 0   | 0   | 0   | 0   | 0   | 0   | 0   | 0   | 0   | 0   | 0   | 0.1 | 0   | 0   | 0.1 | 0   | 0   | 0   | 0   | 0   | 0.1 | 0   | 0   | 0   | 0   | 0 |
| 9_A : Bozic : 0    | 2.1 | 1.8 | 2.2 | 2.5 | 2.1 | 2.6 | 2.4 | 1.9 | 2.5 | 2.8 | 2.3 | 2.8 | 0   | 0   | 0   | 0   | 0   | 0   | 0   | 0   | 0   | 0   | 0   | 0   | 0   | 0   | 0   | 0   | 0   | 0   | 0   | 0   | 0   | 0   | 0   | 0   | 0   |   |
| 7_B : McF_6 : Inf  | 1.2 | 1.5 | 0.9 | 0   | 0   | 0   | 0.7 | 1   | 1.2 | 0   | 0   | 0   | 0   | 0   | 0   | 0.1 | 0.1 | 0   | 0.9 | 0   | 0.3 | 0.3 | 0.3 | 0   | 0   | 0   | 0.3 | 0.6 | 0.3 | 0   | 0   | 0   | 0   | 0   | 0.3 | 0.6 | 0.3 |   |
| 7_B : McF_6 : 0    | 0.9 | 1.2 | 0.9 | 0   | 0   | 0   | 0.6 | 0.9 | 0.6 | 0   | 0   | 0   | 0   | 0   | 0   | 0   | 0.1 | 0   | 0.9 | 0   | 0.3 | 0.3 | 0.3 | 0   | 0   | 0   | 0.3 | 0.3 | 0.3 | 0   | 0   | 0   | 0   | 0   | 0.3 | 0.3 | 0.3 |   |
| 7_B : McF_4 : Inf  | 0.9 | 0.9 | 0.9 | 0.9 | 0.9 | 0.9 | 1.2 | 0.9 | 0.9 | 0.9 | 0.9 | 0.9 | 0   | 0   | 0   | 0   | 0   | 0   | 0   | 0   | 0   | 0   | 0   | 0   | 0   | 0   | 0   | 0   | 0   | 0.3 | 0   | 0   | 0   | 0   | 0   | 0.3 | 0   |   |
| 7_B : McF_4 : 0    | 0.9 | 0.9 | 1   | 0.9 | 0.9 | 0.9 | 0.9 | 0.6 | 0.9 | 0.9 | 1   | 0.9 | 0   | 0   | 0   | 0   | 0   | 0   | 0   | 0   | 0   | 0   | 0   | 0   | 0   | 0   | 0   | 0   | 0   | 0   | 0   | 0   | 0   | 0   | 0   | 0   | 0   |   |
| 7_B : exp : Inf    | 1   | 0.7 | 1   | 2.1 | 2.1 | 1.8 | 1.3 | 0.9 | 1.2 | 1.8 | 2.1 | 1.6 | 0   | 0   | 0   | 0   | 0   | 0   | 0   | 0   | 0   | 0   | 0   | 0   | 0.6 | 0   | 0.3 | 1.6 | 0   | 0   | 0.6 | 0   | 0   | 0.3 | 1.6 | 0   | 0   |   |
| 7_B : exp : 0      | 1.9 | 1.6 | 2.5 | 2.5 | 2.6 | 3.2 | 2.1 | 1.5 | 2.1 | 2.8 | 2.4 | 3.2 | 0   | 0   | 0   | 0   | 0   | 0   | 0   | 0   | 0   | 0   | 0   | 0   | 0.3 | 0   | 0   | 0.3 | 0   | 0   | 0.3 | 0   | 0   | 0   | 0.3 | 0   | 0   |   |
| 7_B : Bozic : Inf  | 1   | 0.4 | 0.9 | 1.2 | 2.4 | 1.5 | 0.9 | 0.4 | 0.7 | 1.3 | 2.1 | 1.2 | 0   | 0.3 | 0   | 0.1 | 1.2 | 0   | 0   | 0.9 | 0   | 0.3 | 1.2 | 0   | 0   | 0.6 | 0   | 0.6 | 1.6 | 0.6 | 0   | 0.6 | 0   | 0.6 | 1.6 | 0.6 |     |   |
| 7_B : Bozic : 0    | 1.3 | 1.2 | 1   | 2.4 | 2.1 | 2.4 | 1.9 | 0.9 | 1.6 | 2.2 | 1.8 | 2.6 | 0   | 0   | 0   | 0   | 0.6 | 0   | 0   | 0   | 0   | 0   | 0.7 | 0   | 0   | 0   | 0   | 0   | 1.2 | 0   | 0   | 0   | 0   | 0   | 1.2 | 0   | 0   |   |
| 7_A : McF_6 : Inf  | 1.3 | 1.8 | 1.1 | 0   | 0   | 0   | 1.3 | 1.1 | 1.3 | 0   | 0   | 0   | 0   | 0   | 0   | 0   | 0   | 0   | 0   | 0.6 | 0   | 0   | 0   | 0   | 0   | 0   | 0.3 | 0.3 | 0.3 | 0   | 0   | 0   | 0   | 0   | 0.3 | 0.3 | 0.3 |   |
| 7_A : McF_6 : 0    | 1.3 | 1.9 | 1.3 | 0   | 0   | 0   | 1.5 | 1.1 | 1.6 | 0   | 0   | 0   | 0   | 0   | 0   | 0   | 0   | 0   | 0   | 0.6 | 0   | 0   | 0   | 0   | 0   | 0   | 0.5 | 0.6 | 0.3 | 0   | 0   | 0   | 0   | 0   | 0.5 | 0.6 | 0.3 |   |
| 7_A : McF_4 : Inf  | 1   | 1   | 1   | 1.3 | 1   | 1   | 1   | 0.6 | 1   | 1   | 1   | 1.1 | 0   | 0   | 0   | 0   | 0   | 0   | 0   | 0   | 0   | 0   | 0   | 0   | 0   | 0   | 0   | 0   | 0   | 0   | 0   | 0   | 0   | 0   | 0   | 0   | 0   |   |
| 7_A : McF_4 : 0    | 1   | 0.8 | 1   | 1   | 1   | 1.1 | 0.6 | 0.6 | 1   | 1   | 1   | 1.1 | 0   | 0   | 0   | 0   | 0   | 0   | 0   | 0   | 0   | 0   | 0   | 0   | 0   | 0   | 0   | 0   | 0   | 0   | 0   | 0   | 0   | 0   | 0   | 0   | 0   |   |
| 7_A : exp : Inf    | 1   | 1   | 1   | 1.3 | 1.9 | 1   | 1   | 0.8 | 0.6 | 1.3 | 1.9 | 1.3 | 0   | 0   | 0   | 0   | 0   | 0   | 0   | 0   | 0   | 0   | 0   | 0   | 0   | 0.2 | 0.3 | 1.3 | 0.3 | 0   | 0.2 | 0   | 0   | 0.3 | 1.3 | 0.3 | 0   |   |
| 7_A : exp : 0      | 1.8 | 1.3 |     |     |     |     |     |     |     |     |     |     |     |     |     |     |     |     |     |     |     |     |     |     |     |     |     |     |     |     |     |     |     |     |     |     |     |   |

### **3 Drivers Unknown**

#### **3.1 Inferred edges, Drivers Unknown**

















### 3.2 Diff, Drivers Unknown







S.Time = last. Diff; N = 200

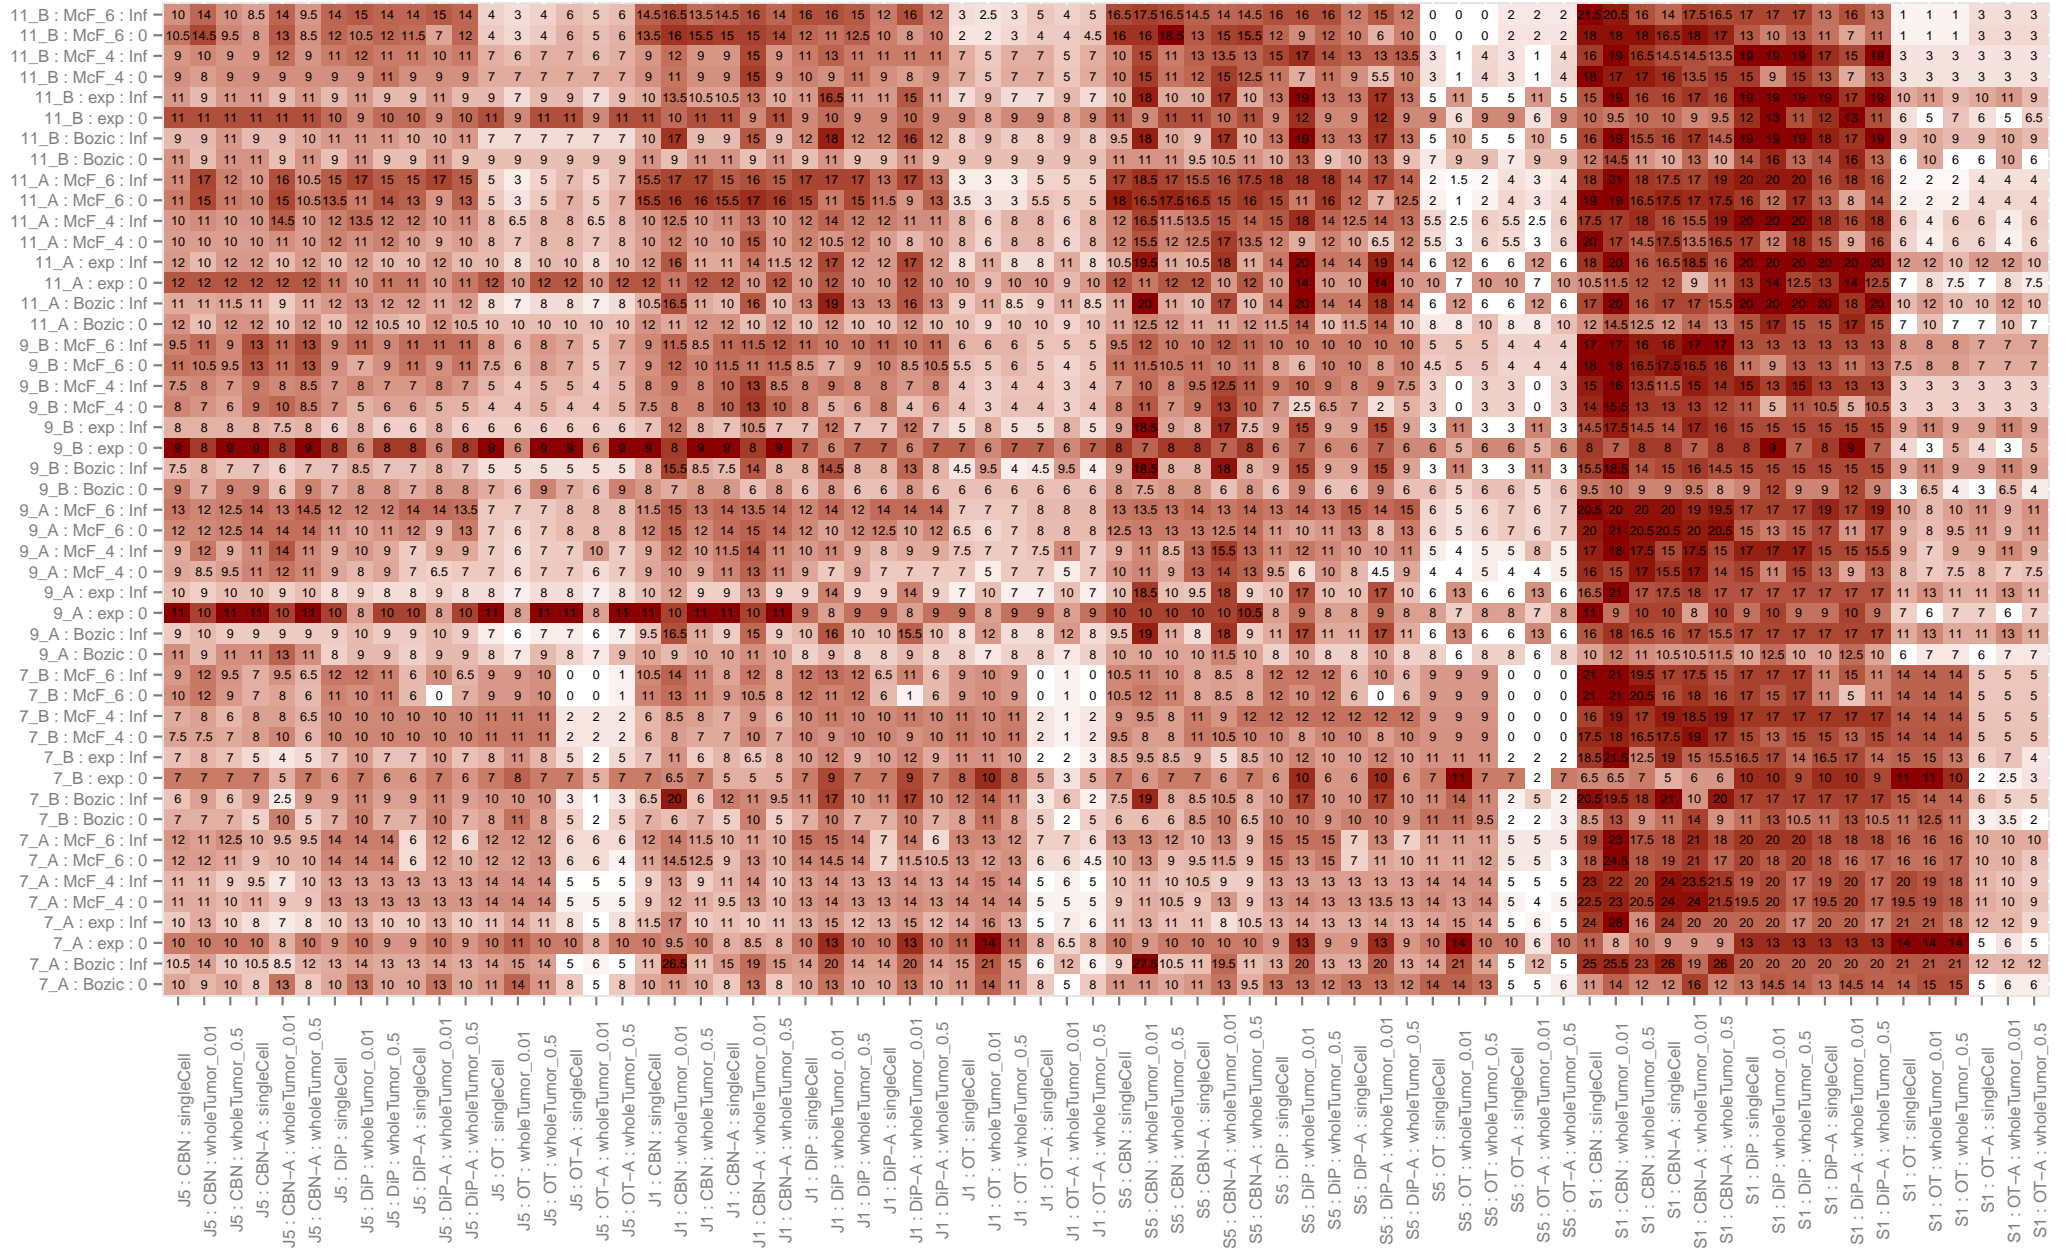

Figure 24: Drivers Unknown, Diff, N = 200, S.Time = last





S.Time = unif. Diff; N = 100

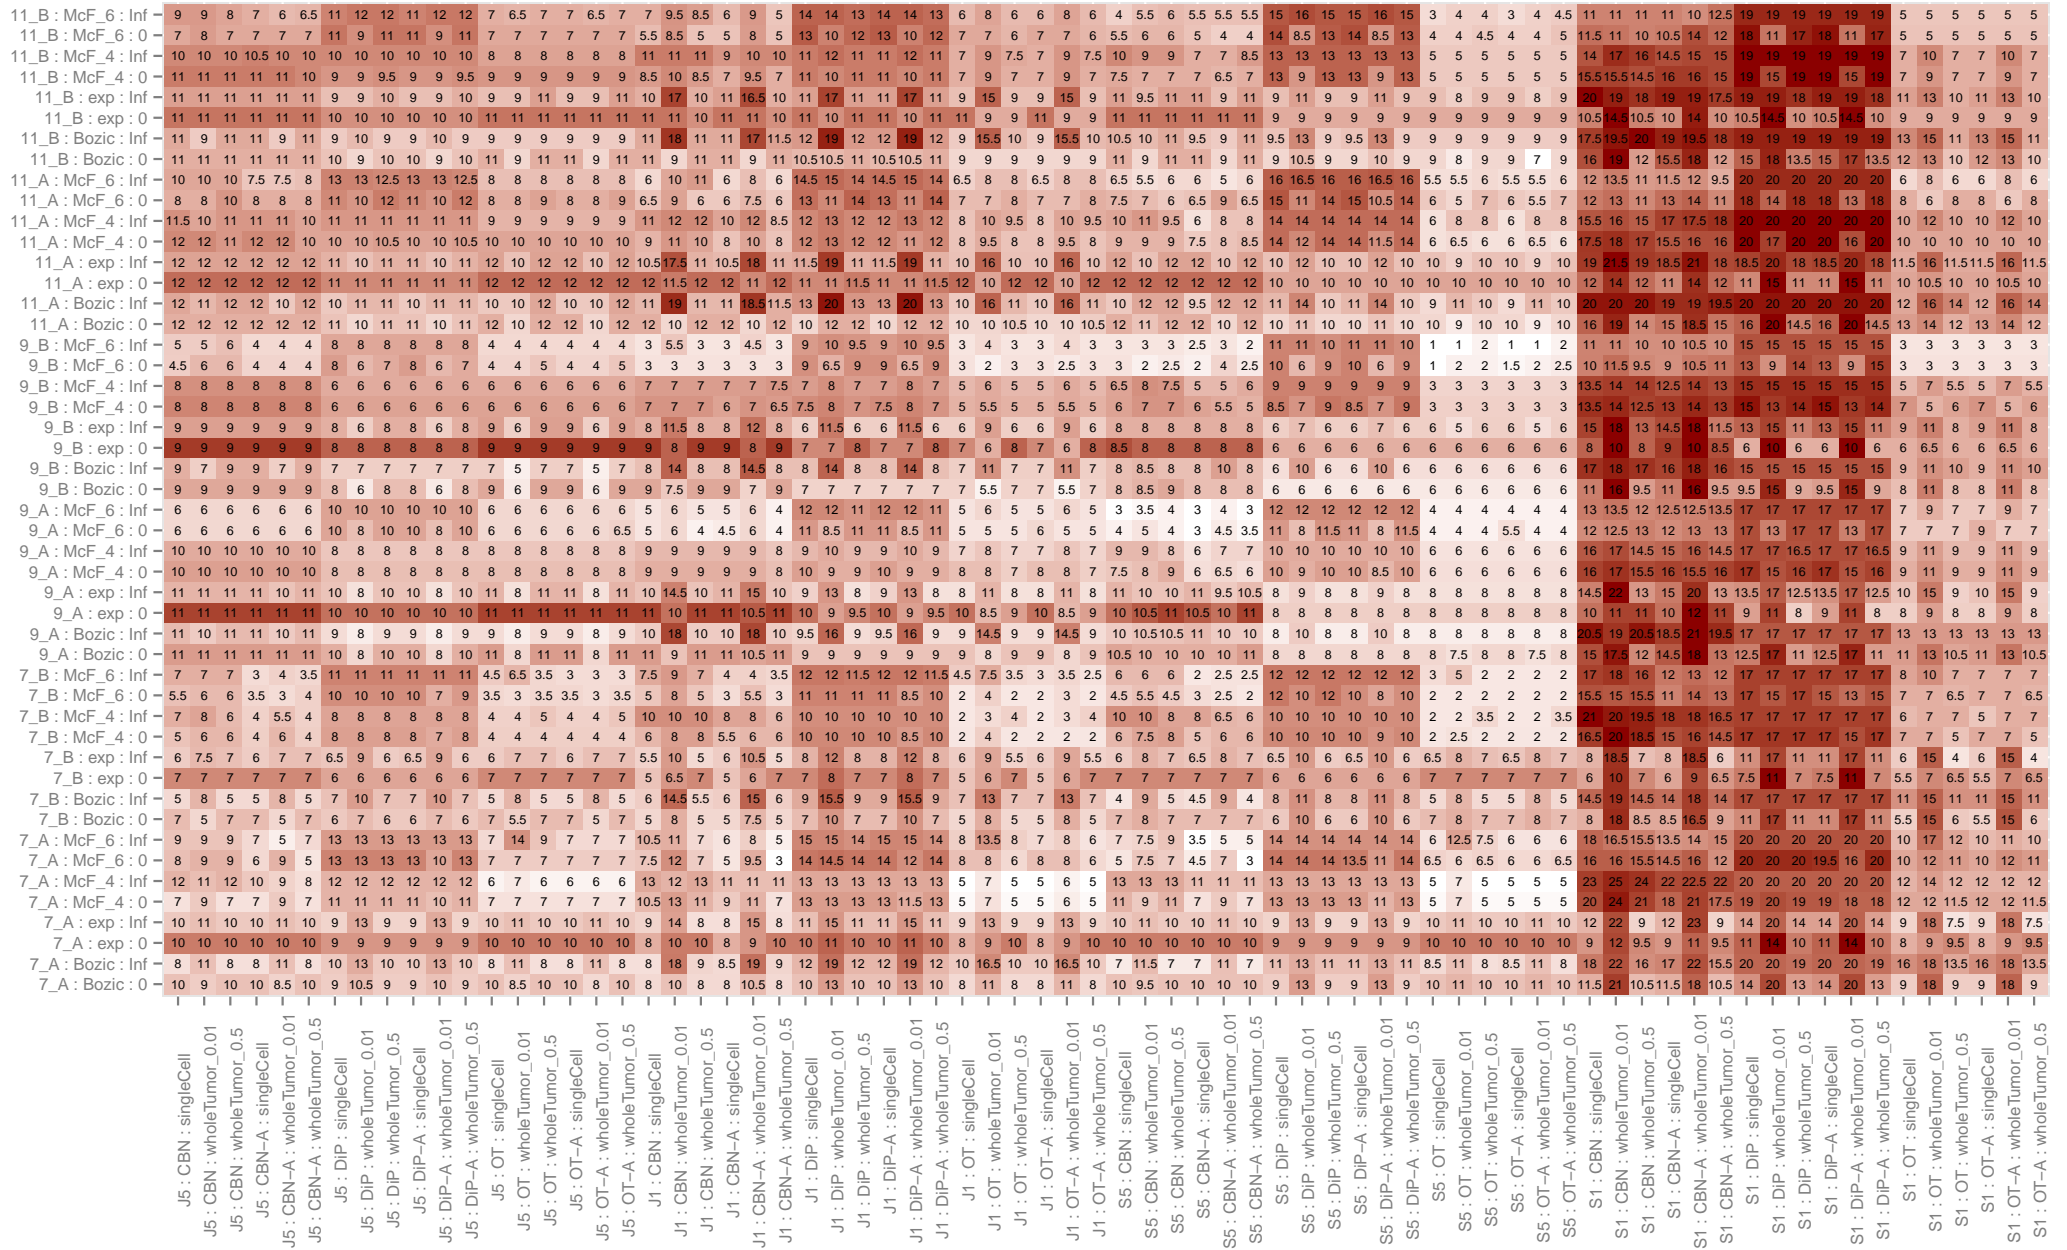

Figure 27: Drivers Unknown, Diff, N = 100, S.Time = unif.

### 3.3 PFD, Drivers Unknown



S.Time = last. PFD; N = 1000

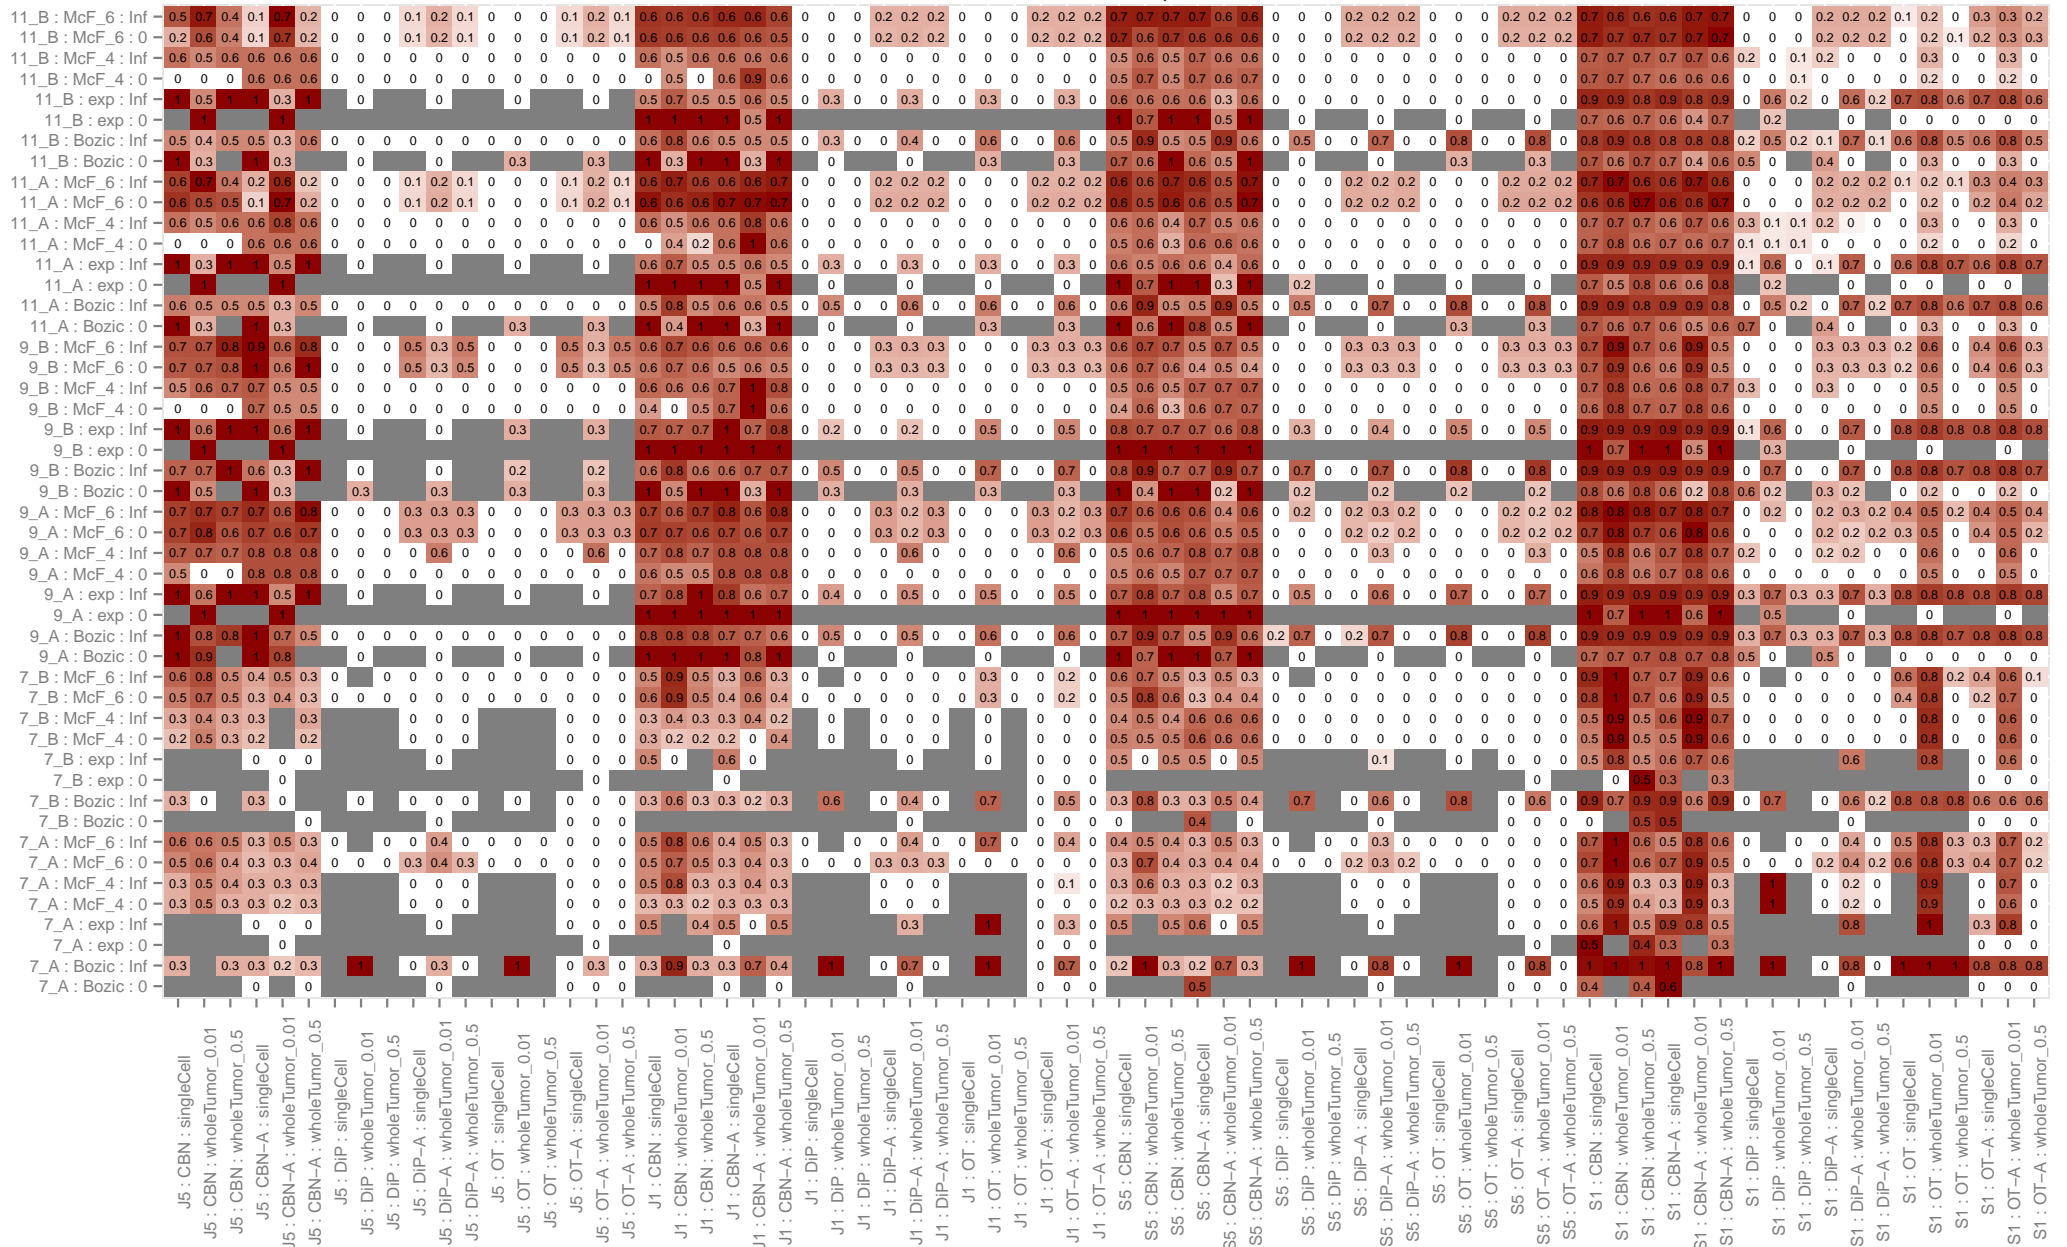

Figure 28: Drivers Unknown, PFD, N = 1000, S.Time = last

S.Time = unif. PFD; N = 1000

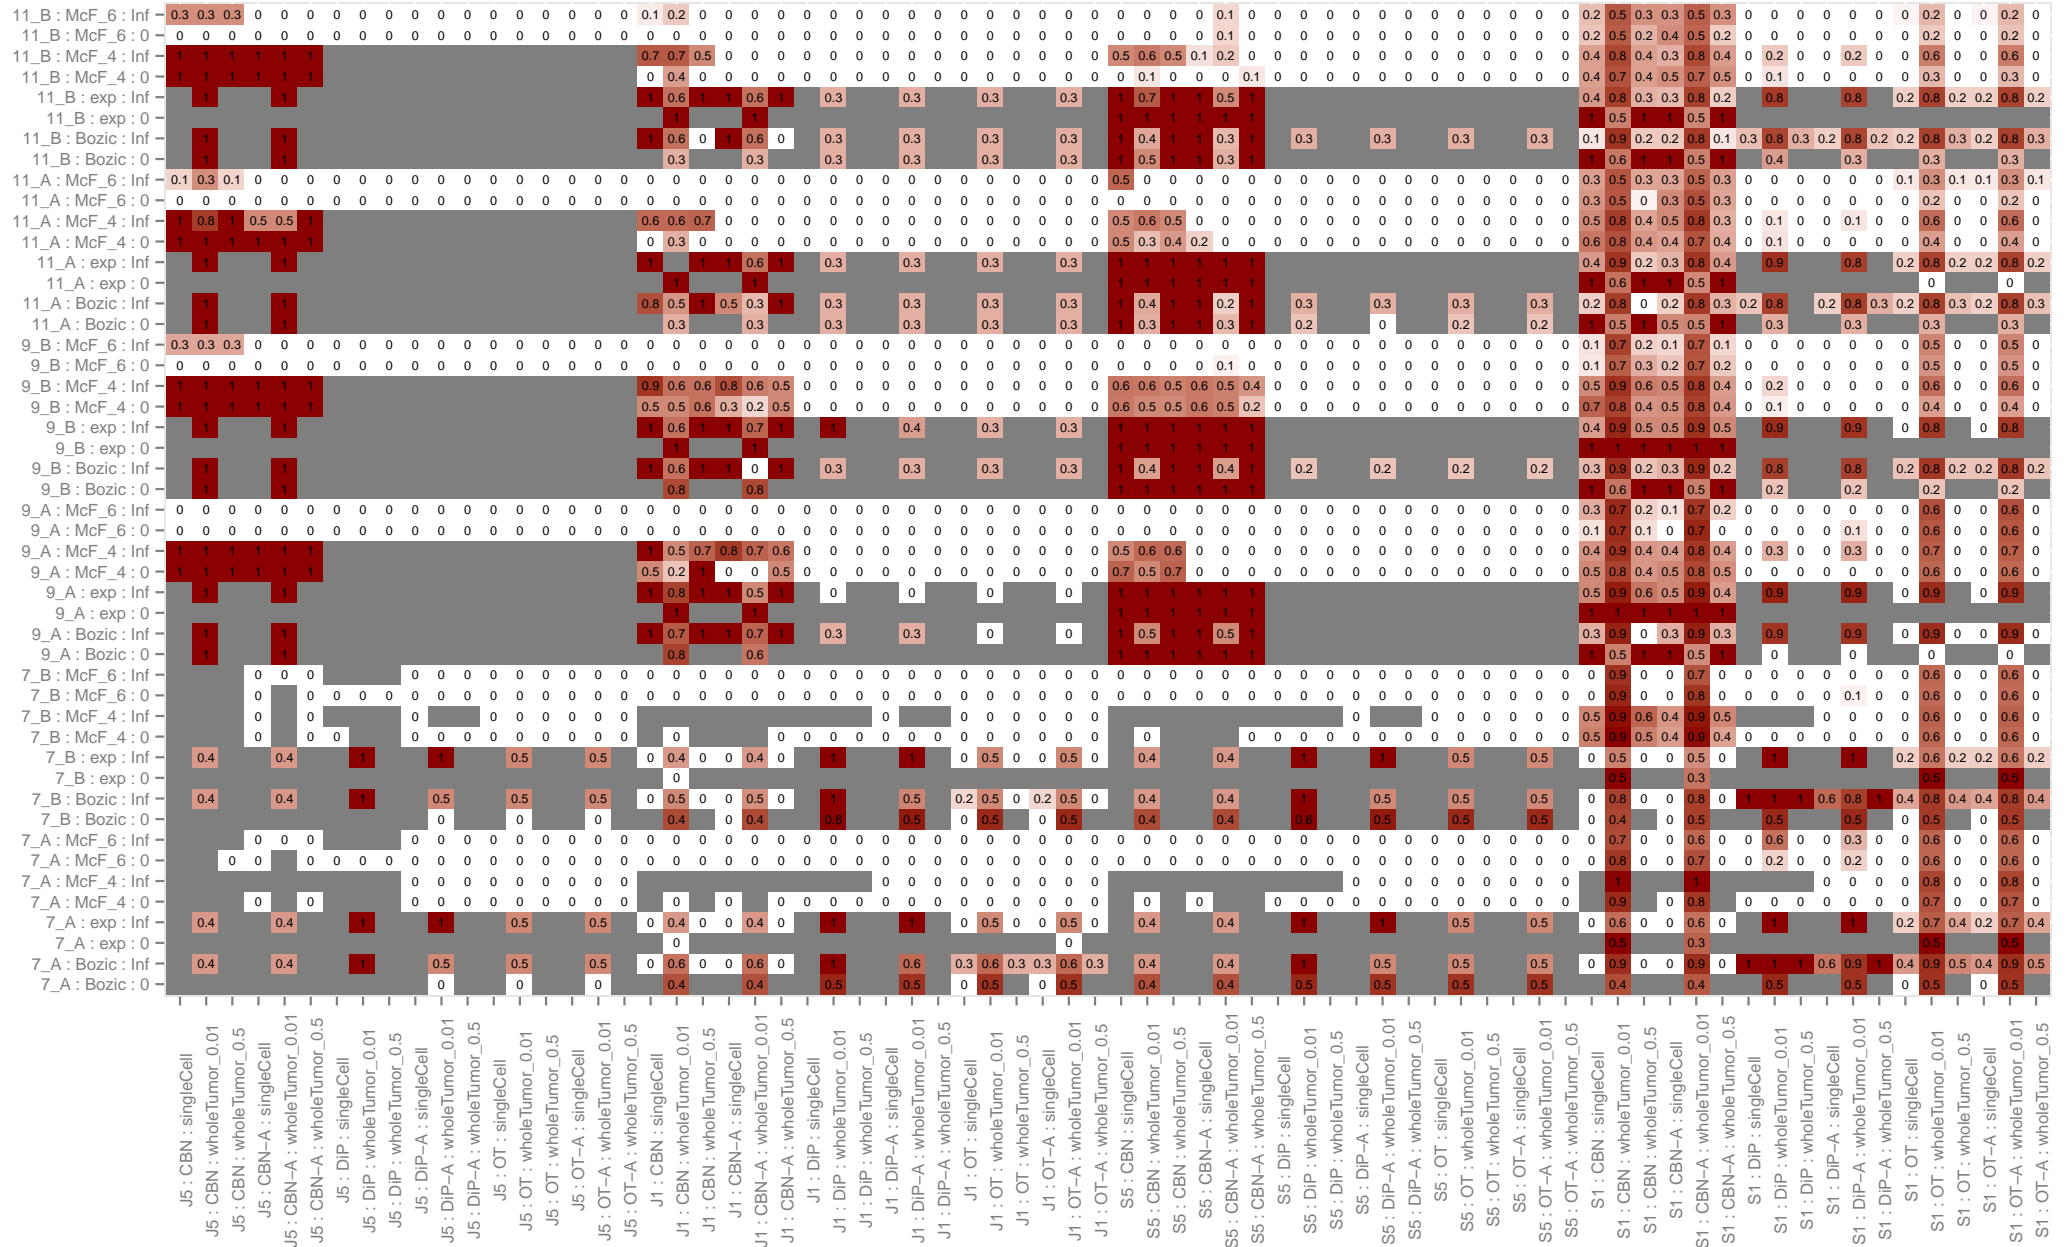

Figure 29: Drivers Unknown, PFD, N = 1000, S.Time = unif.



S.Time = last. PFD; N = 200

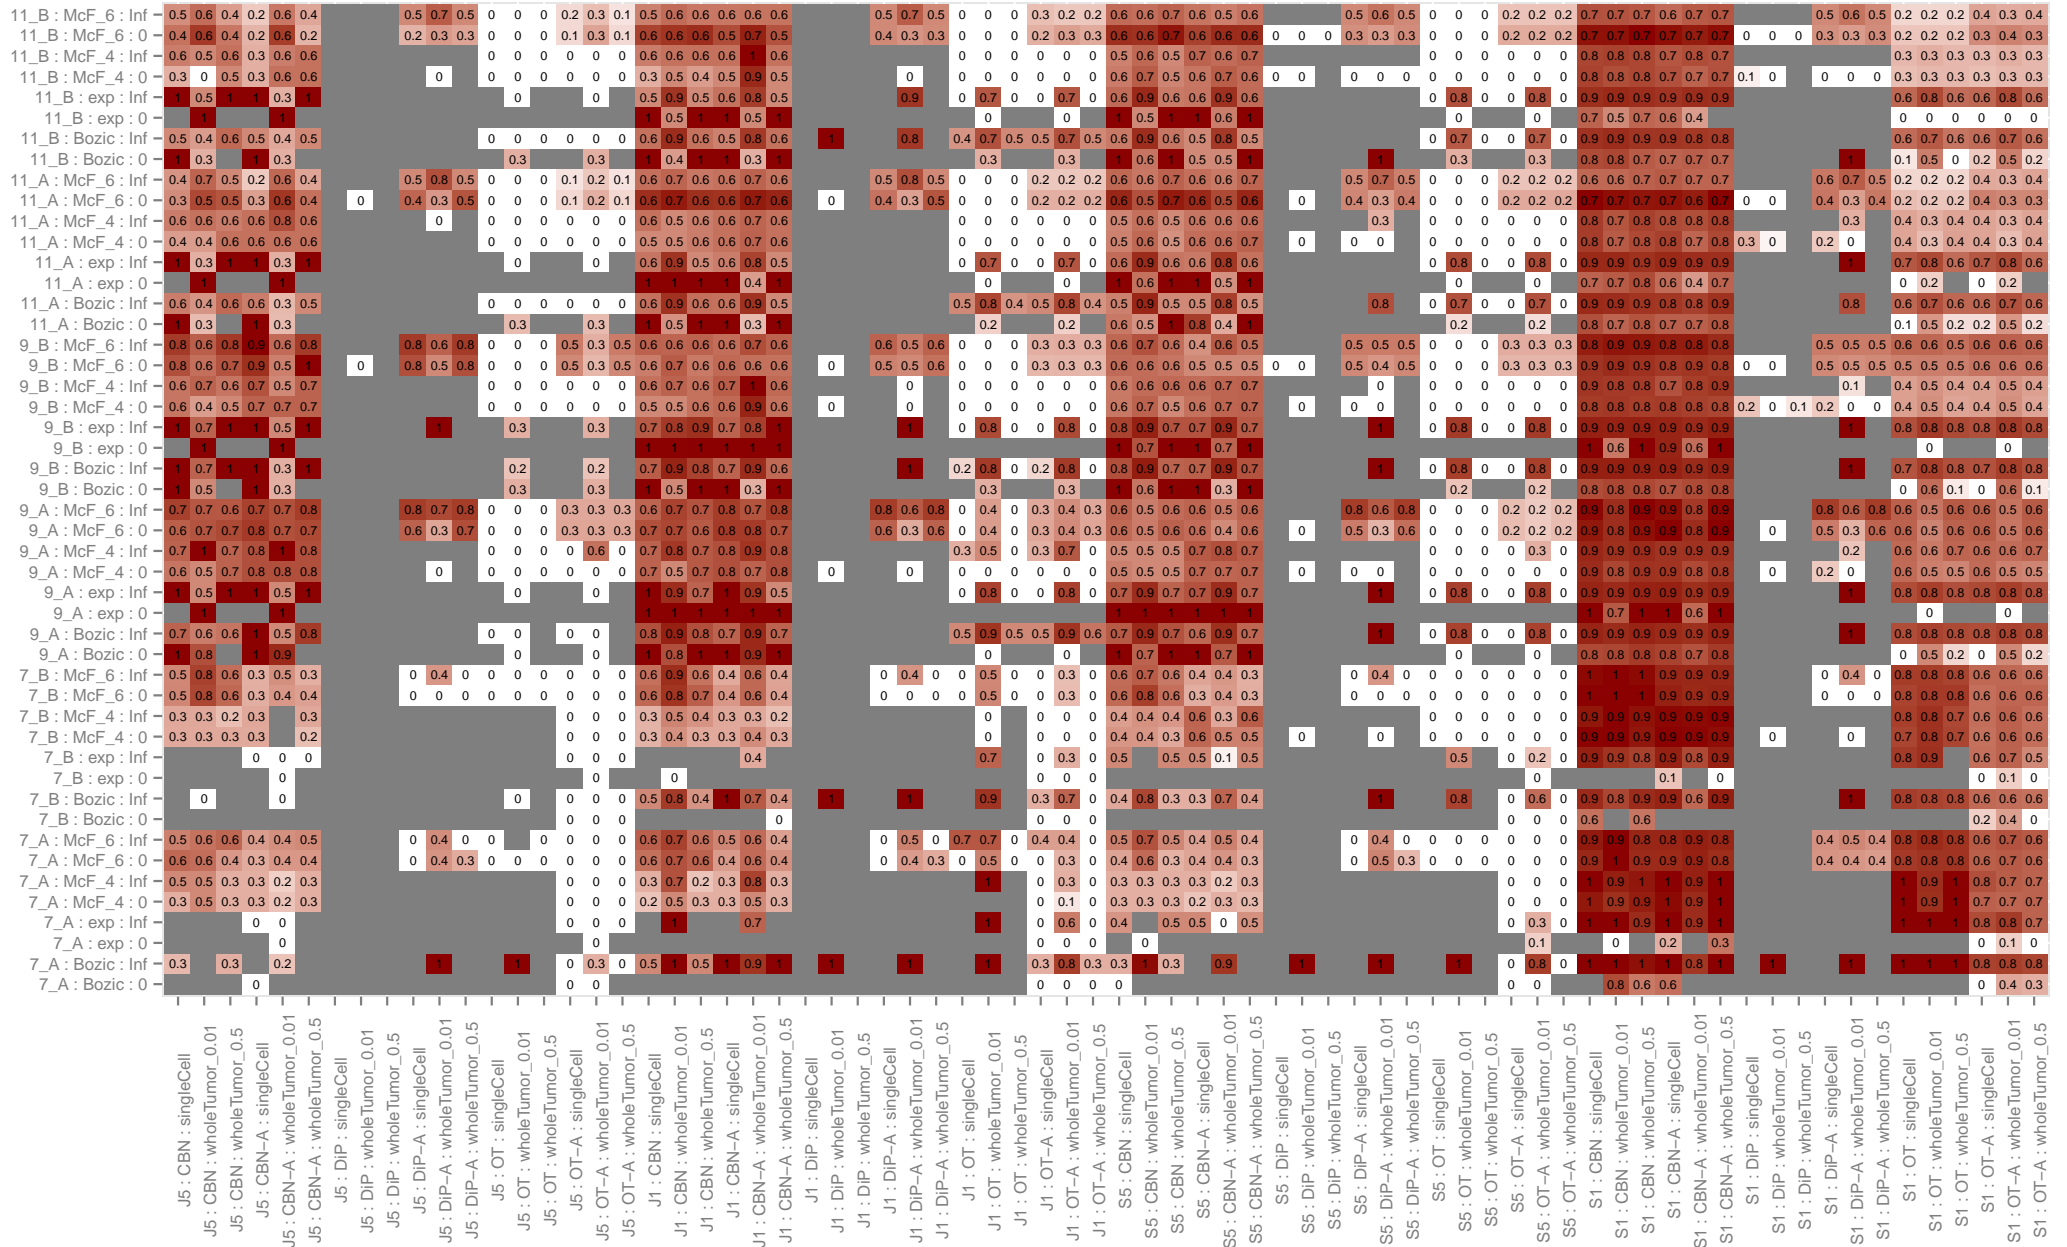

Figure 30: Drivers Unknown, PFD, N = 200, S.Time = last

S.Time = unif. PFD; N = 200

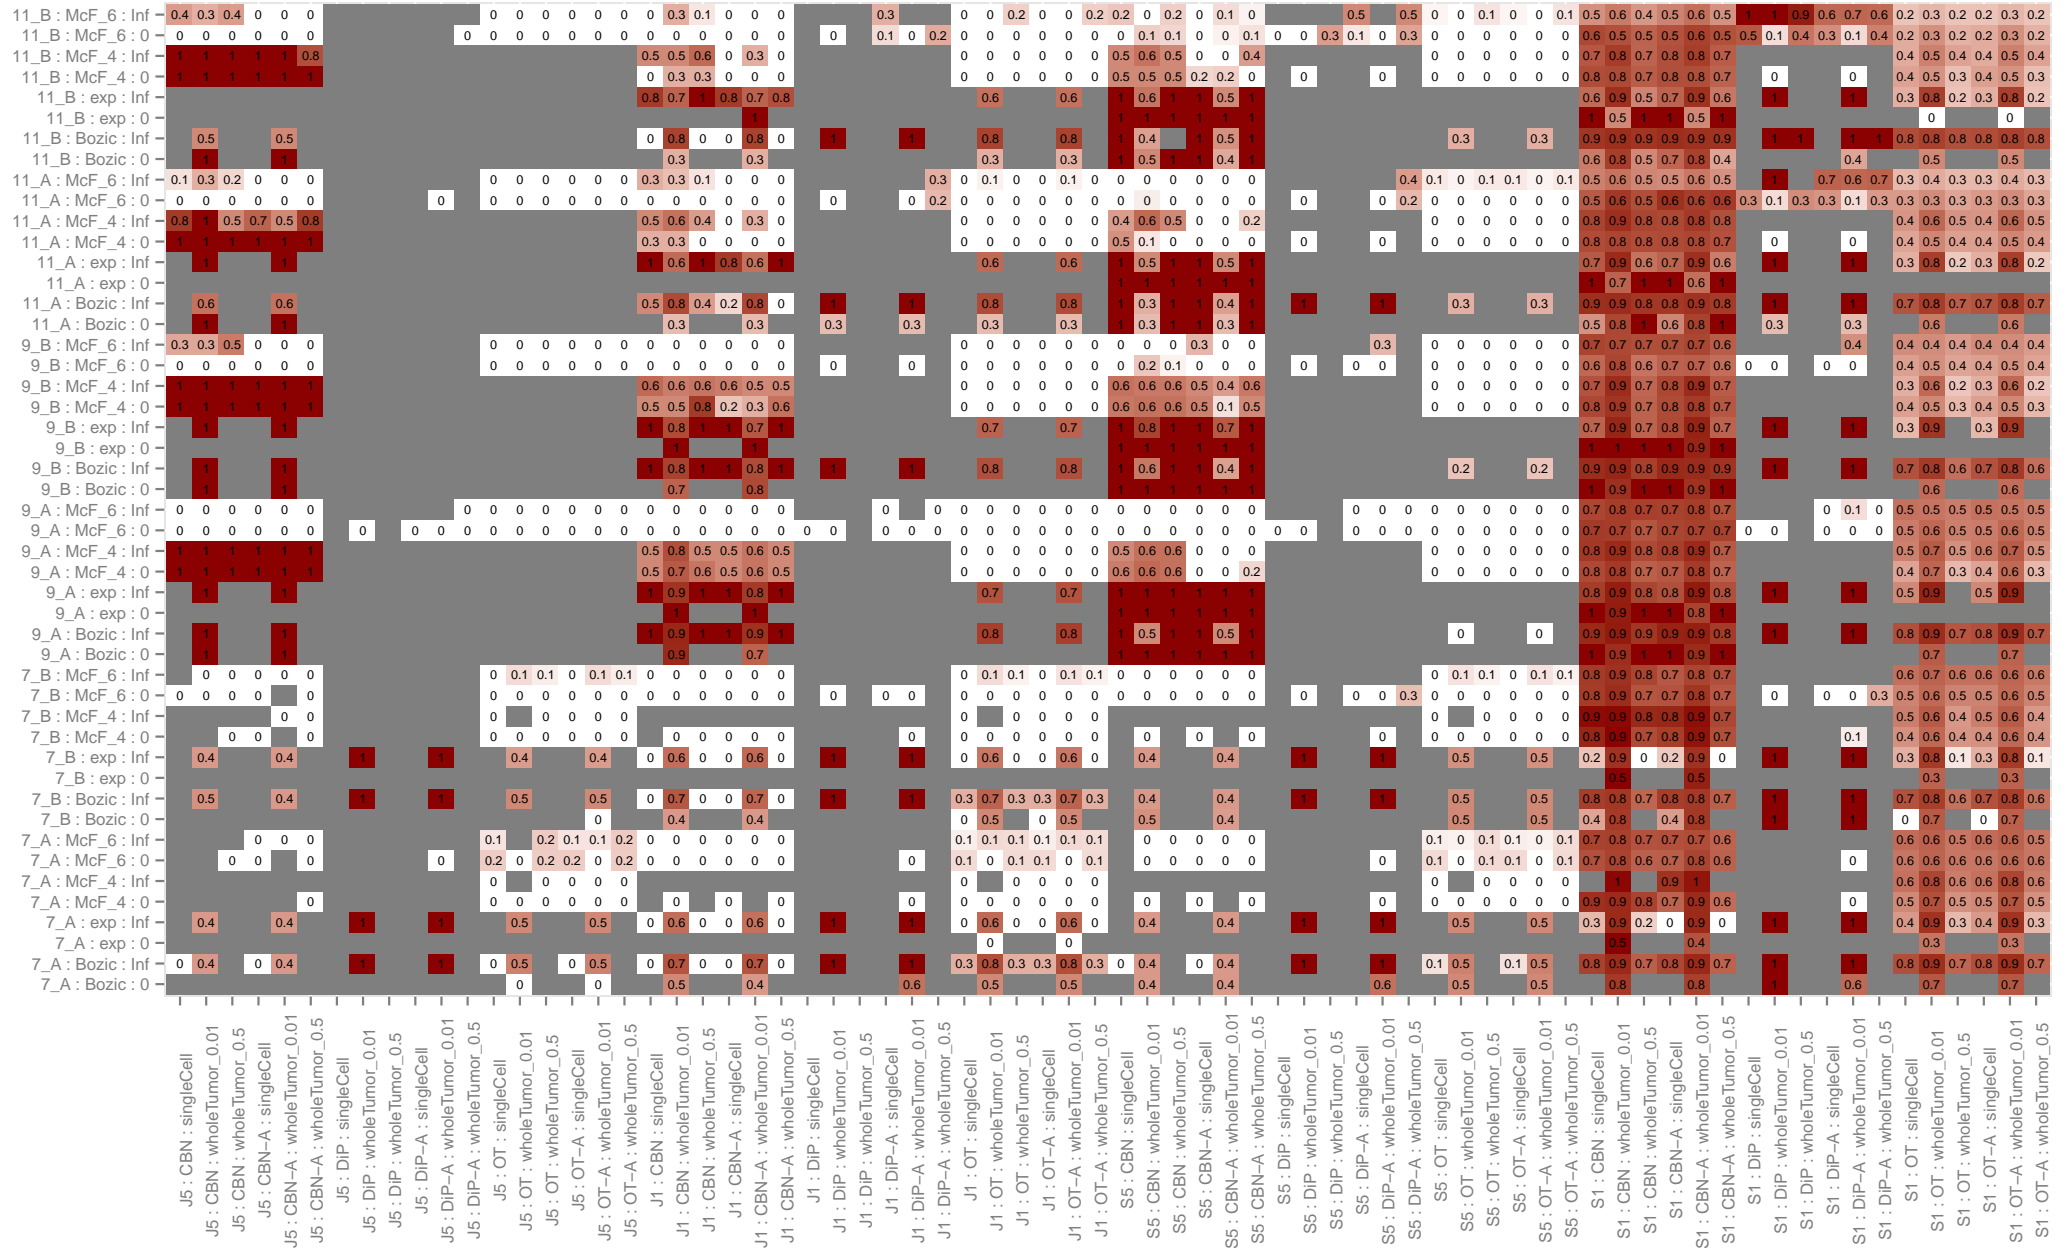

Figure 31: Drivers Unknown, PFD, N = 200, S.Time = unif.

S.Time = last. PFD; N = 100

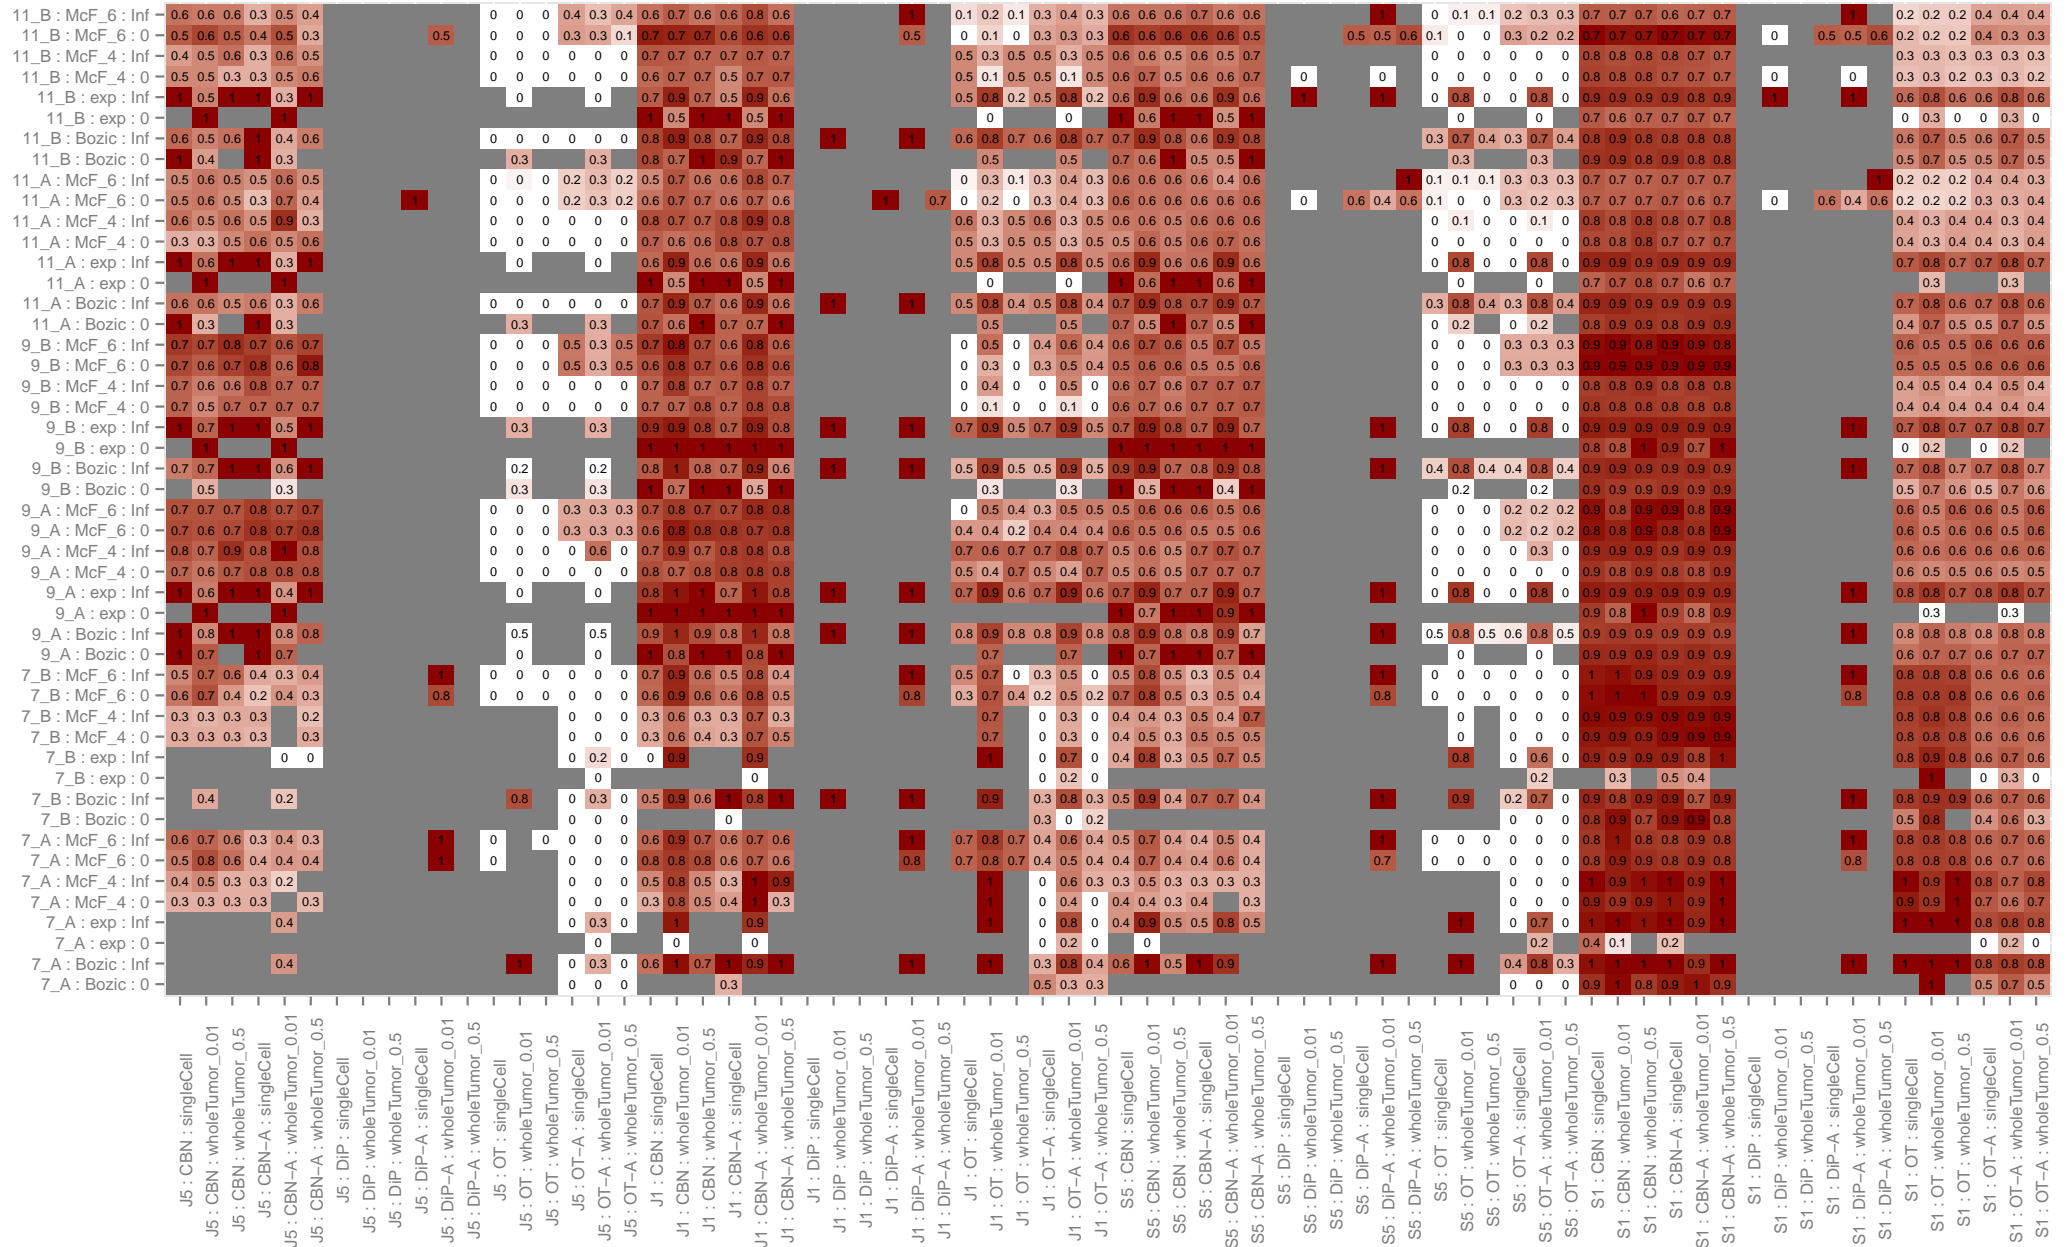

Figure 32: Drivers Unknown, PFD, N = 100, S.Time = last

S.Time = unif. PFD; N = 100

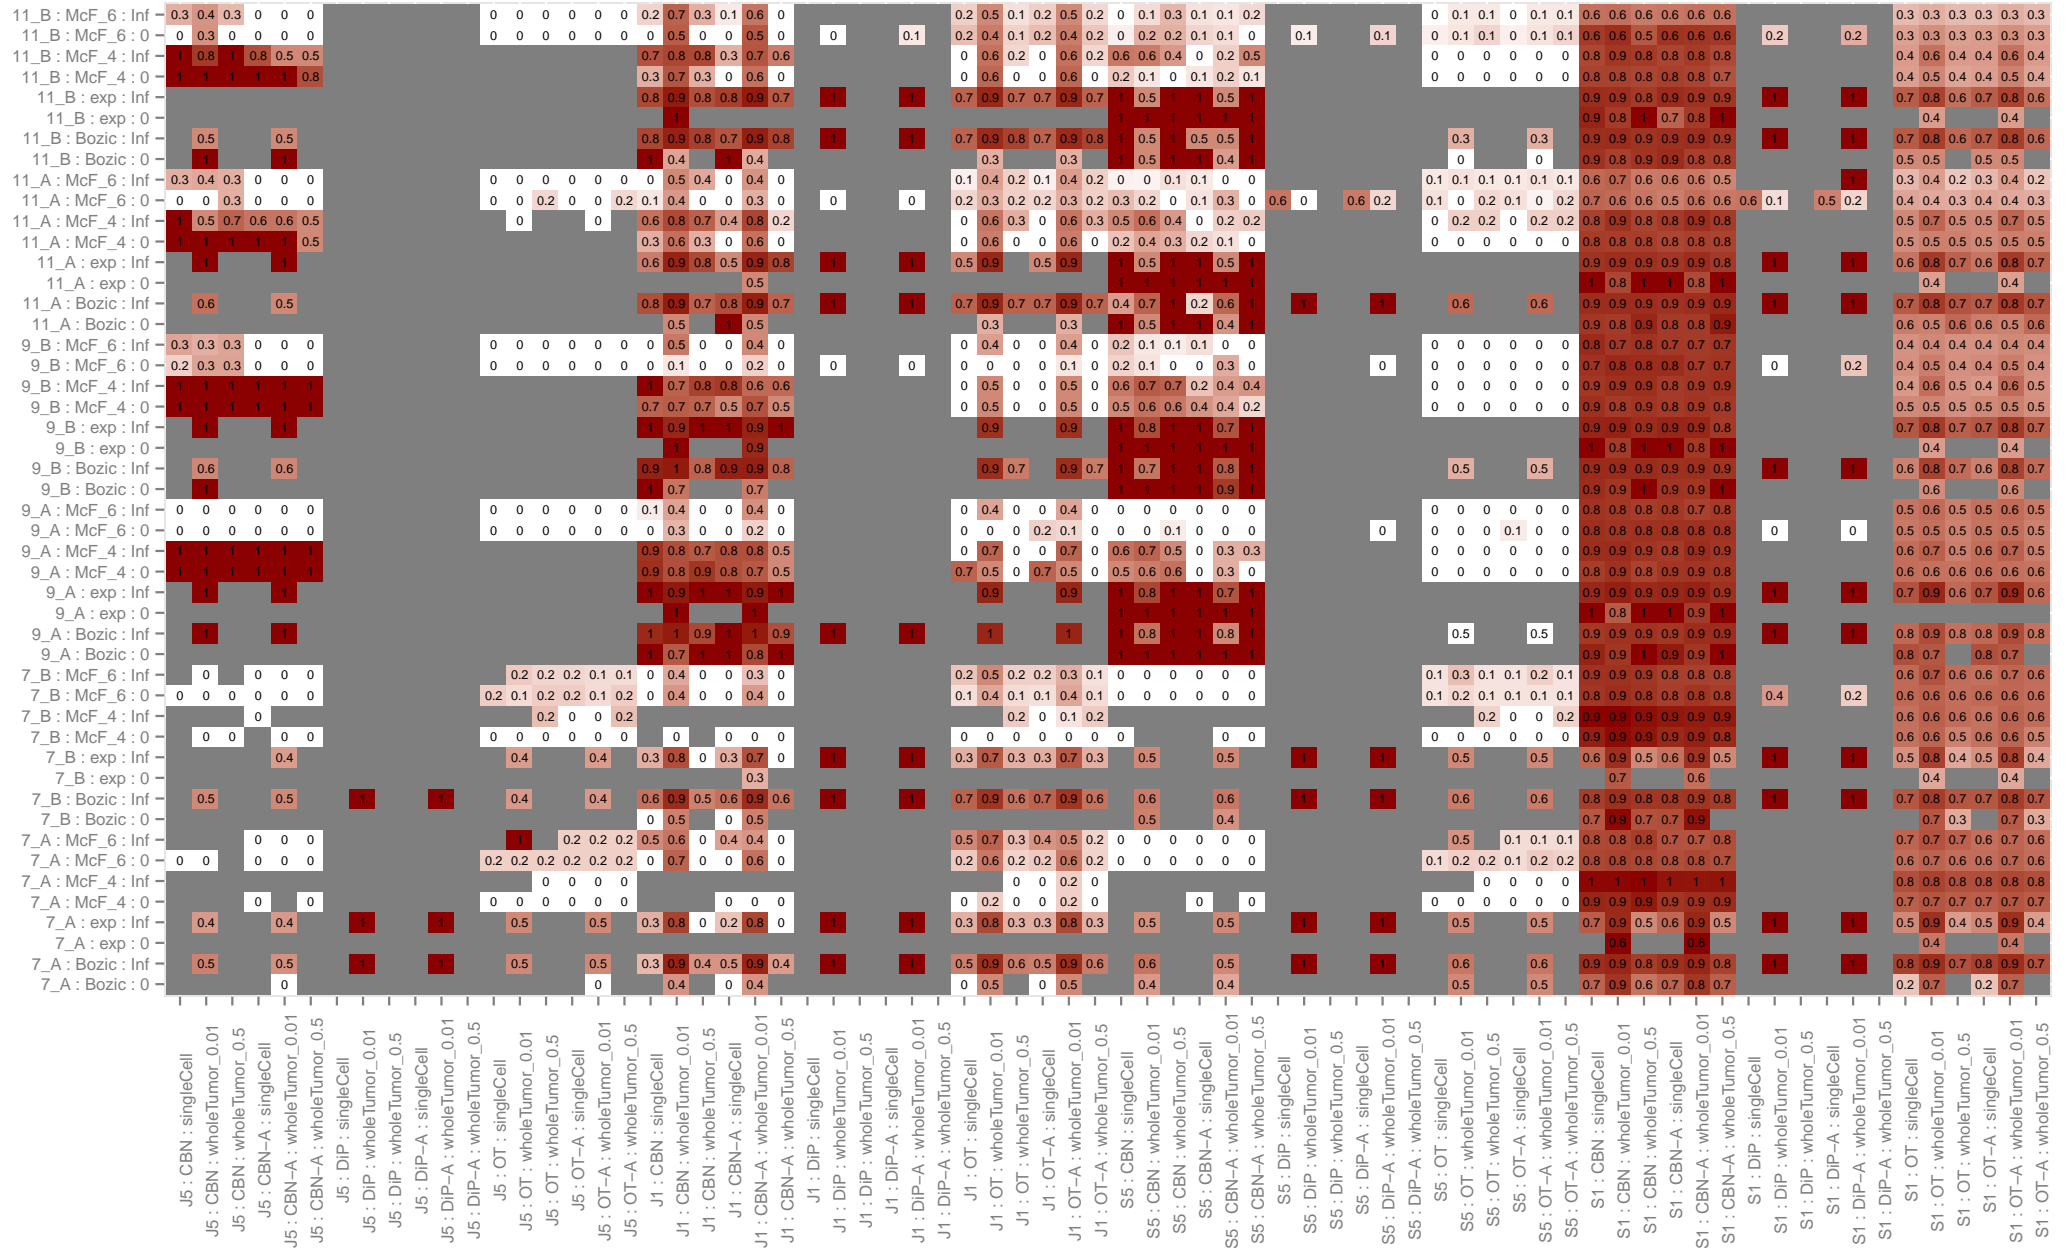

Figure 33: Drivers Unknown, PFD, N = 100, S.Time = unif.

**3.4 PND, Drivers Unknown**





S.Time = unif. PND; N = 1000

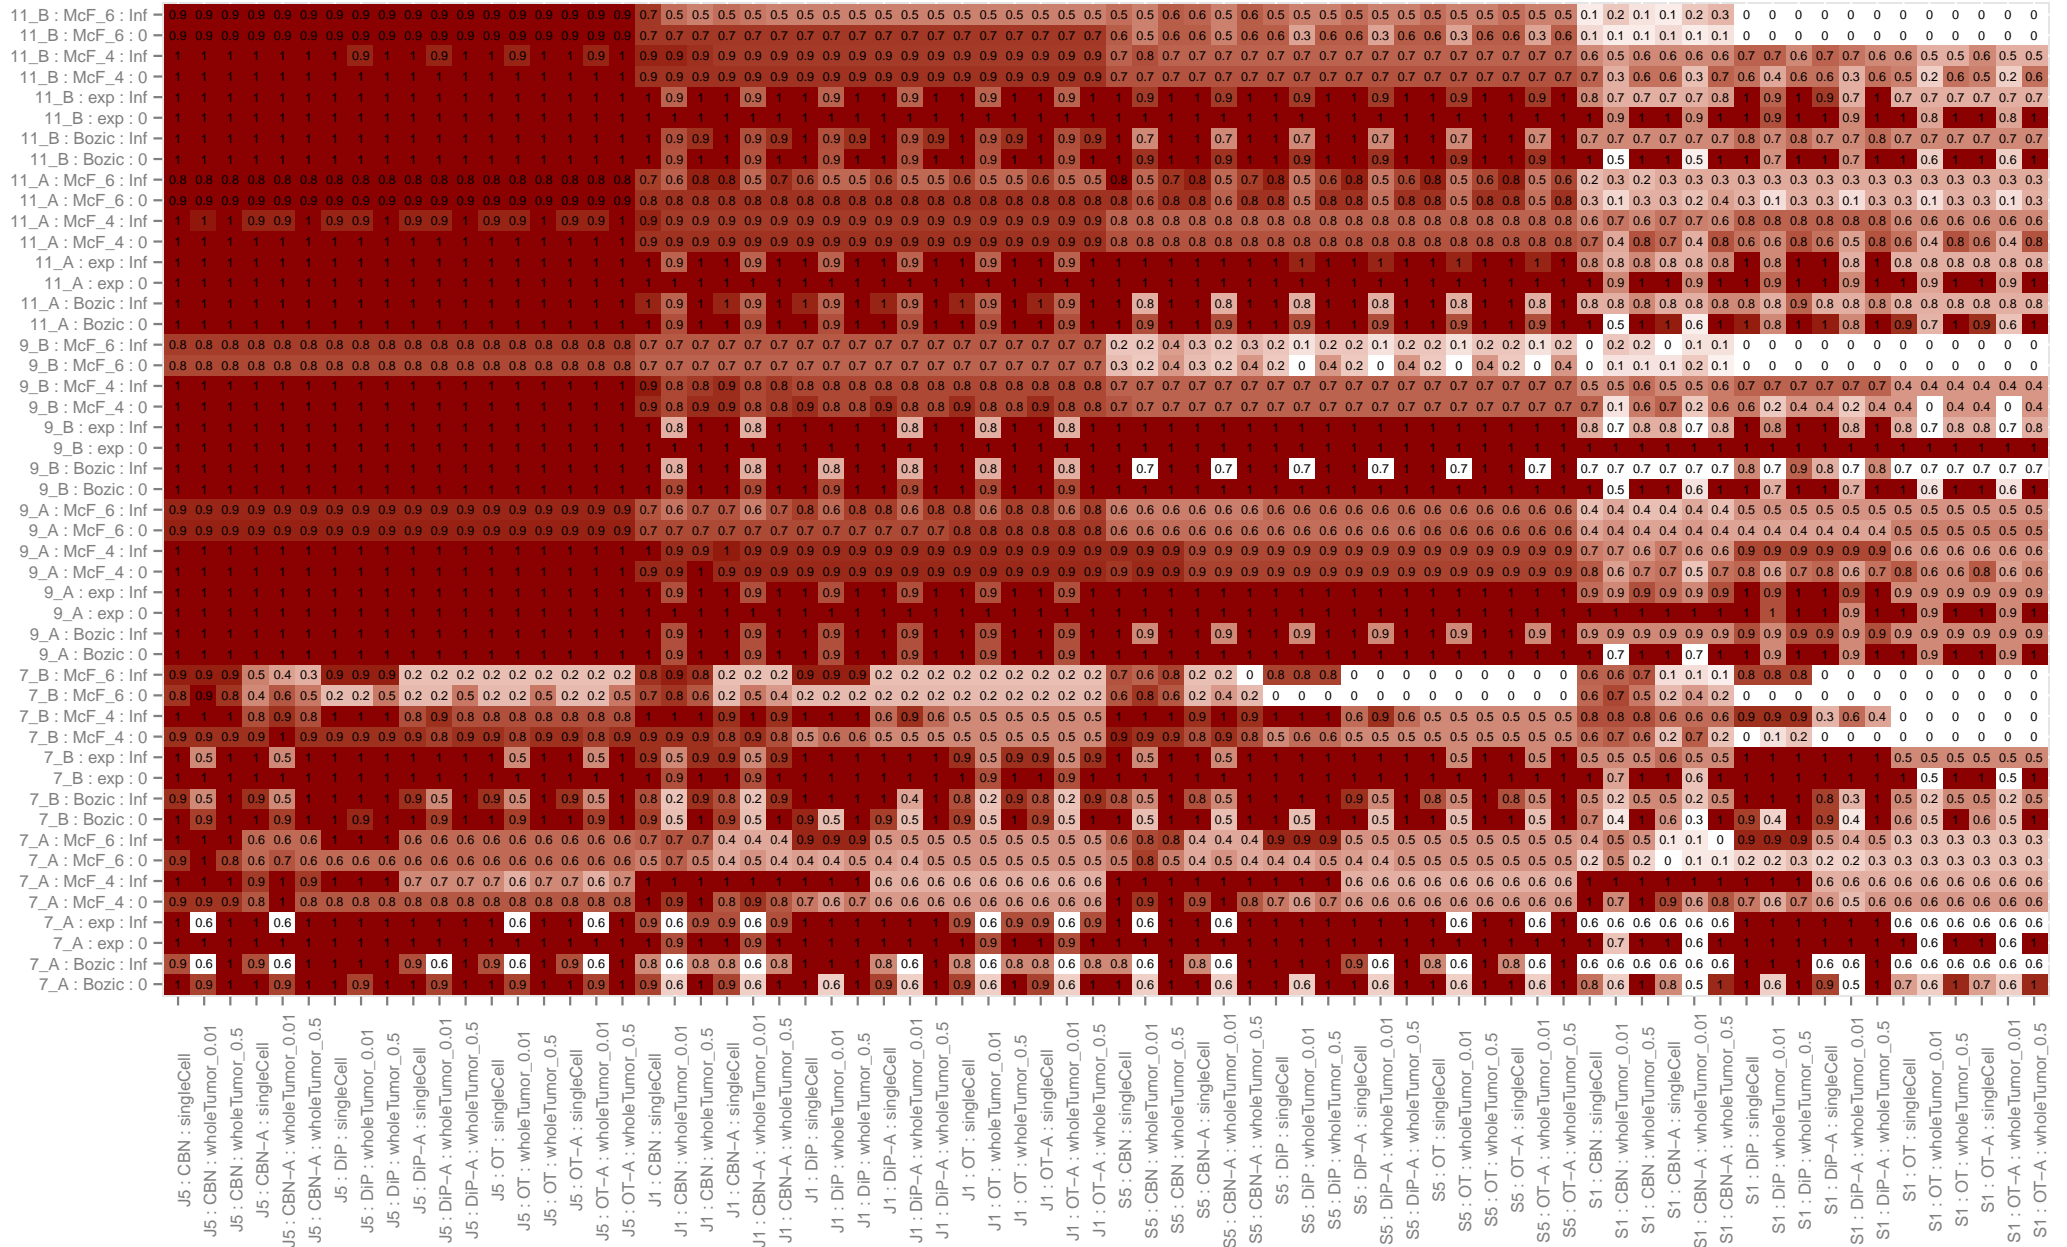

Figure 35: Drivers Unknown, PND, N = 1000, S.Time = unif.

S.Time = last. PND; N = 200

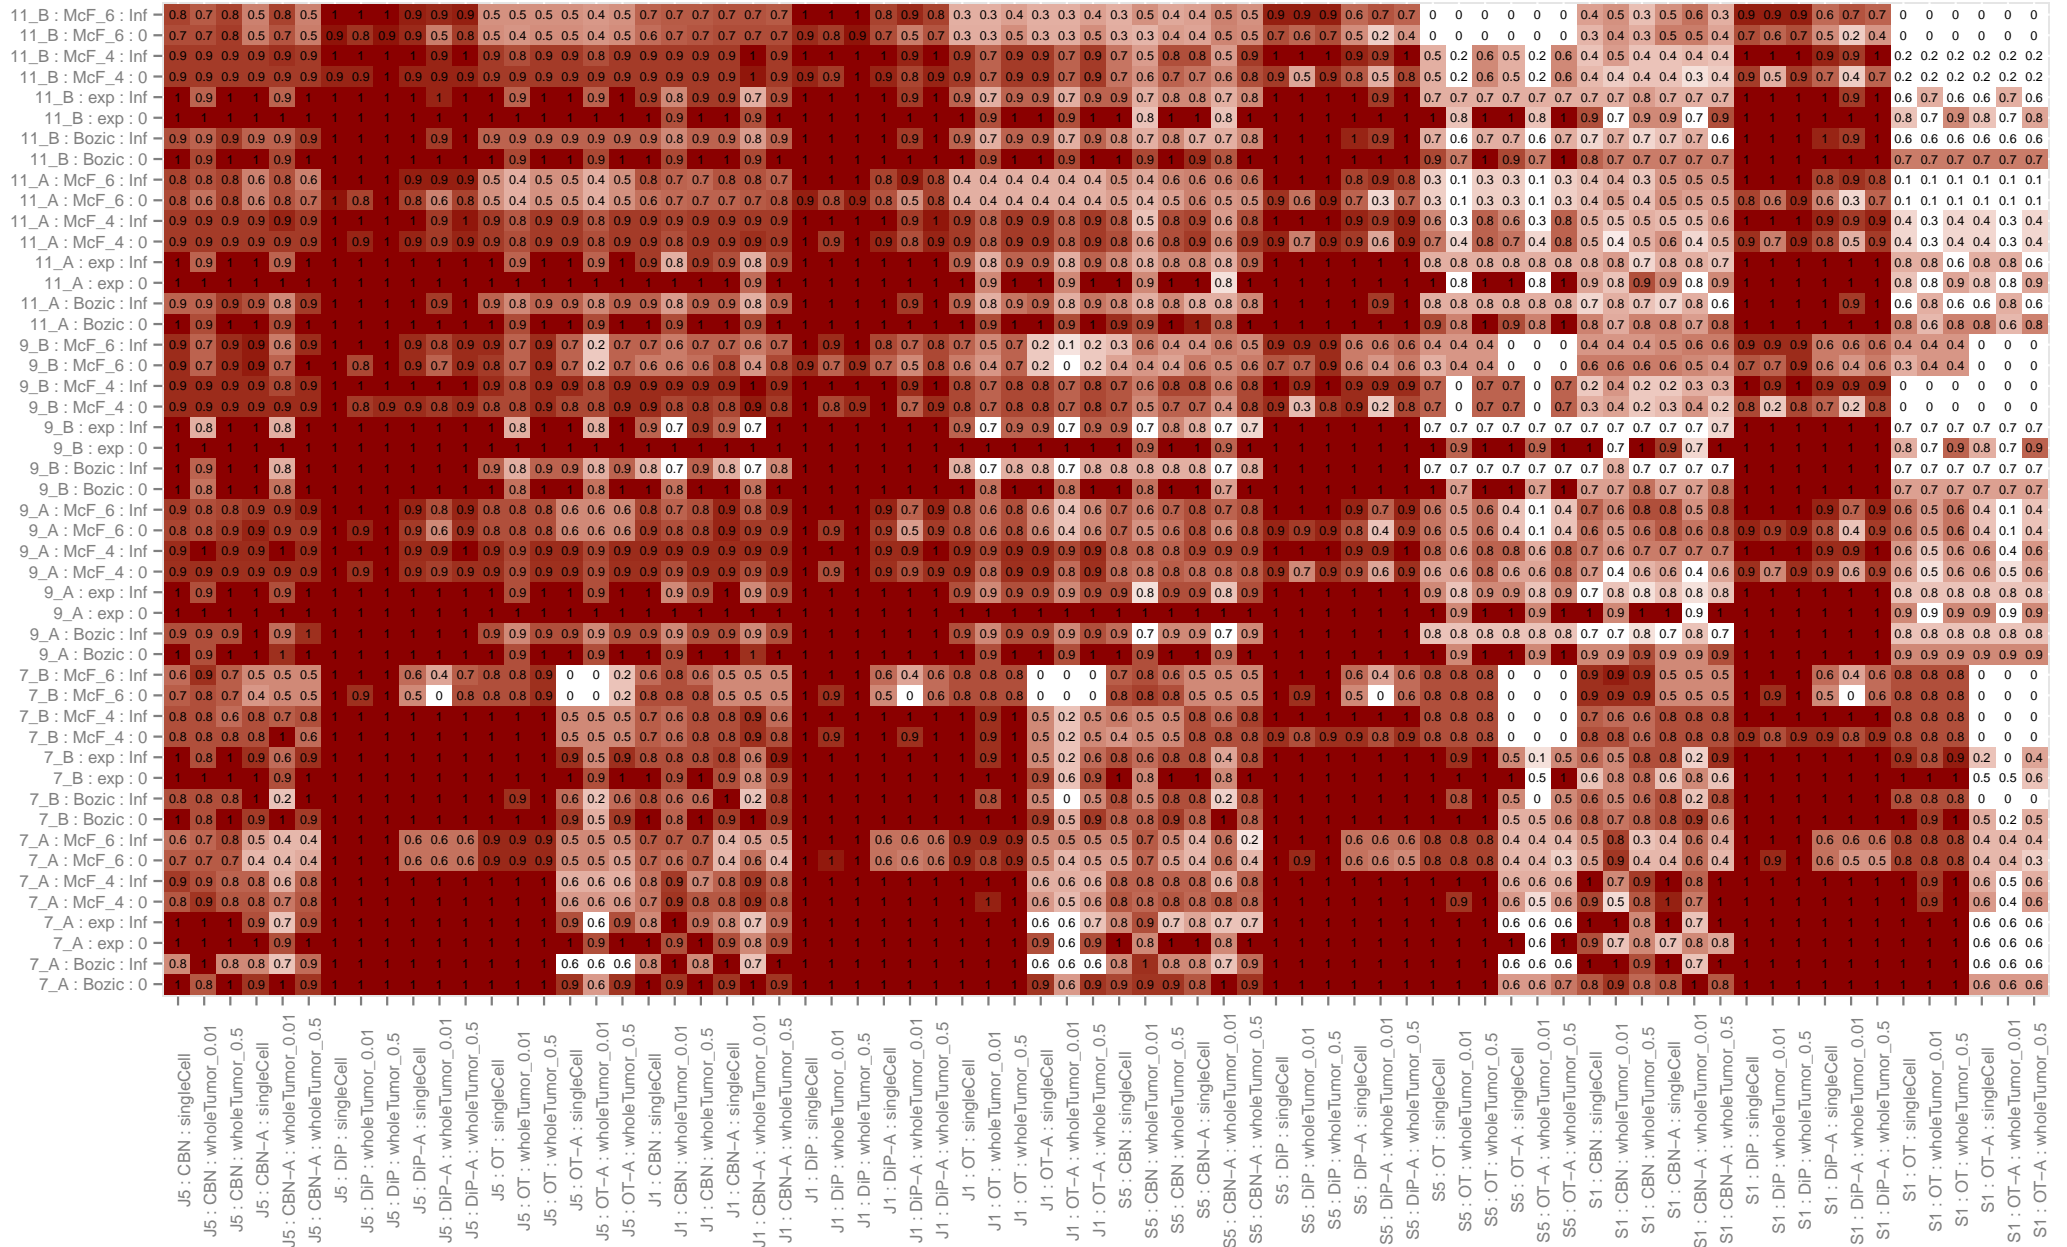

Figure 36: Drivers Unknown, PND, N = 200, S.Time = last



S.Time = unif. PND; N = 200

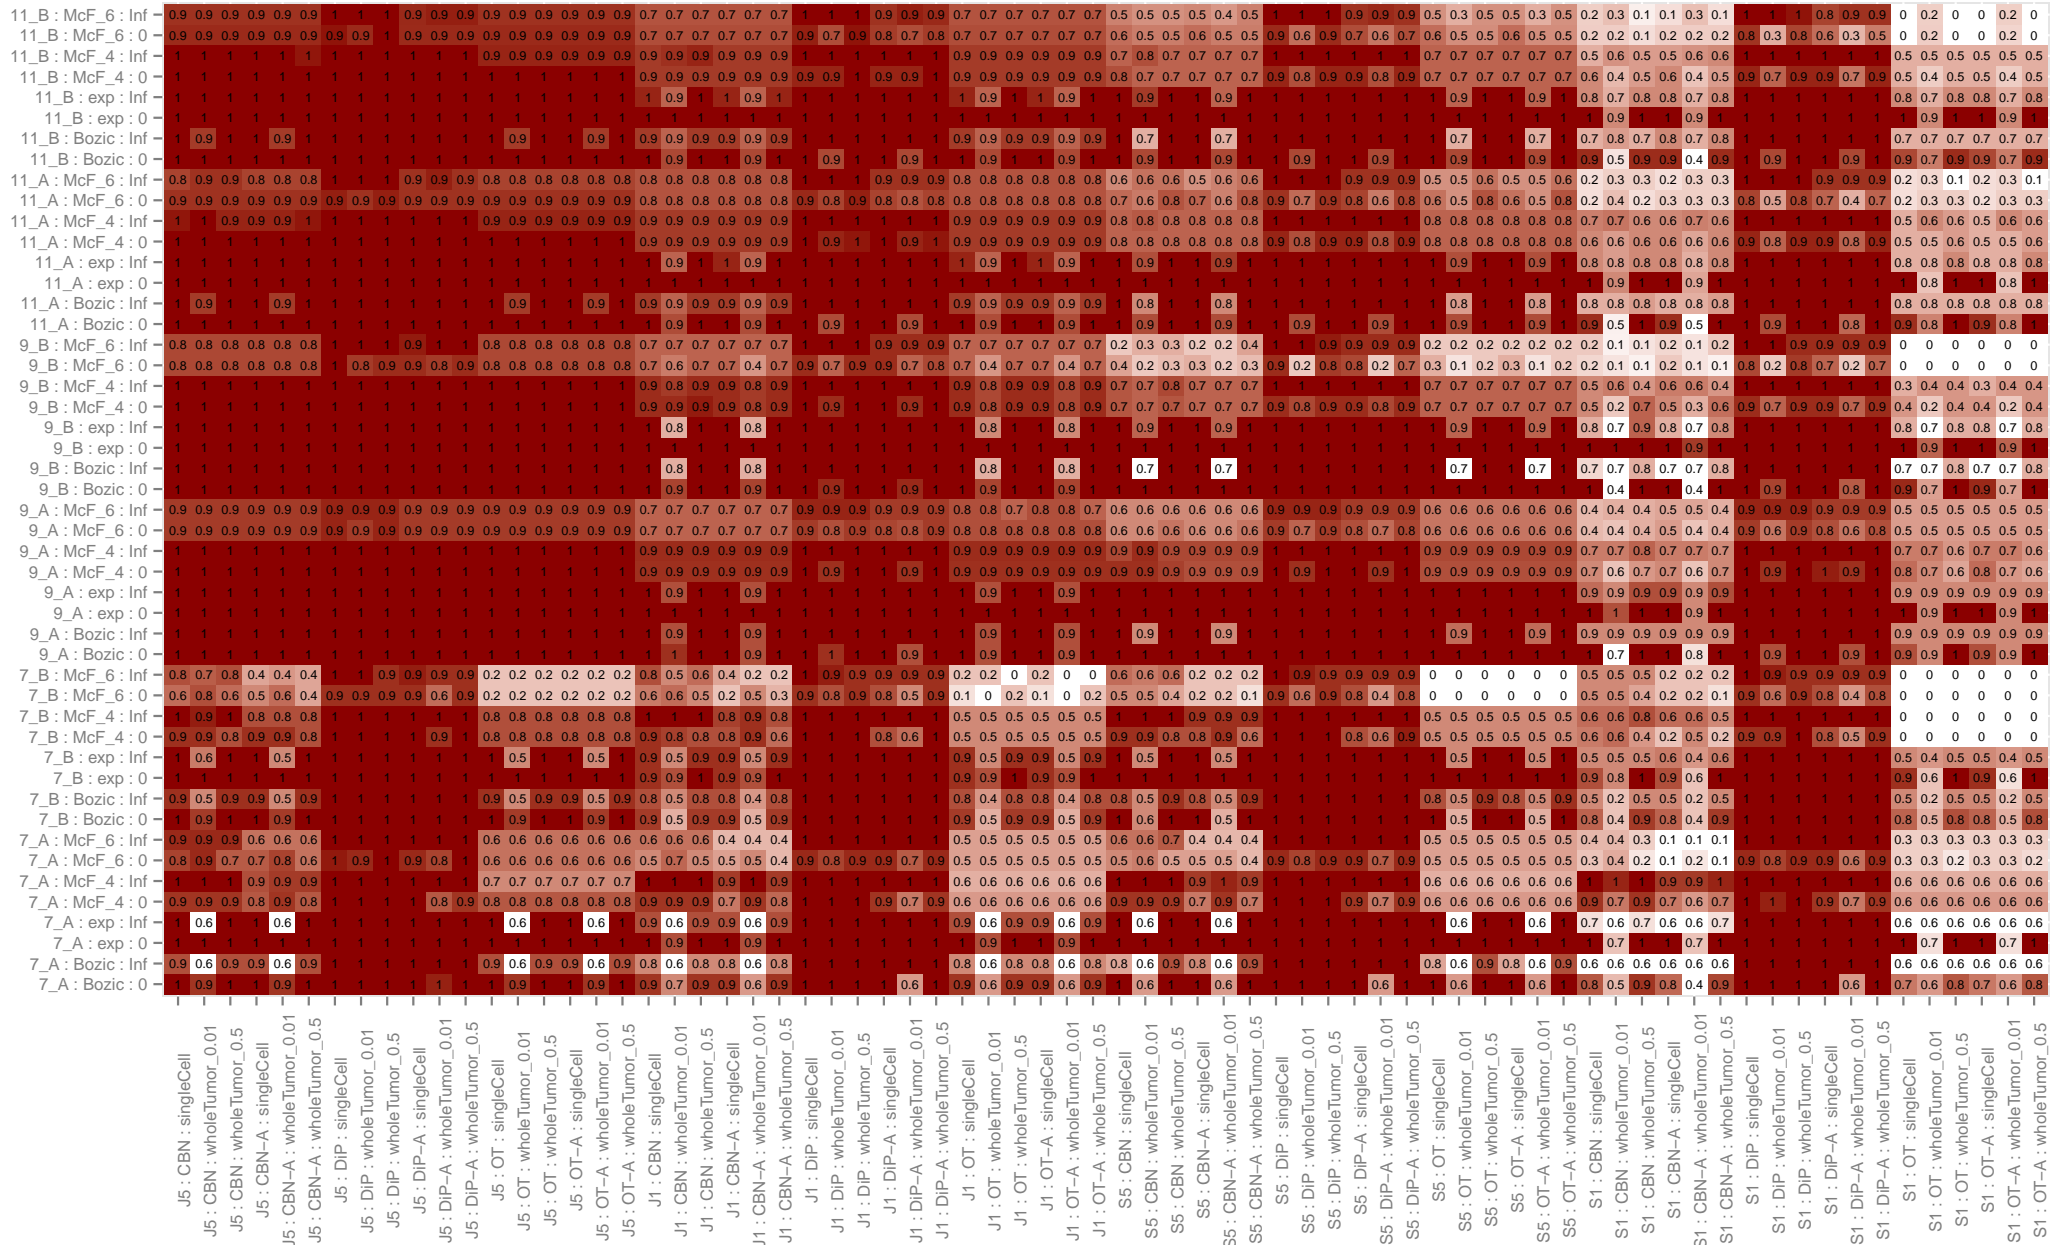

Figure 37: Drivers Unknown, PND, N = 200, S.Time = unif.

S.Time = last. PND; N = 100

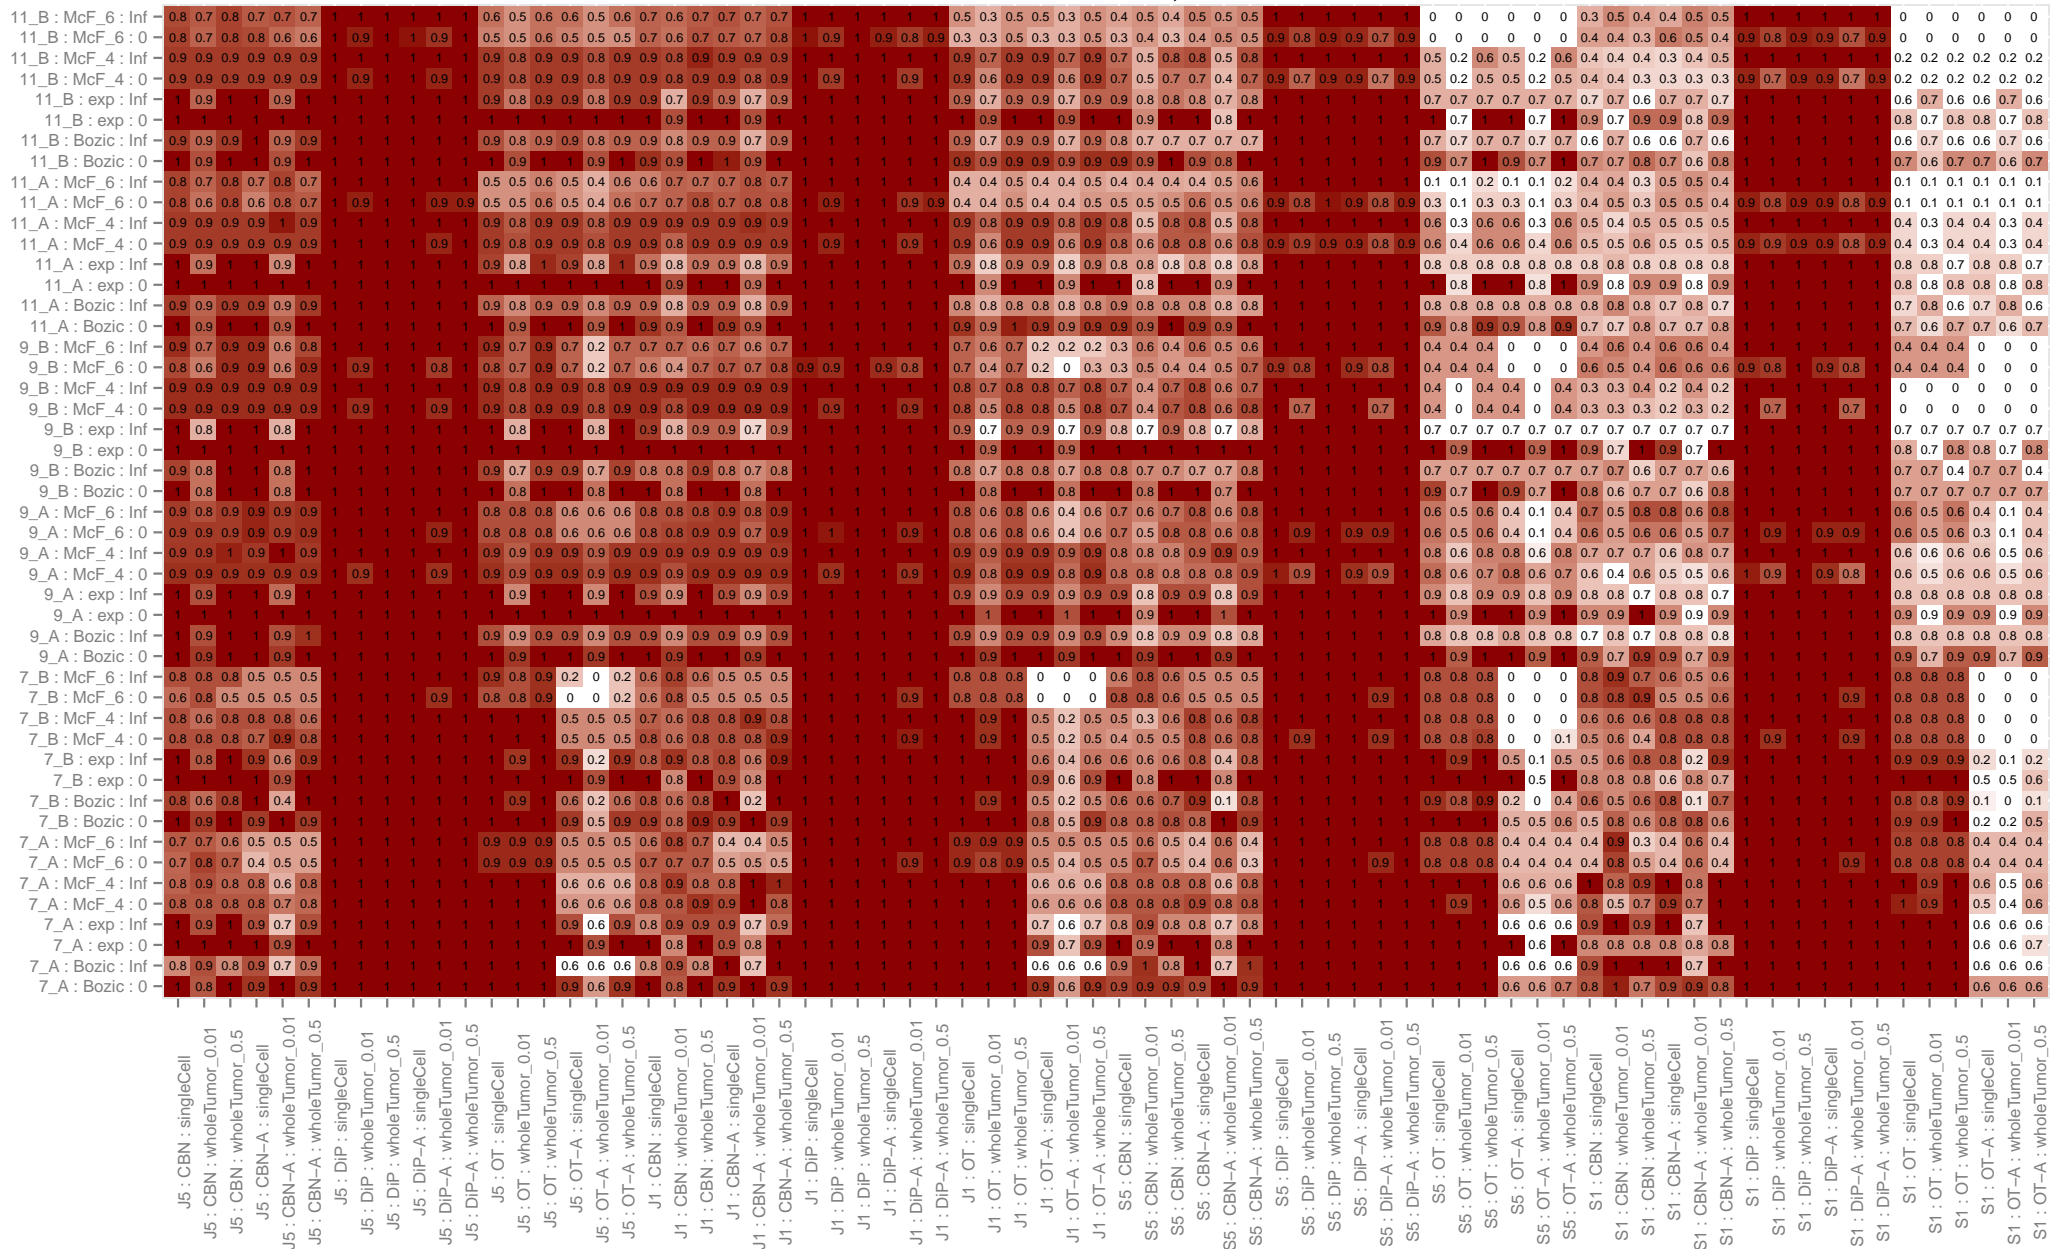

Figure 38: Drivers Unknown, PND, N = 100, S.Time = last

S.Time = unif. PND; N = 100

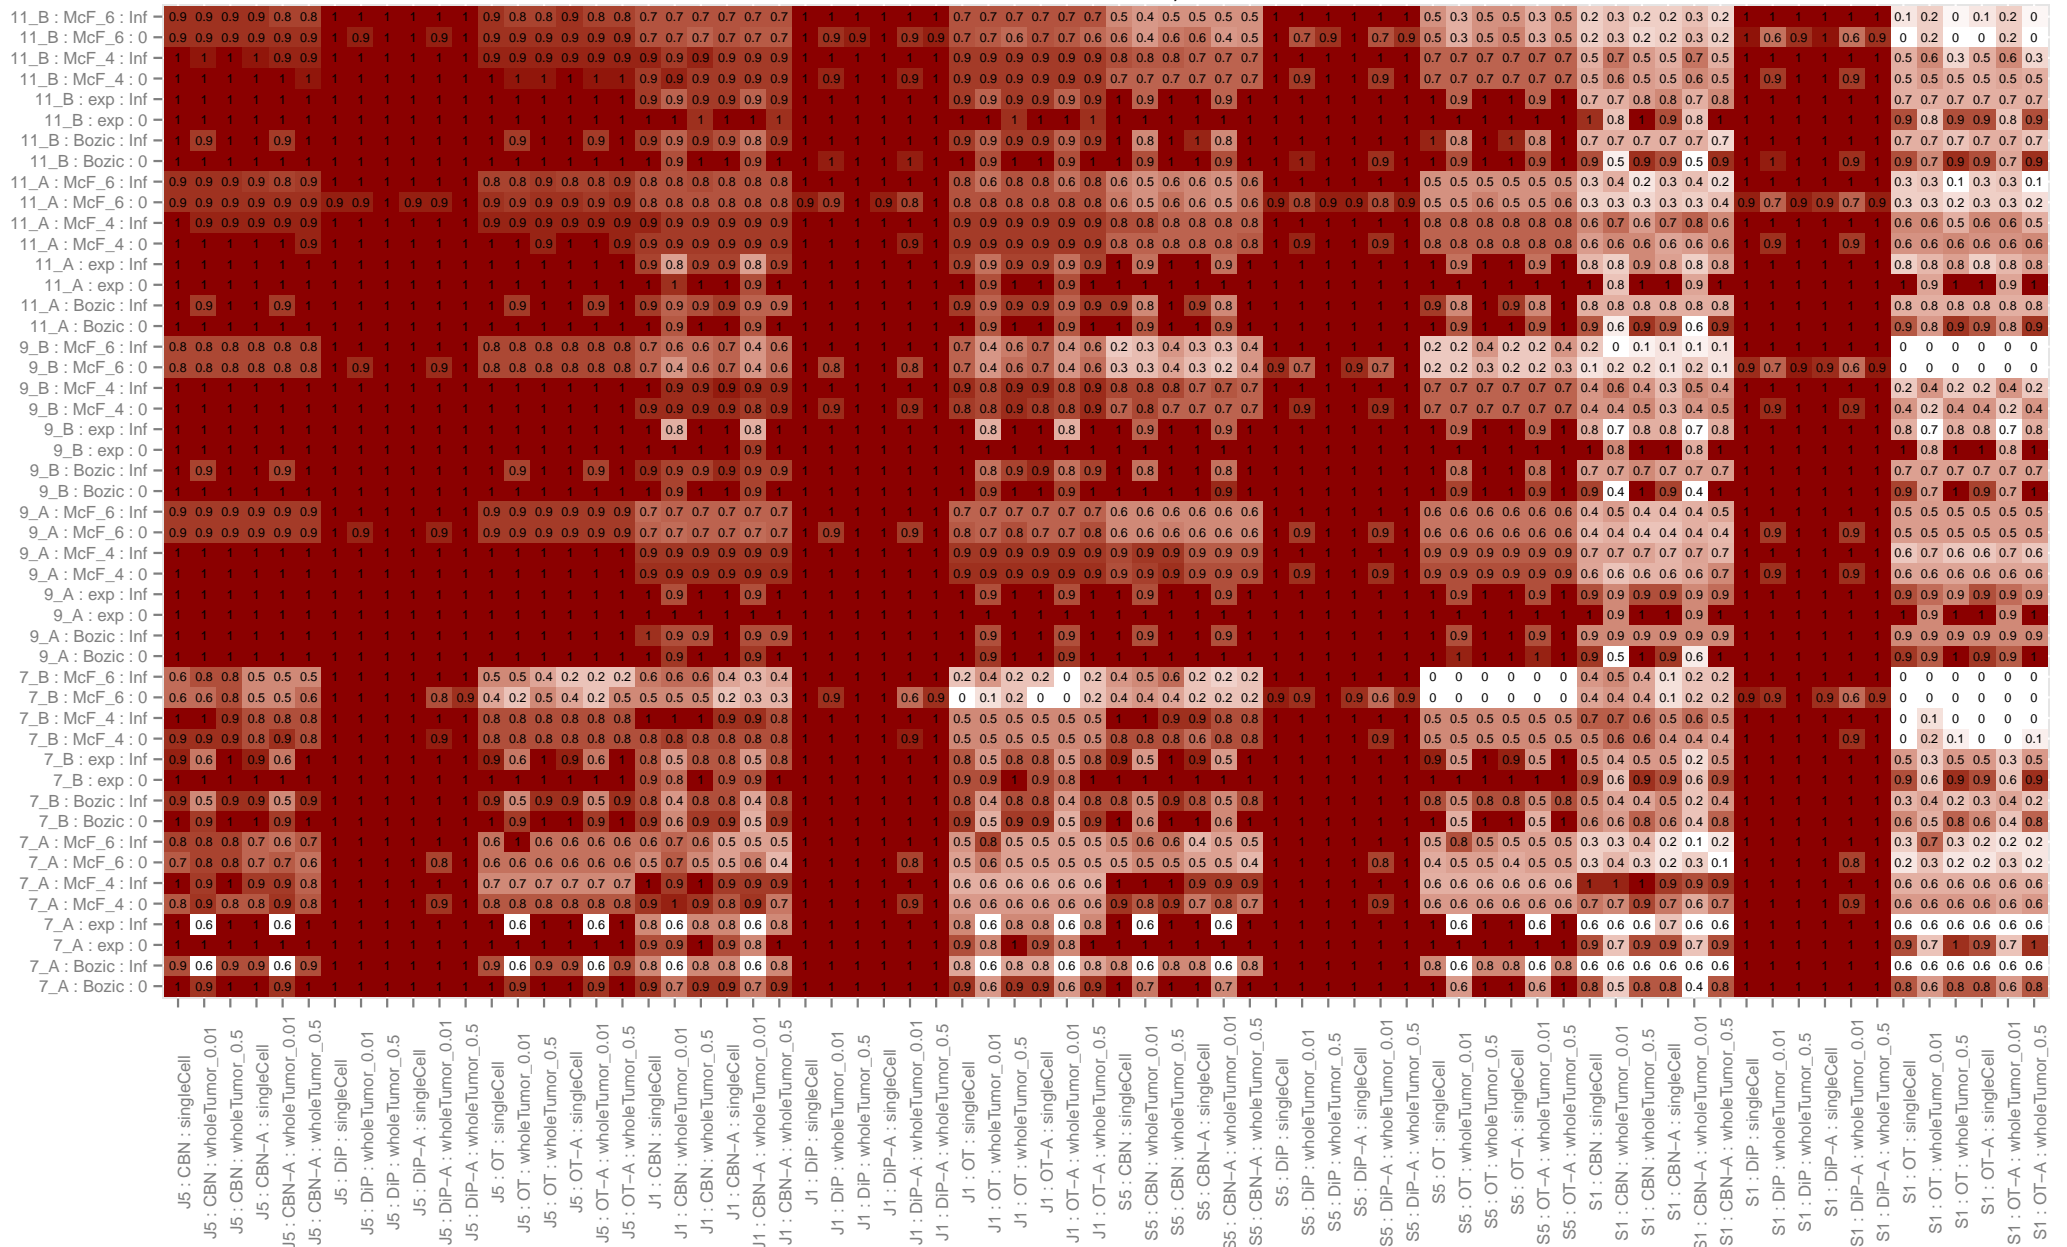

Figure 39: Drivers Unknown, PND, N = 100, S.Time = unif.

### 3.5 FPF, Drivers Unknown



S.Time = unif. FPF (x 100); N = 1000

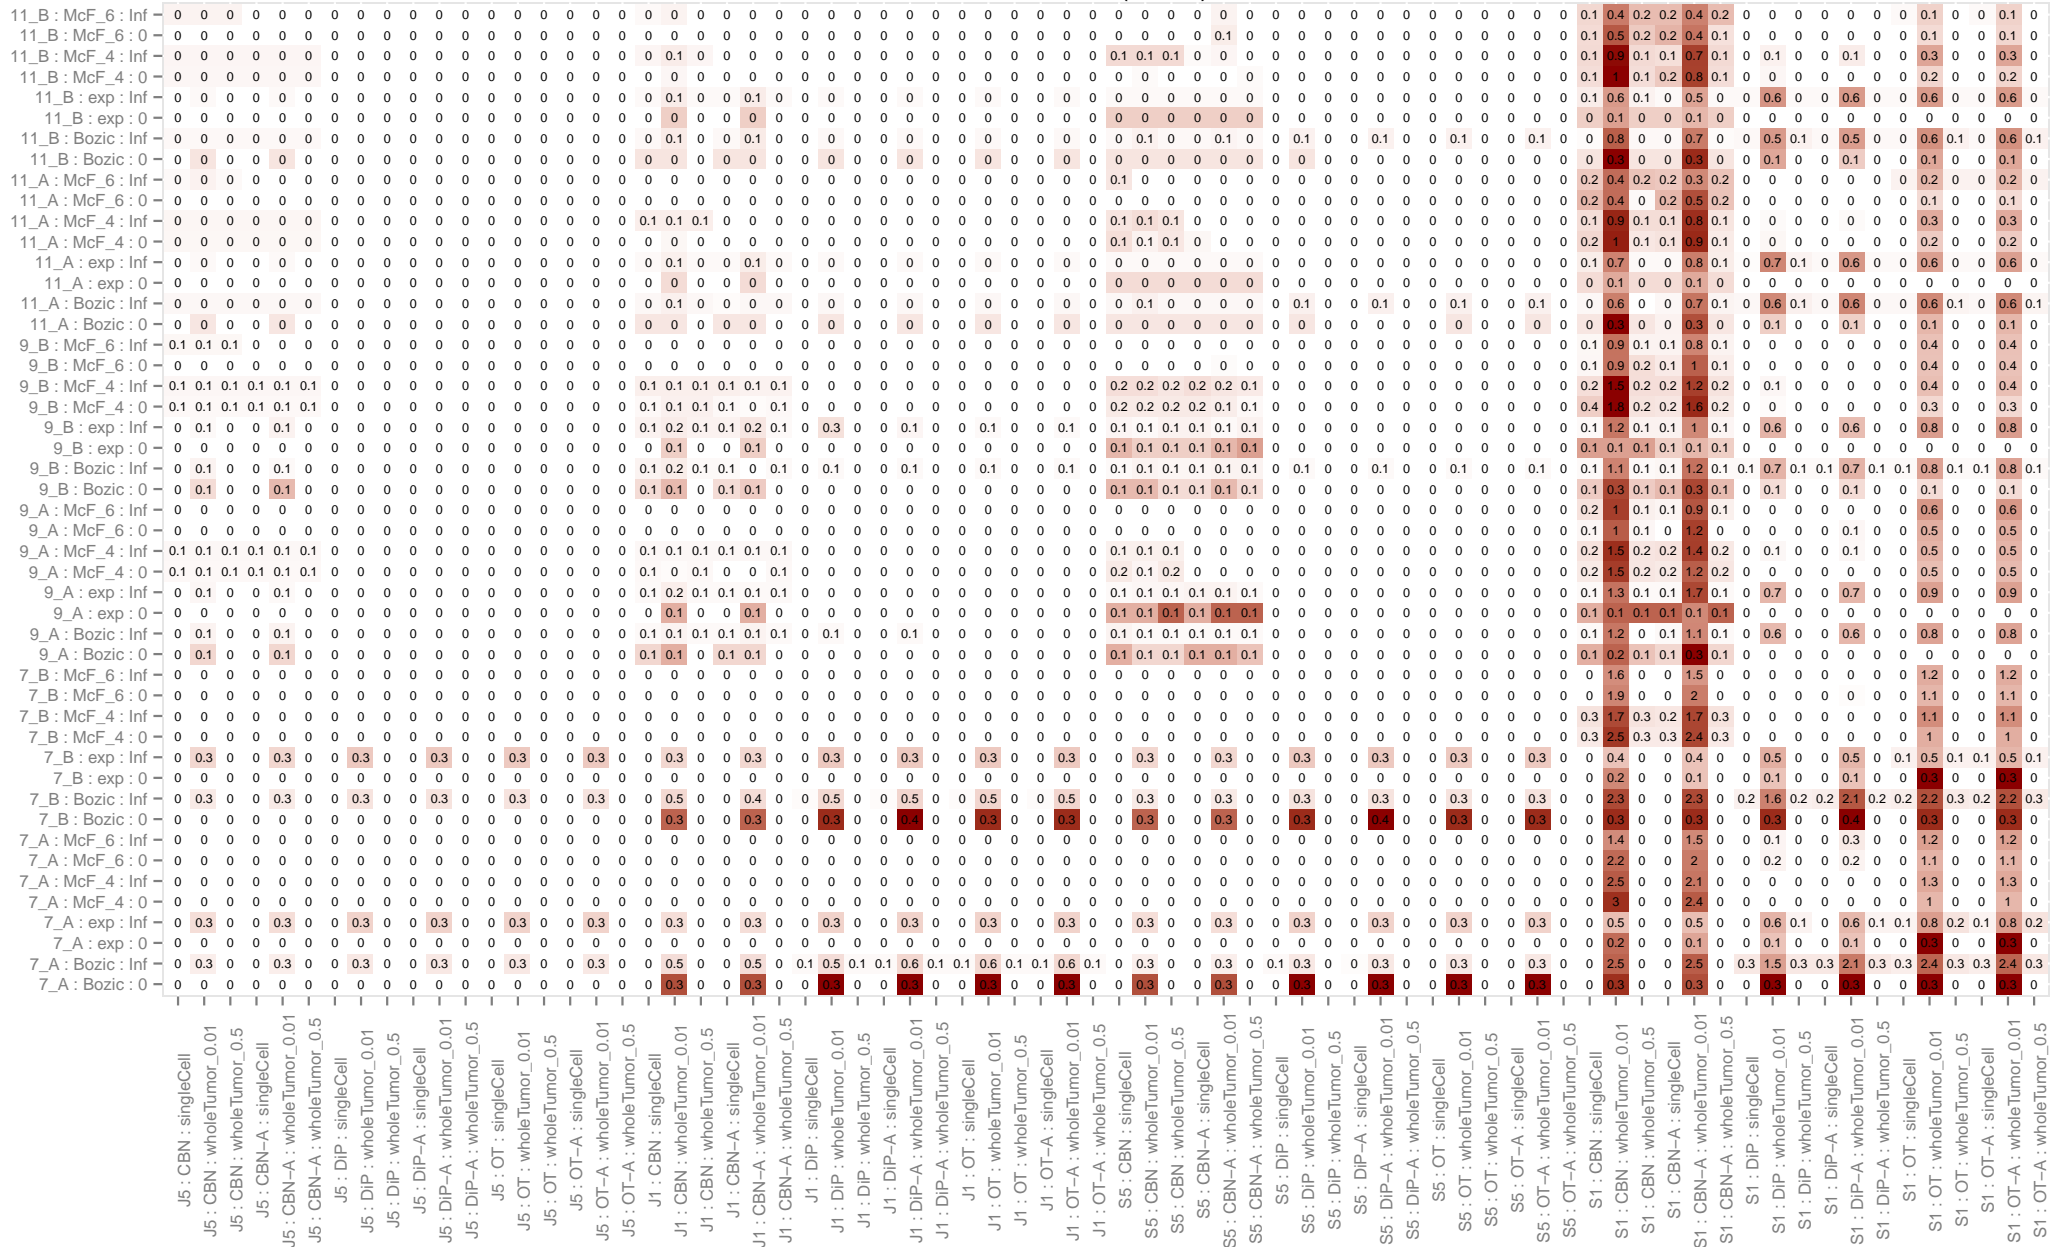

Figure 41: Drivers Unknown, FPF, N = 1000, S.Time = unif.

S.Time = last. FPF (x 100); N = 200

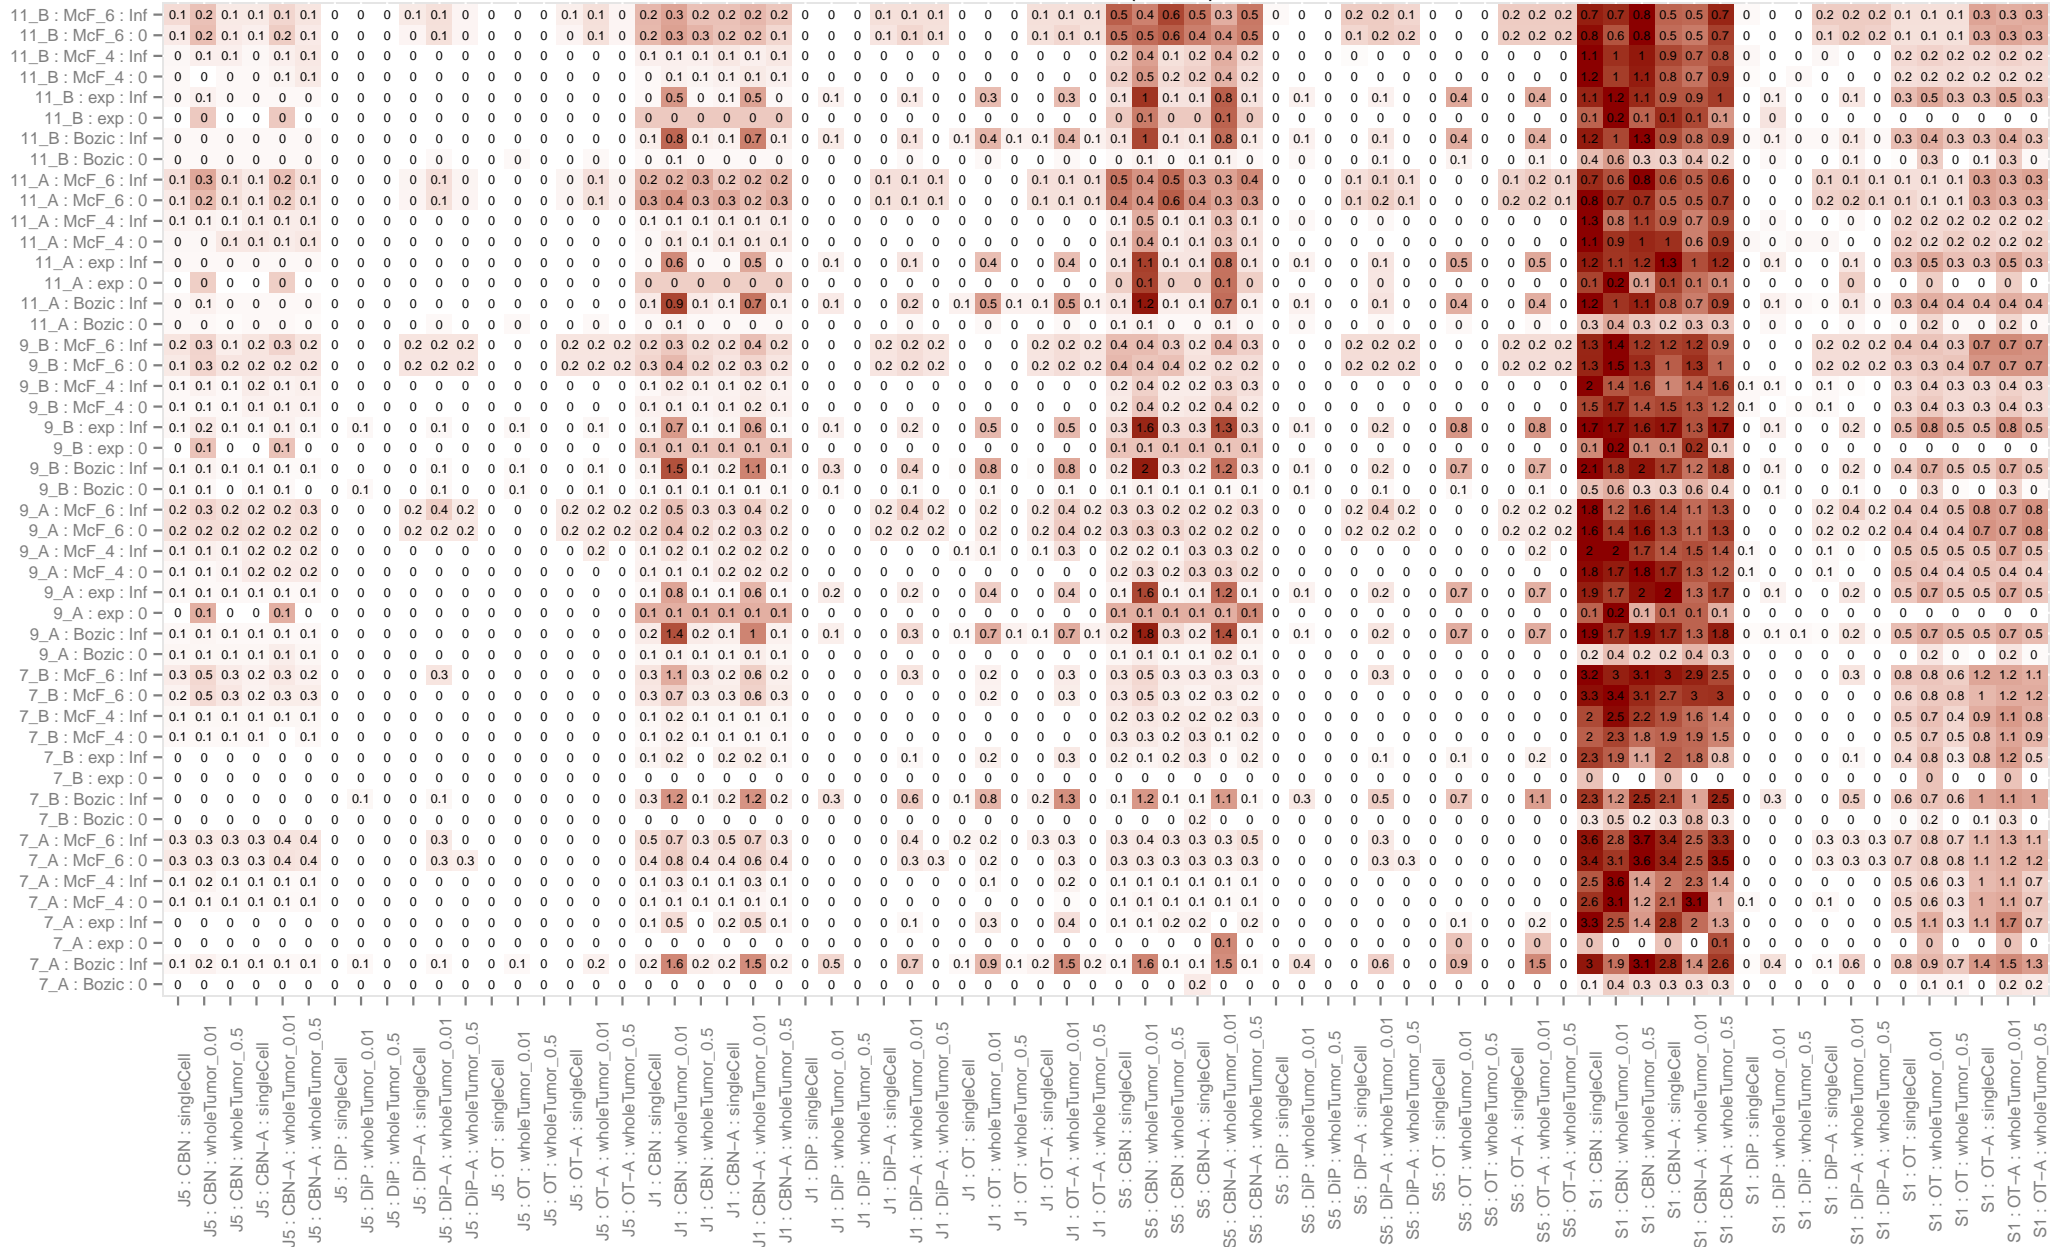

Figure 42: Drivers Unknown, FPF, N = 200, S.Time = last
